# Supplementary material for: Comprehensive analysis of TGF-β-induced mRNAs and ncRNAs in hepatocellular carcinoma
Source: Aging (Albany NY). 2020 Oct 4;12(19):19399–420. doi: 10.18632/aging.103826 (PMC7732333; doi:10.18632/aging.103826)
Supplement: Supplementary Figures [file aging-12-103826-s001..pdf]

## SUPPLEMENTARY FIGURES

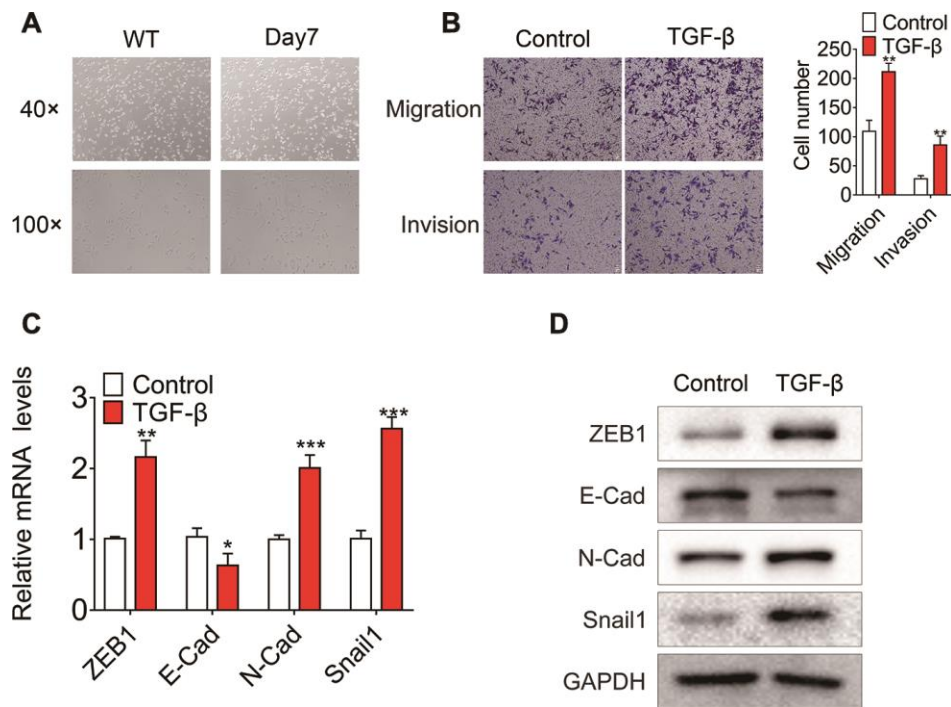

**Supplementary Figure 1. Identification of the EMT cell model based on TGF- $\beta$  treatment.** (A) Phase-contrast micrographs of HLF cells treated with 10 ng/ml TGF- $\beta$  for 7 days or left untreated. Scale bar = 100  $\mu$ m; (B) In vitro migration and invasion of HLF cells treated with 10 ng/ml TGF- $\beta$  or left untreated. The number of migrated cells per field was counted after 48 h. (C) Relative mRNA levels of E-cadherin, ZEB1, SNAIL1, and N-cadherin in HLF cells treated with 10 ng/ml TGF- $\beta$  for 7 days or left untreated. (D) Relative protein levels of E-cadherin, ZEB1, SNAIL1 and N-cadherin in HLF cells treated with 10 ng/ml TGF- $\beta$  for 7 days or left untreated.

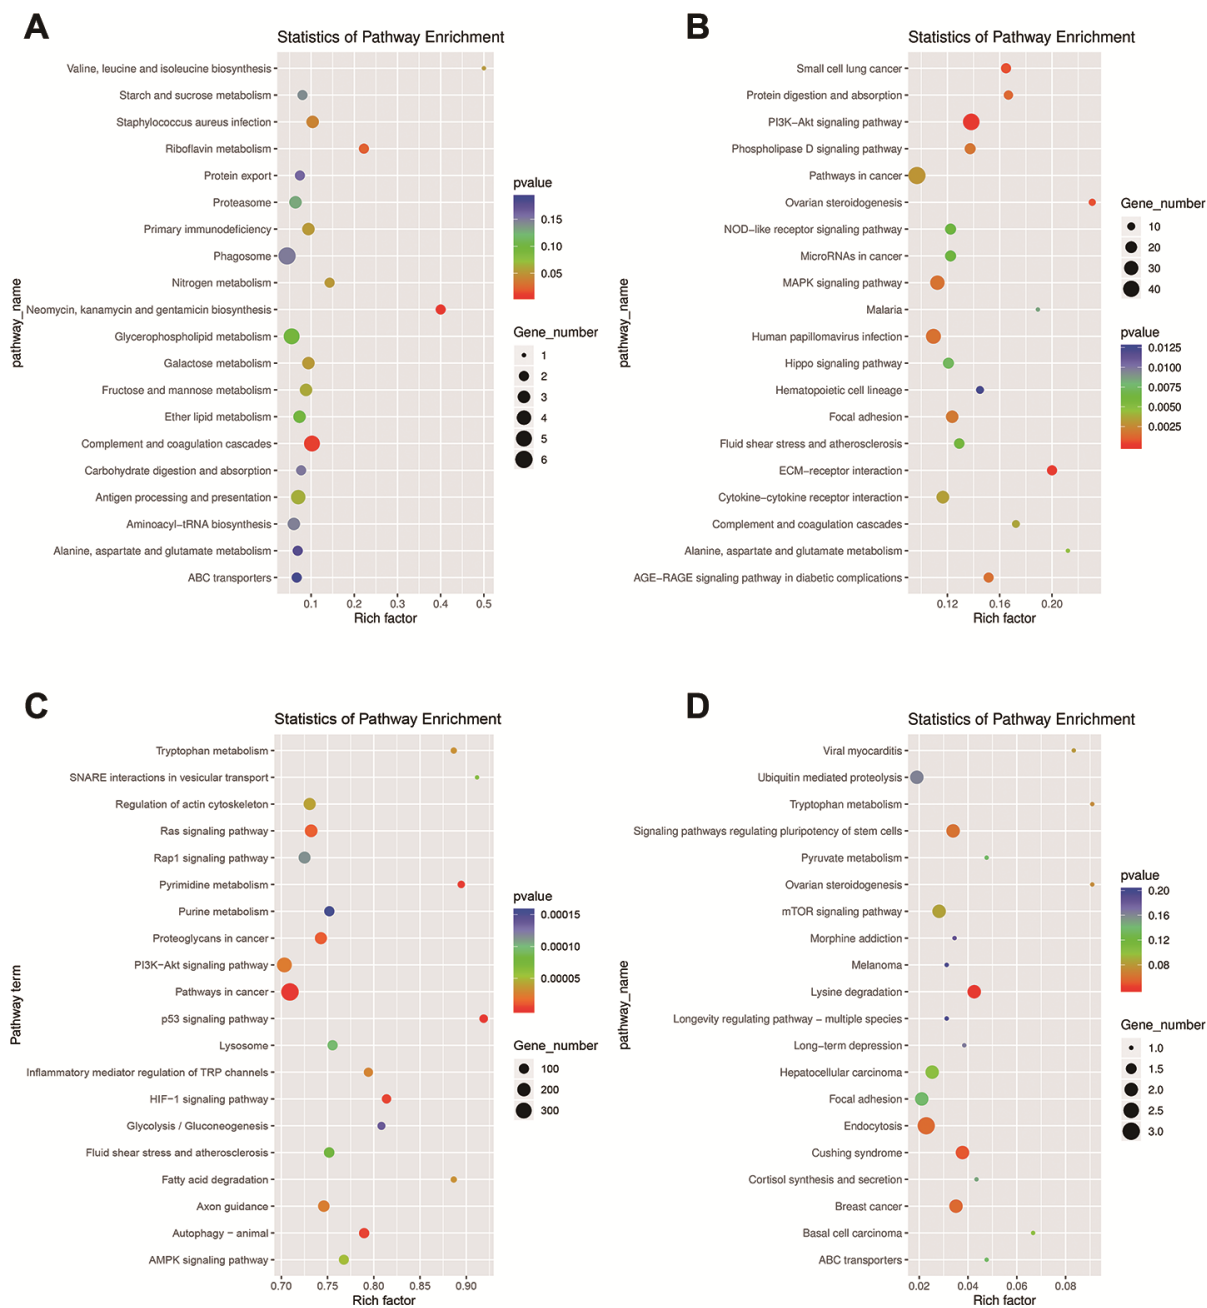

**Supplementary Figure 2. KEGG pathway analysis of dysregulated RNAs.** Top 20 KEGG pathways for the differentially expressed lncRNAs (A), mRNAs (B), miRNAs (C) and circRNAs (D). The color and size of each circle represents the P-value and the number of genes, respectively.

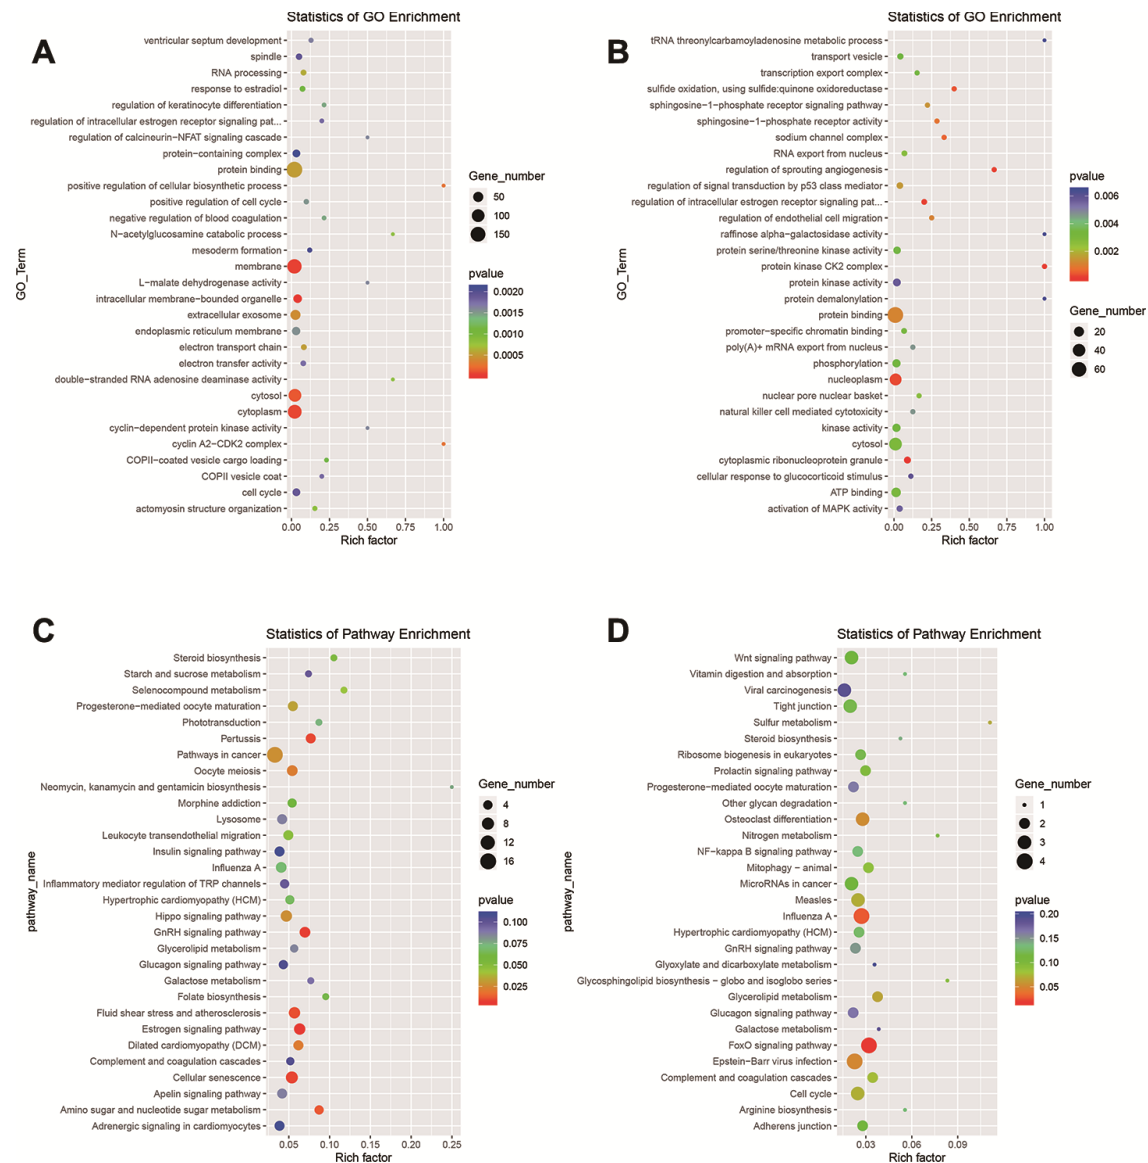

**Supplementary Figure 3. GO and KEGG pathway analysis of two partial ceRNA networks.** GO enrichment analysis for the modules of the lncRNA SLC7A11-AS1 (A) and hsa\_circ\_0006123 (B) ceRNA networks. KEGG pathway enrichment analysis for the modules of the lncRNA SLC7A11-AS1 (C) and hsa\_circ\_0006123 (D) ceRNA networks.

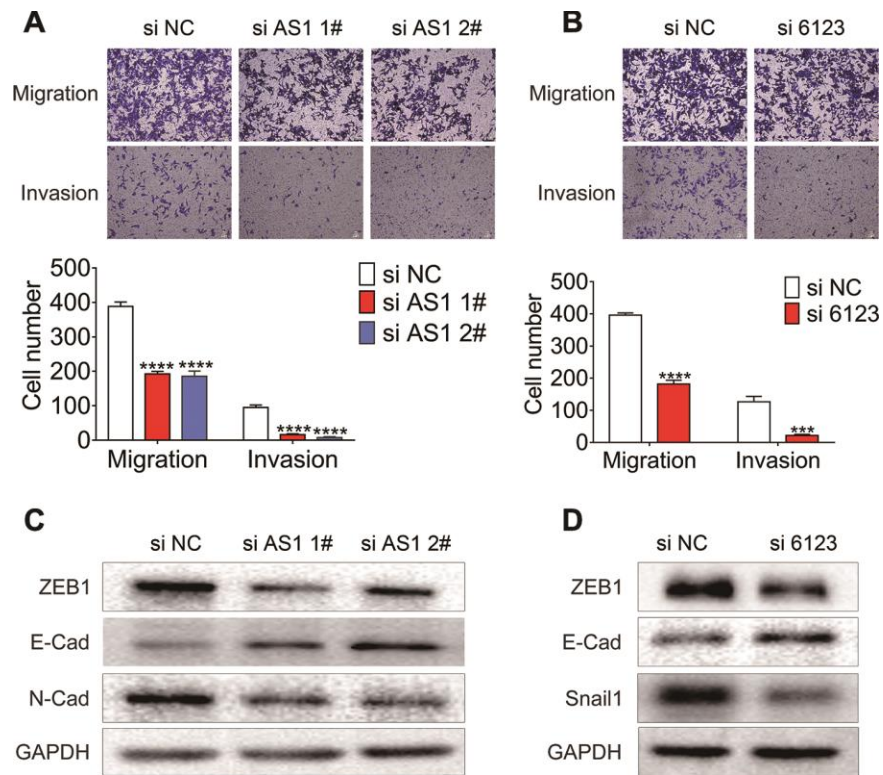

**Supplementary Figure 4. Knockdown of lncRNA SLC7A11-AS1 and hsa\_circ\_0006123 suppresses the migration and invasion of HLF cell.** Migration and invasion of HLF following treatment with si-lncRNA SLC7A11-AS1 (A) or si-hsa\_circ\_0006123 (B). Relative protein levels of EMT markers in HLF cells following treatment with si-lncRNA SLC7A11-AS1 (C) or si-hsa\_circ\_0006123 (D).
