# Supplementary material for: Comprehensive analysis of TGF-&#x3B2;-induced mRNAs and ncRNAs in hepatocellular carcinoma
Source: publisher site journal article supplement (doi:10.18632/aging.103826), 2020-10-02
Supplement: Supplementary file [file aging-v12i19-103826-supplementary-material-SD12.pdf]

**SUPPLEMENTARY TABLE**

**Supplementary Table 11. Clinicopathologic characteristics of patients with hepatocellular carcinoma.**

| <b>Clinicopathological variables</b> | <b>Number<br/>N=81</b> | <b>Percentage</b> |
|--------------------------------------|------------------------|-------------------|
| <b>Gender</b>                        |                        |                   |
| Male                                 | 58                     | 71.6              |
| Female                               | 23                     | 28.4              |
| <b>Age</b>                           |                        |                   |
| ≤50                                  | 19                     | 23.5              |
| >50                                  | 62                     | 76.5              |
| <b>AFP (ug/L)</b>                    |                        |                   |
| ≤20                                  | 23                     | 28.4              |
| >20                                  | 58                     | 71.6              |
| <b>HBV</b>                           |                        |                   |
| Negative                             | 10                     | 12.3              |
| Positive                             | 71                     | 87.7              |
| <b>HCV</b>                           |                        |                   |
| Negative                             | 78                     | 96.3              |
| Positive                             | 3                      | 3.7               |
| <b>Tumor size (cm)</b>               |                        |                   |
| ≤5                                   | 26                     | 32.1              |
| >5                                   | 55                     | 67.9              |
| <b>Vascular invasion</b>             |                        |                   |
| No                                   | 33                     | 40.7              |
| Yes                                  | 48                     | 59.3              |
| <b>Distant metastasis</b>            |                        |                   |
| No                                   | 79                     | 97.5              |
| Yes                                  | 2                      | 2.5               |
| <b>Differentiation</b>               |                        |                   |
| I- II                                | 55                     | 67.9              |
| III -IV                              | 26                     | 32.1              |
| <b>TNM stage</b>                     |                        |                   |
| I                                    | 28                     | 34.5              |
| II -III -IV                          | 53                     | 65.5              |
| <b>BCLC stage</b>                    |                        |                   |
| 0+A                                  | 36                     | 44.4              |
| B+C                                  | 45                     | 55.6              |
| <b>Adjuvant TACE</b>                 |                        |                   |
| No                                   | 78                     | 96.3              |
| Yes                                  | 3                      | 3.7               |
