# Supplementary material for: Comprehensive analysis of TGF-β-induced mRNAs and ncRNAs in hepatocellular carcinoma
Source: Aging (Albany NY). 2020 Oct 4;12(19):19399–420. doi: 10.18632/aging.103826 (PMC7732333; doi:10.18632/aging.103826)
Supplement: Supplementary Table 1 [file aging-12-103826-s002..xlsx]

## Sheet: Sheet1
Supplementary Table 1. Differentially expressed lncRNAs upon treatment with TGF-β.
t_id	class_code	chr	strand	start	end	t_name	num_exons	length	gene_id	gene_name	FPKM.TGFB_1	FPKM.TGFB_2	FPKM.TGFB_3	FPKM.TGFB_4	FPKM.DMSO_1	FPKM.DMSO_2	FPKM.DMSO_3	FPKM.DMSO_4	fc	log2(fc)	pval	qval	regulation	significant
142035	o	chr21	+	9365226	9369304	MSTRG.21023.9	2	3725	MSTRG.21023	CR381653	0	0	0	0	2.1931	1.23405	1.94266	3.58847	-inf	-inf	3.59912e-12	1.45925e-08	down	yes
151749	j	chr3	-	28324306	28348824	MSTRG.22494.5	7	1044	MSTRG.22494	AZI2	0	3.66004	6.34079	3.19344	0	0	0	0	inf	inf	1.16503e-06	0.000340644	up	yes
20829	i	chr10	-	1558366	1560460	MSTRG.3370.1	2	1741	MSTRG.3370	ADARB2	0	0	0	0	1.84398	0	3.39556	2.86296	-inf	-inf	1.28046e-06	0.000356525	down	yes
11848	j	chr1	-	148432959	148459757	MSTRG.2033.10	4	1646	MSTRG.2033	LINC01138	0	1.24751	2.32473	2.27556	0	0	0	0	inf	inf	1.43577e-06	0.000379503	up	yes
99351	u	chr17	+	74980954	74984870	MSTRG.15118.2	2	2427	MSTRG.15118	.	0.966504	1.44415	0.849749	0	0	0	0	0	inf	inf	1.5934e-06	0.0004035	up	yes
62404	o	chr14	+	49790842	49862846	MSTRG.9523.2	3	316	MSTRG.9523	RNU6-539P	0	0	1689.36	714.078	0	0	0	0	inf	inf	2.2474e-06	0.000510229	up	yes
132236	o	chr2	-	190690378	190844594	MSTRG.19662.5	5	620	MSTRG.19662	AC006460	0	0	0	0	5.04908	0	4.08163	2.06677	-inf	-inf	3.90588e-06	0.000758925	down	yes
81045	o	chr16	-	29808630	29811206	MSTRG.12416.2	2	1105	MSTRG.12416	AC009133	3.89091	2.28561	0.10139	0.004194	0	0	0	0	inf	inf	4.05975e-06	0.000783815	up	yes
189679	j	chr6	+	75601927	75663505	MSTRG.28451.4	8	1482	MSTRG.28451	SENP6	0	0	0	0	0	0.585535	2.70466	1.44311	-inf	-inf	5.68559e-06	0.0010295	down	yes
174443	j	chr5	-	36636602	36725173	MSTRG.25927.2	4	28142	MSTRG.25927	AC008957	0	3.97743	0	2.65959	0	0	0	0	inf	inf	6.36878e-06	0.00111623	up	yes
2288	o	chr1	-	16507438	16514285	MSTRG.347.6	2	464	MSTRG.347	RNU1-1	72.5204	161.531	48.9835	0	0.163794	0	0	0	1727.99	10.7549	6.55184e-06	0.00114173	up	yes
141862	o	chr21	-	8214778	8442701	MSTRG.21101.30	4	975	MSTRG.21101	FP671120	290.866	0	7.59364	0	0	0	0	0	inf	inf	1.09475e-05	0.00174749	up	yes
184890	j	chr6	+	22113306	22194893	MSTRG.27601.14	3	1069	MSTRG.27601	CASC15	1.70808	1.92728	1.92152	2.06486	0.011181	0.077332	0.108592	0	38.6684	5.27308	1.1112e-05	0.00176448	up	yes
140943	i	chr20	.	61752611	61753768	MSTRG.20881.1	1	1158	MSTRG.20881	CDH4	1.48215	1.30949	1.13688	1.94207	0.072962	0.064367	0.059935	0.129069	17.9896	4.16909	1.28823e-05	0.00193927	up	yes
135870	u	chr2	+	238560479	238561699	MSTRG.20105.1	2	1070	MSTRG.20105	.	1.23025	0.699167	0.969126	1.5416	0	0	0	0.044359	100.096	6.64523	1.96035e-05	0.00270979	up	yes
35976	j	chr11	+	65499056	65504463	MSTRG.5556.9	3	4841	MSTRG.5556	MALAT1	0	0	0	0	33.6033	0.319589	0	0	-inf	-inf	2.80666e-05	0.0035847	down	yes
3857	x	chr1	-	28493360	28508705	MSTRG.603.2	3	293	MSTRG.603	PHACTR4	0.038741	0.051469	0	0.062218	99.4729	0.05717	0.10208	6.46855	0.00143664	-9.44309	4.58773e-05	0.00508218	down	yes
107625	u	chr19	+	5548902	5555054	MSTRG.16339.4	3	4327	MSTRG.16339	.	0	0	0	0	0	3.90907	0	4.90478	-inf	-inf	4.84277e-05	0.00526753	down	yes
139128	j	chr20	+	37289638	37317260	MSTRG.20615.1	5	1513	MSTRG.20615	MANBAL	0	0	6.1685	9.24548	0	0	0	0	inf	inf	5.83617e-05	0.00600572	up	yes
160829	u	chr3	.	161879604	161881621	MSTRG.23740.1	1	2018	MSTRG.23740	.	0.048244	0.052725	0.01991	0.09943	0.655529	0.634543	1.26213	0.974012	0.0624775	-4.00052	8.14106e-05	0.0073109	down	yes
109436	j	chr19	-	11553047	11559236	MSTRG.16549.6	5	987	MSTRG.16549	ELOF1	0	0	0	0	11.1404	9.55856	0	0	-inf	-inf	8.21912e-05	0.00731689	down	yes
133426	j	chr2	+	207579003	207603431	MSTRG.19830.16	2	6579	MSTRG.19830	CREB1	1.3331	0.537455	0.005337	0.004702	0.004165	0.003529	0.003007	0.000563	166.956	7.38332	8.23118e-05	0.00731689	up	yes
221243	j	chr9	+	134025495	134030277	MSTRG.33432.3	4	3869	MSTRG.33432	BRD3OS	2.61563	0	1.57029	0	0	0	0	0	inf	inf	8.50534e-05	0.0074952	up	yes
70891	o	chr15	+	50355476	50371636	MSTRG.10826.7	2	15211	MSTRG.10826	GABPB1-AS1	0	0.000507	0.006699	0.000192	1.01111	0.713467	0.003276	0.00901	0.0042594	-7.87514	8.58879e-05	0.00752657	down	yes
226543	j	chrX	+	102769218	102912387	MSTRG.34228.5	11	2800	MSTRG.34228	LINC00630	0.000256	0.618337	0.297039	0.744685	0	0	0.005262	0	315.53	8.30163	8.83006e-05	0.00768457	up	yes
183938	u	chr6	.	3897949	3901956	MSTRG.27412.1	1	4008	MSTRG.27412	.	1.4027	1.33935	1.44737	1.23478	0.055479	0.137116	0.092355	0.094613	14.2906	3.837	9.76586e-05	0.00813662	up	yes
81035	o	chr16	-	29807137	29811192	MSTRG.12416.1	2	1026	MSTRG.12416	AC009133	22.7831	0	1.70081	0	0	0	0	0	inf	inf	9.95524e-05	0.00819744	up	yes
2278	o	chr1	+	16475443	16623988	MSTRG.350.1	3	256	MSTRG.350	AL137802	25.7732	0	0	21.1685	0	0	0	0	inf	inf	9.99382e-05	0.00819744	up	yes
174594	j	chr5	+	38556866	38566147	MSTRG.25942.2	2	2852	MSTRG.25942	LIFR-AS1	0.070652	0.008354	0.027377	0.045066	0.403093	2.00872	0.521742	0.565962	0.0432771	-4.53025	0.000100805	0.00822318	down	yes
201929	j	chr7	-	110663208	111276618	MSTRG.30387.3	4	2374	MSTRG.30387	IMMP2L	0	0	0	0	0	3.13428	0	1.88801	-inf	-inf	0.000118985	0.00887183	down	yes
100089	u	chr17	-	76606015	76611177	MSTRG.15209.5	2	628	MSTRG.15209	.	0	0	0	0	10.6799	5.1463	0	0	-inf	-inf	0.000125986	0.00904586	down	yes
169532	j	chr4	+	109815635	109824727	MSTRG.25073.3	6	906	MSTRG.25073	GAR1	0	0	0	0	1.71734	8.12997	0	0	-inf	-inf	0.000151526	0.0101142	down	yes
160830	u	chr3	.	161888415	161891838	MSTRG.23765.1	1	3424	MSTRG.23765	.	0.03172	0.107967	0.04673	0.057857	0.654722	0.567137	0.994963	1.46851	0.0662828	-3.91522	0.000161565	0.0104876	down	yes
215121	u	chr9	.	22468949	22473101	MSTRG.32338.1	1	4153	MSTRG.32338	.	1.05215	1.25	1.01314	1.22084	0.054882	0.069982	0.140729	0.09366	12.6266	3.65839	0.000163904	0.010572	up	yes
141809	o	chr21	-	8205942	8444842	MSTRG.21101.2	6	5119	MSTRG.21101	FP671120	28.318	218.457	9.82793	24.1822	8.22114	3.18826	2.60063	4.35708	15.2874	3.93427	0.000171614	0.0109466	up	yes
123855	i	chr2	-	58096709	58118790	MSTRG.18363.2	2	6995	MSTRG.18363	VRK2	0	0	0	0	0.5607	0	0.438533	0	-inf	-inf	0.000174382	0.0110704	down	yes
11760	o	chr1	+	147955855	148038904	MSTRG.1938.1	2	1157	MSTRG.1938	GPR89B	0.3743	0.432568	0.261164	0.377704	0.464074	114.863	0.50633	0.781416	0.0123976	-6.3338	0.000185306	0.0116785	down	yes
3855	x	chr1	-	28481490	28507532	MSTRG.603.1	2	315	MSTRG.603	PHACTR4	0.391448	0.519371	0.283451	0	161.577	0.108495	0.204027	50.44	0.00562461	-7.47403	0.000205348	0.0127342	down	yes
151453	j	chr3	+	20905501	21148083	MSTRG.22450.9	10	4062	MSTRG.22450	SGO1-AS1	0.000869	0	0	0	0.281085	0.22296	0	0.361441	0.00100406	-9.95994	0.00024169	0.0145102	down	yes
160819	u	chr3	+	161779346	161780824	MSTRG.23758.1	1	1479	MSTRG.23758	.	0.170301	0.174993	0.054333	0.146873	1.73472	1.69877	1.64111	1.61712	0.0816681	-3.61408	0.000243874	0.0145697	down	yes
156139	o	chr3	+	75415870	75421537	MSTRG.23013.2	2	2797	MSTRG.23013	ALG1L6P	0	1.42223	0	0.864361	0	0	0	0	inf	inf	0.000244168	0.0145697	up	yes
86467	j	chr16	-	86474529	86478881	MSTRG.13193.2	3	3036	MSTRG.13193	FENDRR	0	0	0.071819	0	0.490855	1.95271	1.28995	1.42001	0.0139359	-6.16505	0.000252145	0.0149753	down	yes
191131	i	chr6	-	112283735	112299234	MSTRG.28736.1	2	4080	MSTRG.28736	AL365214	2.65203	3.0741	3.1188	3.29973	0.203675	0.264126	0.292887	0.445938	10.065	3.33127	0.000285543	0.016634	up	yes
97857	j	chr17	-	62289336	62296893	MSTRG.14937.3	4	293	MSTRG.14937	AC053481	3.05232	0.587609	0	3.40819	0	0	0	0	inf	inf	0.000322026	0.0184413	up	yes
183728	u	chr6	-	1270765	1312072	MSTRG.27375.2	3	20772	MSTRG.27375	.	1.72653	2.31388	2.34669	2.44461	0.19163	0.286263	0.036299	0.437004	9.28484	3.21488	0.000384961	0.0212838	up	yes
193711	j	chr6	-	165898744	165987914	MSTRG.29177.33	2	4490	MSTRG.29177	PDE10A	0	0	0	0	0.587355	0.673989	0	0	-inf	-inf	0.000433498	0.0235183	down	yes
176053	j	chr5	-	70481051	70586156	MSTRG.26203.2	4	1216	MSTRG.26203	AC146944	0	0.005948	0.012751	0.01807	1.36742	0.626973	0.007133	0.849969	0.0128946	-6.27709	0.000479712	0.02548	down	yes
35984	j	chr11	+	65501960	65506465	MSTRG.5556.14	4	4102	MSTRG.5556	MALAT1	0	0	0.018367	0	0	85.7751	0	0.36779	0.000213216	-12.1954	0.000495005	0.0261553	down	yes
184384	j	chr6	+	10412878	10416921	MSTRG.27487.2	3	3641	MSTRG.27487	TFAP2A-AS1	0.001952	0.004903	0.000917	0.011331	0.230727	0.032158	0.270465	0.220034	0.0253563	-5.30151	0.000527619	0.0275698	down	yes
160824	u	chr3	.	161827581	161832576	MSTRG.23763.1	1	4996	MSTRG.23763	.	0.088567	0.069332	0.057123	0.172005	0.957238	0.670139	1.50097	1.45909	0.0843666	-3.56718	0.000529063	0.0275952	down	yes
116415	u	chr19	-	47238530	47244332	MSTRG.17437.1	2	1153	MSTRG.17437	.	1.25525	1.65448	1.55578	1.5918	0.119716	0.238905	0.156963	0.219989	8.23481	3.04174	0.000542216	0.0281846	up	yes
141838	o	chr21	-	8206428	8442703	MSTRG.21101.19	5	2946	MSTRG.21101	FP671120	0.406122	0.028199	0	0	276.893	0	167.153	0.12743	0.000977819	-9.99815	0.000576639	0.0293549	down	yes
11464	o	chr1	-	145462902	145465780	MSTRG.1880.1	2	1004	MSTRG.1880	RF00003	0	0	3.79402	0.843665	0	0	0	0	inf	inf	0.000582496	0.0295707	up	yes
56323	i	chr13	.	31957713	31958548	MSTRG.8561.1	1	836	MSTRG.8561	FRY	1.99042	2.16269	1.17102	1.60479	0.262454	0.04422	0.176835	0.175359	10.5164	3.39457	0.000584639	0.0296053	up	yes
141908	o	chr21	-	8389475	8438551	MSTRG.21101.53	3	1154	MSTRG.21101	FP236383	0	0.0003	0	1.98032	704.977	215.8	134.756	0	0.00187642	-9.0578	0.000684681	0.0334729	down	yes
218466	j	chr9	+	99222282	99238095	MSTRG.32962.2	5	447	MSTRG.32962	SEC61B	0	0	0	0	6.84678	0	3.27798	0	-inf	-inf	0.000739281	0.0353583	down	yes
118996	j	chr19	+	55006249	55043916	MSTRG.17666.4	3	1206	MSTRG.17666	AC011476	0	0	0	0	1.9803	0	0	1.6852	-inf	-inf	0.00075975	0.036014	down	yes
160821	u	chr3	.	161794455	161806123	MSTRG.23760.1	1	11669	MSTRG.23760	.	0.158367	0.109501	0.040672	0.12669	1.10107	0.671139	1.31629	1.28706	0.0994684	-3.32962	0.000771355	0.0364503	down	yes
98461	o	chr17	+	64932750	64962744	MSTRG.15010.1	2	2470	MSTRG.15010	AC103810	0.054957	0.040722	0.018023	0	0.030714	0.024634	3.95036	2.83177	0.0166292	-5.91014	0.00077849	0.0367304	down	yes
174454	j	chr5	-	36871364	36876700	MSTRG.25945.3	2	1821	MSTRG.25945	NIPBL-DT	0.863507	0	1.089	0	0	0	0	0	inf	inf	0.000865921	0.039896	up	yes
46559	u	chr12	-	47305465	47307899	MSTRG.7116.1	3	1679	MSTRG.7116	.	1.32833	1.22247	1.62871	1.73713	0	0	0.112312	0.162964	21.4935	4.42583	0.000870387	0.0400411	up	yes
224954	j	chrX	-	55143121	55161119	MSTRG.34002.3	4	1131	MSTRG.34002	FAM104B	0	0	0.002727	0	1.00598	0.018901	0.949932	0.001992	0.0013795	-9.50164	0.00088945	0.0407947	down	yes
160820	u	chr3	.	161783737	161786488	MSTRG.23759.1	1	2752	MSTRG.23759	.	0.172079	0.079583	0.146155	0.061444	0.988391	0.816857	1.46156	1.392	0.098579	-3.34258	0.000964999	0.0433124	down	yes
192662	u	chr6	+	144923454	144929945	MSTRG.28999.1	3	1040	MSTRG.28999	.	18.8397	19.1886	19.3586	20.5162	2.84428	3.57011	2.92154	2.37952	6.6496	2.73327	0.0010403	0.0460803	up	yes
168643	j	chr4	+	89681523	89694119	MSTRG.24911.12	4	6695	MSTRG.24911	AC097478	0.257124	0	0.169435	0	0	0	0	0	inf	inf	0.00122683	0.0524045	up	yes
67464	i	chr14	+	104944646	104952921	MSTRG.10279.1	2	356	MSTRG.10279	AHNAK2	1.98266	3.95439	1.18376	2.45254	0.169866	0.171072	0.135944	0.274888	12.7344	3.67066	0.0012919	0.054638	up	yes
131838	i	chr2	+	182347507	182380101	MSTRG.19539.3	1	32595	MSTRG.19539	PDE1A	0.343228	0.210182	0.586332	0.942937	3.38602	1.06648	4.96144	6.01732	0.134965	-2.88934	0.00146842	0.0599766	down	yes
11079	j	chr1	+	119149596	119184456	MSTRG.1790.9	3	6268	MSTRG.1790	WARS2-AS1	0.991952	0.200015	0.41214	0.020296	0.032105	0.042045	0.02628	0.038895	11.6591	3.54338	0.00191473	0.0726867	up	yes
183148	o	chr5	+	179552195	179556167	MSTRG.27292.1	2	2689	MSTRG.27292	RUFY1	0.020912	0	0.038769	0.032687	0.00964	1.54938	1.6722	0.017651	0.0284308	-5.1364	0.00191586	0.0726867	down	yes
141949	o	chr21	-	8401377	8446532	MSTRG.21101.67	2	1126	MSTRG.21101	FP236383	58.9623	0	0	100.023	0	0.314174	0.128685	0	358.997	8.48783	0.00196559	0.0740194	up	yes
141843	o	chr21	-	8209677	8260758	MSTRG.21101.21	3	1642	MSTRG.21101	FP671120	40.6772	0	1.5015	59.5248	0.428522	0	0	0	237.336	7.89078	0.00203085	0.0761645	up	yes
160825	u	chr3	.	161836180	161840138	MSTRG.23764.1	1	3959	MSTRG.23764	.	0.151698	0.085775	0.111061	0.200152	1.08725	0.828781	1.43381	1.16038	0.121654	-3.03914	0.00208149	0.0776626	down	yes
28368	u	chr10	+	130766153	130770843	MSTRG.4638.1	3	842	MSTRG.4638	.	2.1101	1.32245	2.0558	1.14949	0	0.170709	0.10211	0.274463	12.1287	3.60036	0.00220306	0.0809567	up	yes
92006	j	chr17	-	28901112	28903071	MSTRG.13970.5	3	568	MSTRG.13970	DHRS13	0	0	0	0	1.51088	0	0	1.6356	-inf	-inf	0.00248244	0.0889986	down	yes
50725	i	chr12	.	74364699	74366488	MSTRG.7699.1	1	1790	MSTRG.7699	AC090502	1.39545	1.13068	0.90948	1.22646	0.219631	0.112749	0.205327	0.225389	6.10942	2.61103	0.00285667	0.100482	up	yes
121115	u	chr2	.	16793102	16793375	MSTRG.17920.1	1	274	MSTRG.17920	.	0.764904	1.52837	0.247779	0.86297	3.06299	7.6983	8.06644	6.04341	0.136866	-2.86916	0.00291324	0.102295	down	yes
50727	i	chr12	.	74389769	74392232	MSTRG.7701.1	1	2464	MSTRG.7701	AC090502	1.4509	1.09695	0.747728	1.32712	0.056219	0.191627	0.155022	0.265584	6.91553	2.78984	0.00300961	0.104891	up	yes
170588	j	chr4	-	139289953	139301389	MSTRG.25295.10	5	647	MSTRG.25295	NDUFC1	0.220462	0	0.077768	0.387236	12.4125	1.01158	0.114884	1.63529	0.045173	-4.4684	0.00308	0.106916	down	yes
56322	i	chr13	.	31954969	31956248	MSTRG.8560.1	1	1280	MSTRG.8560	FRY	3.36713	3.59726	2.06417	2.11505	0.325306	0.328026	0.566197	0.51388	6.42873	2.68453	0.00330074	0.113549	up	yes
86470	i	chr16	-	86479092	86482594	MSTRG.13194.1	1	3503	MSTRG.13194	FENDRR	0.315047	0.304736	0.19202	0.223568	1.69406	1.52743	2.12154	2.14304	0.138306	-2.85406	0.00341093	0.116682	down	yes
55244	j	chr12	+	131861184	131864438	MSTRG.8377.2	3	881	MSTRG.8377	AC131009	2.20384	1.64496	1.0879	0.832503	0.258048	0.18678	0.130972	0.163843	7.79998	2.96347	0.00342497	0.116955	up	yes
34735	x	chr11	+	62026994	62086817	MSTRG.5406.1	2	801	MSTRG.5406	AP003733	2.36775	1.25998	1.47331	1.25545	0.152843	0.207101	0.303741	0.225258	7.15061	2.83807	0.00362089	0.12234	up	yes
109433	j	chr19	-	11553043	11559236	MSTRG.16549.3	6	1079	MSTRG.16549	ELOF1	0.518993	2.81133	0.408501	1.4859	0	0.112372	0	0.174045	18.2417	4.18917	0.00390729	0.130351	up	yes
182392	i	chr5	.	174338789	174341925	MSTRG.27194.1	1	3137	MSTRG.27194	LINC01411	1.57674	1.33516	1.14642	0.938965	0.163897	0.124744	0.252472	0.273421	6.13515	2.6171	0.00421863	0.138345	up	yes
34736	u	chr11	.	62029962	62030728	MSTRG.5407.1	1	767	MSTRG.5407	.	0.762751	1.46392	1.20244	0.984705	0.11955	0.108936	0.212638	0.061883	8.77485	3.13337	0.00427482	0.139625	up	yes
180880	j	chr5	+	148268794	148282364	MSTRG.27018.8	5	703	MSTRG.27018	SPINK13	0.436159	0.617543	0.382078	0.684877	3.03511	2.39261	4.37972	3.60897	0.158064	-2.66141	0.00436223	0.141811	down	yes
86478	i	chr16	.	86503892	86505673	MSTRG.13195.1	1	1782	MSTRG.13195	FENDRR	0.475458	0.030726	0.12401	0.245946	1.94742	1.81487	1.6696	2.03751	0.117297	-3.09176	0.00437172	0.142027	down	yes
165445	u	chr4	+	24323536	24399534	MSTRG.24438.1	2	2302	MSTRG.24438	.	0.008436	0.008103	0.011326	0	0	0.027118	0.424166	1.07374	0.0182718	-5.77423	0.00463096	0.148811	down	yes
170329	i	chr4	.	128314481	128319515	MSTRG.25233.1	1	5035	MSTRG.25233	LINC02615	1.37583	1.67097	1.10081	1.11783	0.108553	0.121415	0.316164	0.296344	6.24995	2.64385	0.00466082	0.149424	up	yes
29812	o	chr11	-	4136803	4137956	MSTRG.4818.1	2	703	MSTRG.4818	RRM1-AS1	0.035066	2.05235	1.2661	0.951478	0	0.124124	0	0	34.683	5.11616	0.00487882	0.154943	up	yes
112264	i	chr19	+	23549693	23558885	MSTRG.16940.4	3	1188	MSTRG.16940	ZNF675	1.20991	0.052552	1.7474	0.04971	0.049414	0.040787	0.051499	0.057007	15.3974	3.94462	0.00491322	0.15571	up	yes
197259	j	chr7	-	45723788	45769022	MSTRG.29732.4	12	4044	MSTRG.29732	SEPT7P2	0	0.764722	0.881946	0	0.017224	0	0	0.005365	72.8969	6.18779	0.00514274	0.161553	up	yes
112094	u	chr19	+	21858445	21867436	MSTRG.16892.1	2	615	MSTRG.16892	.	0.593417	0.801263	0.250903	0.479674	3.03731	3.39283	2.522	3.69125	0.168092	-2.57267	0.00517899	0.162356	down	yes
183738	u	chr6	-	1419246	1424011	MSTRG.27371.1	2	712	MSTRG.27371	.	0.909986	1.49519	1.23009	0.813206	0	0.21969	0.064986	0.092631	11.7901	3.5595	0.0052256	0.163564	up	yes
160828	u	chr3	.	161869623	161870454	MSTRG.23739.1	1	832	MSTRG.23739	.	0.169403	0	0.096585	0.122403	1.31209	0.933991	1.25957	1.16848	0.0830937	-3.58912	0.00543667	0.168867	down	yes
174422	j	chr5	-	36283556	36301900	MSTRG.25925.5	2	6834	MSTRG.25925	RANBP3L	0.205558	0.251947	0.219007	0.231007	1.1642	1.70355	2.26176	0.697071	0.155755	-2.68265	0.00566966	0.174235	down	yes
57859	j	chr13	+	67101018	67156931	MSTRG.8843.3	3	1192	MSTRG.8843	AL160254	1.60483	1.87507	1.68246	2.47449	0	0.362603	0	0	21.0612	4.39652	0.0061259	0.186186	up	yes
159030	u	chr3	.	134325848	134326529	MSTRG.23453.1	1	682	MSTRG.23453	.	1.45449	0.996989	1.26309	1.12566	0.067705	0.052002	0.135689	0.338353	8.15198	3.02715	0.00660643	0.197339	up	yes
18474	u	chr1	.	218594819	218595132	MSTRG.2935.1	1	314	MSTRG.2935	.	1.56846	0.722842	0.324889	1.69098	5.50365	8.551	5.68212	6.58585	0.16363	-2.61149	0.00691982	0.204789	down	yes
140355	x	chr20	+	51366840	51409297	MSTRG.20797.1	4	552	MSTRG.20797	NFATC2	2.32323	2.09073	1.3271	0.558812	0	0	0.304613	0	20.6816	4.37027	0.00754004	0.219934	up	yes
182387	j	chr5	+	174336231	174362711	MSTRG.27193.1	2	3776	MSTRG.27193	LINC01411	0.83002	0.932384	1.50807	1.21852	0.197422	0.123641	0.197872	0.317046	5.36973	2.42485	0.00765678	0.222273	up	yes
37884	j	chr11	-	73677908	73761017	MSTRG.5796.7	8	1171	MSTRG.5796	RAB6A	5.62954	4.47736	2.6725	8.78032	1.51327	0.036058	0.002592	0.308744	11.5871	3.53445	0.00788998	0.227522	up	yes
140425	i	chr20	.	52997729	52998990	MSTRG.20810.1	1	1262	MSTRG.20810	TSHZ2	0.228885	0.242776	0.211461	0.28086	1.05341	0.751145	1.63896	1.61831	0.190441	-2.39258	0.00796726	0.229158	down	yes
227150	u	chrX	.	117284336	117284584	MSTRG.34323.1	1	249	MSTRG.34323	.	1.99153	1.21564	0.9882	2.42148	10.7781	9.40587	7.84402	9.10601	0.178189	-2.48852	0.00822465	0.234835	down	yes
100090	u	chr17	-	76606015	76611214	MSTRG.15209.3	1	5200	MSTRG.15209	.	0.004581	0.018134	16.1424	0.072007	0.000868	0.001392	0.317184	0.00072	50.7149	5.66434	0.00935708	0.259139	up	yes
170349	u	chr4	.	128576608	128580075	MSTRG.25242.1	1	3468	MSTRG.25242	.	1.4671	1.62902	1.17665	1.3049	0.182484	0.227842	0.285433	0.41258	5.03246	2.33126	0.00968515	0.265992	up	yes
65926	j	chr14	-	93237550	93246569	MSTRG.10103.1	2	5631	MSTRG.10103	BTBD7	0.158469	0.003862	2.65799	0.002519	0.017618	0.007526	0.102463	0.007741	20.8561	4.3824	0.00972418	0.266394	up	yes
218236	j	chr9	-	96887221	96972949	MSTRG.32917.1	8	11336	MSTRG.32917	MFSD14C	0.236132	0.003192	0.008556	0.335137	0.022074	0.006886	0.023952	0.004466	10.161	3.34497	0.010548	0.28173	up	yes
222348	u	chrX	+	4540517	4545981	MSTRG.33599.1	1	5465	MSTRG.33599	.	56.2661	54.5871	46.7431	57.6633	189.713	224.636	196.374	201.489	0.265029	-1.91578	0.0110413	0.291069	down	yes
170343	u	chr4	.	128534692	128540502	MSTRG.25236.1	1	5811	MSTRG.25236	.	1.27369	1.30332	0.943414	1.32029	0.206035	0.110839	0.260051	0.41034	4.90315	2.29371	0.0113531	0.297356	up	yes
215125	u	chr9	.	22481657	22482423	MSTRG.32342.1	1	767	MSTRG.32342	.	1.31426	1.26115	1.1038	1.39945	0.060202	0.165755	0.271467	0.361862	5.91032	2.56324	0.0119715	0.30923	up	yes
109431	j	chr19	-	11553043	11559230	MSTRG.16549.2	5	993	MSTRG.16549	ELOF1	0	17.7728	0	20.7642	0.28952	0	0	0	133.107	7.05644	0.0119742	0.30923	up	yes
86619	i	chr16	.	87802945	87804332	MSTRG.13220.1	1	1388	MSTRG.13220	AC126696	1.31145	0.994718	1.42325	1.34101	0.20904	0.223033	0.2869	0.457403	4.31021	2.10776	0.0120434	0.310625	up	yes
50726	i	chr12	-	74373282	74374071	MSTRG.7700.1	1	790	MSTRG.7700	AC090502	1.11599	1.01651	0.440678	1.34015	0.233796	0	0.05857	0.120163	9.48617	3.24583	0.0122227	0.313913	up	yes
169346	j	chr4	-	106304663	106316253	MSTRG.25049.21	3	652	MSTRG.25049	TBCK	2.67544	0	3.50049	0	0	0.043545	0	0.070955	53.9383	5.75324	0.0122942	0.314953	up	yes
98312	j	chr17	-	64377888	64391513	MSTRG.14975.10	2	6213	MSTRG.14975	PECAM1	0.26733	0.162503	0.160155	0.216952	0.561329	0.593026	2.00457	1.46306	0.174587	-2.51798	0.0124814	0.318773	down	yes
63438	j	chr14	-	61294712	61322794	MSTRG.9708.1	4	1764	MSTRG.9708	AL359220	2.36379	3.29093	3.72492	3.72388	0.727094	0.810693	0.794537	0.373474	4.84276	2.27583	0.0126681	0.321955	up	yes
183725	u	chr6	.	1252710	1257163	MSTRG.27373.1	1	4454	MSTRG.27373	.	1.31754	1.20951	0.420479	1.38709	0.213696	0.157497	0.24177	0.274727	4.88303	2.28778	0.0129915	0.327708	up	yes
183727	x	chr6	-	1270764	1312100	MSTRG.27375.1	3	40304	MSTRG.27375	FOXQ1	2.91938	2.77494	2.51636	3.81184	0.857927	0.710502	0.940928	1.03914	3.38806	1.76046	0.0130115	0.327804	up	yes
128583	u	chr2	+	127400591	127406434	MSTRG.19039.1	2	785	MSTRG.19039	.	1.24112	1.01482	1.73698	1.61809	0.081739	0.171639	0.286771	0.455002	5.63835	2.49527	0.0135163	0.336757	up	yes
23867	o	chr10	+	61909465	61954275	MSTRG.3874.1	2	17777	MSTRG.3874	ARID5B	0.455998	0.536541	0.277281	0.4931	1.59938	1.48309	1.89555	2.25336	0.243787	-2.0363	0.0137774	0.34061	down	yes
182393	i	chr5	.	174356839	174357641	MSTRG.27195.1	1	803	MSTRG.27195	LINC01411	1.00329	1.66958	0.472506	1.09259	0.194327	0.104613	0.083367	0.295124	6.25594	2.64523	0.0139035	0.342476	up	yes
178075	j	chr5	-	111496033	111512510	MSTRG.26591.1	5	4843	MSTRG.26591	STARD4	1.29732	1.17714	1.15863	0.182772	0.11703	0.234087	0.229362	0.157598	5.17	2.37016	0.0144585	0.35201	up	yes
59042	j	chr13	+	109265430	109278518	MSTRG.9097.3	3	9373	MSTRG.9097	AL161431	10.7633	1.38291	1.35934	3.05298	0.72388	0.996175	1.16763	0.917978	4.35102	2.12135	0.0153694	0.368713	up	yes
128584	u	chr2	-	127406743	127408945	MSTRG.19027.1	2	1571	MSTRG.19027	.	1.32947	0.873247	1.38634	1.32873	0.366515	0.373703	0.157498	0.255492	4.26444	2.09236	0.0155441	0.371305	up	yes
161229	u	chr3	.	171580600	171581140	MSTRG.23831.1	1	541	MSTRG.23831	.	1.09894	1.97241	0.454341	1.59764	2.34953	6.61638	7.42605	12.4111	0.177874	-2.49107	0.0156237	0.372769	down	yes
163606	u	chr3	.	197478893	197479586	MSTRG.24162.1	1	694	MSTRG.24162	.	1.41235	1.68505	1.007	0.734861	0.130945	0.244254	0	0.23428	7.94	2.98914	0.0156728	0.373353	up	yes
24216	j	chr10	+	69258871	69267552	MSTRG.3946.3	5	1553	MSTRG.3946	HKDC1	0.036786	0.584784	0.059726	0.627108	0	0.021759	0	0.066881	14.7609	3.88371	0.0164894	0.388997	up	yes
86476	j	chr16	-	86490226	86508877	MSTRG.13193.9	4	3279	MSTRG.13193	FENDRR	0.178728	0.207956	0.101722	0.141398	0.066084	0.983681	1.22916	1.55708	0.164182	-2.60663	0.0172065	0.401093	down	yes
83673	i	chr16	.	65230886	65231621	MSTRG.12745.1	1	736	MSTRG.12745	AC009055	10.7611	13.4036	9.14549	12.6411	38.3972	46.4325	47.7646	42.765	0.262041	-1.93213	0.0176718	0.40896	down	yes
133793	u	chr2	.	215926597	215927099	MSTRG.19882.1	1	503	MSTRG.19882	.	0.509152	0	0	0	2.02574	0	7.54771	5.13948	0.0346057	-4.85284	0.017696	0.409054	down	yes
12001	i	chr1	.	149630902	149631956	MSTRG.1983.1	1	1055	MSTRG.1983	LINC00869	1.64598	1.19735	1.22352	1.55737	0.240825	0.429749	0.413902	0.38462	3.82836	1.93673	0.0179265	0.412343	up	yes
170342	u	chr4	.	128526440	128529712	MSTRG.25235.1	1	3273	MSTRG.25235	.	1.20018	1.21188	0.736209	1.40144	0.184952	0.188018	0.37939	0.299857	4.32393	2.11234	0.0179754	0.412623	up	yes
57856	i	chr13	+	67018788	67024463	MSTRG.8842.1	2	5105	MSTRG.8842	PCDH9	1.60957	1.58697	1.1074	1.49036	0.289279	0.16052	0.479581	0.41887	4.29765	2.10355	0.0180604	0.413703	up	yes
174224	j	chr5	-	34182699	34245279	MSTRG.25900.4	4	1063	MSTRG.25900	AC138409	0.093796	0.013913	0.018281	0.692832	0.802557	1.00999	1.99726	2.10553	0.138424	-2.85284	0.018299	0.417633	down	yes
103524	u	chr18	-	28177178	28177827	MSTRG.15721.1	1	650	MSTRG.15721	.	15.19	11.6809	11.1474	9.23421	2.33026	3.19766	3.31559	2.58477	4.1347	2.04778	0.0194359	0.43698	up	yes
160812	u	chr3	-	161601279	161624757	MSTRG.23753.1	1	23479	MSTRG.23753	.	0.39099	0.326653	0.270346	0.360363	0.478765	1.4062	0.720045	3.24648	0.230429	-2.11761	0.020222	0.449211	down	yes
170327	i	chr4	.	128295572	128299463	MSTRG.25231.1	1	3892	MSTRG.25231	LINC02615	1.27615	1.64901	1.00116	1.43911	0.315701	0.244258	0.363653	0.364476	4.16542	2.05846	0.0203257	0.45082	up	yes
34737	u	chr11	.	62033223	62035024	MSTRG.5408.1	1	1802	MSTRG.5408	.	0.981106	1.19836	1.25322	1.66183	0.446787	0.209737	0.350464	0.239113	4.08836	2.03152	0.0203489	0.450855	up	yes
133630	u	chr2	.	210684498	210690768	MSTRG.19851.1	1	6271	MSTRG.19851	.	0.326591	0.322526	0.2392	0.307005	1.37426	1.15623	1.35428	1.49273	0.222283	-2.16953	0.0204868	0.452739	down	yes
67494	u	chr14	.	105084428	105086245	MSTRG.10273.1	1	1818	MSTRG.10273	.	0.653325	1.09298	0.893278	1.31575	0.32667	0.135976	0.292597	0.263486	3.88261	1.95703	0.0207044	0.455894	up	yes
193536	i	chr6	.	160365187	160366001	MSTRG.29167.1	1	815	MSTRG.29167	SLC22A3	0.956301	1.67096	1.56657	2.00497	0.113312	0.343885	0.206557	0.661479	4.67752	2.22575	0.0208134	0.457465	up	yes
98318	i	chr17	.	64401742	64403335	MSTRG.14980.1	1	1594	MSTRG.14980	PECAM1	0.113076	0.25287	0.296311	0.47512	1.18922	0.894212	1.72858	1.32697	0.221323	-2.17577	0.0208373	0.457826	down	yes
112309	j	chr19	+	24033426	24069154	MSTRG.16952.5	5	6055	MSTRG.16952	AC092279	0.123388	0.213254	0.309053	1.80131	0.031626	0.136997	0.174063	0.09152	5.63558	2.49456	0.0224142	0.48287	up	yes
48667	j	chr12	-	55725448	55729220	MSTRG.7383.3	7	1203	MSTRG.7383	CD63	0.581349	0.35514	0.381765	0.99736	14.2277	0.517008	0.792089	0.904829	0.140839	-2.82788	0.0231325	0.492766	down	yes
229425	u	chrY	.	5945077	5945396	MSTRG.34652.1	1	320	MSTRG.34652	.	0.825685	0.39563	0.348763	0.569584	1.99704	3.80858	2.92223	2.9552	0.183142	-2.44896	0.0231741	0.493308	down	yes
215443	i	chr9	-	33581776	33590447	MSTRG.32430.3	2	2485	MSTRG.32430	CYP4F26P	0.092219	0	0.251246	0	0.832936	1.039	1.39652	0.234539	0.0980488	-3.35036	0.0232366	0.494292	down	yes
98315	i	chr17	.	64391728	64395730	MSTRG.14977.1	1	4003	MSTRG.14977	PECAM1	0.340536	0.275791	0.291899	0.297486	1.24795	1.23731	1.58126	1.24181	0.227136	-2.13837	0.0239007	0.504011	down	yes
57861	o	chr13	+	67116317	67141670	MSTRG.8843.4	2	21743	MSTRG.8843	AL160254	1.67652	1.95427	1.42428	1.89237	0.513607	0.445957	0.608923	0.63337	3.15527	1.65776	0.0243341	0.511377	up	yes
187018	o	chr6	+	32894175	32904220	MSTRG.27967.1	2	4153	MSTRG.27967	HLA-Z	0.209721	0.193059	0.237934	0.210159	2.06723	2.35349	0.184167	0.219713	0.176362	-2.50339	0.0252031	0.522732	down	yes
17571	i	chr1	.	205448623	205449691	MSTRG.2802.1	1	1069	MSTRG.2802	LEMD1	0.277896	0.235752	0.36173	0.205739	0.844894	1.42187	1.80578	0.872098	0.218644	-2.19334	0.0256927	0.52932	down	yes
77666	j	chr16	+	2883215	2905418	MSTRG.11893.2	5	4275	MSTRG.11893	FLYWCH2	0.819131	5.41276	0.466275	0.653219	7.54812	9.28688	7.26479	8.47314	0.22569	-2.14759	0.0264961	0.539837	down	yes
11969	x	chr1	-	149202568	149205896	MSTRG.1972.2	1	3329	MSTRG.1972	AC245297	1.3085	1.66677	0.85386	1.42072	0.276204	0.180138	0.466334	0.410316	3.9384	1.97761	0.0266366	0.541454	up	yes
160870	i	chr3	+	165498131	165517462	MSTRG.23774.8	3	3987	MSTRG.23774	LINC01322	2.068	2.5088	1.29919	1.91162	0.078593	0	0.400542	0.68701	6.67808	2.73943	0.0266671	0.541688	up	yes
199947	u	chr7	.	93398176	93398511	MSTRG.30117.1	1	336	MSTRG.30117	.	0	0.747976	0	0	1.11522	2.95091	4.08806	2.33547	0.071306	-3.80983	0.0271003	0.547167	down	yes
11193	j	chr1	-	120327217	120342716	MSTRG.1802.4	2	2075	MSTRG.1802	AC244669	1.68865	1.69155	1.51137	1.28443	0.366312	0.202939	0.488222	0	5.84033	2.54605	0.0271909	0.54848	up	yes
215127	u	chr9	.	22514637	22515738	MSTRG.32361.1	1	1102	MSTRG.32361	.	0.673205	1.47734	1.16104	1.34223	0.293157	0.179187	0.209937	0.507382	3.91188	1.96786	0.0274488	0.552218	up	yes
202354	j	chr7	-	120853582	120858323	MSTRG.30464.8	4	2195	MSTRG.30464	TSPAN12	0.270712	0.433816	0.289725	0.519274	1.65805	2.67774	1.34517	0.900521	0.229967	-2.1205	0.0280157	0.559917	down	yes
67495	j	chr14	+	105087648	105099004	MSTRG.10274.1	4	5878	MSTRG.10274	LINC02298	1.56636	1.43015	1.58239	1.24409	0.486824	0.399104	0.340471	0.337635	3.72305	1.89649	0.028789	0.57028	up	yes
17568	i	chr1	.	205442032	205444326	MSTRG.2799.1	1	2295	MSTRG.2799	LEMD1	0.335087	0.345511	0.287132	0.267705	1.06435	1.17609	1.54562	1.27646	0.244036	-2.03484	0.0291228	0.574497	down	yes
147140	i	chr22	-	31238279	31244177	MSTRG.21833.1	2	1488	MSTRG.21833	LIMK2	1.72068	0.845148	1.66312	1.79338	0.343903	0.217071	0.504738	0.56668	3.68927	1.88333	0.0294008	0.577914	up	yes
227036	u	chrX	.	112535165	112535426	MSTRG.34300.1	1	262	MSTRG.34300	.	3.33075	3.58985	6.02764	4.74363	15.4875	22.3353	20.758	15.8337	0.237748	-2.0725	0.0300908	0.587044	down	yes
136511	i	chr20	-	392680	393926	MSTRG.20177.1	1	1247	MSTRG.20177	TRIB3	1.78406	2.10306	2.00088	2.25717	0.284412	0.772232	0.797232	0.298968	3.78344	1.9197	0.0304092	0.590672	up	yes
98317	i	chr17	-	64399377	64400699	MSTRG.14979.1	1	1323	MSTRG.14979	PECAM1	0.077233	0.288378	0.146249	0.180093	0.582435	0.706971	1.49344	0.62707	0.202923	-2.30099	0.0311606	0.601049	down	yes
7594	i	chr1	+	61106991	61114912	MSTRG.1182.2	2	7116	MSTRG.1182	NFIA	0.073857	0.035719	0.02082	0.028891	0.368539	0.030136	0.1121	0.282566	0.20078	-2.31631	0.0313582	0.602902	down	yes
48479	x	chr12	+	54395346	54397804	MSTRG.7404.2	2	309	MSTRG.7404	ITGA5	4.1197	6.9841	9.11027	7.11247	1.01633	1.62994	2.45728	2.57414	3.55921	1.83156	0.032931	0.620489	up	yes
133516	u	chr2	.	209083120	209083560	MSTRG.19834.1	1	441	MSTRG.19834	.	0.528007	0.171706	0.22745	0.532689	1.26462	2.61002	2.29114	1.45508	0.19156	-2.38413	0.0332791	0.62478	down	yes
96346	u	chr17	-	49129238	49129616	MSTRG.14683.1	1	379	MSTRG.14683	.	2.21149	2.14344	3.39469	3.16433	1.31122	0.384613	0.427296	0.306427	4.49217	2.16741	0.0333801	0.625794	up	yes
210333	i	chr8	.	89698165	89698883	MSTRG.31584.1	1	719	MSTRG.31584	AF117829	0.576651	0.711558	1.19483	2.24763	0	0.281743	0.160883	0.328198	6.13715	2.61757	0.0335773	0.628717	up	yes
170344	u	chr4	.	128541772	128545315	MSTRG.25237.1	1	3544	MSTRG.25237	.	0.721799	0.954252	0.766912	1.35764	0.220291	0.129202	0.372926	0.307418	3.69049	1.88381	0.0338146	0.631902	up	yes
7313	u	chr1	.	55027154	55027760	MSTRG.1131.1	1	607	MSTRG.1131	.	1.48036	1.76287	1.23138	1.49455	4.91578	7.26608	5.64434	5.86696	0.251936	-1.98887	0.0339375	0.63351	down	yes
85911	i	chr16	-	80925656	80933588	MSTRG.13147.2	2	1604	MSTRG.13147	AC009070	0.150384	0.025639	0.091174	0.210123	1.50093	1.53586	0.141839	0.054795	0.14762	-2.76004	0.0340871	0.635622	down	yes
215129	u	chr9	.	22520163	22521478	MSTRG.32363.1	1	1316	MSTRG.32363	.	1.46207	1.11273	0.881943	0.659896	0.277711	0.218107	0.308706	0.428072	3.33981	1.73977	0.0345522	0.640659	up	yes
173246	u	chr5	.	5519519	5519741	MSTRG.25703.1	1	223	MSTRG.25703	.	2.31184	5.42036	2.06116	3.03166	11.3837	14.1684	12.7875	12.4897	0.252315	-1.9867	0.0351938	0.648011	down	yes
162862	u	chr3	.	191896184	191896503	MSTRG.24053.1	1	320	MSTRG.24053	.	0.79448	1.1828	1.25204	1.32041	4.72594	5.39803	3.66048	3.03858	0.270446	-1.88659	0.0356322	0.651559	down	yes
50728	i	chr12	.	74398221	74399355	MSTRG.7702.1	1	1135	MSTRG.7702	AC090502	1.31749	0.87808	0.412374	0.576692	0.216108	0.081427	0.079654	0.319572	4.57063	2.19239	0.0359307	0.655544	up	yes
227211	i	chrX	.	119318688	119318920	MSTRG.34338.1	1	233	MSTRG.34338	AC004835	1.40225	1.23495	1.15268	0.676823	5.39265	3.65695	5.70048	5.01507	0.225989	-2.14568	0.0360477	0.656775	down	yes
143442	i	chr21	.	38438761	38439493	MSTRG.21297.1	1	733	MSTRG.21297	ERG	0.206174	0	0.354546	0.178724	1.56681	1.36643	1.38336	0.560048	0.151629	-2.72138	0.0361844	0.657275	down	yes
171197	i	chr4	+	151314527	151318140	MSTRG.25435.1	1	3614	MSTRG.25435	SH3D19	0	0.000269	0.142574	0	0.659304	1.37465	0.351713	0	0.0598754	-4.06189	0.0363683	0.659238	down	yes
120504	u	chr2	+	6187011	6199791	MSTRG.17837.1	2	930	MSTRG.17837	.	2.01896	1.70807	0.993893	1.26162	0	0.147563	0.531068	0.576426	4.76675	2.25301	0.0380874	0.681083	up	yes
222609	u	chrX	.	12943774	12944728	MSTRG.33652.1	1	955	MSTRG.33652	.	0.473486	0.737671	0.625037	1.16476	2.85991	2.52438	3.47135	2.59802	0.262008	-1.93232	0.0390033	0.691766	down	yes
112344	i	chr19	+	27774918	27775748	MSTRG.16969.1	1	831	MSTRG.16969	LINC00662	1.91726	1.90888	1.37216	2.41706	0.609642	0.708887	0.417599	0.608437	3.2481	1.69959	0.0393748	0.69485	up	yes
160884	u	chr3	.	166425414	166426811	MSTRG.23776.1	1	1398	MSTRG.23776	.	0.324303	0.387069	0.186813	0.33539	1.07298	0.790296	0.824028	1.75464	0.277711	-1.84835	0.0398212	0.699639	down	yes
57857	o	chr13	+	67100932	67157258	MSTRG.8843.1	3	1684	MSTRG.8843	AL160254	2.13881	1.98111	1.90075	2.72958	0.624413	0.863629	0.293331	0.655457	3.59083	1.84432	0.0399718	0.700602	up	yes
141670	o	chr21	-	6322664	6732072	MSTRG.21001.1	2	6034	MSTRG.21001	CBSL	0.448908	1.36591	2e-06	0.025972	0.03281	0.049965	0.114613	0	9.32573	3.22122	0.0419342	0.723493	up	yes
33542	i	chr11	-	49324517	49326565	MSTRG.5317.2	2	534	MSTRG.5317	AC118942	0.358331	0.244825	0.135275	0.201459	1.91409	1.55873	0.434627	1.01083	0.191102	-2.38759	0.0419852	0.723963	down	yes
53574	i	chr12	.	116154817	116155848	MSTRG.8153.1	1	1032	MSTRG.8153	MED13L	1.68855	0.964401	1.16869	1.98243	0.422678	0.188283	0.383485	0.783176	3.26508	1.70712	0.042781	0.731052	up	yes
140428	i	chr20	.	53017856	53019058	MSTRG.20813.1	1	1203	MSTRG.20813	TSHZ2	0.265354	0.223211	0.033399	0.2431	0.908125	0.416478	0.913409	1.39771	0.21043	-2.24859	0.0429363	0.732265	down	yes
222351	u	chrX	.	4895886	4896651	MSTRG.33601.1	1	766	MSTRG.33601	.	1.84526	2.79923	2.06115	3.70516	8.98011	10.2772	10.1921	9.1112	0.269985	-1.88905	0.0437617	0.740338	down	yes
105072	i	chr18	.	58618883	58621981	MSTRG.15989.1	1	3099	MSTRG.15989	ALPK2	0.459529	0.645131	0.333739	0.365853	1.86307	1.56571	1.68218	1.64924	0.266893	-1.90566	0.0445109	0.746971	down	yes
128102	u	chr2	-	113323972	113326138	MSTRG.18948.1	2	1179	MSTRG.18948	.	0.170908	0.342084	0.398514	0.871113	1.6271	1.48983	1.59268	1.82812	0.272667	-1.87479	0.044626	0.74756	down	yes
222350	u	chrX	.	4894209	4894869	MSTRG.33600.1	1	661	MSTRG.33600	.	4.48264	3.42232	3.73141	4.41583	14.4914	15.6795	12.4539	15.2462	0.277379	-1.85007	0.0453373	0.755418	down	yes
170970	i	chr4	.	145702143	145702514	MSTRG.25353.1	1	372	MSTRG.25353	C4orf51	0	0	0.512658	1.97573	4.10327	2.05689	9.77588	2.27452	0.136645	-2.87149	0.0453812	0.755943	down	yes
193537	j	chr6	+	160446709	160452941	MSTRG.29166.3	3	2838	MSTRG.29166	SLC22A3	1.06432	0.189065	0.382529	0.263578	0.063269	0.27221	0.058829	0.109843	3.7677	1.91368	0.0459207	0.761006	up	yes
107624	u	chr19	+	5548902	5553151	MSTRG.16339.5	3	1224	MSTRG.16339	.	0	0	0.595413	0.227338	1.5494	7.38258	2.46767	0	0.0721733	-3.79239	0.0459977	0.761469	down	yes
46808	i	chr12	-	48346221	48346703	MSTRG.7145.1	1	483	MSTRG.7145	ZNF641	0.277754	0.846182	0.819183	1.17929	1.7486	2.54444	3.78602	3.44083	0.271046	-1.88339	0.0461797	0.763182	down	yes
136507	i	chr20	.	379319	380571	MSTRG.20176.1	1	1253	MSTRG.20176	TRIB3	1.24432	1.52275	1.29391	0.829808	0.56427	0.511876	0.183327	0.234536	3.2736	1.71088	0.0464182	0.765619	up	yes
84810	i	chr16	+	69716721	69717610	MSTRG.12903.1	1	890	MSTRG.12903	NQO1	0.113203	0.816561	0.495476	0.462003	1.11067	2.14541	1.78661	1.84917	0.273836	-1.86861	0.0473403	0.774604	down	yes
184477	i	chr6	.	10796868	10798055	MSTRG.27518.1	1	1188	MSTRG.27518	AL024498	1.04234	0.868161	0.75965	1.76048	0.537393	0.059832	0.260481	0.408031	3.50044	1.80753	0.0479833	0.7832	up	yes
183140	u	chr5	-	179538439	179540956	MSTRG.27286.1	2	949	MSTRG.27286	.	0.991999	1.33395	1.62838	1.20243	0.545398	0.403181	0.200386	0.416437	3.29421	1.71993	0.0487642	0.791484	up	yes
67466	i	chr14	+	104945636	104951975	MSTRG.10278.5	5	895	MSTRG.10278	AHNAK2	5.52267	4.46637	7.00758	7.3279	2.04685	2.36418	0.294092	1.87968	3.69404	1.8852	0.0487856	0.79162	up	yes
61870	u	chr14	.	35335142	35336688	MSTRG.9375.1	1	1547	MSTRG.9375	.	0.597683	0.442413	0.219844	0.776364	1.69974	2.23395	1.65648	1.92499	0.27096	-1.88385	0.0488977	0.793016	down	yes
