# Supplementary material for: Comprehensive analysis of TGF-β-induced mRNAs and ncRNAs in hepatocellular carcinoma
Source: Aging (Albany NY). 2020 Oct 4;12(19):19399–420. doi: 10.18632/aging.103826 (PMC7732333; doi:10.18632/aging.103826)
Supplement: Supplementary Table 2 [file aging-12-103826-s003..xlsx]

## Sheet: Sheet1
Supplementary Table 2. Differentially expressed mRNAs upon treatment with TGF-β.
start	end	t_name	num_exons	length	gene_id	gene_name	GO	KEGG	KO_ENTRY	EC	Description	FPKM.TGFB_1	FPKM.TGFB_2	FPKM.TGFB_3	FPKM.TGFB_4	FPKM.DMSO_1	FPKM.DMSO_2	FPKM.DMSO_3	FPKM.DMSO_4	fc	log2(fc)	pval	qval	regulation	significant
90256528	90272624	MSTRG.10041.2	10	1829	MSTRG.10041	PSMC1	NA	NA	NA	NA	NA	0.01836	0.02487	0.046539	0.03509	21.8822	21.8839	20.8048	16.4176	0.00154169	-9.34127	9.02294e-16	5.48748e-11	down	yes
43053755	43075864	MSTRG.21344.7	18	2002	MSTRG.21344	CBS	NA	NA	NA	NA	NA	10.1162	7.57219	8.65948	5.10123	0	0	0	0	inf	inf	9.5475e-15	1.97447e-10	up	yes
39009866	39038076	ENST00000625998	12	5102	MSTRG.8609	PROSER1	NA	NA	NA	NA	proline and serine rich 1 [Source:HGNC Symbol;Acc:HGNC:20291]	1.11353	5.08259	3.98355	4.53113	0	0	0	0	inf	inf	9.73973e-15	1.97447e-10	up	yes
40580958	40606619	ENST00000378438	9	2022	MSTRG.33841	ATP6AP2	GO:0002003(angiotensin maturation);GO:0003824(catalytic activity);GO:0005515(protein binding);GO:0005615(extracellular space);GO:0005886(plasma membrane);GO:0009897(external side of plasma membrane);GO:0016020(membrane);GO:0016021(integral component of membrane);GO:0016324(apical plasma membrane);GO:0021903(rostrocaudal neural tube patterning);GO:0030177(positive regulation of Wnt signaling pathw…	04614(Renin-angiotensin system)	K19514	NA	ATPase H+ transporting accessory protein 2 [Source:HGNC Symbol;Acc:HGNC:18305]	0	0	0	0	8.36934	4.5442	9.61247	7.3465	-inf	-inf	2.60224e-14	3.95651e-10	down	yes
923928	944574	MSTRG.34.1	13	3702	MSTRG.34	SAMD11	NA	NA	NA	NA	NA	2.4374	3.74232	2.43101	5.83567	0	0	0	0	inf	inf	7.82033e-14	9.51218e-10	up	yes
143603913	143609557	MSTRG.32071.2	5	2441	MSTRG.32071	PYCR3	NA	NA	NA	NA	NA	0	0	0	0	7.75422	1.61466	7.23372	6.08487	-inf	-inf	3.78221e-13	3.83371e-09	down	yes
30063130	30083153	ENST00000520303	5	1803	MSTRG.31156	SARAF	GO:0005515(protein binding);GO:0005783(endoplasmic reticulum);GO:0005789(endoplasmic reticulum membrane);GO:0006811(ion transport);GO:0006816(calcium ion transport);GO:0016020(membrane);GO:0016021(integral component of membrane);GO:0030176(integral component of endoplasmic reticulum membrane);GO:0140268(endoplasmic reticulum-plasma membrane contact site);GO:2001256(regulation of store-operated ca…	NA	NA	NA	store-operated calcium entry associated regulatory factor [Source:HGNC Symbol;Acc:HGNC:28789]	0	0	0	0	3.78472	7.02119	9.98894	4.47828	-inf	-inf	5.58459e-13	4.51971e-09	down	yes
155002845	155018522	MSTRG.2196.10	6	3881	MSTRG.2196	ZBTB7B	NA	NA	NA	NA	NA	0	0	0	0	3.7332	3.13728	1.31283	3.46657	-inf	-inf	6.47663e-13	4.51971e-09	down	yes
7351889	7354939	ENST00000576980	1	3051	MSTRG.13533	KCTD11	GO:0005515(protein binding);GO:0005737(cytoplasm);GO:0007049(cell cycle);GO:0007275(multicellular organism development);GO:0007399(nervous system development);GO:0007406(negative regulation of neuroblast proliferation);GO:0016567(protein ubiquitination);GO:0016740(transferase activity);GO:0030154(cell differentiation);GO:0040008(regulation of growth);GO:0042127(regulation of cell population proli…	NA	K21920	EC:2.3.2.27	potassium channel tetramerization domain containing 11 [Source:HGNC Symbol;Acc:HGNC:21302]	1.94133	2.37284	5.66535	4.37767	0	0	0	0	inf	inf	6.68849e-13	4.51971e-09	up	yes
54046368	54102017	ENST00000618914	8	2482	MSTRG.31346	LYPLA1	GO:0002084(protein depalmitoylation);GO:0004622(lysophospholipase activity);GO:0005515(protein binding);GO:0005737(cytoplasm);GO:0005829(cytosol);GO:0006629(lipid metabolic process);GO:0006631(fatty acid metabolic process);GO:0008474(palmitoyl-(protein) hydrolase activity);GO:0016020(membrane);GO:0016021(integral component of membrane);GO:0016298(lipase activity);GO:0016787(hydrolase activity);GO…	00564(Glycerophospholipid metabolism);05231(Choline metabolism in cancer)	K06128	EC:3.1.1.5	lysophospholipase 1 [Source:HGNC Symbol;Acc:HGNC:6737]	0	0	0	0	5.08974	3.23545	4.80437	2.738	-inf	-inf	7.57513e-13	4.60696e-09	down	yes
169986597	170003784	ENST00000393704	2	5827	MSTRG.25557	MFAP3L	GO:0005515(protein binding);GO:0005634(nucleus);GO:0005737(cytoplasm);GO:0005886(plasma membrane);GO:0016020(membrane);GO:0016021(integral component of membrane)	NA	NA	NA	microfibril associated protein 3 like [Source:HGNC Symbol;Acc:HGNC:29083]	0	0	0	0	1.28722	1.51663	1.53346	1.17095	-inf	-inf	1.97904e-12	1.09417e-08	down	yes
24466531	24547843	ENST00000396445	13	5706	MSTRG.3550	KIAA1217	GO:0003674(molecular_function);GO:0005737(cytoplasm);GO:0007275(multicellular organism development);GO:0048706(embryonic skeletal system development)	NA	NA	NA	KIAA1217 [Source:HGNC Symbol;Acc:HGNC:25428]	0	0	0	0	1.6205	0.718319	1.74691	1.91046	-inf	-inf	2.72952e-12	1.35693e-08	down	yes
218264129	218270178	ENST00000444053	11	1804	MSTRG.19903	AAMP	GO:0001525(angiogenesis);GO:0005515(protein binding);GO:0005737(cytoplasm);GO:0005829(cytosol);GO:0005886(plasma membrane);GO:0007275(multicellular organism development);GO:0008201(heparin binding);GO:0009986(cell surface);GO:0010595(positive regulation of endothelial cell migration);GO:0014909(smooth muscle cell migration);GO:0015630(microtubule cytoskeleton);GO:0016020(membrane);GO:0030154(cell…	NA	NA	NA	angio associated migratory cell protein [Source:HGNC Symbol;Acc:HGNC:18]	0	0	0	0	4.23112	6.10789	3.18111	3.94046	-inf	-inf	3.04437e-12	1.35693e-08	down	yes
930312	944575	ENST00000341065	12	2191	MSTRG.34	SAMD11	GO:0003677(DNA binding);GO:0005515(protein binding);GO:0005634(nucleus)	NA	NA	NA	sterile alpha motif domain containing 11 [Source:HGNC Symbol;Acc:HGNC:28706]	0	0	0	0	2.92836	3.033	3.54007	3.90187	-inf	-inf	3.12363e-12	1.35693e-08	down	yes
9365226	9369304	MSTRG.21023.9	2	3725	MSTRG.21023	CR381653	NA	NA	NA	NA	NA	0	0	0	0	2.1931	1.23405	1.94266	3.58847	-inf	-inf	3.59912e-12	1.45925e-08	down	yes
141136626	141195511	ENST00000424248	21	4740	MSTRG.32014	DENND3	GO:0005085(guanyl-nucleotide exchange factor activity);GO:0005515(protein binding);GO:0005737(cytoplasm);GO:0005829(cytosol);GO:0008333(endosome to lysosome transport);GO:0017112(Rab guanyl-nucleotide exchange factor activity);GO:0044257(cellular protein catabolic process)	NA	K20162	NA	DENN domain containing 3 [Source:HGNC Symbol;Acc:HGNC:29134]	0	0	0	0	1.22997	1.29242	2.30008	1.32855	-inf	-inf	4.8072e-12	1.82725e-08	down	yes
138170320	138242349	MSTRG.25282.3	11	3298	MSTRG.25282	SLC7A11	NA	NA	NA	NA	NA	1.03256	1.42248	2.11047	2.26039	0	0	0	0	inf	inf	1.34288e-11	4.59259e-08	up	yes
149078951	149103731	MSTRG.2022.46	9	1939	MSTRG.2022	NBPF9	NA	NA	NA	NA	NA	3.55445	1.41453	3.41639	4.59977	0	0	0	0	inf	inf	1.35927e-11	4.59259e-08	up	yes
69996164	70065818	ENST00000529089	18	1580	MSTRG.12909	AC009022	NA	NA	NA	NA	novel transcript	0	0	0	0	2.65405	2.47587	3.3798	3.81132	-inf	-inf	1.77855e-11	5.68195e-08	down	yes
472661	543712	MSTRG.20191.4	14	7459	MSTRG.20191	CSNK2A1	NA	NA	NA	NA	NA	1.11578	1.62484	0.632839	0.379393	0	0	0	0	inf	inf	1.86854e-11	5.68195e-08	up	yes
31463182	31465704	ENST00000541196	2	2432	MSTRG.27906	HCP5	NA	NA	NA	NA	HLA complex P5 [Source:HGNC Symbol;Acc:HGNC:21659]	0	0	0	0	1.60306	1.31579	1.6291	1.84964	-inf	-inf	2.84458e-11	8.23803e-08	down	yes
48756087	48758333	ENST00000222157	3	893	MSTRG.17488	FGF21	GO:0005104(fibroblast growth factor receptor binding);GO:0005515(protein binding);GO:0005576(extracellular region);GO:0005615(extracellular space);GO:0005623(cell);GO:0007165(signal transduction);GO:0007267(cell-cell signaling);GO:0008083(growth factor activity);GO:0008284(positive regulation of cell population proliferation);GO:0008543(fibroblast growth factor receptor signaling pathway);GO:0010…	04010(MAPK signaling pathway);04014(Ras signaling pathway);04015(Rap1 signaling pathway);04151(PI3K-Akt signaling pathway);04714(Thermogenesis);04810(Regulation of actin cytoskeleton);05200(Pathways in cancer);05218(Melanoma);05224(Breast cancer);05226(Gastric cancer)	K22429	NA	fibroblast growth factor 21 [Source:HGNC Symbol;Acc:HGNC:3678]	3.98691	3.39746	4.4124	4.35224	0	0	0	0	inf	inf	3.15412e-11	8.71928e-08	up	yes
49074792	49079902	ENST00000396681	10	1146	MSTRG.33963	WDR45	GO:0000045(autophagosome assembly);GO:0000407(phagophore assembly site);GO:0000422(autophagy of mitochondrion);GO:0005515(protein binding);GO:0005737(cytoplasm);GO:0005829(cytosol);GO:0006497(protein lipidation);GO:0006914(autophagy);GO:0008289(lipid binding);GO:0009267(cellular response to starvation);GO:0016020(membrane);GO:0016021(integral component of membrane);GO:0019898(extrinsic component …	NA	K22991	NA	WD repeat domain 45 [Source:HGNC Symbol;Acc:HGNC:28912]	0	0	0	0	2.44793	2.57733	3.14811	3.78411	-inf	-inf	4.17933e-11	1.10511e-07	down	yes
154257071	154263495	MSTRG.2177.18	7	1126	MSTRG.2177	UBAP2L	NA	NA	NA	NA	NA	0	0	0	0	2.38761	5.77232	3.2089	3.76218	-inf	-inf	4.38754e-11	1.11182e-07	down	yes
229791974	229921999	MSTRG.19992.10	30	4594	MSTRG.19992	TRIP12	NA	NA	NA	NA	NA	4.59145	7.46379	2.54781	2.83301	0.026365	0.011548	0.021915	0.030723	192.555	7.58913	5.18934e-11	1.2624e-07	up	yes
88877288	88895626	ENST00000359595	5	1980	MSTRG.11497	HAPLN3	GO:0001501(skeletal system development);GO:0005540(hyaluronic acid binding);GO:0005576(extracellular region);GO:0005615(extracellular space);GO:0007155(cell adhesion);GO:0007417(central nervous system development);GO:0031012(extracellular matrix)	NA	K06852	NA	hyaluronan and proteoglycan link protein 3 [Source:HGNC Symbol;Acc:HGNC:21446]	0.869747	1.50913	1.17822	1.18681	0	0	0	0	inf	inf	5.76515e-11	1.34853e-07	up	yes
18730164	18827660	ENST00000379962	15	2106	ENSG00000086717	PPEF1	GO:0004721(phosphoprotein phosphatase activity);GO:0004722(protein serine/threonine phosphatase activity);GO:0005506(iron ion binding);GO:0005509(calcium ion binding);GO:0005515(protein binding);GO:0005634(nucleus);GO:0005829(cytosol);GO:0006470(protein dephosphorylation);GO:0016787(hydrolase activity);GO:0022400(regulation of rhodopsin mediated signaling pathway);GO:0030145(manganese ion binding…	NA	NA	NA	protein phosphatase with EF-hand domain 1 [Source:HGNC Symbol;Acc:HGNC:9243]	0	0	0	0	1.1907	1.09013	0.807097	1.04174	-inf	-inf	6.31139e-11	1.3618e-07	down	yes
74461258	74465388	ENST00000647753	3	2445	MSTRG.18573	MOGS	GO:0003824(catalytic activity);GO:0004573(mannosyl-oligosaccharide glucosidase activity);GO:0005783(endoplasmic reticulum);GO:0005789(endoplasmic reticulum membrane);GO:0006457(protein folding);GO:0006487(protein N-linked glycosylation);GO:0008152(metabolic process);GO:0009311(oligosaccharide metabolic process);GO:0015926(glucosidase activity);GO:0016020(membrane);GO:0016021(integral component of…	00510(N-Glycan biosynthesis);04141(Protein processing in endoplasmic reticulum)	K01228	EC:3.2.1.106	mannosyl-oligosaccharide glucosidase [Source:HGNC Symbol;Acc:HGNC:24862]	0	0	0	0	3.24169	1.8034	1.11513	1.31836	-inf	-inf	6.34774e-11	1.3618e-07	down	yes
71664301	71680644	ENST00000308086	3	4432	MSTRG.7687	THAP2	GO:0000981(DNA-binding transcription factor activity, RNA polymerase II-specific);GO:0003676(nucleic acid binding);GO:0003677(DNA binding);GO:0005730(nucleolus);GO:0006357(regulation of transcription by RNA polymerase II);GO:0046872(metal ion binding)	NA	K23204	NA	THAP domain containing 2 [Source:HGNC Symbol;Acc:HGNC:20854]	0.425268	0.68289	0.789695	0.838871	0	0	0	0	inf	inf	6.61262e-11	1.3618e-07	up	yes
236795682	236898134	ENST00000535889	32	4157	MSTRG.3214	MTR	GO:0000096(sulfur amino acid metabolic process);GO:0005515(protein binding);GO:0005737(cytoplasm);GO:0005829(cytosol);GO:0007399(nervous system development);GO:0008168(methyltransferase activity);GO:0008270(zinc ion binding);GO:0008652(cellular amino acid biosynthetic process);GO:0008705(methionine synthase activity);GO:0009086(methionine biosynthetic process);GO:0009235(cobalamin metabolic proce…	00270(Cysteine and methionine metabolism);00450(Selenocompound metabolism);00670(One carbon pool by folate)	K00548	EC:2.1.1.13	5-methyltetrahydrofolate-homocysteine methyltransferase [Source:HGNC Symbol;Acc:HGNC:7468]	0	0	0	0	0.932259	0.454378	0.750729	0.87864	-inf	-inf	6.80114e-11	1.3618e-07	down	yes
73791324	73801793	ENST00000492395	18	4490	MSTRG.4043	ZSWIM8	GO:0008270(zinc ion binding);GO:0031462(Cul2-RING ubiquitin ligase complex);GO:0046872(metal ion binding);GO:1902667(regulation of axon guidance)	NA	NA	NA	zinc finger SWIM-type containing 8 [Source:HGNC Symbol;Acc:HGNC:23528]	0	0	0	0	0.663627	0.603888	0.416327	0.441198	-inf	-inf	6.94143e-11	1.3618e-07	down	yes
18989314	19122461	ENST00000357991	29	4661	MSTRG.33718	ADGRG2	GO:0004888(transmembrane signaling receptor activity);GO:0004930(G protein-coupled receptor activity);GO:0005829(cytosol);GO:0005886(plasma membrane);GO:0005887(integral component of plasma membrane);GO:0007165(signal transduction);GO:0007166(cell surface receptor signaling pathway);GO:0007186(G protein-coupled receptor signaling pathway);GO:0007189(adenylate cyclase-activating G protein-coupled …	NA	K08451	NA	adhesion G protein-coupled receptor G2 [Source:HGNC Symbol;Acc:HGNC:4516]	0.743545	0.52821	1.76796	0.792398	0	0	0	0	inf	inf	7.20067e-11	1.36851e-07	up	yes
87422597	87459454	ENST00000473942	8	2458	MSTRG.24885	NUDT9	GO:0005739(mitochondrion);GO:0005759(mitochondrial matrix);GO:0016787(hydrolase activity);GO:0019144(ADP-sugar diphosphatase activity);GO:0034656(nucleobase-containing small molecule catabolic process);GO:0043262(adenosine-diphosphatase activity);GO:0046032(ADP catabolic process);GO:0046709(IDP catabolic process);GO:0047631(ADP-ribose diphosphatase activity);GO:0070062(extracellular exosome)	00230(Purine metabolism)	K13988	EC:3.6.1.13	nudix hydrolase 9 [Source:HGNC Symbol;Acc:HGNC:8056]	0	0	0	0	1.33049	1.81956	0.83887	1.2855	-inf	-inf	7.54243e-11	1.39002e-07	down	yes
141128779	141195808	ENST00000518668	22	5185	MSTRG.32014	DENND3	GO:0005085(guanyl-nucleotide exchange factor activity);GO:0005515(protein binding);GO:0005737(cytoplasm);GO:0005829(cytosol);GO:0008333(endosome to lysosome transport);GO:0017112(Rab guanyl-nucleotide exchange factor activity);GO:0044257(cellular protein catabolic process)	NA	K20162	NA	DENN domain containing 3 [Source:HGNC Symbol;Acc:HGNC:29134]	0	0	0	0	0.679271	1.13307	0.39208	0.595735	-inf	-inf	9.23128e-11	1.64017e-07	down	yes
36253010	36267525	ENST00000397278	6	2918	ENSG00000100342	APOL1	GO:0005254(chloride channel activity);GO:0005515(protein binding);GO:0005576(extracellular region);GO:0005615(extracellular space);GO:0005788(endoplasmic reticulum lumen);GO:0006629(lipid metabolic process);GO:0006869(lipid transport);GO:0006898(receptor-mediated endocytosis);GO:0008202(steroid metabolic process);GO:0008203(cholesterol metabolic process);GO:0008289(lipid binding);GO:0019835(cytol…	05143(African trypanosomiasis)	K14480	NA	apolipoprotein L1 [Source:HGNC Symbol;Acc:HGNC:618]	0	0	0	0	1.30392	0.530558	1.11892	1.41379	-inf	-inf	9.43915e-11	1.64017e-07	down	yes
40580970	40606617	ENST00000636251	8	1877	MSTRG.33841	ATP6AP2	GO:0002003(angiotensin maturation);GO:0003824(catalytic activity);GO:0005515(protein binding);GO:0005615(extracellular space);GO:0005886(plasma membrane);GO:0009897(external side of plasma membrane);GO:0016020(membrane);GO:0016021(integral component of membrane);GO:0016324(apical plasma membrane);GO:0021903(rostrocaudal neural tube patterning);GO:0030177(positive regulation of Wnt signaling pathw…	04614(Renin-angiotensin system)	K19514	NA	ATPase H+ transporting accessory protein 2 [Source:HGNC Symbol;Acc:HGNC:18305]	0	0	0	0	1.35425	1.02875	0.655454	1.4325	-inf	-inf	1.07773e-10	1.7875e-07	down	yes
92842167	92961462	ENST00000370310	5	2536	MSTRG.1495	DIPK1A	GO:0005783(endoplasmic reticulum);GO:0005789(endoplasmic reticulum membrane);GO:0016020(membrane);GO:0016021(integral component of membrane)	NA	NA	NA	divergent protein kinase domain 1A [Source:HGNC Symbol;Acc:HGNC:32213]	0	0	0	0	1.47388	1.57347	2.1981	0.617965	-inf	-inf	1.11006e-10	1.7875e-07	down	yes
50546203	50551023	ENST00000648057	1	4821	ENSG00000130487	KLHDC7B	GO:0005515(protein binding)	NA	NA	NA	kelch domain containing 7B [Source:HGNC Symbol;Acc:HGNC:25145]	0.427404	0.464312	0.217546	0.574324	0	0	0	0	inf	inf	1.11688e-10	1.7875e-07	up	yes
27285821	27311251	MSTRG.31116.3	5	3204	MSTRG.31116	TRIM35	NA	NA	NA	NA	NA	3.61037	1.93473	1.92172	0.343605	0	0	0	0	inf	inf	1.39617e-10	2.1772e-07	up	yes
8705557	8787344	MSTRG.15556.4	7	3322	MSTRG.15556	MTCL1	NA	NA	NA	NA	NA	1.31638	1.48267	1.32066	1.68239	0.000317	0.00016	0.000357	0.000255	5327.91	12.3794	1.71116e-10	2.60168e-07	up	yes
225399710	225703624	MSTRG.19972.1	8	8286	MSTRG.19972	NYAP2	NA	NA	NA	NA	NA	0	0	0	0	4.39975	0.240102	2.04994	0.210895	-inf	-inf	1.81581e-10	2.69346e-07	down	yes
42315468	42388431	ENST00000389272	23	2615	MSTRG.14385	STAT3	GO:0000122(negative regulation of transcription by RNA polymerase II);GO:0000790(nuclear chromatin);GO:0000978(RNA polymerase II proximal promoter sequence-specific DNA binding);GO:0000981(DNA-binding transcription factor activity, RNA polymerase II-specific);GO:0001103(RNA polymerase II repressing transcription factor binding);GO:0001228(DNA-binding transcription activator activity, RNA polymera…	01521(EGFR tyrosine kinase inhibitor resistance);04062(Chemokine signaling pathway);04066(HIF-1 signaling pathway);04068(FoxO signaling pathway);04217(Necroptosis);04550(Signaling pathways regulating pluripotency of stem cells);04630(Jak-STAT signaling pathway);04659(Th17 cell differentiation);04917(Prolactin signaling pathway);04920(Adipocytokine signaling pathway);04931(Insulin resistance);0493…	K04692	NA	signal transducer and activator of transcription 3 [Source:HGNC Symbol;Acc:HGNC:11364]	0	0	0	0	1.30184	0.963736	0.723448	0.407405	-inf	-inf	1.95024e-10	2.82399e-07	down	yes
78378670	78424557	MSTRG.15270.9	9	2075	MSTRG.15270	PGS1	NA	NA	NA	NA	NA	0	0	0	0	1.7233	3.0857	0.578261	1.91615	-inf	-inf	2.22521e-10	3.14723e-07	down	yes
66510655	66532219	ENST00000630659	16	1934	MSTRG.5623	BBS1	GO:0001103(RNA polymerase II repressing transcription factor binding);GO:0001895(retina homeostasis);GO:0005113(patched binding);GO:0005119(smoothened binding);GO:0005515(protein binding);GO:0005737(cytoplasm);GO:0005813(centrosome);GO:0005815(microtubule organizing center);GO:0005829(cytosol);GO:0005856(cytoskeleton);GO:0005886(plasma membrane);GO:0005929(cilium);GO:0005930(axoneme);GO:0007601(v…	NA	NA	NA	Bardet-Biedl syndrome 1 [Source:HGNC Symbol;Acc:HGNC:966]	0.757229	0.830533	1.53054	0.585436	0	0	0	0	inf	inf	2.44139e-10	3.34026e-07	up	yes
98648971	98964530	ENST00000268035	21	11803	MSTRG.11631	IGF1R	GO:0000166(nucleotide binding);GO:0004672(protein kinase activity);GO:0004713(protein tyrosine kinase activity);GO:0004714(transmembrane receptor protein tyrosine kinase activity);GO:0005009(insulin-activated receptor activity);GO:0005010(insulin-like growth factor-activated receptor activity);GO:0005158(insulin receptor binding);GO:0005515(protein binding);GO:0005520(insulin-like growth factor b…	01521(EGFR tyrosine kinase inhibitor resistance);01522(Endocrine resistance);04010(MAPK signaling pathway);04014(Ras signaling pathway);04015(Rap1 signaling pathway);04066(HIF-1 signaling pathway);04068(FoxO signaling pathway);04114(Oocyte meiosis);04140(Autophagy - animal);04144(Endocytosis);04150(mTOR signaling pathway);04151(PI3K-Akt signaling pathway);04152(AMPK signaling pathway);04211(Longe…	K05087	EC:2.7.10.1	insulin like growth factor 1 receptor [Source:HGNC Symbol;Acc:HGNC:5465]	0	0	0	0.012744	2.39012	4.38313	3.73309	4.6352	0.000841658	-10.2145	2.47154e-10	3.34026e-07	down	yes
203439437	203495353	ENST00000374493	15	3909	MSTRG.19797	RAPH1	GO:0005515(protein binding);GO:0005737(cytoplasm);GO:0005829(cytosol);GO:0005856(cytoskeleton);GO:0005886(plasma membrane);GO:0007165(signal transduction);GO:0016020(membrane);GO:0016604(nuclear body);GO:0030027(lamellipodium);GO:0030175(filopodium);GO:0031252(cell leading edge);GO:0042995(cell projection);GO:0048675(axon extension)	NA	NA	NA	Ras association (RalGDS/AF-6) and pleckstrin homology domains 1 [Source:HGNC Symbol;Acc:HGNC:14436]	0	0	0	0	0.243211	0.377972	0.982797	0.48379	-inf	-inf	3.11811e-10	4.10619e-07	down	yes
47440401	47735916	ENST00000519401	11	2090	MSTRG.31307	SPIDR	GO:0000228(nuclear chromosome);GO:0000724(double-strand break repair via homologous recombination);GO:0005515(protein binding);GO:0005634(nucleus);GO:0005654(nucleoplasm);GO:0006281(DNA repair);GO:0006310(DNA recombination);GO:0006974(cellular response to DNA damage stimulus);GO:0010569(regulation of double-strand break repair via homologous recombination);GO:0031334(positive regulation of protei…	NA	K22806	NA	scaffold protein involved in DNA repair [Source:HGNC Symbol;Acc:HGNC:28971]	0	0	0	0	0.936333	0.539896	1.3718	0.648744	-inf	-inf	3.17331e-10	4.10619e-07	down	yes
36216943	36277042	ENST00000543356	11	2576	MSTRG.32525	GNE	GO:0000166(nucleotide binding);GO:0003824(catalytic activity);GO:0004553(hydrolase activity, hydrolyzing O-glycosyl compounds);GO:0005515(protein binding);GO:0005524(ATP binding);GO:0005737(cytoplasm);GO:0005829(cytosol);GO:0006045(N-acetylglucosamine biosynthetic process);GO:0006047(UDP-N-acetylglucosamine metabolic process);GO:0006054(N-acetylneuraminate metabolic process);GO:0007155(cell adhes…	00520(Amino sugar and nucleotide sugar metabolism)	K12409	2.7.1.60;EC:3.2.1.183	glucosamine (UDP-N-acetyl)-2-epimerase/N-acetylmannosamine kinase [Source:HGNC Symbol;Acc:HGNC:23657]	0	0	0	0	0.730506	0.593315	0.583539	0.798405	-inf	-inf	3.5708e-10	4.52428e-07	down	yes
1471769	1496201	MSTRG.90.4	16	2996	MSTRG.90	ATAD3B	NA	NA	NA	NA	NA	0	0	0	0	1.41019	0.269646	1.93308	1.2175	-inf	-inf	3.93543e-10	4.88452e-07	down	yes
150053291	150113372	MSTRG.27045.2	21	3760	MSTRG.27045	CSF1R	NA	NA	NA	NA	NA	2.49015	2.68532	4.53107	4.37226	0.013604	0	0	0	1034.9	10.0153	5.62635e-10	6.84356e-07	up	yes
97887977	98036212	ENST00000520016	18	3495	MSTRG.31684	MATN2	GO:0001764(neuron migration);GO:0003429(growth plate cartilage chondrocyte morphogenesis);GO:0005201(extracellular matrix structural constituent);GO:0005509(calcium ion binding);GO:0005515(protein binding);GO:0005576(extracellular region);GO:0005604(basement membrane);GO:0005615(extracellular space);GO:0007411(axon guidance);GO:0008150(biological_process);GO:0008347(glial cell migration);GO:00310…	NA	NA	NA	matrilin 2 [Source:HGNC Symbol;Acc:HGNC:6908]	0.812319	0.356372	0.760394	0.553194	0	0.000188	0	0	13203.6	13.6886	6.14583e-10	7.32884e-07	up	yes
95104355	95155016	ENST00000394931	10	1922	MSTRG.24955	BMPR1B	GO:0000166(nucleotide binding);GO:0001501(skeletal system development);GO:0001502(cartilage condensation);GO:0001550(ovarian cumulus expansion);GO:0001654(eye development);GO:0002062(chondrocyte differentiation);GO:0002063(chondrocyte development);GO:0004672(protein kinase activity);GO:0004674(protein serine/threonine kinase activity);GO:0004675(transmembrane receptor protein serine/threonine kin…	04060(Cytokine-cytokine receptor interaction);04350(TGF-beta signaling pathway);04360(Axon guidance);04390(Hippo signaling pathway);04550(Signaling pathways regulating pluripotency of stem cells);05418(Fluid shear stress and atherosclerosis)	NA	NA	bone morphogenetic protein receptor type 1B [Source:HGNC Symbol;Acc:HGNC:1077]	1.2148	1.03092	0.273393	1.09751	0	0	0	0	inf	inf	8.07987e-10	9.44987e-07	up	yes
46084150	46098295	ENST00000590156	12	1931	MSTRG.15844	ATP5F1A	GO:0000166(nucleotide binding);GO:0000275(mitochondrial proton-transporting ATP synthase complex, catalytic core F(1));GO:0001937(negative regulation of endothelial cell proliferation);GO:0003723(RNA binding);GO:0005515(protein binding);GO:0005524(ATP binding);GO:0005739(mitochondrion);GO:0005743(mitochondrial inner membrane);GO:0005753(mitochondrial proton-transporting ATP synthase complex);GO:0…	00190(Oxidative phosphorylation);04714(Thermogenesis);05010(Alzheimer disease);05012(Parkinson disease);05016(Huntington disease)	NA	NA	ATP synthase F1 subunit alpha [Source:HGNC Symbol;Acc:HGNC:823]	0	116.159	35.9298	121.74	0	0	0	0	inf	inf	1.01626e-09	1.16615e-06	up	yes
179604841	179624267	ENST00000480374	5	729	MSTRG.23907	NDUFB5	GO:0005654(nucleoplasm);GO:0005739(mitochondrion);GO:0005743(mitochondrial inner membrane);GO:0005747(mitochondrial respiratory chain complex I);GO:0006120(mitochondrial electron transport, NADH to ubiquinone);GO:0008137(NADH dehydrogenase (ubiquinone) activity);GO:0016020(membrane);GO:0016021(integral component of membrane);GO:0032981(mitochondrial respiratory chain complex I assembly);GO:005511…	00190(Oxidative phosphorylation);04714(Thermogenesis);04723(Retrograde endocannabinoid signaling);04932(Non-alcoholic fatty liver disease (NAFLD));05010(Alzheimer disease);05012(Parkinson disease);05016(Huntington disease)	K03961	NA	NADH:ubiquinone oxidoreductase subunit B5 [Source:HGNC Symbol;Acc:HGNC:7700]	5.01999	1.30155	4.33488	0.996309	0	0	0	0	inf	inf	1.07952e-09	1.17697e-06	up	yes
75399530	75405692	ENST00000532872	6	737	MSTRG.5856	RPS3	GO:0000184(nuclear-transcribed mRNA catabolic process, nonsense-mediated decay);GO:0000977(RNA polymerase II regulatory region sequence-specific DNA binding);GO:0003677(DNA binding);GO:0003684(damaged DNA binding);GO:0003723(RNA binding);GO:0003729(mRNA binding);GO:0003735(structural constituent of ribosome);GO:0003906(DNA-(apurinic or apyrimidinic site) endonuclease activity);GO:0004520(endodeox…	03010(Ribosome)	K02985	NA	ribosomal protein S3 [Source:HGNC Symbol;Acc:HGNC:10420]	0	104.661	233.214	269.064	0	0	0	0	inf	inf	1.07995e-09	1.17697e-06	up	yes
33379461	33401486	ENST00000461356	6	758	MSTRG.20506	CDK5RAP1	GO:0000079(regulation of cyclin-dependent protein serine/threonine kinase activity);GO:0003824(catalytic activity);GO:0005575(cellular_component);GO:0005739(mitochondrion);GO:0006400(tRNA modification);GO:0007420(brain development);GO:0016740(transferase activity);GO:0019901(protein kinase binding);GO:0035597(N6-isopentenyladenosine methylthiotransferase activity);GO:0035600(tRNA methylthiolation…	NA	NA	NA	CDK5 regulatory subunit associated protein 1 [Source:HGNC Symbol;Acc:HGNC:15880]	0.850846	1.51246	2.62562	5.77092	0	0	0	0	inf	inf	1.08375e-09	1.17697e-06	up	yes
48401643	48439360	ENST00000374182	11	5638	MSTRG.3799	MAPK8	GO:0000165(MAPK cascade);GO:0000166(nucleotide binding);GO:0004672(protein kinase activity);GO:0004674(protein serine/threonine kinase activity);GO:0004705(JUN kinase activity);GO:0004707(MAP kinase activity);GO:0005515(protein binding);GO:0005524(ATP binding);GO:0005634(nucleus);GO:0005654(nucleoplasm);GO:0005737(cytoplasm);GO:0005739(mitochondrion);GO:0005829(cytosol);GO:0006468(protein phospho…	01522(Endocrine resistance);04010(MAPK signaling pathway);04012(ErbB signaling pathway);04014(Ras signaling pathway);04024(cAMP signaling pathway);04068(FoxO signaling pathway);04071(Sphingolipid signaling pathway);04137(Mitophagy - animal);04140(Autophagy - animal);04141(Protein processing in endoplasmic reticulum);04210(Apoptosis);04215(Apoptosis - multiple species);04217(Necroptosis);04310(Wnt…	NA	NA	mitogen-activated protein kinase 8 [Source:HGNC Symbol;Acc:HGNC:6881]	0.984744	0.226822	0.957267	0.162972	0	0	0	0	inf	inf	1.229e-09	1.3113e-06	up	yes
93446905	93453257	ENST00000520470	4	1553	MSTRG.32841	FAM120AOS	NA	NA	NA	NA	family with sequence similarity 120A opposite strand [Source:HGNC Symbol;Acc:HGNC:23389]	0.310218	2.11915	1.17261	3.1364	0	0	0	0	inf	inf	1.51525e-09	1.58884e-06	up	yes
43766822	43780973	MSTRG.17301.7	8	1567	MSTRG.17301	KCNN4	NA	NA	NA	NA	NA	0	0	0	0	3.37108	0.61777	0.483583	1.41854	-inf	-inf	1.95731e-09	2.01759e-06	down	yes
225494397	225703654	MSTRG.19972.5	6	7317	MSTRG.19972	NYAP2	NA	NA	NA	NA	NA	16.2851	10.3432	16.5245	1.06242	0.131883	0.092615	0.111992	0.030703	120.414	6.91186	2.10956e-09	2.13829e-06	up	yes
111496947	111512535	ENST00000512160	5	3500	MSTRG.26591	STARD4	GO:0006869(lipid transport);GO:0008289(lipid binding);GO:0010873(positive regulation of cholesterol esterification);GO:0010879(cholesterol transport involved in cholesterol storage);GO:0015485(cholesterol binding);GO:0017127(cholesterol transporter activity);GO:0031410(cytoplasmic vesicle);GO:0032367(intracellular cholesterol transport);GO:0070508(cholesterol import);GO:0070859(positive regulatio…	NA	NA	NA	StAR related lipid transfer domain containing 4 [Source:HGNC Symbol;Acc:HGNC:18058]	0	0	0	0	0.354446	3.44013	4.86889	0.244434	-inf	-inf	2.44835e-09	2.44101e-06	down	yes
139336873	139391368	MSTRG.25296.4	19	4518	MSTRG.25296	NAA15	NA	NA	NA	NA	NA	0	0	0	0	13.2678	15.3292	15.0778	0	-inf	-inf	3.87617e-09	3.80221e-06	down	yes
53532096	53549505	ENST00000426907	18	4805	MSTRG.33993	HUWE1	GO:0000209(protein polyubiquitination);GO:0003677(DNA binding);GO:0003723(RNA binding);GO:0004842(ubiquitin-protein transferase activity);GO:0005515(protein binding);GO:0005576(extracellular region);GO:0005634(nucleus);GO:0005654(nucleoplasm);GO:0005737(cytoplasm);GO:0005829(cytosol);GO:0006281(DNA repair);GO:0006284(base-excision repair);GO:0006511(ubiquitin-dependent protein catabolic process);…	04120(Ubiquitin mediated proteolysis)	K10592	EC:2.3.2.26	HECT, UBA and WWE domain containing 1, E3 ubiquitin protein ligase [Source:HGNC Symbol;Acc:HGNC:30892]	0	0	0	0	12.2186	0	13.5378	13.4821	-inf	-inf	4.39003e-09	4.23791e-06	down	yes
122272834	122380494	ENST00000540338	25	4400	MSTRG.8272	CLIP1	GO:0000278(mitotic cell cycle);GO:0000776(kinetochore);GO:0001578(microtubule bundle formation);GO:0001726(ruffle);GO:0005515(protein binding);GO:0005635(nuclear envelope);GO:0005737(cytoplasm);GO:0005768(endosome);GO:0005813(centrosome);GO:0005829(cytosol);GO:0005856(cytoskeleton);GO:0005874(microtubule);GO:0005881(cytoplasmic microtubule);GO:0005882(intermediate filament);GO:0008017(microtubule…	04150(mTOR signaling pathway)	K10421	NA	CAP-Gly domain containing linker protein 1 [Source:HGNC Symbol;Acc:HGNC:10461]	0	0	0	0	10.5749	11.5453	0	12.1268	-inf	-inf	6.36039e-09	6.04406e-06	down	yes
44034636	44066735	ENST00000293406	5	2308	MSTRG.14448	LSM12	GO:0016070(RNA metabolic process)	NA	NA	NA	LSM12 homolog [Source:HGNC Symbol;Acc:HGNC:26407]	0	0	0	0	0	23.7873	21.44	19.7425	-inf	-inf	6.77684e-09	6.34073e-06	down	yes
70289045	70330199	MSTRG.16067.2	3	5904	MSTRG.16067	SOCS6	NA	NA	NA	NA	NA	0	0	0	0	0.021221	0.714115	4.65075	1.66223	-inf	-inf	7.23468e-09	6.66654e-06	down	yes
28357647	28381697	ENST00000591482	6	1050	MSTRG.13921	AC002094	NA	NA	NA	NA	novel transcript readthrough between TMEM199 and SARM1	0	7.9e-05	0	0.003118	1.44052	2.7227	1.14436	1.33942	0.000480969	-11.0218	8.16435e-09	7.41092e-06	down	yes
74361552	74362041	ENST00000569235	1	490	MSTRG.11220	PPIAP46	NA	NA	NA	NA	peptidylprolyl isomerase A pseudogene 46 [Source:HGNC Symbol;Acc:HGNC:53670]	0.108305	0.122414	0.071732	0.090705	12.0352	17.9387	12.3936	8.67088	0.00770314	-7.02034	8.84708e-09	7.91254e-06	down	yes
45336899	45339533	ENST00000528619	4	731	MSTRG.8697	TPT1	GO:0000922(spindle pole);GO:0003723(RNA binding);GO:0005509(calcium ion binding);GO:0005515(protein binding);GO:0005615(extracellular space);GO:0005634(nucleus);GO:0005737(cytoplasm);GO:0005771(multivesicular body);GO:0005829(cytosol);GO:0005881(cytoplasmic microtubule);GO:0006816(calcium ion transport);GO:0006874(cellular calcium ion homeostasis);GO:0009615(response to virus);GO:0042981(regulati…	NA	NA	NA	tumor protein, translationally-controlled 1 [Source:HGNC Symbol;Acc:HGNC:12022]	0	0	0	0	25.3569	0.021742	29.9592	23.7572	-inf	-inf	9.34359e-09	8.13894e-06	down	yes
50742120	50801820	MSTRG.12617.9	19	8433	MSTRG.12617	CYLD	NA	NA	NA	NA	NA	0	0	0	0	0.16578	0.187261	1.98357	0.130061	-inf	-inf	9.36787e-09	8.13894e-06	down	yes
157138951	157269116	MSTRG.30863.3	23	4931	MSTRG.30863	UBE3C	NA	NA	NA	NA	NA	0	0	0	0	10.2074	7.98778	6.78765	0	-inf	-inf	1.08869e-08	9.32544e-06	down	yes
84980513	85139142	ENST00000557957	22	3716	MSTRG.11473	PDE8A	GO:0001934(positive regulation of protein phosphorylation);GO:0004114(3',5'-cyclic-nucleotide phosphodiesterase activity);GO:0004115(3',5'-cyclic-AMP phosphodiesterase activity);GO:0005829(cytosol);GO:0006198(cAMP catabolic process);GO:0006355(regulation of transcription, DNA-templated);GO:0007165(signal transduction);GO:0007186(G protein-coupled receptor signaling pathway);GO:0008081(phosphoric …	00230(Purine metabolism);04927(Cortisol synthesis and secretion);04934(Cushing syndrome);05032(Morphine addiction)	NA	NA	phosphodiesterase 8A [Source:HGNC Symbol;Acc:HGNC:8793]	0.176504	0.60337	9.98351	1.45992	0	0	8.3e-05	0	147269	17.1681	1.14713e-08	9.68963e-06	up	yes
39105429	39486987	MSTRG.823.8	93	17555	MSTRG.823	MACF1	NA	NA	NA	NA	NA	9.87289	0.005941	0.004466	14.435	0	0	0	0	inf	inf	1.26812e-08	1.05648e-05	up	yes
2475127	2505730	ENST00000646147	8	6611	MSTRG.11852	TBC1D24	GO:0005096(GTPase activator activity);GO:0005515(protein binding);GO:0005737(cytoplasm);GO:0005886(plasma membrane);GO:0016020(membrane);GO:0030054(cell junction);GO:0030659(cytoplasmic vesicle membrane);GO:0031175(neuron projection development);GO:0031410(cytoplasmic vesicle);GO:0031594(neuromuscular junction);GO:0043195(terminal bouton);GO:0043547(positive regulation of GTPase activity)	NA	K21841	NA	TBC1 domain family member 24 [Source:HGNC Symbol;Acc:HGNC:29203]	2.02499	0.033477	2.58688	2.37516	0.002039	0.000818	0	0.00294	1211.06	10.2421	1.29626e-08	1.06533e-05	up	yes
40580998	40606637	ENST00000636287	8	1904	MSTRG.33841	ATP6AP2	GO:0002003(angiotensin maturation);GO:0003824(catalytic activity);GO:0005515(protein binding);GO:0005615(extracellular space);GO:0005886(plasma membrane);GO:0009897(external side of plasma membrane);GO:0016020(membrane);GO:0016021(integral component of membrane);GO:0016324(apical plasma membrane);GO:0021903(rostrocaudal neural tube patterning);GO:0030177(positive regulation of Wnt signaling pathw…	04614(Renin-angiotensin system)	K19514	NA	ATPase H+ transporting accessory protein 2 [Source:HGNC Symbol;Acc:HGNC:18305]	0	0	0	0	1.0341	0.821202	0.708708	0.625669	-inf	-inf	1.32802e-08	1.07688e-05	down	yes
28701327	28753687	ENST00000220562	7	6483	MSTRG.31140	EXTL3	GO:0001888(glucuronyl-galactosyl-proteoglycan 4-alpha-N-acetylglucosaminyltransferase activity);GO:0005783(endoplasmic reticulum);GO:0005789(endoplasmic reticulum membrane);GO:0005794(Golgi apparatus);GO:0006486(protein glycosylation);GO:0015012(heparan sulfate proteoglycan biosynthetic process);GO:0016020(membrane);GO:0016021(integral component of membrane);GO:0016740(transferase activity);GO:00…	00534(Glycosaminoglycan biosynthesis - heparan sulfate / heparin)	K02370	2.4.1.224;EC:2.4.1.223	exostosin like glycosyltransferase 3 [Source:HGNC Symbol;Acc:HGNC:3518]	0	0	0	0	1.53743	5.81686	0.003569	1.99321	-inf	-inf	1.36256e-08	1.09035e-05	down	yes
49245940	49278086	MSTRG.20771.7	14	7244	MSTRG.20771	ZNFX1	NA	NA	NA	NA	NA	6.88687	2.5592	0	7.11971	0	0	0	0	inf	inf	1.44088e-08	1.13805e-05	up	yes
35772033	35951365	MSTRG.20586.10	19	6959	MSTRG.20586	PHF20	NA	NA	NA	NA	NA	0.010746	9.92338	5.35006	2.05742	0.009729	0.005162	0.002597	0.005485	754.869	9.56008	1.52222e-08	1.18688e-05	up	yes
128428070	128507536	MSTRG.25230.6	7	6792	MSTRG.25230	LINC02615	NA	NA	NA	NA	NA	0	7.1789	1.83542	8.57328	0	0	0	0	inf	inf	1.64347e-08	1.2652e-05	up	yes
144388018	144517825	ENST00000409487	10	5361	MSTRG.19230	ZEB2	GO:0000122(negative regulation of transcription by RNA polymerase II);GO:0000790(nuclear chromatin);GO:0000981(DNA-binding transcription factor activity, RNA polymerase II-specific);GO:0001227(DNA-binding transcription repressor activity, RNA polymerase II-specific);GO:0001228(DNA-binding transcription activator activity, RNA polymerase II-specific);GO:0001755(neural crest cell migration);GO:0001…	05206(MicroRNAs in cancer)	K09299	NA	zinc finger E-box binding homeobox 2 [Source:HGNC Symbol;Acc:HGNC:14881]	2.69705	0.072809	0.689369	0.639257	0	5e-06	0	0	819697	19.6447	1.78981e-08	1.36063e-05	up	yes
58559682	58582846	MSTRG.31368.14	9	2148	MSTRG.31368	SDCBP	NA	NA	NA	NA	NA	7.13203	40.5884	0	14.3772	0	0	0	0	inf	inf	1.85903e-08	1.39581e-05	up	yes
67022604	67050863	MSTRG.5633.2	8	3549	MSTRG.5633	SYT12	NA	NA	NA	NA	NA	0	0	0	0	0.926545	1.08933	0.841782	0.029096	-inf	-inf	1.89819e-08	1.39728e-05	down	yes
56221487	56314788	MSTRG.17706.4	6	1916	MSTRG.17706	ZSCAN5A	NA	NA	NA	NA	NA	0.018487	0	0	0	1.00525	1.37368	1.52136	1.24892	0.00359026	-8.1217	1.90694e-08	1.39728e-05	down	yes
8014040	8026296	ENST00000487559	4	787	MSTRG.204	ERRFI1	GO:0005096(GTPase activator activity);GO:0005515(protein binding);GO:0005634(nucleus);GO:0005737(cytoplasm);GO:0005829(cytosol);GO:0005886(plasma membrane);GO:0007175(negative regulation of epidermal growth factor-activated receptor activity);GO:0016020(membrane);GO:0017124(SH3 domain binding);GO:0019900(kinase binding);GO:0019901(protein kinase binding);GO:0031234(extrinsic component of cytoplas…	NA	NA	NA	ERBB receptor feedback inhibitor 1 [Source:HGNC Symbol;Acc:HGNC:18185]	4.04223	3.27935	3.18626	2.25457	0.048907	0.007466	0.003363	0.004473	198.763	7.63491	2.11925e-08	1.53436e-05	up	yes
24976392	24977061	MSTRG.27625.2	2	603	MSTRG.27625	PPIAP29	NA	NA	NA	NA	NA	0	0	0	0	0	75.9818	30.5478	67.7028	-inf	-inf	2.18124e-08	1.56066e-05	down	yes
150218555	150234678	ENST00000616917	7	2989	MSTRG.1967	ANP32E	GO:0000812(Swr1 complex);GO:0005515(protein binding);GO:0005634(nucleus);GO:0005737(cytoplasm);GO:0006325(chromatin organization);GO:0019212(phosphatase inhibitor activity);GO:0031410(cytoplasmic vesicle);GO:0042393(histone binding);GO:0043086(negative regulation of catalytic activity);GO:0043486(histone exchange)	NA	K18648	NA	acidic nuclear phosphoprotein 32 family member E [Source:HGNC Symbol;Acc:HGNC:16673]	0.017929	0.052268	0.0226	0.013	14.0849	0.037331	32.214	9.38614	0.00189864	-9.04081	2.42741e-08	1.7166e-05	down	yes
210439583	210676296	ENST00000367009	6	2714	MSTRG.2853	HHAT	GO:0000166(nucleotide binding);GO:0005525(GTP binding);GO:0005783(endoplasmic reticulum);GO:0005789(endoplasmic reticulum membrane);GO:0007224(smoothened signaling pathway);GO:0007275(multicellular organism development);GO:0008374(O-acyltransferase activity);GO:0016020(membrane);GO:0016021(integral component of membrane);GO:0016409(palmitoyltransferase activity);GO:0016740(transferase activity);G…	NA	NA	NA	hedgehog acyltransferase [Source:HGNC Symbol;Acc:HGNC:18270]	1.7792	3.18575	0.674481	0.835861	0	0	0	0.012256	528.337	9.04531	2.49331e-08	1.72887e-05	up	yes
231708536	231713289	ENST00000409683	5	933	MSTRG.20023	PTMA	GO:0005515(protein binding);GO:0005634(nucleus);GO:0005654(nucleoplasm);GO:0005829(cytosol);GO:0006351(transcription, DNA-templated);GO:0033613(activating transcription factor binding);GO:0042393(histone binding);GO:0043066(negative regulation of apoptotic process);GO:0043486(histone exchange)	NA	NA	NA	prothymosin alpha [Source:HGNC Symbol;Acc:HGNC:9623]	0	0	0	0	50.2389	0	22.2255	33.9088	-inf	-inf	2.50161e-08	1.72887e-05	down	yes
69339797	69343104	ENST00000254941	4	1887	MSTRG.12895	NIP7	GO:0003723(RNA binding);GO:0005515(protein binding);GO:0005634(nucleus);GO:0005730(nucleolus);GO:0005829(cytosol);GO:0030687(preribosome, large subunit precursor);GO:0042254(ribosome biogenesis);GO:0042255(ribosome assembly);GO:0042273(ribosomal large subunit biogenesis)	NA	K07565	NA	NIP7, nucleolar pre-rRNA processing protein [Source:HGNC Symbol;Acc:HGNC:24328]	0	0	0	0	0.801529	0.409025	0.829386	0.978743	-inf	-inf	2.58065e-08	1.76346e-05	down	yes
35871491	35880360	ENST00000605140	3	1217	MSTRG.14187	CCL5	GO:0000165(MAPK cascade);GO:0002407(dendritic cell chemotaxis);GO:0002548(monocyte chemotaxis);GO:0002676(regulation of chronic inflammatory response);GO:0004435(phosphatidylinositol phospholipase C activity);GO:0004672(protein kinase activity);GO:0005125(cytokine activity);GO:0005515(protein binding);GO:0005576(extracellular region);GO:0005615(extracellular space);GO:0005623(cell);GO:0005737(cyt…	04060(Cytokine-cytokine receptor interaction);04062(Chemokine signaling pathway);04620(Toll-like receptor signaling pathway);04621(NOD-like receptor signaling pathway);04623(Cytosolic DNA-sensing pathway);04668(TNF signaling pathway);05020(Prion diseases);05120(Epithelial cell signaling in Helicobacter pylori infection);05142(Chagas disease (American trypanosomiasis));05163(Human cytomegalovirus …	K12499	NA	C-C motif chemokine ligand 5 [Source:HGNC Symbol;Acc:HGNC:10632]	0.033143	0.033956	0	0	11.3267	10.8485	6.91079	1.60434	0.00218632	-8.83728	2.82698e-08	1.87893e-05	down	yes
60355919	60397968	ENST00000560165	8	718	MSTRG.10992	ANXA2	GO:0001525(angiogenesis);GO:0001726(ruffle);GO:0001765(membrane raft assembly);GO:0001786(phosphatidylserine binding);GO:0001921(positive regulation of receptor recycling);GO:0001934(positive regulation of protein phosphorylation);GO:0002020(protease binding);GO:0003417(growth plate cartilage development);GO:0003723(RNA binding);GO:0004859(phospholipase inhibitor activity);GO:0005262(calcium chan…	NA	NA	NA	annexin A2 [Source:HGNC Symbol;Acc:HGNC:537]	0	0	0	0	11.704	4.74639	1.39693	0.347765	-inf	-inf	2.8406e-08	1.87893e-05	down	yes
35587515	35724086	ENST00000618940	22	3415	MSTRG.14199	AP2B1	GO:0003279(cardiac septum development);GO:0003281(ventricular septum development);GO:0005048(signal sequence binding);GO:0005515(protein binding);GO:0005737(cytoplasm);GO:0005829(cytosol);GO:0005886(plasma membrane);GO:0005905(clathrin-coated pit);GO:0006886(intracellular protein transport);GO:0006897(endocytosis);GO:0007507(heart development);GO:0015031(protein transport);GO:0016020(membrane);GO…	04144(Endocytosis);04721(Synaptic vesicle cycle);04961(Endocrine and other factor-regulated calcium reabsorption);05016(Huntington disease)	NA	NA	adaptor related protein complex 2 subunit beta 1 [Source:HGNC Symbol;Acc:HGNC:563]	0.015843	0.030236	0	0.02419	0.056046	33.7696	18.1048	8.67446	0.00115946	-9.75233	2.84233e-08	1.87893e-05	down	yes
21358992	21379302	ENST00000380870	5	1142	MSTRG.16902	ZNF738	GO:0000209(protein polyubiquitination);GO:0003676(nucleic acid binding);GO:0003677(DNA binding);GO:0004842(ubiquitin-protein transferase activity);GO:0005622(intracellular);GO:0005634(nucleus);GO:0006355(regulation of transcription, DNA-templated)	NA	NA	NA	zinc finger protein 738 [Source:HGNC Symbol;Acc:HGNC:32469]	0.568067	1.19189	1.4257	1.58798	0	0	0	0	inf	inf	2.92296e-08	1.91146e-05	up	yes
143018542	143022182	ENST00000522971	4	857	MSTRG.32040	LY6E	GO:0005576(extracellular region);GO:0005886(plasma membrane);GO:0007166(cell surface receptor signaling pathway);GO:0016020(membrane);GO:0030550(acetylcholine receptor inhibitor activity);GO:0031225(anchored component of membrane);GO:2000272(negative regulation of signaling receptor activity)	NA	K06846	NA	lymphocyte antigen 6 family member E [Source:HGNC Symbol;Acc:HGNC:6727]	0	0	0	0	35.1014	33.965	31.6014	0	-inf	-inf	2.98024e-08	1.91558e-05	down	yes
41143142	41180818	MSTRG.21318.6	4	12832	MSTRG.21318	LINC00323	NA	NA	NA	NA	NA	0.637835	1.63114	1.71415	0.785681	0	0.008214	0	0	580.571	9.18133	3.00506e-08	1.91558e-05	up	yes
35772012	35950370	MSTRG.20586.2	17	5603	MSTRG.20586	PHF20	NA	NA	NA	NA	NA	0	0	0	0	0	3.17991	9.67203	4.58857	-inf	-inf	3.05484e-08	1.91558e-05	down	yes
212035846	212104594	ENST00000475419	13	3662	MSTRG.2881	DTL	GO:0000209(protein polyubiquitination);GO:0004842(ubiquitin-protein transferase activity);GO:0005515(protein binding);GO:0005634(nucleus);GO:0005654(nucleoplasm);GO:0005694(chromosome);GO:0005730(nucleolus);GO:0005737(cytoplasm);GO:0005813(centrosome);GO:0005815(microtubule organizing center);GO:0005829(cytosol);GO:0005856(cytoskeleton);GO:0006260(DNA replication);GO:0006511(ubiquitin-dependent p…	NA	K11790	NA	denticleless E3 ubiquitin protein ligase homolog [Source:HGNC Symbol;Acc:HGNC:30288]	0	0	0	0	0.104241	4.68716	4.42305	0.10202	-inf	-inf	3.05524e-08	1.91558e-05	down	yes
36249333	36301900	ENST00000502994	15	2278	MSTRG.25925	RANBP3L	GO:0005096(GTPase activator activity);GO:0005634(nucleus);GO:0005643(nuclear pore);GO:0005737(cytoplasm);GO:0006611(protein export from nucleus);GO:0008536(Ran GTPase binding);GO:0043547(positive regulation of GTPase activity);GO:0045663(positive regulation of myoblast differentiation);GO:0045668(negative regulation of osteoblast differentiation);GO:0046332(SMAD binding);GO:0046907(intracellular …	NA	NA	NA	RAN binding protein 3 like [Source:HGNC Symbol;Acc:HGNC:26353]	0.007944	0	0.014196	0	2.59553	7.35624	1.05232	1.83315	0.00172467	-9.17946	3.31465e-08	2.05701e-05	down	yes
6580835	6595409	ENST00000644356	20	3075	MSTRG.6634	CHD4	GO:0000122(negative regulation of transcription by RNA polymerase II);GO:0000166(nucleotide binding);GO:0000790(nuclear chromatin);GO:0000978(RNA polymerase II proximal promoter sequence-specific DNA binding);GO:0000980(RNA polymerase II distal enhancer sequence-specific DNA binding);GO:0001103(RNA polymerase II repressing transcription factor binding);GO:0003677(DNA binding);GO:0004003(ATP-depen…	05165(Human papillomavirus infection);05203(Viral carcinogenesis)	NA	NA	chromodomain helicase DNA binding protein 4 [Source:HGNC Symbol;Acc:HGNC:1919]	0.198116	0.258527	0.08324	0.10536	34.4568	33.7126	34.2937	0.345279	0.00627618	-7.3159	3.56288e-08	2.18873e-05	down	yes
40287933	40302236	ENST00000649662	12	1948	MSTRG.14328	CDC6	GO:0000076(DNA replication checkpoint);GO:0000079(regulation of cyclin-dependent protein serine/threonine kinase activity);GO:0000082(G1/S transition of mitotic cell cycle);GO:0000083(regulation of transcription involved in G1/S transition of mitotic cell cycle);GO:0000166(nucleotide binding);GO:0000278(mitotic cell cycle);GO:0000922(spindle pole);GO:0003688(DNA replication origin binding);GO:000…	04110(Cell cycle)	NA	NA	cell division cycle 6 [Source:HGNC Symbol;Acc:HGNC:1744]	10.9115	12.277	0	17.2866	0	0	0	0	inf	inf	3.61913e-08	2.20105e-05	up	yes
67241627	67335819	MSTRG.9766.8	15	5486	MSTRG.9766	MPP5	NA	NA	NA	NA	NA	0	0	0	0	0.059671	5.46529	9.70385	0.014786	-inf	-inf	3.7397e-08	2.25185e-05	down	yes
67571063	67589440	ENST00000557971	20	5555	MSTRG.9771	PLEKHH1	GO:0005856(cytoskeleton)	NA	NA	NA	pleckstrin homology, MyTH4 and FERM domain containing H1 [Source:HGNC Symbol;Acc:HGNC:17733]	0	0	0	0	0.748433	0.01883	0.202855	0.898503	-inf	-inf	3.98676e-08	2.37708e-05	down	yes
142751498	142944979	MSTRG.28979.5	11	9867	MSTRG.28979	HIVEP2	NA	NA	NA	NA	NA	3.88238	4.01522	3.15379	0.250911	0.019368	0.025668	0.001747	0.041375	128.205	7.00231	4.10517e-08	2.42392e-05	up	yes
54849653	54887195	ENST00000649769	9	5311	MSTRG.1134	DHCR24	GO:0000139(Golgi membrane);GO:0000246(delta24(24-1) sterol reductase activity);GO:0005634(nucleus);GO:0005737(cytoplasm);GO:0005783(endoplasmic reticulum);GO:0005789(endoplasmic reticulum membrane);GO:0005794(Golgi apparatus);GO:0005829(cytosol);GO:0005856(cytoskeleton);GO:0006629(lipid metabolic process);GO:0006694(steroid biosynthetic process);GO:0006695(cholesterol biosynthetic process);GO:000…	00100(Steroid biosynthesis)	K09828	1.3.1.-;EC:1.3.1.72	24-dehydrocholesterol reductase [Source:HGNC Symbol;Acc:HGNC:2859]	0.169216	0.596412	0.21698	0.274713	15.4278	13.149	16.8805	5.64102	0.0246059	-5.34485	4.16068e-08	2.43308e-05	down	yes
35892580	35920019	ENST00000635259	17	2836	MSTRG.752	AGO1	GO:0000932(P-body);GO:0000956(nuclear-transcribed mRNA catabolic process);GO:0000978(RNA polymerase II proximal promoter sequence-specific DNA binding);GO:0000993(RNA polymerase II complex binding);GO:0001047(core promoter binding);GO:0003676(nucleic acid binding);GO:0003723(RNA binding);GO:0003725(double-stranded RNA binding);GO:0003727(single-stranded RNA binding);GO:0005515(protein binding);GO…	NA	K11593	NA	argonaute RISC catalytic component 1 [Source:HGNC Symbol;Acc:HGNC:3262]	4.30686	2.36686	0.937646	4.21509	0.037793	0.034506	0.030114	0.035675	85.6443	6.42029	4.56914e-08	2.64649e-05	up	yes
48975324	48983826	ENST00000649162	7	1625	MSTRG.5310	TRIM51GP	GO:0005515(protein binding);GO:0008270(zinc ion binding);GO:0046872(metal ion binding)	NA	NA	NA	tripartite motif-containing 51G, pseudogene [Source:HGNC Symbol;Acc:HGNC:43972]	0	0	0	0	0.847835	0.698851	0.996594	0.606582	-inf	-inf	4.77912e-08	2.742e-05	down	yes
26634393	26659752	ENST00000456172	3	4718	MSTRG.27693	ZNF322	GO:0000981(DNA-binding transcription factor activity, RNA polymerase II-specific);GO:0003676(nucleic acid binding);GO:0003677(DNA binding);GO:0003700(DNA-binding transcription factor activity);GO:0005634(nucleus);GO:0005737(cytoplasm);GO:0005813(centrosome);GO:0005829(cytosol);GO:0006355(regulation of transcription, DNA-templated);GO:0006357(regulation of transcription by RNA polymerase II);GO:00…	NA	NA	NA	zinc finger protein 322 [Source:HGNC Symbol;Acc:HGNC:23640]	5.07387	6.36695	0	3.78609	0	0	0	0	inf	inf	4.93502e-08	2.80498e-05	up	yes
66379225	66392985	ENST00000563425	6	1932	ENSG00000179776	CDH5	GO:0000902(cell morphogenesis);GO:0001955(blood vessel maturation);GO:0005102(signaling receptor binding);GO:0005509(calcium ion binding);GO:0005515(protein binding);GO:0005886(plasma membrane);GO:0005911(cell-cell junction);GO:0005912(adherens junction);GO:0005913(cell-cell adherens junction);GO:0005923(bicellular tight junction);GO:0007043(cell-cell junction assembly);GO:0007155(cell adhesion);…	04514(Cell adhesion molecules (CAMs));04670(Leukocyte transendothelial migration);05418(Fluid shear stress and atherosclerosis)	NA	NA	cadherin 5 [Source:HGNC Symbol;Acc:HGNC:1764]	0	0	0	0	0.599411	0.77567	0.870785	0.401495	-inf	-inf	5.95363e-08	3.35261e-05	down	yes
190077	213697	ENST00000359674	16	3165	MSTRG.6507	SLC6A12	GO:0003333(amino acid transmembrane transport);GO:0005328(neurotransmitter:sodium symporter activity);GO:0005332(gamma-aminobutyric acid:sodium symporter activity);GO:0005515(protein binding);GO:0005886(plasma membrane);GO:0005887(integral component of plasma membrane);GO:0006836(neurotransmitter transport);GO:0006865(amino acid transport);GO:0015171(amino acid transmembrane transporter activity)…	04721(Synaptic vesicle cycle);04727(GABAergic synapse)	K05045	NA	solute carrier family 6 member 12 [Source:HGNC Symbol;Acc:HGNC:11045]	0.020912	0	0	0	1.21996	2.96793	3.52658	1.89319	0.00217659	-8.84371	6.20097e-08	3.45985e-05	down	yes
46375756	46391419	ENST00000611655	10	1398	MSTRG.3778	ANXA8L1	GO:0005509(calcium ion binding);GO:0005544(calcium-dependent phospholipid binding);GO:0005546(phosphatidylinositol-4,5-bisphosphate binding);GO:0005547(phosphatidylinositol-3,4,5-trisphosphate binding);GO:0005623(cell);GO:0007032(endosome organization);GO:0016197(endosomal transport);GO:0043325(phosphatidylinositol-3,4-bisphosphate binding);GO:0046872(metal ion binding);GO:0051015(actin filament …	NA	K17096	NA	annexin A8 like 1 [Source:HGNC Symbol;Acc:HGNC:23334]	2.4652	4.42619	3.89164	0.133592	0.000388	0	0.002558	0.005155	1347.56	10.3961	6.44935e-08	3.53146e-05	up	yes
20249864	20312256	ENST00000440577	17	4352	MSTRG.17944	PUM2	GO:0003723(RNA binding);GO:0003730(mRNA 3'-UTR binding);GO:0005515(protein binding);GO:0005737(cytoplasm);GO:0005829(cytosol);GO:0006417(regulation of translation);GO:0010494(cytoplasmic stress granule);GO:0010608(posttranscriptional regulation of gene expression);GO:0031965(nuclear membrane);GO:0034063(stress granule assembly);GO:0035196(production of miRNAs involved in gene silencing by miRNA);…	NA	K17943	NA	pumilio RNA binding family member 2 [Source:HGNC Symbol;Acc:HGNC:14958]	7.07589	2.0733	0.057238	6.70997	0.023623	0.011758	0.011401	0.01405	261.645	8.03147	6.47592e-08	3.53146e-05	up	yes
39331138	39486987	ENST00000289893	64	19141	MSTRG.823	MACF1	GO:0003723(RNA binding);GO:0003779(actin binding);GO:0005198(structural molecule activity);GO:0005509(calcium ion binding);GO:0005515(protein binding);GO:0005737(cytoplasm);GO:0005794(Golgi apparatus);GO:0005856(cytoskeleton);GO:0005874(microtubule);GO:0005882(intermediate filament);GO:0005886(plasma membrane);GO:0007010(cytoskeleton organization);GO:0008017(microtubule binding);GO:0008092(cytosk…	NA	K19827	NA	microtubule-actin crosslinking factor 1 [Source:HGNC Symbol;Acc:HGNC:13664]	0	0	0	0	1.44417	0	0.20365	7.60418	-inf	-inf	6.5035e-08	3.53146e-05	down	yes
98417015	98446887	ENST00000467246	19	2791	MSTRG.4327	HPS1	GO:0005085(guanyl-nucleotide exchange factor activity);GO:0005515(protein binding);GO:0005737(cytoplasm);GO:0005764(lysosome);GO:0005829(cytosol);GO:0007040(lysosome organization);GO:0007601(visual perception);GO:0031085(BLOC-3 complex);GO:0031410(cytoplasmic vesicle);GO:0046983(protein dimerization activity);GO:0050896(response to stimulus);GO:1903232(melanosome assembly)	NA	K20193	NA	HPS1, biogenesis of lysosomal organelles complex 3 subunit 1 [Source:HGNC Symbol;Acc:HGNC:5163]	0.402478	0.469052	0.463645	0.676903	0	0	0.001949	0	1032.36	10.0117	7.66075e-08	4.12304e-05	up	yes
45917904	45995807	MSTRG.22692.3	17	8377	MSTRG.22692	FYCO1	NA	NA	NA	NA	NA	0	0	0	0	3.15429	1.8264	0	2.42751	-inf	-inf	8.57318e-08	4.57364e-05	down	yes
138089014	138178177	ENST00000510767	7	4654	MSTRG.25281	SLC7A11-AS1	NA	NA	NA	NA	SLC7A11 antisense RNA 1 [Source:HGNC Symbol;Acc:HGNC:44064]	1.98688	0.002512	1.55022	1.68771	0	0	0	0	inf	inf	8.69768e-08	4.59971e-05	up	yes
3565444	3609411	ENST00000572705	17	4166	MSTRG.13408	TRPV1	GO:0000122(negative regulation of transcription by RNA polymerase II);GO:0000166(nucleotide binding);GO:0001659(temperature homeostasis);GO:0001660(fever generation);GO:0001774(microglial cell activation);GO:0002024(diet induced thermogenesis);GO:0002790(peptide secretion);GO:0003085(negative regulation of systemic arterial blood pressure);GO:0004888(transmembrane signaling receptor activity);GO:…	04080(Neuroactive ligand-receptor interaction);04750(Inflammatory mediator regulation of TRP channels)	K05222	NA	transient receptor potential cation channel subfamily V member 1 [Source:HGNC Symbol;Acc:HGNC:12716]	0.314791	0.064369	1.20992	0.378054	0	0.001554	0.001237	0	704.813	9.4611	8.81268e-08	4.62035e-05	up	yes
15670110	15798184	ENST00000497037	28	3509	MSTRG.22403	ANKRD28	GO:0000139(Golgi membrane);GO:0005515(protein binding);GO:0005634(nucleus);GO:0005654(nucleoplasm);GO:0005829(cytosol);GO:0048208(COPII vesicle coating)	NA	K15502	NA	ankyrin repeat domain 28 [Source:HGNC Symbol;Acc:HGNC:29024]	1.34193	0	14.1036	6.89977	0	0	0	0	inf	inf	9.03077e-08	4.69423e-05	up	yes
203439437	203535335	ENST00000630330	16	4134	MSTRG.19797	RAPH1	GO:0005515(protein binding);GO:0005737(cytoplasm);GO:0005829(cytosol);GO:0005856(cytoskeleton);GO:0005886(plasma membrane);GO:0007165(signal transduction);GO:0016020(membrane);GO:0016604(nuclear body);GO:0030027(lamellipodium);GO:0030175(filopodium);GO:0031252(cell leading edge);GO:0042995(cell projection);GO:0048675(axon extension)	NA	NA	NA	Ras association (RalGDS/AF-6) and pleckstrin homology domains 1 [Source:HGNC Symbol;Acc:HGNC:14436]	0	0	0	0	0.361548	0.308319	0.218512	0.250992	-inf	-inf	9.32371e-08	4.80543e-05	down	yes
94584401	94665481	ENST00000380176	9	3098	MSTRG.24954	PDLIM5	GO:0003779(actin binding);GO:0005080(protein kinase C binding);GO:0005515(protein binding);GO:0005737(cytoplasm);GO:0005829(cytosol);GO:0005886(plasma membrane);GO:0005913(cell-cell adherens junction);GO:0014069(postsynaptic density);GO:0015629(actin cytoskeleton);GO:0016020(membrane);GO:0030054(cell junction);GO:0042805(actinin binding);GO:0043005(neuron projection);GO:0045202(synapse);GO:004521…	NA	NA	NA	PDZ and LIM domain 5 [Source:HGNC Symbol;Acc:HGNC:17468]	0	0	0	0	0.251392	0.067814	2.39572	0.246262	-inf	-inf	9.74583e-08	4.98077e-05	down	yes
57455307	57458025	ENST00000266646	2	2460	MSTRG.7501	INHBE	GO:0005125(cytokine activity);GO:0005160(transforming growth factor beta receptor binding);GO:0005179(hormone activity);GO:0005576(extracellular region);GO:0005615(extracellular space);GO:0008083(growth factor activity);GO:0010469(regulation of signaling receptor activity);GO:0010862(positive regulation of pathway-restricted SMAD protein phosphorylation);GO:0042981(regulation of apoptotic process…	04060(Cytokine-cytokine receptor interaction);04350(TGF-beta signaling pathway);04550(Signaling pathways regulating pluripotency of stem cells)	K22689	NA	inhibin subunit beta E [Source:HGNC Symbol;Acc:HGNC:24029]	17.7531	19.245	22.5766	21.5818	0.681861	0.784799	1.0485	0.913336	23.6712	4.56506	9.84045e-08	4.98722e-05	up	yes
69121110	69255180	MSTRG.32653.17	24	6182	MSTRG.32653	AL358113	NA	NA	NA	NA	NA	2.22477	5.91082	2.37904	1.47051	0.000964	6.2e-05	0.056326	0.013568	168.995	7.40084	1.00554e-07	5.05407e-05	up	yes
53665202	53677398	ENST00000338662	5	1792	MSTRG.7344	ATP5MC2	GO:0000276(mitochondrial proton-transporting ATP synthase complex, coupling factor F(o));GO:0005215(transporter activity);GO:0005515(protein binding);GO:0005739(mitochondrion);GO:0005741(mitochondrial outer membrane);GO:0005753(mitochondrial proton-transporting ATP synthase complex);GO:0006754(ATP biosynthetic process);GO:0006811(ion transport);GO:0008289(lipid binding);GO:0015078(proton transmem…	00190(Oxidative phosphorylation);04714(Thermogenesis);05010(Alzheimer disease);05012(Parkinson disease);05016(Huntington disease)	NA	NA	ATP synthase membrane subunit c locus 2 [Source:HGNC Symbol;Acc:HGNC:842]	0	0	0	0	9.91782	16.393	0	7.38821	-inf	-inf	1.0182e-07	5.07575e-05	down	yes
179836297	179877799	MSTRG.2550.1	9	2404	MSTRG.2550	TOR1AIP2	NA	NA	NA	NA	NA	0.672002	0.565722	2.89089	0.032131	0	0	0	0	inf	inf	1.06511e-07	5.26641e-05	up	yes
136028988	136063818	ENST00000442011	17	2712	MSTRG.26839	TGFBI	GO:0001525(angiogenesis);GO:0002062(chondrocyte differentiation);GO:0005178(integrin binding);GO:0005201(extracellular matrix structural constituent);GO:0005515(protein binding);GO:0005518(collagen binding);GO:0005576(extracellular region);GO:0005604(basement membrane);GO:0005615(extracellular space);GO:0005802(trans-Golgi network);GO:0005886(plasma membrane);GO:0007155(cell adhesion);GO:0007162(…	NA	K19519	NA	transforming growth factor beta induced [Source:HGNC Symbol;Acc:HGNC:11771]	48.4603	67.4067	52.4115	67.8235	3.35962	2.58909	2.74557	3.48603	19.3839	4.27679	1.09373e-07	5.36431e-05	up	yes
73375445	73408750	MSTRG.4000.2	13	2608	MSTRG.4000	ANXA7	NA	NA	NA	NA	NA	24.3257	21.4076	26.215	0.037282	0.026773	0.136265	0.026197	0.026841	333.149	8.38002	1.11716e-07	5.4354e-05	up	yes
18273921	18315007	ENST00000542570	19	4116	MSTRG.13767	TOP3A	GO:0003676(nucleic acid binding);GO:0003677(DNA binding);GO:0003697(single-stranded DNA binding);GO:0003916(DNA topoisomerase activity);GO:0003917(DNA topoisomerase type I activity);GO:0005515(protein binding);GO:0005634(nucleus);GO:0005654(nucleoplasm);GO:0005694(chromosome);GO:0005739(mitochondrion);GO:0005759(mitochondrial matrix);GO:0006260(DNA replication);GO:0006265(DNA topological change);…	03440(Homologous recombination);03460(Fanconi anemia pathway)	K03165	EC:5.6.2.1	DNA topoisomerase III alpha [Source:HGNC Symbol;Acc:HGNC:11992]	0	0	0.005179	0.001468	0.074391	0.447825	0.719009	0.546319	0.00371851	-8.07106	1.18636e-07	5.72624e-05	down	yes
160995211	161021152	ENST00000368026	10	4639	MSTRG.2315	F11R	GO:0001618(virus receptor activity);GO:0001817(regulation of cytokine production);GO:0005515(protein binding);GO:0005886(plasma membrane);GO:0005911(cell-cell junction);GO:0005923(bicellular tight junction);GO:0006954(inflammatory response);GO:0007155(cell adhesion);GO:0007179(transforming growth factor beta receptor signaling pathway);GO:0009314(response to radiation);GO:0016020(membrane);GO:001…	04514(Cell adhesion molecules (CAMs));04530(Tight junction);04670(Leukocyte transendothelial migration);05120(Epithelial cell signaling in Helicobacter pylori infection)	K06089	NA	F11 receptor [Source:HGNC Symbol;Acc:HGNC:14685]	0	0	0	0	0	5.5881	2.54665	4.28717	-inf	-inf	1.20944e-07	5.72647e-05	down	yes
34525654	34582860	ENST00000484716	23	6114	MSTRG.10470	GOLGA8B	GO:0000137(Golgi cis cisterna);GO:0005794(Golgi apparatus);GO:0005801(cis-Golgi network);GO:0005829(cytosol);GO:0007030(Golgi organization);GO:0016020(membrane);GO:0032580(Golgi cisterna membrane)	NA	NA	NA	golgin A8 family member B [Source:HGNC Symbol;Acc:HGNC:31973]	4.17477	0	2.49372	5.8818	0.000691	0	0	0	18162.5	14.1487	1.21165e-07	5.72647e-05	up	yes
2652649	2655512	ENST00000445139	6	856	MSTRG.20203	NOP56	GO:0001650(fibrillar center);GO:0003723(RNA binding);GO:0005515(protein binding);GO:0005634(nucleus);GO:0005654(nucleoplasm);GO:0005730(nucleolus);GO:0005732(small nucleolar ribonucleoprotein complex);GO:0005737(cytoplasm);GO:0006364(rRNA processing);GO:0016020(membrane);GO:0030515(snoRNA binding);GO:0031428(box C/D snoRNP complex);GO:0032040(small-subunit processome);GO:0042254(ribosome biogenes…	03008(Ribosome biogenesis in eukaryotes)	K14564	NA	NOP56 ribonucleoprotein [Source:HGNC Symbol;Acc:HGNC:15911]	0	0	0	0	0	21.0262	21.6968	20.6402	-inf	-inf	1.21465e-07	5.72647e-05	down	yes
36187091	36277056	MSTRG.32525.1	13	4544	MSTRG.32525	GNE	NA	NA	NA	NA	NA	0	0	0	0	0	3.95877	4.23403	3.39769	-inf	-inf	1.32921e-07	6.21835e-05	down	yes
28974772	28984548	ENST00000565975	13	1979	MSTRG.12380	SPNS1	GO:0005515(protein binding);GO:0005739(mitochondrion);GO:0005743(mitochondrial inner membrane);GO:0005765(lysosomal membrane);GO:0006869(lipid transport);GO:0016020(membrane);GO:0016021(integral component of membrane);GO:0055085(transmembrane transport)	NA	NA	NA	sphingolipid transporter 1 (putative) [Source:HGNC Symbol;Acc:HGNC:30621]	0.019794	0.004476	0.0146	0.025366	1.10777	1.31886	0.731658	0.83171	0.0160993	-5.95686	1.46957e-07	6.8225e-05	down	yes
66848513	66907901	ENST00000393955	21	4004	MSTRG.5646	PC	GO:0000166(nucleotide binding);GO:0003824(catalytic activity);GO:0004736(pyruvate carboxylase activity);GO:0005515(protein binding);GO:0005524(ATP binding);GO:0005737(cytoplasm);GO:0005739(mitochondrion);GO:0005759(mitochondrial matrix);GO:0005829(cytosol);GO:0006090(pyruvate metabolic process);GO:0006094(gluconeogenesis);GO:0006629(lipid metabolic process);GO:0006768(biotin metabolic process);GO…	00020(Citrate cycle (TCA cycle));00620(Pyruvate metabolism)	K01958	EC:6.4.1.1	pyruvate carboxylase [Source:HGNC Symbol;Acc:HGNC:8636]	0	0	0.001815	0.012633	0.666437	1.16177	0.561757	0.563886	0.00489125	-7.67558	1.64547e-07	7.58123e-05	down	yes
56341613	56360100	ENST00000651078	22	4985	MSTRG.7452	STAT2	GO:0000981(DNA-binding transcription factor activity, RNA polymerase II-specific);GO:0001932(regulation of protein phosphorylation);GO:0003677(DNA binding);GO:0003700(DNA-binding transcription factor activity);GO:0005515(protein binding);GO:0005634(nucleus);GO:0005654(nucleoplasm);GO:0005737(cytoplasm);GO:0005829(cytosol);GO:0005886(plasma membrane);GO:0006355(regulation of transcription, DNA-tem…	04062(Chemokine signaling pathway);04217(Necroptosis);04380(Osteoclast differentiation);04621(NOD-like receptor signaling pathway);04625(C-type lectin receptor signaling pathway);04630(Jak-STAT signaling pathway);05160(Hepatitis C);05161(Hepatitis B);05162(Measles);05164(Influenza A);05165(Human papillomavirus infection);05167(Kaposi sarcoma-associated herpesvirus infection);05168(Herpes simplex …	K11221	NA	signal transducer and activator of transcription 2 [Source:HGNC Symbol;Acc:HGNC:11363]	0	0	0	0	3.97582	2.93313	2.73753	0	-inf	-inf	1.65918e-07	7.58695e-05	down	yes
1368979	1393172	ENST00000439640	4	1583	MSTRG.20194	FKBP1A	GO:0000413(protein peptidyl-prolyl isomerization);GO:0003007(heart morphogenesis);GO:0003755(peptidyl-prolyl cis-trans isomerase activity);GO:0005160(transforming growth factor beta receptor binding);GO:0005515(protein binding);GO:0005527(macrolide binding);GO:0005528(FK506 binding);GO:0005737(cytoplasm);GO:0005829(cytosol);GO:0006457(protein folding);GO:0006458('de novo' protein folding);GO:0007…	NA	NA	NA	FKBP prolyl isomerase 1A [Source:HGNC Symbol;Acc:HGNC:3711]	0	0	0	0	17.9928	0	2.7575	22.3331	-inf	-inf	1.69377e-07	7.6873e-05	down	yes
61950351	61967630	MSTRG.5412.2	13	3545	MSTRG.5412	BEST1	NA	NA	NA	NA	NA	1.27725	0.327465	0.007057	1.05565	0	0	0	0	inf	inf	1.73079e-07	7.79714e-05	up	yes
35104121	35111588	ENST00000603301	9	3256	MSTRG.32476	FAM214B	GO:0005515(protein binding);GO:0005634(nucleus)	NA	NA	NA	family with sequence similarity 214 member B [Source:HGNC Symbol;Acc:HGNC:25666]	0.278887	0.331844	0.451014	0.223973	0	0	0	0	inf	inf	1.76869e-07	7.9093e-05	up	yes
107628535	107651026	MSTRG.34268.9	6	1861	MSTRG.34268	PRPS1	NA	NA	NA	NA	NA	4.79324	0	6.72349	12.154	0	0	0	0	inf	inf	1.83467e-07	8.09246e-05	up	yes
22710965	22913743	ENST00000374630	16	3152	MSTRG.459	EPHB2	GO:0000166(nucleotide binding);GO:0000902(cell morphogenesis);GO:0001525(angiogenesis);GO:0001540(amyloid-beta binding);GO:0001655(urogenital system development);GO:0001933(negative regulation of protein phosphorylation);GO:0004672(protein kinase activity);GO:0004713(protein tyrosine kinase activity);GO:0004714(transmembrane receptor protein tyrosine kinase activity);GO:0005003(ephrin receptor ac…	04360(Axon guidance)	NA	NA	EPH receptor B2 [Source:HGNC Symbol;Acc:HGNC:3393]	0.066466	0.150959	2.80981	0.347207	0	0	0	0	inf	inf	1.8473e-07	8.09246e-05	up	yes
47971127	47981772	ENST00000580287	13	2609	MSTRG.14654	CDK5RAP3	GO:0000079(regulation of cyclin-dependent protein serine/threonine kinase activity);GO:0001933(negative regulation of protein phosphorylation);GO:0005515(protein binding);GO:0005634(nucleus);GO:0005730(nucleolus);GO:0005737(cytoplasm);GO:0005813(centrosome);GO:0005815(microtubule organizing center);GO:0005829(cytosol);GO:0005856(cytoskeleton);GO:0005874(microtubule);GO:0007095(mitotic G2 DNA dama…	NA	NA	NA	CDK5 regulatory subunit associated protein 3 [Source:HGNC Symbol;Acc:HGNC:18673]	0	0	0	0	0.296433	0.49249	0.58436	0.320077	-inf	-inf	1.8553e-07	8.09246e-05	down	yes
155659468	155773420	MSTRG.2234.35	5	3779	MSTRG.2234	GON4L	NA	NA	NA	NA	NA	0	0	2.5e-05	0	2.18093	10.2054	0	9.46008	1.14435e-06	-19.737	1.86288e-07	8.09246e-05	down	yes
161606806	161637172	MSTRG.23752.4	2	10222	MSTRG.23752	.	NA	NA	NA	NA	NA	0	0	0	0	2.89035	1.41999	0.797079	0	-inf	-inf	1.87985e-07	8.10829e-05	down	yes
53055039	53121980	ENST00000561869	2	720	MSTRG.12620	CHD9	GO:0000166(nucleotide binding);GO:0003677(DNA binding);GO:0004386(helicase activity);GO:0005515(protein binding);GO:0005524(ATP binding);GO:0005634(nucleus);GO:0005654(nucleoplasm);GO:0005737(cytoplasm);GO:0006325(chromatin organization);GO:0016787(hydrolase activity);GO:0016817(hydrolase activity, acting on acid anhydrides);GO:0019216(regulation of lipid metabolic process)	NA	K14438	EC:3.6.4.12	chromodomain helicase DNA binding protein 9 [Source:HGNC Symbol;Acc:HGNC:25701]	0	0	0	0	0.371021	2.15221	2.08447	2.7703	-inf	-inf	1.8956e-07	8.11864e-05	down	yes
15667236	15798184	ENST00000624145	28	6383	MSTRG.22403	ANKRD28	GO:0000139(Golgi membrane);GO:0005515(protein binding);GO:0005634(nucleus);GO:0005654(nucleoplasm);GO:0005829(cytosol);GO:0048208(COPII vesicle coating)	NA	K15502	NA	ankyrin repeat domain 28 [Source:HGNC Symbol;Acc:HGNC:29024]	0.974945	0	2.00956	4.61625	0	0	0	0	inf	inf	2.04459e-07	8.69551e-05	up	yes
228393683	228406800	MSTRG.3093.3	6	2665	MSTRG.3093	TRIM11	NA	NA	NA	NA	NA	6.75363	5.00621	3.6286	0	0	0	0	0	inf	inf	2.21981e-07	9.37517e-05	up	yes
44397416	44503430	MSTRG.14512.6	11	4819	MSTRG.14512	GPATCH8	NA	NA	NA	NA	NA	4.85601	0	5.41234	0.653554	0	0	0	0	inf	inf	2.48277e-07	0.000104134	up	yes
10086340	10092927	ENST00000591813	8	1481	MSTRG.16471	C19orf66	GO:0003723(RNA binding);GO:0005515(protein binding);GO:0005634(nucleus);GO:0005654(nucleoplasm);GO:0005737(cytoplasm);GO:0005829(cytosol);GO:0034340(response to type I interferon);GO:0034341(response to interferon-gamma);GO:0034342(response to type III interferon);GO:0045071(negative regulation of viral genome replication);GO:0051607(defense response to virus)	NA	NA	NA	chromosome 19 open reading frame 66 [Source:HGNC Symbol;Acc:HGNC:25649]	0	0	0	0	0.816879	0.840912	0.431459	0.768052	-inf	-inf	2.50461e-07	0.000104331	down	yes
41582279	41586895	ENST00000167586	8	1636	MSTRG.14343	KRT14	GO:0005198(structural molecule activity);GO:0005200(structural constituent of cytoskeleton);GO:0005515(protein binding);GO:0005634(nucleus);GO:0005737(cytoplasm);GO:0005829(cytosol);GO:0005882(intermediate filament);GO:0007568(aging);GO:0008544(epidermis development);GO:0010043(response to zinc ion);GO:0010212(response to ionizing radiation);GO:0030855(epithelial cell differentiation);GO:0031424(…	04915(Estrogen signaling pathway)	K07604	NA	keratin 14 [Source:HGNC Symbol;Acc:HGNC:6416]	1.20568	0.836753	1.23202	0.81451	0	0.025536	0	0	160.125	7.32306	2.5674e-07	0.000106219	up	yes
6570088	6607582	ENST00000642810	40	6630	MSTRG.6634	CHD4	GO:0000122(negative regulation of transcription by RNA polymerase II);GO:0000166(nucleotide binding);GO:0000790(nuclear chromatin);GO:0000978(RNA polymerase II proximal promoter sequence-specific DNA binding);GO:0000980(RNA polymerase II distal enhancer sequence-specific DNA binding);GO:0001103(RNA polymerase II repressing transcription factor binding);GO:0003677(DNA binding);GO:0004003(ATP-depen…	05165(Human papillomavirus infection);05203(Viral carcinogenesis)	NA	NA	chromodomain helicase DNA binding protein 4 [Source:HGNC Symbol;Acc:HGNC:1919]	0	0	0	0	2.17284	1.83938	1.76901	0	-inf	-inf	2.60165e-07	0.00010671	down	yes
23246642	23261992	ENST00000517325	10	2639	MSTRG.31092	CHMP7	GO:0000785(chromatin);GO:0000815(ESCRT III complex);GO:0005515(protein binding);GO:0005634(nucleus);GO:0005635(nuclear envelope);GO:0005737(cytoplasm);GO:0005829(cytosol);GO:0006997(nucleus organization);GO:0007034(vacuolar transport);GO:0007080(mitotic metaphase plate congression);GO:0008565(protein transporter activity);GO:0010458(exit from mitosis);GO:0015031(protein transport);GO:0016197(endo…	04144(Endocytosis);04217(Necroptosis)	K15053	NA	charged multivesicular body protein 7 [Source:HGNC Symbol;Acc:HGNC:28439]	0	0	0	0	4.83907	4.36074	0	5.10349	-inf	-inf	2.63043e-07	0.00010671	down	yes
36826860	36908518	MSTRG.22546.6	23	10390	MSTRG.22546	TRANK1	NA	NA	NA	NA	NA	0	0	0	0	1.01796	0	1.72129	1.13638	-inf	-inf	2.63192e-07	0.00010671	down	yes
44702520	44737215	ENST00000477331	7	1041	MSTRG.22106	PRR5	GO:0001934(positive regulation of protein phosphorylation);GO:0005515(protein binding);GO:0005829(cytosol);GO:0007049(cell cycle);GO:0014068(positive regulation of phosphatidylinositol 3-kinase signaling);GO:0031932(TORC2 complex);GO:0032148(activation of protein kinase B activity);GO:0038203(TORC2 signaling)	04150(mTOR signaling pathway)	K20411	NA	proline rich 5 [Source:HGNC Symbol;Acc:HGNC:31682]	0	0	0	0	1.14546	0.327422	1.02435	2.15514	-inf	-inf	2.75593e-07	0.000110998	down	yes
67847211	67872567	MSTRG.12835.6	6	2276	MSTRG.12835	NUTF2	NA	NA	NA	NA	NA	0	0	0	0	0	5.16315	5.21673	5.66459	-inf	-inf	2.89759e-07	0.000115936	down	yes
93446905	93453257	ENST00000483149	3	1432	MSTRG.32841	FAM120AOS	NA	NA	NA	NA	family with sequence similarity 120A opposite strand [Source:HGNC Symbol;Acc:HGNC:23389]	0.829157	0.349972	0.681178	0.954702	0	0	0	0	inf	inf	2.97062e-07	0.000118081	up	yes
152121687	152637362	ENST00000367255	146	27708	MSTRG.29105	SYNE1	GO:0000932(P-body);GO:0003723(RNA binding);GO:0003779(actin binding);GO:0005515(protein binding);GO:0005521(lamin binding);GO:0005634(nucleus);GO:0005635(nuclear envelope);GO:0005640(nuclear outer membrane);GO:0005654(nucleoplasm);GO:0005730(nucleolus);GO:0005737(cytoplasm);GO:0005794(Golgi apparatus);GO:0005856(cytoskeleton);GO:0006997(nucleus organization);GO:0007030(Golgi organization);GO:0007…	NA	K19326	NA	spectrin repeat containing nuclear envelope protein 1 [Source:HGNC Symbol;Acc:HGNC:17089]	0	0	0	0	0.762964	0.253106	0	0.445696	-inf	-inf	3.06027e-07	0.000120451	down	yes
6877777	6898239	ENST00000382040	6	3407	MSTRG.17839	RSAD2	GO:0001650(fibrillar center);GO:0002376(immune system process);GO:0003824(catalytic activity);GO:0005515(protein binding);GO:0005739(mitochondrion);GO:0005741(mitochondrial outer membrane);GO:0005743(mitochondrial inner membrane);GO:0005783(endoplasmic reticulum);GO:0005789(endoplasmic reticulum membrane);GO:0005794(Golgi apparatus);GO:0005811(lipid droplet);GO:0009615(response to virus);GO:00160…	05160(Hepatitis C);05164(Influenza A)	K15045	NA	radical S-adenosyl methionine domain containing 2 [Source:HGNC Symbol;Acc:HGNC:30908]	0.111175	0.111127	0.03149	0.073598	3.65996	4.25244	4.02389	3.44751	0.0212815	-5.55426	3.06985e-07	0.000120451	down	yes
34525654	34582844	MSTRG.10470.37	24	5526	MSTRG.10470	GOLGA8B	NA	NA	NA	NA	NA	2.31533	0	2.67785	1.08405	0	0	0	0	inf	inf	3.15261e-07	0.000122468	up	yes
35104142	35111423	ENST00000378557	9	3070	MSTRG.32476	FAM214B	GO:0005515(protein binding);GO:0005634(nucleus)	NA	NA	NA	family with sequence similarity 214 member B [Source:HGNC Symbol;Acc:HGNC:25666]	0.200502	0.295967	0.638135	0.229528	0	0	0	0	inf	inf	3.16154e-07	0.000122468	up	yes
96352777	96389922	ENST00000644686	9	4213	MSTRG.6083	CCDC82	NA	NA	NA	NA	coiled-coil domain containing 82 [Source:HGNC Symbol;Acc:HGNC:26282]	0.36481	1.0877	0.202648	0.007642	0	0	0	0	inf	inf	3.30094e-07	0.000126613	up	yes
38483438	38506311	ENST00000403230	13	4761	MSTRG.21950	DDX17	GO:0000166(nucleotide binding);GO:0000380(alternative mRNA splicing, via spliceosome);GO:0000381(regulation of alternative mRNA splicing, via spliceosome);GO:0001837(epithelial to mesenchymal transition);GO:0002376(immune system process);GO:0003676(nucleic acid binding);GO:0003713(transcription coactivator activity);GO:0003723(RNA binding);GO:0003724(RNA helicase activity);GO:0004386(helicase act…	NA	K13178	EC:3.6.4.13	DEAD-box helicase 17 [Source:HGNC Symbol;Acc:HGNC:2740]	0.000553	0.000412	0.000296	0.000545	49.9099	0.000202	65.486	0.00022	1.56504e-05	-15.9634	3.31018e-07	0.000126613	down	yes
218659683	218663443	ENST00000392111	9	1636	MSTRG.19923	BCS1L	GO:0000166(nucleotide binding);GO:0005515(protein binding);GO:0005524(ATP binding);GO:0005739(mitochondrion);GO:0005743(mitochondrial inner membrane);GO:0005750(mitochondrial respiratory chain complex III);GO:0007005(mitochondrion organization);GO:0016020(membrane);GO:0016021(integral component of membrane);GO:0032981(mitochondrial respiratory chain complex I assembly);GO:0033617(mitochondrial re…	NA	NA	NA	BCS1 homolog, ubiquinol-cytochrome c reductase complex chaperone [Source:HGNC Symbol;Acc:HGNC:1020]	6.4e-05	0.895965	1.91846	2.76944	0	0	0	0	inf	inf	3.38225e-07	0.000128562	up	yes
136028991	136063816	ENST00000506699	17	3159	MSTRG.26839	TGFBI	GO:0001525(angiogenesis);GO:0002062(chondrocyte differentiation);GO:0005178(integrin binding);GO:0005201(extracellular matrix structural constituent);GO:0005515(protein binding);GO:0005518(collagen binding);GO:0005576(extracellular region);GO:0005604(basement membrane);GO:0005615(extracellular space);GO:0005802(trans-Golgi network);GO:0005886(plasma membrane);GO:0007155(cell adhesion);GO:0007162(…	NA	K19519	NA	transforming growth factor beta induced [Source:HGNC Symbol;Acc:HGNC:11771]	2.22103	3.08341	3.90057	1.95015	0.045455	0.009902	0	0	201.513	7.65473	4.03065e-07	0.000152256	up	yes
135052299	135176660	MSTRG.19169.5	24	3385	MSTRG.19169	RAB3GAP1	NA	NA	NA	NA	NA	0.263278	3.82487	4.20913	0.000918	0	0	0	0	inf	inf	4.07886e-07	0.000153126	up	yes
162267074	162318684	ENST00000649979	16	3581	MSTRG.19354	IFIH1	GO:0000166(nucleotide binding);GO:0002376(immune system process);GO:0003677(DNA binding);GO:0003723(RNA binding);GO:0003725(double-stranded RNA binding);GO:0003727(single-stranded RNA binding);GO:0004386(helicase activity);GO:0005515(protein binding);GO:0005524(ATP binding);GO:0005634(nucleus);GO:0005737(cytoplasm);GO:0005829(cytosol);GO:0008270(zinc ion binding);GO:0009597(detection of virus);GO…	04622(RIG-I-like receptor signaling pathway);05161(Hepatitis B);05162(Measles);05164(Influenza A);05168(Herpes simplex virus 1 infection)	K12647	EC:3.6.4.13	interferon induced with helicase C domain 1 [Source:HGNC Symbol;Acc:HGNC:18873]	0	0	0	0	3.85793	0.040555	4.8504	0.019757	-inf	-inf	4.12674e-07	0.000153973	down	yes
44010726	44031462	ENST00000466926	4	591	MSTRG.917	SLC6A9	GO:0003333(amino acid transmembrane transport);GO:0005283(amino acid:sodium symporter activity);GO:0005328(neurotransmitter:sodium symporter activity);GO:0005886(plasma membrane);GO:0005887(integral component of plasma membrane);GO:0006836(neurotransmitter transport);GO:0006865(amino acid transport);GO:0014069(postsynaptic density);GO:0015187(glycine transmembrane transporter activity);GO:0015293…	04721(Synaptic vesicle cycle)	NA	NA	solute carrier family 6 member 9 [Source:HGNC Symbol;Acc:HGNC:11056]	1.55478	1.89057	1.27807	1.34066	0	0	0	0	inf	inf	4.36571e-07	0.000161896	up	yes
82820477	83162930	ENST00000423517	20	17147	ENSG00000186472	PCLO	GO:0005509(calcium ion binding);GO:0005515(protein binding);GO:0005522(profilin binding);GO:0005544(calcium-dependent phospholipid binding);GO:0005856(cytoskeleton);GO:0007010(cytoskeleton organization);GO:0007416(synapse assembly);GO:0014069(postsynaptic density);GO:0016020(membrane);GO:0016021(integral component of membrane);GO:0016079(synaptic vesicle exocytosis);GO:0017157(regulation of exocy…	04911(Insulin secretion)	K16882	NA	piccolo presynaptic cytomatrix protein [Source:HGNC Symbol;Acc:HGNC:13406]	0	0.660873	0.373826	0.509408	0	0	0	0	inf	inf	4.87894e-07	0.000179832	up	yes
11553047	11555467	ENST00000587806	5	1172	MSTRG.16549	ELOF1	GO:0000993(RNA polymerase II complex binding);GO:0003746(translation elongation factor activity);GO:0005515(protein binding);GO:0005634(nucleus);GO:0006368(transcription elongation from RNA polymerase II promoter);GO:0006414(translational elongation);GO:0008023(transcription elongation factor complex);GO:0046872(metal ion binding);GO:0048096(chromatin-mediated maintenance of transcription)	NA	NA	NA	elongation factor 1 homolog [Source:HGNC Symbol;Acc:HGNC:28691]	0	0	0	0	12.717	2.71223	17.0457	0	-inf	-inf	5.04331e-07	0.000184771	down	yes
76310934	76354198	ENST00000324684	10	1678	MSTRG.15204	PRPSAP1	GO:0000287(magnesium ion binding);GO:0002189(ribose phosphate diphosphokinase complex);GO:0004749(ribose phosphate diphosphokinase activity);GO:0004857(enzyme inhibitor activity);GO:0005515(protein binding);GO:0005737(cytoplasm);GO:0006015(5-phosphoribose 1-diphosphate biosynthetic process);GO:0006139(nucleobase-containing compound metabolic process);GO:0006164(purine nucleotide biosynthetic proc…	NA	NA	NA	phosphoribosyl pyrophosphate synthetase associated protein 1 [Source:HGNC Symbol;Acc:HGNC:9466]	0	0	0.00995	0	17.5142	0	13.568	13.9985	0.000220715	-12.1455	5.1132e-07	0.000185151	down	yes
88378739	88443097	ENST00000380265	22	3781	MSTRG.24909	HERC6	GO:0000209(protein polyubiquitination);GO:0002244(hematopoietic progenitor cell differentiation);GO:0004842(ubiquitin-protein transferase activity);GO:0005634(nucleus);GO:0005737(cytoplasm);GO:0005829(cytosol);GO:0009617(response to bacterium);GO:0016567(protein ubiquitination);GO:0016740(transferase activity)	NA	K22372	EC:2.3.2.-	HECT and RLD domain containing E3 ubiquitin protein ligase family member 6 [Source:HGNC Symbol;Acc:HGNC:26072]	0.726042	0.791957	0.591591	1.00504	0.01367	0	0.021596	0.00809	71.8384	6.16668	5.1146e-07	0.000185151	up	yes
57551662	57567672	ENST00000287156	4	1219	ENSG00000156587	UBE2L6	GO:0000151(ubiquitin ligase complex);GO:0000166(nucleotide binding);GO:0004842(ubiquitin-protein transferase activity);GO:0005515(protein binding);GO:0005524(ATP binding);GO:0005654(nucleoplasm);GO:0005829(cytosol);GO:0006464(cellular protein modification process);GO:0006511(ubiquitin-dependent protein catabolic process);GO:0016567(protein ubiquitination);GO:0016740(transferase activity);GO:00197…	04120(Ubiquitin mediated proteolysis);05012(Parkinson disease)	K04553	EC:2.3.2.23	ubiquitin conjugating enzyme E2 L6 [Source:HGNC Symbol;Acc:HGNC:12490]	0	0	0	0	0.55208	0.614176	0.721098	1.25089	-inf	-inf	5.26395e-07	0.000188733	down	yes
152121780	152179463	ENST00000347037	19	3798	MSTRG.29105	SYNE1	GO:0000932(P-body);GO:0003723(RNA binding);GO:0003779(actin binding);GO:0005515(protein binding);GO:0005521(lamin binding);GO:0005634(nucleus);GO:0005635(nuclear envelope);GO:0005640(nuclear outer membrane);GO:0005654(nucleoplasm);GO:0005730(nucleolus);GO:0005737(cytoplasm);GO:0005794(Golgi apparatus);GO:0005856(cytoskeleton);GO:0006997(nucleus organization);GO:0007030(Golgi organization);GO:0007…	NA	K19326	NA	spectrin repeat containing nuclear envelope protein 1 [Source:HGNC Symbol;Acc:HGNC:17089]	0	2.13004	2.03447	1.98949	0	0	0	0	inf	inf	5.2756e-07	0.000188733	up	yes
43528337	43545899	ENST00000591713	13	1727	MSTRG.14433	ETV4	GO:0000978(RNA polymerase II proximal promoter sequence-specific DNA binding);GO:0000981(DNA-binding transcription factor activity, RNA polymerase II-specific);GO:0001228(DNA-binding transcription activator activity, RNA polymerase II-specific);GO:0003677(DNA binding);GO:0003700(DNA-binding transcription factor activity);GO:0005515(protein binding);GO:0005634(nucleus);GO:0005654(nucleoplasm);GO:0…	05202(Transcriptional misregulation in cancer)	K15592	NA	ETS variant 4 [Source:HGNC Symbol;Acc:HGNC:3493]	0.40596	0.565679	0.566714	0.462257	0	0	0	0	inf	inf	5.33641e-07	0.000189792	up	yes
23399233	23416071	ENST00000600643	5	2387	MSTRG.16932	LINC01224	NA	NA	NA	NA	long intergenic non-protein coding RNA 1224 [Source:HGNC Symbol;Acc:HGNC:49676]	0	0.00249	0	0	1.23045	2.39501	0.069792	0.127895	0.000651294	-10.5844	5.49807e-07	0.000194405	down	yes
190649134	190690919	MSTRG.19661.11	10	2625	MSTRG.19661	NAB1	NA	NA	NA	NA	NA	2.27916	0	2.29064	5.28747	0	0	0	0	inf	inf	5.56262e-07	0.000195026	up	yes
43873275	43924309	ENST00000449926	14	2042	MSTRG.10718	FRMD5	GO:0005178(integrin binding);GO:0005515(protein binding);GO:0005856(cytoskeleton);GO:0005912(adherens junction);GO:0008092(cytoskeletal protein binding);GO:0016020(membrane);GO:0016021(integral component of membrane);GO:0019901(protein kinase binding);GO:0030054(cell junction);GO:0030334(regulation of cell migration);GO:0031032(actomyosin structure organization);GO:0045785(positive regulation of …	NA	NA	NA	FERM domain containing 5 [Source:HGNC Symbol;Acc:HGNC:28214]	0.402311	1.17696	0.224066	0.290568	0	0	0	0	inf	inf	5.59891e-07	0.000195026	up	yes
77895489	77918810	ENST00000334286	7	4277	MSTRG.8874	EDNRB	GO:0000122(negative regulation of transcription by RNA polymerase II);GO:0001755(neural crest cell migration);GO:0001934(positive regulation of protein phosphorylation);GO:0004930(G protein-coupled receptor activity);GO:0004962(endothelin receptor activity);GO:0005515(protein binding);GO:0005886(plasma membrane);GO:0005887(integral component of plasma membrane);GO:0006885(regulation of pH);GO:000…	04020(Calcium signaling pathway);04022(cGMP-PKG signaling pathway);04080(Neuroactive ligand-receptor interaction);04916(Melanogenesis);04926(Relaxin signaling pathway);05200(Pathways in cancer)	K04198	NA	endothelin receptor type B [Source:HGNC Symbol;Acc:HGNC:3180]	0	0	0	0	0.150233	0.197716	0.289542	0.222633	-inf	-inf	5.63331e-07	0.000195026	down	yes
103297456	103312351	MSTRG.30316.6	12	1485	MSTRG.30316	PMPCB	NA	NA	NA	NA	NA	0	0	0	0	4.56817	5.21041	8.24511	0	-inf	-inf	5.64391e-07	0.000195026	down	yes
107201555	107564040	ENST00000347053	21	4532	MSTRG.30368	COG5	GO:0000139(Golgi membrane);GO:0003674(molecular_function);GO:0005515(protein binding);GO:0005654(nucleoplasm);GO:0005737(cytoplasm);GO:0005794(Golgi apparatus);GO:0005829(cytosol);GO:0006888(endoplasmic reticulum to Golgi vesicle-mediated transport);GO:0006891(intra-Golgi vesicle-mediated transport);GO:0015031(protein transport);GO:0016020(membrane);GO:0017119(Golgi transport complex);GO:0032588(…	NA	K20292	NA	component of oligomeric golgi complex 5 [Source:HGNC Symbol;Acc:HGNC:14857]	1.4733	0	1.41502	2.04413	0	0	0	0	inf	inf	5.70548e-07	0.00019604	up	yes
24643559	24669508	ENST00000596378	15	2314	MSTRG.509	SRRM1	GO:0000375(RNA splicing, via transesterification reactions);GO:0000398(mRNA splicing, via spliceosome);GO:0003677(DNA binding);GO:0003723(RNA binding);GO:0005515(protein binding);GO:0005634(nucleus);GO:0005654(nucleoplasm);GO:0005681(spliceosomal complex);GO:0005829(cytosol);GO:0006397(mRNA processing);GO:0006405(RNA export from nucleus);GO:0006406(mRNA export from nucleus);GO:0008380(RNA splicin…	03013(RNA transport);03015(mRNA surveillance pathway)	K13171	NA	serine and arginine repetitive matrix 1 [Source:HGNC Symbol;Acc:HGNC:16638]	0.043999	0.049268	0.052323	0.012948	1.54243	9.03105	0.355624	10.0961	0.00754038	-7.05115	6.64117e-07	0.000224813	down	yes
46104396	46128330	ENST00000591715	9	1098	MSTRG.15845	HAUS1	GO:0000086(G2/M transition of mitotic cell cycle);GO:0000922(spindle pole);GO:0003674(molecular_function);GO:0005515(protein binding);GO:0005737(cytoplasm);GO:0005813(centrosome);GO:0005815(microtubule organizing center);GO:0005819(spindle);GO:0005829(cytosol);GO:0005856(cytoskeleton);GO:0005874(microtubule);GO:0007049(cell cycle);GO:0007098(centrosome cycle);GO:0010389(regulation of G2/M transit…	NA	K16584	NA	HAUS augmin like complex subunit 1 [Source:HGNC Symbol;Acc:HGNC:25174]	0.056224	0.125384	0	0.00508	4.64798	5.58305	7.37542	6.39703	0.00777754	-7.00647	6.64497e-07	0.000224813	down	yes
69841212	69860145	ENST00000226444	8	1773	ENSG00000109193	SULT1E1	GO:0004304(estrone sulfotransferase activity);GO:0005496(steroid binding);GO:0005515(protein binding);GO:0005737(cytoplasm);GO:0005829(cytosol);GO:0006068(ethanol catabolic process);GO:0006711(estrogen catabolic process);GO:0008146(sulfotransferase activity);GO:0008202(steroid metabolic process);GO:0008210(estrogen metabolic process);GO:0008289(lipid binding);GO:0016740(transferase activity);GO:0…	00140(Steroid hormone biosynthesis)	K01016	EC:2.8.2.4	sulfotransferase family 1E member 1 [Source:HGNC Symbol;Acc:HGNC:11377]	0.443182	0.535997	1.09642	0.188758	0	0	0	0	inf	inf	6.65378e-07	0.000224813	up	yes
15522810	15662945	MSTRG.27559.3	9	1274	MSTRG.27559	DTNBP1	NA	NA	NA	NA	NA	7.29945	0	2.50148	10.1987	0	0	0	0	inf	inf	6.70528e-07	0.000225301	up	yes
125232328	125375249	MSTRG.23328.6	9	2774	MSTRG.23328	ZNF148	NA	NA	NA	NA	NA	4.50168	0	1.14685	3.62787	0	0	0	0	inf	inf	6.77158e-07	0.000226279	up	yes
35626159	35664877	ENST00000401607	16	1795	MSTRG.20579	CPNE1	GO:0001786(phosphatidylserine binding);GO:0004175(endopeptidase activity);GO:0005215(transporter activity);GO:0005509(calcium ion binding);GO:0005515(protein binding);GO:0005544(calcium-dependent phospholipid binding);GO:0005634(nucleus);GO:0005654(nucleoplasm);GO:0005737(cytoplasm);GO:0005829(cytosol);GO:0005886(plasma membrane);GO:0006508(proteolysis);GO:0006629(lipid metabolic process);GO:0010…	NA	NA	NA	copine 1 [Source:HGNC Symbol;Acc:HGNC:2314]	4.87371	0	5.13574	2.22868	0	0	0	0	inf	inf	6.81712e-07	0.000226556	up	yes
21650928	21704767	ENST00000580981	7	1836	MSTRG.15647	ABHD3	GO:0004623(phospholipase A2 activity);GO:0005575(cellular_component);GO:0005886(plasma membrane);GO:0006629(lipid metabolic process);GO:0006656(phosphatidylcholine biosynthetic process);GO:0008970(phospholipase A1 activity);GO:0016020(membrane);GO:0016021(integral component of membrane);GO:0016298(lipase activity);GO:0016787(hydrolase activity);GO:0034338(short-chain carboxylesterase activity);GO…	NA	K13696	NA	abhydrolase domain containing 3 [Source:HGNC Symbol;Acc:HGNC:18718]	0	3.951	4.32168	2.77588	0	0	0	0	inf	inf	6.91031e-07	0.000228405	up	yes
44619579	44651661	MSTRG.20680.3	12	1374	MSTRG.20680	ADA	NA	NA	NA	NA	NA	3.24236	0	4.48241	6.87218	0	0	0	0	inf	inf	7.11071e-07	0.000232757	up	yes
53538430	53580269	ENST00000648122	6	3975	MSTRG.17641	ZNF331	GO:0000981(DNA-binding transcription factor activity, RNA polymerase II-specific);GO:0003676(nucleic acid binding);GO:0003677(DNA binding);GO:0005622(intracellular);GO:0005634(nucleus);GO:0006355(regulation of transcription, DNA-templated);GO:0006357(regulation of transcription by RNA polymerase II);GO:0008270(zinc ion binding);GO:0046872(metal ion binding)	05168(Herpes simplex virus 1 infection)	K09228	NA	zinc finger protein 331 [Source:HGNC Symbol;Acc:HGNC:15489]	0	0	0	0	0	1.73558	1.96539	1.83439	-inf	-inf	7.11854e-07	0.000232757	down	yes
34928433	34955785	ENST00000646735	10	1554	MSTRG.20559	GSS	GO:0000166(nucleotide binding);GO:0000287(magnesium ion binding);GO:0004363(glutathione synthase activity);GO:0005515(protein binding);GO:0005524(ATP binding);GO:0005829(cytosol);GO:0006520(cellular amino acid metabolic process);GO:0006750(glutathione biosynthetic process);GO:0006979(response to oxidative stress);GO:0007399(nervous system development);GO:0007568(aging);GO:0009410(response to xeno…	00270(Cysteine and methionine metabolism);00480(Glutathione metabolism);04216(Ferroptosis)	K21456	EC:6.3.2.3	glutathione synthetase [Source:HGNC Symbol;Acc:HGNC:4624]	0	0	0	0	0	2.1769	8.24789	7.64046	-inf	-inf	7.56287e-07	0.000245963	down	yes
73932996	73950414	ENST00000651776	9	3592	MSTRG.9906	FAM161B	GO:0005515(protein binding);GO:0005881(cytoplasmic microtubule);GO:0008150(biological_process);GO:0015630(microtubule cytoskeleton);GO:0044782(cilium organization)	NA	NA	NA	FAM161B, centrosomal protein [Source:HGNC Symbol;Acc:HGNC:19854]	1.45033	0	1.77279	1.76475	0	0	0	0	inf	inf	7.64936e-07	0.000247242	up	yes
31794496	31798771	ENST00000468720	3	2667	ENSG00000134668	SPOCD1	GO:0006351(transcription, DNA-templated);GO:0010923(negative regulation of phosphatase activity)	NA	K17596	NA	SPOC domain containing 1 [Source:HGNC Symbol;Acc:HGNC:26338]	0.241914	0.318932	0.429707	0.251609	0	0	0	0	inf	inf	7.68349e-07	0.000247242	up	yes
29457348	29634972	ENST00000375398	37	8201	MSTRG.3624	SVIL	GO:0002102(podosome);GO:0003779(actin binding);GO:0005515(protein binding);GO:0005634(nucleus);GO:0005737(cytoplasm);GO:0005829(cytosol);GO:0005856(cytoskeleton);GO:0005886(plasma membrane);GO:0005925(focal adhesion);GO:0007010(cytoskeleton organization);GO:0007519(skeletal muscle tissue development);GO:0015629(actin cytoskeleton);GO:0016020(membrane);GO:0030054(cell junction);GO:0030496(midbody)…	NA	K10369	NA	supervillin [Source:HGNC Symbol;Acc:HGNC:11480]	0	0	0	0	0	9.52465	0.276096	0.377213	-inf	-inf	7.78122e-07	0.000249069	down	yes
184174855	184184091	ENST00000292807	12	1931	MSTRG.23967	AP2M1	GO:0002092(positive regulation of receptor internalization);GO:0005048(signal sequence binding);GO:0005215(transporter activity);GO:0005515(protein binding);GO:0005765(lysosomal membrane);GO:0005829(cytosol);GO:0005886(plasma membrane);GO:0005905(clathrin-coated pit);GO:0006886(intracellular protein transport);GO:0006897(endocytosis);GO:0006900(vesicle budding from membrane);GO:0008289(lipid bind…	04144(Endocytosis);04721(Synaptic vesicle cycle);04961(Endocrine and other factor-regulated calcium reabsorption);05016(Huntington disease)	K11826	NA	adaptor related protein complex 2 subunit mu 1 [Source:HGNC Symbol;Acc:HGNC:564]	3.29249	0	2.78693	2.78543	0	0	0	0	inf	inf	7.99829e-07	0.000254677	up	yes
58638179	58647170	ENST00000335867	4	2571	ENSG00000165617	DACT1	GO:0000122(negative regulation of transcription by RNA polymerase II);GO:0001085(RNA polymerase II transcription factor binding);GO:0005080(protein kinase C binding);GO:0005515(protein binding);GO:0005634(nucleus);GO:0005654(nucleoplasm);GO:0005737(cytoplasm);GO:0005829(cytosol);GO:0007275(multicellular organism development);GO:0007399(nervous system development);GO:0008013(beta-catenin binding);…	NA	K22154	NA	dishevelled binding antagonist of beta catenin 1 [Source:HGNC Symbol;Acc:HGNC:17748]	0.407165	0.020589	0.991773	0.821704	0	0	0	0	inf	inf	8.5539e-07	0.000270949	up	yes
96774484	96807945	ENST00000443439	19	4841	MSTRG.26520	ERAP1	GO:0001525(angiogenesis);GO:0002250(adaptive immune response);GO:0002376(immune system process);GO:0002474(antigen processing and presentation of peptide antigen via MHC class I);GO:0004177(aminopeptidase activity);GO:0005138(interleukin-6 receptor binding);GO:0005151(interleukin-1, type II receptor binding);GO:0005515(protein binding);GO:0005576(extracellular region);GO:0005615(extracellular spa…	NA	K09604	EC:3.4.11.-	endoplasmic reticulum aminopeptidase 1 [Source:HGNC Symbol;Acc:HGNC:18173]	0	0	0	0	1.78806	0.935659	1.37102	0	-inf	-inf	8.73199e-07	0.000275157	down	yes
113286947	113304067	ENST00000489244	4	5267	MSTRG.23194	CFAP44	GO:0005515(protein binding);GO:0005737(cytoplasm);GO:0005856(cytoskeleton);GO:0005929(cilium);GO:0007288(sperm axoneme assembly);GO:0030317(flagellated sperm motility);GO:0031514(motile cilium);GO:0042995(cell projection);GO:0060285(cilium-dependent cell motility)	NA	NA	NA	cilia and flagella associated protein 44 [Source:HGNC Symbol;Acc:HGNC:25631]	0.802546	0	1.26438	0.909896	0	0	0	0	inf	inf	9.04225e-07	0.000283125	up	yes
39105411	39486987	MSTRG.823.6	94	17684	MSTRG.823	MACF1	NA	NA	NA	NA	NA	1.61054	10.8738	0	0.003557	0	0	0	0	inf	inf	9.07795e-07	0.000283125	up	yes
77005260	77027153	MSTRG.8889.4	5	3315	MSTRG.8889	FBXL3	NA	NA	NA	NA	NA	0	0	0	0	2.62369	0	1.27528	2.23833	-inf	-inf	9.15135e-07	0.000283958	down	yes
73653498	73746818	ENST00000522962	7	1041	MSTRG.31467	STAU2	GO:0003723(RNA binding);GO:0003725(double-stranded RNA binding);GO:0005515(protein binding);GO:0005634(nucleus);GO:0005730(nucleolus);GO:0005737(cytoplasm);GO:0005783(endoplasmic reticulum);GO:0005874(microtubule);GO:0016020(membrane)	NA	K17597	NA	staufen double-stranded RNA binding protein 2 [Source:HGNC Symbol;Acc:HGNC:11371]	0	0	0	0	0.924588	0.760529	0.745838	0.721381	-inf	-inf	9.46317e-07	0.000292143	down	yes
151364345	151372694	MSTRG.2097.12	12	1834	MSTRG.2097	SELENBP1	NA	NA	NA	NA	NA	0	0	0	0	0	3.07867	3.41187	2.9714	-inf	-inf	9.61387e-07	0.000295296	down	yes
1635236	1658887	MSTRG.126.3	19	4398	MSTRG.126	CDK11B	NA	NA	NA	NA	NA	0	0	0	0	1.12704	0	1.26189	1.63304	-inf	-inf	9.71618e-07	0.000296939	down	yes
14518560	14774897	ENST00000181796	5	3785	MSTRG.3448	FAM107B	NA	NA	NA	NA	family with sequence similarity 107 member B [Source:HGNC Symbol;Acc:HGNC:23726]	1.14996	0	1.18074	1.41008	0	0	0	0	inf	inf	9.79714e-07	0.000297916	up	yes
13620868	13652754	ENST00000361303	3	8086	ENSG00000168675	LDLRAD4	GO:0005515(protein binding);GO:0005654(nucleoplasm);GO:0005768(endosome);GO:0009968(negative regulation of signal transduction);GO:0010719(negative regulation of epithelial to mesenchymal transition);GO:0010991(negative regulation of SMAD protein complex assembly);GO:0016020(membrane);GO:0016021(integral component of membrane);GO:0030336(negative regulation of cell migration);GO:0030512(negative …	NA	NA	NA	low density lipoprotein receptor class A domain containing 4 [Source:HGNC Symbol;Acc:HGNC:1224]	0.048003	0.169985	0.096186	0.108086	0	0	0	0	inf	inf	9.99604e-07	0.000302452	up	yes
73949926	73963108	ENST00000394026	12	1608	MSTRG.9909	COQ6	GO:0004497(monooxygenase activity);GO:0005515(protein binding);GO:0005739(mitochondrion);GO:0005743(mitochondrial inner membrane);GO:0005794(Golgi apparatus);GO:0006744(ubiquinone biosynthetic process);GO:0016020(membrane);GO:0016491(oxidoreductase activity);GO:0016709(oxidoreductase activity, acting on paired donors, with incorporation or reduction of molecular oxygen, NAD(P)H as one donor, and …	00130(Ubiquinone and other terpenoid-quinone biosynthesis)	K06126	EC:1.14.13.-	coenzyme Q6, monooxygenase [Source:HGNC Symbol;Acc:HGNC:20233]	1.82931	0	3.84878	3.28944	0	0	0	0	inf	inf	1.07619e-06	0.000322796	up	yes
17353875	17354424	ENST00000430907	1	550	MSTRG.25779	FTH1P10	NA	NA	NA	NA	ferritin heavy chain 1 pseudogene 10 [Source:HGNC Symbol;Acc:HGNC:3980]	37.621	0.111662	34.358	45.1936	0.251743	0.078652	0.268414	0.064848	176.724	7.46535	1.07745e-06	0.000322796	up	yes
7128423	7158945	MSTRG.6649.1	19	3876	MSTRG.6649	CLSTN3	NA	NA	NA	NA	NA	0	0	0	0	1.88794	0	1.28475	1.08462	-inf	-inf	1.1119e-06	0.000331141	down	yes
108331199	108462641	ENST00000527531	12	2683	MSTRG.6192	C11orf65	GO:0005515(protein binding)	NA	NA	NA	chromosome 11 open reading frame 65 [Source:HGNC Symbol;Acc:HGNC:28519]	0	0	0	0	0.213596	0.223959	0.419691	0.388207	-inf	-inf	1.12304e-06	0.000331141	down	yes
54449224	54462015	MSTRG.17664.6	16	5704	MSTRG.17664	LENG8	NA	NA	NA	NA	NA	0	0.01138	0	0.01337	1.82535	0.513167	0.769604	0.742148	0.00642812	-7.28139	1.12321e-06	0.000331141	down	yes
11012670	11022310	ENST00000621715	5	816	MSTRG.265	TARDBP	GO:0001228(DNA-binding transcription activator activity, RNA polymerase II-specific);GO:0001933(negative regulation of protein phosphorylation);GO:0003676(nucleic acid binding);GO:0003677(DNA binding);GO:0003690(double-stranded DNA binding);GO:0003700(DNA-binding transcription factor activity);GO:0003723(RNA binding);GO:0003727(single-stranded RNA binding);GO:0003730(mRNA 3'-UTR binding);GO:00055…	NA	NA	NA	TAR DNA binding protein [Source:HGNC Symbol;Acc:HGNC:11571]	0	0	0	0	2.82598	0	10.7193	14.5486	-inf	-inf	1.12709e-06	0.000331141	down	yes
28324306	28348824	MSTRG.22494.5	7	1044	MSTRG.22494	AZI2	NA	NA	NA	NA	NA	0	3.66004	6.34079	3.19344	0	0	0	0	inf	inf	1.16503e-06	0.000340644	up	yes
16588306	16712669	MSTRG.33690.4	18	3322	MSTRG.33690	CTPS2	NA	NA	NA	NA	NA	0	0	0	0	1.87541	1.30825	0	1.28482	-inf	-inf	1.17473e-06	0.000341835	down	yes
11272416	11555083	ENST00000354956	18	2296	MSTRG.22338	ATG7	GO:0000045(autophagosome assembly);GO:0000407(phagophore assembly site);GO:0000422(autophagy of mitochondrion);GO:0004839(ubiquitin activating enzyme activity);GO:0005515(protein binding);GO:0005576(extracellular region);GO:0005737(cytoplasm);GO:0005829(cytosol);GO:0005930(axoneme);GO:0006464(cellular protein modification process);GO:0006497(protein lipidation);GO:0006501(C-terminal protein lipid…	04136(Autophagy - other);04140(Autophagy - animal);04216(Ferroptosis)	K08337	NA	autophagy related 7 [Source:HGNC Symbol;Acc:HGNC:16935]	1.96332	0	1.10851	3.79827	0	0	0	0	inf	inf	1.18468e-06	0.000342406	up	yes
108742064	108763053	MSTRG.25055.3	12	2000	MSTRG.25055	ETNPPL	NA	NA	NA	NA	NA	0	0	0	0	2.30514	3.49826	0	1.89237	-inf	-inf	1.18928e-06	0.000342406	down	yes
39142338	39154562	ENST00000514182	5	2593	MSTRG.22588	CSRNP1	GO:0000981(DNA-binding transcription factor activity, RNA polymerase II-specific);GO:0001228(DNA-binding transcription activator activity, RNA polymerase II-specific);GO:0003674(molecular_function);GO:0003677(DNA binding);GO:0003700(DNA-binding transcription factor activity);GO:0005515(protein binding);GO:0005634(nucleus);GO:0006355(regulation of transcription, DNA-templated);GO:0006915(apoptotic…	NA	K17494	NA	cysteine and serine rich nuclear protein 1 [Source:HGNC Symbol;Acc:HGNC:14300]	1.47054	2.87629	0	1.51731	0	0	0	0	inf	inf	1.19358e-06	0.000342406	up	yes
48802159	48824956	ENST00000643374	29	4099	MSTRG.33930	HDAC6	GO:0000118(histone deacetylase complex);GO:0000209(protein polyubiquitination);GO:0000978(RNA polymerase II proximal promoter sequence-specific DNA binding);GO:0003779(actin binding);GO:0004407(histone deacetylase activity);GO:0005515(protein binding);GO:0005634(nucleus);GO:0005654(nucleoplasm);GO:0005737(cytoplasm);GO:0005771(multivesicular body);GO:0005829(cytosol);GO:0005874(microtubule);GO:00…	05034(Alcoholism);05203(Viral carcinogenesis)	NA	NA	histone deacetylase 6 [Source:HGNC Symbol;Acc:HGNC:14064]	0.914168	0	0.746413	1.14227	0	0	0	0	inf	inf	1.20225e-06	0.00034244	up	yes
106063698	106140033	MSTRG.7987.2	8	6363	MSTRG.7987	NUAK1	NA	NA	NA	NA	NA	0.655847	0	1.0526	0.431305	0	0	0	0	inf	inf	1.20496e-06	0.00034244	up	yes
76712832	76726679	ENST00000445478	7	5303	MSTRG.15228	JMJD6	GO:0001568(blood vessel development);GO:0001822(kidney development);GO:0002040(sprouting angiogenesis);GO:0003713(transcription coactivator activity);GO:0003723(RNA binding);GO:0003727(single-stranded RNA binding);GO:0005506(iron ion binding);GO:0005515(protein binding);GO:0005634(nucleus);GO:0005654(nucleoplasm);GO:0005730(nucleolus);GO:0005737(cytoplasm);GO:0005829(cytosol);GO:0005886(plasma me…	NA	K11323	EC:1.14.11.-	jumonji domain containing 6, arginine demethylase and lysine hydroxylase [Source:HGNC Symbol;Acc:HGNC:19355]	0	1.09365	1.08871	0.494794	0	0	0	0	inf	inf	1.21541e-06	0.000343804	up	yes
23787182	23834270	ENST00000646723	8	3594	MSTRG.21661	SMARCB1	GO:0000228(nuclear chromosome);GO:0000790(nuclear chromatin);GO:0000978(RNA polymerase II proximal promoter sequence-specific DNA binding);GO:0000980(RNA polymerase II distal enhancer sequence-specific DNA binding);GO:0001164(RNA polymerase I CORE element sequence-specific DNA binding);GO:0001188(RNA polymerase I preinitiation complex assembly);GO:0001650(fibrillar center);GO:0001741(XY body);GO:…	04714(Thermogenesis);05225(Hepatocellular carcinoma)	NA	NA	SWI/SNF related, matrix associated, actin dependent regulator of chromatin, subfamily b, member 1 [Source:HGNC Symbol;Acc:HGNC:11103]	0	1.03018	1.42601	0.892936	0	0	0	0	inf	inf	1.2372e-06	0.000348345	up	yes
136849426	136851022	MSTRG.33496.41	3	690	MSTRG.33496	PHPT1	NA	NA	NA	NA	NA	3.75807	0	3.533	5.34623	0	0	0	0	inf	inf	1.2772e-06	0.000356525	up	yes
1558366	1560460	MSTRG.3370.1	2	1741	MSTRG.3370	ADARB2	NA	NA	NA	NA	NA	0	0	0	0	1.84398	0	3.39556	2.86296	-inf	-inf	1.28046e-06	0.000356525	down	yes
135052265	135176622	MSTRG.19169.1	26	3593	MSTRG.19169	RAB3GAP1	NA	NA	NA	NA	NA	0	0.655534	1.24167	4.00108	0	0	0	0	inf	inf	1.28692e-06	0.000356525	up	yes
113299332	113335103	MSTRG.8141.10	16	2942	MSTRG.8141	SLC8B1	NA	NA	NA	NA	NA	0	0	0	0	1.37578	1.27411	1.73566	0	-inf	-inf	1.2897e-06	0.000356525	down	yes
3227636	3239217	ENST00000539553	20	2859	ENSG00000088836	SLC4A11	GO:0005272(sodium channel activity);GO:0005452(inorganic anion exchanger activity);GO:0005886(plasma membrane);GO:0005887(integral component of plasma membrane);GO:0006811(ion transport);GO:0006814(sodium ion transport);GO:0006820(anion transport);GO:0015106(bicarbonate transmembrane transporter activity);GO:0015252(proton channel activity);GO:0015293(symporter activity);GO:0015301(anion:anion an…	NA	K13862	NA	solute carrier family 4 member 11 [Source:HGNC Symbol;Acc:HGNC:16438]	0.008287	0	0	0	1.31705	0.402399	0.419838	0.105636	0.00369145	-8.0816	1.29869e-06	0.000357387	down	yes
62302997	62308862	ENST00000253003	10	1379	MSTRG.20903	ADRM1	GO:0000502(proteasome complex);GO:0002020(protease binding);GO:0005515(protein binding);GO:0005634(nucleus);GO:0005654(nucleoplasm);GO:0005737(cytoplasm);GO:0005829(cytosol);GO:0005886(plasma membrane);GO:0006368(transcription elongation from RNA polymerase II promoter);GO:0006511(ubiquitin-dependent protein catabolic process);GO:0008541(proteasome regulatory particle, lid subcomplex);GO:0010950(…	03050(Proteasome);05169(Epstein-Barr virus infection)	K06691	NA	adhesion regulating molecule 1 [Source:HGNC Symbol;Acc:HGNC:15759]	42.1596	66.8729	44.5583	0.148511	0.085397	0.286808	0.537915	0.53231	106.584	6.73584	1.3064e-06	0.00035789	up	yes
47002033	47009548	ENST00000443829	23	3508	MSTRG.22698	NBEAL2	GO:0005515(protein binding);GO:0005783(endoplasmic reticulum);GO:0005886(plasma membrane);GO:0030220(platelet formation);GO:0043312(neutrophil degranulation);GO:0070821(tertiary granule membrane);GO:0101003(ficolin-1-rich granule membrane)	NA	K23286	NA	neurobeachin like 2 [Source:HGNC Symbol;Acc:HGNC:31928]	0	0	0	0	3.38549	0	0.623036	2.04694	-inf	-inf	1.33873e-06	0.000362548	down	yes
53050186	53064372	ENST00000549700	30	4525	MSTRG.7321	TNS2	GO:0001822(kidney development);GO:0004721(phosphoprotein phosphatase activity);GO:0005515(protein binding);GO:0005886(plasma membrane);GO:0005925(focal adhesion);GO:0006470(protein dephosphorylation);GO:0008285(negative regulation of cell population proliferation);GO:0014850(response to muscle activity);GO:0016020(membrane);GO:0016787(hydrolase activity);GO:0019725(cellular homeostasis);GO:001990…	NA	K18080	NA	tensin 2 [Source:HGNC Symbol;Acc:HGNC:19737]	0	0	0	0	0.877554	0	1.05745	0.81329	-inf	-inf	1.34004e-06	0.000362548	down	yes
150623622	150629577	ENST00000356527	3	2546	MSTRG.2009	ENSA	GO:0000086(G2/M transition of mitotic cell cycle);GO:0000278(mitotic cell cycle);GO:0004864(protein phosphatase inhibitor activity);GO:0005102(signaling receptor binding);GO:0005515(protein binding);GO:0005654(nucleoplasm);GO:0005737(cytoplasm);GO:0007049(cell cycle);GO:0007584(response to nutrient);GO:0008200(ion channel inhibitor activity);GO:0009749(response to glucose);GO:0019212(phosphatase …	NA	NA	NA	endosulfine alpha [Source:HGNC Symbol;Acc:HGNC:3360]	1.68196	0	0.990733	1.46825	0	0	0	0	inf	inf	1.34129e-06	0.000362548	up	yes
69239620	69255160	ENST00000550987	4	560	MSTRG.7647	CPSF6	GO:0003676(nucleic acid binding);GO:0003723(RNA binding);GO:0003729(mRNA binding);GO:0005515(protein binding);GO:0005634(nucleus);GO:0005654(nucleoplasm);GO:0005726(perichromatin fibrils);GO:0005737(cytoplasm);GO:0005847(mRNA cleavage and polyadenylation specificity factor complex);GO:0005849(mRNA cleavage factor complex);GO:0006397(mRNA processing);GO:0016020(membrane);GO:0016607(nuclear speck);…	03015(mRNA surveillance pathway)	K14398	NA	cleavage and polyadenylation specific factor 6 [Source:HGNC Symbol;Acc:HGNC:13871]	5.97712	6.86393	0	6.43354	0	0	0	0	inf	inf	1.42722e-06	0.000379503	up	yes
9528007	9538590	ENST00000593003	6	2402	MSTRG.16453	ZNF426	GO:0000981(DNA-binding transcription factor activity, RNA polymerase II-specific);GO:0003676(nucleic acid binding);GO:0003677(DNA binding);GO:0005515(protein binding);GO:0005622(intracellular);GO:0005634(nucleus);GO:0006355(regulation of transcription, DNA-templated);GO:0006357(regulation of transcription by RNA polymerase II);GO:0046872(metal ion binding)	05168(Herpes simplex virus 1 infection)	K09228	NA	zinc finger protein 426 [Source:HGNC Symbol;Acc:HGNC:20725]	1.79962	2.71395	0	1.0655	0	0	0	0	inf	inf	1.42822e-06	0.000379503	up	yes
148432959	148459757	MSTRG.2033.10	4	1646	MSTRG.2033	LINC01138	NA	NA	NA	NA	NA	0	1.24751	2.32473	2.27556	0	0	0	0	inf	inf	1.43577e-06	0.000379503	up	yes
23953789	23969279	ENST00000558581	7	1143	MSTRG.9265	DHRS4	GO:0000253(3-keto sterol reductase activity);GO:0004090(carbonyl reductase (NADPH) activity);GO:0005102(signaling receptor binding);GO:0005634(nucleus);GO:0005739(mitochondrion);GO:0005777(peroxisome);GO:0005778(peroxisomal membrane);GO:0005782(peroxisomal matrix);GO:0005789(endoplasmic reticulum membrane);GO:0005829(cytosol);GO:0006066(alcohol metabolic process);GO:0006625(protein targeting to p…	00830(Retinol metabolism);04146(Peroxisome)	K11147	EC:1.1.-.-	dehydrogenase/reductase 4 [Source:HGNC Symbol;Acc:HGNC:16985]	0	0	0	0	2.93362	3.50744	0	3.28373	-inf	-inf	1.44098e-06	0.000379503	down	yes
43576297	43615660	ENST00000372226	11	3322	MSTRG.28211	POLH	GO:0000731(DNA synthesis involved in DNA repair);GO:0003677(DNA binding);GO:0003684(damaged DNA binding);GO:0003887(DNA-directed DNA polymerase activity);GO:0005515(protein binding);GO:0005634(nucleus);GO:0005654(nucleoplasm);GO:0005657(replication fork);GO:0005829(cytosol);GO:0006260(DNA replication);GO:0006281(DNA repair);GO:0006282(regulation of DNA repair);GO:0006290(pyrimidine dimer repair);…	01524(Platinum drug resistance);03460(Fanconi anemia pathway)	K03509	EC:2.7.7.7	DNA polymerase eta [Source:HGNC Symbol;Acc:HGNC:9181]	0	0	0	0	0	1.26256	0.900421	1.50444	-inf	-inf	1.44111e-06	0.000379503	down	yes
67281509	67284369	ENST00000532099	9	886	MSTRG.5650	GRK2	GO:0000166(nucleotide binding);GO:0002026(regulation of the force of heart contraction);GO:0002029(desensitization of G protein-coupled receptor signaling pathway);GO:0003108(negative regulation of the force of heart contraction by chemical signal);GO:0004672(protein kinase activity);GO:0004674(protein serine/threonine kinase activity);GO:0004703(G protein-coupled receptor kinase activity);GO:000…	04062(Chemokine signaling pathway);04144(Endocytosis);04340(Hedgehog signaling pathway);04724(Glutamatergic synapse);04740(Olfactory transduction);05032(Morphine addiction)	NA	NA	G protein-coupled receptor kinase 2 [Source:HGNC Symbol;Acc:HGNC:289]	0	0	0	0	4.63278	6.44519	0	3.32521	-inf	-inf	1.44146e-06	0.000379503	down	yes
3721737	3750809	ENST00000589378	21	3068	MSTRG.16288	TJP3	GO:0005515(protein binding);GO:0005634(nucleus);GO:0005886(plasma membrane);GO:0005923(bicellular tight junction);GO:0016020(membrane);GO:0030054(cell junction)	04530(Tight junction)	K06097	NA	tight junction protein 3 [Source:HGNC Symbol;Acc:HGNC:11829]	0	0	0	0	0	1.16197	1.30226	0.940443	-inf	-inf	1.45912e-06	0.000382498	down	yes
6221197	6235944	MSTRG.174.4	6	3479	MSTRG.174	ICMT	NA	NA	NA	NA	NA	0	0	0	0	0.916629	0.879032	6.13797	0	-inf	-inf	1.47397e-06	0.000384732	down	yes
58666372	58684707	ENST00000564100	8	2867	MSTRG.12729	SLC38A7	GO:0003333(amino acid transmembrane transport);GO:0005290(L-histidine transmembrane transporter activity);GO:0005313(L-glutamate transmembrane transporter activity);GO:0005515(protein binding);GO:0006811(ion transport);GO:0006814(sodium ion transport);GO:0006855(drug transmembrane transport);GO:0006865(amino acid transport);GO:0006867(asparagine transport);GO:0006868(glutamine transport);GO:00151…	NA	K14994	NA	solute carrier family 38 member 7 [Source:HGNC Symbol;Acc:HGNC:25582]	0	0	0	0	0.81306	1.10304	0	1.12106	-inf	-inf	1.4849e-06	0.000385928	down	yes
32996729	33097146	ENST00000307377	13	2018	MSTRG.22531	GLB1	GO:0004553(hydrolase activity, hydrolyzing O-glycosyl compounds);GO:0004565(beta-galactosidase activity);GO:0005515(protein binding);GO:0005576(extracellular region);GO:0005615(extracellular space);GO:0005737(cytoplasm);GO:0005764(lysosome);GO:0005773(vacuole);GO:0005794(Golgi apparatus);GO:0005975(carbohydrate metabolic process);GO:0006027(glycosaminoglycan catabolic process);GO:0006687(glycosph…	00052(Galactose metabolism);00511(Other glycan degradation);00531(Glycosaminoglycan degradation);00600(Sphingolipid metabolism);00604(Glycosphingolipid biosynthesis - ganglio series);04142(Lysosome)	NA	NA	galactosidase beta 1 [Source:HGNC Symbol;Acc:HGNC:4298]	0.069089	0	0	0	12.2113	0.716577	8.26373	10.4768	0.00218164	-8.84037	1.49574e-06	0.000387091	down	yes
36389862	36453791	ENST00000265748	24	4731	MSTRG.29636	ANLN	GO:0000281(mitotic cytokinesis);GO:0000915(actomyosin contractile ring assembly);GO:0000921(septin ring assembly);GO:0002244(hematopoietic progenitor cell differentiation);GO:0003779(actin binding);GO:0005634(nucleus);GO:0005654(nucleoplasm);GO:0005737(cytoplasm);GO:0005826(actomyosin contractile ring);GO:0005856(cytoskeleton);GO:0005938(cell cortex);GO:0007049(cell cycle);GO:0007096(regulation o…	NA	K18621	NA	anillin actin binding protein [Source:HGNC Symbol;Acc:HGNC:14082]	0.124385	0.642824	0.825208	0.319093	0	0	0	0.012995	147.096	7.20061	1.50877e-06	0.000388809	up	yes
52787916	52804044	MSTRG.26032.3	3	4367	MSTRG.26032	ITGA1	NA	NA	NA	NA	NA	0	0.524434	0.712348	1.37861	0	0	0	0	inf	inf	1.55443e-06	0.000398472	up	yes
94545922	94602098	ENST00000394045	20	2699	MSTRG.4273	HELLS	GO:0000166(nucleotide binding);GO:0000775(chromosome, centromeric region);GO:0001655(urogenital system development);GO:0003682(chromatin binding);GO:0004386(helicase activity);GO:0005515(protein binding);GO:0005524(ATP binding);GO:0005634(nucleus);GO:0005721(pericentric heterochromatin);GO:0006306(DNA methylation);GO:0006342(chromatin silencing);GO:0006346(methylation-dependent chromatin silencin…	NA	K19001	NA	helicase, lymphoid specific [Source:HGNC Symbol;Acc:HGNC:4861]	2.35924	0.735962	0	2.06367	0	0	0	0	inf	inf	1.56257e-06	0.000398472	up	yes
18140677	18543557	ENST00000324631	14	5876	MSTRG.3520	CACNB2	GO:0005244(voltage-gated ion channel activity);GO:0005245(voltage-gated calcium channel activity);GO:0005262(calcium channel activity);GO:0005515(protein binding);GO:0005886(plasma membrane);GO:0005887(integral component of plasma membrane);GO:0005891(voltage-gated calcium channel complex);GO:0006811(ion transport);GO:0006816(calcium ion transport);GO:0007268(chemical synaptic transmission);GO:00…	04010(MAPK signaling pathway);04260(Cardiac muscle contraction);04261(Adrenergic signaling in cardiomyocytes);04921(Oxytocin signaling pathway);05410(Hypertrophic cardiomyopathy (HCM));05412(Arrhythmogenic right ventricular cardiomyopathy (ARVC));05414(Dilated cardiomyopathy (DCM))	NA	NA	calcium voltage-gated channel auxiliary subunit beta 2 [Source:HGNC Symbol;Acc:HGNC:1402]	0.274333	0	0.396529	0.629982	0	0	0	0	inf	inf	1.56592e-06	0.000398472	up	yes
74980954	74984870	MSTRG.15118.2	2	2427	MSTRG.15118	.	NA	NA	NA	NA	NA	0.966504	1.44415	0.849749	0	0	0	0	0	inf	inf	1.5934e-06	0.0004035	up	yes
85018083	85048446	MSTRG.1412.2	14	3055	MSTRG.1412	MCOLN3	NA	NA	NA	NA	NA	0.568013	0	2.17743	1.34686	0	0	0	0	inf	inf	1.59895e-06	0.0004035	up	yes
88706483	88715320	ENST00000564105	14	1586	MSTRG.13248	CTU2	GO:0000049(tRNA binding);GO:0002098(tRNA wobble uridine modification);GO:0002143(tRNA wobble position uridine thiolation);GO:0005515(protein binding);GO:0005737(cytoplasm);GO:0005829(cytosol);GO:0006400(tRNA modification);GO:0008033(tRNA processing);GO:0016779(nucleotidyltransferase activity);GO:0016783(sulfurtransferase activity);GO:0032447(protein urmylation);GO:0032991(protein-containing compl…	04122(Sulfur relay system)	K14169	NA	cytosolic thiouridylase subunit 2 [Source:HGNC Symbol;Acc:HGNC:28005]	0	0	0	0	3.71474	1.36605	0	2.73177	-inf	-inf	1.61287e-06	0.000403803	down	yes
121281183	121332589	MSTRG.33142.11	18	2325	MSTRG.33142	GSN	NA	NA	NA	NA	NA	0	0	0	0	2.00384	0	3.36809	0.919186	-inf	-inf	1.61343e-06	0.000403803	down	yes
144159273	144170630	ENST00000513112	5	2135	MSTRG.26971	YIPF5	GO:0005515(protein binding);GO:0005654(nucleoplasm);GO:0005783(endoplasmic reticulum);GO:0005789(endoplasmic reticulum membrane);GO:0005794(Golgi apparatus);GO:0015031(protein transport);GO:0016020(membrane);GO:0016021(integral component of membrane);GO:0016192(vesicle-mediated transport);GO:0030134(COPII-coated ER to Golgi transport vesicle);GO:0031410(cytoplasmic vesicle);GO:0042175(nuclear out…	NA	K20363	NA	Yip1 domain family member 5 [Source:HGNC Symbol;Acc:HGNC:24877]	0	0	0	0	0	0.841618	1.65763	1.76395	-inf	-inf	1.62352e-06	0.000404662	down	yes
39342474	39370115	MSTRG.17177.5	5	1128	MSTRG.17177	SAMD4B	NA	NA	NA	NA	NA	0	1.75949	1.68724	3.78285	0	0	0	0	inf	inf	1.64518e-06	0.000406947	up	yes
19303724	19320497	ENST00000606725	5	728	MSTRG.16831	AC004475	GO:0000398(mRNA splicing, via spliceosome);GO:0003676(nucleic acid binding);GO:0003723(RNA binding);GO:0005515(protein binding);GO:0005634(nucleus);GO:0005654(nucleoplasm);GO:0005681(spliceosomal complex);GO:0006396(RNA processing);GO:0006397(mRNA processing);GO:0008380(RNA splicing)	NA	K13096	NA	SURP and G-patch domain containing 1 [Source:NCBI gene;Acc:57794]	1.51601	1.53729	0.252076	1.49407	0	0	0	0	inf	inf	1.64607e-06	0.000406947	up	yes
27666064	27672178	ENST00000339145	5	822	MSTRG.570	IFI6	GO:0001836(release of cytochrome c from mitochondria);GO:0002376(immune system process);GO:0005515(protein binding);GO:0005739(mitochondrion);GO:0005743(mitochondrial inner membrane);GO:0005886(plasma membrane);GO:0006915(apoptotic process);GO:0006955(immune response);GO:0016020(membrane);GO:0016021(integral component of membrane);GO:0031966(mitochondrial membrane);GO:0042058(regulation of epider…	NA	NA	NA	interferon alpha inducible protein 6 [Source:HGNC Symbol;Acc:HGNC:4054]	0.031103	0.004992	0	0.046913	6.40598	0.088733	8.46348	8.17587	0.00358813	-8.12255	1.65447e-06	0.000407368	down	yes
131107556	131147797	ENST00000409612	8	2210	MSTRG.19125	PLEKHB2	GO:0005515(protein binding);GO:0005547(phosphatidylinositol-3,4,5-trisphosphate binding);GO:0005768(endosome);GO:0016020(membrane);GO:0016021(integral component of membrane);GO:0045595(regulation of cell differentiation);GO:0055038(recycling endosome membrane)	NA	NA	NA	pleckstrin homology domain containing B2 [Source:HGNC Symbol;Acc:HGNC:19236]	0	0	0	0.001498	0.027978	2.18722	1.36979	0.095831	0.000406974	-11.2628	1.66703e-06	0.000408806	down	yes
169986602	170026395	ENST00000361618	3	6301	MSTRG.25557	MFAP3L	GO:0005515(protein binding);GO:0005634(nucleus);GO:0005737(cytoplasm);GO:0005886(plasma membrane);GO:0016020(membrane);GO:0016021(integral component of membrane)	NA	NA	NA	microfibril associated protein 3 like [Source:HGNC Symbol;Acc:HGNC:29083]	1.43248	2.0089	1.95354	1.60677	0.011479	0.096517	0.018567	0.024231	46.4321	5.53705	1.71177e-06	0.000418092	up	yes
100880655	100884847	ENST00000534062	1	4193	ENSG00000254656	RTL1	GO:0007275(multicellular organism development);GO:0016020(membrane);GO:0016021(integral component of membrane)	NA	NA	NA	retrotransposon Gag like 1 [Source:HGNC Symbol;Acc:HGNC:14665]	0.239385	0.102388	0.196403	0.158423	0	0	0	0	inf	inf	1.74241e-06	0.000423874	up	yes
17638584	17730855	ENST00000618481	6	4961	MSTRG.21505	BCL2L13	GO:0005515(protein binding);GO:0005634(nucleus);GO:0005739(mitochondrion);GO:0006915(apoptotic process);GO:0006919(activation of cysteine-type endopeptidase activity involved in apoptotic process);GO:0008656(cysteine-type endopeptidase activator activity involved in apoptotic process);GO:0016020(membrane);GO:0016021(integral component of membrane);GO:0031966(mitochondrial membrane);GO:0042981(reg…	04137(Mitophagy - animal);05134(Legionellosis)	K15485	NA	BCL2 like 13 [Source:HGNC Symbol;Acc:HGNC:17164]	0.561032	0.32613	0	0.66912	0	0	0	0	inf	inf	1.76716e-06	0.000426548	up	yes
218637916	218659524	ENST00000449707	10	5909	MSTRG.19922	ZNF142	GO:0000981(DNA-binding transcription factor activity, RNA polymerase II-specific);GO:0003674(molecular_function);GO:0003676(nucleic acid binding);GO:0003677(DNA binding);GO:0005575(cellular_component);GO:0005634(nucleus);GO:0006357(regulation of transcription by RNA polymerase II);GO:0008150(biological_process);GO:0046872(metal ion binding)	NA	NA	NA	zinc finger protein 142 [Source:HGNC Symbol;Acc:HGNC:12927]	0	0	0	0	0	0.437438	0.495048	0.379642	-inf	-inf	1.76744e-06	0.000426548	down	yes
100717817	100722036	ENST00000518196	4	631	MSTRG.31731	PABPC1	GO:0000184(nuclear-transcribed mRNA catabolic process, nonsense-mediated decay);GO:0000398(mRNA splicing, via spliceosome);GO:0003676(nucleic acid binding);GO:0003723(RNA binding);GO:0003730(mRNA 3'-UTR binding);GO:0005515(protein binding);GO:0005634(nucleus);GO:0005681(spliceosomal complex);GO:0005737(cytoplasm);GO:0005829(cytosol);GO:0005925(focal adhesion);GO:0006378(mRNA polyadenylation);GO:0…	03013(RNA transport);03015(mRNA surveillance pathway);03018(RNA degradation)	K13126	NA	poly(A) binding protein cytoplasmic 1 [Source:HGNC Symbol;Acc:HGNC:8554]	7.63129	0	2.10845	11.747	0	0	0	0	inf	inf	1.80853e-06	0.000433641	up	yes
141231825	141294924	ENST00000286353	6	3302	MSTRG.23551	PXYLP1	GO:0000139(Golgi membrane);GO:0005515(protein binding);GO:0005794(Golgi apparatus);GO:0006024(glycosaminoglycan biosynthetic process);GO:0010909(positive regulation of heparan sulfate proteoglycan biosynthetic process);GO:0016020(membrane);GO:0016021(integral component of membrane);GO:0016311(dephosphorylation);GO:0016787(hydrolase activity);GO:0016791(phosphatase activity);GO:0050650(chondroitin…	NA	K21403	EC:3.1.3.-	2-phosphoxylose phosphatase 1 [Source:HGNC Symbol;Acc:HGNC:26303]	0	0	0	0	0.74793	0	0.994936	0.618918	-inf	-inf	1.81108e-06	0.000433641	down	yes
137062127	137070557	ENST00000409687	6	3814	MSTRG.33506	SAPCD2	GO:0000132(establishment of mitotic spindle orientation);GO:0005515(protein binding);GO:0005634(nucleus);GO:0005730(nucleolus);GO:0005737(cytoplasm);GO:0005829(cytosol);GO:0005886(plasma membrane);GO:0005923(bicellular tight junction);GO:0005938(cell cortex);GO:0007049(cell cycle);GO:0008284(positive regulation of cell population proliferation);GO:0016020(membrane);GO:0016324(apical plasma membra…	NA	NA	NA	suppressor APC domain containing 2 [Source:HGNC Symbol;Acc:HGNC:28055]	14.4932	2.20015	11.1317	10.4817	0.36474	0.121086	0.214604	0.004444	54.3456	5.76409	1.82299e-06	0.000434779	up	yes
57619694	57665022	MSTRG.12709.3	15	3863	MSTRG.12709	ADGRG1	NA	NA	NA	NA	NA	0	0.694306	0.451715	1.72236	0	0	0	0	inf	inf	1.90613e-06	0.000451483	up	yes
121019111	121039242	ENST00000257570	6	3266	MSTRG.8238	OASL	GO:0002376(immune system process);GO:0003677(DNA binding);GO:0003723(RNA binding);GO:0003725(double-stranded RNA binding);GO:0005515(protein binding);GO:0005524(ATP binding);GO:0005634(nucleus);GO:0005654(nucleoplasm);GO:0005730(nucleolus);GO:0005737(cytoplasm);GO:0005829(cytosol);GO:0006955(immune response);GO:0009615(response to virus);GO:0016020(membrane);GO:0016740(transferase activity);GO:00…	05165(Human papillomavirus infection)	K14608	NA	2'-5'-oligoadenylate synthetase like [Source:HGNC Symbol;Acc:HGNC:8090]	2.82059	3.27582	2.36764	3.565	40.5302	50.0444	44.0092	44.3803	0.0672149	-3.89507	1.91233e-06	0.000451483	down	yes
576521	611964	ENST00000533464	18	5218	MSTRG.4720	PHRF1	GO:0006366(transcription by RNA polymerase II);GO:0006397(mRNA processing);GO:0016020(membrane);GO:0019904(protein domain specific binding);GO:0046872(metal ion binding);GO:0070063(RNA polymerase binding)	NA	K17586	NA	PHD and ring finger domains 1 [Source:HGNC Symbol;Acc:HGNC:24351]	0	0	0	0	0.572279	0.400845	0	1.53356	-inf	-inf	1.9153e-06	0.000451483	down	yes
2948196	2971661	ENST00000380520	7	1313	MSTRG.27399	SERPINB6	GO:0002020(protease binding);GO:0004867(serine-type endopeptidase inhibitor activity);GO:0005576(extracellular region);GO:0005615(extracellular space);GO:0005737(cytoplasm);GO:0005829(cytosol);GO:0005886(plasma membrane);GO:0007605(sensory perception of sound);GO:0010466(negative regulation of peptidase activity);GO:0010951(negative regulation of endopeptidase activity);GO:0016020(membrane);GO:00…	05146(Amoebiasis)	K13963	NA	serpin family B member 6 [Source:HGNC Symbol;Acc:HGNC:8950]	0	0	0	0	3.1865	2.3301	0	1.05461	-inf	-inf	2.03219e-06	0.000477188	down	yes
3000002	3019755	MSTRG.27400.14	8	1122	MSTRG.27400	NQO2	NA	NA	NA	NA	NA	1.06109	2.66506	3.93823	0	0	0	0	0	inf	inf	2.07036e-06	0.000483433	up	yes
8205942	8442701	MSTRG.21101.1	6	4082	MSTRG.21101	FP671120	NA	NA	NA	NA	NA	654.019	0	66.9747	0	0	0	0	0	inf	inf	2.08235e-06	0.000483433	up	yes
66853303	66879600	MSTRG.5646.19	11	1575	MSTRG.5646	PC	NA	NA	NA	NA	NA	0.002629	0	0.000905	0.008601	1.20047	2.25599	0.017243	6.39988	0.00122904	-9.66826	2.08263e-06	0.000483433	down	yes
63638027	63754684	ENST00000636392	10	1920	MSTRG.34045	ARHGEF9	GO:0005085(guanyl-nucleotide exchange factor activity);GO:0005089(Rho guanyl-nucleotide exchange factor activity);GO:0005515(protein binding);GO:0005737(cytoplasm);GO:0005829(cytosol);GO:0005886(plasma membrane);GO:0007186(G protein-coupled receptor signaling pathway);GO:0014069(postsynaptic density);GO:0016020(membrane);GO:0030054(cell junction);GO:0035023(regulation of Rho protein signal transd…	NA	K20686	NA	Cdc42 guanine nucleotide exchange factor 9 [Source:HGNC Symbol;Acc:HGNC:14561]	1.80569	2.18371	0	0.606067	0	0	0	0	inf	inf	2.10514e-06	0.000486799	up	yes
59565613	59573882	ENST00000584385	4	580	MSTRG.14859	DHX40	GO:0000166(nucleotide binding);GO:0000398(mRNA splicing, via spliceosome);GO:0003676(nucleic acid binding);GO:0003723(RNA binding);GO:0004386(helicase activity);GO:0005524(ATP binding);GO:0016787(hydrolase activity);GO:0034459(ATP-dependent 3'-5' RNA helicase activity)	NA	K18711	EC:3.6.4.13	DEAH-box helicase 40 [Source:HGNC Symbol;Acc:HGNC:18018]	0	0	0	0	0.925547	0.733894	1.54885	2.10616	-inf	-inf	2.12384e-06	0.000489264	down	yes
42682440	42697262	ENST00000332220	5	776	MSTRG.871	YBX1	GO:0000122(negative regulation of transcription by RNA polymerase II);GO:0000398(mRNA splicing, via spliceosome);GO:0000978(RNA polymerase II proximal promoter sequence-specific DNA binding);GO:0000981(DNA-binding transcription factor activity, RNA polymerase II-specific);GO:0001228(DNA-binding transcription activator activity, RNA polymerase II-specific);GO:0001701(in utero embryonic development…	NA	K09276	NA	Y-box binding protein 1 [Source:HGNC Symbol;Acc:HGNC:8014]	0	0	0	0	4.78131	2.01635	0	12.8341	-inf	-inf	2.16625e-06	0.00049715	down	yes
50329788	50340841	ENST00000357043	6	1864	MSTRG.22827	RASSF1	GO:0000922(spindle pole);GO:0005515(protein binding);GO:0005634(nucleus);GO:0005737(cytoplasm);GO:0005815(microtubule organizing center);GO:0005819(spindle);GO:0005856(cytoskeleton);GO:0005874(microtubule);GO:0007049(cell cycle);GO:0007050(cell cycle arrest);GO:0007165(signal transduction);GO:0007265(Ras protein signal transduction);GO:0008270(zinc ion binding);GO:0015630(microtubule cytoskeleton…	04014(Ras signaling pathway);04390(Hippo signaling pathway);04392(Hippo signaling pathway - multiple species);05200(Pathways in cancer);05206(MicroRNAs in cancer);05219(Bladder cancer);05223(Non-small cell lung cancer)	K09850	NA	Ras association domain family member 1 [Source:HGNC Symbol;Acc:HGNC:9882]	4.59324	0.017317	6.192	2.98245	0.004324	0.018243	0	0	610.848	9.25467	2.2024e-06	0.000503546	up	yes
49790842	49862846	MSTRG.9523.2	3	316	MSTRG.9523	RNU6-539P	NA	NA	NA	NA	NA	0	0	1689.36	714.078	0	0	0	0	inf	inf	2.2474e-06	0.000510229	up	yes
1823926	1958641	ENST00000349830	29	5648	MSTRG.30927	ARHGEF10	GO:0005085(guanyl-nucleotide exchange factor activity);GO:0005089(Rho guanyl-nucleotide exchange factor activity);GO:0005515(protein binding);GO:0005813(centrosome);GO:0005829(cytosol);GO:0019894(kinesin binding);GO:0022011(myelination in peripheral nervous system);GO:0030036(actin cytoskeleton organization);GO:0035023(regulation of Rho protein signal transduction);GO:0051298(centrosome duplicati…	NA	K16727	NA	Rho guanine nucleotide exchange factor 10 [Source:HGNC Symbol;Acc:HGNC:14103]	0	0	0	0.003372	0.815651	2.22486	0.98577	0.000714	0.000837349	-10.2219	2.24841e-06	0.000510229	down	yes
55132865	55146942	ENST00000585321	10	995	ENSG00000105048	TNNT1	GO:0003009(skeletal muscle contraction);GO:0005509(calcium ion binding);GO:0005515(protein binding);GO:0005523(tropomyosin binding);GO:0005829(cytosol);GO:0005861(troponin complex);GO:0006936(muscle contraction);GO:0006937(regulation of muscle contraction);GO:0014883(transition between fast and slow fiber);GO:0030049(muscle filament sliding);GO:0030899(calcium-dependent ATPase activity);GO:003101…	NA	K10372	NA	troponin T1, slow skeletal type [Source:HGNC Symbol;Acc:HGNC:11948]	0	0	0	0	1.26338	0.16298	1.26037	0.915722	-inf	-inf	2.32143e-06	0.000523441	down	yes
2475153	2503485	ENST00000293970	8	4340	MSTRG.11852	TBC1D24	GO:0005096(GTPase activator activity);GO:0005515(protein binding);GO:0005737(cytoplasm);GO:0005886(plasma membrane);GO:0016020(membrane);GO:0030054(cell junction);GO:0030659(cytoplasmic vesicle membrane);GO:0031175(neuron projection development);GO:0031410(cytoplasmic vesicle);GO:0031594(neuromuscular junction);GO:0043195(terminal bouton);GO:0043547(positive regulation of GTPase activity)	NA	K21841	NA	TBC1 domain family member 24 [Source:HGNC Symbol;Acc:HGNC:29203]	0.921858	0	0.199866	0.626832	0	0	0	0	inf	inf	2.32384e-06	0.000523441	up	yes
74479933	74493653	MSTRG.9917.3	6	944	MSTRG.9917	NPC2	NA	NA	NA	NA	NA	0	0	0.00815	0	7.94137	6.37255	0	7.69165	0.000370361	-11.3988	2.34647e-06	0.000526587	down	yes
19410539	19498747	MSTRG.12188.3	21	4239	MSTRG.12188	TMC5	NA	NA	NA	NA	NA	0	0	0	0	2.4265	3.91259	0	0.153955	-inf	-inf	2.44299e-06	0.000545602	down	yes
151166022	151169111	MSTRG.2079.3	7	845	MSTRG.2079	SCNM1	NA	NA	NA	NA	NA	3.91905	3.5517	1.1686	0	0	0	0	0	inf	inf	2.44914e-06	0.000545602	up	yes
128811288	128849112	ENST00000510308	5	564	MSTRG.25268	JADE1	GO:0000123(histone acetyltransferase complex);GO:0003713(transcription coactivator activity);GO:0005515(protein binding);GO:0005634(nucleus);GO:0005654(nucleoplasm);GO:0005737(cytoplasm);GO:0005856(cytoskeleton);GO:0005886(plasma membrane);GO:0006915(apoptotic process);GO:0016607(nuclear speck);GO:0030308(negative regulation of cell growth);GO:0036064(ciliary basal body);GO:0042995(cell projectio…	NA	K11347	NA	jade family PHD finger 1 [Source:HGNC Symbol;Acc:HGNC:30027]	5.63559	6.03663	1.7e-05	4.62466	0.010083	1.2e-05	1.2e-05	0	1612.44	10.655	2.50523e-06	0.000556061	up	yes
136147533	136211354	ENST00000651929	7	2368	MSTRG.34486	FHL1	GO:0003254(regulation of membrane depolarization);GO:0003674(molecular_function);GO:0005515(protein binding);GO:0005634(nucleus);GO:0005737(cytoplasm);GO:0005829(cytosol);GO:0005886(plasma membrane);GO:0005925(focal adhesion);GO:0007275(multicellular organism development);GO:0007517(muscle organ development);GO:0009887(animal organ morphogenesis);GO:0010972(negative regulation of G2/M transition …	04630(Jak-STAT signaling pathway)	K14365	NA	four and a half LIM domains 1 [Source:HGNC Symbol;Acc:HGNC:3702]	0.003092	0.003999	0.005433	0.001437	0.641707	0.32517	0.348442	0.711541	0.00688799	-7.1817	2.53987e-06	0.0005617	down	yes
202727412	202808052	ENST00000647757	26	6678	MSTRG.2753	KDM5B	GO:0000981(DNA-binding transcription factor activity, RNA polymerase II-specific);GO:0003677(DNA binding);GO:0003700(DNA-binding transcription factor activity);GO:0003714(transcription corepressor activity);GO:0005515(protein binding);GO:0005634(nucleus);GO:0005654(nucleoplasm);GO:0005829(cytosol);GO:0006325(chromatin organization);GO:0006338(chromatin remodeling);GO:0006357(regulation of transcr…	NA	K11446	EC:1.14.11.-	lysine demethylase 5B [Source:HGNC Symbol;Acc:HGNC:18039]	0.206818	0.26271	0.982878	0.008372	0.002806	0	0.000295	0	471.067	8.87979	2.57954e-06	0.000568405	up	yes
33090421	33096801	ENST00000416695	2	3451	MSTRG.22531	TMPPE	GO:0016020(membrane);GO:0016021(integral component of membrane);GO:0016787(hydrolase activity);GO:0046872(metal ion binding)	NA	NA	NA	transmembrane protein with metallophosphoesterase domain [Source:HGNC Symbol;Acc:HGNC:33865]	0.495251	0.40363	1.12845	0	0	0	0	0	inf	inf	2.63403e-06	0.000578318	up	yes
62804835	62813986	MSTRG.20916.1	8	1673	MSTRG.20916	OGFR	NA	NA	NA	NA	NA	0	0	0	0	0.797464	0	4.10433	1.30643	-inf	-inf	2.70531e-06	0.000590683	down	yes
32615571	32637903	ENST00000543522	13	3152	MSTRG.10421	ARHGAP11A	GO:0005096(GTPase activator activity);GO:0005829(cytosol);GO:0007165(signal transduction);GO:0043547(positive regulation of GTPase activity);GO:0051056(regulation of small GTPase mediated signal transduction)	NA	K20635	NA	Rho GTPase activating protein 11A [Source:HGNC Symbol;Acc:HGNC:15783]	0	0.125702	3.78139	4.83192	0	0	0	0	inf	inf	2.70978e-06	0.000590683	up	yes
102794386	102827948	ENST00000394804	8	4166	MSTRG.25022	UBE2D3	GO:0000122(negative regulation of transcription by RNA polymerase II);GO:0000151(ubiquitin ligase complex);GO:0000166(nucleotide binding);GO:0000209(protein polyubiquitination);GO:0002756(MyD88-independent toll-like receptor signaling pathway);GO:0004842(ubiquitin-protein transferase activity);GO:0005515(protein binding);GO:0005524(ATP binding);GO:0005654(nucleoplasm);GO:0005768(endosome);GO:0005…	04120(Ubiquitin mediated proteolysis);04141(Protein processing in endoplasmic reticulum)	K06689	EC:2.3.2.23	ubiquitin conjugating enzyme E2 D3 [Source:HGNC Symbol;Acc:HGNC:12476]	0.07828	4.39962	0	3.4381	0	0	0	0	inf	inf	2.74985e-06	0.000596551	up	yes
1445344	1475025	MSTRG.11771.4	26	3756	MSTRG.11771	CLCN7	NA	NA	NA	NA	NA	0	0	0	0	0	20.9981	0.186904	0.321811	-inf	-inf	2.75632e-06	0.000596551	down	yes
3904920	3911979	ENST00000566733	1	7060	MSTRG.27417	AL590004	NA	NA	NA	NA	novel transcript	2.11718	2.21202	2.66513	2.71289	0.154115	0.075202	0.104652	0.113218	21.7073	4.44011	2.78685e-06	0.000598703	up	yes
36572897	36677681	ENST00000545008	16	2236	MSTRG.32533	MELK	GO:0000086(G2/M transition of mitotic cell cycle);GO:0000166(nucleotide binding);GO:0004672(protein kinase activity);GO:0004674(protein serine/threonine kinase activity);GO:0004715(non-membrane spanning protein tyrosine kinase activity);GO:0005509(calcium ion binding);GO:0005515(protein binding);GO:0005524(ATP binding);GO:0005634(nucleus);GO:0005737(cytoplasm);GO:0005886(plasma membrane);GO:00059…	NA	K08799	EC:2.7.11.1	maternal embryonic leucine zipper kinase [Source:HGNC Symbol;Acc:HGNC:16870]	2.90212	0.524386	0	1.28581	0	0	0	0	inf	inf	2.8024e-06	0.000598703	up	yes
78551770	78610447	ENST00000264908	13	1432	MSTRG.24831	ANXA3	GO:0004859(phospholipase inhibitor activity);GO:0005509(calcium ion binding);GO:0005544(calcium-dependent phospholipid binding);GO:0005737(cytoplasm);GO:0005829(cytosol);GO:0005886(plasma membrane);GO:0006909(phagocytosis);GO:0007156(homophilic cell adhesion via plasma membrane adhesion molecules);GO:0010595(positive regulation of endothelial cell migration);GO:0016020(membrane);GO:0019834(phosph…	NA	NA	NA	annexin A3 [Source:HGNC Symbol;Acc:HGNC:541]	10.0567	17.3533	15.5905	15.018	0.21533	0.930635	0.054871	0.424637	35.6933	5.15758	2.80415e-06	0.000598703	up	yes
54325139	54350913	ENST00000455864	8	880	MSTRG.7394	COPZ1	GO:0000139(Golgi membrane);GO:0005737(cytoplasm);GO:0005789(endoplasmic reticulum membrane);GO:0005794(Golgi apparatus);GO:0005829(cytosol);GO:0006886(intracellular protein transport);GO:0006888(endoplasmic reticulum to Golgi vesicle-mediated transport);GO:0006890(retrograde vesicle-mediated transport, Golgi to endoplasmic reticulum);GO:0006891(intra-Golgi vesicle-mediated transport);GO:0015031(p…	NA	K20472	NA	coatomer protein complex subunit zeta 1 [Source:HGNC Symbol;Acc:HGNC:2243]	0	0	0	0	26.3359	0.304494	0	17.3892	-inf	-inf	2.80564e-06	0.000598703	down	yes
89244034	89264004	ENST00000563250	8	700	MSTRG.11524	FANCI	GO:0003677(DNA binding);GO:0005515(protein binding);GO:0005634(nucleus);GO:0005654(nucleoplasm);GO:0005829(cytosol);GO:0006281(DNA repair);GO:0006974(cellular response to DNA damage stimulus);GO:0007049(cell cycle);GO:0016020(membrane);GO:0031398(positive regulation of protein ubiquitination);GO:0036297(interstrand cross-link repair);GO:0070182(DNA polymerase binding)	03460(Fanconi anemia pathway)	K10895	NA	FA complementation group I [Source:HGNC Symbol;Acc:HGNC:25568]	0.85298	2.2056	9.97952	0.030437	0	0	0.016813	0	777.288	9.60231	2.84505e-06	0.000604991	up	yes
112647718	112659428	ENST00000413135	5	584	MSTRG.18941	SLC20A1	GO:0005315(inorganic phosphate transmembrane transporter activity);GO:0005316(high-affinity inorganic phosphate:sodium symporter activity);GO:0005436(sodium:phosphate symporter activity);GO:0005886(plasma membrane);GO:0005887(integral component of plasma membrane);GO:0006796(phosphate-containing compound metabolic process);GO:0006811(ion transport);GO:0006814(sodium ion transport);GO:0006817(phos…	NA	K14640	NA	solute carrier family 20 member 1 [Source:HGNC Symbol;Acc:HGNC:10946]	0	0	0	0	0	5.8039	1.39356	6.38454	-inf	-inf	2.90044e-06	0.00061462	down	yes
54122697	54879527	MSTRG.22919.5	19	1959	MSTRG.22919	CACNA2D3	NA	NA	NA	NA	NA	0	0	0.01648	0	4.42003	0.028735	4.24476	3.36561	0.0013666	-9.51519	2.91956e-06	0.000615781	down	yes
6476814	6481434	ENST00000423813	7	1430	MSTRG.4910	ARFIP2	GO:0001726(ruffle);GO:0005515(protein binding);GO:0005525(GTP binding);GO:0005543(phospholipid binding);GO:0005737(cytoplasm);GO:0005829(cytosol);GO:0005886(plasma membrane);GO:0005938(cell cortex);GO:0006886(intracellular protein transport);GO:0007264(small GTPase mediated signal transduction);GO:0019904(protein domain specific binding);GO:0030032(lamellipodium assembly);GO:0030036(actin cytoske…	NA	K20314	NA	ADP ribosylation factor interacting protein 2 [Source:HGNC Symbol;Acc:HGNC:17160]	0	0	0	0	1.12091	1.99304	1.7483	0	-inf	-inf	2.93795e-06	0.000615781	down	yes
112978402	113011718	ENST00000392583	10	4734	MSTRG.8120	OAS2	GO:0000166(nucleotide binding);GO:0001730(2'-5'-oligoadenylate synthetase activity);GO:0002376(immune system process);GO:0003723(RNA binding);GO:0003725(double-stranded RNA binding);GO:0005515(protein binding);GO:0005524(ATP binding);GO:0005634(nucleus);GO:0005654(nucleoplasm);GO:0005737(cytoplasm);GO:0005829(cytosol);GO:0006139(nucleobase-containing compound metabolic process);GO:0006401(RNA cat…	04621(NOD-like receptor signaling pathway);05160(Hepatitis C);05162(Measles);05164(Influenza A);05168(Herpes simplex virus 1 infection);05169(Epstein-Barr virus infection)	NA	NA	2'-5'-oligoadenylate synthetase 2 [Source:HGNC Symbol;Acc:HGNC:8087]	0.040263	0.080146	0.008487	0.068947	1.80322	2.10855	1.87145	2.405	0.0241619	-5.37112	2.94405e-06	0.000615781	down	yes
39825715	39834158	ENST00000430012	11	2007	MSTRG.17192	DYRK1B	GO:0000166(nucleotide binding);GO:0003713(transcription coactivator activity);GO:0004672(protein kinase activity);GO:0004674(protein serine/threonine kinase activity);GO:0004712(protein serine/threonine/tyrosine kinase activity);GO:0004713(protein tyrosine kinase activity);GO:0005515(protein binding);GO:0005524(ATP binding);GO:0005634(nucleus);GO:0006468(protein phosphorylation);GO:0007520(myobla…	NA	K08825	EC:2.7.12.1	dual specificity tyrosine phosphorylation regulated kinase 1B [Source:HGNC Symbol;Acc:HGNC:3092]	0	0	0	0	1.26753	0.568615	0	1.76341	-inf	-inf	2.95041e-06	0.000615781	down	yes
159918122	159924597	MSTRG.2292.3	5	1421	MSTRG.2292	TAGLN2	NA	NA	NA	NA	NA	72.512	0.03435	60.1321	0.04306	0.018929	0.066312	0.078263	0.040013	652.14	9.34904	2.95654e-06	0.000615781	up	yes
79396225	79527577	ENST00000427363	10	2832	ENSG00000131196	NFATC1	GO:0000790(nuclear chromatin);GO:0000977(RNA polymerase II regulatory region sequence-specific DNA binding);GO:0000978(RNA polymerase II proximal promoter sequence-specific DNA binding);GO:0000980(RNA polymerase II distal enhancer sequence-specific DNA binding);GO:0000981(DNA-binding transcription factor activity, RNA polymerase II-specific);GO:0001085(RNA polymerase II transcription factor bindi…	04010(MAPK signaling pathway);04022(cGMP-PKG signaling pathway);04024(cAMP signaling pathway);04218(Cellular senescence);04310(Wnt signaling pathway);04380(Osteoclast differentiation);04625(C-type lectin receptor signaling pathway);04650(Natural killer cell mediated cytotoxicity);04658(Th1 and Th2 cell differentiation);04659(Th17 cell differentiation);04660(T cell receptor signaling pathway);0466…	K04446	NA	nuclear factor of activated T cells 1 [Source:HGNC Symbol;Acc:HGNC:7775]	0.015387	0.409004	0.705496	0.380933	0	0	0	0	inf	inf	3.0045e-06	0.000623634	up	yes
28820348	29505947	ENST00000612955	16	7430	MSTRG.8535	MTUS2	GO:0005515(protein binding);GO:0005634(nucleus);GO:0005737(cytoplasm);GO:0005813(centrosome);GO:0005856(cytoskeleton);GO:0005874(microtubule);GO:0005881(cytoplasmic microtubule);GO:0008017(microtubule binding);GO:0015630(microtubule cytoskeleton);GO:0042803(protein homodimerization activity);GO:0045171(intercellular bridge)	NA	NA	NA	microtubule associated scaffold protein 2 [Source:HGNC Symbol;Acc:HGNC:20595]	0	0	0.020402	0	0.913215	1.63359	1.32978	1.16975	0.00404293	-7.95038	3.04143e-06	0.000629152	down	yes
202377434	202567751	ENST00000374574	12	9683	MSTRG.19773	BMPR2	GO:0000166(nucleotide binding);GO:0001707(mesoderm formation);GO:0001893(maternal placenta development);GO:0001935(endothelial cell proliferation);GO:0001938(positive regulation of endothelial cell proliferation);GO:0001946(lymphangiogenesis);GO:0001974(blood vessel remodeling);GO:0002063(chondrocyte development);GO:0003085(negative regulation of systemic arterial blood pressure);GO:0003148(outfl…	04060(Cytokine-cytokine receptor interaction);04350(TGF-beta signaling pathway);04360(Axon guidance);04390(Hippo signaling pathway);04550(Signaling pathways regulating pluripotency of stem cells);05206(MicroRNAs in cancer);05418(Fluid shear stress and atherosclerosis)	NA	NA	bone morphogenetic protein receptor type 2 [Source:HGNC Symbol;Acc:HGNC:1078]	0	0.297933	0.162499	0.223499	0	0	0	0	inf	inf	3.17745e-06	0.000655062	up	yes
36389821	36453791	ENST00000396068	23	4661	MSTRG.29636	ANLN	GO:0000281(mitotic cytokinesis);GO:0000915(actomyosin contractile ring assembly);GO:0000921(septin ring assembly);GO:0002244(hematopoietic progenitor cell differentiation);GO:0003779(actin binding);GO:0005634(nucleus);GO:0005654(nucleoplasm);GO:0005737(cytoplasm);GO:0005826(actomyosin contractile ring);GO:0005856(cytoskeleton);GO:0005938(cell cortex);GO:0007049(cell cycle);GO:0007096(regulation o…	NA	K18621	NA	anillin actin binding protein [Source:HGNC Symbol;Acc:HGNC:14082]	0	0	0	0	1.32827	0.149128	1.45474	0	-inf	-inf	3.2062e-06	0.000658754	down	yes
122384198	122409917	MSTRG.23280.3	5	615	MSTRG.23280	FAM162A	NA	NA	NA	NA	NA	0	0	0	0	8.27747	0	6.30918	1.17097	-inf	-inf	3.22921e-06	0.000661249	down	yes
4776442	4954510	ENST00000472453	6	1764	MSTRG.27434	CDYL	GO:0003682(chromatin binding);GO:0003714(transcription corepressor activity);GO:0003824(catalytic activity);GO:0005515(protein binding);GO:0005634(nucleus);GO:0005694(chromosome);GO:0007283(spermatogenesis);GO:0007286(spermatid development);GO:0016020(membrane);GO:0016021(integral component of membrane);GO:0016607(nuclear speck);GO:0016829(lyase activity);GO:0030154(cell differentiation);GO:00306…	NA	K00653	EC:2.3.1.48	chromodomain Y like [Source:HGNC Symbol;Acc:HGNC:1811]	0	0	0	0	7.43583	0	1.70003	0.685844	-inf	-inf	3.25031e-06	0.000663335	down	yes
8693352	8810674	ENST00000313726	20	4341	MSTRG.4950	ST5	GO:0005085(guanyl-nucleotide exchange factor activity);GO:0005737(cytoplasm);GO:0005768(endosome);GO:0005886(plasma membrane);GO:0005938(cell cortex);GO:0016020(membrane);GO:0017112(Rab guanyl-nucleotide exchange factor activity);GO:0055037(recycling endosome)	NA	K20161	NA	suppression of tumorigenicity 5 [Source:HGNC Symbol;Acc:HGNC:11350]	0.822708	0.02734	0.594618	1.33129	0.005233	0.009701	0	0.007955	121.279	6.92219	3.29957e-06	0.000669785	up	yes
27869899	27977108	MSTRG.31123.2	8	3490	MSTRG.31123	SCARA5	NA	NA	NA	NA	NA	0	0.004323	0.030296	0.005663	1.40016	1.24549	1.34885	0.188462	0.00963002	-6.69825	3.30872e-06	0.000669785	down	yes
56521820	56596193	ENST00000262031	14	8488	MSTRG.7466	RBMS2	GO:0003676(nucleic acid binding);GO:0003723(RNA binding);GO:0003730(mRNA 3'-UTR binding);GO:0005634(nucleus);GO:0005737(cytoplasm);GO:0005829(cytosol);GO:0006396(RNA processing);GO:0008143(poly(A) binding);GO:0008266(poly(U) RNA binding);GO:1990904(ribonucleoprotein complex)	NA	NA	NA	RNA binding motif single stranded interacting protein 2 [Source:HGNC Symbol;Acc:HGNC:9909]	0	0.004122	0	0.013238	0.161509	5.50098	0.669898	0.227929	0.00264621	-8.56185	3.31495e-06	0.000669785	down	yes
43970025	43973340	ENST00000396758	5	1738	MSTRG.913	DPH2	GO:0005515(protein binding);GO:0005829(cytosol);GO:0016740(transferase activity);GO:0017183(peptidyl-diphthamide biosynthetic process from peptidyl-histidine);GO:0090560(2-(3-amino-3-carboxypropyl)histidine synthase activity)	NA	K17866	NA	DPH2 homolog [Source:HGNC Symbol;Acc:HGNC:3004]	0	0.953577	5.11022	0.782265	0	0	0	0	inf	inf	3.35581e-06	0.000675797	up	yes
8206428	8251839	MSTRG.21098.18	2	1390	MSTRG.21098	FP671120	NA	NA	NA	NA	NA	0	0	0	0	0	0	710.52	110.398	-inf	-inf	3.42125e-06	0.0006867	down	yes
46029916	46223676	ENST00000572904	15	4973	MSTRG.14590	KANSL1	GO:0000123(histone acetyltransferase complex);GO:0000775(chromosome, centromeric region);GO:0000776(kinetochore);GO:0000777(condensed chromosome kinetochore);GO:0005515(protein binding);GO:0005634(nucleus);GO:0005654(nucleoplasm);GO:0005694(chromosome);GO:0006325(chromatin organization);GO:0035035(histone acetyltransferase binding);GO:0043981(histone H4-K5 acetylation);GO:0043982(histone H4-K8 ac…	NA	K18400	NA	KAT8 regulatory NSL complex subunit 1 [Source:HGNC Symbol;Acc:HGNC:24565]	0.000472	5.96096	0.067113	1.74169	8.8e-05	0.002844	0.000628	0.000864	1756.38	10.7784	3.47495e-06	0.000695185	up	yes
49095933	49104420	ENST00000636669	24	2410	MSTRG.22775	QARS	GO:0000166(nucleotide binding);GO:0004812(aminoacyl-tRNA ligase activity);GO:0004819(glutamine-tRNA ligase activity);GO:0004860(protein kinase inhibitor activity);GO:0005515(protein binding);GO:0005524(ATP binding);GO:0005737(cytoplasm);GO:0005759(mitochondrial matrix);GO:0005829(cytosol);GO:0006412(translation);GO:0006418(tRNA aminoacylation for protein translation);GO:0006425(glutaminyl-tRNA am…	00970(Aminoacyl-tRNA biosynthesis)	K01886	EC:6.1.1.18	glutaminyl-tRNA synthetase [Source:HGNC Symbol;Acc:HGNC:9751]	0.077636	11.5666	4.44048	0	0	0	0	0	inf	inf	3.53625e-06	0.000705129	up	yes
80207656	80214722	ENST00000572257	5	581	MSTRG.15308	SGSH	GO:0003824(catalytic activity);GO:0005764(lysosome);GO:0006027(glycosaminoglycan catabolic process);GO:0008484(sulfuric ester hydrolase activity);GO:0016250(N-sulfoglucosamine sulfohydrolase activity);GO:0016787(hydrolase activity);GO:0030200(heparan sulfate proteoglycan catabolic process);GO:0043202(lysosomal lumen);GO:0046872(metal ion binding);GO:0070062(extracellular exosome)	00531(Glycosaminoglycan degradation);04142(Lysosome)	K01565	EC:3.10.1.1	N-sulfoglucosamine sulfohydrolase [Source:HGNC Symbol;Acc:HGNC:10818]	0	0	0.024808	0.028715	4.83425	5.52561	0.046064	4.67619	0.00354877	-8.13846	3.5662e-06	0.000708777	down	yes
155765449	155773420	ENST00000497369	4	1884	MSTRG.2234	GON4L	GO:0000981(DNA-binding transcription factor activity, RNA polymerase II-specific);GO:0003677(DNA binding);GO:0003714(transcription corepressor activity);GO:0005634(nucleus);GO:0005654(nucleoplasm);GO:0006355(regulation of transcription, DNA-templated);GO:0006357(regulation of transcription by RNA polymerase II);GO:0016604(nuclear body);GO:0030183(B cell differentiation);GO:0045892(negative regula…	NA	NA	NA	gon-4 like [Source:HGNC Symbol;Acc:HGNC:25973]	0.378827	0.728801	0.586953	0.582289	2.9e-05	4.8e-05	0.006884	0.001599	265.989	8.05523	3.58346e-06	0.000709888	up	yes
69191806	69241449	ENST00000409242	9	2496	MSTRG.9823	EXD2	GO:0000724(double-strand break repair via homologous recombination);GO:0000729(DNA double-strand break processing);GO:0003676(nucleic acid binding);GO:0004518(nuclease activity);GO:0004527(exonuclease activity);GO:0005515(protein binding);GO:0005634(nucleus);GO:0005737(cytoplasm);GO:0006139(nucleobase-containing compound metabolic process);GO:0006302(double-strand break repair);GO:0008310(single-…	NA	K20777	EC:3.1.11.1	exonuclease 3'-5' domain containing 2 [Source:HGNC Symbol;Acc:HGNC:20217]	0.671029	0.667025	3.1e-05	0.961246	0	0	0	0	inf	inf	3.62133e-06	0.00071506	up	yes
23022642	23035145	MSTRG.9233.2	4	1338	MSTRG.9233	PSMB5	NA	NA	NA	NA	NA	0	0	0.01677	0	16.5215	23.544	5.12366	0	0.000371107	-11.3959	3.67817e-06	0.000723934	down	yes
6451264	6556460	ENST00000421306	19	6945	MSTRG.13498	PITPNM3	GO:0004620(phospholipase activity);GO:0005509(calcium ion binding);GO:0005515(protein binding);GO:0005829(cytosol);GO:0006661(phosphatidylinositol biosynthetic process);GO:0006888(endoplasmic reticulum to Golgi vesicle-mediated transport);GO:0008289(lipid binding);GO:0012505(endomembrane system);GO:0016020(membrane);GO:0030134(COPII-coated ER to Golgi transport vesicle);GO:0030971(receptor tyrosi…	NA	NA	NA	PITPNM family member 3 [Source:HGNC Symbol;Acc:HGNC:21043]	0	0	0	0	0	0.164189	0.340787	0.525247	-inf	-inf	3.82401e-06	0.000750209	down	yes
70656802	70702308	ENST00000379983	19	4859	MSTRG.11158	UACA	GO:0003674(molecular_function);GO:0005515(protein binding);GO:0005576(extracellular region);GO:0005634(nucleus);GO:0005737(cytoplasm);GO:0005829(cytosol);GO:0005856(cytoskeleton);GO:0008150(biological_process);GO:0070062(extracellular exosome);GO:0097190(apoptotic signaling pathway);GO:1901222(regulation of NIK/NF-kappaB signaling)	NA	NA	NA	uveal autoantigen with coiled-coil domains and ankyrin repeats [Source:HGNC Symbol;Acc:HGNC:15947]	1.52035	0.042862	0.671696	2.34431	0.0107	0.022719	0.004761	0.011223	92.6912	6.53436	3.87877e-06	0.000758505	up	yes
74354456	74364620	ENST00000562009	2	3337	MSTRG.11220	PPIAP46	NA	NA	NA	NA	peptidylprolyl isomerase A pseudogene 46 [Source:HGNC Symbol;Acc:HGNC:53670]	0.118422	1.5e-05	0.041374	1.2e-05	3.3016	4.2196	3.52187	2.51669	0.0117866	-6.40671	3.89523e-06	0.000758925	down	yes
190690378	190844594	MSTRG.19662.5	5	620	MSTRG.19662	AC006460	NA	NA	NA	NA	NA	0	0	0	0	5.04908	0	4.08163	2.06677	-inf	-inf	3.90588e-06	0.000758925	down	yes
11183301	11232682	ENST00000620854	6	4086	MSTRG.27507	NEDD9	GO:0000922(spindle pole);GO:0005515(protein binding);GO:0005634(nucleus);GO:0005654(nucleoplasm);GO:0005737(cytoplasm);GO:0005794(Golgi apparatus);GO:0005819(spindle);GO:0005829(cytosol);GO:0005856(cytoskeleton);GO:0005886(plasma membrane);GO:0005925(focal adhesion);GO:0005938(cell cortex);GO:0007010(cytoskeleton organization);GO:0007049(cell cycle);GO:0007155(cell adhesion);GO:0007165(signal tra…	NA	K16832	NA	neural precursor cell expressed, developmentally down-regulated 9 [Source:HGNC Symbol;Acc:HGNC:7733]	0	8.7584	0.046583	1.47301	0	0	0	0	inf	inf	3.9268e-06	0.000760562	up	yes
29808630	29811206	MSTRG.12416.2	2	1105	MSTRG.12416	AC009133	NA	NA	NA	NA	NA	3.89091	2.28561	0.10139	0.004194	0	0	0	0	inf	inf	4.05975e-06	0.000783815	up	yes
49836025	49862849	MSTRG.9522.18	3	652	MSTRG.9522	NEMF	NA	NA	NA	NA	NA	273.801	163.499	0.572578	0.135151	0.239432	0.404462	0.352651	0.37013	320.491	8.32414	4.11781e-06	0.000792509	up	yes
35696948	35732195	ENST00000314888	57	8623	MSTRG.32499	TLN1	GO:0001726(ruffle);GO:0001786(phosphatidylserine binding);GO:0002576(platelet degranulation);GO:0003779(actin binding);GO:0005178(integrin binding);GO:0005200(structural constituent of cytoskeleton);GO:0005515(protein binding);GO:0005576(extracellular region);GO:0005737(cytoplasm);GO:0005829(cytosol);GO:0005856(cytoskeleton);GO:0005886(plasma membrane);GO:0005925(focal adhesion);GO:0006936(muscle…	04015(Rap1 signaling pathway);04510(Focal adhesion);04611(Platelet activation);05166(Human T-cell leukemia virus 1 infection)	K06271	NA	talin 1 [Source:HGNC Symbol;Acc:HGNC:11845]	0.568861	0.914881	0.62727	0.582049	31.6781	0.586357	28.2451	33.6333	0.0286061	-5.12753	4.16902e-06	0.000799833	down	yes
210187923	210225447	MSTRG.19850.2	10	3968	MSTRG.19850	ACADL	NA	NA	NA	NA	NA	1.96201	1.35444	0.973806	1.6443	0.062125	0.063418	0.048607	0.030073	29.0592	4.86092	4.25273e-06	0.000813328	up	yes
46084150	46098315	ENST00000586592	12	2214	MSTRG.15844	ATP5F1A	GO:0000166(nucleotide binding);GO:0000275(mitochondrial proton-transporting ATP synthase complex, catalytic core F(1));GO:0001937(negative regulation of endothelial cell proliferation);GO:0003723(RNA binding);GO:0005515(protein binding);GO:0005524(ATP binding);GO:0005739(mitochondrion);GO:0005743(mitochondrial inner membrane);GO:0005753(mitochondrial proton-transporting ATP synthase complex);GO:0…	00190(Oxidative phosphorylation);04714(Thermogenesis);05010(Alzheimer disease);05012(Parkinson disease);05016(Huntington disease)	NA	NA	ATP synthase F1 subunit alpha [Source:HGNC Symbol;Acc:HGNC:823]	56.3809	0	78.3506	0	0	0	0	0	inf	inf	4.27136e-06	0.000814331	up	yes
31121673	31266949	ENST00000378680	13	1858	MSTRG.33791	DMD	GO:0001954(positive regulation of cell-matrix adhesion);GO:0002027(regulation of heart rate);GO:0002162(dystroglycan binding);GO:0003779(actin binding);GO:0005178(integrin binding);GO:0005200(structural constituent of cytoskeleton);GO:0005515(protein binding);GO:0005521(lamin binding);GO:0005634(nucleus);GO:0005737(cytoplasm);GO:0005741(mitochondrial outer membrane);GO:0005794(Golgi apparatus);GO…	05410(Hypertrophic cardiomyopathy (HCM));05412(Arrhythmogenic right ventricular cardiomyopathy (ARVC));05414(Dilated cardiomyopathy (DCM));05416(Viral myocarditis)	K10366	NA	dystrophin [Source:HGNC Symbol;Acc:HGNC:2928]	0.584252	0	0.40121	3.57262	0	0	0	0	inf	inf	4.51863e-06	0.00085878	up	yes
31180151	31191558	MSTRG.12508.7	14	1596	MSTRG.12508	FUS	NA	NA	NA	NA	NA	0	0	0	0	0.534228	6.85531	1.33169	0	-inf	-inf	4.58293e-06	0.000867808	down	yes
85318486	85578363	ENST00000426972	7	4017	MSTRG.1420	DDAH1	GO:0000052(citrulline metabolic process);GO:0003073(regulation of systemic arterial blood pressure);GO:0003824(catalytic activity);GO:0005829(cytosol);GO:0006525(arginine metabolic process);GO:0006527(arginine catabolic process);GO:0007263(nitric oxide mediated signal transduction);GO:0008285(negative regulation of cell population proliferation);GO:0016403(dimethylargininase activity);GO:0016597(…	NA	K01482	EC:3.5.3.18	dimethylarginine dimethylaminohydrolase 1 [Source:HGNC Symbol;Acc:HGNC:2715]	1.85191	2.17333	0	0.090003	0	0	0	0	inf	inf	4.59467e-06	0.000867808	up	yes
22710970	22914270	ENST00000374632	16	3677	MSTRG.459	EPHB2	GO:0000166(nucleotide binding);GO:0000902(cell morphogenesis);GO:0001525(angiogenesis);GO:0001540(amyloid-beta binding);GO:0001655(urogenital system development);GO:0001933(negative regulation of protein phosphorylation);GO:0004672(protein kinase activity);GO:0004713(protein tyrosine kinase activity);GO:0004714(transmembrane receptor protein tyrosine kinase activity);GO:0005003(ephrin receptor ac…	04360(Axon guidance)	NA	NA	EPH receptor B2 [Source:HGNC Symbol;Acc:HGNC:3393]	1.64396	1.56181	0	0.110567	0	0	0	0	inf	inf	4.80889e-06	0.000905456	up	yes
141551419	141653857	ENST00000647568	16	2636	MSTRG.30678	AGK	GO:0000166(nucleotide binding);GO:0001727(lipid kinase activity);GO:0001729(ceramide kinase activity);GO:0003951(NAD+ kinase activity);GO:0004143(diacylglycerol kinase activity);GO:0005524(ATP binding);GO:0005739(mitochondrion);GO:0005741(mitochondrial outer membrane);GO:0005743(mitochondrial inner membrane);GO:0005758(mitochondrial intermembrane space);GO:0005829(cytosol);GO:0016020(membrane);GO…	00561(Glycerolipid metabolism)	K09881	EC:2.7.1.94	acylglycerol kinase [Source:HGNC Symbol;Acc:HGNC:21869]	0.009555	0	0.007621	0.006615	0.017517	2.22869	0.811042	0.697287	0.0063366	-7.30208	4.84376e-06	0.000909206	down	yes
70137981	70146656	ENST00000335494	2	3397	MSTRG.3955	TYSND1	GO:0002020(protease binding);GO:0004252(serine-type endopeptidase activity);GO:0005777(peroxisome);GO:0005782(peroxisomal matrix);GO:0005829(cytosol);GO:0006508(proteolysis);GO:0006625(protein targeting to peroxisome);GO:0008233(peptidase activity);GO:0008236(serine-type peptidase activity);GO:0016020(membrane);GO:0016485(protein processing);GO:0016787(hydrolase activity);GO:0031998(regulation of…	NA	K23012	EC:3.4.21.-	trypsin domain containing 1 [Source:HGNC Symbol;Acc:HGNC:28531]	0	0	0	0	1.63628	0.314707	0	0.270545	-inf	-inf	4.9115e-06	0.000919085	down	yes
78255246	78338037	ENST00000508900	15	2169	MSTRG.24827	FRAS1	GO:0002009(morphogenesis of an epithelium);GO:0003338(metanephros morphogenesis);GO:0005201(extracellular matrix structural constituent);GO:0005515(protein binding);GO:0005604(basement membrane);GO:0005886(plasma membrane);GO:0007154(cell communication);GO:0015031(protein transport);GO:0016020(membrane);GO:0016021(integral component of membrane);GO:0030326(embryonic limb morphogenesis);GO:0043588…	NA	NA	NA	Fraser extracellular matrix complex subunit 1 [Source:HGNC Symbol;Acc:HGNC:19185]	0.61514	1.768	0.304786	0.769598	0.03191	0	0	0	108.352	6.75959	5.02686e-06	0.000937788	up	yes
154506171	154516116	ENST00000369643	10	1521	MSTRG.34614	FAM3A	GO:0003674(molecular_function);GO:0005515(protein binding);GO:0005575(cellular_component);GO:0005576(extracellular region);GO:0016020(membrane);GO:0016021(integral component of membrane);GO:0019732(antifungal humoral response);GO:0045721(negative regulation of gluconeogenesis);GO:0046890(regulation of lipid biosynthetic process);GO:0061844(antimicrobial humoral immune response mediated by antimic…	NA	NA	NA	family with sequence similarity 3 member A [Source:HGNC Symbol;Acc:HGNC:13749]	1.67366	1.026	1.38048	0	0	0	0	0	inf	inf	5.0573e-06	0.000940581	up	yes
11013716	11024183	ENST00000315091	6	1835	MSTRG.265	TARDBP	GO:0001228(DNA-binding transcription activator activity, RNA polymerase II-specific);GO:0001933(negative regulation of protein phosphorylation);GO:0003676(nucleic acid binding);GO:0003677(DNA binding);GO:0003690(double-stranded DNA binding);GO:0003700(DNA-binding transcription factor activity);GO:0003723(RNA binding);GO:0003727(single-stranded RNA binding);GO:0003730(mRNA 3'-UTR binding);GO:00055…	NA	NA	NA	TAR DNA binding protein [Source:HGNC Symbol;Acc:HGNC:11571]	0	0	0.004961	0	4.2523	0	1.37443	2.1555	0.000637478	-10.6153	5.12611e-06	0.000950472	down	yes
30821674	30907632	MSTRG.21811.16	13	3655	MSTRG.21811	OSBP2	NA	NA	NA	NA	NA	0	0	0	0	0.336001	0	2.60228	0.276523	-inf	-inf	5.34449e-06	0.000986514	down	yes
156106716	156139103	MSTRG.2232.9	12	2560	MSTRG.2232	LMNA	NA	NA	NA	NA	NA	0.234514	0.004187	0.217747	0.011738	10.2456	0.328622	13.6503	49.1468	0.00638105	-7.29199	5.35294e-06	0.000986514	down	yes
4945767	4949014	MSTRG.13453.9	5	747	MSTRG.13453	PFN1	NA	NA	NA	NA	NA	0	114.914	0	189.661	0	0	0	0	inf	inf	5.53088e-06	0.00101623	up	yes
76351797	76559771	ENST00000261183	24	7204	MSTRG.7725	OSBPL8	GO:0001786(phosphatidylserine binding);GO:0005548(phospholipid transporter activity);GO:0005634(nucleus);GO:0005783(endoplasmic reticulum);GO:0005789(endoplasmic reticulum membrane);GO:0005829(cytosol);GO:0006869(lipid transport);GO:0008289(lipid binding);GO:0010891(negative regulation of sequestering of triglyceride);GO:0015248(sterol transporter activity);GO:0015485(cholesterol binding);GO:0015…	NA	K22285	NA	oxysterol binding protein like 8 [Source:HGNC Symbol;Acc:HGNC:16396]	0.000415	0.000251	0.000426	0.000179	0.000274	10.8779	0.000221	1.17771	0.000105424	-13.2115	5.57233e-06	0.00102076	down	yes
56011068	56051288	MSTRG.29793.6	10	2181	MSTRG.29793	PSPH	NA	NA	NA	NA	NA	0	0	0	0	0.142765	5.37535	0	2.44032	-inf	-inf	5.6363e-06	0.00102801	down	yes
56361560	56403117	ENST00000492830	7	2249	MSTRG.12656	AMFR	GO:0000209(protein polyubiquitination);GO:0004842(ubiquitin-protein transferase activity);GO:0005515(protein binding);GO:0005634(nucleus);GO:0005737(cytoplasm);GO:0005783(endoplasmic reticulum);GO:0005789(endoplasmic reticulum membrane);GO:0005794(Golgi apparatus);GO:0006457(protein folding);GO:0006511(ubiquitin-dependent protein catabolic process);GO:0007165(signal transduction);GO:0007568(aging…	04141(Protein processing in endoplasmic reticulum)	NA	NA	autocrine motility factor receptor [Source:HGNC Symbol;Acc:HGNC:463]	0	0	0	0	0.249317	0	1.09149	6.0759	-inf	-inf	5.6457e-06	0.00102801	down	yes
75601927	75663505	MSTRG.28451.4	8	1482	MSTRG.28451	SENP6	NA	NA	NA	NA	NA	0	0	0	0	0	0.585535	2.70466	1.44311	-inf	-inf	5.68559e-06	0.0010295	down	yes
95772554	96098424	ENST00000447467	17	2947	MSTRG.30134	DYNC1I1	GO:0000775(chromosome, centromeric region);GO:0000776(kinetochore);GO:0000777(condensed chromosome kinetochore);GO:0000922(spindle pole);GO:0003774(motor activity);GO:0003777(microtubule motor activity);GO:0005515(protein binding);GO:0005634(nucleus);GO:0005694(chromosome);GO:0005737(cytoplasm);GO:0005829(cytosol);GO:0005856(cytoskeleton);GO:0005868(cytoplasmic dynein complex);GO:0005874(microtub…	04145(Phagosome);04962(Vasopressin-regulated water reabsorption);05132(Salmonella infection)	K10415	NA	dynein cytoplasmic 1 intermediate chain 1 [Source:HGNC Symbol;Acc:HGNC:2963]	0	1.38027	0.104421	1.01613	0	0	0	0	inf	inf	5.69919e-06	0.0010295	up	yes
16740516	16896143	MSTRG.366.11	2	276	MSTRG.366	CROCCP4	NA	NA	NA	NA	NA	0	1219.06	1342.85	0	0	0	0	1e-06	2561904663	31.2546	5.7149e-06	0.0010295	up	yes
43197997	43205638	ENST00000451895	4	996	MSTRG.17274	PSG4	GO:0005576(extracellular region);GO:0007565(female pregnancy)	NA	NA	NA	pregnancy specific beta-1-glycoprotein 4 [Source:HGNC Symbol;Acc:HGNC:9521]	1.7465	2.10697	0.909522	0.538097	0	0	0.032792	0	161.658	7.3368	5.73256e-06	0.0010295	up	yes
2752716	2763501	ENST00000571378	10	2870	MSTRG.11886	SRRM2	GO:0000398(mRNA splicing, via spliceosome);GO:0003723(RNA binding);GO:0005515(protein binding);GO:0005634(nucleus);GO:0005654(nucleoplasm);GO:0005681(spliceosomal complex);GO:0006397(mRNA processing);GO:0008380(RNA splicing);GO:0015030(Cajal body);GO:0016607(nuclear speck);GO:0047485(protein N-terminus binding);GO:0070742(C2H2 zinc finger domain binding);GO:0071007(U2-type catalytic step 2 splice…	NA	K13172	NA	serine/arginine repetitive matrix 2 [Source:HGNC Symbol;Acc:HGNC:16639]	0	34.816	35.4698	0	0	0	0	0	inf	inf	5.73852e-06	0.0010295	up	yes
112906973	112919875	MSTRG.8117.5	5	3233	MSTRG.8117	OAS1	NA	NA	NA	NA	NA	0.165643	0.043193	0.075695	0.134516	3.34596	2.32594	3.22595	3.75769	0.0331117	-4.91651	5.78107e-06	0.00103408	down	yes
35305417	35397842	MSTRG.734.6	20	3727	MSTRG.734	ZMYM4	NA	NA	NA	NA	NA	1.98624	0.109113	1.90311	2.72833	0.019949	0.00371	0.035726	0.045302	64.2563	6.00577	5.84738e-06	0.00104287	up	yes
39410266	39486217	MSTRG.823.31	41	11289	MSTRG.823	MACF1	NA	NA	NA	NA	NA	0	0	0	0	11.561	9.86623	0	0	-inf	-inf	5.88577e-06	0.00104665	down	yes
179839967	179877782	MSTRG.2550.2	7	8561	MSTRG.2550	TOR1AIP2	NA	NA	NA	NA	NA	0	0	0	0	0	0.277017	0.454225	0.082028	-inf	-inf	6.02859e-06	0.00106892	down	yes
150113839	150155845	ENST00000261799	23	5700	MSTRG.27048	PDGFRB	GO:0000165(MAPK cascade);GO:0000166(nucleotide binding);GO:0002244(hematopoietic progenitor cell differentiation);GO:0004672(protein kinase activity);GO:0004713(protein tyrosine kinase activity);GO:0004714(transmembrane receptor protein tyrosine kinase activity);GO:0004992(platelet activating factor receptor activity);GO:0005017(platelet-derived growth factor-activated receptor activity);GO:00050…	01521(EGFR tyrosine kinase inhibitor resistance);04010(MAPK signaling pathway);04014(Ras signaling pathway);04015(Rap1 signaling pathway);04020(Calcium signaling pathway);04072(Phospholipase D signaling pathway);04151(PI3K-Akt signaling pathway);04510(Focal adhesion);04540(Gap junction);04630(Jak-STAT signaling pathway);04810(Regulation of actin cytoskeleton);05165(Human papillomavirus infection)…	NA	NA	platelet derived growth factor receptor beta [Source:HGNC Symbol;Acc:HGNC:8804]	0	0.000398	0	0	1.55735	0	0.276246	1.28355	0.000127681	-12.9352	6.05801e-06	0.00107102	down	yes
56457989	56851916	ENST00000312431	95	17756	MSTRG.28343	DST	GO:0002162(dystroglycan binding);GO:0003779(actin binding);GO:0005178(integrin binding);GO:0005198(structural molecule activity);GO:0005509(calcium ion binding);GO:0005515(protein binding);GO:0005604(basement membrane);GO:0005634(nucleus);GO:0005635(nuclear envelope);GO:0005737(cytoplasm);GO:0005783(endoplasmic reticulum);GO:0005789(endoplasmic reticulum membrane);GO:0005829(cytosol);GO:0005856(c…	NA	NA	NA	dystonin [Source:HGNC Symbol;Acc:HGNC:1090]	0	0.003292	1.1248	0.691444	0	0	0	0	inf	inf	6.29932e-06	0.00111045	up	yes
15235519	15280451	ENST00000263377	20	7169	MSTRG.16689	BRD4	GO:0000083(regulation of transcription involved in G1/S transition of mitotic cell cycle);GO:0000794(condensed nuclear chromosome);GO:0001134(transcription regulator recruiting activity);GO:0002039(p53 binding);GO:0003682(chromatin binding);GO:0005515(protein binding);GO:0005634(nucleus);GO:0005654(nucleoplasm);GO:0005694(chromosome);GO:0005829(cytosol);GO:0006325(chromatin organization);GO:00064…	NA	K11722	NA	bromodomain containing 4 [Source:HGNC Symbol;Acc:HGNC:13575]	0.15228	0.110498	0	3.43368	0	0	0	0	inf	inf	6.3434e-06	0.00111499	up	yes
36636602	36725173	MSTRG.25927.2	4	28142	MSTRG.25927	AC008957	NA	NA	NA	NA	NA	0	3.97743	0	2.65959	0	0	0	0	inf	inf	6.36878e-06	0.00111623	up	yes
73998114	74120160	ENST00000211998	22	5490	MSTRG.4048	VCL	GO:0002009(morphogenesis of an epithelium);GO:0002102(podosome);GO:0002162(dystroglycan binding);GO:0002576(platelet degranulation);GO:0003779(actin binding);GO:0005198(structural molecule activity);GO:0005515(protein binding);GO:0005576(extracellular region);GO:0005623(cell);GO:0005737(cytoplasm);GO:0005829(cytosol);GO:0005856(cytoskeleton);GO:0005886(plasma membrane);GO:0005903(brush border);GO…	04510(Focal adhesion);04520(Adherens junction);04670(Leukocyte transendothelial migration);04810(Regulation of actin cytoskeleton);05100(Bacterial invasion of epithelial cells);05131(Shigellosis);05146(Amoebiasis)	K05700	NA	vinculin [Source:HGNC Symbol;Acc:HGNC:12665]	34.6756	0.120083	0.065514	28.9696	0.088752	0.075277	0.113233	0.103953	167.441	7.3875	6.53502e-06	0.00114173	up	yes
16507438	16514285	MSTRG.347.6	2	464	MSTRG.347	RNU1-1	NA	NA	NA	NA	NA	72.5204	161.531	48.9835	0	0.163794	0	0	0	1727.99	10.7549	6.55184e-06	0.00114173	up	yes
41150871	41196132	MSTRG.21318.9	4	28237	MSTRG.21318	PLAC4	NA	NA	NA	NA	NA	0	9.2713	9.99834	0	0	0	0	4.7e-05	409992	18.6452	6.70687e-06	0.0011654	up	yes
87331668	87345408	ENST00000370542	5	1260	MSTRG.1431	LMO4	GO:0001158(enhancer sequence-specific DNA binding);GO:0001843(neural tube closure);GO:0003281(ventricular septum development);GO:0003700(DNA-binding transcription factor activity);GO:0005515(protein binding);GO:0005667(transcription factor complex);GO:0006366(transcription by RNA polymerase II);GO:0008134(transcription factor binding);GO:0021514(ventral spinal cord interneuron differentiation);GO…	NA	NA	NA	LIM domain only 4 [Source:HGNC Symbol;Acc:HGNC:6644]	14.7414	16.1607	19.9233	19.4828	1.05702	1.3283	0.804311	1.13607	16.2536	4.02269	7.03111e-06	0.00121827	up	yes
81666772	81673899	MSTRG.15374.5	6	2167	MSTRG.15374	CCDC137	NA	NA	NA	NA	NA	3.36655	1.26013	0.135851	0	0	0	0	0	inf	inf	7.19097e-06	0.00124242	up	yes
74654228	74683853	ENST00000611975	13	6007	MSTRG.18590	SEMA4F	GO:0001755(neural crest cell migration);GO:0005515(protein binding);GO:0005615(extracellular space);GO:0005783(endoplasmic reticulum);GO:0005886(plasma membrane);GO:0005887(integral component of plasma membrane);GO:0007267(cell-cell signaling);GO:0007275(multicellular organism development);GO:0007399(nervous system development);GO:0007411(axon guidance);GO:0016020(membrane);GO:0016021(integral co…	04360(Axon guidance)	K06521	NA	ssemaphorin 4F [Source:HGNC Symbol;Acc:HGNC:10734]	0	0	0	0	0.015503	0.008444	0.30642	0.728389	-inf	-inf	7.27747e-06	0.00125381	down	yes
84423528	84466232	MSTRG.18636.1	10	1908	MSTRG.18636	SUCLG1	NA	NA	NA	NA	NA	28.4647	25.3914	25.9025	3.31791	0.251414	0	0	0	330.437	8.36823	7.35822e-06	0.00126414	up	yes
201190825	201228952	ENST00000335211	24	11810	MSTRG.2704	IGFN1	GO:0005515(protein binding);GO:0005634(nucleus);GO:0005737(cytoplasm);GO:0008150(biological_process);GO:0030017(sarcomere);GO:0030018(Z disc)	NA	NA	NA	immunoglobulin-like and fibronectin type III domain containing 1 [Source:HGNC Symbol;Acc:HGNC:24607]	3.07976	2.44448	2.78599	3.3411	0.16809	0.170845	0.160188	0.333492	13.9937	3.8067	7.56194e-06	0.00129548	up	yes
48615330	48619168	ENST00000547897	5	440	MSTRG.17489	RPL18	GO:0000184(nuclear-transcribed mRNA catabolic process, nonsense-mediated decay);GO:0002181(cytoplasmic translation);GO:0003723(RNA binding);GO:0003735(structural constituent of ribosome);GO:0005622(intracellular);GO:0005634(nucleus);GO:0005730(nucleolus);GO:0005737(cytoplasm);GO:0005783(endoplasmic reticulum);GO:0005791(rough endoplasmic reticulum);GO:0005829(cytosol);GO:0005840(ribosome);GO:0005…	03010(Ribosome)	K02883	NA	ribosomal protein L18 [Source:HGNC Symbol;Acc:HGNC:10310]	0	1.42559	4.59061	8.44406	0	0	0	0	inf	inf	7.73591e-06	0.00132156	up	yes
140859807	141133469	ENST00000515673	7	10432	MSTRG.25323	RNF150	GO:0006511(ubiquitin-dependent protein catabolic process);GO:0016020(membrane);GO:0016021(integral component of membrane);GO:0016567(protein ubiquitination);GO:0046872(metal ion binding);GO:0061630(ubiquitin protein ligase activity)	NA	NA	NA	ring finger protein 150 [Source:HGNC Symbol;Acc:HGNC:23138]	7.37824	1.02282	0.031233	7.95758	0.067522	0.079415	0.078662	0.034499	63.0142	5.97761	7.78848e-06	0.00132681	up	yes
75229037	75251528	MSTRG.13028.4	7	3146	MSTRG.13028	BCAR1	NA	NA	NA	NA	NA	0.929207	1.58723	0	0.346068	0	0.002309	0	0	1239.72	10.2758	7.89165e-06	0.00133807	up	yes
128257909	128537821	MSTRG.26731.1	57	9357	MSTRG.26731	FBN2	NA	NA	NA	NA	NA	0	0	0	0	6.55432	11.4348	0	0	-inf	-inf	7.89854e-06	0.00133807	down	yes
68874323	68979239	ENST00000394419	22	3464	MSTRG.9819	ACTN1	GO:0001725(stress fiber);GO:0001726(ruffle);GO:0002576(platelet degranulation);GO:0003725(double-stranded RNA binding);GO:0003779(actin binding);GO:0005178(integrin binding);GO:0005509(calcium ion binding);GO:0005515(protein binding);GO:0005576(extracellular region);GO:0005615(extracellular space);GO:0005737(cytoplasm);GO:0005829(cytosol);GO:0005856(cytoskeleton);GO:0005884(actin filament);GO:000…	04510(Focal adhesion);04520(Adherens junction);04530(Tight junction);04670(Leukocyte transendothelial migration);04810(Regulation of actin cytoskeleton);05146(Amoebiasis);05203(Viral carcinogenesis);05322(Systemic lupus erythematosus)	NA	NA	actinin alpha 1 [Source:HGNC Symbol;Acc:HGNC:163]	0	0	0	0	0	14.6168	40.2045	0	-inf	-inf	8.0049e-06	0.00135232	down	yes
32432787	32538833	MSTRG.8566.20	10	3969	MSTRG.8566	N4BP2L2	NA	NA	NA	NA	NA	0	0.71137	0.575448	0.690529	3e-06	0	0	0	659116	19.3302	8.03679e-06	0.00135394	up	yes
92842160	92877150	ENST00000613047	5	2646	MSTRG.1495	DIPK1A	GO:0005783(endoplasmic reticulum);GO:0005789(endoplasmic reticulum membrane);GO:0016020(membrane);GO:0016021(integral component of membrane)	NA	NA	NA	divergent protein kinase domain 1A [Source:HGNC Symbol;Acc:HGNC:32213]	1.03199	1.23681	1.03578	0	0.000443	0.00195	0.002125	0.000817	619.415	9.27476	8.18746e-06	0.00137552	up	yes
190077	214448	MSTRG.6507.1	16	3505	MSTRG.6507	SLC6A12	NA	NA	NA	NA	NA	0.226588	0.22132	0.073902	0.279575	6.55034	5.25457	4.97925	2.49182	0.0415743	-4.58817	8.36725e-06	0.00140086	down	yes
104137910	104180894	MSTRG.10242.1	15	7715	MSTRG.10242	KIF26A	NA	NA	NA	NA	NA	7.23906	0.411053	3.61539	0.068769	0.050165	0.042649	0.043855	0.050043	60.7046	5.92373	8.38438e-06	0.00140086	up	yes
228208130	228361250	ENST00000284548	81	20432	MSTRG.3112	OBSCN	GO:0000166(nucleotide binding);GO:0004672(protein kinase activity);GO:0004674(protein serine/threonine kinase activity);GO:0005089(Rho guanyl-nucleotide exchange factor activity);GO:0005515(protein binding);GO:0005516(calmodulin binding);GO:0005524(ATP binding);GO:0005546(phosphatidylinositol-4,5-bisphosphate binding);GO:0005547(phosphatidylinositol-3,4,5-trisphosphate binding);GO:0005634(nucleus…	NA	K17531	EC:2.7.11.1	obscurin, cytoskeletal calmodulin and titin-interacting RhoGEF [Source:HGNC Symbol;Acc:HGNC:15719]	0.010893	0.041145	0.050653	0.01496	0	0	0	0	inf	inf	8.5603e-06	0.00142633	up	yes
939275	944259	ENST00000455979	7	1731	MSTRG.34	SAMD11	GO:0003677(DNA binding);GO:0005515(protein binding);GO:0005634(nucleus)	NA	NA	NA	sterile alpha motif domain containing 11 [Source:HGNC Symbol;Acc:HGNC:28706]	0.41241	0.443431	0.892496	0.92387	0.021086	0	0	1.2e-05	126.657	6.98478	8.65804e-06	0.00143868	up	yes
125592819	125621226	MSTRG.6428.3	18	2990	MSTRG.6428	STT3A	NA	NA	NA	NA	NA	0	0	0	0	0	18.2832	33.639	0	-inf	-inf	8.70648e-06	0.00144279	down	yes
8398574	8443300	MSTRG.21098.81	2	852	MSTRG.21098	FP236383	NA	NA	NA	NA	NA	0	0	0	0	0	167.994	0	45.8203	-inf	-inf	8.8661e-06	0.00146524	down	yes
481150	543759	ENST00000645910	14	4290	MSTRG.20191	CSNK2A1	GO:0000166(nucleotide binding);GO:0004672(protein kinase activity);GO:0004674(protein serine/threonine kinase activity);GO:0005515(protein binding);GO:0005524(ATP binding);GO:0005634(nucleus);GO:0005654(nucleoplasm);GO:0005829(cytosol);GO:0005886(plasma membrane);GO:0005956(protein kinase CK2 complex);GO:0006457(protein folding);GO:0006468(protein phosphorylation);GO:0006656(phosphatidylcholine b…	03008(Ribosome biogenesis in eukaryotes);04064(NF-kappa B signaling pathway);04137(Mitophagy - animal);04310(Wnt signaling pathway);04520(Adherens junction);05162(Measles)	K03097	EC:2.7.11.1	casein kinase 2 alpha 1 [Source:HGNC Symbol;Acc:HGNC:2457]	0	0	12.3794	11.9625	0	0	0	0	inf	inf	9.12816e-06	0.00150446	up	yes
4740859	4771373	MSTRG.29288.2	7	10245	MSTRG.29288	FOXK1	NA	NA	NA	NA	NA	0	0	0	0	0	0	8.54217	5.96137	-inf	-inf	9.22726e-06	0.00151669	down	yes
94708549	95081645	ENST00000508509	19	2214	MSTRG.26456	MCTP1	GO:0005509(calcium ion binding);GO:0005768(endosome);GO:0005783(endoplasmic reticulum);GO:0005789(endoplasmic reticulum membrane);GO:0016020(membrane);GO:0016021(integral component of membrane);GO:0019722(calcium-mediated signaling);GO:0030054(cell junction);GO:0030336(negative regulation of cell migration);GO:0030672(synaptic vesicle membrane);GO:0031410(cytoplasmic vesicle);GO:0045202(synapse);…	NA	NA	NA	multiple C2 and transmembrane domain containing 1 [Source:HGNC Symbol;Acc:HGNC:26183]	0.458252	1.49893	0.257951	0.058456	0	0.002829	0.000924	0	605.806	9.24271	9.39252e-06	0.00153969	up	yes
47961138	47976920	ENST00000650216	14	2399	MSTRG.31318	MCM4	GO:0000082(G1/S transition of mitotic cell cycle);GO:0000166(nucleotide binding);GO:0000784(nuclear chromosome, telomeric region);GO:0003677(DNA binding);GO:0003678(DNA helicase activity);GO:0003697(single-stranded DNA binding);GO:0004003(ATP-dependent DNA helicase activity);GO:0004386(helicase activity);GO:0005515(protein binding);GO:0005524(ATP binding);GO:0005634(nucleus);GO:0005654(nucleoplas…	03030(DNA replication);04110(Cell cycle)	K02212	EC:3.6.4.12	minichromosome maintenance complex component 4 [Source:HGNC Symbol;Acc:HGNC:6947]	0	0	0	0	25.2332	31.3332	0	0	-inf	-inf	9.46733e-06	0.00154778	down	yes
58411386	58451501	MSTRG.31366.7	5	4601	MSTRG.31366	UBXN2B	NA	NA	NA	NA	NA	0.528886	0.28088	0	0.520848	0	0	0	0	inf	inf	9.53654e-06	0.00155492	up	yes
47803134	47850192	ENST00000395745	23	3887	MSTRG.22722	DHX30	GO:0000166(nucleotide binding);GO:0002151(G-quadruplex RNA binding);GO:0003676(nucleic acid binding);GO:0003682(chromatin binding);GO:0003723(RNA binding);GO:0003725(double-stranded RNA binding);GO:0004003(ATP-dependent DNA helicase activity);GO:0004004(ATP-dependent RNA helicase activity);GO:0004386(helicase activity);GO:0005515(protein binding);GO:0005524(ATP binding);GO:0005634(nucleus);GO:000…	NA	K13185	EC:3.6.4.13	DExH-box helicase 30 [Source:HGNC Symbol;Acc:HGNC:16716]	0.015768	0.282642	0.23311	0.608514	0	0	0	0.001155	987.042	9.94697	9.74409e-06	0.00158451	up	yes
34398187	34458553	MSTRG.32456.8	7	3644	MSTRG.32456	FAM219A	NA	NA	NA	NA	NA	0.007444	1.60256	1.95567	0.53669	0.008138	0.00848	0.012664	0.014625	93.433	6.54586	1.00677e-05	0.00163277	up	yes
8205942	8437896	MSTRG.21101.7	5	3913	MSTRG.21101	FP671120	NA	NA	NA	NA	NA	18.1997	0	0	84.7282	6.6e-05	0	0	0	1.55951e+06	20.5727	1.01676e-05	0.00164458	up	yes
210187923	210225447	ENST00000233710	11	2515	MSTRG.19850	ACADL	GO:0000062(fatty-acyl-CoA binding);GO:0001659(temperature homeostasis);GO:0003995(acyl-CoA dehydrogenase activity);GO:0004466(long-chain-acyl-CoA dehydrogenase activity);GO:0005739(mitochondrion);GO:0005759(mitochondrial matrix);GO:0006629(lipid metabolic process);GO:0006631(fatty acid metabolic process);GO:0006635(fatty acid beta-oxidation);GO:0016401(palmitoyl-CoA oxidase activity);GO:0016491(o…	00071(Fatty acid degradation);03320(PPAR signaling pathway)	NA	NA	acyl-CoA dehydrogenase long chain [Source:HGNC Symbol;Acc:HGNC:88]	2.54596	3.65126	4.00749	3.17539	0.118529	0.086963	0	0.011416	61.6856	5.94686	1.03078e-05	0.00166284	up	yes
100516386	100577541	MSTRG.32981.10	7	1698	MSTRG.32981	TMEFF1	NA	NA	NA	NA	NA	0.55442	0.805701	1.98861	1.56601	0.06077	0	0	0.012867	66.7428	6.06054	1.07037e-05	0.00172213	up	yes
31535395	31541484	ENST00000419338	6	928	MSTRG.27917	DDX39B	GO:0000166(nucleotide binding);GO:0000245(spliceosomal complex assembly);GO:0000346(transcription export complex);GO:0000398(mRNA splicing, via spliceosome);GO:0001889(liver development);GO:0003676(nucleic acid binding);GO:0003723(RNA binding);GO:0004004(ATP-dependent RNA helicase activity);GO:0004386(helicase activity);GO:0005515(protein binding);GO:0005524(ATP binding);GO:0005634(nucleus);GO:00…	03013(RNA transport);03015(mRNA surveillance pathway);03040(Spliceosome);05164(Influenza A)	K12812	EC:3.6.4.13	DExD-box helicase 39B [Source:HGNC Symbol;Acc:HGNC:13917]	5.34353	0.156106	2.51371	0	0	0	0	0	inf	inf	1.08111e-05	0.00173064	up	yes
27460629	27549906	MSTRG.12323.4	36	6909	MSTRG.12323	GTF3C1	NA	NA	NA	NA	NA	0	0	0	0	4.91369	0	15.3627	0	-inf	-inf	1.08135e-05	0.00173064	down	yes
8214778	8442701	MSTRG.21101.30	4	975	MSTRG.21101	FP671120	NA	NA	NA	NA	NA	290.866	0	7.59364	0	0	0	0	0	inf	inf	1.09475e-05	0.00174749	up	yes
39285337	39486987	MSTRG.823.19	81	16487	MSTRG.823	MACF1	NA	NA	NA	NA	NA	0	0	0	0	1.69706	6.73887	0	0	-inf	-inf	1.10312e-05	0.00175624	down	yes
22113306	22194893	MSTRG.27601.14	3	1069	MSTRG.27601	CASC15	NA	NA	NA	NA	NA	1.70808	1.92728	1.92152	2.06486	0.011181	0.077332	0.108592	0	38.6684	5.27308	1.1112e-05	0.00176448	up	yes
12947995	12987536	ENST00000262124	9	3494	MSTRG.15616	SEH1L	GO:0000775(chromosome, centromeric region);GO:0000776(kinetochore);GO:0000777(condensed chromosome kinetochore);GO:0002534(cytokine production involved in inflammatory response);GO:0005198(structural molecule activity);GO:0005515(protein binding);GO:0005634(nucleus);GO:0005635(nuclear envelope);GO:0005643(nuclear pore);GO:0005694(chromosome);GO:0005764(lysosome);GO:0005765(lysosomal membrane);GO:…	03013(RNA transport);04150(mTOR signaling pathway)	K14299	NA	SEH1 like nucleoporin [Source:HGNC Symbol;Acc:HGNC:30379]	3.01173	5.41041	5.83117	0.327559	0.073291	0.106887	0.176348	0.054717	35.4556	5.14794	1.1184e-05	0.00176693	up	yes
47016689	47163576	MSTRG.22699.4	22	8345	MSTRG.22699	SETD2	NA	NA	NA	NA	NA	0.344913	8.67361	0.305006	0.012321	0.006669	0.015035	0.00352	0.023527	191.501	7.58121	1.11855e-05	0.00176693	up	yes
41282679	41306534	MSTRG.10646.1	3	8624	MSTRG.10646	AC087721	NA	NA	NA	NA	NA	0	0	4.5015	6.08298	0	0	0	0	inf	inf	1.13311e-05	0.00178529	up	yes
8392720	8443798	MSTRG.21098.64	5	1681	MSTRG.21098	FP236383	NA	NA	NA	NA	NA	0	0	0	0	59.6949	17.6601	0	0	-inf	-inf	1.14454e-05	0.00179396	down	yes
20982269	20998972	MSTRG.21615.21	18	4542	MSTRG.21615	AC002470	NA	NA	NA	NA	NA	0	0.025357	0	0.014495	0.575555	0.493909	0.55361	0.505842	0.0187194	-5.73932	1.14666e-05	0.00179396	down	yes
42833399	42841578	ENST00000590720	11	998	MSTRG.14416	PSME3	GO:0000165(MAPK cascade);GO:0000209(protein polyubiquitination);GO:0000502(proteasome complex);GO:0002039(p53 binding);GO:0002223(stimulatory C-type lectin receptor signaling pathway);GO:0002479(antigen processing and presentation of exogenous peptide antigen via MHC class I, TAP-dependent);GO:0005515(protein binding);GO:0005634(nucleus);GO:0005654(nucleoplasm);GO:0005737(cytoplasm);GO:0005829(cy…	03050(Proteasome);04612(Antigen processing and presentation);05160(Hepatitis C)	K06698	NA	proteasome activator subunit 3 [Source:HGNC Symbol;Acc:HGNC:9570]	15.9858	14.152	0.006375	4.3308	0.097848	0.04133	0.000708	1.8e-05	246.418	7.94497	1.14746e-05	0.00179396	up	yes
76369713	76559748	ENST00000547540	20	2583	MSTRG.7725	OSBPL8	GO:0001786(phosphatidylserine binding);GO:0005548(phospholipid transporter activity);GO:0005634(nucleus);GO:0005783(endoplasmic reticulum);GO:0005789(endoplasmic reticulum membrane);GO:0005829(cytosol);GO:0006869(lipid transport);GO:0008289(lipid binding);GO:0010891(negative regulation of sequestering of triglyceride);GO:0015248(sterol transporter activity);GO:0015485(cholesterol binding);GO:0015…	NA	K22285	NA	oxysterol binding protein like 8 [Source:HGNC Symbol;Acc:HGNC:16396]	4.1e-05	7.07351	8.34671	1e-06	0	0	0	0	inf	inf	1.17833e-05	0.00183749	up	yes
89588051	89656067	ENST00000261173	20	6777	MSTRG.7806	ATP2B1	GO:0000166(nucleotide binding);GO:0001772(immunological synapse);GO:0001818(negative regulation of cytokine production);GO:0003056(regulation of vascular smooth muscle contraction);GO:0003407(neural retina development);GO:0005388(calcium-transporting ATPase activity);GO:0005515(protein binding);GO:0005516(calmodulin binding);GO:0005524(ATP binding);GO:0005634(nucleus);GO:0005886(plasma membrane);…	04020(Calcium signaling pathway);04022(cGMP-PKG signaling pathway);04024(cAMP signaling pathway);04261(Adrenergic signaling in cardiomyocytes);04925(Aldosterone synthesis and secretion);04961(Endocrine and other factor-regulated calcium reabsorption);04970(Salivary secretion);04972(Pancreatic secretion);04978(Mineral absorption)	NA	NA	ATPase plasma membrane Ca2+ transporting 1 [Source:HGNC Symbol;Acc:HGNC:814]	0.012735	0.018677	5.97273	5.78246	0.008015	0.006846	0.024893	0.013104	222.986	7.80081	1.192e-05	0.00185406	up	yes
201213096	201228952	ENST00000473483	12	3588	MSTRG.2704	IGFN1	GO:0005515(protein binding);GO:0005634(nucleus);GO:0005737(cytoplasm);GO:0008150(biological_process);GO:0030017(sarcomere);GO:0030018(Z disc)	NA	NA	NA	immunoglobulin-like and fibronectin type III domain containing 1 [Source:HGNC Symbol;Acc:HGNC:24607]	0	0.609856	0.382595	0.630805	0	0	0	0	inf	inf	1.19778e-05	0.00185829	up	yes
136250340	136330169	ENST00000251654	15	1799	MSTRG.23477	PCCB	GO:0000166(nucleotide binding);GO:0003989(acetyl-CoA carboxylase activity);GO:0004658(propionyl-CoA carboxylase activity);GO:0005515(protein binding);GO:0005524(ATP binding);GO:0005739(mitochondrion);GO:0005759(mitochondrial matrix);GO:0005829(cytosol);GO:0006633(fatty acid biosynthetic process);GO:0006768(biotin metabolic process);GO:0009317(acetyl-CoA carboxylase complex);GO:0016874(ligase acti…	00280(Valine, leucine and isoleucine degradation);00630(Glyoxylate and dicarboxylate metabolism);00640(Propanoate metabolism)	NA	NA	propionyl-CoA carboxylase subunit beta [Source:HGNC Symbol;Acc:HGNC:8654]	0.359433	2.39171	37.1775	34.1557	0.599935	0.050399	0.061129	0.12517	88.5505	6.46843	1.2114e-05	0.00187465	up	yes
169637247	170083382	ENST00000256935	52	6097	ENSG00000134516	DOCK2	GO:0001766(membrane raft polarization);GO:0001768(establishment of T cell polarity);GO:0001771(immunological synapse formation);GO:0002277(myeloid dendritic cell activation involved in immune response);GO:0005085(guanyl-nucleotide exchange factor activity);GO:0005096(GTPase activator activity);GO:0005515(protein binding);GO:0005576(extracellular region);GO:0005737(cytoplasm);GO:0005829(cytosol);G…	04062(Chemokine signaling pathway);04666(Fc gamma R-mediated phagocytosis)	K12367	NA	dedicator of cytokinesis 2 [Source:HGNC Symbol;Acc:HGNC:2988]	0.293786	0.391272	0.19077	0.364144	0.011521	0.006951	0.029818	0.003782	23.8126	4.57366	1.22477e-05	0.00189052	up	yes
69220332	69267552	ENST00000354624	18	3653	MSTRG.3946	HKDC1	GO:0000166(nucleotide binding);GO:0001678(cellular glucose homeostasis);GO:0004340(glucokinase activity);GO:0004396(hexokinase activity);GO:0005524(ATP binding);GO:0005536(glucose binding);GO:0005739(mitochondrion);GO:0005829(cytosol);GO:0005975(carbohydrate metabolic process);GO:0006096(glycolytic process);GO:0008865(fructokinase activity);GO:0016301(kinase activity);GO:0016310(phosphorylation);…	00010(Glycolysis / Gluconeogenesis);00051(Fructose and mannose metabolism);00052(Galactose metabolism);00500(Starch and sucrose metabolism);00520(Amino sugar and nucleotide sugar metabolism);00524(Neomycin, kanamycin and gentamicin biosynthesis);04066(HIF-1 signaling pathway);04910(Insulin signaling pathway);04930(Type II diabetes mellitus);04973(Carbohydrate digestion and absorption);05230(Centr…	K00844	EC:2.7.1.1	hexokinase domain containing 1 [Source:HGNC Symbol;Acc:HGNC:23302]	9.95185	9.66567	10.8768	9.86027	0.882068	0.82774	0.833466	0.799313	12.0729	3.5937	1.23822e-05	0.00190645	up	yes
16646195	16706481	ENST00000405202	11	1689	MSTRG.29395	BZW2	GO:0005515(protein binding);GO:0005737(cytoplasm);GO:0007275(multicellular organism development);GO:0007399(nervous system development);GO:0016020(membrane);GO:0030154(cell differentiation);GO:0045296(cadherin binding)	NA	NA	NA	basic leucine zipper and W2 domains 2 [Source:HGNC Symbol;Acc:HGNC:18808]	27.327	0	0	27.3871	0	0	0	0	inf	inf	1.25417e-05	0.00192613	up	yes
43591450	43622842	ENST00000414879	25	4836	MSTRG.892	PTPRF	GO:0004721(phosphoprotein phosphatase activity);GO:0004725(protein tyrosine phosphatase activity);GO:0005001(transmembrane receptor protein tyrosine phosphatase activity);GO:0005515(protein binding);GO:0005886(plasma membrane);GO:0005887(integral component of plasma membrane);GO:0006470(protein dephosphorylation);GO:0007155(cell adhesion);GO:0007185(transmembrane receptor protein tyrosine phospha…	04514(Cell adhesion molecules (CAMs));04520(Adherens junction);04910(Insulin signaling pathway);04931(Insulin resistance)	K05695	EC:3.1.3.48	protein tyrosine phosphatase, receptor type F [Source:HGNC Symbol;Acc:HGNC:9670]	0.001942	0	0	0.000524	0.002707	0	8.284	7.70463	0.000154208	-12.6628	1.26216e-05	0.00193187	down	yes
57989044	58007246	MSTRG.14833.4	6	2985	MSTRG.14833	AC015813	NA	NA	NA	NA	NA	0	0.851521	0.356152	0.804472	0	0	0	0	inf	inf	1.26426e-05	0.00193187	up	yes
178725165	178920103	ENST00000367635	20	5834	MSTRG.2536	RALGPS2	GO:0005085(guanyl-nucleotide exchange factor activity);GO:0005622(intracellular);GO:0005737(cytoplasm);GO:0005886(plasma membrane);GO:0007264(small GTPase mediated signal transduction);GO:0016020(membrane);GO:0032485(regulation of Ral protein signal transduction)	NA	NA	NA	Ral GEF with PH domain and SH3 binding motif 2 [Source:HGNC Symbol;Acc:HGNC:30279]	0	0	0.017303	0.015943	0.300761	0.402953	0.954304	1.04682	0.0122913	-6.34622	1.27212e-05	0.00193901	down	yes
63189287	63195397	MSTRG.3882.8	6	977	MSTRG.3882	JMJD1C	NA	NA	NA	NA	NA	2.53546	0.04493	3.49476	2.92853	0.040558	0.039503	0.006718	0.063207	60.0302	5.90762	1.2767e-05	0.00193927	up	yes
110124392	110163065	ENST00000546374	10	1171	MSTRG.8056	IFT81	GO:0005515(protein binding);GO:0005813(centrosome);GO:0005929(cilium);GO:0007283(spermatogenesis);GO:0008589(regulation of smoothened signaling pathway);GO:0015631(tubulin binding);GO:0030030(cell projection organization);GO:0030992(intraciliary transport particle B);GO:0031514(motile cilium);GO:0035735(intraciliary transport involved in cilium assembly);GO:0036064(ciliary basal body);GO:0042073(…	NA	K19677	NA	intraflagellar transport 81 [Source:HGNC Symbol;Acc:HGNC:14313]	0	0	0	0	2.19024	0	1.36784	1.77561	-inf	-inf	1.28208e-05	0.00193927	down	yes
39410266	39486987	MSTRG.823.30	42	12068	MSTRG.823	MACF1	NA	NA	NA	NA	NA	4.14886	0	0	3.37522	0	0	0	0	inf	inf	1.28267e-05	0.00193927	up	yes
32031300	32299122	ENST00000542859	61	13200	MSTRG.8559	FRY	GO:0000902(cell morphogenesis);GO:0000922(spindle pole);GO:0004857(enzyme inhibitor activity);GO:0005737(cytoplasm);GO:0005815(microtubule organizing center);GO:0005856(cytoskeleton);GO:0005938(cell cortex);GO:0031175(neuron projection development);GO:0043086(negative regulation of catalytic activity);GO:1904428(negative regulation of tubulin deacetylation)	NA	NA	NA	FRY microtubule binding protein [Source:HGNC Symbol;Acc:HGNC:20367]	3.19498	2.54052	1.73818	1.83327	0.275978	0.094272	0.140049	0.099055	15.2735	3.93296	1.28692e-05	0.00193927	up	yes
61752611	61753768	MSTRG.20881.1	1	1158	MSTRG.20881	CDH4	NA	NA	NA	NA	NA	1.48215	1.30949	1.13688	1.94207	0.072962	0.064367	0.059935	0.129069	17.9896	4.16909	1.28823e-05	0.00193927	up	yes
133019486	133021174	MSTRG.33400.6	2	991	MSTRG.33400	EEF1A1P5	NA	NA	NA	NA	NA	41.127	61.0728	0	0	0	0	0	0	inf	inf	1.29161e-05	0.00193955	up	yes
39410266	39486987	MSTRG.823.29	44	12197	MSTRG.823	MACF1	NA	NA	NA	NA	NA	2.89054	0	0	4.52323	0	0	0	0	inf	inf	1.31298e-05	0.00196679	up	yes
37696373	37719188	ENST00000395835	5	4003	MSTRG.17131	ZNF607	GO:0000981(DNA-binding transcription factor activity, RNA polymerase II-specific);GO:0003676(nucleic acid binding);GO:0003677(DNA binding);GO:0005515(protein binding);GO:0005622(intracellular);GO:0005634(nucleus);GO:0006355(regulation of transcription, DNA-templated);GO:0006357(regulation of transcription by RNA polymerase II);GO:0046872(metal ion binding)	05168(Herpes simplex virus 1 infection)	K09228	NA	zinc finger protein 607 [Source:HGNC Symbol;Acc:HGNC:28192]	1.942	0	0.422264	0.030487	0	0	0	0	inf	inf	1.32351e-05	0.00197768	up	yes
22052489	22091480	ENST00000594947	4	3874	MSTRG.16893	ZNF257	GO:0000981(DNA-binding transcription factor activity, RNA polymerase II-specific);GO:0003676(nucleic acid binding);GO:0003677(DNA binding);GO:0005622(intracellular);GO:0005634(nucleus);GO:0006355(regulation of transcription, DNA-templated);GO:0006357(regulation of transcription by RNA polymerase II);GO:0008270(zinc ion binding);GO:0046872(metal ion binding)	05168(Herpes simplex virus 1 infection)	K09228	NA	zinc finger protein 257 [Source:HGNC Symbol;Acc:HGNC:13498]	0	0	0	0	0.014653	0.27414	0.444694	0.105623	-inf	-inf	1.33939e-05	0.00199652	down	yes
151050973	151059649	ENST00000540998	6	3181	MSTRG.2070	CDC42SE1	GO:0005095(GTPase inhibitor activity);GO:0005198(structural molecule activity);GO:0005737(cytoplasm);GO:0005856(cytoskeleton);GO:0005886(plasma membrane);GO:0006909(phagocytosis);GO:0007165(signal transduction);GO:0008360(regulation of cell shape);GO:0016020(membrane);GO:0017048(Rho GTPase binding);GO:0034260(negative regulation of GTPase activity);GO:0035023(regulation of Rho protein signal tran…	NA	NA	NA	CDC42 small effector 1 [Source:HGNC Symbol;Acc:HGNC:17719]	6.58607	7.60736	0.009173	0.110437	0.00074	0.00182	0.000678	0.0347	377.274	8.55947	1.35957e-05	0.00202163	up	yes
136029139	136063665	ENST00000507018	17	2469	MSTRG.26839	TGFBI	GO:0001525(angiogenesis);GO:0002062(chondrocyte differentiation);GO:0005178(integrin binding);GO:0005201(extracellular matrix structural constituent);GO:0005515(protein binding);GO:0005518(collagen binding);GO:0005576(extracellular region);GO:0005604(basement membrane);GO:0005615(extracellular space);GO:0005802(trans-Golgi network);GO:0005886(plasma membrane);GO:0007155(cell adhesion);GO:0007162(…	NA	K19519	NA	transforming growth factor beta induced [Source:HGNC Symbol;Acc:HGNC:11771]	7.55779	0	31.6659	0	0	0	0	0	inf	inf	1.37499e-05	0.00203145	up	yes
104769392	104793700	MSTRG.10268.12	14	3043	MSTRG.10268	AKT1	NA	NA	NA	NA	NA	0	0	0	0	0	11.8709	0	22.5384	-inf	-inf	1.3753e-05	0.00203145	down	yes
1578445	1605462	MSTRG.16201.11	8	1145	MSTRG.16201	MBD3	NA	NA	NA	NA	NA	0	0	0	0	0	7.80747	0.027121	14.7674	-inf	-inf	1.37619e-05	0.00203145	down	yes
40692439	41072415	ENST00000551295	24	5667	ENSG00000018236	CNTN1	GO:0005515(protein binding);GO:0005886(plasma membrane);GO:0007155(cell adhesion);GO:0007219(Notch signaling pathway);GO:0007399(nervous system development);GO:0010628(positive regulation of gene expression);GO:0010765(positive regulation of sodium ion transport);GO:0010976(positive regulation of neuron projection development);GO:0016020(membrane);GO:0021549(cerebellum development);GO:0030246(car…	04514(Cell adhesion molecules (CAMs))	NA	NA	contactin 1 [Source:HGNC Symbol;Acc:HGNC:2171]	0.465832	0.387428	0.639133	0.562179	0.008148	0.022434	0.016171	0.04069	23.4961	4.55435	1.38467e-05	0.00203901	up	yes
81745730	81752774	ENST00000369756	3	5537	MSTRG.28499	TENT5A	GO:0003723(RNA binding);GO:0005515(protein binding);GO:0009617(response to bacterium);GO:0016740(transferase activity);GO:0016779(nucleotidyltransferase activity);GO:1990817(RNA adenylyltransferase activity)	NA	K23033	EC:2.7.7.-	terminal nucleotidyltransferase 5A [Source:HGNC Symbol;Acc:HGNC:18345]	4e-06	0.004546	0	0.00563	0.003899	0.130201	1.13787	1.06511	0.00435585	-7.84283	1.41245e-05	0.0020704	down	yes
34525113	34531677	MSTRG.10470.30	11	4077	MSTRG.10470	GOLGA8B	NA	NA	NA	NA	NA	0.000353	0	0.000266	0.007689	7.15385	0	0.614752	0.858752	0.000962984	-10.0202	1.41279e-05	0.0020704	down	yes
70480571	70523539	ENST00000530314	17	3488	MSTRG.12931	COG4	GO:0000139(Golgi membrane);GO:0005515(protein binding);GO:0005794(Golgi apparatus);GO:0006888(endoplasmic reticulum to Golgi vesicle-mediated transport);GO:0006890(retrograde vesicle-mediated transport, Golgi to endoplasmic reticulum);GO:0007030(Golgi organization);GO:0015031(protein transport);GO:0016020(membrane);GO:0017119(Golgi transport complex);GO:0032588(trans-Golgi network membrane);GO:00…	NA	K20291	NA	component of oligomeric golgi complex 4 [Source:HGNC Symbol;Acc:HGNC:18620]	0.077564	0.042804	0	0	1.6198	2.75916	8.5036	2.31826	0.00791852	-6.98055	1.42123e-05	0.00207777	down	yes
41790069	41895231	MSTRG.28145.4	8	8666	MSTRG.28145	USP49	NA	NA	NA	NA	NA	0.001752	0	0	0	0.123561	0	1.58714	2.05432	0.000465337	-11.0694	1.42693e-05	0.00208109	down	yes
97852131	97869813	ENST00000454046	12	1947	MSTRG.30144	ASNS	GO:0000166(nucleotide binding);GO:0001889(liver development);GO:0004066(asparagine synthase (glutamine-hydrolyzing) activity);GO:0005515(protein binding);GO:0005524(ATP binding);GO:0005829(cytosol);GO:0006520(cellular amino acid metabolic process);GO:0006529(asparagine biosynthetic process);GO:0006541(glutamine metabolic process);GO:0008652(cellular amino acid biosynthetic process);GO:0009416(res…	00250(Alanine, aspartate and glutamate metabolism)	NA	NA	asparagine synthetase (glutamine-hydrolyzing) [Source:HGNC Symbol;Acc:HGNC:753]	24.5165	23.3596	0	0	0	0	0	0	inf	inf	1.44187e-05	0.00209785	up	yes
121292852	121308633	ENST00000392789	5	2258	MSTRG.6371	SC5D	GO:0000248(C-5 sterol desaturase activity);GO:0005506(iron ion binding);GO:0005783(endoplasmic reticulum);GO:0005789(endoplasmic reticulum membrane);GO:0006629(lipid metabolic process);GO:0006694(steroid biosynthetic process);GO:0008202(steroid metabolic process);GO:0008610(lipid biosynthetic process);GO:0016020(membrane);GO:0016021(integral component of membrane);GO:0016126(sterol biosynthetic p…	00100(Steroid biosynthesis)	K00227	EC:1.14.19.20	sterol-C5-desaturase [Source:HGNC Symbol;Acc:HGNC:10547]	0.053308	15.4615	0.043474	15.1981	0.042076	0.028999	0.010246	0.05664	222.935	7.80048	1.45388e-05	0.00210669	up	yes
49743417	49755736	ENST00000549130	4	446	MSTRG.7231	TMBIM6	GO:0005515(protein binding);GO:0005634(nucleus);GO:0005737(cytoplasm);GO:0005783(endoplasmic reticulum);GO:0005789(endoplasmic reticulum membrane);GO:0005887(integral component of plasma membrane);GO:0006914(autophagy);GO:0006915(apoptotic process);GO:0006986(response to unfolded protein);GO:0010523(negative regulation of calcium ion transport into cytosol);GO:0016020(membrane);GO:0016021(integra…	NA	K21889	NA	transmembrane BAX inhibitor motif containing 6 [Source:HGNC Symbol;Acc:HGNC:11723]	0	0	0	0	3.83907	5.73297	0	3.49582	-inf	-inf	1.45487e-05	0.00210669	down	yes
57620046	57654133	ENST00000561988	6	1016	MSTRG.12709	ADGRG1	GO:0001525(angiogenesis);GO:0004888(transmembrane signaling receptor activity);GO:0004930(G protein-coupled receptor activity);GO:0005518(collagen binding);GO:0005576(extracellular region);GO:0005886(plasma membrane);GO:0005887(integral component of plasma membrane);GO:0007155(cell adhesion);GO:0007165(signal transduction);GO:0007166(cell surface receptor signaling pathway);GO:0007186(G protein-c…	NA	K08450	NA	adhesion G protein-coupled receptor G1 [Source:HGNC Symbol;Acc:HGNC:4512]	0	0.938045	3.22707	1.66388	0	0	0	0	inf	inf	1.46453e-05	0.00211564	up	yes
127573069	127590707	ENST00000296210	9	1725	MSTRG.23354	TPRA1	GO:0004930(G protein-coupled receptor activity);GO:0005515(protein binding);GO:0006629(lipid metabolic process);GO:0007186(G protein-coupled receptor signaling pathway);GO:0007568(aging);GO:0016020(membrane);GO:0016021(integral component of membrane);GO:0040016(embryonic cleavage);GO:1901991(negative regulation of mitotic cell cycle phase transition)	NA	K22988	NA	transmembrane protein adipocyte associated 1 [Source:HGNC Symbol;Acc:HGNC:30413]	0	1.33751	0.446191	1.57019	0	0	0	0	inf	inf	1.57461e-05	0.00226927	up	yes
39410266	39486987	MSTRG.823.28	43	12086	MSTRG.823	MACF1	NA	NA	NA	NA	NA	3.33628	0	0	2.95832	0	0	0	0	inf	inf	1.63104e-05	0.00234503	up	yes
142023160	142846290	ENST00000513000	27	8831	ENSG00000109452	INPP4B	GO:0005515(protein binding);GO:0005737(cytoplasm);GO:0005829(cytosol);GO:0006661(phosphatidylinositol biosynthetic process);GO:0007165(signal transduction);GO:0016020(membrane);GO:0016021(integral component of membrane);GO:0016311(dephosphorylation);GO:0016316(phosphatidylinositol-3,4-bisphosphate 4-phosphatase activity);GO:0016787(hydrolase activity);GO:0034597(phosphatidylinositol-4,5-bisphosph…	00562(Inositol phosphate metabolism);04070(Phosphatidylinositol signaling system)	K01109	EC:3.1.3.66	inositol polyphosphate-4-phosphatase type II B [Source:HGNC Symbol;Acc:HGNC:6075]	0.642569	0.305185	0.180218	0.61461	0.020915	0	0.010237	0.005298	47.8075	5.57916	1.69549e-05	0.00243194	up	yes
160274540	160407882	MSTRG.19332.14	14	1785	MSTRG.19332	RBMS1	NA	NA	NA	NA	NA	0	0	0	0	0.603464	1.23462	0	1.3176	-inf	-inf	1.74387e-05	0.00249545	down	yes
91940916	92041781	ENST00000493453	19	6020	MSTRG.30110	AKAP9	GO:0000086(G2/M transition of mitotic cell cycle);GO:0003677(DNA binding);GO:0005102(signaling receptor binding);GO:0005515(protein binding);GO:0005737(cytoplasm);GO:0005794(Golgi apparatus);GO:0005795(Golgi stack);GO:0005801(cis-Golgi network);GO:0005813(centrosome);GO:0005815(microtubule organizing center);GO:0005829(cytosol);GO:0005856(cytoskeleton);GO:0007020(microtubule nucleation);GO:000716…	NA	K16551	NA	A-kinase anchoring protein 9 [Source:HGNC Symbol;Acc:HGNC:379]	0	0.00613	0	0	0.069213	1.18859	0.016068	0.727865	0.00306234	-8.35115	1.74879e-05	0.00249662	down	yes
201213096	201228952	MSTRG.2704.7	13	3784	MSTRG.2704	IGFN1	NA	NA	NA	NA	NA	0	0.581554	0.356249	0.428367	0	0	0	0	inf	inf	1.76279e-05	0.00251072	up	yes
41182115	41317602	ENST00000559234	4	6296	MSTRG.20660	ZHX3	GO:0000122(negative regulation of transcription by RNA polymerase II);GO:0000977(RNA polymerase II regulatory region sequence-specific DNA binding);GO:0000981(DNA-binding transcription factor activity, RNA polymerase II-specific);GO:0003676(nucleic acid binding);GO:0003677(DNA binding);GO:0003700(DNA-binding transcription factor activity);GO:0003714(transcription corepressor activity);GO:0005515(…	NA	NA	NA	zinc fingers and homeoboxes 3 [Source:HGNC Symbol;Acc:HGNC:15935]	0	0.003937	0	0	0.36231	0.717398	2.01207	0	0.00127338	-9.61712	1.78918e-05	0.00254235	down	yes
42231224	42238248	ENST00000541702	3	4994	MSTRG.7073	YAF2	GO:0003713(transcription coactivator activity);GO:0003714(transcription corepressor activity);GO:0005515(protein binding);GO:0005634(nucleus);GO:0005654(nucleoplasm);GO:0005829(cytosol);GO:0045892(negative regulation of transcription, DNA-templated);GO:0045893(positive regulation of transcription, DNA-templated);GO:0046872(metal ion binding);GO:0070317(negative regulation of G0 to G1 transition);…	NA	K11468	NA	YY1 associated factor 2 [Source:HGNC Symbol;Acc:HGNC:17363]	0	1.20241	0.42754	0.010459	0	0	0	0	inf	inf	1.81872e-05	0.00257831	up	yes
48306690	48439360	ENST00000374189	12	5796	MSTRG.3799	MAPK8	GO:0000165(MAPK cascade);GO:0000166(nucleotide binding);GO:0004672(protein kinase activity);GO:0004674(protein serine/threonine kinase activity);GO:0004705(JUN kinase activity);GO:0004707(MAP kinase activity);GO:0005515(protein binding);GO:0005524(ATP binding);GO:0005634(nucleus);GO:0005654(nucleoplasm);GO:0005737(cytoplasm);GO:0005739(mitochondrion);GO:0005829(cytosol);GO:0006468(protein phospho…	01522(Endocrine resistance);04010(MAPK signaling pathway);04012(ErbB signaling pathway);04014(Ras signaling pathway);04024(cAMP signaling pathway);04068(FoxO signaling pathway);04071(Sphingolipid signaling pathway);04137(Mitophagy - animal);04140(Autophagy - animal);04141(Protein processing in endoplasmic reticulum);04210(Apoptosis);04215(Apoptosis - multiple species);04217(Necroptosis);04310(Wnt…	NA	NA	mitogen-activated protein kinase 8 [Source:HGNC Symbol;Acc:HGNC:6881]	0.545444	0.272148	0.500592	0.165198	0.008237	0.017858	0.026854	0.018988	20.6206	4.36601	1.82497e-05	0.00258114	up	yes
161122025	161130837	ENST00000368005	5	1256	MSTRG.2341	DEDD	GO:0003677(DNA binding);GO:0005515(protein binding);GO:0005634(nucleus);GO:0005730(nucleolus);GO:0005737(cytoplasm);GO:0006915(apoptotic process);GO:0007283(spermatogenesis);GO:0008625(extrinsic apoptotic signaling pathway via death domain receptors);GO:0042177(negative regulation of protein catabolic process);GO:0042981(regulation of apoptotic process);GO:0046697(decidualization);GO:1901837(nega…	NA	NA	NA	death effector domain containing [Source:HGNC Symbol;Acc:HGNC:2755]	0.096046	0.104433	0.176176	0.144316	2.33438	5.69505	2.32703	2.54541	0.0403795	-4.63023	1.83451e-05	0.00258862	down	yes
71683985	71768386	ENST00000542935	24	5372	MSTRG.32674	CEMIP2	GO:0001525(angiogenesis);GO:0004415(hyalurononglucosaminidase activity);GO:0005509(calcium ion binding);GO:0005886(plasma membrane);GO:0005887(integral component of plasma membrane);GO:0007275(multicellular organism development);GO:0008152(metabolic process);GO:0016020(membrane);GO:0016021(integral component of membrane);GO:0016787(hydrolase activity);GO:0016798(hydrolase activity, acting on glyc…	NA	K22144	EC:3.2.1.35	cell migration inducing hyaluronidase 2 [Source:HGNC Symbol;Acc:HGNC:11869]	0	0	6.27724	5.75833	0	0	0	0	inf	inf	1.83966e-05	0.00258988	up	yes
7240574	7242358	ENST00000570856	3	583	MSTRG.13525	GABARAP	GO:0000045(autophagosome assembly);GO:0000139(Golgi membrane);GO:0000226(microtubule cytoskeleton organization);GO:0000421(autophagosome membrane);GO:0000422(autophagy of mitochondrion);GO:0005515(protein binding);GO:0005737(cytoplasm);GO:0005764(lysosome);GO:0005776(autophagosome);GO:0005790(smooth endoplasmic reticulum);GO:0005794(Golgi apparatus);GO:0005829(cytosol);GO:0005856(cytoskeleton);GO…	04068(FoxO signaling pathway);04136(Autophagy - other);04137(Mitophagy - animal);04140(Autophagy - animal);04371(Apelin signaling pathway);04621(NOD-like receptor signaling pathway);04727(GABAergic synapse);05167(Kaposi sarcoma-associated herpesvirus infection)	K08341	NA	GABA type A receptor-associated protein [Source:HGNC Symbol;Acc:HGNC:4067]	0.86175	0.749139	0.761995	0	78.6098	86.433	0.714976	59.5289	0.0105327	-6.56898	1.85308e-05	0.00260274	down	yes
42456561	42473385	MSTRG.863.5	2	1054	MSTRG.863	CCDC30	NA	NA	NA	NA	NA	0	0	0	0	0.72973	1.57958	0.234837	0.088628	-inf	-inf	1.87041e-05	0.00262104	down	yes
22216591	22455740	MSTRG.32344.1	3	5644	MSTRG.32344	DMRTA1	NA	NA	NA	NA	NA	1.49892	1.46133	1.30234	1.64037	0.046772	0.044533	0.127605	0.080284	19.7295	4.30229	1.88072e-05	0.00262941	up	yes
28905250	28951518	ENST00000332830	15	4506	MSTRG.13973	PHF12	GO:0000122(negative regulation of transcription by RNA polymerase II);GO:0001222(transcription corepressor binding);GO:0003714(transcription corepressor activity);GO:0005515(protein binding);GO:0005634(nucleus);GO:0005654(nucleoplasm);GO:0016580(Sin3 complex);GO:0017053(transcriptional repressor complex);GO:0035091(phosphatidylinositol binding);GO:0045892(negative regulation of transcription, DNA…	NA	NA	NA	PHD finger protein 12 [Source:HGNC Symbol;Acc:HGNC:20816]	0.780211	0.034683	0.457562	0.068065	0.000313	0.007607	0.000332	0.002587	123.676	6.95042	1.88725e-05	0.00263249	up	yes
45566869	45570049	ENST00000497973	5	667	MSTRG.972	AKR1A1	GO:0004032(alditol:NADP+ 1-oxidoreductase activity);GO:0004033(aldo-keto reductase (NADP) activity);GO:0005515(protein binding);GO:0005615(extracellular space);GO:0005737(cytoplasm);GO:0005829(cytosol);GO:0005886(plasma membrane);GO:0006006(glucose metabolic process);GO:0006081(cellular aldehyde metabolic process);GO:0008106(alcohol dehydrogenase (NADP+) activity);GO:0009055(electron transfer act…	00010(Glycolysis / Gluconeogenesis);00040(Pentose and glucuronate interconversions);00561(Glycerolipid metabolism)	K00002	EC:1.1.1.2	aldo-keto reductase family 1 member A1 [Source:HGNC Symbol;Acc:HGNC:380]	0.151598	7.6e-05	12.2325	4.48303	0.000226	0.002461	0.000518	0.000158	5015.52	12.2922	1.92659e-05	0.00268122	up	yes
75845747	75855308	ENST00000591831	8	1406	MSTRG.15164	WBP2	GO:0000790(nuclear chromatin);GO:0000978(RNA polymerase II proximal promoter sequence-specific DNA binding);GO:0003713(transcription coactivator activity);GO:0005515(protein binding);GO:0005634(nucleus);GO:0005737(cytoplasm);GO:0030331(estrogen receptor binding);GO:0031490(chromatin DNA binding);GO:0032570(response to progesterone);GO:0033148(positive regulation of intracellular estrogen receptor…	NA	K22524	NA	WW domain binding protein 2 [Source:HGNC Symbol;Acc:HGNC:12738]	0	0	0	0	0.780365	0.702574	2.91067	0	-inf	-inf	1.96014e-05	0.00270979	down	yes
238560479	238561699	MSTRG.20105.1	2	1070	MSTRG.20105	.	NA	NA	NA	NA	NA	1.23025	0.699167	0.969126	1.5416	0	0	0	0.044359	100.096	6.64523	1.96035e-05	0.00270979	up	yes
33503931	33542842	ENST00000381831	22	3490	MSTRG.21261	GART	GO:0000166(nucleotide binding);GO:0003360(brainstem development);GO:0003824(catalytic activity);GO:0004637(phosphoribosylamine-glycine ligase activity);GO:0004641(phosphoribosylformylglycinamidine cyclo-ligase activity);GO:0004644(phosphoribosylglycinamide formyltransferase activity);GO:0005524(ATP binding);GO:0005829(cytosol);GO:0006164(purine nucleotide biosynthetic process);GO:0006189('de novo…	00230(Purine metabolism);00670(One carbon pool by folate);01523(Antifolate resistance)	NA	NA	phosphoribosylglycinamide formyltransferase, phosphoribosylglycinamide synthetase, phosphoribosylaminoimidazole synthetase [Source:HGNC Symbol;Acc:HGNC:4163]	3.55729	3.99352	0.176947	0	0	0.00595	0	0	1298.78	10.3429	1.96048e-05	0.00270979	up	yes
37517418	37527931	ENST00000414542	3	2205	MSTRG.20620	BLCAP	GO:0005515(protein binding);GO:0006915(apoptotic process);GO:0007049(cell cycle);GO:0016020(membrane);GO:0016021(integral component of membrane);GO:0030262(apoptotic nuclear changes)	NA	NA	NA	BLCAP, apoptosis inducing factor [Source:HGNC Symbol;Acc:HGNC:1055]	0.000301	0	0.022876	0	15.6658	0.515101	0	11.9717	0.000823262	-10.2464	1.97099e-05	0.00271814	down	yes
39580371	39599466	MSTRG.10583.1	23	7955	MSTRG.10583	THBS1	NA	NA	NA	NA	NA	0	2.3075	6.78927	0	0	0	0	0	inf	inf	1.99226e-05	0.0027344	up	yes
49487608	49492305	ENST00000488946	3	2312	MSTRG.17531	RPL13A	GO:0000184(nuclear-transcribed mRNA catabolic process, nonsense-mediated decay);GO:0003723(RNA binding);GO:0003729(mRNA binding);GO:0003735(structural constituent of ribosome);GO:0005634(nucleus);GO:0005730(nucleolus);GO:0005737(cytoplasm);GO:0005829(cytosol);GO:0005840(ribosome);GO:0005925(focal adhesion);GO:0006412(translation);GO:0006413(translational initiation);GO:0006417(regulation of trans…	03010(Ribosome)	K02872	NA	ribosomal protein L13a [Source:HGNC Symbol;Acc:HGNC:10304]	14.3329	24.8099	5.488	36.9388	0.555823	1.39425	2.13452	0.918423	16.3041	4.02716	1.99564e-05	0.0027344	up	yes
23689598	23796148	ENST00000585600	13	1815	MSTRG.15683	LAMA3	GO:0005102(signaling receptor binding);GO:0005198(structural molecule activity);GO:0005201(extracellular matrix structural constituent);GO:0005576(extracellular region);GO:0005604(basement membrane);GO:0005610(laminin-5 complex);GO:0005783(endoplasmic reticulum);GO:0007155(cell adhesion);GO:0008544(epidermis development);GO:0030155(regulation of cell adhesion);GO:0030198(extracellular matrix orga…	04151(PI3K-Akt signaling pathway);04510(Focal adhesion);04512(ECM-receptor interaction);05145(Toxoplasmosis);05146(Amoebiasis);05165(Human papillomavirus infection);05200(Pathways in cancer);05222(Small cell lung cancer)	NA	NA	laminin subunit alpha 3 [Source:HGNC Symbol;Acc:HGNC:6483]	0	0	0	0	1.69099	0.019483	0.017585	1.30608	-inf	-inf	1.99628e-05	0.0027344	down	yes
16740516	16896143	MSTRG.366.14	2	273	MSTRG.366	CROCCP4	NA	NA	NA	NA	NA	0	83.9425	167.218	0	0	0	0	0	inf	inf	2.02479e-05	0.00276723	up	yes
122371039	122392544	MSTRG.33155.7	12	2068	MSTRG.33155	PTGS1	NA	NA	NA	NA	NA	0	0.11224	0	0.020177	11.1939	2.0641	2.50079	1.26609	0.00777787	-7.00641	2.07005e-05	0.00282274	down	yes
136720885	136724050	ENST00000371691	3	2410	MSTRG.33482	DIPK1B	GO:0005515(protein binding);GO:0005783(endoplasmic reticulum);GO:0005789(endoplasmic reticulum membrane);GO:0016020(membrane);GO:0016021(integral component of membrane)	NA	NA	NA	divergent protein kinase domain 1B [Source:HGNC Symbol;Acc:HGNC:28290]	0.508481	0.779308	0	0.82099	0	0	0	0	inf	inf	2.10791e-05	0.00286793	up	yes
136061190	136063803	ENST00000504411	3	1033	MSTRG.26839	TGFBI	GO:0001525(angiogenesis);GO:0002062(chondrocyte differentiation);GO:0005178(integrin binding);GO:0005201(extracellular matrix structural constituent);GO:0005515(protein binding);GO:0005518(collagen binding);GO:0005576(extracellular region);GO:0005604(basement membrane);GO:0005615(extracellular space);GO:0005802(trans-Golgi network);GO:0005886(plasma membrane);GO:0007155(cell adhesion);GO:0007162(…	NA	K19519	NA	transforming growth factor beta induced [Source:HGNC Symbol;Acc:HGNC:11771]	8.48425	3.0036	12.7935	1.59351	0.263817	0.182897	0.127018	0.007391	44.5256	5.47656	2.14308e-05	0.00290928	up	yes
20021107	20065264	ENST00000450019	9	1689	MSTRG.21563	TANGO2	GO:0005794(Golgi apparatus);GO:0007030(Golgi organization);GO:0009306(protein secretion)	NA	NA	NA	transport and golgi organization 2 homolog [Source:HGNC Symbol;Acc:HGNC:25439]	3.01715	3.99132	0.004438	3.23036	0.01196	0	0.031715	0.015105	174.265	7.44514	2.15848e-05	0.00292366	up	yes
18244836	18245968	ENST00000581858	4	644	MSTRG.13771	FLII	GO:0003779(actin binding);GO:0005515(protein binding);GO:0005634(nucleus);GO:0005654(nucleoplasm);GO:0005737(cytoplasm);GO:0005815(microtubule organizing center);GO:0005829(cytosol);GO:0005856(cytoskeleton);GO:0005903(brush border);GO:0005925(focal adhesion);GO:0007275(multicellular organism development);GO:0030036(actin cytoskeleton organization);GO:0030054(cell junction);GO:0051014(actin filame…	NA	NA	NA	FLII, actin remodeling protein [Source:HGNC Symbol;Acc:HGNC:3750]	0	0	41.9519	45.6978	0	0	0	0	inf	inf	2.24269e-05	0.00302605	up	yes
46104406	46128169	ENST00000589554	7	616	MSTRG.15845	HAUS1	GO:0000086(G2/M transition of mitotic cell cycle);GO:0000922(spindle pole);GO:0003674(molecular_function);GO:0005515(protein binding);GO:0005737(cytoplasm);GO:0005813(centrosome);GO:0005815(microtubule organizing center);GO:0005819(spindle);GO:0005829(cytosol);GO:0005856(cytoskeleton);GO:0005874(microtubule);GO:0007049(cell cycle);GO:0007098(centrosome cycle);GO:0010389(regulation of G2/M transit…	NA	K16584	NA	HAUS augmin like complex subunit 1 [Source:HGNC Symbol;Acc:HGNC:25174]	0	0	0	0	3.01454	4.05725	0	1.53429	-inf	-inf	2.24403e-05	0.00302605	down	yes
104138076	104180894	MSTRG.10242.3	15	7019	MSTRG.10242	KIF26A	NA	NA	NA	NA	NA	0	0	0	0	0	3.85704	0	6.5549	-inf	-inf	2.25426e-05	0.00303313	down	yes
108008956	108107761	MSTRG.6182.3	18	5936	MSTRG.6182	CUL5	NA	NA	NA	NA	NA	0	0	0	0	0	5.97415	5.90637	0	-inf	-inf	2.28443e-05	0.0030625	down	yes
42458397	42469660	ENST00000640840	5	3735	MSTRG.7084	PRICKLE1	GO:0001843(neural tube closure);GO:0005515(protein binding);GO:0005634(nucleus);GO:0005737(cytoplasm);GO:0005829(cytosol);GO:0006606(protein import into nucleus);GO:0008270(zinc ion binding);GO:0016020(membrane);GO:0031398(positive regulation of protein ubiquitination);GO:0031965(nuclear membrane);GO:0032436(positive regulation of proteasomal ubiquitin-dependent protein catabolic process);GO:0035…	04310(Wnt signaling pathway)	K04511	NA	prickle planar cell polarity protein 1 [Source:HGNC Symbol;Acc:HGNC:17019]	0.161328	1.06309	1.03873	1.05136	0	0.02818	0	0	117.619	6.87798	2.28617e-05	0.0030625	up	yes
75601927	75679867	MSTRG.28451.6	18	3766	MSTRG.28451	SENP6	NA	NA	NA	NA	NA	0.011248	0.069121	0.008668	0.011964	1.24689	1.24059	1.539	0.156261	0.024147	-5.37201	2.30109e-05	0.00307573	down	yes
1661478	1692644	ENST00000617444	10	6283	MSTRG.126	SLC35E2B	GO:0001835(blastocyst hatching);GO:0005794(Golgi apparatus);GO:0015165(pyrimidine nucleotide-sugar transmembrane transporter activity);GO:0015297(antiporter activity);GO:0016020(membrane);GO:0016021(integral component of membrane);GO:0022857(transmembrane transporter activity);GO:0055085(transmembrane transport);GO:0090481(pyrimidine nucleotide-sugar transmembrane transport)	NA	K15284	NA	solute carrier family 35 member E2B [Source:HGNC Symbol;Acc:HGNC:33941]	1.28083	4.97446	0.000631	0.000358	0.000754	0.002205	0.000582	0.000896	1410.02	10.4615	2.30701e-05	0.00307687	up	yes
42782795	42831365	MSTRG.3727.6	22	4281	MSTRG.3727	BMS1	NA	NA	NA	NA	NA	0	0	0	0	0	7.30552	0	9.16367	-inf	-inf	2.31542e-05	0.00308134	down	yes
128957223	129054883	ENST00000471166	22	3019	MSTRG.30527	TNPO3	GO:0005515(protein binding);GO:0005634(nucleus);GO:0005737(cytoplasm);GO:0006606(protein import into nucleus);GO:0008565(protein transporter activity);GO:0015031(protein transport);GO:0038023(signaling receptor activity);GO:0042802(identical protein binding);GO:0043231(intracellular membrane-bounded organelle)	NA	K15436	NA	transportin 3 [Source:HGNC Symbol;Acc:HGNC:17103]	0.070454	0.099071	10.6515	8.52239	0.023053	0.035595	0.046807	0.079201	104.754	6.71085	2.36377e-05	0.00313077	up	yes
48904312	48911646	ENST00000635589	3	1424	MSTRG.33933	SLC35A2	GO:0000139(Golgi membrane);GO:0005459(UDP-galactose transmembrane transporter activity);GO:0005634(nucleus);GO:0005783(endoplasmic reticulum);GO:0005794(Golgi apparatus);GO:0006012(galactose metabolic process);GO:0008643(carbohydrate transport);GO:0015165(pyrimidine nucleotide-sugar transmembrane transporter activity);GO:0016020(membrane);GO:0016021(integral component of membrane);GO:0030173(inte…	NA	K15272	NA	solute carrier family 35 member A2 [Source:HGNC Symbol;Acc:HGNC:11022]	0	0	0	0	0	0.51972	1.13649	2.38145	-inf	-inf	2.36656e-05	0.00313077	down	yes
90955382	90962342	MSTRG.11590.7	8	1898	MSTRG.11590	RCCD1	NA	NA	NA	NA	NA	0.280042	1.13087	1.42664	0	0	0	0	0	inf	inf	2.36801e-05	0.00313077	up	yes
127298730	127388465	ENST00000409947	17	10992	MSTRG.19036	MAP3K2	GO:0000165(MAPK cascade);GO:0000166(nucleotide binding);GO:0000186(activation of MAPKK activity);GO:0000187(activation of MAPK activity);GO:0004672(protein kinase activity);GO:0004674(protein serine/threonine kinase activity);GO:0004709(MAP kinase kinase kinase activity);GO:0005515(protein binding);GO:0005524(ATP binding);GO:0005634(nucleus);GO:0005654(nucleoplasm);GO:0005737(cytoplasm);GO:000582…	04010(MAPK signaling pathway);04540(Gap junction);04912(GnRH signaling pathway)	K04420	EC:2.7.11.25	mitogen-activated protein kinase kinase kinase 2 [Source:HGNC Symbol;Acc:HGNC:6854]	0.022082	4.32425	3.921	0.015129	0.013319	0.014543	0.030393	0.010492	120.477	6.91262	2.39559e-05	0.00316036	up	yes
848608	874902	ENST00000433212	17	3474	MSTRG.29248	SUN1	GO:0001503(ossification);GO:0005515(protein binding);GO:0005521(lamin binding);GO:0005634(nucleus);GO:0005635(nuclear envelope);GO:0005637(nuclear inner membrane);GO:0005639(integral component of nuclear inner membrane);GO:0005737(cytoplasm);GO:0006998(nuclear envelope organization);GO:0007129(synapsis);GO:0007283(spermatogenesis);GO:0009612(response to mechanical stimulus);GO:0016020(membrane);G…	NA	K19347	NA	Sad1 and UNC84 domain containing 1 [Source:HGNC Symbol;Acc:HGNC:18587]	0	0	0	0	0	10.6319	0	8.94622	-inf	-inf	2.40729e-05	0.00316892	down	yes
47468006	47480424	MSTRG.3760.8	12	2026	MSTRG.3760	ANXA8	NA	NA	NA	NA	NA	0.089682	3.41562	0.544276	5.40481	0.054469	0.019033	0	0.005307	119.966	6.90648	2.47334e-05	0.00322892	up	yes
23945375	23978497	ENST00000383773	9	3129	MSTRG.22465	NR1D2	GO:0000122(negative regulation of transcription by RNA polymerase II);GO:0000976(transcription regulatory region sequence-specific DNA binding);GO:0000977(RNA polymerase II regulatory region sequence-specific DNA binding);GO:0000978(RNA polymerase II proximal promoter sequence-specific DNA binding);GO:0000980(RNA polymerase II distal enhancer sequence-specific DNA binding);GO:0000981(DNA-binding …	NA	K08531	NA	nuclear receptor subfamily 1 group D member 2 [Source:HGNC Symbol;Acc:HGNC:7963]	0	9.45798	0	9.51602	0	0	0	0	inf	inf	2.47334e-05	0.00322892	up	yes
184314568	184325299	ENST00000413967	17	2808	MSTRG.23994	EIF4G1	GO:0000184(nuclear-transcribed mRNA catabolic process, nonsense-mediated decay);GO:0001662(behavioral fear response);GO:0002191(cap-dependent translational initiation);GO:0003723(RNA binding);GO:0003729(mRNA binding);GO:0003743(translation initiation factor activity);GO:0005515(protein binding);GO:0005524(ATP binding);GO:0005634(nucleus);GO:0005737(cytoplasm);GO:0005829(cytosol);GO:0005844(polyso…	03013(RNA transport);05416(Viral myocarditis)	K03260	NA	eukaryotic translation initiation factor 4 gamma 1 [Source:HGNC Symbol;Acc:HGNC:3296]	0	0	0	0	0.430065	1.4959	0	0.225599	-inf	-inf	2.47674e-05	0.00322892	down	yes
100428817	100434117	ENST00000414441	5	2261	MSTRG.30206	MEPCE	GO:0000122(negative regulation of transcription by RNA polymerase II);GO:0001510(RNA methylation);GO:0003723(RNA binding);GO:0008168(methyltransferase activity);GO:0008171(O-methyltransferase activity);GO:0008173(RNA methyltransferase activity);GO:0008757(S-adenosylmethionine-dependent methyltransferase activity);GO:0016073(snRNA metabolic process);GO:0016740(transferase activity);GO:0017069(snRN…	NA	K15190	EC:2.1.1.-	methylphosphate capping enzyme [Source:HGNC Symbol;Acc:HGNC:20247]	0	0	0	0	15.7482	0	13.6329	0	-inf	-inf	2.47749e-05	0.00322892	down	yes
22933841	23026486	ENST00000399725	18	3260	MSTRG.15666	RBBP8	GO:0000014(single-stranded DNA endodeoxyribonuclease activity);GO:0000082(G1/S transition of mitotic cell cycle);GO:0000403(Y-form DNA binding);GO:0000406(double-strand/single-strand DNA junction binding);GO:0000724(double-strand break repair via homologous recombination);GO:0000729(DNA double-strand break processing);GO:0001103(RNA polymerase II repressing transcription factor binding);GO:000183…	03440(Homologous recombination)	K20773	EC:3.1.-.-	RB binding protein 8, endonuclease [Source:HGNC Symbol;Acc:HGNC:9891]	0	0	0	0	8.26987	11.6822	0	0	-inf	-inf	2.48405e-05	0.00322892	down	yes
70907739	71110153	MSTRG.9851.8	33	6822	MSTRG.9851	PCNX1	NA	NA	NA	NA	NA	0	0	0	0	0	0.860663	14.5611	0	-inf	-inf	2.48472e-05	0.00322892	down	yes
219555763	219559431	ENST00000456147	5	1571	MSTRG.19938	OBSL1	GO:0000226(microtubule cytoskeleton organization);GO:0005515(protein binding);GO:0005737(cytoplasm);GO:0005794(Golgi apparatus);GO:0005813(centrosome);GO:0005815(microtubule organizing center);GO:0005829(cytosol);GO:0005856(cytoskeleton);GO:0005865(striated muscle thin filament);GO:0006936(muscle contraction);GO:0007010(cytoskeleton organization);GO:0007030(Golgi organization);GO:0007088(regulati…	NA	K19574	NA	obscurin like 1 [Source:HGNC Symbol;Acc:HGNC:29092]	0	0	0	0	0.604748	0	1.32589	1.40069	-inf	-inf	2.49343e-05	0.00323333	down	yes
72578815	72714181	ENST00000339490	31	6121	MSTRG.34098	PHKA1	GO:0003824(catalytic activity);GO:0004689(phosphorylase kinase activity);GO:0005516(calmodulin binding);GO:0005829(cytosol);GO:0005886(plasma membrane);GO:0005964(phosphorylase kinase complex);GO:0005975(carbohydrate metabolic process);GO:0005977(glycogen metabolic process);GO:0005980(glycogen catabolic process);GO:0006091(generation of precursor metabolites and energy);GO:0006468(protein phospho…	04020(Calcium signaling pathway);04910(Insulin signaling pathway);04922(Glucagon signaling pathway)	K07190	NA	phosphorylase kinase regulatory subunit alpha 1 [Source:HGNC Symbol;Acc:HGNC:8925]	0	0	4.07717	4.07753	0	0	0	0	inf	inf	2.61288e-05	0.00337501	up	yes
107249493	107498055	ENST00000297450	9	4353	MSTRG.31790	ANGPT1	GO:0000165(MAPK cascade);GO:0001525(angiogenesis);GO:0001701(in utero embryonic development);GO:0001933(negative regulation of protein phosphorylation);GO:0002040(sprouting angiogenesis);GO:0002092(positive regulation of receptor internalization);GO:0002740(negative regulation of cytokine secretion involved in immune response);GO:0005102(signaling receptor binding);GO:0005576(extracellular region…	04010(MAPK signaling pathway);04014(Ras signaling pathway);04015(Rap1 signaling pathway);04066(HIF-1 signaling pathway);04151(PI3K-Akt signaling pathway);05323(Rheumatoid arthritis)	NA	NA	angiopoietin 1 [Source:HGNC Symbol;Acc:HGNC:484]	1e-06	0	1.26339	2.7867	0	0	0	0	inf	inf	2.61379e-05	0.00337501	up	yes
104138399	104180894	MSTRG.10242.4	15	7183	MSTRG.10242	KIF26A	NA	NA	NA	NA	NA	2.53371	6.39489	0	0	0	0	0	0	inf	inf	2.66634e-05	0.00343457	up	yes
35703559	35727531	MSTRG.32499.4	41	6542	MSTRG.32499	TLN1	NA	NA	NA	NA	NA	0	0	0	0	0.152191	0.000134	0.161162	0.213105	-inf	-inf	2.67121e-05	0.00343457	down	yes
50266516	50318135	ENST00000394697	26	6213	MSTRG.12609	ADCY7	GO:0000166(nucleotide binding);GO:0002819(regulation of adaptive immune response);GO:0003091(renal water homeostasis);GO:0004016(adenylate cyclase activity);GO:0005524(ATP binding);GO:0005886(plasma membrane);GO:0005887(integral component of plasma membrane);GO:0006171(cAMP biosynthetic process);GO:0007186(G protein-coupled receptor signaling pathway);GO:0007189(adenylate cyclase-activating G pro…	00230(Purine metabolism);01522(Endocrine resistance);04015(Rap1 signaling pathway);04020(Calcium signaling pathway);04022(cGMP-PKG signaling pathway);04024(cAMP signaling pathway);04062(Chemokine signaling pathway);04072(Phospholipase D signaling pathway);04114(Oocyte meiosis);04211(Longevity regulating pathway);04213(Longevity regulating pathway - multiple species);04261(Adrenergic signaling in …	NA	NA	adenylate cyclase 7 [Source:HGNC Symbol;Acc:HGNC:238]	0	0.000728	0.013579	0	1.44691	0.814543	0.087276	0.060994	0.0059372	-7.396	2.72397e-05	0.00349502	down	yes
15638539	15681619	MSTRG.24385.9	6	1655	MSTRG.24385	FBXL5	NA	NA	NA	NA	NA	0.012166	0.011027	0	0	0.002123	0.547076	2.73531	2.61004	0.00393466	-7.98955	2.79558e-05	0.00357935	down	yes
65499056	65504463	MSTRG.5556.9	3	4841	MSTRG.5556	MALAT1	NA	NA	NA	NA	NA	0	0	0	0	33.6033	0.319589	0	0	-inf	-inf	2.80666e-05	0.0035847	down	yes
218568580	218594526	ENST00000627282	9	1621	MSTRG.19918	CNOT9	GO:0000289(nuclear-transcribed mRNA poly(A) tail shortening);GO:0000932(P-body);GO:0005154(epidermal growth factor receptor binding);GO:0005515(protein binding);GO:0005634(nucleus);GO:0005737(cytoplasm);GO:0005829(cytosol);GO:0006402(mRNA catabolic process);GO:0006417(regulation of translation);GO:0006977(DNA damage response, signal transduction by p53 class mediator resulting in cell cycle arres…	03018(RNA degradation)	NA	NA	CCR4-NOT transcription complex subunit 9 [Source:HGNC Symbol;Acc:HGNC:10445]	0.018979	0.090121	0.016145	0	4.65292	0.653604	0.354009	5.19178	0.0115409	-6.43711	2.81281e-05	0.0035847	down	yes
36890439	36951714	ENST00000642246	17	4508	MSTRG.20614	SAMHD1	GO:0000166(nucleotide binding);GO:0000724(double-strand break repair via homologous recombination);GO:0002376(immune system process);GO:0003676(nucleic acid binding);GO:0003697(single-stranded DNA binding);GO:0003723(RNA binding);GO:0003824(catalytic activity);GO:0004540(ribonuclease activity);GO:0005515(protein binding);GO:0005525(GTP binding);GO:0005634(nucleus);GO:0005654(nucleoplasm);GO:00056…	05170(Human immunodeficiency virus 1 infection)	K22544	EC:3.1.5.-	SAM and HD domain containing deoxynucleoside triphosphate triphosphohydrolase 1 [Source:HGNC Symbol;Acc:HGNC:15925]	0	0	0	0	0.003612	0	1.27725	1.16044	-inf	-inf	2.81745e-05	0.0035847	down	yes
41359604	41697483	MSTRG.24562.3	27	3651	MSTRG.24562	LIMCH1	NA	NA	NA	NA	NA	8.30744	0	0	5.91566	0	0	0	0	inf	inf	2.84271e-05	0.0036093	up	yes
50590069	50792969	ENST00000644769	18	5431	MSTRG.29753	GRB10	GO:0005070(SH3/SH2 adaptor activity);GO:0005158(insulin receptor binding);GO:0005515(protein binding);GO:0005737(cytoplasm);GO:0005829(cytosol);GO:0005886(plasma membrane);GO:0007165(signal transduction);GO:0007411(axon guidance);GO:0009967(positive regulation of signal transduction);GO:0030178(negative regulation of Wnt signaling pathway);GO:0030949(positive regulation of vascular endothelial gr…	04150(mTOR signaling pathway)	K20064	NA	growth factor receptor bound protein 10 [Source:HGNC Symbol;Acc:HGNC:4564]	0.108797	3.54977	0.27063	0.329069	0.001664	0.007547	0.034692	0.012763	75.1467	6.23164	2.86486e-05	0.00362984	up	yes
2766052	2785744	MSTRG.27391.4	7	2030	MSTRG.27391	WRNIP1	NA	NA	NA	NA	NA	12.341	0	0	12.6148	0	0	0	0	inf	inf	2.88166e-05	0.00364354	up	yes
1444936	1475084	ENST00000448525	24	4151	MSTRG.11771	CLCN7	GO:0000166(nucleotide binding);GO:0005247(voltage-gated chloride channel activity);GO:0005254(chloride channel activity);GO:0005515(protein binding);GO:0005524(ATP binding);GO:0005654(nucleoplasm);GO:0005764(lysosome);GO:0005765(lysosomal membrane);GO:0006811(ion transport);GO:0006821(chloride transport);GO:0009268(response to pH);GO:0015297(antiporter activity);GO:0016020(membrane);GO:0016021(in…	NA	NA	NA	chloride voltage-gated channel 7 [Source:HGNC Symbol;Acc:HGNC:2025]	0	3.13971	10.5658	0	0	0	0	0	inf	inf	2.88812e-05	0.00364412	up	yes
25174802	25602220	ENST00000650135	12	6910	MSTRG.3563	GPR158	GO:0004930(G protein-coupled receptor activity);GO:0005886(plasma membrane);GO:0007165(signal transduction);GO:0007186(G protein-coupled receptor signaling pathway);GO:0016020(membrane);GO:0016021(integral component of membrane);GO:0072659(protein localization to plasma membrane)	NA	K08469	NA	G protein-coupled receptor 158 [Source:HGNC Symbol;Acc:HGNC:23689]	0	0.183006	0.204832	0.255533	0	0	0	0	inf	inf	2.92075e-05	0.00367766	up	yes
3024061	3027697	MSTRG.11904.8	14	1226	MSTRG.11904	THOC6	NA	NA	NA	NA	NA	0	17.1372	0	26.4606	0	0	0	0	inf	inf	2.94236e-05	0.00369722	up	yes
119685791	119877288	ENST00000261833	47	8578	MSTRG.8203	CIT	GO:0000086(G2/M transition of mitotic cell cycle);GO:0000166(nucleotide binding);GO:0000278(mitotic cell cycle);GO:0000281(mitotic cytokinesis);GO:0001889(liver development);GO:0004672(protein kinase activity);GO:0004674(protein serine/threonine kinase activity);GO:0005515(protein binding);GO:0005524(ATP binding);GO:0005634(nucleus);GO:0005737(cytoplasm);GO:0005829(cytosol);GO:0005886(plasma memb…	NA	K16308	EC:2.7.11.1	citron rho-interacting serine/threonine kinase [Source:HGNC Symbol;Acc:HGNC:1985]	0	0	0	0	0	0	2.60286	4.57435	-inf	-inf	2.98017e-05	0.00373701	down	yes
191068	214120	ENST00000536824	15	2101	MSTRG.6507	SLC6A12	GO:0003333(amino acid transmembrane transport);GO:0005328(neurotransmitter:sodium symporter activity);GO:0005332(gamma-aminobutyric acid:sodium symporter activity);GO:0005515(protein binding);GO:0005886(plasma membrane);GO:0005887(integral component of plasma membrane);GO:0006836(neurotransmitter transport);GO:0006865(amino acid transport);GO:0015171(amino acid transmembrane transporter activity)…	04721(Synaptic vesicle cycle);04727(GABAergic synapse)	K05045	NA	solute carrier family 6 member 12 [Source:HGNC Symbol;Acc:HGNC:11045]	0	0	0	0	0.400464	1.33633	0	0.643874	-inf	-inf	2.99897e-05	0.00375285	down	yes
64844096	65067749	MSTRG.1234.4	17	2594	MSTRG.1234	JAK1	NA	NA	NA	NA	NA	0	0	0	0	1.41039	2.85858	0	0.006835	-inf	-inf	3.01727e-05	0.0037625	down	yes
32099174	32110926	ENST00000513490	3	4883	MSTRG.25843	PDZD2	GO:0005515(protein binding);GO:0005576(extracellular region);GO:0005634(nucleus);GO:0005737(cytoplasm);GO:0005783(endoplasmic reticulum);GO:0005911(cell-cell junction);GO:0007155(cell adhesion)	NA	NA	NA	PDZ domain containing 2 [Source:HGNC Symbol;Acc:HGNC:18486]	0	0	0	0	0.454972	0.177656	0	0.363937	-inf	-inf	3.01906e-05	0.0037625	down	yes
149701104	149705716	ENST00000651957	2	2306	MSTRG.1980	LINC00869	NA	NA	NA	NA	long intergenic non-protein coding RNA 869 [Source:HGNC Symbol;Acc:HGNC:29050]	0.799985	0.065452	0.803795	0.952296	0.032207	0.009123	0.006188	0.003821	51.0631	5.67421	3.05981e-05	0.00380549	up	yes
78215293	78417779	MSTRG.5930.1	11	6157	MSTRG.5930	GAB2	NA	NA	NA	NA	NA	0.009579	0.017554	7.43191	6.8327	0.03529	0.022098	0.004051	0.013119	191.686	7.5826	3.06612e-05	0.00380555	up	yes
3658038	3717513	ENST00000538171	17	2052	MSTRG.11935	TRAP1	GO:0000166(nucleotide binding);GO:0003723(RNA binding);GO:0005164(tumor necrosis factor receptor binding);GO:0005515(protein binding);GO:0005524(ATP binding);GO:0005654(nucleoplasm);GO:0005739(mitochondrion);GO:0005743(mitochondrial inner membrane);GO:0005758(mitochondrial intermembrane space);GO:0005759(mitochondrial matrix);GO:0006457(protein folding);GO:0009386(translational attenuation);GO:00…	NA	K09488	NA	TNF receptor associated protein 1 [Source:HGNC Symbol;Acc:HGNC:16264]	0	0	0	0	13.0231	0	14.2936	0	-inf	-inf	3.11399e-05	0.00385378	down	yes
152766137	152769664	MSTRG.34560.3	3	1965	MSTRG.34560	MAGEA6	NA	NA	NA	NA	NA	4.71783	0	23.5095	0	0	0	0	0	inf	inf	3.1216e-05	0.00385378	up	yes
47823461	47829673	ENST00000290208	5	2013	MSTRG.14616	MRPL10	GO:0003723(RNA binding);GO:0003735(structural constituent of ribosome);GO:0005515(protein binding);GO:0005622(intracellular);GO:0005654(nucleoplasm);GO:0005739(mitochondrion);GO:0005743(mitochondrial inner membrane);GO:0005762(mitochondrial large ribosomal subunit);GO:0005840(ribosome);GO:0006412(translation);GO:0015934(large ribosomal subunit);GO:0042254(ribosome biogenesis);GO:0070125(mitochond…	03010(Ribosome)	K02864	NA	mitochondrial ribosomal protein L10 [Source:HGNC Symbol;Acc:HGNC:14055]	22.8799	0.216549	24.7067	0.113959	0.142021	0.173472	0.067884	0.180726	84.9438	6.40844	3.12398e-05	0.00385378	up	yes
96352773	96389912	ENST00000646818	10	2715	MSTRG.6083	CCDC82	NA	NA	NA	NA	coiled-coil domain containing 82 [Source:HGNC Symbol;Acc:HGNC:26282]	0.395349	0.52236	0.221742	0.003551	0	0	0	0	inf	inf	3.15541e-05	0.00388467	up	yes
237692339	237764961	ENST00000392000	11	3365	MSTRG.20095	LRRFIP1	GO:0000122(negative regulation of transcription by RNA polymerase II);GO:0000978(RNA polymerase II proximal promoter sequence-specific DNA binding);GO:0000981(DNA-binding transcription factor activity, RNA polymerase II-specific);GO:0001227(DNA-binding transcription repressor activity, RNA polymerase II-specific);GO:0003677(DNA binding);GO:0003725(double-stranded RNA binding);GO:0005515(protein b…	NA	NA	NA	LRR binding FLII interacting protein 1 [Source:HGNC Symbol;Acc:HGNC:6702]	0	0	0	0	0	7.63438	0	8.89998	-inf	-inf	3.16378e-05	0.0038871	down	yes
200812356	200822243	ENST00000452790	12	1473	MSTRG.19726	BZW1	GO:0003723(RNA binding);GO:0005515(protein binding);GO:0005737(cytoplasm);GO:0016020(membrane);GO:0045296(cadherin binding)	NA	NA	NA	basic leucine zipper and W2 domains 1 [Source:HGNC Symbol;Acc:HGNC:18380]	0.06826	0	0.063916	0.040383	0.146231	3.80438	1.92852	6.32606	0.0141382	-6.14426	3.1739e-05	0.00389167	down	yes
50094944	50113146	ENST00000490289	3	628	MSTRG.20781	UBE2V1	GO:0000151(ubiquitin ligase complex);GO:0000187(activation of MAPK activity);GO:0000209(protein polyubiquitination);GO:0005515(protein binding);GO:0005634(nucleus);GO:0005654(nucleoplasm);GO:0005737(cytoplasm);GO:0005829(cytosol);GO:0006282(regulation of DNA repair);GO:0006301(postreplication repair);GO:0006355(regulation of transcription, DNA-templated);GO:0007254(JNK cascade);GO:0030154(cell di…	NA	K10704	NA	ubiquitin conjugating enzyme E2 V1 [Source:HGNC Symbol;Acc:HGNC:12494]	0	0	0	0	2.45713	0	2.49741	2.47614	-inf	-inf	3.21071e-05	0.00392889	down	yes
925731	944574	ENST00000342066	14	2557	MSTRG.34	SAMD11	GO:0003677(DNA binding);GO:0005515(protein binding);GO:0005634(nucleus)	NA	NA	NA	sterile alpha motif domain containing 11 [Source:HGNC Symbol;Acc:HGNC:28706]	11.2848	9.03384	0	0	0	0	0	0	inf	inf	3.25349e-05	0.00396861	up	yes
35292398	35317347	ENST00000553809	7	879	MSTRG.9384	PSMA6	GO:0000165(MAPK cascade);GO:0000209(protein polyubiquitination);GO:0000502(proteasome complex);GO:0000932(P-body);GO:0002223(stimulatory C-type lectin receptor signaling pathway);GO:0002479(antigen processing and presentation of exogenous peptide antigen via MHC class I, TAP-dependent);GO:0003723(RNA binding);GO:0004175(endopeptidase activity);GO:0004298(threonine-type endopeptidase activity);GO:…	03050(Proteasome)	K02730	EC:3.4.25.1	proteasome subunit alpha 6 [Source:HGNC Symbol;Acc:HGNC:9535]	27.448	0	23.9825	0	0	0	0	0	inf	inf	3.25622e-05	0.00396861	up	yes
143381575	143391109	ENST00000354434	8	2050	MSTRG.30700	ZYX	GO:0001725(stress fiber);GO:0003723(RNA binding);GO:0005515(protein binding);GO:0005634(nucleus);GO:0005737(cytoplasm);GO:0005829(cytosol);GO:0005856(cytoskeleton);GO:0005913(cell-cell adherens junction);GO:0005925(focal adhesion);GO:0007155(cell adhesion);GO:0007160(cell-matrix adhesion);GO:0007179(transforming growth factor beta receptor signaling pathway);GO:0007229(integrin-mediated signaling…	04510(Focal adhesion)	K06273	NA	zyxin [Source:HGNC Symbol;Acc:HGNC:13200]	31.2945	0	2.03741	0	0	0	0	0	inf	inf	3.29003e-05	0.0040018	up	yes
56977722	57030988	MSTRG.24730.1	25	3786	MSTRG.24730	POLR2B	NA	NA	NA	NA	NA	0	0	0	0	16.4836	0	2.03033	0	-inf	-inf	3.30761e-05	0.00401514	down	yes
63969925	63989374	ENST00000397985	7	3477	MSTRG.16032	SERPINB8	GO:0004867(serine-type endopeptidase inhibitor activity);GO:0005515(protein binding);GO:0005615(extracellular space);GO:0005737(cytoplasm);GO:0005829(cytosol);GO:0010466(negative regulation of peptidase activity);GO:0010951(negative regulation of endopeptidase activity);GO:0030414(peptidase inhibitor activity);GO:0062023(collagen-containing extracellular matrix);GO:0070062(extracellular exosome);…	NA	K13965	NA	serpin family B member 8 [Source:HGNC Symbol;Acc:HGNC:8952]	0	0	0	0	3.91247	0.000258	0	1.66421	-inf	-inf	3.31836e-05	0.00402017	down	yes
63630520	63749449	MSTRG.11027.14	60	10770	MSTRG.11027	HERC1	NA	NA	NA	NA	NA	0	0	0	0	0	0	2.9866	2.12718	-inf	-inf	3.35459e-05	0.00405599	down	yes
14498139	14510204	MSTRG.25762.28	6	2852	MSTRG.25762	TRIO	NA	NA	NA	NA	NA	0	17.8983	2.67139	0	0	0	0	0	inf	inf	3.379e-05	0.00407739	up	yes
28606688	28615229	ENST00000587961	4	4453	MSTRG.16965	AC079466	NA	NA	NA	NA	novel transcript	0.005932	2.60046	0.00047	1.8799	0.001974	0.003184	0.000827	0.000524	689.317	9.42902	3.41159e-05	0.00410857	up	yes
51365228	51421374	ENST00000497989	15	3022	MSTRG.8760	INTS6	GO:0004888(transmembrane signaling receptor activity);GO:0005515(protein binding);GO:0005634(nucleus);GO:0005654(nucleoplasm);GO:0015629(actin cytoskeleton);GO:0016180(snRNA processing);GO:0032039(integrator complex);GO:0034472(snRNA 3'-end processing);GO:0042795(snRNA transcription by RNA polymerase II)	NA	K13143	NA	integrator complex subunit 6 [Source:HGNC Symbol;Acc:HGNC:14879]	0	0	0	0	0.359512	0.002586	0.150539	0.672206	-inf	-inf	3.48886e-05	0.00418763	down	yes
69121293	69255180	MSTRG.32653.20	25	4755	MSTRG.32653	AL358113	NA	NA	NA	NA	NA	0	0	0	0	5.73283	0	5.04565	0	-inf	-inf	3.497e-05	0.00418763	down	yes
187021856	187078553	ENST00000448044	7	4302	ENSG00000073849	ST6GAL1	GO:0000139(Golgi membrane);GO:0003835(beta-galactoside alpha-2,6-sialyltransferase activity);GO:0005515(protein binding);GO:0005576(extracellular region);GO:0005794(Golgi apparatus);GO:0006054(N-acetylneuraminate metabolic process);GO:0006486(protein glycosylation);GO:0006959(humoral immune response);GO:0008373(sialyltransferase activity);GO:0016020(membrane);GO:0016021(integral component of memb…	00510(N-Glycan biosynthesis);00514(Other types of O-glycan biosynthesis)	NA	NA	ST6 beta-galactoside alpha-2,6-sialyltransferase 1 [Source:HGNC Symbol;Acc:HGNC:10860]	0	0	0	0	0.220095	0	0.444524	0.427247	-inf	-inf	3.499e-05	0.00418763	down	yes
52020803	52034303	MSTRG.24660.2	6	4175	MSTRG.24660	SGCB	NA	NA	NA	NA	NA	0.005645	0	0.262801	1.64641	0	0	0	0	inf	inf	3.50479e-05	0.00418763	up	yes
161685174	161746752	MSTRG.23755.1	1	61579	MSTRG.23755	.	NA	NA	NA	NA	NA	0.150105	0.15797	0.093756	0.151567	1.37271	0.912965	1.89087	1.90714	0.0909644	-3.45855	3.52596e-05	0.00420468	down	yes
37317911	37364446	ENST00000544914	6	2854	MSTRG.17116	HKR1	GO:0000981(DNA-binding transcription factor activity, RNA polymerase II-specific);GO:0003676(nucleic acid binding);GO:0003677(DNA binding);GO:0005622(intracellular);GO:0005634(nucleus);GO:0006355(regulation of transcription, DNA-templated);GO:0006357(regulation of transcription by RNA polymerase II);GO:0007275(multicellular organism development);GO:0046872(metal ion binding)	05168(Herpes simplex virus 1 infection)	K09228	NA	HKR1, GLI-Kruppel zinc finger family member [Source:HGNC Symbol;Acc:HGNC:4928]	0	0	0	0	0.37917	0.389211	0	0.872107	-inf	-inf	3.54258e-05	0.00421622	down	yes
4963789	4969941	ENST00000380859	6	858	MSTRG.3378	AKR1C1	GO:0001523(retinoid metabolic process);GO:0004032(alditol:NADP+ 1-oxidoreductase activity);GO:0004033(aldo-keto reductase (NADP) activity);GO:0005515(protein binding);GO:0005737(cytoplasm);GO:0005829(cytosol);GO:0006805(xenobiotic metabolic process);GO:0007586(digestion);GO:0008106(alcohol dehydrogenase (NADP+) activity);GO:0008202(steroid metabolic process);GO:0008206(bile acid metabolic process…	00140(Steroid hormone biosynthesis);00980(Metabolism of xenobiotics by cytochrome P450)	K00212	1.1.1.357;1.3.1.20;EC:1.1.1.149	aldo-keto reductase family 1 member C1 [Source:HGNC Symbol;Acc:HGNC:384]	0	0.07675	0.044129	0.004135	1.60764	2.40818	2.14967	0.803945	0.0179375	-5.80088	3.61014e-05	0.00428824	down	yes
2760033	2762211	ENST00000572952	2	1118	MSTRG.11886	SRRM2	GO:0000398(mRNA splicing, via spliceosome);GO:0003723(RNA binding);GO:0005515(protein binding);GO:0005634(nucleus);GO:0005654(nucleoplasm);GO:0005681(spliceosomal complex);GO:0006397(mRNA processing);GO:0008380(RNA splicing);GO:0015030(Cajal body);GO:0016607(nuclear speck);GO:0047485(protein N-terminus binding);GO:0070742(C2H2 zinc finger domain binding);GO:0071007(U2-type catalytic step 2 splice…	NA	K13172	NA	serine/arginine repetitive matrix 2 [Source:HGNC Symbol;Acc:HGNC:16639]	0.603774	0.714594	0.73564	0.926746	23.6988	1.08877	18.9711	31.498	0.0396078	-4.65807	3.6401e-05	0.0043154	down	yes
5105541	5112330	MSTRG.13464.3	3	1999	MSTRG.13464	ZNF232	NA	NA	NA	NA	NA	0	0	0	0	0.230385	0	0.985882	1.39556	-inf	-inf	3.68932e-05	0.00436129	down	yes
10570766	10689957	MSTRG.17886.2	20	3388	MSTRG.17886	NOL10	NA	NA	NA	NA	NA	0	7.40168	5.3192	0	0	0	0	0	inf	inf	3.69315e-05	0.00436129	up	yes
23983809	24025272	MSTRG.33763.2	4	6267	MSTRG.33763	KLHL15	NA	NA	NA	NA	NA	2.91616	0	3.48565	0	0	0	0	0	inf	inf	3.72902e-05	0.00439512	up	yes
35139304	35229333	ENST00000352818	8	1023	MSTRG.5179	CD44	GO:0004888(transmembrane signaling receptor activity);GO:0004896(cytokine receptor activity);GO:0005515(protein binding);GO:0005518(collagen binding);GO:0005540(hyaluronic acid binding);GO:0005794(Golgi apparatus);GO:0005829(cytosol);GO:0005886(plasma membrane);GO:0005887(integral component of plasma membrane);GO:0005902(microvillus);GO:0005925(focal adhesion);GO:0006954(inflammatory response);GO…	04512(ECM-receptor interaction);04640(Hematopoietic cell lineage);05131(Shigellosis);05169(Epstein-Barr virus infection);05205(Proteoglycans in cancer);05206(MicroRNAs in cancer)	NA	NA	CD44 molecule (Indian blood group) [Source:HGNC Symbol;Acc:HGNC:1681]	0	0	0	0	25.86	20.439	0	0	-inf	-inf	3.75001e-05	0.0044113	down	yes
141207181	141296326	MSTRG.32016.3	8	7838	MSTRG.32016	SLC45A4	NA	NA	NA	NA	NA	0.002287	0.006817	0.008893	0.000752	0.006485	0.005069	2.38651	2.44279	0.00387307	-8.01231	3.83283e-05	0.00450002	down	yes
22424417	22443192	MSTRG.32345.1	2	18691	MSTRG.32345	.	NA	NA	NA	NA	NA	1.74514	1.59235	1.25283	1.37313	0.144502	0.084168	0.129684	0.17612	11.1576	3.47996	3.89771e-05	0.00456738	up	yes
38619186	38635485	ENST00000538434	6	966	MSTRG.17158	EIF3K	GO:0001732(formation of cytoplasmic translation initiation complex);GO:0002183(cytoplasmic translational initiation);GO:0003723(RNA binding);GO:0003743(translation initiation factor activity);GO:0005515(protein binding);GO:0005634(nucleus);GO:0005737(cytoplasm);GO:0005829(cytosol);GO:0005852(eukaryotic translation initiation factor 3 complex);GO:0006412(translation);GO:0006413(translational initi…	NA	K15028	NA	eukaryotic translation initiation factor 3 subunit K [Source:HGNC Symbol;Acc:HGNC:24656]	0	0	0	0	1.61037	1.80499	1.08976	0	-inf	-inf	3.90756e-05	0.00457011	down	yes
41143142	41196133	MSTRG.21318.5	6	28398	MSTRG.21318	LINC00323	NA	NA	NA	NA	NA	0.001263	0.304823	0.002087	9.87026	0.000333	0.004664	0.010685	0.005174	488.034	8.93084	3.938e-05	0.00459174	up	yes
35669471	35699352	ENST00000541387	12	1436	MSTRG.20579	NFS1	GO:0000096(sulfur amino acid metabolic process);GO:0003824(catalytic activity);GO:0005515(protein binding);GO:0005634(nucleus);GO:0005654(nucleoplasm);GO:0005737(cytoplasm);GO:0005739(mitochondrion);GO:0005759(mitochondrial matrix);GO:0005829(cytosol);GO:0006777(Mo-molybdopterin cofactor biosynthetic process);GO:0016740(transferase activity);GO:0018283(iron incorporation into metallo-sulfur clust…	00730(Thiamine metabolism);04122(Sulfur relay system)	K04487	EC:2.8.1.7	NFS1, cysteine desulfurase [Source:HGNC Symbol;Acc:HGNC:15910]	0	0	0	0	1.06003	0.755047	0	1.21647	-inf	-inf	3.95434e-05	0.00459174	down	yes
119711940	119734682	ENST00000462324	7	767	MSTRG.1806	PHGDH	GO:0004617(phosphoglycerate dehydrogenase activity);GO:0005829(cytosol);GO:0006520(cellular amino acid metabolic process);GO:0006541(glutamine metabolic process);GO:0006544(glycine metabolic process);GO:0006563(L-serine metabolic process);GO:0006564(L-serine biosynthetic process);GO:0006566(threonine metabolic process);GO:0007420(brain development);GO:0008652(cellular amino acid biosynthetic proc…	00260(Glycine, serine and threonine metabolism)	K00058	1.1.1.399;EC:1.1.1.95	phosphoglycerate dehydrogenase [Source:HGNC Symbol;Acc:HGNC:8923]	2.45704	15.8563	1.17459	0	0	0	0.017913	0	1087.92	10.0874	3.96476e-05	0.00459174	up	yes
75399543	75404855	MSTRG.5856.14	6	977	MSTRG.5856	RPS3	NA	NA	NA	NA	NA	0	0	0	0	0	0	16.9921	34.3637	-inf	-inf	3.96841e-05	0.00459174	down	yes
74950743	74954972	ENST00000532395	6	2165	MSTRG.15122	HID1	GO:0000138(Golgi trans cisterna);GO:0000139(Golgi membrane);GO:0005515(protein binding);GO:0005737(cytoplasm);GO:0005794(Golgi apparatus);GO:0005797(Golgi medial cisterna);GO:0005829(cytosol);GO:0005881(cytoplasmic microtubule);GO:0006886(intracellular protein transport);GO:0016020(membrane);GO:0031001(response to brefeldin A);GO:0070062(extracellular exosome);GO:0090498(extrinsic component of Go…	NA	NA	NA	HID1 domain containing [Source:HGNC Symbol;Acc:HGNC:15736]	0.014867	0.087533	0.052245	0.234158	2.1791	4.4849	2.46964	1.98234	0.0349769	-4.83745	3.97111e-05	0.00459174	down	yes
76510615	76515456	ENST00000394849	5	1041	MSTRG.30031	UPK3B	GO:0005886(plasma membrane);GO:0010629(negative regulation of gene expression);GO:0016020(membrane);GO:0016021(integral component of membrane)	NA	NA	NA	uroplakin 3B [Source:HGNC Symbol;Acc:HGNC:21444]	1.15688	2.08531	0.855144	0	0	0	0	0	inf	inf	3.97135e-05	0.00459174	up	yes
106098940	106109939	ENST00000369089	5	4675	MSTRG.28618	PRDM1	GO:0000122(negative regulation of transcription by RNA polymerase II);GO:0000977(RNA polymerase II regulatory region sequence-specific DNA binding);GO:0000978(RNA polymerase II proximal promoter sequence-specific DNA binding);GO:0000981(DNA-binding transcription factor activity, RNA polymerase II-specific);GO:0001227(DNA-binding transcription repressor activity, RNA polymerase II-specific);GO:000…	NA	NA	NA	PR/SET domain 1 [Source:HGNC Symbol;Acc:HGNC:9346]	0	0	0	0	0	0.281557	0.457817	0.22821	-inf	-inf	3.98101e-05	0.00459418	down	yes
132727133	132732100	ENST00000542657	4	2446	MSTRG.8401	ANKLE2	GO:0005515(protein binding);GO:0005783(endoplasmic reticulum);GO:0005789(endoplasmic reticulum membrane);GO:0007049(cell cycle);GO:0007084(mitotic nuclear envelope reassembly);GO:0007417(central nervous system development);GO:0016020(membrane);GO:0016021(integral component of membrane);GO:0019888(protein phosphatase regulator activity);GO:0030176(integral component of endoplasmic reticulum membra…	NA	K21412	NA	ankyrin repeat and LEM domain containing 2 [Source:HGNC Symbol;Acc:HGNC:29101]	0	0	0	0	0.78911	0.763027	0	0.292228	-inf	-inf	3.99528e-05	0.00460191	down	yes
17375420	17735994	ENST00000380060	8	8761	MSTRG.33703	NHS	GO:0002088(lens development in camera-type eye);GO:0005737(cytoplasm);GO:0005794(Golgi apparatus);GO:0005886(plasma membrane);GO:0005923(bicellular tight junction);GO:0005925(focal adhesion);GO:0016020(membrane);GO:0016324(apical plasma membrane);GO:0016604(nuclear body);GO:0030027(lamellipodium);GO:0030054(cell junction);GO:0030154(cell differentiation);GO:0042995(cell projection)	NA	NA	NA	NHS actin remodeling regulator [Source:HGNC Symbol;Acc:HGNC:7820]	0	0	0	0	0	2.58101	2.61686	0	-inf	-inf	4.04568e-05	0.00463566	down	yes
6467122	6471583	ENST00000487949	9	2664	ENSG00000171680	PLEKHG5	GO:0005089(Rho guanyl-nucleotide exchange factor activity);GO:0005737(cytoplasm);GO:0005829(cytosol);GO:0005886(plasma membrane);GO:0005911(cell-cell junction);GO:0007186(G protein-coupled receptor signaling pathway);GO:0016020(membrane);GO:0030027(lamellipodium);GO:0030054(cell junction);GO:0030139(endocytic vesicle);GO:0035023(regulation of Rho protein signal transduction);GO:0035767(endothelia…	05200(Pathways in cancer)	NA	NA	pleckstrin homology and RhoGEF domain containing G5 [Source:HGNC Symbol;Acc:HGNC:29105]	0	0	0	0	0.507676	0	0.553393	0.578546	-inf	-inf	4.04731e-05	0.00463566	down	yes
53532096	53654107	MSTRG.33993.1	81	14290	MSTRG.33993	HUWE1	NA	NA	NA	NA	NA	1.04377	1.36656	0.938446	0.870725	8.69413	15.3505	10.9419	7.77578	0.0986732	-3.3412	4.04745e-05	0.00463566	down	yes
41976664	42017419	ENST00000316603	13	1468	MSTRG.14368	DNAJC7	GO:0005515(protein binding);GO:0005634(nucleus);GO:0005654(nucleoplasm);GO:0005737(cytoplasm);GO:0005829(cytosol);GO:0005856(cytoskeleton);GO:0006457(protein folding);GO:0016020(membrane);GO:0031072(heat shock protein binding);GO:0051085(chaperone cofactor-dependent protein refolding);GO:0070062(extracellular exosome);GO:1900034(regulation of cellular response to heat)	NA	K09527	NA	DnaJ heat shock protein family (Hsp40) member C7 [Source:HGNC Symbol;Acc:HGNC:12392]	0	0	0	0	0	0	17.3604	14.6055	-inf	-inf	4.11194e-05	0.00470068	down	yes
45502883	45563352	ENST00000402984	16	2355	MSTRG.22120	FBLN1	GO:0001933(negative regulation of protein phosphorylation);GO:0001968(fibronectin binding);GO:0005201(extracellular matrix structural constituent);GO:0005509(calcium ion binding);GO:0005576(extracellular region);GO:0005604(basement membrane);GO:0005615(extracellular space);GO:0007162(negative regulation of cell adhesion);GO:0007566(embryo implantation);GO:0008022(protein C-terminus binding);GO:00…	NA	K17307	NA	fibulin 1 [Source:HGNC Symbol;Acc:HGNC:3600]	0.042784	0.060983	0.411662	0.030025	13.5005	14.7543	16.241	0.031093	0.01225	-6.35107	4.12046e-05	0.00470158	down	yes
40735315	40771093	ENST00000440226	10	1717	MSTRG.845	NFYC	GO:0000978(RNA polymerase II proximal promoter sequence-specific DNA binding);GO:0000980(RNA polymerase II distal enhancer sequence-specific DNA binding);GO:0000981(DNA-binding transcription factor activity, RNA polymerase II-specific);GO:0001228(DNA-binding transcription activator activity, RNA polymerase II-specific);GO:0003677(DNA binding);GO:0003700(DNA-binding transcription factor activity);…	04612(Antigen processing and presentation);05152(Tuberculosis)	K08066	NA	nuclear transcription factor Y subunit gamma [Source:HGNC Symbol;Acc:HGNC:7806]	0	0	0	0	0.123353	1.01848	0	2.29551	-inf	-inf	4.17307e-05	0.00475269	down	yes
81681523	81683728	MSTRG.15379.12	4	615	MSTRG.15379	ARL16	NA	NA	NA	NA	NA	0	1.61005	1.71775	3.4122	0	0	0	0	inf	inf	4.20084e-05	0.00477537	up	yes
90912096	90921276	ENST00000371697	9	1979	MSTRG.4215	ANKRD1	GO:0000122(negative regulation of transcription by RNA polymerase II);GO:0001085(RNA polymerase II transcription factor binding);GO:0001650(fibrillar center);GO:0002039(p53 binding);GO:0003677(DNA binding);GO:0003713(transcription coactivator activity);GO:0003714(transcription corepressor activity);GO:0005515(protein binding);GO:0005634(nucleus);GO:0005654(nucleoplasm);GO:0005737(cytoplasm);GO:00…	NA	K21433	NA	ankyrin repeat domain 1 [Source:HGNC Symbol;Acc:HGNC:15819]	4.79765	4.26289	6.05955	4.65394	0.21388	0.309742	0.263723	0.464821	15.7919	3.98111	4.21277e-05	0.00478	up	yes
89316328	89320830	ENST00000530292	7	1326	MSTRG.11525	POLG	GO:0002020(protease binding);GO:0003677(DNA binding);GO:0003682(chromatin binding);GO:0003887(DNA-directed DNA polymerase activity);GO:0005515(protein binding);GO:0005739(mitochondrion);GO:0005760(gamma DNA polymerase complex);GO:0006259(DNA metabolic process);GO:0006260(DNA replication);GO:0006261(DNA-dependent DNA replication);GO:0006264(mitochondrial DNA replication);GO:0006287(base-excision r…	NA	K02332	EC:2.7.7.7	DNA polymerase gamma, catalytic subunit [Source:HGNC Symbol;Acc:HGNC:9179]	0.009054	0.057804	0.024384	0.05986	0.044154	2.82443	2.31702	2.72339	0.0191051	-5.7099	4.27858e-05	0.00484208	down	yes
36389896	36426034	MSTRG.29636.7	18	2676	MSTRG.29636	ANLN	NA	NA	NA	NA	NA	0	0	0	0	0	0	5.82226	11.7944	-inf	-inf	4.2834e-05	0.00484208	down	yes
165984641	166149135	ENST00000641575	28	12874	MSTRG.19404	SCN1A	GO:0001508(action potential);GO:0001518(voltage-gated sodium channel complex);GO:0005216(ion channel activity);GO:0005244(voltage-gated ion channel activity);GO:0005248(voltage-gated sodium channel activity);GO:0005272(sodium channel activity);GO:0005654(nucleoplasm);GO:0005886(plasma membrane);GO:0006811(ion transport);GO:0006814(sodium ion transport);GO:0007628(adult walking behavior);GO:001470…	04728(Dopaminergic synapse)	K04833	NA	sodium voltage-gated channel alpha subunit 1 [Source:HGNC Symbol;Acc:HGNC:10585]	0	0	0	0	0.336083	0.068616	0	0.029065	-inf	-inf	4.33639e-05	0.00488573	down	yes
104937255	104969967	MSTRG.10276.20	9	11248	MSTRG.10276	AHNAK2	NA	NA	NA	NA	NA	3.08242	3.84611	2.69745	0.340982	0.15608	0.161666	0.129029	0.197933	15.4596	3.95044	4.3513e-05	0.00488573	up	yes
7439880	7443428	ENST00000572907	4	2358	MSTRG.13540	FGF11	GO:0005576(extracellular region);GO:0007165(signal transduction);GO:0007267(cell-cell signaling);GO:0007399(nervous system development);GO:0008083(growth factor activity);GO:0010469(regulation of signaling receptor activity)	NA	NA	NA	fibroblast growth factor 11 [Source:HGNC Symbol;Acc:HGNC:3667]	0.481275	0.894284	0.383142	0	0	0	0	0	inf	inf	4.35488e-05	0.00488573	up	yes
104064546	104103407	MSTRG.7965.3	16	2609	MSTRG.7965	HCFC2	NA	NA	NA	NA	NA	0.026127	0.024584	0	0.023243	1.84589	0.718895	0.057155	2.36435	0.0148315	-6.07519	4.36168e-05	0.00488573	down	yes
57628304	57665016	MSTRG.12709.26	15	4168	MSTRG.12709	ADGRG1	NA	NA	NA	NA	NA	5.56496	12.199	16.9665	8.62653	0.08485	0.170589	1.41383	0.703693	18.2713	4.1915	4.36218e-05	0.00488573	up	yes
19534007	19887597	MSTRG.33724.2	18	4669	MSTRG.33724	SH3KBP1	NA	NA	NA	NA	NA	3.31076	5.48548	0	0	0	0	0	0	inf	inf	4.39206e-05	0.00491014	up	yes
55974101	55990084	ENST00000551459	5	569	MSTRG.7432	RAB5B	GO:0000166(nucleotide binding);GO:0003924(GTPase activity);GO:0005515(protein binding);GO:0005525(GTP binding);GO:0005622(intracellular);GO:0005768(endosome);GO:0005769(early endosome);GO:0005886(plasma membrane);GO:0006886(intracellular protein transport);GO:0006897(endocytosis);GO:0007032(endosome organization);GO:0015031(protein transport);GO:0016020(membrane);GO:0019003(GDP binding);GO:001988…	04014(Ras signaling pathway);04144(Endocytosis);04145(Phagosome);04962(Vasopressin-regulated water reabsorption);05146(Amoebiasis);05152(Tuberculosis)	K07888	NA	RAB5B, member RAS oncogene family [Source:HGNC Symbol;Acc:HGNC:9784]	0	0	0	0	1.83887	1.37019	0.133113	0.283359	-inf	-inf	4.42007e-05	0.00493239	down	yes
33014130	33040900	ENST00000643244	10	1542	MSTRG.29595	NT5C3A	GO:0000166(nucleotide binding);GO:0000215(tRNA 2'-phosphotransferase activity);GO:0000287(magnesium ion binding);GO:0005737(cytoplasm);GO:0005783(endoplasmic reticulum);GO:0005829(cytosol);GO:0006213(pyrimidine nucleoside metabolic process);GO:0008253(5'-nucleotidase activity);GO:0009117(nucleotide metabolic process);GO:0016311(dephosphorylation);GO:0016740(transferase activity);GO:0016787(hydrol…	00230(Purine metabolism);00240(Pyrimidine metabolism);00760(Nicotinate and nicotinamide metabolism)	K01081	EC:3.1.3.5	5'-nucleotidase, cytosolic IIIA [Source:HGNC Symbol;Acc:HGNC:17820]	0.007102	0	0.041695	0.015566	1.08926	0.920686	0.561879	0.962007	0.0182134	-5.77886	4.49211e-05	0.0050036	down	yes
85792790	85799419	ENST00000647374	2	4249	ENSG00000184564	SLITRK6	GO:0001964(startle response);GO:0002088(lens development in camera-type eye);GO:0002093(auditory receptor cell morphogenesis);GO:0005515(protein binding);GO:0005886(plasma membrane);GO:0005887(integral component of plasma membrane);GO:0007409(axonogenesis);GO:0007416(synapse assembly);GO:0007601(visual perception);GO:0007605(sensory perception of sound);GO:0008344(adult locomotory behavior);GO:00…	NA	NA	NA	SLIT and NTRK like family member 6 [Source:HGNC Symbol;Acc:HGNC:23503]	0.362063	0.290028	0.276944	0	0	0	0	0	inf	inf	4.53808e-05	0.00503725	up	yes
48121197	48170326	MSTRG.17470.10	24	2495	MSTRG.17470	LIG1	NA	NA	NA	NA	NA	0	0	0	0	0	7.57785	8.67086	0	-inf	-inf	4.53889e-05	0.00503725	down	yes
28493360	28508705	MSTRG.603.2	3	293	MSTRG.603	PHACTR4	NA	NA	NA	NA	NA	0.038741	0.051469	0	0.062218	99.4729	0.05717	0.10208	6.46855	0.00143664	-9.44309	4.58773e-05	0.00508218	down	yes
16550850	16571536	ENST00000409648	6	3691	MSTRG.16729	SLC35E1	GO:0005794(Golgi apparatus);GO:0015297(antiporter activity);GO:0016020(membrane);GO:0016021(integral component of membrane);GO:0022857(transmembrane transporter activity);GO:0055085(transmembrane transport)	NA	K15283	NA	solute carrier family 35 member E1 [Source:HGNC Symbol;Acc:HGNC:20803]	0.014723	0.025934	0.015564	0.064264	0.120791	3.17303	14.3836	0.012157	0.00681106	-7.1979	4.6071e-05	0.00509437	down	yes
30803086	30889635	ENST00000424224	6	861	MSTRG.21811	OSBP2	GO:0005515(protein binding);GO:0005829(cytosol);GO:0005886(plasma membrane);GO:0006869(lipid transport);GO:0007286(spermatid development);GO:0008289(lipid binding);GO:0015248(sterol transporter activity);GO:0015485(cholesterol binding);GO:0015918(sterol transport);GO:0016020(membrane);GO:0032934(sterol binding);GO:0043231(intracellular membrane-bounded organelle);GO:0097038(perinuclear endoplasmi…	NA	K20462	NA	oxysterol binding protein 2 [Source:HGNC Symbol;Acc:HGNC:8504]	8.66199	0.000236	7.34756	0.001887	0	0.00056	0.009412	0.000502	1528.71	10.5781	4.69084e-05	0.00517755	up	yes
36214637	36238766	MSTRG.17086.5	3	3564	MSTRG.17086	ZNF146	NA	NA	NA	NA	NA	0	0	0	0	1.47197	0	14.6934	0	-inf	-inf	4.7034e-05	0.00518201	down	yes
82687001	82965971	ENST00000548305	6	2682	MSTRG.7768	TMTC2	GO:0000030(mannosyltransferase activity);GO:0004169(dolichyl-phosphate-mannose-protein mannosyltransferase activity);GO:0005515(protein binding);GO:0005783(endoplasmic reticulum);GO:0005789(endoplasmic reticulum membrane);GO:0006486(protein glycosylation);GO:0016020(membrane);GO:0016021(integral component of membrane);GO:0016740(transferase activity);GO:0035269(protein O-linked mannosylation);GO:…	NA	NA	NA	transmembrane and tetratricopeptide repeat containing 2 [Source:HGNC Symbol;Acc:HGNC:25440]	0	0	0	0	0.016459	1.02231	0.29866	0.022105	-inf	-inf	4.73135e-05	0.00520337	down	yes
15643267	15726353	ENST00000396355	10	3936	MSTRG.12141	NDE1	GO:0000086(G2/M transition of mitotic cell cycle);GO:0000132(establishment of mitotic spindle orientation);GO:0000775(chromosome, centromeric region);GO:0000776(kinetochore);GO:0000777(condensed chromosome kinetochore);GO:0001764(neuron migration);GO:0005515(protein binding);GO:0005694(chromosome);GO:0005737(cytoplasm);GO:0005813(centrosome);GO:0005815(microtubule organizing center);GO:0005819(sp…	NA	K16738	NA	nudE neurodevelopment protein 1 [Source:HGNC Symbol;Acc:HGNC:17619]	0	0	0	0	0.406612	0.833362	0	0.069957	-inf	-inf	4.7669e-05	0.005233	down	yes
151771583	151790522	ENST00000440583	14	2299	MSTRG.2121	TDRKH	GO:0003676(nucleic acid binding);GO:0003723(RNA binding);GO:0005737(cytoplasm);GO:0005739(mitochondrion);GO:0007140(male meiotic nuclear division);GO:0007283(spermatogenesis);GO:0009566(fertilization);GO:0016020(membrane);GO:0016021(integral component of membrane);GO:0030154(cell differentiation);GO:0031047(gene silencing by RNA);GO:0034587(piRNA metabolic process);GO:0043046(DNA methylation invo…	NA	K18406	NA	tudor and KH domain containing [Source:HGNC Symbol;Acc:HGNC:11713]	0.31876	0.606361	0.833728	0	0	0	0	0	inf	inf	4.78691e-05	0.00524551	up	yes
191268314	191331882	MSTRG.24058.4	8	2191	MSTRG.24058	UTS2B	NA	NA	NA	NA	NA	0.386723	0	0.692002	0.652808	0	0	0	0	inf	inf	4.80258e-05	0.00525321	up	yes
110491731	110501677	MSTRG.8071.9	4	2471	MSTRG.8071	VPS29	NA	NA	NA	NA	NA	0	3.34557	11.8786	0	0	0	0	0	inf	inf	4.81684e-05	0.00525935	up	yes
182382894	182391792	ENST00000339526	7	3942	MSTRG.2576	GLUL	GO:0000166(nucleotide binding);GO:0000287(magnesium ion binding);GO:0001504(neurotransmitter uptake);GO:0001525(angiogenesis);GO:0003824(catalytic activity);GO:0004356(glutamate-ammonia ligase activity);GO:0005515(protein binding);GO:0005524(ATP binding);GO:0005634(nucleus);GO:0005737(cytoplasm);GO:0005739(mitochondrion);GO:0005783(endoplasmic reticulum);GO:0005791(rough endoplasmic reticulum);GO…	00220(Arginine biosynthesis);00250(Alanine, aspartate and glutamate metabolism);00630(Glyoxylate and dicarboxylate metabolism);00910(Nitrogen metabolism);04217(Necroptosis);04724(Glutamatergic synapse);04727(GABAergic synapse)	K01915	EC:6.3.1.2	glutamate-ammonia ligase [Source:HGNC Symbol;Acc:HGNC:4341]	0.031151	0.029243	0.035275	0.046745	0.092223	3.85756	3.29499	0.217202	0.0190853	-5.71139	4.84195e-05	0.00526753	down	yes
5548902	5555054	MSTRG.16339.4	3	4327	MSTRG.16339	.	NA	NA	NA	NA	NA	0	0	0	0	0	3.90907	0	4.90478	-inf	-inf	4.84277e-05	0.00526753	down	yes
50200979	50217615	ENST00000611222	9	2314	MSTRG.22207	SELENOO	GO:0000166(nucleotide binding);GO:0005524(ATP binding);GO:0005739(mitochondrion);GO:0016740(transferase activity);GO:0016779(nucleotidyltransferase activity);GO:0018117(protein adenylylation);GO:0046872(metal ion binding);GO:0070733(protein adenylyltransferase activity)	NA	NA	NA	selenoprotein O [Source:HGNC Symbol;Acc:HGNC:30395]	0.009438	1.67159	1.98845	1.80639	0.009481	0.03256	0.039105	0.003095	65.0024	6.02242	4.85032e-05	0.00526753	up	yes
32540826	32552553	ENST00000379858	2	3621	MSTRG.32402	TOPORS	GO:0000151(ubiquitin ligase complex);GO:0000209(protein polyubiquitination);GO:0000922(spindle pole);GO:0000930(gamma-tubulin complex);GO:0003677(DNA binding);GO:0003823(antigen binding);GO:0004842(ubiquitin-protein transferase activity);GO:0005515(protein binding);GO:0005634(nucleus);GO:0005654(nucleoplasm);GO:0005814(centriole);GO:0005868(cytoplasmic dynein complex);GO:0006351(transcription, DN…	NA	K10631	EC:2.3.2.27	TOP1 binding arginine/serine rich protein [Source:HGNC Symbol;Acc:HGNC:21653]	0	0	0	0	0.167023	0	0.353765	0.744749	-inf	-inf	4.97903e-05	0.00539687	down	yes
70254390	70262361	ENST00000565361	7	839	MSTRG.12918	AARS	GO:0000049(tRNA binding);GO:0000166(nucleotide binding);GO:0002161(aminoacyl-tRNA editing activity);GO:0002196(Ser-tRNA(Ala) hydrolase activity);GO:0003676(nucleic acid binding);GO:0003723(RNA binding);GO:0004812(aminoacyl-tRNA ligase activity);GO:0004813(alanine-tRNA ligase activity);GO:0005524(ATP binding);GO:0005737(cytoplasm);GO:0005829(cytosol);GO:0006400(tRNA modification);GO:0006412(transl…	00970(Aminoacyl-tRNA biosynthesis)	NA	NA	alanyl-tRNA synthetase [Source:HGNC Symbol;Acc:HGNC:20]	8.33068	0.14589	7.95329	0.945689	0.061508	0.083187	0.073603	0	79.5955	6.31462	4.98716e-05	0.00539687	up	yes
93378578	93402301	MSTRG.7832.10	6	3623	MSTRG.7832	NUDT4	NA	NA	NA	NA	NA	0	0	0	0	0	2.68709	9.00362	0	-inf	-inf	5.0444e-05	0.00544912	down	yes
108665082	108940927	MSTRG.6178.3	18	3201	MSTRG.6178	DDX10	NA	NA	NA	NA	NA	0	0	0	0	0	5.9644	5.27552	0	-inf	-inf	5.06911e-05	0.00546039	down	yes
156732025	156736949	ENST00000476229	4	1096	MSTRG.2276	RRNAD1	GO:0000154(rRNA modification);GO:0000179(rRNA (adenine-N6,N6-)-dimethyltransferase activity);GO:0008649(rRNA methyltransferase activity);GO:0016020(membrane);GO:0016021(integral component of membrane);GO:0031167(rRNA methylation);GO:0032259(methylation)	NA	NA	NA	ribosomal RNA adenine dimethylase domain containing 1 [Source:HGNC Symbol;Acc:HGNC:24273]	0	0	0	0	1.3291	1.03776	0	1.28657	-inf	-inf	5.07279e-05	0.00546039	down	yes
50767506	50783659	ENST00000395598	9	2169	MSTRG.22231	RABL2B	GO:0000166(nucleotide binding);GO:0000242(pericentriolar material);GO:0003924(GTPase activity);GO:0005515(protein binding);GO:0005525(GTP binding);GO:0005737(cytoplasm);GO:0005814(centriole);GO:0005856(cytoskeleton);GO:0005929(cilium);GO:0006886(intracellular protein transport);GO:0030030(cell projection organization);GO:0032482(Rab protein signal transduction);GO:0036064(ciliary basal body);GO:0…	NA	K07931	NA	RAB, member of RAS oncogene family like 2B [Source:HGNC Symbol;Acc:HGNC:9800]	0	0	0.006605	0	0.571658	0.818837	0.404273	0.032074	0.00361553	-8.11158	5.08456e-05	0.00546339	down	yes
34927044	34945009	ENST00000601142	5	2280	ENSG00000168661	ZNF30	GO:0000981(DNA-binding transcription factor activity, RNA polymerase II-specific);GO:0003676(nucleic acid binding);GO:0003677(DNA binding);GO:0005622(intracellular);GO:0005634(nucleus);GO:0006355(regulation of transcription, DNA-templated);GO:0006357(regulation of transcription by RNA polymerase II);GO:0046872(metal ion binding)	05168(Herpes simplex virus 1 infection)	K09228	NA	zinc finger protein 30 [Source:HGNC Symbol;Acc:HGNC:13090]	0	0.716383	0.240558	0.828733	0	0	0	0	inf	inf	5.11293e-05	0.00548418	up	yes
18434388	18438301	ENST00000338128	11	2420	MSTRG.16804	ISYNA1	GO:0004512(inositol-3-phosphate synthase activity);GO:0005515(protein binding);GO:0005737(cytoplasm);GO:0005829(cytosol);GO:0006021(inositol biosynthetic process);GO:0006629(lipid metabolic process);GO:0008654(phospholipid biosynthetic process);GO:0016853(isomerase activity);GO:0043647(inositol phosphate metabolic process)	00562(Inositol phosphate metabolism)	K01858	EC:5.5.1.4	inositol-3-phosphate synthase 1 [Source:HGNC Symbol;Acc:HGNC:29821]	0.091189	0.091328	0.029813	0.034721	1.16042	1.0048	1.34379	1.17955	0.0526922	-4.24627	5.15303e-05	0.00551746	down	yes
45693065	45703296	MSTRG.17379.5	7	1228	MSTRG.17379	QPCTL	NA	NA	NA	NA	NA	2.98766	9.38913	0.112778	0.23258	0.006815	0.008308	0.012479	0.097601	101.612	6.66693	5.17546e-05	0.00553174	up	yes
73626158	73941992	ENST00000545377	37	6351	MSTRG.26247	ARHGEF28	GO:0003723(RNA binding);GO:0005085(guanyl-nucleotide exchange factor activity);GO:0005089(Rho guanyl-nucleotide exchange factor activity);GO:0005737(cytoplasm);GO:0005829(cytosol);GO:0005886(plasma membrane);GO:0016020(membrane);GO:0030154(cell differentiation);GO:0035023(regulation of Rho protein signal transduction);GO:0035556(intracellular signal transduction);GO:0046872(metal ion binding);GO:…	NA	K21072	NA	Rho guanine nucleotide exchange factor 28 [Source:HGNC Symbol;Acc:HGNC:30322]	0.005263	1.12095	0.005511	0.953314	0	0.004261	0	0.001857	340.803	8.4128	5.19376e-05	0.00554156	up	yes
136045745	136055189	ENST00000515433	4	4661	MSTRG.26839	TGFBI	GO:0001525(angiogenesis);GO:0002062(chondrocyte differentiation);GO:0005178(integrin binding);GO:0005201(extracellular matrix structural constituent);GO:0005515(protein binding);GO:0005518(collagen binding);GO:0005576(extracellular region);GO:0005604(basement membrane);GO:0005615(extracellular space);GO:0005802(trans-Golgi network);GO:0005886(plasma membrane);GO:0007155(cell adhesion);GO:0007162(…	NA	K19519	NA	transforming growth factor beta induced [Source:HGNC Symbol;Acc:HGNC:11771]	1.69205	1.11025	1.79568	0.905107	0.018651	0.064279	0.130763	0.068192	19.5225	4.28706	5.22157e-05	0.00555547	up	yes
38797729	38875879	MSTRG.18182.1	25	4718	MSTRG.18182	DHX57	NA	NA	NA	NA	NA	3.07048	0	0	3.27129	0	0	0	0	inf	inf	5.23175e-05	0.00555547	up	yes
26452083	26479546	ENST00000464362	12	4277	MSTRG.21723	HPS4	GO:0005085(guanyl-nucleotide exchange factor activity);GO:0005515(protein binding);GO:0005737(cytoplasm);GO:0005764(lysosome);GO:0005829(cytosol);GO:0006605(protein targeting);GO:0006996(organelle organization);GO:0007040(lysosome organization);GO:0007596(blood coagulation);GO:0007599(hemostasis);GO:0016020(membrane);GO:0017137(Rab GTPase binding);GO:0030318(melanocyte differentiation);GO:0031085…	NA	K20194	NA	HPS4, biogenesis of lysosomal organelles complex 3 subunit 2 [Source:HGNC Symbol;Acc:HGNC:15844]	1.05882	1.05874	0.235936	0.804631	0.012104	0.065557	0.039743	0.034973	20.7257	4.37335	5.2342e-05	0.00555547	up	yes
9068807	9480463	MSTRG.20274.3	39	5250	MSTRG.20274	PLCB4	NA	NA	NA	NA	NA	2.65868	0	2.83485	0	0	0	0	0	inf	inf	5.28406e-05	0.00559861	up	yes
1442162	1466828	ENST00000353088	8	2611	MSTRG.20197	NSFL1C	GO:0000045(autophagosome assembly);GO:0000132(establishment of mitotic spindle orientation);GO:0005515(protein binding);GO:0005543(phospholipid binding);GO:0005634(nucleus);GO:0005654(nucleoplasm);GO:0005694(chromosome);GO:0005737(cytoplasm);GO:0005794(Golgi apparatus);GO:0005795(Golgi stack);GO:0005815(microtubule organizing center);GO:0005829(cytosol);GO:0005856(cytoskeleton);GO:0005886(plasma …	04141(Protein processing in endoplasmic reticulum)	K14012	NA	NSFL1 cofactor [Source:HGNC Symbol;Acc:HGNC:15912]	0	0	0	0	0	7.32555	5.96643	0	-inf	-inf	5.32494e-05	0.00563212	down	yes
10445556	10576955	ENST00000380779	10	6044	MSTRG.33631	MID1	GO:0000226(microtubule cytoskeleton organization);GO:0005515(protein binding);GO:0005622(intracellular);GO:0005737(cytoplasm);GO:0005819(spindle);GO:0005829(cytosol);GO:0005856(cytoskeleton);GO:0005874(microtubule);GO:0005875(microtubule associated complex);GO:0005881(cytoplasmic microtubule);GO:0007026(negative regulation of microtubule depolymerization);GO:0007389(pattern specification process)…	04120(Ubiquitin mediated proteolysis)	K08285	EC:2.3.2.27	midline 1 [Source:HGNC Symbol;Acc:HGNC:7095]	0.016133	0.011953	0.002547	0.003375	4.69997	0.011483	0.005334	2.73414	0.00456426	-7.7754	5.39046e-05	0.00569152	down	yes
19910260	19990131	ENST00000345530	28	6960	MSTRG.17934	WDR35	GO:0005515(protein binding);GO:0005737(cytoplasm);GO:0005813(centrosome);GO:0005815(microtubule organizing center);GO:0005856(cytoskeleton);GO:0005929(cilium);GO:0005930(axoneme);GO:0009636(response to toxic substance);GO:0010629(negative regulation of gene expression);GO:0030030(cell projection organization);GO:0030991(intraciliary transport particle A);GO:0032496(response to lipopolysaccharide)…	NA	K19674	NA	WD repeat domain 35 [Source:HGNC Symbol;Acc:HGNC:29250]	0.49718	2.0038	0.000412	0.000163	0.001223	0	0.000562	7.1e-05	1347.82	10.3964	5.4234e-05	0.00571638	up	yes
161644760	161670093	MSTRG.23752.5	2	21172	MSTRG.23752	.	NA	NA	NA	NA	NA	0.178466	0.175397	0.138159	0.208557	1.66011	1.21495	2.59282	2.34807	0.0896345	-3.4798	5.44082e-05	0.00572482	down	yes
128954180	129055173	ENST00000627585	23	4514	MSTRG.30527	TNPO3	GO:0005515(protein binding);GO:0005634(nucleus);GO:0005737(cytoplasm);GO:0006606(protein import into nucleus);GO:0008565(protein transporter activity);GO:0015031(protein transport);GO:0038023(signaling receptor activity);GO:0042802(identical protein binding);GO:0043231(intracellular membrane-bounded organelle)	NA	K15436	NA	transportin 3 [Source:HGNC Symbol;Acc:HGNC:17103]	0.00083	0.031544	4.33128	4.86679	0.00011	0.018252	0.008062	0	349.32	8.44841	5.48016e-05	0.00575112	up	yes
39953975	40035591	ENST00000560855	34	4789	MSTRG.10590	EIF2AK4	GO:0000049(tRNA binding);GO:0000077(DNA damage checkpoint);GO:0000166(nucleotide binding);GO:0002230(positive regulation of defense response to virus by host);GO:0002250(adaptive immune response);GO:0002286(T cell activation involved in immune response);GO:0002376(immune system process);GO:0002821(positive regulation of adaptive immune response);GO:0003723(RNA binding);GO:0004672(protein kinase a…	04140(Autophagy - animal);04141(Protein processing in endoplasmic reticulum);05160(Hepatitis C);05162(Measles);05164(Influenza A);05168(Herpes simplex virus 1 infection)	K16196	EC:2.7.11.1	eukaryotic translation initiation factor 2 alpha kinase 4 [Source:HGNC Symbol;Acc:HGNC:19687]	0	0	2.32361	2.81781	0	0	0	0	inf	inf	5.48474e-05	0.00575112	up	yes
63153853	63157477	ENST00000635699	5	693	MSTRG.11019	RPS27L	GO:0000028(ribosomal small subunit assembly);GO:0003723(RNA binding);GO:0003735(structural constituent of ribosome);GO:0005515(protein binding);GO:0005622(intracellular);GO:0005634(nucleus);GO:0005840(ribosome);GO:0006412(translation);GO:0006919(activation of cysteine-type endopeptidase activity involved in apoptotic process);GO:0006978(DNA damage response, signal transduction by p53 class mediat…	03010(Ribosome)	K02978	NA	ribosomal protein S27 like [Source:HGNC Symbol;Acc:HGNC:18476]	0	0	0	0	2.20678	0	1.41071	2.14104	-inf	-inf	5.50907e-05	0.0057667	down	yes
51789212	51840454	ENST00000485608	31	3149	MSTRG.1057	NRDC	GO:0003824(catalytic activity);GO:0004222(metalloendopeptidase activity);GO:0005515(protein binding);GO:0005739(mitochondrion);GO:0005829(cytosol);GO:0006508(proteolysis);GO:0007528(neuromuscular junction development);GO:0008233(peptidase activity);GO:0008237(metallopeptidase activity);GO:0008283(cell population proliferation);GO:0009986(cell surface);GO:0016477(cell migration);GO:0016787(hydrola…	NA	K01411	EC:3.4.24.61	nardilysin convertase [Source:HGNC Symbol;Acc:HGNC:7995]	0	4.9221	4.28716	0	0	0	0	0	inf	inf	5.54346e-05	0.00579272	up	yes
181236934	181243880	ENST00000511566	6	825	MSTRG.27357	RACK1	GO:0001891(phagocytic cup);GO:0001934(positive regulation of protein phosphorylation);GO:0003723(RNA binding);GO:0005080(protein kinase C binding);GO:0005102(signaling receptor binding);GO:0005515(protein binding);GO:0005634(nucleus);GO:0005654(nucleoplasm);GO:0005737(cytoplasm);GO:0005739(mitochondrion);GO:0005829(cytosol);GO:0005840(ribosome);GO:0005886(plasma membrane);GO:0006412(translation);…	05162(Measles)	K14753	NA	receptor for activated C kinase 1 [Source:HGNC Symbol;Acc:HGNC:4399]	0	0	0	0	0.916276	1.22231	2.98533	0	-inf	-inf	5.55377e-05	0.00579354	down	yes
76788957	76812895	MSTRG.9950.4	10	2855	MSTRG.9950	ANGEL1	NA	NA	NA	NA	NA	0.494919	0.317317	0	0.505945	0	0	0	0	inf	inf	5.56841e-05	0.00579887	up	yes
52206632	52214225	ENST00000493402	4	758	MSTRG.22853	ALAS1	GO:0003824(catalytic activity);GO:0003870(5-aminolevulinate synthase activity);GO:0005515(protein binding);GO:0005654(nucleoplasm);GO:0005739(mitochondrion);GO:0005759(mitochondrial matrix);GO:0005829(cytosol);GO:0006778(porphyrin-containing compound metabolic process);GO:0006782(protoporphyrinogen IX biosynthetic process);GO:0006783(heme biosynthetic process);GO:0007005(mitochondrion organizatio…	00260(Glycine, serine and threonine metabolism);00860(Porphyrin and chlorophyll metabolism)	NA	NA	5'-aminolevulinate synthase 1 [Source:HGNC Symbol;Acc:HGNC:396]	0	0	0	0	1.42693	2.71516	0	1.14382	-inf	-inf	5.67117e-05	0.00589579	down	yes
33441087	33468091	MSTRG.25878.12	18	2474	MSTRG.25878	TARS	NA	NA	NA	NA	NA	0	0	1.323	13.7454	0	0	0	0	inf	inf	5.70423e-05	0.00592004	up	yes
73271522	73297804	ENST00000540124	3	2351	ENSG00000171631	P2RY6	GO:0001621(ADP receptor activity);GO:0004930(G protein-coupled receptor activity);GO:0005515(protein binding);GO:0005886(plasma membrane);GO:0005887(integral component of plasma membrane);GO:0006909(phagocytosis);GO:0007165(signal transduction);GO:0007186(G protein-coupled receptor signaling pathway);GO:0007200(phospholipase C-activating G protein-coupled receptor signaling pathway);GO:0007202(ac…	04080(Neuroactive ligand-receptor interaction)	K04272	NA	pyrimidinergic receptor P2Y6 [Source:HGNC Symbol;Acc:HGNC:8543]	0	0	0	0	0.452846	0.7091	0	0.478612	-inf	-inf	5.7338e-05	0.00594059	down	yes
21868784	21882227	MSTRG.12278.78	4	9611	MSTRG.12278	SMG1P4	NA	NA	NA	NA	NA	2.62207	0	0.640643	0	0	0	0	0	inf	inf	5.74956e-05	0.00594363	up	yes
99542387	99568628	ENST00000369220	12	2118	MSTRG.28601	CCNC	GO:0000079(regulation of cyclin-dependent protein serine/threonine kinase activity);GO:0005515(protein binding);GO:0005634(nucleus);GO:0005654(nucleoplasm);GO:0006357(regulation of transcription by RNA polymerase II);GO:0006367(transcription initiation from RNA polymerase II promoter);GO:0016538(cyclin-dependent protein serine/threonine kinase regulator activity);GO:0016592(mediator complex);GO:0…	NA	NA	NA	cyclin C [Source:HGNC Symbol;Acc:HGNC:1581]	3.60588	0	0	10.7728	0	0	0	0	inf	inf	5.75629e-05	0.00594363	up	yes
173314713	173329503	ENST00000265087	4	5353	MSTRG.27187	STC2	GO:0005179(hormone activity);GO:0005576(extracellular region);GO:0005615(extracellular space);GO:0005783(endoplasmic reticulum);GO:0005788(endoplasmic reticulum lumen);GO:0005794(Golgi apparatus);GO:0006874(cellular calcium ion homeostasis);GO:0006979(response to oxidative stress);GO:0007566(embryo implantation);GO:0010469(regulation of signaling receptor activity);GO:0010629(negative regulation …	NA	NA	NA	stanniocalcin 2 [Source:HGNC Symbol;Acc:HGNC:11374]	15.6299	17.7061	19.5712	18.047	2.29439	1.84242	1.91619	2.25974	8.5356	3.09349	5.77396e-05	0.00595178	up	yes
37289638	37317260	MSTRG.20615.1	5	1513	MSTRG.20615	MANBAL	NA	NA	NA	NA	NA	0	0	6.1685	9.24548	0	0	0	0	inf	inf	5.83617e-05	0.00600572	up	yes
15479223	15601546	ENST00000634028	34	4790	MSTRG.24381	CC2D2A	GO:0001843(neural tube closure);GO:0005737(cytoplasm);GO:0005829(cytosol);GO:0005856(cytoskeleton);GO:0005929(cilium);GO:0007224(smoothened signaling pathway);GO:0007368(determination of left/right symmetry);GO:0007507(heart development);GO:0030030(cell projection organization);GO:0035082(axoneme assembly);GO:0035869(ciliary transition zone);GO:0036038(MKS complex);GO:0042995(cell projection);GO:…	NA	K19352	NA	coiled-coil and C2 domain containing 2A [Source:HGNC Symbol;Acc:HGNC:29253]	2.9136	0	0	2.68563	0	0	0	0	inf	inf	5.87804e-05	0.00602886	up	yes
56521981	56596135	MSTRG.7466.4	15	8367	MSTRG.7466	RBMS2	NA	NA	NA	NA	NA	0.939292	7.00896	5.64297	1.04584	0	0	0.076678	0	190.89	7.5766	5.87848e-05	0.00602886	up	yes
27294131	27312887	ENST00000348811	7	1611	MSTRG.13904	WSB1	GO:0000209(protein polyubiquitination);GO:0005515(protein binding);GO:0005622(intracellular);GO:0005829(cytosol);GO:0008150(biological_process);GO:0016567(protein ubiquitination);GO:0035556(intracellular signal transduction);GO:0043687(post-translational protein modification)	NA	K10341	NA	WD repeat and SOCS box containing 1 [Source:HGNC Symbol;Acc:HGNC:19221]	0	0	0	0	0	0	10.4545	9.92302	-inf	-inf	5.89811e-05	0.00603881	down	yes
52151308	52174481	MSTRG.20802.12	5	2719	MSTRG.20802	ZFP64	NA	NA	NA	NA	NA	4.29869	0.02038	4.12474	0.008265	0.003613	0.018508	0.001026	0	365.148	8.51234	5.9147e-05	0.00604537	up	yes
35079391	35115854	ENST00000373329	9	3980	MSTRG.729	ZMYM1	GO:0000981(DNA-binding transcription factor activity, RNA polymerase II-specific);GO:0005634(nucleus);GO:0006357(regulation of transcription by RNA polymerase II);GO:0008270(zinc ion binding);GO:0022604(regulation of cell morphogenesis);GO:0046872(metal ion binding);GO:0046983(protein dimerization activity)	NA	NA	NA	zinc finger MYM-type containing 1 [Source:HGNC Symbol;Acc:HGNC:26253]	0	0	0	0	3.78979	0	0	4.18952	-inf	-inf	5.9244e-05	0.00604537	down	yes
57648396	57710015	ENST00000341744	4	4954	MSTRG.20845	PMEPA1	GO:0000139(Golgi membrane);GO:0005515(protein binding);GO:0005768(endosome);GO:0005794(Golgi apparatus);GO:0005886(plasma membrane);GO:0009968(negative regulation of signal transduction);GO:0010008(endosome membrane);GO:0010991(negative regulation of SMAD protein complex assembly);GO:0016020(membrane);GO:0016021(integral component of membrane);GO:0030512(negative regulation of transforming growth…	NA	NA	NA	prostate transmembrane protein, androgen induced 1 [Source:HGNC Symbol;Acc:HGNC:14107]	24.4787	22.5032	27.9701	23.2342	3.51843	2.33926	2.92967	2.92849	8.38063	3.06706	5.96238e-05	0.00607113	up	yes
65706433	65733992	ENST00000485088	6	3326	MSTRG.32638	CBWD5	GO:0000166(nucleotide binding);GO:0005524(ATP binding)	NA	NA	NA	COBW domain containing 5 [Source:HGNC Symbol;Acc:HGNC:24584]	0.334758	0.642657	0.189563	0	0	0	0	0	inf	inf	5.9696e-05	0.00607113	up	yes
49587505	49605639	ENST00000257894	7	2944	MSTRG.7225	FAM186B	GO:0032991(protein-containing complex)	NA	NA	NA	family with sequence similarity 186 member B [Source:HGNC Symbol;Acc:HGNC:25296]	0	0.550568	0.281809	0.390028	0	0	0	0	inf	inf	6.01775e-05	0.00610987	up	yes
10277595	10308964	MSTRG.25743.2	7	4014	MSTRG.25743	CMBL	NA	NA	NA	NA	NA	0.005029	0.01364	0.003159	0.011197	0	5.49074	11.3792	0.004573	0.00195709	-8.99707	6.06742e-05	0.00614362	down	yes
61873527	61891381	MSTRG.5395.4	11	1527	MSTRG.5395	FADS3	NA	NA	NA	NA	NA	9.72927	0	6.73208	0	0	0	0	0	inf	inf	6.07119e-05	0.00614362	up	yes
140531421	140635546	ENST00000519980	18	3141	MSTRG.32011	AGO2	GO:0000340(RNA 7-methylguanosine cap binding);GO:0000932(P-body);GO:0000993(RNA polymerase II complex binding);GO:0001047(core promoter binding);GO:0003676(nucleic acid binding);GO:0003723(RNA binding);GO:0003725(double-stranded RNA binding);GO:0003727(single-stranded RNA binding);GO:0003729(mRNA binding);GO:0003743(translation initiation factor activity);GO:0004518(nuclease activity);GO:0004519(…	NA	K11593	NA	argonaute RISC catalytic component 2 [Source:HGNC Symbol;Acc:HGNC:3263]	0	0	0	0	4.28475	5.25554	0	0	-inf	-inf	6.08948e-05	0.00615189	down	yes
128120752	128127724	MSTRG.33260.6	7	1429	MSTRG.33260	PTGES2	NA	NA	NA	NA	NA	0	0	0	0	0	0	14.8662	8.23832	-inf	-inf	6.10322e-05	0.00615554	down	yes
89316339	89325559	ENST00000635986	14	2351	MSTRG.11525	POLG	GO:0002020(protease binding);GO:0003677(DNA binding);GO:0003682(chromatin binding);GO:0003887(DNA-directed DNA polymerase activity);GO:0005515(protein binding);GO:0005739(mitochondrion);GO:0005760(gamma DNA polymerase complex);GO:0006259(DNA metabolic process);GO:0006260(DNA replication);GO:0006261(DNA-dependent DNA replication);GO:0006264(mitochondrial DNA replication);GO:0006287(base-excision r…	NA	K02332	EC:2.7.7.7	DNA polymerase gamma, catalytic subunit [Source:HGNC Symbol;Acc:HGNC:9179]	0.353873	1.76408	1.82444	2.48012	0.078251	0.06304	0.118777	0.07727	19.0388	4.25087	6.12937e-05	0.0061678	up	yes
44562801	44620305	MSTRG.10766.4	22	5702	MSTRG.10766	SPG11	NA	NA	NA	NA	NA	0	0	1.96402	1.8213	0	0	0	0	inf	inf	6.13565e-05	0.0061678	up	yes
5105541	5112458	MSTRG.13464.4	3	2100	MSTRG.13464	ZNF232	NA	NA	NA	NA	NA	0	0	0	0	0.280817	1.01837	0.623193	0	-inf	-inf	6.1669e-05	0.00618899	down	yes
56301301	56320776	ENST00000522671	8	1988	MSTRG.31361	SDR16C5	GO:0000122(negative regulation of transcription by RNA polymerase II);GO:0000785(chromatin);GO:0003714(transcription corepressor activity);GO:0004745(retinol dehydrogenase activity);GO:0005634(nucleus);GO:0005783(endoplasmic reticulum);GO:0005789(endoplasmic reticulum membrane);GO:0005811(lipid droplet);GO:0005886(plasma membrane);GO:0008134(transcription factor binding);GO:0016020(membrane);GO:0…	00830(Retinol metabolism)	K15734	EC:1.1.1.105	short chain dehydrogenase/reductase family 16C member 5 [Source:HGNC Symbol;Acc:HGNC:30311]	0.246977	0.088716	0.155934	0.072979	2.53043	2.83182	2.66427	2.81515	0.0520774	-4.2632	6.25596e-05	0.00625861	down	yes
5384395	5419662	MSTRG.13493.4	18	2402	MSTRG.13493	NUP88	NA	NA	NA	NA	NA	0	0	0	0	8.6675	4.05234	0	0	-inf	-inf	6.25861e-05	0.00625861	down	yes
28379581	28403343	MSTRG.12372.8	20	3528	MSTRG.12372	EIF3CL	NA	NA	NA	NA	NA	4.58668	0	2.46522	0	0	0	0	0	inf	inf	6.2762e-05	0.00625861	up	yes
190514096	190519030	ENST00000465496	2	646	MSTRG.24054	IL1RAP	GO:0002114(interleukin-33 receptor activity);GO:0002376(immune system process);GO:0004908(interleukin-1 receptor activity);GO:0005515(protein binding);GO:0005576(extracellular region);GO:0005886(plasma membrane);GO:0005887(integral component of plasma membrane);GO:0006954(inflammatory response);GO:0006955(immune response);GO:0007165(signal transduction);GO:0016020(membrane);GO:0016021(integral co…	04010(MAPK signaling pathway);04060(Cytokine-cytokine receptor interaction);04659(Th17 cell differentiation);04750(Inflammatory mediator regulation of TRP channels)	K04723	NA	interleukin 1 receptor accessory protein [Source:HGNC Symbol;Acc:HGNC:5995]	0.001056	1.89877	1.6212	1.83915	0	0	0	0.001032	5193.97	12.3426	6.27744e-05	0.00625861	up	yes
27370615	27377126	MSTRG.18058.2	16	2014	MSTRG.18058	SNX17	NA	NA	NA	NA	NA	0.953859	0	2.12504	0.778385	0	0	0	0.015696	245.75	7.94105	6.29484e-05	0.00626569	up	yes
88378911	88443111	MSTRG.24909.4	23	3720	MSTRG.24909	HERC6	NA	NA	NA	NA	NA	0	0	0	0	0	4.00758	0	4.07206	-inf	-inf	6.32194e-05	0.00628238	down	yes
6373471	6375027	ENST00000596657	4	603	MSTRG.16362	ALKBH7	GO:0005739(mitochondrion);GO:0005759(mitochondrial matrix);GO:0006631(fatty acid metabolic process);GO:0006974(cellular response to DNA damage stimulus);GO:0010883(regulation of lipid storage);GO:0012501(programmed cell death);GO:0016491(oxidoreductase activity);GO:0046872(metal ion binding);GO:0051213(dioxygenase activity);GO:0055114(oxidation-reduction process);GO:1902445(regulation of mitochon…	NA	K10769	EC:1.14.11.-	alkB homolog 7 [Source:HGNC Symbol;Acc:HGNC:21306]	1.66786	3.15537	1.2677	0	0	0	0	0	inf	inf	6.3508e-05	0.00629632	up	yes
15108294	15168628	ENST00000378150	13	2457	MSTRG.3459	NMT2	GO:0004379(glycylpeptide N-tetradecanoyltransferase activity);GO:0005737(cytoplasm);GO:0005794(Golgi apparatus);GO:0005829(cytosol);GO:0005886(plasma membrane);GO:0006499(N-terminal protein myristoylation);GO:0016020(membrane);GO:0016740(transferase activity);GO:0016746(transferase activity, transferring acyl groups);GO:0018008(N-terminal peptidyl-glycine N-myristoylation);GO:0019898(extrinsic co…	NA	NA	NA	N-myristoyltransferase 2 [Source:HGNC Symbol;Acc:HGNC:7858]	0.004625	0	0	0	0	0.55801	0.778598	0.913276	0.00205566	-8.92618	6.35805e-05	0.00629632	down	yes
36572924	36677681	MSTRG.32533.17	19	3412	MSTRG.32533	MELK	NA	NA	NA	NA	NA	3.09678	3.61499	5.0656	5.48389	0.417914	0.032722	0.232136	0.02682	24.3256	4.6044	6.36703e-05	0.00629632	up	yes
152834656	152869354	MSTRG.34561.7	8	1475	MSTRG.34561	NSDHL	NA	NA	NA	NA	NA	0.021665	0.030143	4.74557	9.83019	0.022813	0.027794	0.015318	0	221.882	7.79365	6.38068e-05	0.00629957	up	yes
868396	910831	MSTRG.4749.5	15	2336	MSTRG.4749	CHID1	NA	NA	NA	NA	NA	0	0	0	0	1.52327	0	1.14907	0.023802	-inf	-inf	6.40055e-05	0.00630337	down	yes
32077309	32157079	ENST00000433497	6	3047	MSTRG.9317	ARHGAP5	GO:0003924(GTPase activity);GO:0005096(GTPase activator activity);GO:0005515(protein binding);GO:0005525(GTP binding);GO:0005737(cytoplasm);GO:0005783(endoplasmic reticulum);GO:0005829(cytosol);GO:0005886(plasma membrane);GO:0007155(cell adhesion);GO:0007165(signal transduction);GO:0007266(Rho protein signal transduction);GO:0016020(membrane);GO:0030879(mammary gland development);GO:0042169(SH2 d…	04510(Focal adhesion);04670(Leukocyte transendothelial migration)	NA	NA	Rho GTPase activating protein 5 [Source:HGNC Symbol;Acc:HGNC:675]	2.80713	0	0	5.11774	0	0	0	0	inf	inf	6.40525e-05	0.00630337	up	yes
93377871	93402706	MSTRG.7832.2	6	4738	MSTRG.7832	NUDT4	NA	NA	NA	NA	NA	0	0	0	0	0	0.621529	0	10.039	-inf	-inf	6.47685e-05	0.0063529	down	yes
120797291	120992652	ENST00000361492	13	6768	MSTRG.19011	GLI2	GO:0000122(negative regulation of transcription by RNA polymerase II);GO:0000978(RNA polymerase II proximal promoter sequence-specific DNA binding);GO:0000981(DNA-binding transcription factor activity, RNA polymerase II-specific);GO:0001228(DNA-binding transcription activator activity, RNA polymerase II-specific);GO:0001501(skeletal system development);GO:0001649(osteoblast differentiation);GO:00…	04340(Hedgehog signaling pathway);04390(Hippo signaling pathway);05200(Pathways in cancer);05217(Basal cell carcinoma)	K16798	NA	GLI family zinc finger 2 [Source:HGNC Symbol;Acc:HGNC:4318]	2.0819	1.98537	0	0	0	0	0	0	inf	inf	6.48611e-05	0.0063529	up	yes
150468195	150487667	MSTRG.19250.1	6	2682	MSTRG.19250	RND3	NA	NA	NA	NA	NA	6.72177	0	2.68922	0	0	0	0	0	inf	inf	6.49199e-05	0.0063529	up	yes
109641337	109733403	ENST00000348502	16	5032	MSTRG.34287	ACSL4	GO:0000166(nucleotide binding);GO:0001676(long-chain fatty acid metabolic process);GO:0003824(catalytic activity);GO:0004467(long-chain fatty acid-CoA ligase activity);GO:0005524(ATP binding);GO:0005737(cytoplasm);GO:0005739(mitochondrion);GO:0005741(mitochondrial outer membrane);GO:0005777(peroxisome);GO:0005778(peroxisomal membrane);GO:0005783(endoplasmic reticulum);GO:0005789(endoplasmic retic…	00061(Fatty acid biosynthesis);00071(Fatty acid degradation);03320(PPAR signaling pathway);04146(Peroxisome);04216(Ferroptosis);04714(Thermogenesis);04920(Adipocytokine signaling pathway)	K01897	EC:6.2.1.3	acyl-CoA synthetase long chain family member 4 [Source:HGNC Symbol;Acc:HGNC:3571]	0.000315	0	0.032264	0	0.217799	1.18759	0.488179	0.730339	0.0124162	-6.33163	6.50098e-05	0.0063529	down	yes
17778473	17788498	MSTRG.16779.36	9	1534	MSTRG.16779	FCHO1	NA	NA	NA	NA	NA	0	0	0	0	0.212886	1.62142	1.03001	0	-inf	-inf	6.50781e-05	0.0063529	down	yes
144435144	144456761	MSTRG.1848.8	7	1154	MSTRG.1848	NBPF15	NA	NA	NA	NA	NA	0	2.03626	0.747031	0.533855	0	0	0	0	inf	inf	6.5513e-05	0.0063851	up	yes
81035151	81109372	ENST00000572329	15	2133	MSTRG.15339	BAIAP2	GO:0001221(transcription cofactor binding);GO:0001726(ruffle);GO:0005515(protein binding);GO:0005654(nucleoplasm);GO:0005737(cytoplasm);GO:0005791(rough endoplasmic reticulum);GO:0005794(Golgi apparatus);GO:0005829(cytosol);GO:0005856(cytoskeleton);GO:0005874(microtubule);GO:0005886(plasma membrane);GO:0005913(cell-cell adherens junction);GO:0007009(plasma membrane organization);GO:0007409(axonog…	04520(Adherens junction);04810(Regulation of actin cytoskeleton)	K05627	NA	BAI1 associated protein 2 [Source:HGNC Symbol;Acc:HGNC:947]	0.006863	0.483512	0.607771	0.057296	0	0	0	0	inf	inf	6.6185e-05	0.00644027	up	yes
92883015	92899701	MSTRG.11604.8	7	2450	MSTRG.11604	AC013394	NA	NA	NA	NA	NA	4.21257	6.92049	0	0	0	0	0	0	inf	inf	6.68718e-05	0.00649672	up	yes
101391016	101395786	ENST00000372849	6	433	MSTRG.34207	RPL36A	GO:0000184(nuclear-transcribed mRNA catabolic process, nonsense-mediated decay);GO:0002181(cytoplasmic translation);GO:0003723(RNA binding);GO:0003735(structural constituent of ribosome);GO:0005515(protein binding);GO:0005622(intracellular);GO:0005737(cytoplasm);GO:0005783(endoplasmic reticulum);GO:0005829(cytosol);GO:0005840(ribosome);GO:0005886(plasma membrane);GO:0006412(translation);GO:000641…	03010(Ribosome)	K02929	NA	ribosomal protein L36a [Source:HGNC Symbol;Acc:HGNC:10359]	0	0	0	0	0	1.39454	4.63941	3.14991	-inf	-inf	6.74959e-05	0.00654689	down	yes
183555563	183590604	ENST00000413720	14	2276	MSTRG.2587	NCF2	GO:0001669(acrosomal vesicle);GO:0002479(antigen processing and presentation of exogenous peptide antigen via MHC class I, TAP-dependent);GO:0005515(protein binding);GO:0005730(nucleolus);GO:0005737(cytoplasm);GO:0005829(cytosol);GO:0006801(superoxide metabolic process);GO:0006909(phagocytosis);GO:0006968(cellular defense response);GO:0008022(protein C-terminus binding);GO:0009055(electron transf…	04145(Phagosome);04380(Osteoclast differentiation);04670(Leukocyte transendothelial migration);05140(Leishmaniasis);05418(Fluid shear stress and atherosclerosis)	K08010	NA	neutrophil cytosolic factor 2 [Source:HGNC Symbol;Acc:HGNC:7661]	0	0	0	0	0.027242	0	1.5495	1.12052	-inf	-inf	6.78148e-05	0.00656734	down	yes
73674285	73698159	ENST00000581191	8	2779	MSTRG.4033	AGAP5	GO:0005096(GTPase activator activity);GO:0005515(protein binding);GO:0005634(nucleus);GO:0043547(positive regulation of GTPase activity);GO:0046872(metal ion binding)	NA	NA	NA	ArfGAP with GTPase domain, ankyrin repeat and PH domain 5 [Source:HGNC Symbol;Acc:HGNC:23467]	0.920607	0.961804	0	0.781565	0.006992	0.007611	0.015376	0.010493	65.8227	6.04051	6.81096e-05	0.00657687	up	yes
114120862	114174203	ENST00000369287	16	7228	MSTRG.4504	CCDC186	GO:0009617(response to bacterium)	NA	NA	NA	coiled-coil domain containing 186 [Source:HGNC Symbol;Acc:HGNC:24349]	0	0	1.11637	1.55619	0	0	0	0	inf	inf	6.81295e-05	0.00657687	up	yes
109929804	109996304	ENST00000361006	19	5444	MSTRG.8050	GIT2	GO:0005096(GTPase activator activity);GO:0005515(protein binding);GO:0005654(nucleoplasm);GO:0005925(focal adhesion);GO:0008277(regulation of G protein-coupled receptor signaling pathway);GO:0016301(kinase activity);GO:0016310(phosphorylation);GO:0043547(positive regulation of GTPase activity);GO:0046872(metal ion binding)	04144(Endocytosis)	K12487	NA	GIT ArfGAP 2 [Source:HGNC Symbol;Acc:HGNC:4273]	0	0.569142	3.07278	0.151848	0.005689	0	0	0	666.861	9.38124	6.87067e-05	0.00662208	up	yes
10106395	10114738	ENST00000393796	13	2385	MSTRG.16474	PPAN-P2RY11	GO:0000027(ribosomal large subunit assembly);GO:0004930(G protein-coupled receptor activity);GO:0007165(signal transduction);GO:0007186(G protein-coupled receptor signaling pathway);GO:0016020(membrane);GO:0016021(integral component of membrane);GO:0030687(preribosome, large subunit precursor);GO:0035589(G protein-coupled purinergic nucleotide receptor signaling pathway);GO:0045028(G protein-coup…	NA	K14859	NA	PPAN-P2RY11 readthrough [Source:HGNC Symbol;Acc:HGNC:33526]	0	0	0	0	4.73151	0	0	6.21008	-inf	-inf	6.95997e-05	0.00669144	down	yes
3902216	3903784	MSTRG.27415.1	1	1569	MSTRG.27415	AL590004	NA	NA	NA	NA	NA	1.3314	1.59349	1.60687	1.67225	0.173863	0.107943	0.044235	0.060073	16.0678	4.0061	6.96558e-05	0.00669144	up	yes
218607855	218636648	ENST00000483685	12	2452	MSTRG.19920	PLCD4	GO:0004435(phosphatidylinositol phospholipase C activity);GO:0004629(phospholipase C activity);GO:0005509(calcium ion binding);GO:0005622(intracellular);GO:0005634(nucleus);GO:0005737(cytoplasm);GO:0005783(endoplasmic reticulum);GO:0005789(endoplasmic reticulum membrane);GO:0005829(cytosol);GO:0005886(plasma membrane);GO:0006629(lipid metabolic process);GO:0007165(signal transduction);GO:0007340(…	00562(Inositol phosphate metabolism);04020(Calcium signaling pathway);04070(Phosphatidylinositol signaling system);04919(Thyroid hormone signaling pathway);04933(AGE-RAGE signaling pathway in diabetic complications)	K05857	EC:3.1.4.11	phospholipase C delta 4 [Source:HGNC Symbol;Acc:HGNC:9062]	0	0	0	0	0	0.369391	0.749124	0.410531	-inf	-inf	6.97563e-05	0.00669144	down	yes
14478246	14496132	ENST00000586027	8	1386	MSTRG.16666	GIPC1	GO:0003779(actin binding);GO:0005102(signaling receptor binding);GO:0005515(protein binding);GO:0005737(cytoplasm);GO:0005829(cytosol);GO:0005903(brush border);GO:0005938(cell cortex);GO:0006605(protein targeting);GO:0007186(G protein-coupled receptor signaling pathway);GO:0007268(chemical synaptic transmission);GO:0008021(synaptic vesicle);GO:0012506(vesicle membrane);GO:0014047(glutamate secret…	NA	K20056	NA	GIPC PDZ domain containing family member 1 [Source:HGNC Symbol;Acc:HGNC:1226]	20.2889	0	0	2.49886	0	0	0	0	inf	inf	7.00474e-05	0.00670224	up	yes
30545999	30571231	MSTRG.27852.5	12	2064	MSTRG.27852	GNL1	NA	NA	NA	NA	NA	0	0.075593	0	0	20.6762	0.079908	0.109444	16.6235	0.0020164	-8.954	7.00957e-05	0.00670224	down	yes
47941781	47947411	ENST00000641703	5	1131	MSTRG.14654	PNPO	GO:0004733(pyridoxamine-phosphate oxidase activity);GO:0005515(protein binding);GO:0005654(nucleoplasm);GO:0005829(cytosol);GO:0008615(pyridoxine biosynthetic process);GO:0010181(FMN binding);GO:0016491(oxidoreductase activity);GO:0016638(oxidoreductase activity, acting on the CH-NH2 group of donors);GO:0030170(pyridoxal phosphate binding);GO:0042803(protein homodimerization activity);GO:0042816(…	00750(Vitamin B6 metabolism)	K00275	EC:1.4.3.5	pyridoxamine 5'-phosphate oxidase [Source:HGNC Symbol;Acc:HGNC:30260]	0	0	0	0	0	12.9208	9.39215	0	-inf	-inf	7.01995e-05	0.00670224	down	yes
20082340	20091204	MSTRG.21590.6	4	5443	MSTRG.21590	DGCR8	NA	NA	NA	NA	NA	1.88378	0	1.83855	0	0	0	0	0	inf	inf	7.05605e-05	0.00672614	up	yes
107628510	107650469	ENST00000372418	6	1414	MSTRG.34268	PRPS1	GO:0000166(nucleotide binding);GO:0000287(magnesium ion binding);GO:0002189(ribose phosphate diphosphokinase complex);GO:0004749(ribose phosphate diphosphokinase activity);GO:0005515(protein binding);GO:0005524(ATP binding);GO:0005737(cytoplasm);GO:0005829(cytosol);GO:0006015(5-phosphoribose 1-diphosphate biosynthetic process);GO:0006144(purine nucleobase metabolic process);GO:0006164(purine nucl…	00030(Pentose phosphate pathway);00230(Purine metabolism)	K00948	EC:2.7.6.1	phosphoribosyl pyrophosphate synthetase 1 [Source:HGNC Symbol;Acc:HGNC:9462]	0	0	9.11315	4.50713	0	0	0	0	inf	inf	7.09068e-05	0.00674858	up	yes
49818342	49836962	ENST00000538643	13	1623	MSTRG.17556	MED25	GO:0000122(negative regulation of transcription by RNA polymerase II);GO:0005515(protein binding);GO:0005634(nucleus);GO:0005654(nucleoplasm);GO:0006367(transcription initiation from RNA polymerase II promoter);GO:0008134(transcription factor binding);GO:0016592(mediator complex);GO:0035563(positive regulation of chromatin binding);GO:0042974(retinoic acid receptor binding);GO:0044798(nuclear tra…	NA	K15168	NA	mediator complex subunit 25 [Source:HGNC Symbol;Acc:HGNC:28845]	0	0	0	0	0	5.63021	10.2853	0	-inf	-inf	7.10675e-05	0.0067533	down	yes
129087575	129161036	ENST00000418265	13	4868	MSTRG.23387	ISY1-RAB43	GO:0000350(generation of catalytic spliceosome for second transesterification step)	03040(Spliceosome)	K12870	NA	ISY1-RAB43 readthrough [Source:HGNC Symbol;Acc:HGNC:42969]	0	0	0	0	0	1.89835	0	3.6117	-inf	-inf	7.1441e-05	0.00675693	down	yes
11089463	11131538	ENST00000535915	17	2768	MSTRG.16533	LDLR	GO:0001540(amyloid-beta binding);GO:0001618(virus receptor activity);GO:0002020(protease binding);GO:0005041(low-density lipoprotein particle receptor activity);GO:0005509(calcium ion binding);GO:0005515(protein binding);GO:0005623(cell);GO:0005764(lysosome);GO:0005768(endosome);GO:0005769(early endosome);GO:0005770(late endosome);GO:0005794(Golgi apparatus);GO:0005886(plasma membrane);GO:0005887…	04144(Endocytosis);04913(Ovarian steroidogenesis);04925(Aldosterone synthesis and secretion);04927(Cortisol synthesis and secretion);04934(Cushing syndrome);04976(Bile secretion);04979(Cholesterol metabolism);05145(Toxoplasmosis);05160(Hepatitis C)	K12473	NA	low density lipoprotein receptor [Source:HGNC Symbol;Acc:HGNC:6547]	0	0	0	0	5.24824	0	3.81385	0	-inf	-inf	7.14904e-05	0.00675693	down	yes
68038004	68079242	ENST00000561965	14	1712	MSTRG.12846	DUS2	GO:0002943(tRNA dihydrouridine synthesis);GO:0003723(RNA binding);GO:0003725(double-stranded RNA binding);GO:0003824(catalytic activity);GO:0004860(protein kinase inhibitor activity);GO:0005515(protein binding);GO:0005737(cytoplasm);GO:0005783(endoplasmic reticulum);GO:0005829(cytosol);GO:0006469(negative regulation of protein kinase activity);GO:0008033(tRNA processing);GO:0016491(oxidoreductase…	NA	K05543	EC:1.3.1.91	dihydrouridine synthase 2 [Source:HGNC Symbol;Acc:HGNC:26014]	0	0	0	0	0	7.93485	6.65218	0	-inf	-inf	7.15139e-05	0.00675693	down	yes
27022550	27034331	MSTRG.6938.2	4	4492	MSTRG.6938	MED21	NA	NA	NA	NA	NA	0.001454	0	0.000512	3.8e-05	1.7e-05	0.490263	0.000399	2.60459	0.000647439	-10.593	7.16198e-05	0.00675693	down	yes
177426794	177442901	ENST00000393576	16	2792	MSTRG.27242	GRK6	GO:0000166(nucleotide binding);GO:0004672(protein kinase activity);GO:0004674(protein serine/threonine kinase activity);GO:0004703(G protein-coupled receptor kinase activity);GO:0005515(protein binding);GO:0005524(ATP binding);GO:0005886(plasma membrane);GO:0006468(protein phosphorylation);GO:0007165(signal transduction);GO:0007186(G protein-coupled receptor signaling pathway);GO:0008277(regulati…	04062(Chemokine signaling pathway);04144(Endocytosis);05032(Morphine addiction)	NA	NA	G protein-coupled receptor kinase 6 [Source:HGNC Symbol;Acc:HGNC:4545]	0.006695	0.037938	0.039289	0.005698	2.65129	3.41486	1.06298	0.008246	0.0125564	-6.31543	7.17044e-05	0.00675693	down	yes
82627039	83651552	MSTRG.13124.13	9	1239	MSTRG.13124	CDH13	NA	NA	NA	NA	NA	8.31745	0	0	8.06112	0	0	0	0	inf	inf	7.18383e-05	0.00675693	up	yes
7835994	7854784	MSTRG.13570.2	24	6768	MSTRG.13570	KDM6B	NA	NA	NA	NA	NA	0.666864	0.08806	0.081926	3.60686	0.018652	0.019189	0.02737	0.029075	47.1301	5.55858	7.18834e-05	0.00675693	up	yes
25377245	25673647	ENST00000288642	20	2464	MSTRG.18011	DTNB	GO:0005515(protein binding);GO:0005737(cytoplasm);GO:0008270(zinc ion binding);GO:0046872(metal ion binding)	NA	NA	NA	dystrobrevin beta [Source:HGNC Symbol;Acc:HGNC:3058]	1.4548	1.59851	0.016773	0.106417	0.023333	0.005357	0	0.0074	88.016	6.45969	7.21022e-05	0.00676703	up	yes
122752847	122771064	MSTRG.8280.5	9	2640	MSTRG.8280	DENR	NA	NA	NA	NA	NA	7.24559	0	1.81091	0	0	0	0	0	inf	inf	7.23327e-05	0.00677821	up	yes
6852148	6863916	MSTRG.6622.2	16	2000	MSTRG.6622	USP5	NA	NA	NA	NA	NA	4.04272	0	5.86582	0	0	0	0	0	inf	inf	7.27131e-05	0.00680337	up	yes
8424168	8438994	MSTRG.16437.11	4	1126	MSTRG.16437	MARCH2	NA	NA	NA	NA	NA	1.61668	1.79123	2.01921	0.014007	0	0	0.041875	0	129.938	7.02167	7.30641e-05	0.00682238	up	yes
31320547	31524007	ENST00000558655	8	2773	MSTRG.3638	ZEB1	GO:0000122(negative regulation of transcription by RNA polymerase II);GO:0000981(DNA-binding transcription factor activity, RNA polymerase II-specific);GO:0001227(DNA-binding transcription repressor activity, RNA polymerase II-specific);GO:0003676(nucleic acid binding);GO:0003677(DNA binding);GO:0003682(chromatin binding);GO:0003700(DNA-binding transcription factor activity);GO:0003713(transcript…	05202(Transcriptional misregulation in cancer);05206(MicroRNAs in cancer);05215(Prostate cancer)	K09299	NA	zinc finger E-box binding homeobox 1 [Source:HGNC Symbol;Acc:HGNC:11642]	0.477166	0.029665	0.937901	1.1014	0.018721	0.027037	0.016402	0.03476	26.2705	4.71537	7.31406e-05	0.00682238	up	yes
40457877	40462368	ENST00000479563	5	794	MSTRG.22609	RPL14	GO:0000184(nuclear-transcribed mRNA catabolic process, nonsense-mediated decay);GO:0003723(RNA binding);GO:0003735(structural constituent of ribosome);GO:0005515(protein binding);GO:0005622(intracellular);GO:0005829(cytosol);GO:0005840(ribosome);GO:0006364(rRNA processing);GO:0006412(translation);GO:0006413(translational initiation);GO:0006614(SRP-dependent cotranslational protein targeting to me…	03010(Ribosome)	NA	NA	ribosomal protein L14 [Source:HGNC Symbol;Acc:HGNC:10305]	165.153	143.234	14.5441	203.104	10.6403	10.6249	9.6287	11.8202	12.3153	3.62238	7.35811e-05	0.00683493	up	yes
31532316	31545714	ENST00000504464	7	914	MSTRG.25842	C5orf22	GO:0005515(protein binding)	NA	NA	NA	chromosome 5 open reading frame 22 [Source:HGNC Symbol;Acc:HGNC:25639]	0	1.29492	0.65176	1.85467	0	0	0	0	inf	inf	7.36171e-05	0.00683493	up	yes
68248051	68257127	ENST00000359783	6	1722	MSTRG.15073	AMZ2	GO:0005575(cellular_component);GO:0006508(proteolysis);GO:0008233(peptidase activity);GO:0008237(metallopeptidase activity);GO:0008270(zinc ion binding);GO:0016787(hydrolase activity);GO:0046872(metal ion binding)	NA	K06974	EC:3.4.-.-	archaelysin family metallopeptidase 2 [Source:HGNC Symbol;Acc:HGNC:28041]	0	0	0	0	0	9.45375	0	5.08797	-inf	-inf	7.36222e-05	0.00683493	down	yes
116687577	116701298	MSTRG.33119.4	2	3723	MSTRG.33119	TRIM32	NA	NA	NA	NA	NA	1.74879	0	0.009558	0.40781	0	0	0.002201	0	984.169	9.94276	7.37247e-05	0.00683493	up	yes
27225025	27268733	MSTRG.12319.3	9	1184	MSTRG.12319	NSMCE1	NA	NA	NA	NA	NA	0	0	0	0	10.137	0	10.2092	0	-inf	-inf	7.42478e-05	0.00687295	down	yes
89327997	89340968	ENST00000371818	2	2390	MSTRG.4205	IFIT3	GO:0002376(immune system process);GO:0003674(molecular_function);GO:0005515(protein binding);GO:0005737(cytoplasm);GO:0005739(mitochondrion);GO:0005829(cytosol);GO:0008285(negative regulation of cell population proliferation);GO:0009615(response to virus);GO:0035457(cellular response to interferon-alpha);GO:0042802(identical protein binding);GO:0043066(negative regulation of apoptotic process);GO…	NA	NA	NA	interferon induced protein with tetratricopeptide repeats 3 [Source:HGNC Symbol;Acc:HGNC:5411]	3.79327	3.84948	2.94348	2.66566	31.1716	29.0438	32.9394	33.1963	0.104881	-3.25317	7.51477e-05	0.00694568	down	yes
64003024	64226430	MSTRG.9729.6	85	19534	MSTRG.9729	SYNE2	NA	NA	NA	NA	NA	0.100818	0.063462	0.108458	0.11505	3.23011	2.84818	0.421111	0.355905	0.0565676	-4.14388	7.52839e-05	0.00694771	down	yes
1442162	1466905	ENST00000555944	8	2588	MSTRG.20197	NSFL1C	GO:0000045(autophagosome assembly);GO:0000132(establishment of mitotic spindle orientation);GO:0005515(protein binding);GO:0005543(phospholipid binding);GO:0005634(nucleus);GO:0005654(nucleoplasm);GO:0005694(chromosome);GO:0005737(cytoplasm);GO:0005794(Golgi apparatus);GO:0005795(Golgi stack);GO:0005815(microtubule organizing center);GO:0005829(cytosol);GO:0005856(cytoskeleton);GO:0005886(plasma …	04141(Protein processing in endoplasmic reticulum)	K14012	NA	NSFL1 cofactor [Source:HGNC Symbol;Acc:HGNC:15912]	0	0	0.017051	0	0	7.86584	4.44811	0.622106	0.0013181	-9.56733	7.54253e-05	0.00695021	down	yes
76216468	76311466	ENST00000560726	10	942	MSTRG.11304	ETFA	GO:0005515(protein binding);GO:0005739(mitochondrion);GO:0005759(mitochondrial matrix);GO:0009055(electron transfer activity);GO:0016491(oxidoreductase activity);GO:0022900(electron transport chain);GO:0022904(respiratory electron transport chain);GO:0033539(fatty acid beta-oxidation using acyl-CoA dehydrogenase);GO:0050660(flavin adenine dinucleotide binding);GO:0055114(oxidation-reduction proce…	NA	K03522	NA	electron transfer flavoprotein subunit alpha [Source:HGNC Symbol;Acc:HGNC:3481]	0	0	0	0	1.60778	0.842222	1.277	0	-inf	-inf	7.57502e-05	0.00696959	down	yes
28721255	28753297	MSTRG.12346.15	15	4886	MSTRG.12346	EIF3C	NA	NA	NA	NA	NA	9e-06	0.514845	0	5.61373	0	0	0	0	inf	inf	7.60399e-05	0.00698568	up	yes
180494565	180578353	MSTRG.27323.12	12	6054	MSTRG.27323	CNOT6	NA	NA	NA	NA	NA	0	0	0.013832	0	0.003718	2.05664	0.15813	2.56048	0.00289435	-8.43255	7.66291e-05	0.00702919	down	yes
22206326	22265245	ENST00000568269	13	2367	MSTRG.12230	EEF2K	GO:0000166(nucleotide binding);GO:0002931(response to ischemia);GO:0004672(protein kinase activity);GO:0004674(protein serine/threonine kinase activity);GO:0004686(elongation factor-2 kinase activity);GO:0005509(calcium ion binding);GO:0005515(protein binding);GO:0005516(calmodulin binding);GO:0005524(ATP binding);GO:0005737(cytoplasm);GO:0005829(cytosol);GO:0006414(translational elongation);GO:0…	04152(AMPK signaling pathway);04921(Oxytocin signaling pathway)	K08292	EC:2.7.11.20	eukaryotic elongation factor 2 kinase [Source:HGNC Symbol;Acc:HGNC:24615]	0.307037	0.383399	0.218367	0.340467	0.618182	8.06799	8.0737	9.33895	0.0478669	-4.38483	7.72057e-05	0.00707141	down	yes
25696767	25734972	MSTRG.21155.1	7	734	MSTRG.21155	ATP5PF	NA	NA	NA	NA	NA	0.002532	0	0	0	0.890339	3.42644	3.14596	0	0.000339286	-11.5252	7.8551e-05	0.00718382	down	yes
25592812	25607484	ENST00000419219	8	900	MSTRG.21151	MRPL39	GO:0000166(nucleotide binding);GO:0003723(RNA binding);GO:0005739(mitochondrion);GO:0005743(mitochondrial inner membrane);GO:0005761(mitochondrial ribosome);GO:0005762(mitochondrial large ribosomal subunit);GO:0005840(ribosome);GO:0070125(mitochondrial translational elongation);GO:0070126(mitochondrial translational termination)	NA	K17420	NA	mitochondrial ribosomal protein L39 [Source:HGNC Symbol;Acc:HGNC:14027]	0	0	7.91856	8.88274	0	0	0	0	inf	inf	7.92199e-05	0.00723411	up	yes
60183186	60391928	MSTRG.14888.4	31	4040	MSTRG.14888	USP32	NA	NA	NA	NA	NA	0	0	0	0	0	2.49414	0	3.01147	-inf	-inf	7.93509e-05	0.0072352	down	yes
1445344	1475057	ENST00000262318	24	3717	MSTRG.11771	CLCN7	GO:0000166(nucleotide binding);GO:0005247(voltage-gated chloride channel activity);GO:0005254(chloride channel activity);GO:0005515(protein binding);GO:0005524(ATP binding);GO:0005654(nucleoplasm);GO:0005764(lysosome);GO:0005765(lysosomal membrane);GO:0006811(ion transport);GO:0006821(chloride transport);GO:0009268(response to pH);GO:0015297(antiporter activity);GO:0016020(membrane);GO:0016021(in…	NA	NA	NA	chloride voltage-gated channel 7 [Source:HGNC Symbol;Acc:HGNC:2025]	0	0	1.86165	2.19066	0	0	0	0	inf	inf	7.9492e-05	0.00723723	up	yes
97674909	97697293	ENST00000462523	7	1584	MSTRG.32928	XPA	GO:0000110(nucleotide-excision repair factor 1 complex);GO:0000715(nucleotide-excision repair, DNA damage recognition);GO:0000717(nucleotide-excision repair, DNA duplex unwinding);GO:0003677(DNA binding);GO:0003684(damaged DNA binding);GO:0005515(protein binding);GO:0005634(nucleus);GO:0005654(nucleoplasm);GO:0005662(DNA replication factor A complex);GO:0005737(cytoplasm);GO:0006281(DNA repair);G…	01524(Platinum drug resistance);03420(Nucleotide excision repair)	K10847	NA	XPA, DNA damage recognition and repair factor [Source:HGNC Symbol;Acc:HGNC:12814]	0	0	0	0	0.515539	0.687913	0.993842	0	-inf	-inf	8.00619e-05	0.00727821	down	yes
40953471	40956512	ENST00000617768	3	1520	MSTRG.10629	CHAC1	GO:0003839(gamma-glutamylcyclotransferase activity);GO:0005112(Notch binding);GO:0005515(protein binding);GO:0005737(cytoplasm);GO:0005794(Golgi apparatus);GO:0005802(trans-Golgi network);GO:0005829(cytosol);GO:0006750(glutathione biosynthetic process);GO:0006751(glutathione catabolic process);GO:0006915(apoptotic process);GO:0006986(response to unfolded protein);GO:0007219(Notch signaling pathwa…	00480(Glutathione metabolism)	K07232	EC:4.3.2.7	ChaC glutathione specific gamma-glutamylcyclotransferase 1 [Source:HGNC Symbol;Acc:HGNC:28680]	19.3522	15.435	21.5347	18.1935	0.771375	0	1.03889	0.952842	26.968	4.75317	8.03758e-05	0.0072891	up	yes
30063130	30082971	MSTRG.31156.5	6	1792	MSTRG.31156	SARAF	NA	NA	NA	NA	NA	0	0	0	0	0	5.55783	6.6563	0	-inf	-inf	8.04214e-05	0.0072891	down	yes
37906147	38129020	MSTRG.33823.6	17	5302	MSTRG.33823	SYTL5	NA	NA	NA	NA	NA	1.49728	0	1.7162	0	0	0	0	0	inf	inf	8.07197e-05	0.00729326	up	yes
16232633	16294799	ENST00000575225	31	3765	MSTRG.12127	NOMO3	GO:0003674(molecular_function);GO:0005575(cellular_component);GO:0005789(endoplasmic reticulum membrane);GO:0008150(biological_process);GO:0016020(membrane);GO:0016021(integral component of membrane);GO:0030246(carbohydrate binding)	NA	NA	NA	NODAL modulator 3 [Source:HGNC Symbol;Acc:HGNC:25242]	4.61001	0	0	1.18274	0	0	0	0	inf	inf	8.0853e-05	0.00729326	up	yes
63970029	63989371	ENST00000353706	7	3387	MSTRG.16032	SERPINB8	GO:0004867(serine-type endopeptidase inhibitor activity);GO:0005515(protein binding);GO:0005615(extracellular space);GO:0005737(cytoplasm);GO:0005829(cytosol);GO:0010466(negative regulation of peptidase activity);GO:0010951(negative regulation of endopeptidase activity);GO:0030414(peptidase inhibitor activity);GO:0062023(collagen-containing extracellular matrix);GO:0070062(extracellular exosome);…	NA	K13965	NA	serpin family B member 8 [Source:HGNC Symbol;Acc:HGNC:8952]	0	0	0	0	0	5.01137	0	2.04335	-inf	-inf	8.09793e-05	0.00729326	down	yes
46956622	46973664	ENST00000563158	9	1825	MSTRG.12571	DNAJA2	GO:0001671(ATPase activator activity);GO:0005515(protein binding);GO:0005524(ATP binding);GO:0005829(cytosol);GO:0006457(protein folding);GO:0008284(positive regulation of cell population proliferation);GO:0009408(response to heat);GO:0016020(membrane);GO:0031072(heat shock protein binding);GO:0032781(positive regulation of ATPase activity);GO:0042026(protein refolding);GO:0046872(metal ion bindi…	04141(Protein processing in endoplasmic reticulum)	K09503	NA	DnaJ heat shock protein family (Hsp40) member A2 [Source:HGNC Symbol;Acc:HGNC:14884]	0	0	0	0	0	5.74839	6.10079	0	-inf	-inf	8.09936e-05	0.00729326	down	yes
126423177	126494161	ENST00000542322	15	2977	MSTRG.26702	GRAMD2B	GO:0005515(protein binding);GO:0005881(cytoplasmic microtubule);GO:0016020(membrane);GO:0016021(integral component of membrane);GO:0042802(identical protein binding)	NA	NA	NA	GRAM domain containing 2B [Source:HGNC Symbol;Acc:HGNC:24911]	2.59701	0	3.07501	0	0	0	0	0	inf	inf	8.10669e-05	0.00729326	up	yes
161879604	161881621	MSTRG.23740.1	1	2018	MSTRG.23740	.	NA	NA	NA	NA	NA	0.048244	0.052725	0.01991	0.09943	0.655529	0.634543	1.26213	0.974012	0.0624775	-4.00052	8.14106e-05	0.0073109	down	yes
112452058	112477200	ENST00000535603	12	3397	MSTRG.30413	IFRD1	GO:0005634(nucleus);GO:0005737(cytoplasm);GO:0007275(multicellular organism development);GO:0007518(myoblast fate determination);GO:0014706(striated muscle tissue development);GO:0030154(cell differentiation);GO:0030517(negative regulation of axon extension);GO:0042692(muscle cell differentiation);GO:0043403(skeletal muscle tissue regeneration);GO:0048671(negative regulation of collateral sprouti…	NA	NA	NA	interferon related developmental regulator 1 [Source:HGNC Symbol;Acc:HGNC:5456]	0	3.03661	0	2.46435	0	0	0	0	inf	inf	8.15033e-05	0.0073109	up	yes
111726914	111766427	MSTRG.6212.2	17	5034	MSTRG.6212	PPP2R1B	NA	NA	NA	NA	NA	2.34086	0	0	1.28807	0	0	0	0	inf	inf	8.16607e-05	0.00731423	up	yes
11553047	11559236	MSTRG.16549.6	5	987	MSTRG.16549	ELOF1	NA	NA	NA	NA	NA	0	0	0	0	11.1404	9.55856	0	0	-inf	-inf	8.21912e-05	0.00731689	down	yes
126423472	126493326	ENST00000513978	15	1847	MSTRG.26702	GRAMD2B	GO:0005515(protein binding);GO:0005881(cytoplasmic microtubule);GO:0016020(membrane);GO:0016021(integral component of membrane);GO:0042802(identical protein binding)	NA	NA	NA	GRAM domain containing 2B [Source:HGNC Symbol;Acc:HGNC:24911]	9.09282	0	2.25046	0	0	0	0	0	inf	inf	8.22245e-05	0.00731689	up	yes
88049014	88141307	ENST00000309041	53	7616	MSTRG.7790	CEP290	GO:0000086(G2/M transition of mitotic cell cycle);GO:0000930(gamma-tubulin complex);GO:0005515(protein binding);GO:0005576(extracellular region);GO:0005634(nucleus);GO:0005737(cytoplasm);GO:0005813(centrosome);GO:0005814(centriole);GO:0005815(microtubule organizing center);GO:0005829(cytosol);GO:0005856(cytoskeleton);GO:0005929(cilium);GO:0010389(regulation of G2/M transition of mitotic cell cycl…	NA	K16533	NA	centrosomal protein 290 [Source:HGNC Symbol;Acc:HGNC:29021]	0	1.15205	0	1.23136	0	0	0	0	inf	inf	8.22435e-05	0.00731689	up	yes
15536981	15563536	ENST00000438826	7	1852	MSTRG.13677	TVP23C	GO:0009306(protein secretion);GO:0016020(membrane);GO:0016021(integral component of membrane);GO:0016192(vesicle-mediated transport);GO:0030173(integral component of Golgi membrane)	NA	NA	NA	trans-golgi network vesicle protein 23 homolog C [Source:HGNC Symbol;Acc:HGNC:30453]	0	0	0	0	0.055993	2.29407	0	0.583	-inf	-inf	8.22961e-05	0.00731689	down	yes
207579003	207603431	MSTRG.19830.16	2	6579	MSTRG.19830	CREB1	NA	NA	NA	NA	NA	1.3331	0.537455	0.005337	0.004702	0.004165	0.003529	0.003007	0.000563	166.956	7.38332	8.23118e-05	0.00731689	up	yes
128787349	128810424	ENST00000223865	10	3378	MSTRG.33296	TBC1D13	GO:0005096(GTPase activator activity);GO:0005737(cytoplasm);GO:0005829(cytosol);GO:0006886(intracellular protein transport);GO:0016020(membrane);GO:0017137(Rab GTPase binding);GO:0043547(positive regulation of GTPase activity);GO:0090630(activation of GTPase activity)	NA	NA	NA	TBC1 domain family member 13 [Source:HGNC Symbol;Acc:HGNC:25571]	0	0	0	0	0	3.09836	0	3.11529	-inf	-inf	8.24123e-05	0.00731689	down	yes
10973907	11169623	MSTRG.29373.7	17	3346	MSTRG.29373	PHF14	NA	NA	NA	NA	NA	2.23411	0	0	2.8405	0	0	0	0	inf	inf	8.25487e-05	0.00731831	up	yes
30938941	30991628	ENST00000435680	16	4985	MSTRG.10398	MTMR10	GO:0005737(cytoplasm);GO:0005829(cytosol)	NA	K18085	NA	myotubularin related protein 10 [Source:HGNC Symbol;Acc:HGNC:25999]	0.000445	0.004346	0.004504	0.004732	0.309838	0.377192	0.005805	0.344377	0.0135238	-6.20836	8.34449e-05	0.007387	down	yes
62662848	62671540	ENST00000532208	7	1508	MSTRG.5435	LBHD1	NA	NA	NA	NA	LBH domain containing 1 [Source:HGNC Symbol;Acc:HGNC:28351]	0	0	5.8166	3.6541	0	0	0	0	inf	inf	8.39071e-05	0.00741712	up	yes
48831214	48838061	MSTRG.7176.3	12	1763	MSTRG.7176	DDX23	NA	NA	NA	NA	NA	0.036479	1.20889	1.2571	2.14134	0.04849	0.035165	0.02277	0.061916	27.5857	4.78585	8.45191e-05	0.00746038	up	yes
134025495	134030277	MSTRG.33432.3	4	3869	MSTRG.33432	BRD3OS	NA	NA	NA	NA	NA	2.61563	0	1.57029	0	0	0	0	0	inf	inf	8.50534e-05	0.0074952	up	yes
171317405	171434802	ENST00000612742	10	8132	MSTRG.19432	METTL8	GO:0004402(histone acetyltransferase activity);GO:0005634(nucleus);GO:0005737(cytoplasm);GO:0007519(skeletal muscle tissue development);GO:0008168(methyltransferase activity);GO:0008174(mRNA methyltransferase activity);GO:0016573(histone acetylation);GO:0016740(transferase activity);GO:0030488(tRNA methylation);GO:0032259(methylation);GO:0045444(fat cell differentiation);GO:0052735(tRNA (cytosine…	NA	NA	NA	methyltransferase like 8 [Source:HGNC Symbol;Acc:HGNC:25856]	0.382676	1.34319	0.000289	0.001191	0.000388	0.000984	0.002071	0.000609	426.294	8.7357	8.51602e-05	0.0074952	up	yes
6452042	6462316	ENST00000266556	7	1781	MSTRG.6602	TAPBPL	GO:0000139(Golgi membrane);GO:0002376(immune system process);GO:0002502(peptide antigen assembly with MHC class I protein complex);GO:0002590(negative regulation of antigen processing and presentation of peptide antigen via MHC class I);GO:0005515(protein binding);GO:0005783(endoplasmic reticulum);GO:0005789(endoplasmic reticulum membrane);GO:0005794(Golgi apparatus);GO:0005886(plasma membrane);G…	NA	NA	NA	TAP binding protein like [Source:HGNC Symbol;Acc:HGNC:30683]	0	0	0	0	0	0.59367	0.478073	0.847048	-inf	-inf	8.55867e-05	0.00751181	down	yes
62516369	62546806	MSTRG.5421.27	7	13566	MSTRG.5421	AHNAK	NA	NA	NA	NA	NA	0	0	0	0	0	0.462123	0	1.19234	-inf	-inf	8.55959e-05	0.00751181	down	yes
50355476	50371636	MSTRG.10826.7	2	15211	MSTRG.10826	GABPB1-AS1	NA	NA	NA	NA	NA	0	0.000507	0.006699	0.000192	1.01111	0.713467	0.003276	0.00901	0.0042594	-7.87514	8.58879e-05	0.00752657	down	yes
23084023	23133679	MSTRG.464.4	5	8609	MSTRG.464	LUZP1	NA	NA	NA	NA	NA	0.012129	0.004859	0.002363	0.016331	2.62358	1.06256	0.01921	0.010354	0.00960301	-6.7023	8.64134e-05	0.00756173	down	yes
55395963	55425804	ENST00000508404	7	1657	MSTRG.24701	TMEM165	GO:0000139(Golgi membrane);GO:0005764(lysosome);GO:0005765(lysosomal membrane);GO:0005768(endosome);GO:0005794(Golgi apparatus);GO:0006487(protein N-linked glycosylation);GO:0006874(cellular calcium ion homeostasis);GO:0010008(endosome membrane);GO:0016020(membrane);GO:0016021(integral component of membrane);GO:0031901(early endosome membrane);GO:0031902(late endosome membrane);GO:0032472(Golgi c…	NA	NA	NA	transmembrane protein 165 [Source:HGNC Symbol;Acc:HGNC:30760]	0.237586	0.564925	0.432662	1.7548	0.027874	0	0	0.020271	62.1035	5.9566	8.66799e-05	0.00757415	up	yes
154582067	154606300	ENST00000648231	15	6700	MSTRG.2183	ADAR	GO:0001649(osteoblast differentiation);GO:0002244(hematopoietic progenitor cell differentiation);GO:0002376(immune system process);GO:0002566(somatic diversification of immune receptors via somatic mutation);GO:0003677(DNA binding);GO:0003723(RNA binding);GO:0003725(double-stranded RNA binding);GO:0003726(double-stranded RNA adenosine deaminase activity);GO:0004000(adenosine deaminase activity);G…	04623(Cytosolic DNA-sensing pathway);05162(Measles);05164(Influenza A)	NA	NA	adenosine deaminase, RNA specific [Source:HGNC Symbol;Acc:HGNC:225]	0	0	0	0	5.44103	0	0.288366	0	-inf	-inf	8.79255e-05	0.00767198	down	yes
102769218	102912387	MSTRG.34228.5	11	2800	MSTRG.34228	LINC00630	NA	NA	NA	NA	NA	0.000256	0.618337	0.297039	0.744685	0	0	0.005262	0	315.53	8.30163	8.83006e-05	0.00768457	up	yes
181223290	181235803	MSTRG.27340.4	8	2697	MSTRG.27340	TRIM41	NA	NA	NA	NA	NA	0	0	0	0	0	1.97237	0	6.56274	-inf	-inf	8.83226e-05	0.00768457	down	yes
25294164	25338283	MSTRG.513.19	2	1821	MSTRG.513	RSRP1	NA	NA	NA	NA	NA	0.320097	0.919483	0	0.600851	0	0	0	0	inf	inf	8.85854e-05	0.00769321	up	yes
100466538	100479169	MSTRG.30210.6	5	1409	MSTRG.30210	TSC22D4	NA	NA	NA	NA	NA	0	0	0	0	8.64144	5.0618	0	0	-inf	-inf	8.86748e-05	0.00769321	down	yes
67312005	67359804	MSTRG.9767.2	11	1667	MSTRG.9767	ATP6V1D	NA	NA	NA	NA	NA	0	0	0	0	5.36168	0	0	6.27119	-inf	-inf	8.90726e-05	0.00771671	down	yes
129608975	129635473	MSTRG.33334.2	4	875	MSTRG.33334	NTMT1	NA	NA	NA	NA	NA	1.6687	0	0.11381	3.3796	0	0	0	0	inf	inf	8.99797e-05	0.0077842	up	yes
114440671	114450261	ENST00000546316	5	726	MSTRG.6263	REXO2	GO:0000175(3'-5'-exoribonuclease activity);GO:0003676(nucleic acid binding);GO:0004518(nuclease activity);GO:0004527(exonuclease activity);GO:0005634(nucleus);GO:0005730(nucleolus);GO:0005737(cytoplasm);GO:0005739(mitochondrion);GO:0005758(mitochondrial intermembrane space);GO:0005759(mitochondrial matrix);GO:0005925(focal adhesion);GO:0006139(nucleobase-containing compound metabolic process);GO:…	03008(Ribosome biogenesis in eukaryotes)	K13288	EC:3.1.-.-	RNA exonuclease 2 [Source:HGNC Symbol;Acc:HGNC:17851]	0	0	0	0	11.844	0	14.1775	0	-inf	-inf	9.03199e-05	0.00780253	down	yes
141952496	142101338	MSTRG.23560.7	13	1496	MSTRG.23560	TFDP2	NA	NA	NA	NA	NA	0.019822	0	0.005524	0.020589	2.29118	2.78066	0.057992	0.022912	0.00891466	-6.8096	9.10418e-05	0.00784875	down	yes
29871168	29895863	MSTRG.12404.6	14	2901	MSTRG.12404	SEZ6L2	NA	NA	NA	NA	NA	0.02998	0	0	0	0.992328	0.308199	0.041026	6.72419	0.00371696	-8.07166	9.1113e-05	0.00784875	down	yes
6613304	6616479	ENST00000643342	6	2007	MSTRG.4920	TPP1	GO:0004175(endopeptidase activity);GO:0004252(serine-type endopeptidase activity);GO:0005515(protein binding);GO:0005764(lysosome);GO:0006508(proteolysis);GO:0006629(lipid metabolic process);GO:0007040(lysosome organization);GO:0007399(nervous system development);GO:0007417(central nervous system development);GO:0008233(peptidase activity);GO:0008236(serine-type peptidase activity);GO:0008240(tri…	04142(Lysosome)	NA	NA	tripeptidyl peptidase 1 [Source:HGNC Symbol;Acc:HGNC:2073]	0	0	0	0	4.46061	4.46497	0	0	-inf	-inf	9.13414e-05	0.0078573	down	yes
79612435	79686266	ENST00000504233	14	2997	MSTRG.26336	TENT2	GO:0000166(nucleotide binding);GO:0002244(hematopoietic progenitor cell differentiation);GO:0004652(polynucleotide adenylyltransferase activity);GO:0005515(protein binding);GO:0005524(ATP binding);GO:0005634(nucleus);GO:0005737(cytoplasm);GO:0005829(cytosol);GO:0006397(mRNA processing);GO:0016740(transferase activity);GO:0021766(hippocampus development);GO:0030182(neuron differentiation);GO:00313…	NA	K14079	EC:2.7.7.19	terminal nucleotidyltransferase 2 [Source:HGNC Symbol;Acc:HGNC:26776]	0	0	0	0	3.28015	0	0	2.87816	-inf	-inf	9.15124e-05	0.00786089	down	yes
124115454	124124833	MSTRG.6404.7	11	2892	MSTRG.6404	VWA5A	NA	NA	NA	NA	NA	0	0	0	0	0	0	3.50157	2.86213	-inf	-inf	9.34171e-05	0.00801318	down	yes
44565837	44573664	ENST00000467318	13	1665	MSTRG.29712	DDX56	GO:0000166(nucleotide binding);GO:0003676(nucleic acid binding);GO:0003723(RNA binding);GO:0004004(ATP-dependent RNA helicase activity);GO:0004386(helicase activity);GO:0005524(ATP binding);GO:0005634(nucleus);GO:0005730(nucleolus);GO:0006364(rRNA processing);GO:0010976(positive regulation of neuron projection development);GO:0016020(membrane);GO:0016787(hydrolase activity);GO:0042254(ribosome bi…	NA	K14810	EC:3.6.4.13	DEAD-box helicase 56 [Source:HGNC Symbol;Acc:HGNC:18193]	0	0	2.46173	5.06319	0	0	0	0	inf	inf	9.36811e-05	0.00801818	up	yes
231206239	231374837	ENST00000611582	24	5759	MSTRG.20011	ARMC9	GO:0005515(protein binding);GO:0005737(cytoplasm);GO:0005856(cytoskeleton);GO:0030030(cell projection organization);GO:0036064(ciliary basal body);GO:0042995(cell projection);GO:0060271(cilium assembly);GO:0070062(extracellular exosome)	NA	K22864	NA	armadillo repeat containing 9 [Source:HGNC Symbol;Acc:HGNC:20730]	0	0	0.749925	1.28293	0	0	0	0	inf	inf	9.37473e-05	0.00801818	up	yes
108665069	108940918	ENST00000648124	20	3400	MSTRG.6178	DDX10	GO:0000166(nucleotide binding);GO:0003676(nucleic acid binding);GO:0003723(RNA binding);GO:0003724(RNA helicase activity);GO:0004386(helicase activity);GO:0005524(ATP binding);GO:0016787(hydrolase activity);GO:0097065(anterior head development)	NA	K14776	EC:3.6.4.13	DEAD-box helicase 10 [Source:HGNC Symbol;Acc:HGNC:2735]	0.019038	6.85136	0.01321	2.74519	0.011424	0.027848	0.026691	0.00972	127.225	6.99124	9.39476e-05	0.00801818	up	yes
112562072	112584156	ENST00000261034	8	2444	MSTRG.23178	SLC35A5	GO:0000139(Golgi membrane);GO:0005794(Golgi apparatus);GO:0008643(carbohydrate transport);GO:0015136(sialic acid transmembrane transporter activity);GO:0015165(pyrimidine nucleotide-sugar transmembrane transporter activity);GO:0016020(membrane);GO:0016021(integral component of membrane);GO:0030173(integral component of Golgi membrane);GO:0090481(pyrimidine nucleotide-sugar transmembrane transport)	NA	K15274	NA	solute carrier family 35 member A5 [Source:HGNC Symbol;Acc:HGNC:20792]	0	0	1.88467	2.6172	0	0	0	0	inf	inf	9.40027e-05	0.00801818	up	yes
70719531	70856037	MSTRG.26199.4	9	3894	MSTRG.26199	AC139272	NA	NA	NA	NA	NA	0	0	0	0	2.69125	0	0	1.93778	-inf	-inf	9.44669e-05	0.00803848	down	yes
13110186	13116027	ENST00000587633	6	648	MSTRG.16625	TRMT1	GO:0000049(tRNA binding);GO:0002940(tRNA N2-guanine methylation);GO:0003723(RNA binding);GO:0004809(tRNA (guanine-N2-)-methyltransferase activity);GO:0005515(protein binding);GO:0005634(nucleus);GO:0005654(nucleoplasm);GO:0006400(tRNA modification);GO:0008033(tRNA processing);GO:0008168(methyltransferase activity);GO:0016740(transferase activity);GO:0030488(tRNA methylation);GO:0032259(methylatio…	NA	K00555	2.1.1.216;EC:2.1.1.215	tRNA methyltransferase 1 [Source:HGNC Symbol;Acc:HGNC:25980]	0	0	0	0	2.2746	0	0.885895	2.09132	-inf	-inf	9.4505e-05	0.00803848	down	yes
133454853	133571925	MSTRG.31974.3	8	6069	MSTRG.31974	ST3GAL1	NA	NA	NA	NA	NA	0	0	0	0	0	0	1.38643	1.5366	-inf	-inf	9.47058e-05	0.00804431	down	yes
11106535	11262169	MSTRG.272.1	58	8770	MSTRG.272	MTOR	NA	NA	NA	NA	NA	0.826132	0.007008	0.003105	2.77628	0.006259	0.003457	0.005564	0.012214	131.393	7.03775	9.4948e-05	0.00805137	up	yes
134442386	134459102	ENST00000434222	10	1852	MSTRG.30606	AKR1B1	GO:0001523(retinoid metabolic process);GO:0001758(retinal dehydrogenase activity);GO:0001894(tissue homeostasis);GO:0003091(renal water homeostasis);GO:0004032(alditol:NADP+ 1-oxidoreductase activity);GO:0005615(extracellular space);GO:0005654(nucleoplasm);GO:0005737(cytoplasm);GO:0005829(cytosol);GO:0005975(carbohydrate metabolic process);GO:0005996(monosaccharide metabolic process);GO:0006061(s…	00040(Pentose and glucuronate interconversions);00051(Fructose and mannose metabolism);00052(Galactose metabolism);00561(Glycerolipid metabolism);00790(Folate biosynthesis)	NA	NA	aldo-keto reductase family 1 member B [Source:HGNC Symbol;Acc:HGNC:381]	0	0	0	0	4.00099	5.04057	0	0	-inf	-inf	9.50538e-05	0.00805137	down	yes
148532118	148679757	MSTRG.2022.13	28	16174	MSTRG.2022	NBPF14	NA	NA	NA	NA	NA	0	0	0	0	0.019181	0.049135	0.192428	0	-inf	-inf	9.54223e-05	0.00805413	down	yes
75416786	75525955	MSTRG.29994.1	23	6715	MSTRG.29994	POM121C	NA	NA	NA	NA	NA	1.08919	0	0	0.8588	0	0	0	0	inf	inf	9.54691e-05	0.00805413	up	yes
132483086	132490262	ENST00000405885	10	2061	MSTRG.26761	IRF1	GO:0000790(nuclear chromatin);GO:0000978(RNA polymerase II proximal promoter sequence-specific DNA binding);GO:0000981(DNA-binding transcription factor activity, RNA polymerase II-specific);GO:0001228(DNA-binding transcription activator activity, RNA polymerase II-specific);GO:0002376(immune system process);GO:0002819(regulation of adaptive immune response);GO:0003677(DNA binding);GO:0003700(DNA-…	04625(C-type lectin receptor signaling pathway);04668(TNF signaling pathway);04917(Prolactin signaling pathway);05133(Pertussis);05165(Human papillomavirus infection)	K09444	NA	interferon regulatory factor 1 [Source:HGNC Symbol;Acc:HGNC:6116]	0	0	0	0	0	4.45245	0	3.7163	-inf	-inf	9.55983e-05	0.00805413	down	yes
100376433	100530271	ENST00000554998	7	1952	MSTRG.10172	WDR25	GO:0005515(protein binding)	NA	NA	NA	WD repeat domain 25 [Source:HGNC Symbol;Acc:HGNC:21064]	1.91017	0	6.17289	0	0	0	0	0	inf	inf	9.56416e-05	0.00805413	up	yes
3252275	3256235	ENST00000580887	4	899	MSTRG.15511	MYL12A	GO:0005509(calcium ion binding);GO:0005515(protein binding);GO:0005829(cytosol);GO:0006936(muscle contraction);GO:0016459(myosin complex);GO:0046872(metal ion binding);GO:0070062(extracellular exosome);GO:0070527(platelet aggregation)	04360(Axon guidance);04510(Focal adhesion);04530(Tight junction);04611(Platelet activation);04670(Leukocyte transendothelial migration);04810(Regulation of actin cytoskeleton)	K12757	NA	myosin light chain 12A [Source:HGNC Symbol;Acc:HGNC:16701]	7.37982	0	6.51429	0	0	0	0	0	inf	inf	9.57485e-05	0.00805413	up	yes
43076342	43161712	ENST00000349241	17	3801	MSTRG.28187	PTK7	GO:0001736(establishment of planar polarity);GO:0001843(neural tube closure);GO:0003281(ventricular septum development);GO:0003401(axis elongation);GO:0004672(protein kinase activity);GO:0005515(protein binding);GO:0005524(ATP binding);GO:0005886(plasma membrane);GO:0005887(integral component of plasma membrane);GO:0005911(cell-cell junction);GO:0005925(focal adhesion);GO:0006468(protein phosphor…	NA	NA	NA	protein tyrosine kinase 7 (inactive) [Source:HGNC Symbol;Acc:HGNC:9618]	0	0	1.12189	1.26056	0	0	0	0	inf	inf	9.59531e-05	0.0080602	up	yes
58408664	58427114	ENST00000556007	5	746	MSTRG.9660	TIMM9	GO:0005215(transporter activity);GO:0005515(protein binding);GO:0005739(mitochondrion);GO:0005743(mitochondrial inner membrane);GO:0005758(mitochondrial intermembrane space);GO:0006626(protein targeting to mitochondrion);GO:0007605(sensory perception of sound);GO:0008270(zinc ion binding);GO:0015031(protein transport);GO:0016020(membrane);GO:0042719(mitochondrial intermembrane space protein trans…	NA	K17777	NA	translocase of inner mitochondrial membrane 9 [Source:HGNC Symbol;Acc:HGNC:11819]	9.4307	0	0	7.80206	0	0	0	0	inf	inf	9.61044e-05	0.00806177	up	yes
1784010	1788969	ENST00000568706	6	913	MSTRG.11805	NUBP2	GO:0000166(nucleotide binding);GO:0005515(protein binding);GO:0005524(ATP binding);GO:0005634(nucleus);GO:0005737(cytoplasm);GO:0005814(centriole);GO:0005815(microtubule organizing center);GO:0005829(cytosol);GO:0005856(cytoskeleton);GO:0005929(cilium);GO:0016226(iron-sulfur cluster assembly);GO:0030030(cell projection organization);GO:0031616(spindle pole centrosome);GO:0042995(cell projection);…	NA	NA	NA	nucleotide binding protein 2 [Source:HGNC Symbol;Acc:HGNC:8042]	0	0	3.15816	13.0333	0	0	0	0	inf	inf	9.66616e-05	0.00808948	up	yes
109656252	109661700	ENST00000495742	7	1159	MSTRG.1657	GSTM4	GO:0004364(glutathione transferase activity);GO:0005515(protein binding);GO:0005737(cytoplasm);GO:0005829(cytosol);GO:0006749(glutathione metabolic process);GO:0016740(transferase activity);GO:0018916(nitrobenzene metabolic process);GO:0019899(enzyme binding);GO:0042178(xenobiotic catabolic process);GO:0042759(long-chain fatty acid biosynthetic process);GO:0042803(protein homodimerization activit…	00480(Glutathione metabolism);00980(Metabolism of xenobiotics by cytochrome P450);00982(Drug metabolism - cytochrome P450);00983(Drug metabolism - other enzymes);01524(Platinum drug resistance);05200(Pathways in cancer);05204(Chemical carcinogenesis);05225(Hepatocellular carcinoma);05418(Fluid shear stress and atherosclerosis)	K00799	EC:2.5.1.18	glutathione S-transferase mu 4 [Source:HGNC Symbol;Acc:HGNC:4636]	0	6.34006	5.08748	0	0	0	0	0	inf	inf	9.67008e-05	0.00808948	up	yes
3218302	3526001	ENST00000617270	17	9253	MSTRG.32191	RFX3	GO:0000790(nuclear chromatin);GO:0000978(RNA polymerase II proximal promoter sequence-specific DNA binding);GO:0000981(DNA-binding transcription factor activity, RNA polymerase II-specific);GO:0003677(DNA binding);GO:0003700(DNA-binding transcription factor activity);GO:0005515(protein binding);GO:0005634(nucleus);GO:0005667(transcription factor complex);GO:0006351(transcription, DNA-templated);G…	NA	K09173	NA	regulatory factor X3 [Source:HGNC Symbol;Acc:HGNC:9984]	0	0.727319	0.676439	0	0	0	0	0	inf	inf	9.68515e-05	0.00809096	up	yes
3897949	3901956	MSTRG.27412.1	1	4008	MSTRG.27412	.	NA	NA	NA	NA	NA	1.4027	1.33935	1.44737	1.23478	0.055479	0.137116	0.092355	0.094613	14.2906	3.837	9.76586e-05	0.00813662	up	yes
48615331	48619181	ENST00000552588	6	559	MSTRG.17489	RPL18	GO:0000184(nuclear-transcribed mRNA catabolic process, nonsense-mediated decay);GO:0002181(cytoplasmic translation);GO:0003723(RNA binding);GO:0003735(structural constituent of ribosome);GO:0005622(intracellular);GO:0005634(nucleus);GO:0005730(nucleolus);GO:0005737(cytoplasm);GO:0005783(endoplasmic reticulum);GO:0005791(rough endoplasmic reticulum);GO:0005829(cytosol);GO:0005840(ribosome);GO:0005…	03010(Ribosome)	K02883	NA	ribosomal protein L18 [Source:HGNC Symbol;Acc:HGNC:10310]	0	12.2143	10.7797	0	0	0	0	0	inf	inf	9.76657e-05	0.00813662	up	yes
113325062	113355436	ENST00000326039	5	1294	MSTRG.9131	GRTP1	GO:0005096(GTPase activator activity);GO:0005623(cell);GO:0006886(intracellular protein transport);GO:0017137(Rab GTPase binding);GO:0090630(activation of GTPase activity)	NA	K19953	NA	growth hormone regulated TBC protein 1 [Source:HGNC Symbol;Acc:HGNC:20310]	0	0	0	0	0	0.653108	0.816329	1.01841	-inf	-inf	9.84771e-05	0.0081903	down	yes
45584045	45615354	ENST00000453748	12	2080	MSTRG.975	NASP	GO:0000082(G1/S transition of mitotic cell cycle);GO:0000790(nuclear chromatin);GO:0001824(blastocyst development);GO:0005515(protein binding);GO:0005634(nucleus);GO:0005654(nucleoplasm);GO:0005737(cytoplasm);GO:0006260(DNA replication);GO:0006335(DNA replication-dependent nucleosome assembly);GO:0006336(DNA replication-independent nucleosome assembly);GO:0007049(cell cycle);GO:0008283(cell popul…	NA	K11291	NA	nuclear autoantigenic sperm protein [Source:HGNC Symbol;Acc:HGNC:7644]	0	0	0	0	0.719856	0.340903	0	0.486131	-inf	-inf	9.85793e-05	0.0081903	down	yes
90998675	91022513	ENST00000574755	22	2356	MSTRG.11592	VPS33B	GO:0005515(protein binding);GO:0005737(cytoplasm);GO:0005764(lysosome);GO:0005765(lysosomal membrane);GO:0005768(endosome);GO:0005769(early endosome);GO:0005770(late endosome);GO:0005794(Golgi apparatus);GO:0006904(vesicle docking involved in exocytosis);GO:0007032(endosome organization);GO:0015031(protein transport);GO:0016020(membrane);GO:0016192(vesicle-mediated transport);GO:0017185(peptidyl-…	NA	K23281	NA	VPS33B, late endosome and lysosome associated [Source:HGNC Symbol;Acc:HGNC:12712]	0	0	0	0	3.56638	0	3.32569	0	-inf	-inf	9.88648e-05	0.00819278	down	yes
224114119	224158182	ENST00000523990	4	1415	MSTRG.2996	FBXO28	GO:0000775(chromosome, centromeric region);GO:0000776(kinetochore);GO:0000777(condensed chromosome kinetochore);GO:0005515(protein binding);GO:0005694(chromosome)	NA	K10306	NA	F-box protein 28 [Source:HGNC Symbol;Acc:HGNC:29046]	0	0	0	0	0	0	6.10803	5.61507	-inf	-inf	9.88786e-05	0.00819278	down	yes
43591021	43622283	ENST00000412568	25	4154	MSTRG.892	PTPRF	GO:0004721(phosphoprotein phosphatase activity);GO:0004725(protein tyrosine phosphatase activity);GO:0005001(transmembrane receptor protein tyrosine phosphatase activity);GO:0005515(protein binding);GO:0005886(plasma membrane);GO:0005887(integral component of plasma membrane);GO:0006470(protein dephosphorylation);GO:0007155(cell adhesion);GO:0007185(transmembrane receptor protein tyrosine phospha…	04514(Cell adhesion molecules (CAMs));04520(Adherens junction);04910(Insulin signaling pathway);04931(Insulin resistance)	K05695	EC:3.1.3.48	protein tyrosine phosphatase, receptor type F [Source:HGNC Symbol;Acc:HGNC:9670]	0	0	0	0	0	0	2.18379	1.8204	-inf	-inf	9.91028e-05	0.00819744	down	yes
14741279	14771126	MSTRG.6812.1	3	1496	MSTRG.6812	HIST4H4	NA	NA	NA	NA	NA	49.7812	0	0.129678	43.1232	0.066464	0	0.071568	0	674.004	9.39661	9.94092e-05	0.00819744	up	yes
29807137	29811192	MSTRG.12416.1	2	1026	MSTRG.12416	AC009133	NA	NA	NA	NA	NA	22.7831	0	1.70081	0	0	0	0	0	inf	inf	9.95524e-05	0.00819744	up	yes
34525654	34588431	MSTRG.10470.35	25	4863	MSTRG.10470	GOLGA8B	NA	NA	NA	NA	NA	1.03215	0.000925	1.13839	0	0.001324	0	0	0	1640.07	10.6795	9.96485e-05	0.00819744	up	yes
92487457	92528435	ENST00000428214	23	3681	MSTRG.30102	PEX1	GO:0000166(nucleotide binding);GO:0005515(protein binding);GO:0005524(ATP binding);GO:0005737(cytoplasm);GO:0005777(peroxisome);GO:0005778(peroxisomal membrane);GO:0005829(cytosol);GO:0006625(protein targeting to peroxisome);GO:0007031(peroxisome organization);GO:0008022(protein C-terminus binding);GO:0015031(protein transport);GO:0016020(membrane);GO:0016558(protein import into peroxisome matrix…	04146(Peroxisome)	K13338	NA	peroxisomal biogenesis factor 1 [Source:HGNC Symbol;Acc:HGNC:8850]	0	0	0	0	0	2.37938	0	2.00155	-inf	-inf	9.97247e-05	0.00819744	down	yes
43477523	43506556	ENST00000436109	9	2572	MSTRG.28200	TJAP1	GO:0005515(protein binding);GO:0005737(cytoplasm);GO:0005768(endosome);GO:0005794(Golgi apparatus);GO:0005802(trans-Golgi network);GO:0005886(plasma membrane);GO:0005923(bicellular tight junction);GO:0007030(Golgi organization);GO:0030054(cell junction)	04530(Tight junction)	K06105	NA	tight junction associated protein 1 [Source:HGNC Symbol;Acc:HGNC:17949]	0	0	0	0	2.86072	3.07031	0	0	-inf	-inf	9.99262e-05	0.00819744	down	yes
16475443	16623988	MSTRG.350.1	3	256	MSTRG.350	AL137802	NA	NA	NA	NA	NA	25.7732	0	0	21.1685	0	0	0	0	inf	inf	9.99382e-05	0.00819744	up	yes
4833400	4898054	ENST00000347992	32	4863	MSTRG.13456	MINK1	GO:0000165(MAPK cascade);GO:0000166(nucleotide binding);GO:0001952(regulation of cell-matrix adhesion);GO:0004672(protein kinase activity);GO:0004674(protein serine/threonine kinase activity);GO:0005515(protein binding);GO:0005524(ATP binding);GO:0005737(cytoplasm);GO:0005794(Golgi apparatus);GO:0005829(cytosol);GO:0005886(plasma membrane);GO:0006468(protein phosphorylation);GO:0007254(JNK cascad…	NA	K04413	EC:2.7.11.1	misshapen like kinase 1 [Source:HGNC Symbol;Acc:HGNC:17565]	0	0	0	0	0	2.49071	1.11749	0	-inf	-inf	0.000100025	0.00819744	down	yes
42782792	42834094	MSTRG.3727.3	22	6845	MSTRG.3727	BMS1	NA	NA	NA	NA	NA	0	0	0	0	0	1.2504	0	1.05228	-inf	-inf	0.000100148	0.00819744	down	yes
38556866	38566147	MSTRG.25942.2	2	2852	MSTRG.25942	LIFR-AS1	NA	NA	NA	NA	NA	0.070652	0.008354	0.027377	0.045066	0.403093	2.00872	0.521742	0.565962	0.0432771	-4.53025	0.000100805	0.00822318	down	yes
100802565	100827115	ENST00000360620	16	3789	MSTRG.30231	EPHB4	GO:0000166(nucleotide binding);GO:0001525(angiogenesis);GO:0002042(cell migration involved in sprouting angiogenesis);GO:0003007(heart morphogenesis);GO:0004672(protein kinase activity);GO:0004713(protein tyrosine kinase activity);GO:0004714(transmembrane receptor protein tyrosine kinase activity);GO:0005003(ephrin receptor activity);GO:0005005(transmembrane-ephrin receptor activity);GO:0005515(p…	04360(Axon guidance)	K05113	EC:2.7.10.1	EPH receptor B4 [Source:HGNC Symbol;Acc:HGNC:3395]	0	0	0	0	0	0	7.07551	0.685976	-inf	-inf	0.000100812	0.00822318	down	yes
3736057	3746715	ENST00000650545	6	2408	MSTRG.162	TP73-AS1	NA	NA	NA	NA	TP73 antisense RNA 1 [Source:HGNC Symbol;Acc:HGNC:29052]	0	0.047991	1.78081	1.68338	0.008712	0	0	0	403.143	8.65515	0.000100868	0.00822318	up	yes
71032670	71067601	ENST00000274400	16	4336	MSTRG.26209	GTF2H2	GO:0000438(core TFIIH complex portion of holo TFIIH complex);GO:0000439(transcription factor TFIIH core complex);GO:0000717(nucleotide-excision repair, DNA duplex unwinding);GO:0002031(G protein-coupled receptor internalization);GO:0003676(nucleic acid binding);GO:0004672(protein kinase activity);GO:0005515(protein binding);GO:0005634(nucleus);GO:0005654(nucleoplasm);GO:0005669(transcription fact…	03022(Basal transcription factors);03420(Nucleotide excision repair);05203(Viral carcinogenesis)	K03142	NA	general transcription factor IIH subunit 2 [Source:HGNC Symbol;Acc:HGNC:4656]	0	0	0	0	0	0	1.96655	1.69437	-inf	-inf	0.000101253	0.00824348	down	yes
177519791	177536390	ENST00000510163	8	2237	MSTRG.27251	FAM193B	GO:0005634(nucleus);GO:0005654(nucleoplasm);GO:0005730(nucleolus);GO:0005737(cytoplasm)	NA	NA	NA	family with sequence similarity 193 member B [Source:HGNC Symbol;Acc:HGNC:25524]	0	0.569773	0.359409	0.371109	0	0	0	0	inf	inf	0.000101954	0.00828125	up	yes
94656370	94669692	MSTRG.30165.3	3	5130	MSTRG.30165	PEG10	NA	NA	NA	NA	NA	0	0	0	0	2.47676	0	0.992408	0	-inf	-inf	0.000102077	0.00828125	down	yes
145214851	145215905	ENST00000638358	1	1055	MSTRG.1866	AC241585	NA	NA	NA	NA	TEC	0	6.1373	5.05281	0	0	0	0	0	inf	inf	0.000102125	0.00828125	up	yes
1663782	1746059	MSTRG.126.24	13	4852	MSTRG.126	SLC35E2B	NA	NA	NA	NA	NA	0	4.64022	0	0.394463	0	0	0	0	inf	inf	0.000102667	0.0083141	up	yes
165989869	166036274	ENST00000637038	12	4268	MSTRG.19404	SCN1A	GO:0001508(action potential);GO:0001518(voltage-gated sodium channel complex);GO:0005216(ion channel activity);GO:0005244(voltage-gated ion channel activity);GO:0005248(voltage-gated sodium channel activity);GO:0005272(sodium channel activity);GO:0005654(nucleoplasm);GO:0005886(plasma membrane);GO:0006811(ion transport);GO:0006814(sodium ion transport);GO:0007628(adult walking behavior);GO:001470…	04728(Dopaminergic synapse)	K04833	NA	sodium voltage-gated channel alpha subunit 1 [Source:HGNC Symbol;Acc:HGNC:10585]	0.013628	0.011901	0.01188	0.00587	1.11434	0.021446	0.915275	0.041707	0.0206803	-5.5956	0.000104616	0.00845284	down	yes
7591230	7594332	MSTRG.13562.1	9	1781	MSTRG.13562	FXR2	NA	NA	NA	NA	NA	3.06537	0	2.85004	0	0	0	0	0	inf	inf	0.000104697	0.00845284	up	yes
28553920	28604679	MSTRG.12335.2	11	1317	MSTRG.12335	SGF29	NA	NA	NA	NA	NA	0	0	1.96588	4.59624	0	0	0	0	inf	inf	0.000104797	0.00845284	up	yes
66975277	66977004	ENST00000308963	2	1187	MSTRG.5629	C11orf86	NA	NA	NA	NA	chromosome 11 open reading frame 86 [Source:HGNC Symbol;Acc:HGNC:34442]	0.359327	0.688512	0.639672	1.17962	11.1899	12.5895	10.2712	8.09168	0.0680347	-3.87759	0.000105614	0.00850749	down	yes
570018	584109	ENST00000026218	10	2846	MSTRG.11716	PIGQ	GO:0000506(glycosylphosphatidylinositol-N-acetylglucosaminyltransferase (GPI-GnT) complex);GO:0005789(endoplasmic reticulum membrane);GO:0005975(carbohydrate metabolic process);GO:0006506(GPI anchor biosynthetic process);GO:0016020(membrane);GO:0016021(integral component of membrane);GO:0016254(preassembly of GPI anchor in ER membrane);GO:0016740(transferase activity);GO:0016757(transferase activ…	00563(Glycosylphosphatidylinositol (GPI)-anchor biosynthesis)	K03860	NA	phosphatidylinositol glycan anchor biosynthesis class Q [Source:HGNC Symbol;Acc:HGNC:14135]	0	1.7205	2.10004	0	0	0	0	0	inf	inf	0.000106235	0.00854614	up	yes
28190427	28550166	ENST00000539107	12	2440	MSTRG.6964	CCDC91	GO:0005654(nucleoplasm);GO:0005794(Golgi apparatus);GO:0005802(trans-Golgi network);GO:0005829(cytosol);GO:0015031(protein transport);GO:0016020(membrane);GO:0042802(identical protein binding);GO:0048193(Golgi vesicle transport);GO:0090160(Golgi to lysosome transport)	NA	NA	NA	coiled-coil domain containing 91 [Source:HGNC Symbol;Acc:HGNC:24855]	0	2.266	2.16614	0	0	0	0	0	inf	inf	0.000106621	0.00856592	up	yes
61802218	61817162	MSTRG.5402.6	13	2046	MSTRG.5402	FADS1	NA	NA	NA	NA	NA	0	0	0	0	0.392154	19.9758	0	0	-inf	-inf	0.000107889	0.00863233	down	yes
117199321	117204557	ENST00000392951	5	928	MSTRG.6280	TAGLN	GO:0003779(actin binding);GO:0005515(protein binding);GO:0005737(cytoplasm);GO:0007517(muscle organ development);GO:0030855(epithelial cell differentiation);GO:0051015(actin filament binding)	NA	K20526	NA	transgelin [Source:HGNC Symbol;Acc:HGNC:11553]	16.4129	24.3555	18.1237	15.6124	1.88711	1.64186	1.60108	1.77806	10.7851	3.43096	0.000107981	0.00863233	up	yes
169394228	169612627	ENST00000512193	33	4430	MSTRG.25534	NEK1	GO:0000166(nucleotide binding);GO:0000242(pericentriolar material);GO:0004672(protein kinase activity);GO:0004674(protein serine/threonine kinase activity);GO:0004713(protein tyrosine kinase activity);GO:0005515(protein binding);GO:0005524(ATP binding);GO:0005634(nucleus);GO:0005737(cytoplasm);GO:0005813(centrosome);GO:0005815(microtubule organizing center);GO:0005856(cytoskeleton);GO:0006468(pro…	NA	K08857	EC:2.7.11.1	NIMA related kinase 1 [Source:HGNC Symbol;Acc:HGNC:7744]	0	0	0	0	0	1.21315	0	1.9741	-inf	-inf	0.000108067	0.00863233	down	yes
41613476	41697483	ENST00000508466	21	3051	MSTRG.24562	LIMCH1	GO:0001725(stress fiber);GO:0001934(positive regulation of protein phosphorylation);GO:0003779(actin binding);GO:0005515(protein binding);GO:0005737(cytoplasm);GO:0005856(cytoskeleton);GO:0016460(myosin II complex);GO:0030336(negative regulation of cell migration);GO:0031032(actomyosin structure organization);GO:0032034(myosin II head/neck binding);GO:0046872(metal ion binding);GO:0051496(positiv…	NA	NA	NA	LIM and calponin homology domains 1 [Source:HGNC Symbol;Acc:HGNC:29191]	2.28373	0	0	1.27271	0	0	0	0	inf	inf	0.000108275	0.00863233	up	yes
128480146	128487916	ENST00000430265	6	2525	MSTRG.23361	GATA2	GO:0000122(negative regulation of transcription by RNA polymerase II);GO:0000978(RNA polymerase II proximal promoter sequence-specific DNA binding);GO:0000980(RNA polymerase II distal enhancer sequence-specific DNA binding);GO:0000981(DNA-binding transcription factor activity, RNA polymerase II-specific);GO:0001158(enhancer sequence-specific DNA binding);GO:0001228(DNA-binding transcription activ…	NA	NA	NA	GATA binding protein 2 [Source:HGNC Symbol;Acc:HGNC:4171]	0	0	0	0	3.84843	0	0	2.04435	-inf	-inf	0.000108425	0.00863233	down	yes
4750814	4767216	ENST00000545009	7	2440	MSTRG.11985	ZNF500	GO:0000981(DNA-binding transcription factor activity, RNA polymerase II-specific);GO:0003676(nucleic acid binding);GO:0003677(DNA binding);GO:0003700(DNA-binding transcription factor activity);GO:0005622(intracellular);GO:0005634(nucleus);GO:0005654(nucleoplasm);GO:0005829(cytosol);GO:0006355(regulation of transcription, DNA-templated);GO:0006357(regulation of transcription by RNA polymerase II);…	NA	K09229	NA	zinc finger protein 500 [Source:HGNC Symbol;Acc:HGNC:23716]	0	1.67062	0	2.28099	0	0	0	0	inf	inf	0.000108439	0.00863233	up	yes
99793343	99941537	ENST00000334192	23	4064	MSTRG.10146	EML1	GO:0000226(microtubule cytoskeleton organization);GO:0002244(hematopoietic progenitor cell differentiation);GO:0005509(calcium ion binding);GO:0005515(protein binding);GO:0005737(cytoplasm);GO:0005829(cytosol);GO:0005856(cytoskeleton);GO:0005874(microtubule);GO:0005875(microtubule associated complex);GO:0007052(mitotic spindle organization);GO:0007405(neuroblast proliferation);GO:0007420(brain de…	NA	NA	NA	EMAP like 1 [Source:HGNC Symbol;Acc:HGNC:3330]	0.823944	0	1.33145	0	0	0	0	0	inf	inf	0.000108442	0.00863233	up	yes
6984227	6997765	MSTRG.20996.16	2	9544	MSTRG.20996	CU634019	NA	NA	NA	NA	NA	0	0.577273	0	0.512216	0	0	0	0	inf	inf	0.000108895	0.00865194	up	yes
41431988	41439539	ENST00000417807	6	1065	MSTRG.17262	DMAC2	GO:0004842(ubiquitin-protein transferase activity);GO:0005739(mitochondrion);GO:0005747(mitochondrial respiratory chain complex I);GO:0006511(ubiquitin-dependent protein catabolic process);GO:0016567(protein ubiquitination);GO:0019005(SCF ubiquitin ligase complex);GO:0031146(SCF-dependent proteasomal ubiquitin-dependent protein catabolic process);GO:0032981(mitochondrial respiratory chain complex…	NA	NA	NA	distal membrane arm assembly complex 2 [Source:HGNC Symbol;Acc:HGNC:25496]	0	4.0101	5.99317	0	0	0	0	0	inf	inf	0.000109223	0.00865194	up	yes
26198931	26200715	MSTRG.27667.3	2	1321	MSTRG.27667	HIST1H2BF	NA	NA	NA	NA	NA	0	4.0146	3.64983	0	0	0	0	0	inf	inf	0.000109347	0.00865194	up	yes
134641774	134844843	ENST00000371817	66	8471	MSTRG.33443	COL5A1	GO:0001568(blood vessel development);GO:0003007(heart morphogenesis);GO:0005178(integrin binding);GO:0005201(extracellular matrix structural constituent);GO:0005515(protein binding);GO:0005576(extracellular region);GO:0005581(collagen trimer);GO:0005588(collagen type V trimer);GO:0005604(basement membrane);GO:0005615(extracellular space);GO:0005788(endoplasmic reticulum lumen);GO:0007155(cell adh…	04974(Protein digestion and absorption)	K19721	NA	collagen type V alpha 1 chain [Source:HGNC Symbol;Acc:HGNC:2209]	18.6858	19.6258	2.28323	12.4983	1.19852	0.832305	1.57946	1.46369	10.4638	3.38734	0.000109566	0.00865194	up	yes
101815954	102258233	ENST00000645010	22	13651	MSTRG.30256	CUX1	GO:0000122(negative regulation of transcription by RNA polymerase II);GO:0000139(Golgi membrane);GO:0000301(retrograde transport, vesicle recycling within Golgi);GO:0000977(RNA polymerase II regulatory region sequence-specific DNA binding);GO:0000981(DNA-binding transcription factor activity, RNA polymerase II-specific);GO:0003677(DNA binding);GO:0005634(nucleus);GO:0005654(nucleoplasm);GO:000579…	NA	NA	NA	cut like homeobox 1 [Source:HGNC Symbol;Acc:HGNC:2557]	0.433379	0.493929	0	0	0	0	0	0	inf	inf	0.000109922	0.00865194	up	yes
42013802	42225889	ENST00000487159	17	5536	MSTRG.22614	TRAK1	GO:0005102(signaling receptor binding);GO:0005515(protein binding);GO:0005634(nucleus);GO:0005737(cytoplasm);GO:0005739(mitochondrion);GO:0005768(endosome);GO:0005769(early endosome);GO:0005938(cell cortex);GO:0006357(regulation of transcription by RNA polymerase II);GO:0006493(protein O-linked glycosylation);GO:0006605(protein targeting);GO:0008089(anterograde axonal transport);GO:0008104(protei…	NA	K15369	NA	trafficking kinesin protein 1 [Source:HGNC Symbol;Acc:HGNC:29947]	0	0.983878	0.619985	0	0	0	0	0	inf	inf	0.000109936	0.00865194	up	yes
35745651	35746993	MSTRG.17056.3	5	555	MSTRG.17056	AD000671	NA	NA	NA	NA	NA	0	0	0	0	11.7998	11.2182	0	0	-inf	-inf	0.000110019	0.00865194	down	yes
146192405	146251079	ENST00000433593	6	2839	MSTRG.23592	PLSCR4	GO:0005509(calcium ion binding);GO:0005515(protein binding);GO:0005886(plasma membrane);GO:0016020(membrane);GO:0016021(integral component of membrane);GO:0017121(plasma membrane phospholipid scrambling);GO:0017124(SH3 domain binding);GO:0017128(phospholipid scramblase activity);GO:0019899(enzyme binding);GO:0042609(CD4 receptor binding);GO:0071222(cellular response to lipopolysaccharide)	NA	NA	NA	phospholipid scramblase 4 [Source:HGNC Symbol;Acc:HGNC:16497]	0	0	0	0	2.02739	2.52774	0	0	-inf	-inf	0.000110048	0.00865194	down	yes
56614464	56851951	ENST00000520645	34	4598	MSTRG.28343	DST	GO:0002162(dystroglycan binding);GO:0003779(actin binding);GO:0005178(integrin binding);GO:0005198(structural molecule activity);GO:0005509(calcium ion binding);GO:0005515(protein binding);GO:0005604(basement membrane);GO:0005634(nucleus);GO:0005635(nuclear envelope);GO:0005737(cytoplasm);GO:0005783(endoplasmic reticulum);GO:0005789(endoplasmic reticulum membrane);GO:0005829(cytosol);GO:0005856(c…	NA	NA	NA	dystonin [Source:HGNC Symbol;Acc:HGNC:1090]	0	0.282159	0.259812	0.103444	0	0	0	0	inf	inf	0.000110075	0.00865194	up	yes
53936676	54044174	ENST00000338154	22	6062	MSTRG.33996	PHF8	GO:0000082(G1/S transition of mitotic cell cycle);GO:0003682(chromatin binding);GO:0005506(iron ion binding);GO:0005515(protein binding);GO:0005634(nucleus);GO:0005654(nucleoplasm);GO:0005730(nucleolus);GO:0006325(chromatin organization);GO:0007049(cell cycle);GO:0007420(brain development);GO:0008270(zinc ion binding);GO:0016491(oxidoreductase activity);GO:0016706(2-oxoglutarate-dependent dioxyge…	NA	K19415	EC:1.14.11.27	PHD finger protein 8 [Source:HGNC Symbol;Acc:HGNC:20672]	2.0931	3.05831	0.002805	0.014233	0.002423	0.000871	0.003436	0.023825	169.152	7.40218	0.000110111	0.00865194	up	yes
54358585	54382032	ENST00000300091	8	5237	MSTRG.15935	C18orf54	GO:0005515(protein binding);GO:0005576(extracellular region);GO:0008285(negative regulation of cell population proliferation)	NA	NA	NA	chromosome 18 open reading frame 54 [Source:HGNC Symbol;Acc:HGNC:13796]	0	0	0	0	1.61583	0.928814	0	0	-inf	-inf	0.000110397	0.00866325	down	yes
271670	353856	ENST00000506909	5	458	MSTRG.25679	AHRR	GO:0000122(negative regulation of transcription by RNA polymerase II);GO:0000981(DNA-binding transcription factor activity, RNA polymerase II-specific);GO:0003677(DNA binding);GO:0005509(calcium ion binding);GO:0005515(protein binding);GO:0005634(nucleus);GO:0005654(nucleoplasm);GO:0005737(cytoplasm);GO:0005829(cytosol);GO:0006355(regulation of transcription, DNA-templated);GO:0006805(xenobiotic …	NA	K09094	NA	aryl-hydrocarbon receptor repressor [Source:HGNC Symbol;Acc:HGNC:346]	0	0	0	0	17.3081	0	11.8358	0	-inf	-inf	0.0001108	0.00867055	down	yes
127186410	127220078	ENST00000409327	8	2092	MSTRG.19030	CYP27C1	GO:0001972(retinoic acid binding);GO:0004497(monooxygenase activity);GO:0005502(11-cis retinal binding);GO:0005503(all-trans retinal binding);GO:0005506(iron ion binding);GO:0016020(membrane);GO:0016491(oxidoreductase activity);GO:0016705(oxidoreductase activity, acting on paired donors, with incorporation or reduction of molecular oxygen);GO:0020037(heme binding);GO:0042572(retinol metabolic pro…	00830(Retinol metabolism)	K17951	EC:1.14.19.53	cytochrome P450 family 27 subfamily C member 1 [Source:HGNC Symbol;Acc:HGNC:33480]	0	0	2.06988	1.39948	0	0	0	0	inf	inf	0.000111339	0.00867055	up	yes
47275154	47541957	MSTRG.29741.5	31	9983	MSTRG.29741	TNS3	NA	NA	NA	NA	NA	0	0	0	0.151966	5.95554	3.02623	9.29601	9.75808	0.00542042	-7.52738	0.000111488	0.00867055	down	yes
18856350	18931268	ENST00000492129	11	1835	MSTRG.13795	PRPSAP2	GO:0000287(magnesium ion binding);GO:0002189(ribose phosphate diphosphokinase complex);GO:0004749(ribose phosphate diphosphokinase activity);GO:0004857(enzyme inhibitor activity);GO:0005515(protein binding);GO:0005737(cytoplasm);GO:0006015(5-phosphoribose 1-diphosphate biosynthetic process);GO:0006139(nucleobase-containing compound metabolic process);GO:0006164(purine nucleotide biosynthetic proc…	NA	NA	NA	phosphoribosyl pyrophosphate synthetase associated protein 2 [Source:HGNC Symbol;Acc:HGNC:9467]	0.906937	0	0.148693	0.69982	0	0	0	0	inf	inf	0.000111508	0.00867055	up	yes
69414359	69448396	ENST00000559279	22	3129	MSTRG.11150	KIF23	GO:0000022(mitotic spindle elongation);GO:0000166(nucleotide binding);GO:0000281(mitotic cytokinesis);GO:0000915(actomyosin contractile ring assembly);GO:0003774(motor activity);GO:0003777(microtubule motor activity);GO:0005515(protein binding);GO:0005524(ATP binding);GO:0005623(cell);GO:0005634(nucleus);GO:0005654(nucleoplasm);GO:0005737(cytoplasm);GO:0005813(centrosome);GO:0005819(spindle);GO:0…	05206(MicroRNAs in cancer)	K17387	NA	kinesin family member 23 [Source:HGNC Symbol;Acc:HGNC:6392]	0	0	0	0	0	2.22043	0	1.89325	-inf	-inf	0.000111536	0.00867055	down	yes
40028260	40056208	ENST00000617676	5	8664	MSTRG.17199	ZNF780B	GO:0003676(nucleic acid binding);GO:0003677(DNA binding);GO:0005622(intracellular);GO:0005634(nucleus);GO:0006355(regulation of transcription, DNA-templated);GO:0046872(metal ion binding)	05168(Herpes simplex virus 1 infection)	K09228	NA	zinc finger protein 780B [Source:HGNC Symbol;Acc:HGNC:33109]	0	0.38507	0	0.641178	0	0	0	0	inf	inf	0.000111692	0.00867055	up	yes
31952580	31953361	ENST00000566025	1	782	MSTRG.8559	EEF1DP3	NA	NA	NA	NA	eukaryotic translation elongation factor 1 delta pseudogene 3 [Source:HGNC Symbol;Acc:HGNC:30486]	3.45179	3.5445	4.69273	3.24465	0.51247	0.034463	0.104825	0.092335	20.0696	4.32694	0.000111766	0.00867055	up	yes
150323263	150338103	ENST00000323078	2	1684	MSTRG.30788	LRRC61	GO:0005515(protein binding);GO:0005737(cytoplasm);GO:0036158(outer dynein arm assembly)	NA	NA	NA	leucine rich repeat containing 61 [Source:HGNC Symbol;Acc:HGNC:21704]	2.16797	0	2.29489	0	0	0	0	0	inf	inf	0.000111793	0.00867055	up	yes
24209646	24216037	MSTRG.9279.40	9	1707	MSTRG.9279	AL136295	NA	NA	NA	NA	NA	0	2.0918	3.56588	0	0	0	0	0	inf	inf	0.000111928	0.00867055	up	yes
48530186	48598513	ENST00000406226	5	5614	ENSG00000243244	STON1	GO:0005737(cytoplasm);GO:0006897(endocytosis);GO:0016020(membrane);GO:0030100(regulation of endocytosis)	NA	K20067	NA	stonin 1 [Source:HGNC Symbol;Acc:HGNC:17003]	0	0	0	0	1.0614	0	0	1.20273	-inf	-inf	0.000112113	0.00867055	down	yes
100913203	100919238	ENST00000560068	2	3213	MSTRG.11666	AC015712	NA	NA	NA	NA	novel transcript, antisense to LRRK1 and ALDH1A3	1.06742	0	1.32948	0	0	0	0	0	inf	inf	0.000112131	0.00867055	up	yes
131929223	131945896	MSTRG.8382.2	7	3978	MSTRG.8382	PUS1	NA	NA	NA	NA	NA	2.5633	0	0.661292	0	0	0	0	0	inf	inf	0.000112201	0.00867055	up	yes
53498756	53544645	ENST00000513939	15	1800	MSTRG.28318	GCLC	GO:0000166(nucleotide binding);GO:0000287(magnesium ion binding);GO:0003824(catalytic activity);GO:0004357(glutamate-cysteine ligase activity);GO:0005524(ATP binding);GO:0005829(cytosol);GO:0006534(cysteine metabolic process);GO:0006536(glutamate metabolic process);GO:0006749(glutathione metabolic process);GO:0006750(glutathione biosynthetic process);GO:0006979(response to oxidative stress);GO:00…	00270(Cysteine and methionine metabolism);00480(Glutathione metabolism);04216(Ferroptosis)	NA	NA	glutamate-cysteine ligase catalytic subunit [Source:HGNC Symbol;Acc:HGNC:4311]	0	0	0	0	0	0.564236	0.322446	0.878685	-inf	-inf	0.000112675	0.0086931	down	yes
103555247	103594028	MSTRG.4440.7	5	5447	MSTRG.4440	NEURL1	NA	NA	NA	NA	NA	0	0	0	0	1.04206	1.15257	0	0	-inf	-inf	0.000112779	0.0086931	down	yes
50269214	50276706	ENST00000611067	17	2292	MSTRG.22818	SEMA3B	GO:0001755(neural crest cell migration);GO:0005515(protein binding);GO:0005576(extracellular region);GO:0005615(extracellular space);GO:0005783(endoplasmic reticulum);GO:0005887(integral component of plasma membrane);GO:0007267(cell-cell signaling);GO:0007411(axon guidance);GO:0030215(semaphorin receptor binding);GO:0030335(positive regulation of cell migration);GO:0038191(neuropilin binding);GO:…	04360(Axon guidance)	K06840	NA	semaphorin 3B [Source:HGNC Symbol;Acc:HGNC:10724]	0	1.4531	2.6682	0	0	0	0	0	inf	inf	0.000113006	0.008695	up	yes
39841051	39883491	ENST00000441669	9	1851	MSTRG.818	TRIT1	GO:0000166(nucleotide binding);GO:0003676(nucleic acid binding);GO:0005524(ATP binding);GO:0005575(cellular_component);GO:0005737(cytoplasm);GO:0005739(mitochondrion);GO:0005759(mitochondrial matrix);GO:0006400(tRNA modification);GO:0008033(tRNA processing);GO:0008270(zinc ion binding);GO:0016740(transferase activity);GO:0046872(metal ion binding);GO:0052381(tRNA dimethylallyltransferase activity…	NA	K00791	EC:2.5.1.75	tRNA isopentenyltransferase 1 [Source:HGNC Symbol;Acc:HGNC:20286]	0.083956	2.91574	0.875394	0.01928	0	0	0	0.024924	156.25	7.28771	0.000113089	0.008695	up	yes
126544150	126595219	ENST00000636879	19	2501	MSTRG.26712	ALDH7A1	GO:0004029(aldehyde dehydrogenase (NAD) activity);GO:0004043(L-aminoadipate-semialdehyde dehydrogenase activity);GO:0005515(protein binding);GO:0005634(nucleus);GO:0005737(cytoplasm);GO:0005739(mitochondrion);GO:0005759(mitochondrial matrix);GO:0005829(cytosol);GO:0006081(cellular aldehyde metabolic process);GO:0006554(lysine catabolic process);GO:0007605(sensory perception of sound);GO:0008802(b…	00010(Glycolysis / Gluconeogenesis);00053(Ascorbate and aldarate metabolism);00071(Fatty acid degradation);00260(Glycine, serine and threonine metabolism);00280(Valine, leucine and isoleucine degradation);00310(Lysine degradation);00330(Arginine and proline metabolism);00340(Histidine metabolism);00380(Tryptophan metabolism);00410(beta-Alanine metabolism);00561(Glycerolipid metabolism);00620(Pyru…	NA	NA	aldehyde dehydrogenase 7 family member A1 [Source:HGNC Symbol;Acc:HGNC:877]	0	0	0	0	0	2.86883	2.1178	0	-inf	-inf	0.000113396	0.0087076	down	yes
41790059	41840961	MSTRG.28145.3	7	8124	MSTRG.28145	USP49	NA	NA	NA	NA	NA	0.001517	2.06766	0.002285	0.846364	0.002808	0.003182	0.003429	0	309.781	8.27511	0.000114443	0.00877688	up	yes
149129638	149172361	ENST00000460120	16	2745	MSTRG.23608	HPS3	GO:0005515(protein binding);GO:0005737(cytoplasm);GO:0005829(cytosol);GO:0006996(organelle organization);GO:0031084(BLOC-2 complex);GO:0043473(pigmentation)	NA	K20190	NA	HPS3, biogenesis of lysosomal organelles complex 2 subunit 1 [Source:HGNC Symbol;Acc:HGNC:15597]	0	0	0	0	0	1.6498	0	3.1137	-inf	-inf	0.000114621	0.00877951	down	yes
10049462	10101926	ENST00000421731	27	3425	MSTRG.22324	FANCD2	GO:0000793(condensed chromosome);GO:0005515(protein binding);GO:0005634(nucleus);GO:0005654(nucleoplasm);GO:0005730(nucleolus);GO:0005829(cytosol);GO:0006281(DNA repair);GO:0006974(cellular response to DNA damage stimulus);GO:0007049(cell cycle);GO:0007129(synapsis);GO:0007276(gamete generation);GO:0010332(response to gamma radiation);GO:0016604(nuclear body);GO:0034599(cellular response to oxida…	03460(Fanconi anemia pathway)	K10891	NA	FA complementation group D2 [Source:HGNC Symbol;Acc:HGNC:3585]	0	0	0	0	0	1.09885	3.10147	0	-inf	-inf	0.000115381	0.00882655	down	yes
26282305	26301025	MSTRG.537.11	9	2235	MSTRG.537	UBXN11	NA	NA	NA	NA	NA	0	0	0	0	5.30524	0	1.62253	0	-inf	-inf	0.00011564	0.00883414	down	yes
63615781	63723257	MSTRG.11027.5	58	10385	MSTRG.11027	HERC1	NA	NA	NA	NA	NA	0	0	0	0	0	0	0.66313	0.538696	-inf	-inf	0.000115778	0.00883414	down	yes
2652777	2658393	MSTRG.20203.9	11	2324	MSTRG.20203	NOP56	NA	NA	NA	NA	NA	0	0	0	0	0	2.21976	0	2.79399	-inf	-inf	0.000115916	0.00883414	down	yes
153959112	153967712	ENST00000310483	5	2427	MSTRG.2152	SLC39A1	GO:0001701(in utero embryonic development);GO:0005102(signaling receptor binding);GO:0005385(zinc ion transmembrane transporter activity);GO:0005783(endoplasmic reticulum);GO:0005789(endoplasmic reticulum membrane);GO:0005886(plasma membrane);GO:0006811(ion transport);GO:0006812(cation transport);GO:0006829(zinc ion transport);GO:0016020(membrane);GO:0016021(integral component of membrane);GO:002…	NA	K14709	NA	solute carrier family 39 member 1 [Source:HGNC Symbol;Acc:HGNC:12876]	0.158785	0.136685	0.62884	56.5341	0.237728	0.082915	0.08902	0.150725	102.533	6.67995	0.000116158	0.00884152	up	yes
45765393	45768851	MSTRG.17385.5	4	1982	MSTRG.17385	SIX5	NA	NA	NA	NA	NA	0	0	0	0	0	4.21493	0	2.25571	-inf	-inf	0.000116678	0.00884516	down	yes
15116462	15125633	ENST00000533148	10	1309	MSTRG.16687	ILVBL	GO:0000287(magnesium ion binding);GO:0003674(molecular_function);GO:0003824(catalytic activity);GO:0005515(protein binding);GO:0008150(biological_process);GO:0016020(membrane);GO:0016021(integral component of membrane);GO:0016740(transferase activity);GO:0030976(thiamine pyrophosphate binding);GO:0046872(metal ion binding)	NA	K11259	EC:2.2.1.-	ilvB acetolactate synthase like [Source:HGNC Symbol;Acc:HGNC:6041]	0	3.78176	0	2.30742	0	0	0	0	inf	inf	0.000116916	0.00884516	up	yes
52114790	52139746	ENST00000330123	5	2563	MSTRG.17606	ZNF616	GO:0000981(DNA-binding transcription factor activity, RNA polymerase II-specific);GO:0003676(nucleic acid binding);GO:0003677(DNA binding);GO:0005622(intracellular);GO:0005634(nucleus);GO:0006355(regulation of transcription, DNA-templated);GO:0006357(regulation of transcription by RNA polymerase II);GO:0046872(metal ion binding)	05168(Herpes simplex virus 1 infection)	K09228	NA	zinc finger protein 616 [Source:HGNC Symbol;Acc:HGNC:28062]	0	0.309382	0.614295	0.751529	0.003646	0	0	0	459.464	8.84381	0.00011692	0.00884516	up	yes
150865944	150926153	ENST00000367308	11	996	MSTRG.29062	MTHFD1L	GO:0000166(nucleotide binding);GO:0001843(neural tube closure);GO:0004329(formate-tetrahydrofolate ligase activity);GO:0004488(methylenetetrahydrofolate dehydrogenase (NADP+) activity);GO:0005524(ATP binding);GO:0005737(cytoplasm);GO:0005739(mitochondrion);GO:0005759(mitochondrial matrix);GO:0006730(one-carbon metabolic process);GO:0006760(folic acid-containing compound metabolic process);GO:0009…	00670(One carbon pool by folate)	K13402	EC:6.3.4.3	methylenetetrahydrofolate dehydrogenase (NADP+ dependent) 1 like [Source:HGNC Symbol;Acc:HGNC:21055]	0.328758	5.76951	5.31705	5.93041	0.285909	0.009201	0.137514	0.090837	33.1366	5.05035	0.000117069	0.00884516	up	yes
23296035	23301270	MSTRG.9253.11	4	3327	MSTRG.9253	PPP1R3E	NA	NA	NA	NA	NA	0	0	0	0	0.214062	0	0.336821	0.352137	-inf	-inf	0.00011709	0.00884516	down	yes
48920027	48952052	MSTRG.15890.2	5	3538	MSTRG.15890	SMAD7	NA	NA	NA	NA	NA	0	0	0	0	1.31614	0	0	2.12275	-inf	-inf	0.000117091	0.00884516	down	yes
32165841	32224112	ENST00000357055	13	4758	MSTRG.18109	SLC30A6	GO:0000139(Golgi membrane);GO:0005385(zinc ion transmembrane transporter activity);GO:0005794(Golgi apparatus);GO:0006811(ion transport);GO:0006812(cation transport);GO:0006829(zinc ion transport);GO:0008324(cation transmembrane transporter activity);GO:0016020(membrane);GO:0016021(integral component of membrane);GO:0055085(transmembrane transport);GO:0071577(zinc ion transmembrane transport);GO:…	NA	K14693	NA	solute carrier family 30 member 6 [Source:HGNC Symbol;Acc:HGNC:19305]	0	0	0	0	0	0.925143	0	1.65879	-inf	-inf	0.000117418	0.00884516	down	yes
34382156	34583634	MSTRG.10470.16	21	3679	MSTRG.10470	GOLGA8B	NA	NA	NA	NA	NA	0	0	0	0	6.39977	0	0.474022	0	-inf	-inf	0.000117592	0.00884516	down	yes
123471816	123533718	ENST00000636882	8	2258	MSTRG.8313	RILPL1	GO:0003382(epithelial cell morphogenesis);GO:0005654(nucleoplasm);GO:0005737(cytoplasm);GO:0005813(centrosome);GO:0005815(microtubule organizing center);GO:0005829(cytosol);GO:0005856(cytoskeleton);GO:0005886(plasma membrane);GO:0005929(cilium);GO:0015031(protein transport);GO:0031267(small GTPase binding);GO:0036064(ciliary basal body);GO:0042995(cell projection);GO:0046983(protein dimerization …	NA	K20173	NA	Rab interacting lysosomal protein like 1 [Source:HGNC Symbol;Acc:HGNC:26814]	2.08032	0	1.21871	1e-05	1e-05	0	0	0	329904	18.3317	0.000117617	0.00884516	up	yes
39699560	39728662	ENST00000541774	27	4341	MSTRG.14308	ERBB2	GO:0000165(MAPK cascade);GO:0000166(nucleotide binding);GO:0001042(RNA polymerase I core binding);GO:0001934(positive regulation of protein phosphorylation);GO:0004672(protein kinase activity);GO:0004713(protein tyrosine kinase activity);GO:0004714(transmembrane receptor protein tyrosine kinase activity);GO:0004888(transmembrane signaling receptor activity);GO:0005515(protein binding);GO:0005524(…	01521(EGFR tyrosine kinase inhibitor resistance);01522(Endocrine resistance);01524(Platinum drug resistance);04010(MAPK signaling pathway);04012(ErbB signaling pathway);04020(Calcium signaling pathway);04066(HIF-1 signaling pathway);04151(PI3K-Akt signaling pathway);04510(Focal adhesion);04520(Adherens junction);04530(Tight junction);05200(Pathways in cancer);05205(Proteoglycans in cancer);05206(…	K05083	EC:2.7.10.1	erb-b2 receptor tyrosine kinase 2 [Source:HGNC Symbol;Acc:HGNC:3430]	0	0	0	0	0	0	1.19797	1.13514	-inf	-inf	0.00011766	0.00884516	down	yes
5784572	5832499	MSTRG.32234.3	15	4995	MSTRG.32234	ERMP1	NA	NA	NA	NA	NA	0.025115	0.100363	0.100048	0	0.087106	9.62064	13.9757	0.174391	0.00945293	-6.72502	0.000117988	0.00885885	down	yes
28823093	28837237	ENST00000382686	23	3739	MSTRG.12352	ATXN2L	GO:0003723(RNA binding);GO:0005515(protein binding);GO:0005634(nucleus);GO:0005737(cytoplasm);GO:0005829(cytosol);GO:0010494(cytoplasmic stress granule);GO:0010603(regulation of cytoplasmic mRNA processing body assembly);GO:0016020(membrane);GO:0016021(integral component of membrane);GO:0016607(nuclear speck);GO:0034063(stress granule assembly);GO:0045296(cadherin binding)	NA	NA	NA	ataxin 2 like [Source:HGNC Symbol;Acc:HGNC:31326]	1.15339	1.28461	0	0	0	0	0	0	inf	inf	0.000118591	0.00887183	up	yes
22766688	22770563	ENST00000473744	4	824	MSTRG.9227	OXA1L	GO:0005515(protein binding);GO:0005739(mitochondrion);GO:0005743(mitochondrial inner membrane);GO:0005746(mitochondrial respirasome);GO:0005759(mitochondrial matrix);GO:0009060(aerobic respiration);GO:0015031(protein transport);GO:0016020(membrane);GO:0016021(integral component of membrane);GO:0031305(integral component of mitochondrial inner membrane);GO:0031966(mitochondrial membrane);GO:003259…	03060(Protein export)	K03217	NA	OXA1L, mitochondrial inner membrane protein [Source:HGNC Symbol;Acc:HGNC:8526]	0	0	0	0	0	0	5.38798	6.75004	-inf	-inf	0.000118867	0.00887183	down	yes
101815954	102258233	ENST00000646649	22	13345	MSTRG.30256	CUX1	GO:0000122(negative regulation of transcription by RNA polymerase II);GO:0000139(Golgi membrane);GO:0000301(retrograde transport, vesicle recycling within Golgi);GO:0000977(RNA polymerase II regulatory region sequence-specific DNA binding);GO:0000981(DNA-binding transcription factor activity, RNA polymerase II-specific);GO:0003677(DNA binding);GO:0005634(nucleus);GO:0005654(nucleoplasm);GO:000579…	NA	NA	NA	cut like homeobox 1 [Source:HGNC Symbol;Acc:HGNC:2557]	0.358086	0.429296	0	0	0	0	0	0	inf	inf	0.00011889	0.00887183	up	yes
43796142	43802082	ENST00000406925	5	4777	MSTRG.10750	HYPK	GO:0005515(protein binding);GO:0005634(nucleus);GO:0005654(nucleoplasm);GO:0005737(cytoplasm);GO:0015630(microtubule cytoskeleton);GO:0032991(protein-containing complex);GO:0043066(negative regulation of apoptotic process);GO:0047485(protein N-terminus binding);GO:0050821(protein stabilization)	NA	NA	NA	huntingtin interacting protein K [Source:HGNC Symbol;Acc:HGNC:18418]	0	0	0	0	1.33246	0	0	1.04111	-inf	-inf	0.000118958	0.00887183	down	yes
110663208	111276618	MSTRG.30387.3	4	2374	MSTRG.30387	IMMP2L	NA	NA	NA	NA	NA	0	0	0	0	0	3.13428	0	1.88801	-inf	-inf	0.000118985	0.00887183	down	yes
63528425	63537370	ENST00000217185	7	2401	MSTRG.20937	PTK6	GO:0000166(nucleotide binding);GO:0001726(ruffle);GO:0004672(protein kinase activity);GO:0004713(protein tyrosine kinase activity);GO:0004715(non-membrane spanning protein tyrosine kinase activity);GO:0005102(signaling receptor binding);GO:0005515(protein binding);GO:0005524(ATP binding);GO:0005634(nucleus);GO:0005654(nucleoplasm);GO:0005737(cytoplasm);GO:0005829(cytosol);GO:0005886(plasma membra…	NA	NA	NA	protein tyrosine kinase 6 [Source:HGNC Symbol;Acc:HGNC:9617]	1.93797	0	1.11963	0	0	0	0	0	inf	inf	0.000119089	0.00887183	up	yes
122528005	122564242	ENST00000471785	11	3040	MSTRG.23276	PARP9	GO:0000122(negative regulation of transcription by RNA polymerase II);GO:0002230(positive regulation of defense response to virus by host);GO:0002376(immune system process);GO:0003714(transcription corepressor activity);GO:0003950(NAD+ ADP-ribosyltransferase activity);GO:0004857(enzyme inhibitor activity);GO:0005515(protein binding);GO:0005634(nucleus);GO:0005654(nucleoplasm);GO:0005737(cytoplasm…	NA	K15260	EC:2.4.2.30	poly(ADP-ribose) polymerase family member 9 [Source:HGNC Symbol;Acc:HGNC:24118]	0	0	0	0	1.38439	1.67273	0	0	-inf	-inf	0.000119182	0.00887183	down	yes
28616667	28619775	ENST00000579924	4	477	MSTRG.13934	KIAA0100	GO:0005515(protein binding);GO:0005576(extracellular region)	NA	NA	NA	KIAA0100 [Source:HGNC Symbol;Acc:HGNC:28960]	0	0	9.10248	5.62147	0	0	0	0	inf	inf	0.000119519	0.00888602	up	yes
51096023	51172793	ENST00000548108	14	1508	MSTRG.7268	TFCP2	GO:0000978(RNA polymerase II proximal promoter sequence-specific DNA binding);GO:0000981(DNA-binding transcription factor activity, RNA polymerase II-specific);GO:0000987(proximal promoter sequence-specific DNA binding);GO:0001228(DNA-binding transcription activator activity, RNA polymerase II-specific);GO:0003677(DNA binding);GO:0003700(DNA-binding transcription factor activity);GO:0005515(prote…	NA	K09275	NA	transcription factor CP2 [Source:HGNC Symbol;Acc:HGNC:11748]	0	2.64379	0	2.39231	0	0	0	0	inf	inf	0.000119773	0.00888784	up	yes
24232636	24239204	ENST00000559910	10	1562	MSTRG.9284	GMPR2	GO:0003824(catalytic activity);GO:0003920(GMP reductase activity);GO:0003938(IMP dehydrogenase activity);GO:0005829(cytosol);GO:0006144(purine nucleobase metabolic process);GO:0006163(purine nucleotide metabolic process);GO:0006164(purine nucleotide biosynthetic process);GO:0009117(nucleotide metabolic process);GO:0015951(purine ribonucleotide interconversion);GO:0016491(oxidoreductase activity);…	00230(Purine metabolism)	K00364	EC:1.7.1.7	guanosine monophosphate reductase 2 [Source:HGNC Symbol;Acc:HGNC:4377]	0	0	0	0	3.28253	0	3.57557	0	-inf	-inf	0.000119977	0.00888784	down	yes
41334613	41349891	ENST00000642322	17	4273	MSTRG.33850	DDX3X	GO:0000166(nucleotide binding);GO:0002376(immune system process);GO:0003676(nucleic acid binding);GO:0003677(DNA binding);GO:0003723(RNA binding);GO:0003924(GTPase activity);GO:0004003(ATP-dependent DNA helicase activity);GO:0004004(ATP-dependent RNA helicase activity);GO:0004386(helicase activity);GO:0005515(protein binding);GO:0005524(ATP binding);GO:0005576(extracellular region);GO:0005634(nuc…	04622(RIG-I-like receptor signaling pathway);05161(Hepatitis B);05203(Viral carcinogenesis)	K11594	EC:3.6.4.13	DEAD-box helicase 3 X-linked [Source:HGNC Symbol;Acc:HGNC:2745]	0	0	0	0	0	1.3862	0.932756	0	-inf	-inf	0.000120291	0.00888784	down	yes
184314619	184319728	ENST00000440448	7	578	MSTRG.23994	EIF4G1	GO:0000184(nuclear-transcribed mRNA catabolic process, nonsense-mediated decay);GO:0001662(behavioral fear response);GO:0002191(cap-dependent translational initiation);GO:0003723(RNA binding);GO:0003729(mRNA binding);GO:0003743(translation initiation factor activity);GO:0005515(protein binding);GO:0005524(ATP binding);GO:0005634(nucleus);GO:0005737(cytoplasm);GO:0005829(cytosol);GO:0005844(polyso…	03013(RNA transport);05416(Viral myocarditis)	K03260	NA	eukaryotic translation initiation factor 4 gamma 1 [Source:HGNC Symbol;Acc:HGNC:3296]	0	0	0	0	1.3779	1.37587	2.25829	0	-inf	-inf	0.000120496	0.00888784	down	yes
78625670	78642799	ENST00000486882	7	5152	ENSG00000137959	IFI44L	GO:0003674(molecular_function);GO:0005525(GTP binding);GO:0005575(cellular_component);GO:0005737(cytoplasm);GO:0006955(immune response);GO:0051607(defense response to virus)	NA	NA	NA	interferon induced protein 44 like [Source:HGNC Symbol;Acc:HGNC:17817]	0	0	0	0	0	0.122724	0.205785	0.253566	-inf	-inf	0.000120512	0.00888784	down	yes
9574687	9589984	ENST00000299613	11	3436	MSTRG.4936	WEE1	GO:0000086(G2/M transition of mitotic cell cycle);GO:0000166(nucleotide binding);GO:0000226(microtubule cytoskeleton organization);GO:0000278(mitotic cell cycle);GO:0000287(magnesium ion binding);GO:0004672(protein kinase activity);GO:0004713(protein tyrosine kinase activity);GO:0004715(non-membrane spanning protein tyrosine kinase activity);GO:0005515(protein binding);GO:0005524(ATP binding);GO:…	04110(Cell cycle);05170(Human immunodeficiency virus 1 infection)	K06632	EC:2.7.11.1	WEE1 G2 checkpoint kinase [Source:HGNC Symbol;Acc:HGNC:12761]	1.34148	1.62925	0	0	0	0	0	0	inf	inf	0.00012065	0.00888784	up	yes
197084128	197146694	ENST00000294732	27	6132	MSTRG.2662	ASPM	GO:0000922(spindle pole);GO:0001764(neuron migration);GO:0002052(positive regulation of neuroblast proliferation);GO:0005515(protein binding);GO:0005516(calmodulin binding);GO:0005634(nucleus);GO:0005737(cytoplasm);GO:0005813(centrosome);GO:0005819(spindle);GO:0005856(cytoskeleton);GO:0005874(microtubule);GO:0007049(cell cycle);GO:0007051(spindle organization);GO:0007283(spermatogenesis);GO:00074…	NA	K16743	NA	abnormal spindle microtubule assembly [Source:HGNC Symbol;Acc:HGNC:19048]	0.00288	0.754083	0.016915	0.458546	0.00703	0.003296	0.005013	0.00243	69.3581	6.11599	0.000120728	0.00888784	up	yes
2039412	2050853	ENST00000586828	12	1503	MSTRG.16222	MKNK2	GO:0000166(nucleotide binding);GO:0004672(protein kinase activity);GO:0004674(protein serine/threonine kinase activity);GO:0004683(calmodulin-dependent protein kinase activity);GO:0005515(protein binding);GO:0005516(calmodulin binding);GO:0005524(ATP binding);GO:0005634(nucleus);GO:0005654(nucleoplasm);GO:0005737(cytoplasm);GO:0006417(regulation of translation);GO:0006468(protein phosphorylation)…	04010(MAPK signaling pathway);04066(HIF-1 signaling pathway);04910(Insulin signaling pathway)	K04372	EC:2.7.11.1	MAP kinase interacting serine/threonine kinase 2 [Source:HGNC Symbol;Acc:HGNC:7111]	5.61284	2.41395	0	0	0	0	0	0	inf	inf	0.000120857	0.00888784	up	yes
57772614	57796734	MSTRG.7526.3	7	1417	MSTRG.7526	TSFM	NA	NA	NA	NA	NA	0	0	0	0	5.7502	2.64037	0	0	-inf	-inf	0.000120858	0.00888784	down	yes
17972583	18027747	ENST00000522275	18	2379	MSTRG.31021	PCM1	GO:0000086(G2/M transition of mitotic cell cycle);GO:0000242(pericentriolar material);GO:0001764(neuron migration);GO:0005515(protein binding);GO:0005737(cytoplasm);GO:0005813(centrosome);GO:0005814(centriole);GO:0005815(microtubule organizing center);GO:0005829(cytosol);GO:0005856(cytoskeleton);GO:0007098(centrosome cycle);GO:0010389(regulation of G2/M transition of mitotic cell cycle);GO:001602…	NA	NA	NA	pericentriolar material 1 [Source:HGNC Symbol;Acc:HGNC:8727]	0	0	0	0	0	0	1.95176	2.81958	-inf	-inf	0.000121026	0.00888945	down	yes
69279539	69332800	MSTRG.26173.2	12	4799	MSTRG.26173	CCDC125	NA	NA	NA	NA	NA	0	0	0	0	0	1.82464	0	0.799112	-inf	-inf	0.000121378	0.00890452	down	yes
48996384	49046446	ENST00000380927	17	2551	MSTRG.10815	SECISBP2L	GO:0001514(selenocysteine incorporation);GO:0003723(RNA binding);GO:0003730(mRNA 3'-UTR binding);GO:0005515(protein binding);GO:0035368(selenocysteine insertion sequence binding);GO:0043021(ribonucleoprotein complex binding);GO:1990904(ribonucleoprotein complex)	NA	NA	NA	SECIS binding protein 2 like [Source:HGNC Symbol;Acc:HGNC:28997]	2.36326	0	0.831779	0	0	0	0	0	inf	inf	0.000121902	0.00893222	up	yes
102347374	102378670	ENST00000527910	9	4073	MSTRG.6135	BIRC2	GO:0000209(protein polyubiquitination);GO:0001666(response to hypoxia);GO:0001741(XY body);GO:0001890(placenta development);GO:0002756(MyD88-independent toll-like receptor signaling pathway);GO:0003713(transcription coactivator activity);GO:0004842(ubiquitin-protein transferase activity);GO:0005515(protein binding);GO:0005634(nucleus);GO:0005737(cytoplasm);GO:0005829(cytosol);GO:0006915(apoptotic…	01524(Platinum drug resistance);04064(NF-kappa B signaling pathway);04120(Ubiquitin mediated proteolysis);04210(Apoptosis);04215(Apoptosis - multiple species);04217(Necroptosis);04390(Hippo signaling pathway);04510(Focal adhesion);04621(NOD-like receptor signaling pathway);04668(TNF signaling pathway);05145(Toxoplasmosis);05168(Herpes simplex virus 1 infection);05200(Pathways in cancer);05222(Sma…	NA	NA	baculoviral IAP repeat containing 2 [Source:HGNC Symbol;Acc:HGNC:590]	0	0	0	0	0	0.953181	1.66108	0	-inf	-inf	0.000122421	0.00895946	down	yes
36300910	36388067	MSTRG.21889.7	22	3623	MSTRG.21889	MYH9	NA	NA	NA	NA	NA	51.4451	0.476443	15.547	0.562278	0.262995	0.84208	0.374858	0.439453	35.4441	5.14747	0.000122572	0.00895968	up	yes
124285628	124352438	MSTRG.33178.12	10	3325	MSTRG.33178	NEK6	NA	NA	NA	NA	NA	0	0	0	0	2.40907	1.08308	0	0	-inf	-inf	0.00012294	0.00897579	down	yes
6798941	6826770	ENST00000626257	14	2211	MSTRG.29348	CCZ1B	GO:0005764(lysosome);GO:0005765(lysosomal membrane);GO:0005829(cytosol);GO:0016020(membrane);GO:0016192(vesicle-mediated transport);GO:0016235(aggresome);GO:0035658(Mon1-Ccz1 complex);GO:0043231(intracellular membrane-bounded organelle)	NA	NA	NA	CCZ1 homolog B, vacuolar protein trafficking and biogenesis associated [Source:HGNC Symbol;Acc:HGNC:21717]	0	1.59948	1.68915	0	0	0	0	0	inf	inf	0.00012347	0.00898648	up	yes
28914601	29117048	ENST00000349460	20	2937	MSTRG.627	EPB41	GO:0003779(actin binding);GO:0005198(structural molecule activity);GO:0005200(structural constituent of cytoskeleton);GO:0005515(protein binding);GO:0005516(calmodulin binding);GO:0005545(1-phosphatidylinositol binding);GO:0005634(nucleus);GO:0005737(cytoplasm);GO:0005829(cytosol);GO:0005856(cytoskeleton);GO:0005886(plasma membrane);GO:0005938(cell cortex);GO:0007049(cell cycle);GO:0008022(protei…	NA	NA	NA	erythrocyte membrane protein band 4.1 [Source:HGNC Symbol;Acc:HGNC:3377]	0	0	0	0	1.08265	0.370353	0	0.035077	-inf	-inf	0.000123526	0.00898648	down	yes
34787801	35049298	ENST00000437180	9	5967	MSTRG.21231	RUNX1	GO:0000122(negative regulation of transcription by RNA polymerase II);GO:0000977(RNA polymerase II regulatory region sequence-specific DNA binding);GO:0000978(RNA polymerase II proximal promoter sequence-specific DNA binding);GO:0000981(DNA-binding transcription factor activity, RNA polymerase II-specific);GO:0001228(DNA-binding transcription activator activity, RNA polymerase II-specific);GO:000…	04530(Tight junction);04659(Th17 cell differentiation);05200(Pathways in cancer);05202(Transcriptional misregulation in cancer);05220(Chronic myeloid leukemia);05221(Acute myeloid leukemia)	NA	NA	runt related transcription factor 1 [Source:HGNC Symbol;Acc:HGNC:10471]	0.004221	1.28689	0.603314	0.012885	0	0.006353	0	0	300.222	8.22989	0.000123642	0.00898648	up	yes
143294604	143307696	MSTRG.30697.11	6	3510	MSTRG.30697	CASP2	NA	NA	NA	NA	NA	0.271924	0.305519	0.18654	0.425767	8.3887	8.28032	0.325745	6.21722	0.0512558	-4.28614	0.000123677	0.00898648	down	yes
136250355	136330169	ENST00000484181	14	1683	MSTRG.23477	PCCB	GO:0000166(nucleotide binding);GO:0003989(acetyl-CoA carboxylase activity);GO:0004658(propionyl-CoA carboxylase activity);GO:0005515(protein binding);GO:0005524(ATP binding);GO:0005739(mitochondrion);GO:0005759(mitochondrial matrix);GO:0005829(cytosol);GO:0006633(fatty acid biosynthetic process);GO:0006768(biotin metabolic process);GO:0009317(acetyl-CoA carboxylase complex);GO:0016874(ligase acti…	00280(Valine, leucine and isoleucine degradation);00630(Glyoxylate and dicarboxylate metabolism);00640(Propanoate metabolism)	NA	NA	propionyl-CoA carboxylase subunit beta [Source:HGNC Symbol;Acc:HGNC:8654]	0	0	0	0	0	1.32556	10.2802	0	-inf	-inf	0.00012427	0.0090188	down	yes
218859805	218874233	ENST00000233948	4	1719	MSTRG.19924	WNT6	GO:0001658(branching involved in ureteric bud morphogenesis);GO:0005102(signaling receptor binding);GO:0005109(frizzled binding);GO:0005576(extracellular region);GO:0005615(extracellular space);GO:0005788(endoplasmic reticulum lumen);GO:0005796(Golgi lumen);GO:0005886(plasma membrane);GO:0007275(multicellular organism development);GO:0009798(axis specification);GO:0009986(cell surface);GO:0010628…	04150(mTOR signaling pathway);04310(Wnt signaling pathway);04390(Hippo signaling pathway);04550(Signaling pathways regulating pluripotency of stem cells);04916(Melanogenesis);04934(Cushing syndrome);05165(Human papillomavirus infection);05200(Pathways in cancer);05205(Proteoglycans in cancer);05217(Basal cell carcinoma);05224(Breast cancer);05225(Hepatocellular carcinoma);05226(Gastric cancer)	K00445	NA	Wnt family member 6 [Source:HGNC Symbol;Acc:HGNC:12785]	0.19351	0.251877	0.044686	0.182945	3.18038	2.44744	2.92849	2.60762	0.060285	-4.05206	0.000124826	0.00904402	down	yes
42087200	42218432	MSTRG.22614.7	15	3263	MSTRG.22614	TRAK1	NA	NA	NA	NA	NA	1.79615	0	0.604848	0	0	0	0	0	inf	inf	0.000125056	0.00904402	up	yes
34790233	34795412	MSTRG.10445.4	7	1590	MSTRG.10445	ACTC1	NA	NA	NA	NA	NA	6.89548	0.631958	3.53755	0.49646	0.080825	0.149874	0.138797	0.131508	23.0766	4.52836	0.000125064	0.00904402	up	yes
50274979	50283068	ENST00000610984	21	3445	MSTRG.22212	PLXNB2	GO:0001843(neural tube closure);GO:0001932(regulation of protein phosphorylation);GO:0002116(semaphorin receptor complex);GO:0005515(protein binding);GO:0005886(plasma membrane);GO:0005887(integral component of plasma membrane);GO:0007156(homophilic cell adhesion via plasma membrane adhesion molecules);GO:0007162(negative regulation of cell adhesion);GO:0007165(signal transduction);GO:0007275(mul…	04360(Axon guidance)	K06821	NA	plexin B2 [Source:HGNC Symbol;Acc:HGNC:9104]	0.002766	0.037839	0.000116	0.000127	0.596169	4.82965	0.000119	0.466903	0.00693181	-7.17255	0.000125613	0.00904586	down	yes
76048161	76067067	ENST00000432020	8	1548	MSTRG.30000	MDH2	GO:0003723(RNA binding);GO:0003824(catalytic activity);GO:0005634(nucleus);GO:0005739(mitochondrion);GO:0005759(mitochondrial matrix);GO:0005975(carbohydrate metabolic process);GO:0006094(gluconeogenesis);GO:0006099(tricarboxylic acid cycle);GO:0006107(oxaloacetate metabolic process);GO:0006108(malate metabolic process);GO:0006475(internal protein amino acid acetylation);GO:0006734(NADH metabolic…	00020(Citrate cycle (TCA cycle));00270(Cysteine and methionine metabolism);00620(Pyruvate metabolism);00630(Glyoxylate and dicarboxylate metabolism)	K00026	EC:1.1.1.37	malate dehydrogenase 2 [Source:HGNC Symbol;Acc:HGNC:6971]	0	0	0	0	3.15312	0	2.26668	0	-inf	-inf	0.000125828	0.00904586	down	yes
76606015	76611177	MSTRG.15209.5	2	628	MSTRG.15209	.	NA	NA	NA	NA	NA	0	0	0	0	10.6799	5.1463	0	0	-inf	-inf	0.000125986	0.00904586	down	yes
63637985	63755063	ENST00000624843	9	2154	MSTRG.34045	ARHGEF9	GO:0005085(guanyl-nucleotide exchange factor activity);GO:0005089(Rho guanyl-nucleotide exchange factor activity);GO:0005515(protein binding);GO:0005737(cytoplasm);GO:0005829(cytosol);GO:0005886(plasma membrane);GO:0007186(G protein-coupled receptor signaling pathway);GO:0014069(postsynaptic density);GO:0016020(membrane);GO:0030054(cell junction);GO:0035023(regulation of Rho protein signal transd…	NA	K20686	NA	Cdc42 guanine nucleotide exchange factor 9 [Source:HGNC Symbol;Acc:HGNC:14561]	0	0	0	0	2.13186	0	0	1.65961	-inf	-inf	0.000125991	0.00904586	down	yes
94110749	94116690	MSTRG.10113.9	5	596	MSTRG.10113	IFI27	NA	NA	NA	NA	NA	0	0.073007	0	0	1.40644	1.51039	2.13069	0.799478	0.0124862	-6.32352	0.000126012	0.00904586	down	yes
134531924	134583222	MSTRG.26796.20	11	7945	MSTRG.26796	JADE2	NA	NA	NA	NA	NA	0	0	0	0	0	0.435167	0	0.593147	-inf	-inf	0.000126108	0.00904586	down	yes
62238521	62296211	ENST00000358053	14	3936	MSTRG.20892	OSBPL2	GO:0005515(protein binding);GO:0005546(phosphatidylinositol-4,5-bisphosphate binding);GO:0005811(lipid droplet);GO:0005829(cytosol);GO:0006699(bile acid biosynthetic process);GO:0006869(lipid transport);GO:0008289(lipid binding);GO:0008526(phosphatidylinositol transporter activity);GO:0015248(sterol transporter activity);GO:0015485(cholesterol binding);GO:0015914(phospholipid transport);GO:001602…	NA	K20174	NA	oxysterol binding protein like 2 [Source:HGNC Symbol;Acc:HGNC:15761]	0	0	0	0	0	0.740955	0	1.78332	-inf	-inf	0.00012625	0.00904586	down	yes
35099776	35103195	ENST00000619795	9	1293	MSTRG.32473	STOML2	GO:0001772(immunological synapse);GO:0005102(signaling receptor binding);GO:0005515(protein binding);GO:0005737(cytoplasm);GO:0005739(mitochondrion);GO:0005743(mitochondrial inner membrane);GO:0005758(mitochondrial intermembrane space);GO:0005856(cytoskeleton);GO:0005886(plasma membrane);GO:0006851(mitochondrial calcium ion transmembrane transport);GO:0006874(cellular calcium ion homeostasis);GO:…	NA	NA	NA	stomatin like 2 [Source:HGNC Symbol;Acc:HGNC:14559]	0	0	2.47734	2.83084	0	0	0	0	inf	inf	0.000126375	0.00904586	up	yes
18260597	18266204	ENST00000395704	4	2879	MSTRG.13772	MIEF2	GO:0005515(protein binding);GO:0005739(mitochondrion);GO:0005741(mitochondrial outer membrane);GO:0007005(mitochondrion organization);GO:0010821(regulation of mitochondrion organization);GO:0016020(membrane);GO:0016021(integral component of membrane);GO:0032464(positive regulation of protein homooligomerization);GO:0042802(identical protein binding);GO:0090141(positive regulation of mitochondrial…	NA	NA	NA	mitochondrial elongation factor 2 [Source:HGNC Symbol;Acc:HGNC:17920]	0.694099	0.701063	0	0.180189	0	0	0	0.000189	8335.19	13.025	0.000126428	0.00904586	up	yes
39200345	39204720	ENST00000582193	6	792	MSTRG.14294	RPL19	GO:0000184(nuclear-transcribed mRNA catabolic process, nonsense-mediated decay);GO:0002181(cytoplasmic translation);GO:0003723(RNA binding);GO:0003735(structural constituent of ribosome);GO:0005515(protein binding);GO:0005622(intracellular);GO:0005829(cytosol);GO:0005840(ribosome);GO:0005925(focal adhesion);GO:0006412(translation);GO:0006413(translational initiation);GO:0006614(SRP-dependent cotr…	03010(Ribosome)	K02885	NA	ribosomal protein L19 [Source:HGNC Symbol;Acc:HGNC:10312]	0	0	0	0	0	8.61614	4.3631	0	-inf	-inf	0.000126742	0.00905764	down	yes
42272083	42331121	ENST00000523517	21	2378	MSTRG.31282	IKBKB	GO:0000166(nucleotide binding);GO:0002223(stimulatory C-type lectin receptor signaling pathway);GO:0002479(antigen processing and presentation of exogenous peptide antigen via MHC class I, TAP-dependent);GO:0002756(MyD88-independent toll-like receptor signaling pathway);GO:0004672(protein kinase activity);GO:0004674(protein serine/threonine kinase activity);GO:0005515(protein binding);GO:0005524(…	01523(Antifolate resistance);04010(MAPK signaling pathway);04014(Ras signaling pathway);04062(Chemokine signaling pathway);04064(NF-kappa B signaling pathway);04068(FoxO signaling pathway);04150(mTOR signaling pathway);04151(PI3K-Akt signaling pathway);04210(Apoptosis);04380(Osteoclast differentiation);04620(Toll-like receptor signaling pathway);04621(NOD-like receptor signaling pathway);04622(RI…	K07209	EC:2.7.11.10	inhibitor of nuclear factor kappa B kinase subunit beta [Source:HGNC Symbol;Acc:HGNC:5960]	0	0	0	0	0	1.71602	1.63007	0	-inf	-inf	0.000127966	0.00913437	down	yes
15319451	15335580	ENST00000333590	6	3652	MSTRG.33671	PIGA	GO:0000506(glycosylphosphatidylinositol-N-acetylglucosaminyltransferase (GPI-GnT) complex);GO:0005515(protein binding);GO:0005783(endoplasmic reticulum);GO:0005789(endoplasmic reticulum membrane);GO:0006506(GPI anchor biosynthetic process);GO:0008194(UDP-glycosyltransferase activity);GO:0009893(positive regulation of metabolic process);GO:0016020(membrane);GO:0016021(integral component of membran…	00563(Glycosylphosphatidylinositol (GPI)-anchor biosynthesis)	K03857	EC:2.4.1.198	phosphatidylinositol glycan anchor biosynthesis class A [Source:HGNC Symbol;Acc:HGNC:8957]	1.24542	0.432208	0.348246	2.05492	0.02461	0	0.076854	0.004292	38.5868	5.27004	0.000128343	0.00915057	up	yes
112231833	112269677	ENST00000309703	9	2337	MSTRG.25105	AP1AR	GO:0001920(negative regulation of receptor recycling);GO:0005768(endosome);GO:0005769(early endosome);GO:0005770(late endosome);GO:0005794(Golgi apparatus);GO:0005829(cytosol);GO:0015031(protein transport);GO:0019894(kinesin binding);GO:0030133(transport vesicle);GO:0034315(regulation of Arp2/3 complex-mediated actin nucleation);GO:0034613(cellular protein localization);GO:0035650(AP-1 adaptor co…	NA	NA	NA	adaptor related protein complex 1 associated regulatory protein [Source:HGNC Symbol;Acc:HGNC:28808]	0	0	0	0	1.16895	0	0	3.14625	-inf	-inf	0.000128832	0.00917465	down	yes
96741342	96774683	ENST00000437034	18	3377	MSTRG.26518	CAST	GO:0002020(protease binding);GO:0003723(RNA binding);GO:0004866(endopeptidase inhibitor activity);GO:0004869(cysteine-type endopeptidase inhibitor activity);GO:0005515(protein binding);GO:0005783(endoplasmic reticulum);GO:0005829(cytosol);GO:0010466(negative regulation of peptidase activity);GO:0010859(calcium-dependent cysteine-type endopeptidase inhibitor activity);GO:0016020(membrane);GO:00304…	NA	NA	NA	calpastatin [Source:HGNC Symbol;Acc:HGNC:1515]	0	0	0	0	0	3.04965	0.840098	0	-inf	-inf	0.000129662	0.00920959	down	yes
540105	548031	ENST00000637507	2	1482	MSTRG.11710	CAPN15	GO:0004198(calcium-dependent cysteine-type endopeptidase activity);GO:0005622(intracellular);GO:0005737(cytoplasm);GO:0006508(proteolysis);GO:0008233(peptidase activity);GO:0008234(cysteine-type peptidase activity);GO:0016787(hydrolase activity);GO:0046872(metal ion binding)	NA	K08582	EC:3.4.22.-	calpain 15 [Source:HGNC Symbol;Acc:HGNC:11182]	0	0	0	0	3.52507	1.87145	0	0	-inf	-inf	0.000129705	0.00920959	down	yes
134465	252470	ENST00000397962	15	2150	MSTRG.3342	ZMYND11	GO:0003677(DNA binding);GO:0003690(double-stranded DNA binding);GO:0003714(transcription corepressor activity);GO:0005515(protein binding);GO:0005634(nucleus);GO:0005654(nucleoplasm);GO:0005694(chromosome);GO:0006325(chromatin organization);GO:0007049(cell cycle);GO:0008270(zinc ion binding);GO:0008283(cell population proliferation);GO:0016020(membrane);GO:0016021(integral component of membrane);…	NA	K23218	NA	zinc finger MYND-type containing 11 [Source:HGNC Symbol;Acc:HGNC:16966]	0.480007	0.495709	0.270788	0	0	0	0	0	inf	inf	0.000129777	0.00920959	up	yes
111681267	111760256	ENST00000623148	27	3689	MSTRG.34304	ALG13	GO:0003723(RNA binding);GO:0003824(catalytic activity);GO:0004577(N-acetylglucosaminyldiphosphodolichol N-acetylglucosaminyltransferase activity);GO:0005783(endoplasmic reticulum);GO:0005789(endoplasmic reticulum membrane);GO:0006488(dolichol-linked oligosaccharide biosynthetic process);GO:0006508(proteolysis);GO:0008152(metabolic process);GO:0008233(peptidase activity);GO:0008234(cysteine-type p…	00510(N-Glycan biosynthesis)	K07432	EC:2.4.1.141	ALG13, UDP-N-acetylglucosaminyltransferase subunit [Source:HGNC Symbol;Acc:HGNC:30881]	0	0	0	0	0	0.720187	0	1.72262	-inf	-inf	0.000130151	0.00921889	down	yes
64165737	64300697	ENST00000561349	11	1756	MSTRG.11062	CSNK1G1	GO:0000166(nucleotide binding);GO:0004672(protein kinase activity);GO:0004674(protein serine/threonine kinase activity);GO:0005515(protein binding);GO:0005524(ATP binding);GO:0005634(nucleus);GO:0005737(cytoplasm);GO:0005829(cytosol);GO:0005886(plasma membrane);GO:0006468(protein phosphorylation);GO:0006897(endocytosis);GO:0016020(membrane);GO:0016021(integral component of membrane);GO:0016055(Wn…	04340(Hedgehog signaling pathway)	K08958	EC:2.7.11.1	casein kinase 1 gamma 1 [Source:HGNC Symbol;Acc:HGNC:2454]	0	0	0	0	1.81064	0	0	2.76593	-inf	-inf	0.000130563	0.00921889	down	yes
70819758	70839890	MSTRG.24766.4	11	2435	MSTRG.24766	GRSF1	NA	NA	NA	NA	NA	0	0	0	0	0	1.18453	0	3.24545	-inf	-inf	0.000130594	0.00921889	down	yes
113890093	113958589	MSTRG.18975.3	10	2342	MSTRG.18975	ACTR3	NA	NA	NA	NA	NA	0	0	0	0	3.03629	0	1.25074	0	-inf	-inf	0.000130598	0.00921889	down	yes
43607728	43619628	MSTRG.17292.3	3	1382	MSTRG.17292	ZNF428	NA	NA	NA	NA	NA	0	0.085441	0.028308	0.092393	5.46138	4.74062	1.43536	0.079601	0.0175935	-5.82882	0.000130666	0.00921889	down	yes
152335278	152381220	ENST00000471834	19	7229	MSTRG.29105	SYNE1	GO:0000932(P-body);GO:0003723(RNA binding);GO:0003779(actin binding);GO:0005515(protein binding);GO:0005521(lamin binding);GO:0005634(nucleus);GO:0005635(nuclear envelope);GO:0005640(nuclear outer membrane);GO:0005654(nucleoplasm);GO:0005730(nucleolus);GO:0005737(cytoplasm);GO:0005794(Golgi apparatus);GO:0005856(cytoskeleton);GO:0006997(nucleus organization);GO:0007030(Golgi organization);GO:0007…	NA	K19326	NA	spectrin repeat containing nuclear envelope protein 1 [Source:HGNC Symbol;Acc:HGNC:17089]	2.13096	1.98834	1.71166	1.84944	0.145679	0.026499	0.231705	0.147591	13.9271	3.79982	0.000130864	0.00921917	up	yes
73519956	73609700	ENST00000651057	12	2749	MSTRG.18540	ALMS1	GO:0000086(G2/M transition of mitotic cell cycle);GO:0000922(spindle pole);GO:0003674(molecular_function);GO:0005515(protein binding);GO:0005623(cell);GO:0005737(cytoplasm);GO:0005813(centrosome);GO:0005814(centriole);GO:0005815(microtubule organizing center);GO:0005829(cytosol);GO:0005856(cytoskeleton);GO:0005929(cilium);GO:0010389(regulation of G2/M transition of mitotic cell cycle);GO:0016197(…	NA	K16741	NA	ALMS1, centrosome and basal body associated protein [Source:HGNC Symbol;Acc:HGNC:428]	0	0	0	0	0.307344	0.278916	0	0.424895	-inf	-inf	0.000130976	0.00921917	down	yes
304176	434857	ENST00000505113	11	2173	MSTRG.25679	AHRR	GO:0000122(negative regulation of transcription by RNA polymerase II);GO:0000981(DNA-binding transcription factor activity, RNA polymerase II-specific);GO:0003677(DNA binding);GO:0005509(calcium ion binding);GO:0005515(protein binding);GO:0005634(nucleus);GO:0005654(nucleoplasm);GO:0005737(cytoplasm);GO:0005829(cytosol);GO:0006355(regulation of transcription, DNA-templated);GO:0006805(xenobiotic …	NA	K09094	NA	aryl-hydrocarbon receptor repressor [Source:HGNC Symbol;Acc:HGNC:346]	0	0	0	0	3.74103	0	1.42059	0	-inf	-inf	0.000131124	0.00921917	down	yes
232525993	232536667	ENST00000441621	11	3022	MSTRG.20031	CHRND	GO:0003009(skeletal muscle contraction);GO:0004888(transmembrane signaling receptor activity);GO:0005216(ion channel activity);GO:0005230(extracellular ligand-gated ion channel activity);GO:0005654(nucleoplasm);GO:0005829(cytosol);GO:0005886(plasma membrane);GO:0005887(integral component of plasma membrane);GO:0005892(acetylcholine-gated channel complex);GO:0006811(ion transport);GO:0006812(catio…	04080(Neuroactive ligand-receptor interaction)	K04816	NA	cholinergic receptor nicotinic delta subunit [Source:HGNC Symbol;Acc:HGNC:1965]	2.83761	3.22869	2.82567	3.07148	0.413886	0.100756	0.141857	0.047263	16.9993	4.0874	0.000131494	0.00922029	up	yes
5527156	5530601	ENST00000425660	7	1845	MSTRG.29308	ACTB	GO:0000079(regulation of cyclin-dependent protein serine/threonine kinase activity);GO:0000166(nucleotide binding);GO:0000790(nuclear chromatin);GO:0000978(RNA polymerase II proximal promoter sequence-specific DNA binding);GO:0000980(RNA polymerase II distal enhancer sequence-specific DNA binding);GO:0001895(retina homeostasis);GO:0005200(structural constituent of cytoskeleton);GO:0005515(protein…	04015(Rap1 signaling pathway);04145(Phagosome);04210(Apoptosis);04390(Hippo signaling pathway);04510(Focal adhesion);04520(Adherens junction);04530(Tight junction);04611(Platelet activation);04670(Leukocyte transendothelial migration);04714(Thermogenesis);04810(Regulation of actin cytoskeleton);04919(Thyroid hormone signaling pathway);04921(Oxytocin signaling pathway);04971(Gastric acid secretion…	NA	NA	actin beta [Source:HGNC Symbol;Acc:HGNC:132]	0.005239	0	0	0	0.481286	0	0	45.7407	0.000113344	-13.107	0.000131516	0.00922029	down	yes
3575358	3580901	ENST00000406376	7	704	MSTRG.17836	RPS7	GO:0000184(nuclear-transcribed mRNA catabolic process, nonsense-mediated decay);GO:0001843(neural tube closure);GO:0003723(RNA binding);GO:0003730(mRNA 3'-UTR binding);GO:0003735(structural constituent of ribosome);GO:0005515(protein binding);GO:0005622(intracellular);GO:0005634(nucleus);GO:0005654(nucleoplasm);GO:0005730(nucleolus);GO:0005737(cytoplasm);GO:0005813(centrosome);GO:0005815(microtub…	03010(Ribosome)	K02993	NA	ribosomal protein S7 [Source:HGNC Symbol;Acc:HGNC:10440]	7.27893	3.68804	0	0	0	0	0	0	inf	inf	0.000131595	0.00922029	up	yes
61322664	61550976	ENST00000555082	14	2932	MSTRG.9706	PRKCH	GO:0000166(nucleotide binding);GO:0004672(protein kinase activity);GO:0004674(protein serine/threonine kinase activity);GO:0004697(protein kinase C activity);GO:0005515(protein binding);GO:0005524(ATP binding);GO:0005737(cytoplasm);GO:0005829(cytosol);GO:0005886(plasma membrane);GO:0006468(protein phosphorylation);GO:0007165(signal transduction);GO:0010744(positive regulation of macrophage derive…	04270(Vascular smooth muscle contraction);04750(Inflammatory mediator regulation of TRP channels)	NA	NA	protein kinase C eta [Source:HGNC Symbol;Acc:HGNC:9403]	0.290442	0	0.137344	0.521582	0	0	0	0	inf	inf	0.0001318	0.00922401	up	yes
26244926	26290412	ENST00000405867	14	1588	MSTRG.18018	HADHB	GO:0003723(RNA binding);GO:0003824(catalytic activity);GO:0003857(3-hydroxyacyl-CoA dehydrogenase activity);GO:0003988(acetyl-CoA C-acyltransferase activity);GO:0004300(enoyl-CoA hydratase activity);GO:0005515(protein binding);GO:0005739(mitochondrion);GO:0005740(mitochondrial envelope);GO:0005741(mitochondrial outer membrane);GO:0005743(mitochondrial inner membrane);GO:0005783(endoplasmic reticu…	00062(Fatty acid elongation);00071(Fatty acid degradation);00280(Valine, leucine and isoleucine degradation)	K07509	EC:2.3.1.16	hydroxyacyl-CoA dehydrogenase trifunctional multienzyme complex subunit beta [Source:HGNC Symbol;Acc:HGNC:4803]	0	0	0	0	0	0	9.55119	1.3354	-inf	-inf	0.000133343	0.00931996	down	yes
56890521	56891526	ENST00000573108	2	952	MSTRG.14799	TRIM25	GO:0002376(immune system process);GO:0003723(RNA binding);GO:0005515(protein binding);GO:0005654(nucleoplasm);GO:0005737(cytoplasm);GO:0005829(cytosol);GO:0006511(ubiquitin-dependent protein catabolic process);GO:0006513(protein monoubiquitination);GO:0008270(zinc ion binding);GO:0016032(viral process);GO:0016567(protein ubiquitination);GO:0016604(nuclear body);GO:0016740(transferase activity);GO…	04064(NF-kappa B signaling pathway);04622(RIG-I-like receptor signaling pathway);05164(Influenza A)	K10652	EC:2.3.2.27	tripartite motif containing 25 [Source:HGNC Symbol;Acc:HGNC:12932]	1.22201	0	0.619503	0.838943	0	0	0	0	inf	inf	0.000133477	0.00931996	up	yes
58301248	58312216	ENST00000580669	16	4175	MSTRG.14837	TSPOAP1	GO:0005515(protein binding);GO:0005737(cytoplasm);GO:0005739(mitochondrion);GO:0005829(cytosol);GO:0006700(C21-steroid hormone biosynthetic process);GO:0007269(neurotransmitter secretion);GO:0008150(biological_process);GO:0014047(glutamate secretion);GO:0030156(benzodiazepine receptor binding);GO:0044305(calyx of Held);GO:0098978(glutamatergic synapse);GO:0099509(regulation of presynaptic cytosol…	NA	K19922	NA	TSPO associated protein 1 [Source:HGNC Symbol;Acc:HGNC:16831]	0.139128	0	0.223695	0.239481	0	0	0	0	inf	inf	0.000133779	0.0093303	up	yes
5024872	5033918	ENST00000562746	11	2260	MSTRG.12003	NAGPA	GO:0003944(N-acetylglucosamine-1-phosphodiester alpha-N-acetylglucosaminidase activity);GO:0005515(protein binding);GO:0005794(Golgi apparatus);GO:0005975(carbohydrate metabolic process);GO:0006464(cellular protein modification process);GO:0006486(protein glycosylation);GO:0006622(protein targeting to lysosome);GO:0007040(lysosome organization);GO:0016020(membrane);GO:0016021(integral component o…	04142(Lysosome)	K01125	EC:3.1.4.45	N-acetylglucosamine-1-phosphodiester alpha-N-acetylglucosaminidase [Source:HGNC Symbol;Acc:HGNC:17378]	0	0	0	0	2.98857	0	0	1.10443	-inf	-inf	0.000133992	0.0093345	down	yes
111120914	111168445	ENST00000610735	4	5120	MSTRG.18917	BCL2L11	GO:0001701(in utero embryonic development);GO:0001776(leukocyte homeostasis);GO:0001782(B cell homeostasis);GO:0001783(B cell apoptotic process);GO:0001822(kidney development);GO:0001844(protein insertion into mitochondrial membrane involved in apoptotic signaling pathway);GO:0002260(lymphocyte homeostasis);GO:0002262(myeloid cell homeostasis);GO:0005515(protein binding);GO:0005737(cytoplasm);GO:…	01521(EGFR tyrosine kinase inhibitor resistance);04068(FoxO signaling pathway);04151(PI3K-Akt signaling pathway);04210(Apoptosis);04215(Apoptosis - multiple species);04932(Non-alcoholic fatty liver disease (NAFLD));05169(Epstein-Barr virus infection);05200(Pathways in cancer);05206(MicroRNAs in cancer);05210(Colorectal cancer)	NA	NA	BCL2 like 11 [Source:HGNC Symbol;Acc:HGNC:994]	0	0	0	0	0	2.75416	0.406078	0	-inf	-inf	0.000134149	0.00933473	down	yes
116862600	116918188	ENST00000426421	10	1214	MSTRG.30445	CAPZA2	GO:0003779(actin binding);GO:0005576(extracellular region);GO:0005829(cytosol);GO:0005903(brush border);GO:0006888(endoplasmic reticulum to Golgi vesicle-mediated transport);GO:0007596(blood coagulation);GO:0008290(F-actin capping protein complex);GO:0015629(actin cytoskeleton);GO:0016020(membrane);GO:0016021(integral component of membrane);GO:0019886(antigen processing and presentation of exogen…	04144(Endocytosis)	NA	NA	capping actin protein of muscle Z-line subunit alpha 2 [Source:HGNC Symbol;Acc:HGNC:1490]	3.01703	0	2.5373	0	0	0	0	0	inf	inf	0.000134517	0.00934965	up	yes
70243751	70353913	ENST00000551043	16	2288	MSTRG.7680	CNOT2	GO:0000122(negative regulation of transcription by RNA polymerase II);GO:0000289(nuclear-transcribed mRNA poly(A) tail shortening);GO:0000932(P-body);GO:0001226(RNA polymerase II transcription corepressor binding);GO:0001829(trophectodermal cell differentiation);GO:0003712(transcription coregulator activity);GO:0004535(poly(A)-specific ribonuclease activity);GO:0005515(protein binding);GO:0005634…	03018(RNA degradation)	K12605	NA	CCR4-NOT transcription complex subunit 2 [Source:HGNC Symbol;Acc:HGNC:7878]	0	0	0	0	0.814536	0	0	6.96706	-inf	-inf	0.000134707	0.00935213	down	yes
94419876	94493874	ENST00000323977	19	2588	MSTRG.6041	MRE11	GO:0000014(single-stranded DNA endodeoxyribonuclease activity);GO:0000019(regulation of mitotic recombination);GO:0000723(telomere maintenance);GO:0000724(double-strand break repair via homologous recombination);GO:0000729(DNA double-strand break processing);GO:0000781(chromosome, telomeric region);GO:0000784(nuclear chromosome, telomeric region);GO:0003677(DNA binding);GO:0003690(double-stranded…	03440(Homologous recombination);03450(Non-homologous end-joining);04218(Cellular senescence)	K10865	NA	MRE11 homolog, double strand break repair nuclease [Source:HGNC Symbol;Acc:HGNC:7230]	0	0	0	0	1.02597	0	0	2.07289	-inf	-inf	0.000134946	0.00935807	down	yes
[truncated: 2,908 more rows]
