# Supplementary material for: Comprehensive analysis of TGF-β-induced mRNAs and ncRNAs in hepatocellular carcinoma
Source: Aging (Albany NY). 2020 Oct 4;12(19):19399–420. doi: 10.18632/aging.103826 (PMC7732333; doi:10.18632/aging.103826)
Supplement: Supplementary Table 3 [file aging-12-103826-s004..xlsx]

## Sheet: Sheet1
Supplementary Table 3. Differentially expressed miRNAs upon treatment with TGF-β.
Index	miR_name	miR_seq	up/down	fold_change(TGFÎ²(mean)/DMSO(mean))	log2(fold_change)	pvalue(t_test)	DMSO(mean)	TGFÎ²(mean)	DMSO/DMSO_1(norm)	DMSO/DMSO_2(norm)	DMSO/DMSO_3(norm)	DMSO/DMSO_4(norm)	TGFÎ²/TGFÎ²_1(norm)	TGFÎ²/TGFÎ²_2(norm)	TGFÎ²/TGFÎ²_3(norm)	TGFÎ²/TGFÎ²_4(norm)	DMSO/DMSO_1(raw)	DMSO/DMSO_2(raw)	DMSO/DMSO_3(raw)	DMSO/DMSO_4(raw)	TGFÎ²/TGFÎ²_1(raw)	TGFÎ²/TGFÎ²_2(raw)	TGFÎ²/TGFÎ²_3(raw)	TGFÎ²/TGFÎ²_4(raw)	Expression level
1	ssc-mir-1285-p5	ATCGCGCCTGTGAATAGCCACTG	down	0.130779	-2.9348	1.43463e-05	302.637	39.5785	331.223	324.981	283.779	270.566	20.9324	12.9102	50.6899	73.7813	336	341	253	210	21	12	78	66.5	middle
2	hsa-miR-330-5p_R-1	TCTCTGGGCCTGTGTCTTAGG	down	0.51479	-0.957945	8.26735e-05	343.297	176.726	334.181	341.182	349.957	347.871	196.366	154.922	185.863	169.753	339	358	312	270	197	144	286	153	middle
3	hsa-miR-323b-3p_R-1	CCCAATACACGGTCGACCTCT	up	inf	inf	0.000156905	0	54.4784	0	0	0	0	59.807	51.6408	56.5387	49.9272	0	0	0	0	60	48	87	45	middle
4	hsa-miR-222-3p_R+3	AGCTACATCTGGCTACTGGGTCTC	up	1.28546	0.36228	0.000286616	60215.4	77404.2	60049	64408.1	58339.6	58064.7	73117	81368.6	78068.9	77062.1	60915	67583	52012	45067	73353	75632	120130	69457	high
5	hsa-miR-184	TGGACGGAGAACTGATAAGGGT	up	inf	inf	0.000323537	0	8.63039	0	0	0	0	7.97427	9.68264	9.09819	7.76645	0	0	0	0	8	9	14	7	low
6	hsa-miR-675-5p_R+1	TGGTGCGGAGAGGGCCCACAGTGT	down	0.325621	-1.61874	0.000795831	5312.31	1729.8	5164.52	6155.57	5411.99	4517.16	1707.49	1591.18	1547.99	2072.53	5239	6459	4825	3506	1713	1479	2382	1868	high
7	hsa-miR-181c-3p_L-1R+1	ACCATCGACCGTTGAGTGGACC	up	2.23114	1.15778	0.000840389	190.12	424.185	250.389	208.712	148.059	153.321	381.768	414.202	506.899	393.87	254	219	132	119	383	385	780	355	middle
8	hsa-mir-3648-1-p3	CTGCGGTCGGCCGCGCTCG	down	0.109201	-3.19495	0.00108672	22.82	2.49196	22.673	28.5907	16.8248	23.1914	9.96783	0	0	0	23	30	15	18	10	0	0	0	middle
9	PC-5p-23176_79	GTGGCACAGGCCAGGGGGTA	up	23.8536	4.57614	0.00127735	1.23223	29.3931	4.92892	0	0	0	24.9196	38.7306	27.2946	26.6278	5	0	0	0	25	36	42	24	middle
10	hsa-miR-139-5p	TCTACAGTGCACGTGTCTCCAGT	up	2.52808	1.33804	0.00144419	167.695	423.946	141.953	170.591	146.937	211.299	419.646	359.334	404.219	512.586	144	179	131	164	421	334	622	462	middle
11	hsa-miR-10400-5p_R-3_1ss12GA	CGGCGGCGGCGACTCTGG	down	0.140532	-2.83103	0.00151516	29.8171	4.19025	29.5735	34.3088	34.7714	20.6145	5.9807	7.53094	3.24935	0	30	36	31	16	6	7	5	0	middle
12	PC-5p-38055_37	TGTTGTAAGCCCTCTGAGT	up	inf	inf	0.00165477	0	8.66114	0	0	0	0	8.97105	10.7585	7.14858	7.76645	0	0	0	0	9	10	11	7	middle
13	PC-5p-26454_66	ATTCCCACATCAGGCACCA	up	inf	inf	0.0017278	0	15.5494	0	0	0	0	14.9517	19.3653	12.3475	15.5329	0	0	0	0	15	18	19	14	middle
14	hsa-miR-935_L-1	CAGTTACCGCTTCCGCTACCGC	up	4.9768	2.31522	0.00187814	60.281	300.006	60.1328	33.3558	72.9077	74.7277	324.951	250.673	256.049	368.352	61	35	65	58	326	233	394	332	middle
15	PC-3p-32680_48	TGGACGATCAGGATCAGGA	up	7.95021	2.99099	0.00230345	1.19128	9.4709	0	4.76511	0	0	6.97748	9.68264	12.3475	8.87595	0	5	0	0	7	9	19	8	middle
16	hsa-miR-487b-3p	AATCGTACAGGGTCATCCACTT	up	inf	inf	0.00230852	0	45.8839	0	0	0	0	35.8842	39.8064	54.5891	53.2557	0	0	0	0	36	37	84	48	middle
17	hsa-miR-181a-3p	ACCATCGACCGTTGATTGTACC	up	2.78198	1.47611	0.00234219	445.604	1239.66	514.579	526.068	418.378	323.391	1083.5	1281.34	1529.8	1064	522	552	373	251	1087	1191	2354	959	middle
18	hsa-miR-323a-3p_L+1	GCACATTACACGGTCGACCTCT	up	inf	inf	0.00307153	0	152.565	0	0	0	0	145.53	137.709	202.76	124.263	0	0	0	0	146	128	312	112	middle
19	hsa-miR-218-5p_R+1	TTGTGCTTGATCTAACCATGTG	up	3.74747	1.90592	0.00328182	5.76884	21.6186	3.45024	9.53022	10.0949	0	24.4212	22.0549	25.02	14.9782	3.5	10	9	0	24.5	20.5	38.5	13.5	middle
20	hsa-miR-485-3p_L+1	AGTCATACACGGCTCTCCTCTCT	up	inf	inf	0.00340826	0	55.7932	0	0	0	0	71.7684	50.5649	59.7881	41.0513	0	0	0	0	72	47	92	37	middle
21	hsa-miR-409-3p	GAATGTTGCTCGGTGAACCCCT	up	inf	inf	0.00345844	0	136.14	0	0	0	0	114.63	152.771	172.866	104.292	0	0	0	0	115	142	266	94	middle
22	hsa-miR-342-5p_R+2	AGGGGTGCTATCTGTGATTGAGG	up	2.05105	1.03636	0.00346191	24.7431	50.7493	29.5735	26.6846	24.6764	18.0377	45.852	48.4132	45.4909	63.2411	30	28	22	14	46	45	70	57	middle
23	bta-mir-2904-2-p3	CTCGGATAGCCGGTCCCCCG	down	0.47925	-1.06115	0.00351613	474.218	227.269	548.096	406.94	441.933	499.903	174.437	348.575	193.012	193.052	556	427	394	388	175	324	297	174	middle
24	hsa-miR-129-1-3p	AAGCCCTTACCCCAAAAAGTAT	up	3.33891	1.73938	0.00390608	57.7478	192.815	32.5309	60.0404	48.2312	90.1887	147.524	166.219	211.208	246.308	33	63	43	70	148	154.5	325	222	middle
25	hsa-miR-181d-3p_L+1R-1	CCCACCGGGGGATGAATGTCA	up	8.50748	3.08873	0.00414285	3.09732	26.3504	0	12.3893	0	0	25.9164	27.9721	25.9948	25.5184	0	13	0	0	26	26	40	23	middle
26	bta-mir-2904-2-p5	CCTCGGTTGGCCTCGGATAGCCGGTC	up	2.21359	1.14639	0.00444005	326.827	723.46	295.735	296.39	293.874	421.31	609.035	616.462	797.391	870.952	300	311	262	327	611	573	1227	785	middle
27	hsa-miR-548av-5p_R+4	AAAAGTACTTGCGGATTTTGCT	up	1.83388	0.874903	0.00534205	25.4578	46.6867	22.673	27.6376	34.7714	16.7493	43.8585	44.1098	53.2894	45.4892	23	29	31	13	44	41	82	41	middle
28	hsa-miR-455-5p	TATGTGCCTTTGGACTACATCG	up	2.30202	1.2029	0.00601982	85.3007	196.364	112.379	119.128	59.4478	50.248	188.392	250.673	191.062	155.329	114	125	53	39	189	233	294	140	middle
29	hsa-miR-181a-2-3p	ACCACTGACCGTTGACTGTACC	up	1.62043	0.696381	0.00605166	2351.55	3810.54	2976.08	2317.75	1882.14	2230.24	3817.68	3666.49	4512.7	3245.27	3019	2432	1678	1731	3830	3408	6944	2925	middle
30	hsa-miR-410-3p	AATATAACACAGATGGCCTGT	up	14.9926	3.90618	0.00640083	1.93261	28.9749	0	0	0	7.73046	28.9067	39.8064	30.5439	16.6424	0	0	0	6	29	37	47	15	middle
31	ssc-miR-30a-3p_R+1	CTTTCAGTCGGATGTTTGCAGCC	up	1.9544	0.966726	0.00807954	35.6247	69.6248	42.3887	40.9799	26.9198	32.2102	66.7845	76.3853	83.1834	52.1462	43	43	24	25	67	71	128	47	middle
32	mmu-miR-1983	CTCACCTGGAGCATGTTTTCT	up	1.71776	0.780528	0.00865624	108.106	185.699	107.45	132.47	117.774	74.7277	189.389	192.577	217.707	143.125	109	139	105	58	190	179	335	129	middle
33	hsa-miR-3184-5p_R-1	TGAGGGGCCTCAGACCGAGCTTT	down	0.655028	-0.610371	0.00882275	85.5416	56.0321	91.6779	86.725	68.4211	95.3423	66.7845	52.7166	59.1382	45.4892	93	91	61	74	67	49	91	41	middle
34	hsa-miR-654-3p_R-2	TATGTCTGCTGACCATCACC	up	inf	inf	0.00909875	0	116.582	0	0	0	0	135.563	121.571	148.17	61.0221	0	0	0	0	136	113	228	55	middle
35	hsa-miR-383-5p	AGATCAGAAGGTGATTGTGGCT	down	0.267395	-1.90295	0.0093412	26.8921	7.19082	18.7299	30.4967	23.5548	34.7871	4.98392	6.45509	8.44832	8.87595	19	32	21	27	5	6	13	8	middle
36	hsa-miR-329-3p	AACACACCTGGTTAACCTCTTT	up	inf	inf	0.00966764	0	58.2731	0	0	0	0	51.8327	54.3304	86.4328	40.4965	0	0	0	0	52	50.5	133	36.5	middle
37	hsa-mir-663a-p3	CGTGTCTGTGGCGGTGGGATCCCGCG	down	-inf	-inf	0.00970225	19.5147	0	12.8152	27.6376	15.7032	21.903	0	0	0	0	13	29	14	17	0	0	0	0	middle
38	hsa-miR-543	AAACATTCGCGGTGCACTTCTT	up	176.772	7.46574	0.00988701	1.23223	217.823	4.92892	0	0	0	235.241	149.543	314.537	171.971	5	0	0	0	236	139	484	155	middle
39	hsa-miR-12135_1ss9TC	TAAAGGTTCGTTTGTAAA	down	-inf	-inf	0.00993476	11.5734	0	14.7868	10.4832	14.5815	6.44205	0	0	0	0	15	11	13	5	0	0	0	0	middle
40	hsa-miR-365a-5p	AGGGACTTTTGGGGGCAGATGTG	up	1.70032	0.765804	0.0100846	214.197	364.204	221.801	217.289	171.613	246.086	366.816	280.797	430.864	378.337	225	228	153	191	368	261	663	341	middle
41	hsa-miR-6501-5p_R+1	AGTTGCCAGGGCTGCCTTTGGTG	up	4.27834	2.09705	0.0111822	4.60587	19.7055	12.8152	0	5.60828	0	20.9324	15.0619	27.2946	15.5329	13	0	5	0	21	14	42	14	middle
42	hsa-miR-2682-5p_L-3R+1	GCAGTGACTGTTCAGACGTCC	up	1.78464	0.835629	0.0114423	20.1379	35.9388	28.5877	20.9665	16.8248	14.1725	34.8874	38.7306	35.7429	34.3943	29	22	15	11	35	36	55	31	middle
43	bta-mir-2887-1-p3_1ss11AT_1	CGGTGCGGAGTGCCCTTCGT	up	3.60855	1.85142	0.0114593	23.9238	86.3302	15.2796	31.9262	29.1631	19.3261	83.7298	82.3025	59.4632	119.825	15.5	33.5	26	15	84	76.5	91.5	108	middle
44	bta-mir-2887-1-p3_1ss11AT_2	CGGTGCGGAGTGCCCTTCGTC	up	3.60855	1.85142	0.0114593	23.9238	86.3302	15.2796	31.9262	29.1631	19.3261	83.7298	82.3025	59.4632	119.825	15.5	33.5	26	15	84	76.5	91.5	108	middle
45	hsa-miR-1185-1-3p	ATATACAGGGGGAGACTCTTAT	up	inf	inf	0.0120404	0	5.33375	0	0	0	0	2.99035	5.37925	5.19896	7.76645	0	0	0	0	3	5	8	7	low
46	hsa-miR-409-5p	AGGTTACCCGAGCAACTTTGCAT	up	inf	inf	0.0121625	0	31.8546	0	0	0	0	26.9131	35.503	46.1408	18.8614	0	0	0	0	27	33	71	17	middle
47	PC-5p-15892_130	AAAAAGACACCCCCCAACCA	down	0.141554	-2.82058	0.0127598	31.3207	4.43357	23.6588	19.0604	42.623	39.9407	9.96783	0	0	7.76645	24	20	38	31	10	0	0	7	middle
48	hsa-miR-4508_L+2	AAGCGGGGCTGGGCGCGCG	down	0.168804	-2.56658	0.0134777	112.151	18.9316	64.0759	101.02	146.937	136.571	28.9067	9.68264	14.947	22.1899	65	106	131	106	29	9	23	20	middle
49	PC-5p-27268_63	CGGCTCACCGGCTTCACGT	down	-inf	-inf	0.0136099	21.9175	0	21.6872	14.2953	33.6497	18.0377	0	0	0	0	22	15	30	14	0	0	0	0	middle
50	hsa-miR-381-3p	TATACAAGGGCAAGCTCTCTGT	up	inf	inf	0.0139182	0	17.9451	0	0	0	0	10.9646	26.8962	19.4961	14.4234	0	0	0	0	11	25	30	13	middle
51	hsa-miR-3200-3p_R+1	CACCTTGCGCTACTCAGGTCTGC	down	0.513932	-0.96035	0.0145943	704.967	362.305	769.897	664.256	532.787	852.927	351.865	373.32	337.933	386.104	781	697	475	662	353	347	520	348	middle
52	PC-3p-45710_26	CAGTCTTGCTTTGTCACCCATGA	up	inf	inf	0.0146482	0	6.3247	0	0	0	0	8.97105	7.53094	3.24935	5.54747	0	0	0	0	9	7	5	5	low
53	hsa-miR-9898_R+1	TACTTACCTGTCCCCTACCCCAC	up	2.10291	1.07239	0.0151888	21.873	45.9971	11.8294	32.4027	12.3382	30.9218	51.8327	45.1857	37.0426	49.9272	12	34	11	24	52	42	57	45	middle
54	hsa-miR-505-3p_R+2	CGTCAACACTTGCTGGTTTCCTCT	down	0.667381	-0.583417	0.0151972	6057.09	4042.39	5464.2	5725.76	5600.43	7437.99	3985.14	4128.03	3511.9	4544.49	5543	6008	4993	5773	3998	3837	5404	4096	high
55	PC-5p-728_6738	AACCCGGTCAGCCCCTCTCCG	down	0.225062	-2.1516	0.0156018	1364.65	307.132	920.229	952.545	1783.99	1801.84	214.308	119.419	223.555	671.244	933.5	999.5	1590.5	1398.5	215	111	344	605	middle
56	hsa-miR-181d-5p_R+1	AACATTCATTGTTGTCGGTGGGTT	up	1.77713	0.829551	0.01635	865.317	1537.78	846.788	1059.28	912.281	642.916	1107.43	1512.46	1668.22	1863.02	859	1111.5	813.333	499	1111	1405.83	2567	1679.17	middle
57	pal-miR-9993a-3p	ATCTCGGTGGGACCTCCA	down	0.466325	-1.10059	0.0167636	913.18	425.838	1190.83	954.452	870.966	636.474	658.874	254.438	470.506	319.534	1208	1001.5	776.5	494	661	236.5	724	288	middle
58	ptr-miR-1233_L+1R+1	CTGAGCCCTGTCCTCCCGCAGT	up	3.6218	1.85671	0.0172087	1.29667	4.6963	0	2.38256	2.80414	0	3.48874	3.76547	4.87403	6.65696	0	2.5	2.5	0	3.5	3.5	7.5	6	low
59	hsa-miR-382-5p	GAAGTTGTTCGTGGTGGATTCG	up	inf	inf	0.0172391	0	13.8708	0	0	0	0	14.9517	16.1377	18.8462	5.54747	0	0	0	0	15	15	29	5	middle
60	hsa-miR-4454_L-3R+1	TCCGAGTCACGGCACCAA	down	0.0539458	-4.21234	0.0175846	3224.9	173.97	2131.26	2122.38	4042.45	4603.49	120.611	249.597	76.0349	249.636	2162	2227	3604	3573	121	232	117	225	middle
61	hsa-miR-619-5p_L+1R-1_1ss17AG	TGCTGGGATTACAGGCGTGAGC	up	6.30346	2.65614	0.0190522	1.19128	7.50917	0	4.76511	0	0	11.9614	5.37925	7.14858	5.54747	0	5	0	0	12	5	11	5	middle
62	hsa-miR-10399-3p_L+1_1ss22CT	TCTCTCGGACAAGCTGTAGGTT	down	0.419804	-1.25221	0.0203222	164.894	69.2233	161.669	221.101	166.005	110.803	72.7652	55.9442	83.8333	64.3506	164	232	148	86	73	52	129	58	middle
63	hsa-miR-139-3p	TGGAGACGCGGCCCTGTTGGAGT	up	5.03144	2.33097	0.0204798	2.25472	11.3445	0	0	0	9.01887	11.9614	15.0619	11.6977	6.65696	0	0	0	7	12	14	18	6	middle
64	hsa-miR-9901_L+5R-2	CGTCCCGGTCGCCGCGGTTCGCCG	down	0.0377092	-4.72894	0.0207332	243.968	9.19983	144.91	187.745	257.981	385.234	4.98392	15.0619	4.54909	12.2044	147	197	230	299	5	14	7	11	middle
65	hsa-miR-222-5p_R-1	CTCAGTAGCCAGTGTAGATCC	up	1.77544	0.828178	0.0210773	16.6986	29.6473	7.88627	20.0135	15.7032	23.1914	27.9099	25.8204	33.7933	31.0658	8	21	14	18	28	24	52	28	middle
66	PC-3p-3317_937	GAATTATAACTCGGTGCTCTGT	up	1.32759	0.408813	0.021221	157.347	208.892	188.285	166.779	148.059	126.264	202.347	214.094	229.404	189.723	191	175	132	98	203	199	353	171	middle
67	hsa-miR-29b-2-5p_R+1	CTGGTTTCACATGGTGGCTTAGA	down	0.578052	-0.790728	0.0213733	89.3064	51.6238	103.507	101.02	90.8542	61.8436	57.8134	39.8064	57.8385	51.0367	105	106	81	48	58	37	89	46	middle
68	PC-5p-13745_156	ATTCCCACTGTCCCTACCTAT	down	0.552418	-0.856169	0.0240429	50.6717	27.9919	40.4171	41.933	57.2045	63.1321	26.9131	24.7445	29.2442	31.0658	41	44	51	49	27	23	45	28	middle
69	hsa-miR-345-5p	GCTGACTCCTAGTCCAGGGCTC	up	1.59115	0.67007	0.024226	573.225	912.086	546.124	526.068	550.733	669.973	978.841	1129.64	760.998	778.864	554	552	491	520	982	1050	1171	702	middle
70	hsa-miR-663a_L-3R+1	CGGGGCGCCGCGGGACCGCC	down	-inf	-inf	0.0248816	19.953	0	16.7583	8.5772	23.5548	30.9218	0	0	0	0	17	9	21	24	0	0	0	0	middle
71	hsa-miR-330-3p	GCAAAGCACACGGCCTGCAGAGA	down	0.455594	-1.13418	0.0252434	13693.8	6238.8	16338.4	17366	10450.5	10620.4	6218.93	6927.39	6355.73	5453.16	16574	18222	9317	8243	6239	6439	9780	4915	high
72	mmu-miR-7689-3p	TTAGAGCCAGACTGCCTGGGTTT	up	1.7335	0.793689	0.0256237	22.271	38.6067	32.5309	15.2484	16.8248	24.4798	48.8424	31.1996	34.4431	39.9418	33	16	15	19	49	29	53	36	middle
73	hsa-miR-4485-3p_R+2	TAACGGCCGCGGTACCCTAACC	up	2.17646	1.12198	0.0260404	297.173	646.786	390.37	227.772	200.777	369.773	614.019	881.12	672.616	419.389	396	239	179	287	616	819	1035	378	middle
74	hsa-miR-2277-5p_R-1	AGCGCGGGCTGAGCGCTGCCAGT	down	0.559623	-0.837473	0.0265589	239.547	134.056	297.707	278.282	185.073	197.127	153.505	138.785	142.972	100.964	302	292	165	153	154	129	220	91	middle
75	hsa-miR-2110_R+1	TTGGGGAAACGGCCGCTGAGTGA	down	0.788285	-0.343211	0.0269999	538.004	424.101	494.863	523.209	510.354	623.59	468.488	356.106	411.368	460.44	502	549	455	484	470	331	633	415	middle
76	hsa-miR-1915-5p_L+1R+1	CACCTTGCCTTGCTGCCCGGGCCT	up	7.84433	2.97165	0.0272813	7.19991	56.4785	0	0	5.60828	23.1914	33.8906	69.9302	34.4431	87.65	0	0	5	18	34	65	53	79	middle
77	bta-miR-378_R+2	ACTGGACTTGGAGTCAGAAGGCTA	down	0.537976	-0.894386	0.0276886	17.553	9.44309	17.7441	19.0604	17.9465	15.4609	4.98392	11.8343	14.2972	6.65696	18	20	16	12	5	11	22	6	middle
78	PC-3p-40484_33	TCGCTTTACCAATGTGACC	up	inf	inf	0.0279548	0	8.28062	0	0	0	0	6.97748	12.9102	3.24935	9.98544	0	0	0	0	7	12	5	9	middle
79	ssc-mir-4332-p5_1ss13CT_1	CCGGGGGTGGGGTCGGCG	down	0.154666	-2.69278	0.0284981	85.2444	13.1844	65.5546	44.792	125.626	105.005	18.4405	14.524	8.12338	11.6497	66.5	47	112	81.5	18.5	13.5	12.5	10.5	middle
80	ssc-mir-4332-p5_1ss13CT_2	CCGGGGGTGGGGTCGGCGG	down	0.154666	-2.69278	0.0284981	85.2444	13.1844	65.5546	44.792	125.626	105.005	18.4405	14.524	8.12338	11.6497	66.5	47	112	81.5	18.5	13.5	12.5	10.5	middle
81	pal-miR-9995-3p	ATCTCGGTGGAACCTCCA	down	0.480283	-1.05804	0.029164	234.872	112.805	293.764	263.034	246.764	135.927	156.495	74.7715	134.523	85.431	298	276	220	105.5	157	69.5	207	77	middle
82	PC-3p-19336_101	CCTGAGTTGTAGGTGGTGT	up	2.71971	1.44345	0.0294016	6.07877	16.5325	7.88627	8.5772	7.8516	0	12.9582	11.8343	24.6951	16.6424	8	9	7	0	13	11	38	15	middle
83	hsa-miR-494-3p_R+1	TGAAACATACACGGGAAACCTCT	up	inf	inf	0.029676	0	66.6148	0	0	0	0	51.8327	96.8264	92.2816	25.5184	0	0	0	0	52	90	142	23	middle
84	hsa-miR-1266-5p	CCTCAGGGCTGTAGAACAGGGCT	down	0.506888	-0.980262	0.0310923	98.3073	49.8307	135.052	100.067	71.786	86.3234	56.8166	45.1857	58.4883	38.8323	137	105	64	67	57	42	90	35	middle
85	hsa-miR-320d_R-1	AAAAGCTGGGTTGAGAGG	up	1.28748	0.364552	0.0311452	119.064	153.293	112.602	130.428	138.712	94.514	137.77	152.13	163.319	159.952	114.226	136.857	123.667	73.3571	138.214	141.405	251.31	144.167	middle
86	hsa-miR-1229-3p_R-1	CTCTCACCACTGCCCTCCCACA	down	0.565254	-0.823028	0.0314394	89.1085	50.3689	109.422	66.7115	78.516	101.784	36.881	31.1996	62.3876	71.0076	111	70	70	79	37	29	96	64	middle
87	PC-3p-5723_472	AGGGACTCGAACCAGTAAGA	up	2.8247	1.4981	0.0328892	36.954	104.384	33.5166	47.6511	37.0147	29.6334	80.7394	142.012	129.324	65.4601	34	50	33	23	81	132	199	59	middle
88	hsa-miR-675-3p_R+2	CTGTATGCCCTCACCGCTCAGC	down	0.39064	-1.35609	0.0335044	17423.7	6806.39	15598.1	13009.7	14795.8	26291.3	6734.27	6801.52	4648.52	9041.26	15823	13651	13191	20406	6756	6322	7153	8149	high
89	bta-miR-11987_L-2R-1_1ss8TA	AGGAAACTCTGGTGGAGG	up	2.73715	1.45267	0.0350019	7.75026	21.2136	6.90049	7.62418	6.16911	10.3073	24.4212	10.7585	28.5943	21.0804	7	8	5.5	8	24.5	10	44	19	middle
90	hsa-miR-495-3p	AAACAAACATGGTGCACTTCTT	up	inf	inf	0.0354545	0	36.6121	0	0	0	0	10.9646	36.5789	38.9922	59.9126	0	0	0	0	11	34	60	54	middle
91	hsa-miR-30c-5p_R+1	TGTAAACATCCTACACTCTCAGCT	down	0.815396	-0.294428	0.0365587	164215	133900	168287	187863	146910	153802	130210	150794	131563	123035	170714	197124	130976	119374	130630	140163	202444	110893	high
92	hsa-miR-320e_L+1R-1_1ss18GA	AAAAGCTGGGTTGAGAAA	up	2.27954	1.18874	0.0366206	21.6848	49.4314	31.2986	25.7316	16.8248	12.8841	64.7909	35.503	63.0374	34.3943	31.75	27	15	10	65	33	97	31	middle
93	hsa-miR-758-3p_R-1	TTTGTGACCTGGTCCACTAAC	up	inf	inf	0.0371309	0	15.1552	0	0	0	0	25.9164	12.9102	16.2468	5.54747	0	0	0	0	26	12	25	5	middle
94	hsa-miR-182-5p	TTTGGCAATGGTAGAACTCACACT	up	1.54245	0.625226	0.0401179	4297.22	6628.26	4464.61	5850.6	4055.91	2817.75	5683.66	7266.28	8111.03	5452.05	4529	6139	3616	2187	5702	6754	12481	4914	high
95	hsa-miR-181a-5p	AACATTCAACGCTGTCGGTGAGT	up	1.71384	0.777229	0.0417348	20290.7	34775	17149.7	18705	20170.2	25138.2	27250.6	33122.2	30927	47800.3	17397	19627	17982.5	19511	27338.5	30787	47589.5	43083	high
96	hsa-miR-152-5p	AGGTTCTGTGATACACTCCGACT	up	3.79525	1.92419	0.0424677	4.35942	16.5451	11.8294	0	5.60828	0	6.97748	24.7445	15.5969	18.8614	12	0	5	0	7	23	24	17	middle
97	PC-5p-24716_72	ACTCAAGTTCTGGTCTCCA	up	2.01209	1.00869	0.0456016	6.00464	12.0819	5.9147	4.76511	5.60828	7.73046	9.96783	16.1377	7.79845	14.4234	6	5	5	6	10	15	12	13	middle
98	bta-miR-1246_L+1R+2	AAATGGATTTTTGGAGCAGGGA	up	1.5898	0.668847	0.0462124	214.819	341.519	194.692	251.121	260.785	152.677	336.913	228.08	390.572	410.513	197.5	263.5	232.5	118.5	338	212	601	370	middle
99	hsa-miR-181b-5p_R+1	AACATTCATTGCTGTCGGTGGGTT	up	1.67667	0.745598	0.0468337	9187.33	15404.1	7954.78	9553.09	9958.44	9282.99	11781.5	13229.5	15936.5	20668.9	8069.5	10024	8878.33	7205	11819.5	12296.8	24522.5	18629.2	high
100	hsa-miR-411-3p_R-1	TATGTAACACGGTCCACTAAC	up	inf	inf	0.0482013	0	17.6756	0	0	0	0	9.96783	19.3653	32.4935	8.87595	0	0	0	0	10	18	50	8	middle
101	hsa-miR-25-5p_R+2	AGGCGGAGACTTGGGCAATTGCT	up	1.15031	0.202022	0.0493203	1476.23	1698.12	1547.68	1606.8	1362.81	1387.62	1781.25	1823.56	1664.32	1523.33	1570	1686	1215	1077	1787	1695	2561	1373	middle
102	hsa-miR-24-3p	TGGCTCAGTTCAGCAGGAACAG	up	1.43984	0.525907	0.0495607	20891.3	30080.1	16679	21219	24454.9	21212.4	24579.2	29491.2	27504.5	38745.7	16919.5	22265	21802.5	16464	24658.5	27412	42323	34922	high
103	PC-3p-14255_149	TCTGTGCTTCACCCCTACCCAGT	up	1.56625	0.647316	0.0498542	14.0245	21.9659	9.85784	18.1074	10.0949	18.0377	25.9164	23.6687	22.7455	15.5329	10	19	9	14	26	22	35	14	middle
