# Supplementary material for: Comprehensive analysis of TGF-β-induced mRNAs and ncRNAs in hepatocellular carcinoma
Source: Aging (Albany NY). 2020 Oct 4;12(19):19399–420. doi: 10.18632/aging.103826 (PMC7732333; doi:10.18632/aging.103826)
Supplement: Supplementary Table 4 [file aging-12-103826-s005..xlsx]

## Sheet: Sheet1
Supplementary Table 4. Differentially expressed circRNAs upon treatment with TGF-β.
Accession	TGFB_1_srpbm	TGFB_2_srpbm	TGFB_3_srpbm	TGFB_4_srpbm	DMSO_1_srpbm	DMSO_2_srpbm	DMSO_3_srpbm	DMSO_4_srpbm	TGFB_1_count	TGFB_2_count	TGFB_3_count	TGFB_4_count	DMSO_1_count	DMSO_2_count	DMSO_3_count	DMSO_4_count	log2FoldChange	regulation	pvalue	qvalue	significant	chr	start	end	strand	exon Count	circType	isoformName	geneName	flankIntron	gene Discription	GO	KEGG	EC
circRNA2560	0	0	0	0	796.39	918.2	754.438	0	0	0	0	0	48	62	52	0	-inf	down	8.12716e-06	0.0351581	yes	chr8	127218810	127254192	-	1	intergenic	intergenic_circRNA	intergenic_circRNA	chr8:127218809-127254192	NA	NA	NA	NA
circRNA8331	119.903	171.171	105.732	155.374	0	0	0	46.5843	8	8	8	13	0	0	0	3	3.56722	up	0.00025521	0.55202	yes	chr3	143985544	143989837	+	2	circRNA	ENST00000495414	ENSG00000181744	chr3:143973562-143985543	divergent protein kinase domain 2A [Source:HGNC Symbol;Acc:HGNC:28490]	GO:0000139(Golgi membrane);GO:0005576(extracellular region);GO:0005615(extracellular space);GO:0005794(Golgi apparatus);GO:0014066(regulation of phosphatidylinositol 3-kinase signaling);GO:0030126(COPI vesicle coat);GO:0030137(COPI-coated vesicle);GO:0031410(cytoplasmic vesicle);GO:0034392(negative regulation of smooth muscle cell apoptotic process);GO:0060038(cardiac muscle cell proliferation)	NA	NA
circRNA9874	134.891	42.7928	52.8659	23.9037	0	0	0	0	9	2	4	2	0	0	0	0	inf	up	0.00199801	1	yes	chr17	75148529	75249008	-	1	intergenic	intergenic_circRNA	intergenic_circRNA	chr17:75148528-75249008	NA	NA	NA	NA
circRNA2634	0	106.982	0	23.9037	165.915	118.477	188.61	139.753	0	5	0	2	10	8	13	9	-2.227	down	0.00283449	1	yes	chr15	25405462	25411971	-	5	circRNA	ENST00000629252	ENSG00000114062	chr15:25375763-25405461|chr15:25411971-25438489	ubiquitin protein ligase E3A [Source:HGNC Symbol;Acc:HGNC:12496]	GO:0000209(protein polyubiquitination);GO:0000502(proteasome complex);GO:0001541(ovarian follicle development);GO:0003713(transcription coactivator activity);GO:0004842(ubiquitin-protein transferase activity);GO:0005515(protein binding);GO:0005634(nucleus);GO:0005737(cytoplasm);GO:0005829(cytosol);GO:0006508(proteolysis);GO:0006511(ubiquitin-dependent protein catabolic process);GO:0007420(brain d…	04120(Ubiquitin mediated proteolysis);05165(Human papillomavirus infection);05203(Viral carcinogenesis)	EC:2.3.2.26
hsa_circ_0005480	59.9514	171.171	132.165	35.8556	16.5915	14.8097	14.5084	0	4	8	10	3	1	1	1	0	3.12004	up	0.0029594	1	yes	chr4	150102478	150102812	+	1	circRNA	ENST00000296550	DCLK2	2	doublecortin like kinase 2 [Source:HGNC Symbol;Acc:HGNC:19002]	GO:0000166(nucleotide binding);GO:0000226(microtubule cytoskeleton organization);GO:0004672(protein kinase activity);GO:0004674(protein serine/threonine kinase activity);GO:0005524(ATP binding);GO:0005737(cytoplasm);GO:0005856(cytoskeleton);GO:0005874(microtubule);GO:0006468(protein phosphorylation);GO:0016301(kinase activity);GO:0016310(phosphorylation);GO:0016740(transferase activity);GO:001810…	NA	EC:2.7.11.1
circRNA9941	59.9514	64.1892	26.4329	35.8556	0	0	0	0	4	3	2	3	0	0	0	0	inf	up	0.00301578	1	yes	chr6	110746127	110773937	-	2	circRNA	ENST00000457688	ENSG00000155111	chr6:110670541-110746126|chr6:110773937-110815009	cyclin dependent kinase 19 [Source:HGNC Symbol;Acc:HGNC:19338]	GO:0000166(nucleotide binding);GO:0004672(protein kinase activity);GO:0004674(protein serine/threonine kinase activity);GO:0004693(cyclin-dependent protein serine/threonine kinase activity);GO:0005524(ATP binding);GO:0005634(nucleus);GO:0005829(cytosol);GO:0006468(protein phosphorylation);GO:0016301(kinase activity);GO:0016310(phosphorylation);GO:0016592(mediator complex);GO:0016740(transferase a…	NA	EC:2.7.11.22
circRNA3331	179.854	85.5856	52.8659	71.7112	0	14.8097	14.5084	15.5281	12	4	4	6	0	1	1	1	3.12048	up	0.00331133	1	yes	chr14	32090502	32117287	+	2	circRNA	ENST00000556611	ARHGAP5	2,3	Rho GTPase activating protein 5 [Source:HGNC Symbol;Acc:HGNC:675]	GO:0003924(GTPase activity);GO:0005096(GTPase activator activity);GO:0005515(protein binding);GO:0005525(GTP binding);GO:0005737(cytoplasm);GO:0005783(endoplasmic reticulum);GO:0005829(cytosol);GO:0005886(plasma membrane);GO:0007155(cell adhesion);GO:0007165(signal transduction);GO:0007266(Rho protein signal transduction);GO:0016020(membrane);GO:0030879(mammary gland development);GO:0042169(SH2 d…	04510(Focal adhesion);04670(Leukocyte transendothelial migration)	NA
hsa_circ_0008250	14.9878	21.3964	0	0	49.7744	74.0484	58.0337	77.6405	1	1	0	0	3	5	4	5	-2.83433	down	0.00359786	1	yes	chr12	28305649	28391411	+	5	circRNA	ENST00000535520	CCDC91	6,7,8,9,10	coiled-coil domain containing 91 [Source:HGNC Symbol;Acc:HGNC:24855]	GO:0005654(nucleoplasm);GO:0005794(Golgi apparatus);GO:0005802(trans-Golgi network);GO:0005829(cytosol);GO:0015031(protein transport);GO:0016020(membrane);GO:0042802(identical protein binding);GO:0048193(Golgi vesicle transport);GO:0090160(Golgi to lysosome transport)	NA	NA
circRNA2358	0	0	0	0	99.5488	103.668	43.5253	0	0	0	0	0	6	7	3	0	-inf	down	0.00369642	1	yes	chr15	85113874	85115487	+	2	circRNA	ENST00000394553	ENSG00000073417	chr15:85113447-85113873|chr15:85115487-85115984	phosphodiesterase 8A [Source:HGNC Symbol;Acc:HGNC:8793]	GO:0001934(positive regulation of protein phosphorylation);GO:0004114(3',5'-cyclic-nucleotide phosphodiesterase activity);GO:0004115(3',5'-cyclic-AMP phosphodiesterase activity);GO:0005829(cytosol);GO:0006198(cAMP catabolic process);GO:0006355(regulation of transcription, DNA-templated);GO:0007165(signal transduction);GO:0007186(G protein-coupled receptor signaling pathway);GO:0008081(phosphoric …	00230(Purine metabolism);04927(Cortisol synthesis and secretion);04934(Cushing syndrome);05032(Morphine addiction)	NA
ciRNA592	89.927	42.7928	26.4329	23.9037	0	0	0	0	6	2	2	2	0	0	0	0	inf	up	0.00569069	1	yes	chr10	103519532	103520296	-	1	ciRNA	ENST00000369780	ENSG00000107954	chr10:103519531-103520296	neuralized E3 ubiquitin protein ligase 1 [Source:HGNC Symbol;Acc:HGNC:7761]	GO:0004842(ubiquitin-protein transferase activity);GO:0005737(cytoplasm);GO:0005886(plasma membrane);GO:0006417(regulation of translation);GO:0006513(protein monoubiquitination);GO:0007219(Notch signaling pathway);GO:0007288(sperm axoneme assembly);GO:0007399(nervous system development);GO:0007420(brain development);GO:0007519(skeletal muscle tissue development);GO:0007595(lactation);GO:0008285(n…	NA	EC:2.3.2.27
hsa_circ_0006123	29.9757	64.1892	13.2165	83.6631	0	0	0	0	2	3	1	7	0	0	0	0	inf	up	0.00682935	1	yes	chr1	210919640	210920069	-	1	circRNA	ENST00000367007	KCNH1	7	potassium voltage-gated channel subfamily H member 1 [Source:HGNC Symbol;Acc:HGNC:6250]	GO:0001964(startle response);GO:0005216(ion channel activity);GO:0005244(voltage-gated ion channel activity);GO:0005249(voltage-gated potassium channel activity);GO:0005251(delayed rectifier potassium channel activity);GO:0005267(potassium channel activity);GO:0005515(protein binding);GO:0005516(calmodulin binding);GO:0005634(nucleus);GO:0005637(nuclear inner membrane);GO:0005768(endosome);GO:000…	NA	NA
hsa_circ_0019170	119.903	42.7928	0	59.7593	0	0	0	0	8	2	0	5	0	0	0	0	inf	up	0.0073357	1	yes	chr10	92893349	92899644	+	4	circRNA	ENST00000371552	EXOC6	2,3,4,5	exocyst complex component 6 [Source:HGNC Symbol;Acc:HGNC:23196]	GO:0000145(exocyst);GO:0005515(protein binding);GO:0005737(cytoplasm);GO:0005829(cytosol);GO:0005886(plasma membrane);GO:0006887(exocytosis);GO:0006893(Golgi to plasma membrane transport);GO:0006904(vesicle docking involved in exocytosis);GO:0015031(protein transport);GO:0016020(membrane);GO:0030426(growth cone);GO:0042995(cell projection);GO:0048471(perinuclear region of cytoplasm);GO:0090543(Fl…	NA	NA
hsa_circ_0004420	134.891	128.378	118.948	95.6149	16.5915	29.6194	58.0337	0	9	6	9	8	1	2	4	0	2.19653	up	0.00740939	1	yes	chr2	84870225	84870785	-	1	circRNA	ENST00000335459	TRABD2A	2	TraB domain containing 2A [Source:HGNC Symbol;Acc:HGNC:27013]	GO:0004175(endopeptidase activity);GO:0004222(metalloendopeptidase activity);GO:0005886(plasma membrane);GO:0005887(integral component of plasma membrane);GO:0006508(proteolysis);GO:0008233(peptidase activity);GO:0008237(metallopeptidase activity);GO:0016020(membrane);GO:0016021(integral component of membrane);GO:0016055(Wnt signaling pathway);GO:0016787(hydrolase activity);GO:0017147(Wnt-protein…	NA	NA
circRNA2450	0	0	0	0	33.1829	0	43.5253	155.281	0	0	0	0	2	0	3	10	-inf	down	0.00756325	1	yes	chr1	155438328	155459898	-	2	circRNA	ENST00000392403	ENSG00000116539	chr1:155415923-155438327|chr1:155459898-155477886	ASH1 like histone lysine methyltransferase [Source:HGNC Symbol;Acc:HGNC:19088]	GO:0000981(DNA-binding transcription factor activity, RNA polymerase II-specific);GO:0001501(skeletal system development);GO:0002674(negative regulation of acute inflammatory response);GO:0003677(DNA binding);GO:0003682(chromatin binding);GO:0005515(protein binding);GO:0005634(nucleus);GO:0005654(nucleoplasm);GO:0005694(chromosome);GO:0005794(Golgi apparatus);GO:0005923(bicellular tight junction)…	00310(Lysine degradation)	EC:2.1.1.43
circRNA984	0	64.1892	26.4329	59.7593	199.098	148.097	203.118	46.5843	0	3	2	5	12	10	14	3	-1.98885	down	0.0119319	1	yes	chr18	58578814	58580548	-	1	circRNA	ENST00000361673	ALPK2	4	alpha kinase 2 [Source:HGNC Symbol;Acc:HGNC:20565]	GO:0004674(protein serine/threonine kinase activity);GO:0005524(ATP binding);GO:0006468(protein phosphorylation);GO:0016301(kinase activity);GO:0016310(phosphorylation);GO:0016740(transferase activity)	NA	NA
hsa_circ_0002153	14.9878	0	52.8659	11.9519	132.732	59.2387	72.5421	93.1686	1	0	4	1	8	4	5	6	-2.16411	down	0.012347	1	yes	chrX	107840670	107854704	+	2	circRNA	ENST00000262843	MID2	2,3	midline 2 [Source:HGNC Symbol;Acc:HGNC:7096]	GO:0005515(protein binding);GO:0005622(intracellular);GO:0005737(cytoplasm);GO:0005856(cytoskeleton);GO:0005874(microtubule);GO:0008017(microtubule binding);GO:0008270(zinc ion binding);GO:0010508(positive regulation of autophagy);GO:0016567(protein ubiquitination);GO:0016740(transferase activity);GO:0032897(negative regulation of viral transcription);GO:0035372(protein localization to microtubul…	NA	EC:2.3.2.27
circRNA2284	29.9757	21.3964	52.8659	23.9037	116.14	103.668	174.101	46.5843	2	1	4	2	7	7	12	3	-1.78138	down	0.0140774	1	yes	chr8	127218810	127223666	-	2	circRNA	ENST00000641321	CASC19	2,1	cancer susceptibility 19 [Source:HGNC Symbol;Acc:HGNC:49476]	NA	NA	NA
circRNA9924	29.9757	64.1892	0	83.6631	0	0	0	0	2	3	0	7	0	0	0	0	inf	up	0.0141707	1	yes	chr1	210919641	210920069	-	1	circRNA	ENST00000639602	ENSG00000284299	chr1:210861194-210919640|chr1:210920069-211018864	novel protein	GO:0005216(ion channel activity);GO:0005249(voltage-gated potassium channel activity);GO:0005887(integral component of plasma membrane);GO:0006811(ion transport);GO:0006813(potassium ion transport);GO:0016020(membrane);GO:0016021(integral component of membrane);GO:0055085(transmembrane transport);GO:0071805(potassium ion transmembrane transport)	NA	NA
hsa_circ_0003302	0	0	0	0	99.5488	29.6194	0	46.5843	0	0	0	0	6	2	0	3	-inf	down	0.0142827	1	yes	chr11	121045674	121060085	+	6	circRNA	ENST00000529397	TBCEL	2,3,4,5,6,7	tubulin folding cofactor E like [Source:HGNC Symbol;Acc:HGNC:28115]	GO:0005515(protein binding);GO:0005737(cytoplasm);GO:0005856(cytoskeleton)	NA	NA
hsa_circ_0042437	44.9635	42.7928	39.6494	59.7593	16.5915	0	0	0	3	2	3	5	1	0	0	0	3.4958	up	0.0153877	1	yes	chr17	20253505	20260294	+	3	circRNA	ENST00000395527	SPECC1	10,11,12	sperm antigen with calponin homology and coiled-coil domains 1 [Source:HGNC Symbol;Acc:HGNC:30615]	GO:0005515(protein binding);GO:0005634(nucleus);GO:0005815(microtubule organizing center);GO:0016020(membrane);GO:0030036(actin cytoskeleton organization);GO:0031941(filamentous actin)	NA	NA
hsa_circ_0005035	149.878	278.153	171.814	143.422	49.7744	103.668	0	0	10	13	13	12	3	7	0	0	2.27619	up	0.015685	1	yes	chr15	98707562	98708107	+	1	circRNA	ENST00000649865	IGF1R	2	insulin like growth factor 1 receptor [Source:HGNC Symbol;Acc:HGNC:5465]	GO:0000166(nucleotide binding);GO:0004672(protein kinase activity);GO:0004713(protein tyrosine kinase activity);GO:0004714(transmembrane receptor protein tyrosine kinase activity);GO:0005009(insulin-activated receptor activity);GO:0005010(insulin-like growth factor-activated receptor activity);GO:0005158(insulin receptor binding);GO:0005515(protein binding);GO:0005520(insulin-like growth factor b…	01521(EGFR tyrosine kinase inhibitor resistance);01522(Endocrine resistance);04010(MAPK signaling pathway);04014(Ras signaling pathway);04015(Rap1 signaling pathway);04066(HIF-1 signaling pathway);04068(FoxO signaling pathway);04114(Oocyte meiosis);04140(Autophagy - animal);04144(Endocytosis);04150(mTOR signaling pathway);04151(PI3K-Akt signaling pathway);04152(AMPK signaling pathway);04211(Longe…	EC:2.7.10.1
hsa_circ_0107595	14.9878	0	0	11.9519	82.9573	29.6194	72.5421	31.0562	1	0	0	1	5	2	5	2	-3.00439	down	0.018711	1	yes	chr17	69273959	69284072	-	3	circRNA	ENST00000392676	ABCA5	20,19,18	ATP binding cassette subfamily A member 5 [Source:HGNC Symbol;Acc:HGNC:35]	GO:0000139(Golgi membrane);GO:0000166(nucleotide binding);GO:0005319(lipid transporter activity);GO:0005524(ATP binding);GO:0005764(lysosome);GO:0005765(lysosomal membrane);GO:0005768(endosome);GO:0005770(late endosome);GO:0005794(Golgi apparatus);GO:0006869(lipid transport);GO:0010745(negative regulation of macrophage derived foam cell differentiation);GO:0016020(membrane);GO:0016021(integral co…	02010(ABC transporters)	NA
circRNA73	0	0	39.6494	23.9037	66.3659	103.668	72.5421	46.5843	0	0	3	2	4	7	5	3	-2.18583	down	0.0198876	1	yes	chr13	60439688	60467379	+	4	circRNA	ENST00000196169	TDRD3	2,3,4,5	tudor domain containing 3 [Source:HGNC Symbol;Acc:HGNC:20612]	GO:0003682(chromatin binding);GO:0003713(transcription coactivator activity);GO:0003723(RNA binding);GO:0005515(protein binding);GO:0005634(nucleus);GO:0005654(nucleoplasm);GO:0005737(cytoplasm);GO:0005794(Golgi apparatus);GO:0005829(cytosol);GO:0006325(chromatin organization);GO:0035064(methylated histone binding);GO:0035145(exon-exon junction complex);GO:1903508(positive regulation of nucleic a…	NA	NA
circRNA9897	89.927	0	145.381	0	0	0	0	0	6	0	11	0	0	0	0	0	inf	up	0.020167	1	yes	chr5	65988636	65994864	+	3	circRNA	ENST00000506030	ENSG00000112851	chr5:65926806-65988635|chr5:65994864-66012049	erbb2 interacting protein [Source:HGNC Symbol;Acc:HGNC:15842]	GO:0005102(signaling receptor binding);GO:0005176(ErbB-2 class receptor binding);GO:0005200(structural constituent of cytoskeleton);GO:0005515(protein binding);GO:0005604(basement membrane);GO:0005634(nucleus);GO:0005737(cytoplasm);GO:0005886(plasma membrane);GO:0006605(protein targeting);GO:0007155(cell adhesion);GO:0007165(signal transduction);GO:0007173(epidermal growth factor receptor signali…	04621(NOD-like receptor signaling pathway)	NA
circRNA9903	104.915	171.171	0	0	0	0	0	0	7	8	0	0	0	0	0	0	inf	up	0.0229981	1	yes	chr2	58221943	58232112	-	4	circRNA	ENST00000481670	ENSG00000115392	chr2:58213706-58221942|chr2:58232112-58241218	FA complementation group L [Source:HGNC Symbol;Acc:HGNC:20748]	GO:0004842(ubiquitin-protein transferase activity);GO:0005515(protein binding);GO:0005634(nucleus);GO:0005635(nuclear envelope);GO:0005654(nucleoplasm);GO:0005737(cytoplasm);GO:0006281(DNA repair);GO:0006513(protein monoubiquitination);GO:0006974(cellular response to DNA damage stimulus);GO:0007276(gamete generation);GO:0016567(protein ubiquitination);GO:0016604(nuclear body);GO:0016740(transfera…	03460(Fanconi anemia pathway);04120(Ubiquitin mediated proteolysis)	EC:2.3.2.27
hsa_circ_0006157	44.9635	85.5856	105.732	35.8556	33.1829	14.8097	0	0	3	4	8	3	2	1	0	0	2.50345	up	0.0234427	1	yes	chr5	38990949	39003622	-	4	circRNA	ENST00000357387	RICTOR	7,6,5,4	RPTOR independent companion of MTOR complex 2 [Source:HGNC Symbol;Acc:HGNC:28611]	GO:0001932(regulation of protein phosphorylation);GO:0001938(positive regulation of endothelial cell proliferation);GO:0005515(protein binding);GO:0005829(cytosol);GO:0007275(multicellular organism development);GO:0008047(enzyme activator activity);GO:0009792(embryo development ending in birth or egg hatching);GO:0010468(regulation of gene expression);GO:0016032(viral process);GO:0018105(peptidyl…	04150(mTOR signaling pathway)	NA
circRNA5113	14.9878	64.1892	52.8659	47.8075	0	0	14.5084	0	1	3	4	4	0	0	1	0	3.63183	up	0.0251507	1	yes	chr13	113190872	113200516	-	6	circRNA	ENST00000622406	PCID2	7,6,5,4,3,2	PCI domain containing 2 [Source:HGNC Symbol;Acc:HGNC:25653]	GO:0000973(posttranscriptional tethering of RNA polymerase II gene DNA at nuclear periphery);GO:0003690(double-stranded DNA binding);GO:0003723(RNA binding);GO:0005515(protein binding);GO:0005575(cellular_component);GO:0005634(nucleus);GO:0005737(cytoplasm);GO:0006368(transcription elongation from RNA polymerase II promoter);GO:0016973(poly(A)+ mRNA export from nucleus);GO:0035327(transcriptional…	NA	NA
circRNA9849	29.9757	85.5856	0	47.8075	0	0	0	0	2	4	0	4	0	0	0	0	inf	up	0.0259534	1	yes	chr12	122546177	122547969	+	4	circRNA	ENST00000333479	ENSG00000184445	chr12:122544269-122546176|chr12:122547969-122549766	kinetochore associated 1 [Source:HGNC Symbol;Acc:HGNC:17255]	GO:0000775(chromosome, centromeric region);GO:0000776(kinetochore);GO:0000777(condensed chromosome kinetochore);GO:0000922(spindle pole);GO:0005515(protein binding);GO:0005634(nucleus);GO:0005694(chromosome);GO:0005737(cytoplasm);GO:0005819(spindle);GO:0005828(kinetochore microtubule);GO:0005829(cytosol);GO:0005856(cytoskeleton);GO:0005886(plasma membrane);GO:0007049(cell cycle);GO:0007093(mitoti…	NA	NA
circRNA1212	0	0	13.2165	11.9519	16.5915	59.2387	43.5253	77.6405	0	0	1	1	1	4	3	5	-2.96848	down	0.0261086	1	yes	chr7	133817325	133895735	+	2	circRNA	ENST00000253861	EXOC4	11,12	exocyst complex component 4 [Source:HGNC Symbol;Acc:HGNC:30389]	GO:0000145(exocyst);GO:0005515(protein binding);GO:0005737(cytoplasm);GO:0005829(cytosol);GO:0005886(plasma membrane);GO:0005902(microvillus);GO:0006612(protein targeting to membrane);GO:0006887(exocytosis);GO:0006893(Golgi to plasma membrane transport);GO:0006904(vesicle docking involved in exocytosis);GO:0007268(chemical synaptic transmission);GO:0015031(protein transport);GO:0016020(membrane);…	NA	NA
circRNA10042	29.9757	106.982	39.6494	0	0	0	0	0	2	5	3	0	0	0	0	0	inf	up	0.0287461	1	yes	chr1	21050867	21111383	-	3	circRNA	ENST00000356916	ENSG00000075151	chr1:21002808-21050866|chr1:21111383-21167961	eukaryotic translation initiation factor 4 gamma 3 [Source:HGNC Symbol;Acc:HGNC:3298]	GO:0000339(RNA cap binding);GO:0003723(RNA binding);GO:0003729(mRNA binding);GO:0003743(translation initiation factor activity);GO:0005515(protein binding);GO:0005829(cytosol);GO:0006412(translation);GO:0006413(translational initiation);GO:0006417(regulation of translation);GO:0006446(regulation of translational initiation);GO:0008135(translation factor activity, RNA binding);GO:0016281(eukaryoti…	03013(RNA transport);05416(Viral myocarditis)	NA
hsa_circ_0001639	44.9635	42.7928	13.2165	23.9037	0	0	0	0	3	2	1	2	0	0	0	0	inf	up	0.0290279	1	yes	chr6	116698704	116705160	+	3	circRNA	ENST00000368564	KPNA5	5,6,7	karyopherin subunit alpha 5 [Source:HGNC Symbol;Acc:HGNC:6398]	GO:0005515(protein binding);GO:0005634(nucleus);GO:0005643(nuclear pore);GO:0005654(nucleoplasm);GO:0005737(cytoplasm);GO:0005829(cytosol);GO:0006606(protein import into nucleus);GO:0006607(NLS-bearing protein import into nucleus);GO:0008139(nuclear localization sequence binding);GO:0008565(protein transporter activity);GO:0015031(protein transport);GO:0016032(viral process);GO:0019054(modulation…	NA	NA
circRNA2527	0	0	26.4329	23.9037	49.7744	59.2387	58.0337	46.5843	0	0	2	2	3	4	4	3	-2.08544	down	0.0311338	1	yes	chr1	1482138	1518990	+	1	intergenic	intergenic_circRNA	intergenic_circRNA	chr1:1482137-1518990	NA	NA	NA	NA
circRNA13401	0	0	39.6494	143.422	0	0	0	0	0	0	3	12	0	0	0	0	inf	up	0.0318934	1	yes	chr3	71015550	71053773	-	5	circRNA	ENST00000650123	ENSG00000285708	chr3:71001059-71015549|chr3:71053773-71112536	novel protein	GO:0003677(DNA binding);GO:0003700(DNA-binding transcription factor activity);GO:0003723(RNA binding);GO:0003743(translation initiation factor activity);GO:0005634(nucleus);GO:0005654(nucleoplasm);GO:0005737(cytoplasm);GO:0006355(regulation of transcription, DNA-templated);GO:0006413(translational initiation);GO:0043565(sequence-specific DNA binding)	NA	NA
hsa_circ_0005332	29.9757	21.3964	13.2165	0	33.1829	103.668	43.5253	77.6405	2	1	1	0	2	7	3	5	-1.99811	down	0.0329055	1	yes	chr3	114350274	114351878	-	1	circRNA	ENST00000357258	ZBTB20	9	zinc finger and BTB domain containing 20 [Source:HGNC Symbol;Acc:HGNC:13503]	GO:0000122(negative regulation of transcription by RNA polymerase II);GO:0000981(DNA-binding transcription factor activity, RNA polymerase II-specific);GO:0001227(DNA-binding transcription repressor activity, RNA polymerase II-specific);GO:0003676(nucleic acid binding);GO:0003677(DNA binding);GO:0005515(protein binding);GO:0005634(nucleus);GO:0005654(nucleoplasm);GO:0005737(cytoplasm);GO:0010629(…	NA	NA
circRNA2344	0	0	0	0	49.7744	148.097	0	0	0	0	0	0	3	10	0	0	-inf	down	0.0336355	1	yes	chr4	51863438	51877854	+	4	circRNA	ENST00000451288	ENSG00000109184	chr4:51843742-51863437|chr4:51877854-51886568	defective in cullin neddylation 1 domain containing 4 [Source:HGNC Symbol;Acc:HGNC:28998]	GO:0000151(ubiquitin ligase complex);GO:0003674(molecular_function);GO:0005515(protein binding);GO:0005634(nucleus);GO:0008150(biological_process);GO:0031624(ubiquitin conjugating enzyme binding);GO:0032182(ubiquitin-like protein binding);GO:0045116(protein neddylation);GO:0051443(positive regulation of ubiquitin-protein transferase activity);GO:0097602(cullin family protein binding)	NA	NA
hsa_circ_0006324	0	0	0	0	66.3659	14.8097	0	62.1124	0	0	0	0	4	1	0	4	-inf	down	0.0346159	1	yes	chr1	197642711	197658369	-	5	circRNA	ENST00000620048	DENND1B	10,9,8,7,6	DENN domain containing 1B [Source:HGNC Symbol;Acc:HGNC:28404]	GO:0005085(guanyl-nucleotide exchange factor activity);GO:0005737(cytoplasm);GO:0005829(cytosol);GO:0006897(endocytosis);GO:0015031(protein transport);GO:0016607(nuclear speck);GO:0017112(Rab guanyl-nucleotide exchange factor activity);GO:0017137(Rab GTPase binding);GO:0030136(clathrin-coated vesicle);GO:0031410(cytoplasmic vesicle);GO:0032456(endocytic recycling);GO:0035745(T-helper 2 cell cytok…	NA	NA
ciRNA105	0	0	0	0	33.1829	59.2387	43.5253	0	0	0	0	0	2	4	3	0	-inf	down	0.0346603	1	yes	chr11	309018	314356	+	1	ciRNA	ENST00000533141	ENSG00000185201	chr11:309017-314356	interferon induced transmembrane protein 2 [Source:HGNC Symbol;Acc:HGNC:5413]	GO:0002376(immune system process);GO:0005886(plasma membrane);GO:0006955(immune response);GO:0009615(response to virus);GO:0016020(membrane);GO:0016021(integral component of membrane);GO:0032991(protein-containing complex);GO:0034341(response to interferon-gamma);GO:0035455(response to interferon-alpha);GO:0035456(response to interferon-beta);GO:0045071(negative regulation of viral genome replica…	NA	NA
hsa_circ_0000606	0	0	0	0	49.7744	59.2387	0	31.0562	0	0	0	0	3	4	0	2	-inf	down	0.034829	1	yes	chr15	60442416	60445791	-	1	ciRNA	ENST00000261520	ENSG00000128915	chr15:60442415-60445791	interactor of little elongation complex ELL subunit 2 [Source:HGNC Symbol;Acc:HGNC:29885]	GO:0005515(protein binding);GO:0005634(nucleus);GO:0005654(nucleoplasm);GO:0005829(cytosol);GO:0008023(transcription elongation factor complex);GO:0015030(Cajal body);GO:0016604(nuclear body);GO:0035327(transcriptionally active chromatin);GO:0035363(histone locus body);GO:0042795(snRNA transcription by RNA polymerase II);GO:0042796(snRNA transcription by RNA polymerase III);GO:0045945(positive re…	NA	NA
hsa_circ_0005838	29.9757	21.3964	26.4329	23.9037	0	0	0	0	2	1	2	2	0	0	0	0	inf	up	0.0348417	1	yes	chr16	346148	347106	-	1	circRNA	ENST00000262320	AXIN1	2	axin 1 [Source:HGNC Symbol;Acc:HGNC:903]	GO:0001934(positive regulation of protein phosphorylation);GO:0005515(protein binding);GO:0005634(nucleus);GO:0005737(cytoplasm);GO:0005829(cytosol);GO:0005886(plasma membrane);GO:0006915(apoptotic process);GO:0007165(signal transduction);GO:0007275(multicellular organism development);GO:0008013(beta-catenin binding);GO:0010800(positive regulation of peptidyl-threonine phosphorylation);GO:0016020…	04310(Wnt signaling pathway);04390(Hippo signaling pathway);04550(Signaling pathways regulating pluripotency of stem cells);04934(Cushing syndrome);05165(Human papillomavirus infection);05200(Pathways in cancer);05210(Colorectal cancer);05213(Endometrial cancer);05217(Basal cell carcinoma);05224(Breast cancer);05225(Hepatocellular carcinoma);05226(Gastric cancer)	NA
circRNA4750	0	0	0	0	0	59.2387	29.0169	46.5843	0	0	0	0	0	4	2	3	-inf	down	0.0349399	1	yes	chr7	23415248	23418824	-	1	intergenic	intergenic_circRNA	intergenic_circRNA	chr7:23415247-23418824	NA	NA	NA	NA
hsa_circ_0005994	59.9514	42.7928	39.6494	0	0	0	0	0	4	2	3	0	0	0	0	0	inf	up	0.038142	1	yes	chr1	233090061	233095863	-	2	circRNA	ENST00000258229	PCNX2	23,22	pecanex 2 [Source:HGNC Symbol;Acc:HGNC:8736]	GO:0003674(molecular_function);GO:0005575(cellular_component);GO:0008150(biological_process);GO:0016020(membrane);GO:0016021(integral component of membrane)	NA	NA
hsa_circ_0031608	0	106.982	39.6494	23.9037	0	0	0	0	0	5	3	2	0	0	0	0	inf	up	0.0385181	1	yes	chr14	34586230	34609742	-	7	circRNA	ENST00000396526	SNX6	8,7,6,5,4,3,2	sorting nexin 6 [Source:HGNC Symbol;Acc:HGNC:14970]	GO:0005515(protein binding);GO:0005623(cell);GO:0005634(nucleus);GO:0005737(cytoplasm);GO:0005764(lysosome);GO:0005768(endosome);GO:0005769(early endosome);GO:0005829(cytosol);GO:0006886(intracellular protein transport);GO:0007175(negative regulation of epidermal growth factor-activated receptor activity);GO:0008289(lipid binding);GO:0015031(protein transport);GO:0016020(membrane);GO:0016241(regu…	04144(Endocytosis)	NA
hsa_circ_0000418	74.9392	192.568	52.8659	11.9519	33.1829	0	14.5084	0	5	9	4	1	2	0	1	0	2.80079	up	0.0391986	1	yes	chr12	69589485	69592159	+	2	circRNA	ENST00000299300	CCT2	7,8	chaperonin containing TCP1 subunit 2 [Source:HGNC Symbol;Acc:HGNC:1615]	GO:0000166(nucleotide binding);GO:0002199(zona pellucida receptor complex);GO:0005515(protein binding);GO:0005524(ATP binding);GO:0005576(extracellular region);GO:0005737(cytoplasm);GO:0005829(cytosol);GO:0005832(chaperonin-containing T-complex);GO:0005874(microtubule);GO:0006457(protein folding);GO:0007339(binding of sperm to zona pellucida);GO:0031625(ubiquitin protein ligase binding);GO:003221…	NA	NA
hsa_circ_0023966	14.9878	21.3964	79.2988	47.8075	0	0	14.5084	0	1	1	6	4	0	0	1	0	3.49424	up	0.0393491	1	yes	chr11	86556553	86559823	-	2	circRNA	ENST00000393324	ME3	3,2	malic enzyme 3 [Source:HGNC Symbol;Acc:HGNC:6985]	GO:0004470(malic enzyme activity);GO:0004471(malate dehydrogenase (decarboxylating) (NAD+) activity);GO:0004473(malate dehydrogenase (decarboxylating) (NADP+) activity);GO:0005739(mitochondrion);GO:0005759(mitochondrial matrix);GO:0006090(pyruvate metabolic process);GO:0006099(tricarboxylic acid cycle);GO:0006108(malate metabolic process);GO:0008948(oxaloacetate decarboxylase activity);GO:0009060…	00620(Pyruvate metabolism)	EC:1.1.1.40
ciRNA70	0	0	0	0	66.3659	0	29.0169	31.0562	0	0	0	0	4	0	2	2	-inf	down	0.0399408	1	yes	chr14	73089049	73089455	+	1	ciRNA	ENST00000527432	ENSG00000119707	chr14:73089048-73089455	RNA binding motif protein 25 [Source:HGNC Symbol;Acc:HGNC:23244]	GO:0000381(regulation of alternative mRNA splicing, via spliceosome);GO:0003676(nucleic acid binding);GO:0003723(RNA binding);GO:0003729(mRNA binding);GO:0005515(protein binding);GO:0005634(nucleus);GO:0005737(cytoplasm);GO:0006397(mRNA processing);GO:0008380(RNA splicing);GO:0016607(nuclear speck);GO:0042981(regulation of apoptotic process)	03040(Spliceosome)	NA
hsa_circ_0001993	0	0	0	11.9519	16.5915	44.429	58.0337	31.0562	0	0	0	1	1	3	4	2	-3.65072	down	0.0414178	1	yes	chr18	76849526	76871825	+	4	circRNA	ENST00000320610	ZNF236	2,3,4,5	zinc finger protein 236 [Source:HGNC Symbol;Acc:HGNC:13028]	GO:0000981(DNA-binding transcription factor activity, RNA polymerase II-specific);GO:0003676(nucleic acid binding);GO:0003677(DNA binding);GO:0003700(DNA-binding transcription factor activity);GO:0005634(nucleus);GO:0006355(regulation of transcription, DNA-templated);GO:0006357(regulation of transcription by RNA polymerase II);GO:0046872(metal ion binding);GO:0071333(cellular response to glucose …	NA	NA
circRNA4749	0	42.7928	0	0	0	59.2387	58.0337	139.753	0	2	0	0	0	4	4	9	-2.58647	down	0.0422656	1	yes	chr6	29890246	29944616	+	1	intergenic	intergenic_circRNA	intergenic_circRNA	chr6:29890245-29944616	NA	NA	NA	NA
hsa_circ_0008501	59.9514	64.1892	66.0824	35.8556	0	29.6194	0	15.5281	4	3	5	3	0	2	0	1	2.32411	up	0.0452541	1	yes	chr1	8541214	8614686	-	4	circRNA	ENST00000337907	RERE	8,7,6,5	arginine-glutamic acid dipeptide repeats [Source:HGNC Symbol;Acc:HGNC:9965]	GO:0000118(histone deacetylase complex);GO:0000981(DNA-binding transcription factor activity, RNA polymerase II-specific);GO:0001085(RNA polymerase II transcription factor binding);GO:0003677(DNA binding);GO:0003682(chromatin binding);GO:0003713(transcription coactivator activity);GO:0003714(transcription corepressor activity);GO:0005515(protein binding);GO:0005634(nucleus);GO:0006338(chromatin r…	NA	NA
circRNA4917	0	0	0	0	0	88.8581	72.5421	0	0	0	0	0	0	6	5	0	-inf	down	0.0457254	1	yes	chr2	147972740	147975975	-	3	circRNA	ENST00000495601	ENSG00000115947	chr2:147958866-147972739|chr2:147975975-148020633	origin recognition complex subunit 4 [Source:HGNC Symbol;Acc:HGNC:8490]	GO:0000082(G1/S transition of mitotic cell cycle);GO:0000166(nucleotide binding);GO:0000784(nuclear chromosome, telomeric region);GO:0000808(origin recognition complex);GO:0003677(DNA binding);GO:0003688(DNA replication origin binding);GO:0005515(protein binding);GO:0005524(ATP binding);GO:0005634(nucleus);GO:0005654(nucleoplasm);GO:0005664(nuclear origin of replication recognition complex);GO:00…	04110(Cell cycle)	NA
hsa_circ_0099482	0	0	0	0	66.3659	14.8097	0	46.5843	0	0	0	0	4	1	0	3	-inf	down	0.0466927	1	yes	chr12	92798892	92809156	-	4	circRNA	ENST00000322349	EEA1	21,20,19,18	early endosome antigen 1 [Source:HGNC Symbol;Acc:HGNC:3185]	GO:0003676(nucleic acid binding);GO:0005515(protein binding);GO:0005516(calmodulin binding);GO:0005545(1-phosphatidylinositol binding);GO:0005737(cytoplasm);GO:0005768(endosome);GO:0005769(early endosome);GO:0005829(cytosol);GO:0005969(serine-pyruvate aminotransferase complex);GO:0006897(endocytosis);GO:0006906(vesicle fusion);GO:0008270(zinc ion binding);GO:0016020(membrane);GO:0016189(synaptic …	04144(Endocytosis);04145(Phagosome);05152(Tuberculosis)	NA
ciRNA685	0	85.5856	0	95.6149	0	0	0	0	0	4	0	8	0	0	0	0	inf	up	0.0468379	1	yes	chr4	151415724	151482648	+	1	ciRNA	ENST00000435205	ENSG00000164142	chr4:151415723-151482648	family with sequence similarity 160 member A1 [Source:HGNC Symbol;Acc:HGNC:34237]	NA	NA	NA
hsa_circ_0089274	14.9878	0	79.2988	35.8556	0	0	0	0	1	0	6	3	0	0	0	0	inf	up	0.0469749	1	yes	chr9	132275256	132311856	-	13	circRNA	ENST00000224140	SETX	23,22,21,20,19,18,17,16,15,14,13,12,11	senataxin [Source:HGNC Symbol;Acc:HGNC:445]	GO:0000165(MAPK cascade);GO:0000166(nucleotide binding);GO:0000228(nuclear chromosome);GO:0000781(chromosome, telomeric region);GO:0001147(transcription termination site sequence-specific DNA binding);GO:0003677(DNA binding);GO:0003678(DNA helicase activity);GO:0003723(RNA binding);GO:0004386(helicase activity);GO:0005515(protein binding);GO:0005524(ATP binding);GO:0005634(nucleus);GO:0005654(nuc…	NA	NA
circRNA10326	0	42.7928	52.8659	35.8556	0	0	0	0	0	2	4	3	0	0	0	0	inf	up	0.048029	1	yes	chr17	8206491	8207840	-	5	circRNA	ENST00000316199	AURKB	7,6,5,4,3	aurora kinase B [Source:HGNC Symbol;Acc:HGNC:11390]	GO:0000122(negative regulation of transcription by RNA polymerase II);GO:0000166(nucleotide binding);GO:0000775(chromosome, centromeric region);GO:0000776(kinetochore);GO:0000779(condensed chromosome, centromeric region);GO:0000780(condensed nuclear chromosome, centromeric region);GO:0002903(negative regulation of B cell apoptotic process);GO:0004672(protein kinase activity);GO:0004674(protein se…	NA	EC:2.7.11.1
hsa_circ_0007813	44.9635	64.1892	118.948	107.567	282.055	162.906	159.593	124.225	3	3	9	9	17	11	11	8	-1.11845	down	0.048581	1	yes	chr10	12081472	12120267	+	15	circRNA	ENST00000263035	DHTKD1	2,3,4,5,6,7,8,9,10,11,12,13,14,15,16	dehydrogenase E1 and transketolase domain containing 1 [Source:HGNC Symbol;Acc:HGNC:23537]	GO:0002244(hematopoietic progenitor cell differentiation);GO:0004591(oxoglutarate dehydrogenase (succinyl-transferring) activity);GO:0005739(mitochondrion);GO:0005759(mitochondrial matrix);GO:0005829(cytosol);GO:0006091(generation of precursor metabolites and energy);GO:0006096(glycolytic process);GO:0006099(tricarboxylic acid cycle);GO:0016491(oxidoreductase activity);GO:0016624(oxidoreductase a…	00310(Lysine degradation);00380(Tryptophan metabolism)	EC:1.2.4.2
circRNA11505	0	64.1892	52.8659	23.9037	0	0	0	0	0	3	4	2	0	0	0	0	inf	up	0.0492447	1	yes	chr7	77581428	77583650	+	2	circRNA	ENST00000522115	ENSG00000127947	chr7:77571186-77581427|chr7:77583650-77585543	protein tyrosine phosphatase, non-receptor type 12 [Source:HGNC Symbol;Acc:HGNC:9645]	GO:0002102(podosome);GO:0004721(phosphoprotein phosphatase activity);GO:0004725(protein tyrosine phosphatase activity);GO:0004726(non-membrane spanning protein tyrosine phosphatase activity);GO:0005515(protein binding);GO:0005654(nucleoplasm);GO:0005737(cytoplasm);GO:0005829(cytosol);GO:0005925(focal adhesion);GO:0006470(protein dephosphorylation);GO:0016311(dephosphorylation);GO:0016787(hydrolas…	NA	NA
hsa_circ_0004833	0	0	0	0	16.5915	0	14.5084	108.697	0	0	0	0	1	0	1	7	-inf	down	0.0498615	1	yes	chr16	18797925	18798834	-	2	circRNA	ENST00000567078	AC138811	3,2	novel protein	GO:0003735(structural constituent of ribosome);GO:0005784(Sec61 translocon complex);GO:0005840(ribosome);GO:0006412(translation);GO:0006613(cotranslational protein targeting to membrane);GO:0016020(membrane);GO:0016021(integral component of membrane)	NA	NA
hsa_circ_0131214	14.9878	42.7928	52.8659	11.9519	0	0	0	0	1	2	4	1	0	0	0	0	inf	up	0.0499433	1	yes	chr6	158573420	158608750	+	9	circRNA	ENST00000367090	TMEM181	2,3,4,5,6,7,8,9,10	transmembrane protein 181 [Source:HGNC Symbol;Acc:HGNC:20958]	GO:0009405(pathogenesis);GO:0015643(toxic substance binding);GO:0016020(membrane);GO:0016021(integral component of membrane)	NA	NA
