# Supplementary material for: Comprehensive analysis of TGF-β-induced mRNAs and ncRNAs in hepatocellular carcinoma
Source: Aging (Albany NY). 2020 Oct 4;12(19):19399–420. doi: 10.18632/aging.103826 (PMC7732333; doi:10.18632/aging.103826)
Supplement: Supplementary Table 6 [file aging-12-103826-s007..xlsx]

## Sheet: Sheet1
Supplementary Table 6. Differentially expressed novel circRNAs upon treatment with TGF-β.
Accession	TGFB_1_srpbm	TGFB_2_srpbm	TGFB_3_srpbm	TGFB_4_srpbm	DMSO_1_srpbm	DMSO_2_srpbm	DMSO_3_srpbm	DMSO_4_srpbm	TGFB_1_count	TGFB_2_count	TGFB_3_count	TGFB_4_count	DMSO_1_count	DMSO_2_count	DMSO_3_count	DMSO_4_count	log2FoldChange	regulation	pvalue	qvalue	significant	chr	start	end	strand	exon Count	circType	isoformName	geneName	flankIntron	gene Discription	GO	KEGG	EC
circRNA2560	0	0	0	0	796.39	918.2	754.438	0	0	0	0	0	48	62	52	0	-inf	down	8.12716e-06	0.0351581	yes	chr8	127218810	127254192	-	1	intergenic	intergenic_circRNA	intergenic_circRNA	chr8:127218809-127254192	NA	NA	NA	NA
circRNA8331	119.903	171.171	105.732	155.374	0	0	0	46.5843	8	8	8	13	0	0	0	3	3.56722	up	0.00025521	0.55202	yes	chr3	143985544	143989837	+	2	circRNA	ENST00000495414	ENSG00000181744	chr3:143973562-143985543	divergent protein kinase domain 2A [Source:HGNC Symbol;Acc:HGNC:28490]	GO:0000139(Golgi membrane);GO:0005576(extracellular region);GO:0005615(extracellular space);GO:0005794(Golgi apparatus);GO:0014066(regulation of phosphatidylinositol 3-kinase signaling);GO:0030126(COPI vesicle coat);GO:0030137(COPI-coated vesicle);GO:0031410(cytoplasmic vesicle);GO:0034392(negative regulation of smooth muscle cell apoptotic process);GO:0060038(cardiac muscle cell proliferation)	NA	NA
circRNA9874	134.891	42.7928	52.8659	23.9037	0	0	0	0	9	2	4	2	0	0	0	0	inf	up	0.00199801	1	yes	chr17	75148529	75249008	-	1	intergenic	intergenic_circRNA	intergenic_circRNA	chr17:75148528-75249008	NA	NA	NA	NA
circRNA2634	0	106.982	0	23.9037	165.915	118.477	188.61	139.753	0	5	0	2	10	8	13	9	-2.227	down	0.00283449	1	yes	chr15	25405462	25411971	-	5	circRNA	ENST00000629252	ENSG00000114062	chr15:25375763-25405461|chr15:25411971-25438489	ubiquitin protein ligase E3A [Source:HGNC Symbol;Acc:HGNC:12496]	GO:0000209(protein polyubiquitination);GO:0000502(proteasome complex);GO:0001541(ovarian follicle development);GO:0003713(transcription coactivator activity);GO:0004842(ubiquitin-protein transferase activity);GO:0005515(protein binding);GO:0005634(nucleus);GO:0005737(cytoplasm);GO:0005829(cytosol);GO:0006508(proteolysis);GO:0006511(ubiquitin-dependent protein catabolic process);GO:0007420(brain d…	04120(Ubiquitin mediated proteolysis);05165(Human papillomavirus infection);05203(Viral carcinogenesis)	EC:2.3.2.26
circRNA9941	59.9514	64.1892	26.4329	35.8556	0	0	0	0	4	3	2	3	0	0	0	0	inf	up	0.00301578	1	yes	chr6	110746127	110773937	-	2	circRNA	ENST00000457688	ENSG00000155111	chr6:110670541-110746126|chr6:110773937-110815009	cyclin dependent kinase 19 [Source:HGNC Symbol;Acc:HGNC:19338]	GO:0000166(nucleotide binding);GO:0004672(protein kinase activity);GO:0004674(protein serine/threonine kinase activity);GO:0004693(cyclin-dependent protein serine/threonine kinase activity);GO:0005524(ATP binding);GO:0005634(nucleus);GO:0005829(cytosol);GO:0006468(protein phosphorylation);GO:0016301(kinase activity);GO:0016310(phosphorylation);GO:0016592(mediator complex);GO:0016740(transferase a…	NA	EC:2.7.11.22
circRNA3331	179.854	85.5856	52.8659	71.7112	0	14.8097	14.5084	15.5281	12	4	4	6	0	1	1	1	3.12048	up	0.00331133	1	yes	chr14	32090502	32117287	+	2	circRNA	ENST00000556611	ARHGAP5	2,3	Rho GTPase activating protein 5 [Source:HGNC Symbol;Acc:HGNC:675]	GO:0003924(GTPase activity);GO:0005096(GTPase activator activity);GO:0005515(protein binding);GO:0005525(GTP binding);GO:0005737(cytoplasm);GO:0005783(endoplasmic reticulum);GO:0005829(cytosol);GO:0005886(plasma membrane);GO:0007155(cell adhesion);GO:0007165(signal transduction);GO:0007266(Rho protein signal transduction);GO:0016020(membrane);GO:0030879(mammary gland development);GO:0042169(SH2 d…	04510(Focal adhesion);04670(Leukocyte transendothelial migration)	NA
circRNA2358	0	0	0	0	99.5488	103.668	43.5253	0	0	0	0	0	6	7	3	0	-inf	down	0.00369642	1	yes	chr15	85113874	85115487	+	2	circRNA	ENST00000394553	ENSG00000073417	chr15:85113447-85113873|chr15:85115487-85115984	phosphodiesterase 8A [Source:HGNC Symbol;Acc:HGNC:8793]	GO:0001934(positive regulation of protein phosphorylation);GO:0004114(3',5'-cyclic-nucleotide phosphodiesterase activity);GO:0004115(3',5'-cyclic-AMP phosphodiesterase activity);GO:0005829(cytosol);GO:0006198(cAMP catabolic process);GO:0006355(regulation of transcription, DNA-templated);GO:0007165(signal transduction);GO:0007186(G protein-coupled receptor signaling pathway);GO:0008081(phosphoric …	00230(Purine metabolism);04927(Cortisol synthesis and secretion);04934(Cushing syndrome);05032(Morphine addiction)	NA
ciRNA592	89.927	42.7928	26.4329	23.9037	0	0	0	0	6	2	2	2	0	0	0	0	inf	up	0.00569069	1	yes	chr10	103519532	103520296	-	1	ciRNA	ENST00000369780	ENSG00000107954	chr10:103519531-103520296	neuralized E3 ubiquitin protein ligase 1 [Source:HGNC Symbol;Acc:HGNC:7761]	GO:0004842(ubiquitin-protein transferase activity);GO:0005737(cytoplasm);GO:0005886(plasma membrane);GO:0006417(regulation of translation);GO:0006513(protein monoubiquitination);GO:0007219(Notch signaling pathway);GO:0007288(sperm axoneme assembly);GO:0007399(nervous system development);GO:0007420(brain development);GO:0007519(skeletal muscle tissue development);GO:0007595(lactation);GO:0008285(n…	NA	EC:2.3.2.27
circRNA2450	0	0	0	0	33.1829	0	43.5253	155.281	0	0	0	0	2	0	3	10	-inf	down	0.00756325	1	yes	chr1	155438328	155459898	-	2	circRNA	ENST00000392403	ENSG00000116539	chr1:155415923-155438327|chr1:155459898-155477886	ASH1 like histone lysine methyltransferase [Source:HGNC Symbol;Acc:HGNC:19088]	GO:0000981(DNA-binding transcription factor activity, RNA polymerase II-specific);GO:0001501(skeletal system development);GO:0002674(negative regulation of acute inflammatory response);GO:0003677(DNA binding);GO:0003682(chromatin binding);GO:0005515(protein binding);GO:0005634(nucleus);GO:0005654(nucleoplasm);GO:0005694(chromosome);GO:0005794(Golgi apparatus);GO:0005923(bicellular tight junction)…	00310(Lysine degradation)	EC:2.1.1.43
circRNA984	0	64.1892	26.4329	59.7593	199.098	148.097	203.118	46.5843	0	3	2	5	12	10	14	3	-1.98885	down	0.0119319	1	yes	chr18	58578814	58580548	-	1	circRNA	ENST00000361673	ALPK2	4	alpha kinase 2 [Source:HGNC Symbol;Acc:HGNC:20565]	GO:0004674(protein serine/threonine kinase activity);GO:0005524(ATP binding);GO:0006468(protein phosphorylation);GO:0016301(kinase activity);GO:0016310(phosphorylation);GO:0016740(transferase activity)	NA	NA
circRNA2284	29.9757	21.3964	52.8659	23.9037	116.14	103.668	174.101	46.5843	2	1	4	2	7	7	12	3	-1.78138	down	0.0140774	1	yes	chr8	127218810	127223666	-	2	circRNA	ENST00000641321	CASC19	2,1	cancer susceptibility 19 [Source:HGNC Symbol;Acc:HGNC:49476]	NA	NA	NA
circRNA9924	29.9757	64.1892	0	83.6631	0	0	0	0	2	3	0	7	0	0	0	0	inf	up	0.0141707	1	yes	chr1	210919641	210920069	-	1	circRNA	ENST00000639602	ENSG00000284299	chr1:210861194-210919640|chr1:210920069-211018864	novel protein	GO:0005216(ion channel activity);GO:0005249(voltage-gated potassium channel activity);GO:0005887(integral component of plasma membrane);GO:0006811(ion transport);GO:0006813(potassium ion transport);GO:0016020(membrane);GO:0016021(integral component of membrane);GO:0055085(transmembrane transport);GO:0071805(potassium ion transmembrane transport)	NA	NA
circRNA73	0	0	39.6494	23.9037	66.3659	103.668	72.5421	46.5843	0	0	3	2	4	7	5	3	-2.18583	down	0.0198876	1	yes	chr13	60439688	60467379	+	4	circRNA	ENST00000196169	TDRD3	2,3,4,5	tudor domain containing 3 [Source:HGNC Symbol;Acc:HGNC:20612]	GO:0003682(chromatin binding);GO:0003713(transcription coactivator activity);GO:0003723(RNA binding);GO:0005515(protein binding);GO:0005634(nucleus);GO:0005654(nucleoplasm);GO:0005737(cytoplasm);GO:0005794(Golgi apparatus);GO:0005829(cytosol);GO:0006325(chromatin organization);GO:0035064(methylated histone binding);GO:0035145(exon-exon junction complex);GO:1903508(positive regulation of nucleic a…	NA	NA
circRNA9897	89.927	0	145.381	0	0	0	0	0	6	0	11	0	0	0	0	0	inf	up	0.020167	1	yes	chr5	65988636	65994864	+	3	circRNA	ENST00000506030	ENSG00000112851	chr5:65926806-65988635|chr5:65994864-66012049	erbb2 interacting protein [Source:HGNC Symbol;Acc:HGNC:15842]	GO:0005102(signaling receptor binding);GO:0005176(ErbB-2 class receptor binding);GO:0005200(structural constituent of cytoskeleton);GO:0005515(protein binding);GO:0005604(basement membrane);GO:0005634(nucleus);GO:0005737(cytoplasm);GO:0005886(plasma membrane);GO:0006605(protein targeting);GO:0007155(cell adhesion);GO:0007165(signal transduction);GO:0007173(epidermal growth factor receptor signali…	04621(NOD-like receptor signaling pathway)	NA
circRNA9903	104.915	171.171	0	0	0	0	0	0	7	8	0	0	0	0	0	0	inf	up	0.0229981	1	yes	chr2	58221943	58232112	-	4	circRNA	ENST00000481670	ENSG00000115392	chr2:58213706-58221942|chr2:58232112-58241218	FA complementation group L [Source:HGNC Symbol;Acc:HGNC:20748]	GO:0004842(ubiquitin-protein transferase activity);GO:0005515(protein binding);GO:0005634(nucleus);GO:0005635(nuclear envelope);GO:0005654(nucleoplasm);GO:0005737(cytoplasm);GO:0006281(DNA repair);GO:0006513(protein monoubiquitination);GO:0006974(cellular response to DNA damage stimulus);GO:0007276(gamete generation);GO:0016567(protein ubiquitination);GO:0016604(nuclear body);GO:0016740(transfera…	03460(Fanconi anemia pathway);04120(Ubiquitin mediated proteolysis)	EC:2.3.2.27
circRNA5113	14.9878	64.1892	52.8659	47.8075	0	0	14.5084	0	1	3	4	4	0	0	1	0	3.63183	up	0.0251507	1	yes	chr13	113190872	113200516	-	6	circRNA	ENST00000622406	PCID2	7,6,5,4,3,2	PCI domain containing 2 [Source:HGNC Symbol;Acc:HGNC:25653]	GO:0000973(posttranscriptional tethering of RNA polymerase II gene DNA at nuclear periphery);GO:0003690(double-stranded DNA binding);GO:0003723(RNA binding);GO:0005515(protein binding);GO:0005575(cellular_component);GO:0005634(nucleus);GO:0005737(cytoplasm);GO:0006368(transcription elongation from RNA polymerase II promoter);GO:0016973(poly(A)+ mRNA export from nucleus);GO:0035327(transcriptional…	NA	NA
circRNA9849	29.9757	85.5856	0	47.8075	0	0	0	0	2	4	0	4	0	0	0	0	inf	up	0.0259534	1	yes	chr12	122546177	122547969	+	4	circRNA	ENST00000333479	ENSG00000184445	chr12:122544269-122546176|chr12:122547969-122549766	kinetochore associated 1 [Source:HGNC Symbol;Acc:HGNC:17255]	GO:0000775(chromosome, centromeric region);GO:0000776(kinetochore);GO:0000777(condensed chromosome kinetochore);GO:0000922(spindle pole);GO:0005515(protein binding);GO:0005634(nucleus);GO:0005694(chromosome);GO:0005737(cytoplasm);GO:0005819(spindle);GO:0005828(kinetochore microtubule);GO:0005829(cytosol);GO:0005856(cytoskeleton);GO:0005886(plasma membrane);GO:0007049(cell cycle);GO:0007093(mitoti…	NA	NA
circRNA1212	0	0	13.2165	11.9519	16.5915	59.2387	43.5253	77.6405	0	0	1	1	1	4	3	5	-2.96848	down	0.0261086	1	yes	chr7	133817325	133895735	+	2	circRNA	ENST00000253861	EXOC4	11,12	exocyst complex component 4 [Source:HGNC Symbol;Acc:HGNC:30389]	GO:0000145(exocyst);GO:0005515(protein binding);GO:0005737(cytoplasm);GO:0005829(cytosol);GO:0005886(plasma membrane);GO:0005902(microvillus);GO:0006612(protein targeting to membrane);GO:0006887(exocytosis);GO:0006893(Golgi to plasma membrane transport);GO:0006904(vesicle docking involved in exocytosis);GO:0007268(chemical synaptic transmission);GO:0015031(protein transport);GO:0016020(membrane);…	NA	NA
circRNA10042	29.9757	106.982	39.6494	0	0	0	0	0	2	5	3	0	0	0	0	0	inf	up	0.0287461	1	yes	chr1	21050867	21111383	-	3	circRNA	ENST00000356916	ENSG00000075151	chr1:21002808-21050866|chr1:21111383-21167961	eukaryotic translation initiation factor 4 gamma 3 [Source:HGNC Symbol;Acc:HGNC:3298]	GO:0000339(RNA cap binding);GO:0003723(RNA binding);GO:0003729(mRNA binding);GO:0003743(translation initiation factor activity);GO:0005515(protein binding);GO:0005829(cytosol);GO:0006412(translation);GO:0006413(translational initiation);GO:0006417(regulation of translation);GO:0006446(regulation of translational initiation);GO:0008135(translation factor activity, RNA binding);GO:0016281(eukaryoti…	03013(RNA transport);05416(Viral myocarditis)	NA
circRNA2527	0	0	26.4329	23.9037	49.7744	59.2387	58.0337	46.5843	0	0	2	2	3	4	4	3	-2.08544	down	0.0311338	1	yes	chr1	1482138	1518990	+	1	intergenic	intergenic_circRNA	intergenic_circRNA	chr1:1482137-1518990	NA	NA	NA	NA
circRNA13401	0	0	39.6494	143.422	0	0	0	0	0	0	3	12	0	0	0	0	inf	up	0.0318934	1	yes	chr3	71015550	71053773	-	5	circRNA	ENST00000650123	ENSG00000285708	chr3:71001059-71015549|chr3:71053773-71112536	novel protein	GO:0003677(DNA binding);GO:0003700(DNA-binding transcription factor activity);GO:0003723(RNA binding);GO:0003743(translation initiation factor activity);GO:0005634(nucleus);GO:0005654(nucleoplasm);GO:0005737(cytoplasm);GO:0006355(regulation of transcription, DNA-templated);GO:0006413(translational initiation);GO:0043565(sequence-specific DNA binding)	NA	NA
circRNA2344	0	0	0	0	49.7744	148.097	0	0	0	0	0	0	3	10	0	0	-inf	down	0.0336355	1	yes	chr4	51863438	51877854	+	4	circRNA	ENST00000451288	ENSG00000109184	chr4:51843742-51863437|chr4:51877854-51886568	defective in cullin neddylation 1 domain containing 4 [Source:HGNC Symbol;Acc:HGNC:28998]	GO:0000151(ubiquitin ligase complex);GO:0003674(molecular_function);GO:0005515(protein binding);GO:0005634(nucleus);GO:0008150(biological_process);GO:0031624(ubiquitin conjugating enzyme binding);GO:0032182(ubiquitin-like protein binding);GO:0045116(protein neddylation);GO:0051443(positive regulation of ubiquitin-protein transferase activity);GO:0097602(cullin family protein binding)	NA	NA
ciRNA105	0	0	0	0	33.1829	59.2387	43.5253	0	0	0	0	0	2	4	3	0	-inf	down	0.0346603	1	yes	chr11	309018	314356	+	1	ciRNA	ENST00000533141	ENSG00000185201	chr11:309017-314356	interferon induced transmembrane protein 2 [Source:HGNC Symbol;Acc:HGNC:5413]	GO:0002376(immune system process);GO:0005886(plasma membrane);GO:0006955(immune response);GO:0009615(response to virus);GO:0016020(membrane);GO:0016021(integral component of membrane);GO:0032991(protein-containing complex);GO:0034341(response to interferon-gamma);GO:0035455(response to interferon-alpha);GO:0035456(response to interferon-beta);GO:0045071(negative regulation of viral genome replica…	NA	NA
circRNA4750	0	0	0	0	0	59.2387	29.0169	46.5843	0	0	0	0	0	4	2	3	-inf	down	0.0349399	1	yes	chr7	23415248	23418824	-	1	intergenic	intergenic_circRNA	intergenic_circRNA	chr7:23415247-23418824	NA	NA	NA	NA
ciRNA70	0	0	0	0	66.3659	0	29.0169	31.0562	0	0	0	0	4	0	2	2	-inf	down	0.0399408	1	yes	chr14	73089049	73089455	+	1	ciRNA	ENST00000527432	ENSG00000119707	chr14:73089048-73089455	RNA binding motif protein 25 [Source:HGNC Symbol;Acc:HGNC:23244]	GO:0000381(regulation of alternative mRNA splicing, via spliceosome);GO:0003676(nucleic acid binding);GO:0003723(RNA binding);GO:0003729(mRNA binding);GO:0005515(protein binding);GO:0005634(nucleus);GO:0005737(cytoplasm);GO:0006397(mRNA processing);GO:0008380(RNA splicing);GO:0016607(nuclear speck);GO:0042981(regulation of apoptotic process)	03040(Spliceosome)	NA
circRNA4749	0	42.7928	0	0	0	59.2387	58.0337	139.753	0	2	0	0	0	4	4	9	-2.58647	down	0.0422656	1	yes	chr6	29890246	29944616	+	1	intergenic	intergenic_circRNA	intergenic_circRNA	chr6:29890245-29944616	NA	NA	NA	NA
circRNA4917	0	0	0	0	0	88.8581	72.5421	0	0	0	0	0	0	6	5	0	-inf	down	0.0457254	1	yes	chr2	147972740	147975975	-	3	circRNA	ENST00000495601	ENSG00000115947	chr2:147958866-147972739|chr2:147975975-148020633	origin recognition complex subunit 4 [Source:HGNC Symbol;Acc:HGNC:8490]	GO:0000082(G1/S transition of mitotic cell cycle);GO:0000166(nucleotide binding);GO:0000784(nuclear chromosome, telomeric region);GO:0000808(origin recognition complex);GO:0003677(DNA binding);GO:0003688(DNA replication origin binding);GO:0005515(protein binding);GO:0005524(ATP binding);GO:0005634(nucleus);GO:0005654(nucleoplasm);GO:0005664(nuclear origin of replication recognition complex);GO:00…	04110(Cell cycle)	NA
ciRNA685	0	85.5856	0	95.6149	0	0	0	0	0	4	0	8	0	0	0	0	inf	up	0.0468379	1	yes	chr4	151415724	151482648	+	1	ciRNA	ENST00000435205	ENSG00000164142	chr4:151415723-151482648	family with sequence similarity 160 member A1 [Source:HGNC Symbol;Acc:HGNC:34237]	NA	NA	NA
circRNA10326	0	42.7928	52.8659	35.8556	0	0	0	0	0	2	4	3	0	0	0	0	inf	up	0.048029	1	yes	chr17	8206491	8207840	-	5	circRNA	ENST00000316199	AURKB	7,6,5,4,3	aurora kinase B [Source:HGNC Symbol;Acc:HGNC:11390]	GO:0000122(negative regulation of transcription by RNA polymerase II);GO:0000166(nucleotide binding);GO:0000775(chromosome, centromeric region);GO:0000776(kinetochore);GO:0000779(condensed chromosome, centromeric region);GO:0000780(condensed nuclear chromosome, centromeric region);GO:0002903(negative regulation of B cell apoptotic process);GO:0004672(protein kinase activity);GO:0004674(protein se…	NA	EC:2.7.11.1
circRNA11505	0	64.1892	52.8659	23.9037	0	0	0	0	0	3	4	2	0	0	0	0	inf	up	0.0492447	1	yes	chr7	77581428	77583650	+	2	circRNA	ENST00000522115	ENSG00000127947	chr7:77571186-77581427|chr7:77583650-77585543	protein tyrosine phosphatase, non-receptor type 12 [Source:HGNC Symbol;Acc:HGNC:9645]	GO:0002102(podosome);GO:0004721(phosphoprotein phosphatase activity);GO:0004725(protein tyrosine phosphatase activity);GO:0004726(non-membrane spanning protein tyrosine phosphatase activity);GO:0005515(protein binding);GO:0005654(nucleoplasm);GO:0005737(cytoplasm);GO:0005829(cytosol);GO:0005925(focal adhesion);GO:0006470(protein dephosphorylation);GO:0016311(dephosphorylation);GO:0016787(hydrolas…	NA	NA
