# Supplementary material for: Comprehensive analysis of TGF-β-induced mRNAs and ncRNAs in hepatocellular carcinoma
Source: Aging (Albany NY). 2020 Oct 4;12(19):19399–420. doi: 10.18632/aging.103826 (PMC7732333; doi:10.18632/aging.103826)
Supplement: Supplementary Table 7 [file aging-12-103826-s008..xlsx]

## Sheet: Sheet1
Supplementary Table 7. Gene connections between these DElncRNAs and DEmRNAs.
mRNA							Differentiall expression						lncRNA							Differentiall expression		function
transcript_name	class_code	chr	start	end	gene_id	gene_name	Significant	GO	KEGG	KO_ENTRY	EC	Description	transcript_name	class_code	chr	start	end	gene_id	gene_name	Significant	Known/novel	cis/trans	cis location	trans energy	Pearson Correlation Coefficient
ENST00000529089	0	chr16	69996164	70065818	MSTRG.12909	AC009022	yes	NA	NA	NA	NA	novel transcript	ENST00000529089	0	chr16	69996164	70065818	MSTRG.12909	AC009022	yes	known	cis	1K	NA	1
ENST00000541196	0	chr6	31463182	31465704	MSTRG.27906	HCP5	yes	NA	NA	NA	NA	HLA complex P5 [Source:HGNC Symbol;Acc:HGNC:21659]	ENST00000541196	0	chr6	31463182	31465704	MSTRG.27906	HCP5	yes	known	cis	1K	NA	1
ENST00000449934	0	chr6	31403595	31415315	MSTRG.27906	MICA	yes	GO:0016021(integral component of membrane)	04650(Natural killer cell mediated cytotoxicity);05167(Kaposi sarcoma-associated herpesvirus infection)	K07985	NA	MHC class I polypeptide-related sequence A [Source:HGNC Symbol;Acc:HGNC:7090]	ENST00000541196	0	chr6	31463182	31465704	MSTRG.27906	HCP5	yes	known	cis	100K	NA	-0.729715
ENST00000591482	0	chr17	28357647	28381697	MSTRG.13921	AC002094	yes	NA	NA	NA	NA	novel transcript readthrough between TMEM199 and SARM1	ENST00000591482	0	chr17	28357647	28381697	MSTRG.13921	AC002094	yes	known	cis	1K	NA	1
ENST00000395404	0	chr17	28358043	28361455	MSTRG.13921	TMEM199	yes	GO:0005515(protein binding);GO:0005764(lysosome);GO:0005783(endoplasmic reticulum);GO:0005789(endoplasmic reticulum membrane);GO:0006879(cellular iron ion homeostasis);GO:0007042(lysosomal lumen acidification);GO:0016020(membrane);GO:0016021(integral component of membrane);GO:0016471(vacuolar proton-transporting V-type ATPase complex);GO:0030663(COPI-coated vesicle membrane);GO:0031410(cytoplasmi…	NA	NA	NA	transmembrane protein 199 [Source:HGNC Symbol;Acc:HGNC:18085]	ENST00000591482	0	chr17	28357647	28381697	MSTRG.13921	AC002094	yes	known	cis	1K	NA	-0.457308
MSTRG.25282.3	j	chr4	138170320	138242349	MSTRG.25282	SLC7A11	yes	NA	NA	NA	NA	NA	ENST00000510767	0	chr4	138089014	138178177	MSTRG.25281	SLC7A11-AS1	yes	known	cis	100K	NA	0.744927
ENST00000510767	0	chr4	138089014	138178177	MSTRG.25281	SLC7A11-AS1	yes	NA	NA	NA	NA	SLC7A11 antisense RNA 1 [Source:HGNC Symbol;Acc:HGNC:44064]	ENST00000510767	0	chr4	138089014	138178177	MSTRG.25281	SLC7A11-AS1	yes	known	cis	1K	NA	1
MSTRG.25282.1	j	chr4	138164097	138197256	MSTRG.25282	SLC7A11	yes	NA	NA	NA	NA	NA	ENST00000510767	0	chr4	138089014	138178177	MSTRG.25281	SLC7A11-AS1	yes	known	cis	100K	NA	0.796911
ENST00000280612	0	chr4	138164097	138242349	MSTRG.25282	SLC7A11	yes	GO:0005515(protein binding);GO:0005791(rough endoplasmic reticulum);GO:0005856(cytoskeleton);GO:0005886(plasma membrane);GO:0006749(glutathione metabolic process);GO:0006865(amino acid transport);GO:0006979(response to oxidative stress);GO:0007420(brain development);GO:0008542(visual learning);GO:0009636(response to toxic substance);GO:0009986(cell surface);GO:0014070(response to organic cyclic c…	04216(Ferroptosis)	K13869	NA	solute carrier family 7 member 11 [Source:HGNC Symbol;Acc:HGNC:11059]	ENST00000510767	0	chr4	138089014	138178177	MSTRG.25281	SLC7A11-AS1	yes	known	cis	100K	NA	0.579329
ENST00000600643	0	chr19	23399233	23416071	MSTRG.16932	LINC01224	yes	NA	NA	NA	NA	long intergenic non-protein coding RNA 1224 [Source:HGNC Symbol;Acc:HGNC:49676]	ENST00000600643	0	chr19	23399233	23416071	MSTRG.16932	LINC01224	yes	known	cis	1K	NA	1
ENST00000566733	0	chr6	3904920	3911979	MSTRG.27417	AL590004	yes	NA	NA	NA	NA	novel transcript	ENST00000566733	0	chr6	3904920	3911979	MSTRG.27417	AL590004	yes	known	cis	1K	NA	1
MSTRG.27415.1	p	chr6	3902216	3903784	MSTRG.27415	AL590004	yes	NA	NA	NA	NA	NA	ENST00000566733	0	chr6	3904920	3911979	MSTRG.27417	AL590004	yes	known	cis	10K	NA	0.994022
MSTRG.27416.1	p	chr6	3904063	3904863	MSTRG.27416	AL590004	yes	NA	NA	NA	NA	NA	ENST00000566733	0	chr6	3904920	3911979	MSTRG.27417	AL590004	yes	known	cis	1K	NA	0.940713
ENST00000587961	0	chr19	28606688	28615229	MSTRG.16965	AC079466	yes	NA	NA	NA	NA	novel transcript	ENST00000587961	0	chr19	28606688	28615229	MSTRG.16965	AC079466	yes	known	cis	1K	NA	1
ENST00000638358	0	chr1	145214851	145215905	MSTRG.1866	AC241585	yes	NA	NA	NA	NA	TEC	ENST00000638358	0	chr1	145214851	145215905	MSTRG.1866	AC241585	yes	known	cis	1K	NA	1
ENST00000560068	0	chr15	100913203	100919238	MSTRG.11666	AC015712	yes	NA	NA	NA	NA	novel transcript, antisense to LRRK1 and ALDH1A3	ENST00000560068	0	chr15	100913203	100919238	MSTRG.11666	AC015712	yes	known	cis	1K	NA	1
MSTRG.11667.5	j	chr15	100919357	101046423	MSTRG.11667	LRRK1	yes	NA	NA	NA	NA	NA	ENST00000560068	0	chr15	100913203	100919238	MSTRG.11666	AC015712	yes	known	cis	10K	NA	0.333735
ENST00000439725	0	chr11	1995176	1997460	MSTRG.4767	H19	yes	NA	NA	NA	NA	H19, imprinted maternally expressed transcript [Source:HGNC Symbol;Acc:HGNC:4713]	ENST00000439725	0	chr11	1995176	1997460	MSTRG.4767	H19	yes	known	cis	1K	NA	1
ENST00000436715	0	chr11	1995439	1996571	MSTRG.4767	H19	yes	NA	NA	NA	NA	H19, imprinted maternally expressed transcript [Source:HGNC Symbol;Acc:HGNC:4713]	ENST00000439725	0	chr11	1995176	1997460	MSTRG.4767	H19	yes	known	cis	1K	NA	0.832569
ENST00000559112	0	chr5	51377068	51383332	MSTRG.26025	AC010478	yes	NA	NA	NA	NA	novel transcript, antisense to ISL1	ENST00000559112	0	chr5	51377068	51383332	MSTRG.26025	AC010478	yes	known	cis	1K	NA	1
ENST00000503797	0	chr5	170757885	170767558	MSTRG.27143	AC008514	yes	NA	NA	NA	NA	novel transcript	ENST00000503797	0	chr5	170757885	170767558	MSTRG.27143	AC008514	yes	known	cis	1K	NA	1
ENST00000467530	0	chr1	85493417	85578150	MSTRG.1420	AC092807	yes	NA	NA	NA	NA	novel transcript	ENST00000467530	0	chr1	85493417	85578150	MSTRG.1420	AC092807	yes	known	cis	1K	NA	1
ENST00000499871	0	chr5	43014734	43018811	MSTRG.26002	AC025171	yes	NA	NA	NA	NA	novel transcript, sense overlapping to ANXA2R	ENST00000499871	0	chr5	43014734	43018811	MSTRG.26002	AC025171	yes	known	cis	1K	NA	1
ENST00000449589	0	chr1	173864016	173867989	MSTRG.2496	GAS5	yes	NA	NA	NA	NA	growth arrest specific 5 [Source:HGNC Symbol;Acc:HGNC:16355]	ENST00000449589	0	chr1	173864016	173867989	MSTRG.2496	GAS5	yes	known	cis	1K	NA	1
ENST00000649689	0	chr1	173824673	173858546	MSTRG.2495	DARS2	yes	GO:0000049(tRNA binding);GO:0000166(nucleotide binding);GO:0003676(nucleic acid binding);GO:0004812(aminoacyl-tRNA ligase activity);GO:0004815(aspartate-tRNA ligase activity);GO:0005515(protein binding);GO:0005524(ATP binding);GO:0005634(nucleus);GO:0005737(cytoplasm);GO:0005739(mitochondrion);GO:0005759(mitochondrial matrix);GO:0006412(translation);GO:0006418(tRNA aminoacylation for protein tran…	00970(Aminoacyl-tRNA biosynthesis)	K01876	EC:6.1.1.12	aspartyl-tRNA synthetase 2, mitochondrial [Source:HGNC Symbol;Acc:HGNC:25538]	ENST00000449589	0	chr1	173864016	173867989	MSTRG.2496	GAS5	yes	known	cis	100K	NA	-0.286579
ENST00000370520	0	chr20	62640719	62643304	MSTRG.20909	AL357033	yes	NA	NA	NA	NA	novel transcript, antisense to SLCO4A1	ENST00000370520	0	chr20	62640719	62643304	MSTRG.20909	AL357033	yes	known	cis	1K	NA	1
MSTRG.13193.2	j	chr16	86474529	86478881	MSTRG.13193	FENDRR	yes	NA	NA	NA	NA	NA	ENST00000599749	0	chr16	86487737	86509099	MSTRG.13193	FENDRR	yes	known	cis	100K	NA	0.451289
ENST00000599749	0	chr16	86487737	86509099	MSTRG.13193	FENDRR	yes	NA	NA	NA	NA	FOXF1 adjacent non-coding developmental regulatory RNA [Source:HGNC Symbol;Acc:HGNC:43894]	ENST00000599749	0	chr16	86487737	86509099	MSTRG.13193	FENDRR	yes	known	cis	1K	NA	1
ENST00000595886	0	chr16	86474529	86508860	MSTRG.13193	FENDRR	yes	NA	NA	NA	NA	FOXF1 adjacent non-coding developmental regulatory RNA [Source:HGNC Symbol;Acc:HGNC:43894]	ENST00000599749	0	chr16	86487737	86509099	MSTRG.13193	FENDRR	yes	known	cis	100K	NA	-0.111085
MSTRG.13194.1	i	chr16	86479092	86482594	MSTRG.13194	FENDRR	yes	NA	NA	NA	NA	NA	ENST00000599749	0	chr16	86487737	86509099	MSTRG.13193	FENDRR	yes	known	cis	10K	NA	0.76168
ENST00000598996	0	chr16	86487706	86490879	MSTRG.13193	FENDRR	yes	NA	NA	NA	NA	FOXF1 adjacent non-coding developmental regulatory RNA [Source:HGNC Symbol;Acc:HGNC:43894]	ENST00000599749	0	chr16	86487737	86509099	MSTRG.13193	FENDRR	yes	known	cis	1K	NA	-0.210813
ENST00000593604	0	chr16	86490268	86508877	MSTRG.13193	FENDRR	yes	NA	NA	NA	NA	FOXF1 adjacent non-coding developmental regulatory RNA [Source:HGNC Symbol;Acc:HGNC:43894]	ENST00000599749	0	chr16	86487737	86509099	MSTRG.13193	FENDRR	yes	known	cis	10K	NA	0.911791
MSTRG.13193.9	j	chr16	86490226	86508877	MSTRG.13193	FENDRR	yes	NA	NA	NA	NA	NA	ENST00000599749	0	chr16	86487737	86509099	MSTRG.13193	FENDRR	yes	known	cis	10K	NA	0.627968
ENST00000480872	0	chr17	48590481	48602337	MSTRG.14660	HOXB-AS3	yes	NA	NA	NA	NA	HOXB cluster antisense RNA 3 [Source:HGNC Symbol;Acc:HGNC:40283]	ENST00000480872	0	chr17	48590481	48602337	MSTRG.14660	HOXB-AS3	yes	known	cis	1K	NA	1
MSTRG.14661.18	j	chr17	48591257	48604986	MSTRG.14661	HOXB6	yes	NA	NA	NA	NA	NA	ENST00000480872	0	chr17	48590481	48602337	MSTRG.14660	HOXB-AS3	yes	known	cis	1K	NA	0.460667
ENST00000311626	0	chr17	48549885	48574487	MSTRG.14661	HOXB3	yes	GO:0000122(negative regulation of transcription by RNA polymerase II);GO:0000978(RNA polymerase II proximal promoter sequence-specific DNA binding);GO:0000981(DNA-binding transcription factor activity, RNA polymerase II-specific);GO:0001228(DNA-binding transcription activator activity, RNA polymerase II-specific);GO:0001525(angiogenesis);GO:0002244(hematopoietic progenitor cell differentiation);G…	NA	K09303	NA	homeobox B3 [Source:HGNC Symbol;Acc:HGNC:5114]	ENST00000480872	0	chr17	48590481	48602337	MSTRG.14660	HOXB-AS3	yes	known	cis	100K	NA	-0.0899497
ENST00000561961	0	chr9	122937623	122940326	MSTRG.33164	AC007066	yes	NA	NA	NA	NA	novel transcript, overlapping RABGAP1	ENST00000561961	0	chr9	122937623	122940326	MSTRG.33164	AC007066	yes	known	cis	1K	NA	1
MSTRG.13193.2	j	chr16	86474529	86478881	MSTRG.13193	FENDRR	yes	NA	NA	NA	NA	NA	ENST00000595886	0	chr16	86474529	86508860	MSTRG.13193	FENDRR	yes	known	cis	1K	NA	0.627762
ENST00000599749	0	chr16	86487737	86509099	MSTRG.13193	FENDRR	yes	NA	NA	NA	NA	FOXF1 adjacent non-coding developmental regulatory RNA [Source:HGNC Symbol;Acc:HGNC:43894]	ENST00000595886	0	chr16	86474529	86508860	MSTRG.13193	FENDRR	yes	known	cis	100K	NA	-0.111085
ENST00000595886	0	chr16	86474529	86508860	MSTRG.13193	FENDRR	yes	NA	NA	NA	NA	FOXF1 adjacent non-coding developmental regulatory RNA [Source:HGNC Symbol;Acc:HGNC:43894]	ENST00000595886	0	chr16	86474529	86508860	MSTRG.13193	FENDRR	yes	known	cis	1K	NA	1
MSTRG.13194.1	i	chr16	86479092	86482594	MSTRG.13194	FENDRR	yes	NA	NA	NA	NA	NA	ENST00000595886	0	chr16	86474529	86508860	MSTRG.13193	FENDRR	yes	known	cis	10K	NA	0.311579
ENST00000598996	0	chr16	86487706	86490879	MSTRG.13193	FENDRR	yes	NA	NA	NA	NA	FOXF1 adjacent non-coding developmental regulatory RNA [Source:HGNC Symbol;Acc:HGNC:43894]	ENST00000595886	0	chr16	86474529	86508860	MSTRG.13193	FENDRR	yes	known	cis	100K	NA	0.91527
ENST00000593604	0	chr16	86490268	86508877	MSTRG.13193	FENDRR	yes	NA	NA	NA	NA	FOXF1 adjacent non-coding developmental regulatory RNA [Source:HGNC Symbol;Acc:HGNC:43894]	ENST00000595886	0	chr16	86474529	86508860	MSTRG.13193	FENDRR	yes	known	cis	100K	NA	0.197144
MSTRG.13193.9	j	chr16	86490226	86508877	MSTRG.13193	FENDRR	yes	NA	NA	NA	NA	NA	ENST00000595886	0	chr16	86474529	86508860	MSTRG.13193	FENDRR	yes	known	cis	100K	NA	0.162099
ENST00000566025	c	chr13	31952580	31953361	MSTRG.8559	EEF1DP3	yes	NA	NA	NA	NA	eukaryotic translation elongation factor 1 delta pseudogene 3 [Source:HGNC Symbol;Acc:HGNC:30486]	ENST00000624392	0	chr13	31960325	31961946	MSTRG.8562	AC002525	yes	known	cis	10K	NA	0.944236
MSTRG.8561.1	i	chr13	31957713	31958548	MSTRG.8561	FRY	yes	NA	NA	NA	NA	NA	ENST00000624392	0	chr13	31960325	31961946	MSTRG.8562	AC002525	yes	known	cis	10K	NA	0.937353
ENST00000624392	0	chr13	31960325	31961946	MSTRG.8562	AC002525	yes	NA	NA	NA	NA	TEC	ENST00000624392	0	chr13	31960325	31961946	MSTRG.8562	AC002525	yes	known	cis	1K	NA	1
ENST00000647500	0	chr13	31945826	32299105	MSTRG.8559	FRY	yes	GO:0000902(cell morphogenesis);GO:0000922(spindle pole);GO:0004857(enzyme inhibitor activity);GO:0005737(cytoplasm);GO:0005815(microtubule organizing center);GO:0005856(cytoskeleton);GO:0005938(cell cortex);GO:0031175(neuron projection development);GO:0043086(negative regulation of catalytic activity);GO:1904428(negative regulation of tubulin deacetylation)	NA	NA	NA	FRY microtubule binding protein [Source:HGNC Symbol;Acc:HGNC:20367]	ENST00000624392	0	chr13	31960325	31961946	MSTRG.8562	AC002525	yes	known	cis	100K	NA	0.822267
MSTRG.8560.1	i	chr13	31954969	31956248	MSTRG.8560	FRY	yes	NA	NA	NA	NA	NA	ENST00000624392	0	chr13	31960325	31961946	MSTRG.8562	AC002525	yes	known	cis	10K	NA	0.903139
ENST00000490410	0	chr13	31950159	31953441	MSTRG.8559	FRY	yes	GO:0000902(cell morphogenesis);GO:0000922(spindle pole);GO:0004857(enzyme inhibitor activity);GO:0005737(cytoplasm);GO:0005815(microtubule organizing center);GO:0005856(cytoskeleton);GO:0005938(cell cortex);GO:0031175(neuron projection development);GO:0043086(negative regulation of catalytic activity);GO:1904428(negative regulation of tubulin deacetylation)	NA	NA	NA	FRY microtubule binding protein [Source:HGNC Symbol;Acc:HGNC:20367]	ENST00000624392	0	chr13	31960325	31961946	MSTRG.8562	AC002525	yes	known	cis	100K	NA	0.967856
ENST00000504474	0	chr5	93541872	93581297	MSTRG.26417	NR2F1-AS1	yes	NA	NA	NA	NA	NR2F1 antisense RNA 1 [Source:HGNC Symbol;Acc:HGNC:48622]	ENST00000504474	0	chr5	93541872	93581297	MSTRG.26417	NR2F1-AS1	yes	known	cis	1K	NA	1
ENST00000471864	0	chr9	38620474	38622466	MSTRG.32568	FAM201A	yes	NA	NA	NA	NA	family with sequence similarity 201 member A [Source:HGNC Symbol;Acc:HGNC:27239]	ENST00000471864	0	chr9	38620474	38622466	MSTRG.32568	FAM201A	yes	known	cis	1K	NA	1
ENST00000523313	0	chr8	75223898	75324316	MSTRG.31482	CASC9	yes	NA	NA	NA	NA	cancer susceptibility 9 [Source:HGNC Symbol;Acc:HGNC:48906]	ENST00000523313	0	chr8	75223898	75324316	MSTRG.31482	CASC9	yes	known	cis	1K	NA	1
ENST00000449469	0	chr20	38420592	38429330	MSTRG.20631	SNHG17	yes	NA	NA	NA	NA	small nucleolar RNA host gene 17 [Source:HGNC Symbol;Acc:HGNC:48600]	ENST00000449469	0	chr20	38420592	38429330	MSTRG.20631	SNHG17	yes	known	cis	1K	NA	1
ENST00000497086	0	chr1	153626332	153634340	MSTRG.2134	AL162258	yes	NA	NA	NA	NA	novel transcript	ENST00000497086	0	chr1	153626332	153634340	MSTRG.2134	AL162258	yes	known	cis	1K	NA	1
MSTRG.2134.8	j	chr1	153618811	153634397	MSTRG.2134	AL162258	yes	NA	NA	NA	NA	NA	ENST00000497086	0	chr1	153626332	153634340	MSTRG.2134	AL162258	yes	known	cis	10K	NA	-0.440858
ENST00000368694	0	chr1	153634066	153646306	MSTRG.2136	CHTOP	yes	GO:0000346(transcription export complex);GO:0003723(RNA binding);GO:0005515(protein binding);GO:0005634(nucleus);GO:0005654(nucleoplasm);GO:0005730(nucleolus);GO:0006405(RNA export from nucleus);GO:0006406(mRNA export from nucleus);GO:0008284(positive regulation of cell population proliferation);GO:0008327(methyl-CpG binding);GO:0016607(nuclear speck);GO:0031062(positive regulation of histone met…	NA	NA	NA	chromatin target of PRMT1 [Source:HGNC Symbol;Acc:HGNC:24511]	ENST00000497086	0	chr1	153626332	153634340	MSTRG.2134	AL162258	yes	known	cis	10K	NA	0.508216
ENST00000368690	0	chr1	153633982	153646305	MSTRG.2136	CHTOP	yes	GO:0000346(transcription export complex);GO:0003723(RNA binding);GO:0005515(protein binding);GO:0005634(nucleus);GO:0005654(nucleoplasm);GO:0005730(nucleolus);GO:0006405(RNA export from nucleus);GO:0006406(mRNA export from nucleus);GO:0008284(positive regulation of cell population proliferation);GO:0008327(methyl-CpG binding);GO:0016607(nuclear speck);GO:0031062(positive regulation of histone met…	NA	NA	NA	chromatin target of PRMT1 [Source:HGNC Symbol;Acc:HGNC:24511]	ENST00000497086	0	chr1	153626332	153634340	MSTRG.2134	AL162258	yes	known	cis	10K	NA	0.584303
ENST00000521369	0	chr8	106270144	106272899	MSTRG.31785	AC027031	yes	NA	NA	NA	NA	novel transcript	ENST00000521369	0	chr8	106270144	106272899	MSTRG.31785	AC027031	yes	known	cis	1K	NA	1
MSTRG.27194.1	i	chr5	174338789	174341925	MSTRG.27194	LINC01411	yes	NA	NA	NA	NA	NA	ENST00000507361	0	chr5	174336354	174529982	MSTRG.27193	LINC01411	yes	known	cis	10K	NA	0.787544
ENST00000507361	0	chr5	174336354	174529982	MSTRG.27193	LINC01411	yes	NA	NA	NA	NA	long intergenic non-protein coding RNA 1411 [Source:HGNC Symbol;Acc:HGNC:50703]	ENST00000507361	0	chr5	174336354	174529982	MSTRG.27193	LINC01411	yes	known	cis	1K	NA	1
MSTRG.27193.1	j	chr5	174336231	174362711	MSTRG.27193	LINC01411	yes	NA	NA	NA	NA	NA	ENST00000507361	0	chr5	174336354	174529982	MSTRG.27193	LINC01411	yes	known	cis	1K	NA	0.985199
MSTRG.27195.1	i	chr5	174356839	174357641	MSTRG.27195	LINC01411	yes	NA	NA	NA	NA	NA	ENST00000507361	0	chr5	174336354	174529982	MSTRG.27193	LINC01411	yes	known	cis	100K	NA	0.683263
MSTRG.13193.2	j	chr16	86474529	86478881	MSTRG.13193	FENDRR	yes	NA	NA	NA	NA	NA	ENST00000598996	0	chr16	86487706	86490879	MSTRG.13193	FENDRR	yes	known	cis	100K	NA	0.737791
ENST00000599749	0	chr16	86487737	86509099	MSTRG.13193	FENDRR	yes	NA	NA	NA	NA	FOXF1 adjacent non-coding developmental regulatory RNA [Source:HGNC Symbol;Acc:HGNC:43894]	ENST00000598996	0	chr16	86487706	86490879	MSTRG.13193	FENDRR	yes	known	cis	1K	NA	-0.210813
ENST00000595886	0	chr16	86474529	86508860	MSTRG.13193	FENDRR	yes	NA	NA	NA	NA	FOXF1 adjacent non-coding developmental regulatory RNA [Source:HGNC Symbol;Acc:HGNC:43894]	ENST00000598996	0	chr16	86487706	86490879	MSTRG.13193	FENDRR	yes	known	cis	100K	NA	0.91527
MSTRG.13194.1	i	chr16	86479092	86482594	MSTRG.13194	FENDRR	yes	NA	NA	NA	NA	NA	ENST00000598996	0	chr16	86487706	86490879	MSTRG.13193	FENDRR	yes	known	cis	10K	NA	0.331292
ENST00000598996	0	chr16	86487706	86490879	MSTRG.13193	FENDRR	yes	NA	NA	NA	NA	FOXF1 adjacent non-coding developmental regulatory RNA [Source:HGNC Symbol;Acc:HGNC:43894]	ENST00000598996	0	chr16	86487706	86490879	MSTRG.13193	FENDRR	yes	known	cis	1K	NA	1
ENST00000593604	0	chr16	86490268	86508877	MSTRG.13193	FENDRR	yes	NA	NA	NA	NA	FOXF1 adjacent non-coding developmental regulatory RNA [Source:HGNC Symbol;Acc:HGNC:43894]	ENST00000598996	0	chr16	86487706	86490879	MSTRG.13193	FENDRR	yes	known	cis	10K	NA	0.155228
MSTRG.13193.9	j	chr16	86490226	86508877	MSTRG.13193	FENDRR	yes	NA	NA	NA	NA	NA	ENST00000598996	0	chr16	86487706	86490879	MSTRG.13193	FENDRR	yes	known	cis	10K	NA	0.362097
ENST00000434411	0	chr17	77088631	77094990	MSTRG.15235	SNHG20	yes	NA	NA	NA	NA	small nucleolar RNA host gene 20 [Source:HGNC Symbol;Acc:HGNC:33099]	ENST00000434411	0	chr17	77088631	77094990	MSTRG.15235	SNHG20	yes	known	cis	1K	NA	1
ENST00000491231	0	chr11	62806937	62832042	MSTRG.5452	STX5	yes	GO:0000139(Golgi membrane);GO:0000149(SNARE binding);GO:0005484(SNAP receptor activity);GO:0005515(protein binding);GO:0005783(endoplasmic reticulum);GO:0005789(endoplasmic reticulum membrane);GO:0005794(Golgi apparatus);GO:0005829(cytosol);GO:0006886(intracellular protein transport);GO:0006888(endoplasmic reticulum to Golgi vesicle-mediated transport);GO:0006906(vesicle fusion);GO:0012505(endome…	04130(SNARE interactions in vesicular transport)	K08490	NA	syntaxin 5 [Source:HGNC Symbol;Acc:HGNC:11440]	ENST00000540725	0	chr11	62851988	62855746	MSTRG.5465	SNHG1	yes	known	cis	100K	NA	-0.515191
ENST00000540725	0	chr11	62851988	62855746	MSTRG.5465	SNHG1	yes	NA	NA	NA	NA	small nucleolar RNA host gene 1 [Source:HGNC Symbol;Acc:HGNC:32688]	ENST00000540725	0	chr11	62851988	62855746	MSTRG.5465	SNHG1	yes	known	cis	1K	NA	1
ENST00000537869	0	chr11	62851991	62855460	MSTRG.5465	SNHG1	yes	NA	NA	NA	NA	small nucleolar RNA host gene 1 [Source:HGNC Symbol;Acc:HGNC:32688]	ENST00000540725	0	chr11	62851988	62855746	MSTRG.5465	SNHG1	yes	known	cis	1K	NA	0.909539
ENST00000457660	0	chr11	62881805	62886526	MSTRG.5466	SLC3A2	yes	GO:0003723(RNA binding);GO:0003725(double-stranded RNA binding);GO:0003824(catalytic activity);GO:0005432(calcium:sodium antiporter activity);GO:0005515(protein binding);GO:0005634(nucleus);GO:0005829(cytosol);GO:0005886(plasma membrane);GO:0005975(carbohydrate metabolic process);GO:0006816(calcium ion transport);GO:0006865(amino acid transport);GO:0009986(cell surface);GO:0015175(neutral amino a…	04150(mTOR signaling pathway);04216(Ferroptosis);04974(Protein digestion and absorption)	K06519	NA	solute carrier family 3 member 2 [Source:HGNC Symbol;Acc:HGNC:11026]	ENST00000540725	0	chr11	62851988	62855746	MSTRG.5465	SNHG1	yes	known	cis	100K	NA	0.659958
ENST00000338663	0	chr11	62880872	62888855	MSTRG.5466	SLC3A2	yes	GO:0003723(RNA binding);GO:0003725(double-stranded RNA binding);GO:0003824(catalytic activity);GO:0005432(calcium:sodium antiporter activity);GO:0005515(protein binding);GO:0005634(nucleus);GO:0005829(cytosol);GO:0005886(plasma membrane);GO:0005975(carbohydrate metabolic process);GO:0006816(calcium ion transport);GO:0006865(amino acid transport);GO:0009986(cell surface);GO:0015175(neutral amino a…	04150(mTOR signaling pathway);04216(Ferroptosis);04974(Protein digestion and absorption)	K06519	NA	solute carrier family 3 member 2 [Source:HGNC Symbol;Acc:HGNC:11026]	ENST00000540725	0	chr11	62851988	62855746	MSTRG.5465	SNHG1	yes	known	cis	100K	NA	0.796306
ENST00000539921	0	chr11	62851988	62855236	MSTRG.5465	SNHG1	yes	NA	NA	NA	NA	small nucleolar RNA host gene 1 [Source:HGNC Symbol;Acc:HGNC:32688]	ENST00000540725	0	chr11	62851988	62855746	MSTRG.5465	SNHG1	yes	known	cis	1K	NA	0.986055
ENST00000538682	0	chr11	62881709	62888455	MSTRG.5466	SLC3A2	yes	GO:0003723(RNA binding);GO:0003725(double-stranded RNA binding);GO:0003824(catalytic activity);GO:0005432(calcium:sodium antiporter activity);GO:0005515(protein binding);GO:0005634(nucleus);GO:0005829(cytosol);GO:0005886(plasma membrane);GO:0005975(carbohydrate metabolic process);GO:0006816(calcium ion transport);GO:0006865(amino acid transport);GO:0009986(cell surface);GO:0015175(neutral amino a…	04150(mTOR signaling pathway);04216(Ferroptosis);04974(Protein digestion and absorption)	K06519	NA	solute carrier family 3 member 2 [Source:HGNC Symbol;Acc:HGNC:11026]	ENST00000540725	0	chr11	62851988	62855746	MSTRG.5465	SNHG1	yes	known	cis	100K	NA	0.845621
ENST00000496841	0	chr2	127619998	127637729	MSTRG.19051	MYO7B	yes	GO:0000166(nucleotide binding);GO:0003774(motor activity);GO:0003779(actin binding);GO:0005515(protein binding);GO:0005524(ATP binding);GO:0005737(cytoplasm);GO:0005856(cytoskeleton);GO:0005902(microvillus);GO:0005903(brush border);GO:0016459(myosin complex);GO:0030154(cell differentiation);GO:0042995(cell projection);GO:0051015(actin filament binding);GO:0090651(apical cytoplasm);GO:1904970(brus…	NA	K21868	NA	myosin VIIB [Source:HGNC Symbol;Acc:HGNC:7607]	ENST00000609697	0	chr2	127625997	127626848	MSTRG.19052	AC010976	yes	known	cis	10K	NA	0.94018
ENST00000491278	0	chr2	127620035	127637725	MSTRG.19051	MYO7B	yes	GO:0000166(nucleotide binding);GO:0003774(motor activity);GO:0003779(actin binding);GO:0005515(protein binding);GO:0005524(ATP binding);GO:0005737(cytoplasm);GO:0005856(cytoskeleton);GO:0005902(microvillus);GO:0005903(brush border);GO:0016459(myosin complex);GO:0030154(cell differentiation);GO:0042995(cell projection);GO:0051015(actin filament binding);GO:0090651(apical cytoplasm);GO:1904970(brus…	NA	K21868	NA	myosin VIIB [Source:HGNC Symbol;Acc:HGNC:7607]	ENST00000609697	0	chr2	127625997	127626848	MSTRG.19052	AC010976	yes	known	cis	10K	NA	0.910693
ENST00000609697	0	chr2	127625997	127626848	MSTRG.19052	AC010976	yes	NA	NA	NA	NA	novel transcript, antisense to MYO7B	ENST00000609697	0	chr2	127625997	127626848	MSTRG.19052	AC010976	yes	known	cis	1K	NA	1
ENST00000322313	0	chr2	127701027	127811171	MSTRG.19044	WDR33	yes	GO:0000398(mRNA splicing, via spliceosome);GO:0001650(fibrillar center);GO:0003723(RNA binding);GO:0005515(protein binding);GO:0005581(collagen trimer);GO:0005634(nucleus);GO:0005654(nucleoplasm);GO:0005847(mRNA cleavage and polyadenylation specificity factor complex);GO:0006301(postreplication repair);GO:0006369(termination of RNA polymerase II transcription);GO:0006378(mRNA polyadenylation);GO:…	03015(mRNA surveillance pathway)	K15542	NA	WD repeat domain 33 [Source:HGNC Symbol;Acc:HGNC:25651]	ENST00000609697	0	chr2	127625997	127626848	MSTRG.19052	AC010976	yes	known	cis	100K	NA	0.438013
ENST00000491231	0	chr11	62806937	62832042	MSTRG.5452	STX5	yes	GO:0000139(Golgi membrane);GO:0000149(SNARE binding);GO:0005484(SNAP receptor activity);GO:0005515(protein binding);GO:0005783(endoplasmic reticulum);GO:0005789(endoplasmic reticulum membrane);GO:0005794(Golgi apparatus);GO:0005829(cytosol);GO:0006886(intracellular protein transport);GO:0006888(endoplasmic reticulum to Golgi vesicle-mediated transport);GO:0006906(vesicle fusion);GO:0012505(endome…	04130(SNARE interactions in vesicular transport)	K08490	NA	syntaxin 5 [Source:HGNC Symbol;Acc:HGNC:11440]	ENST00000537869	0	chr11	62851991	62855460	MSTRG.5465	SNHG1	yes	known	cis	100K	NA	-0.606344
ENST00000540725	0	chr11	62851988	62855746	MSTRG.5465	SNHG1	yes	NA	NA	NA	NA	small nucleolar RNA host gene 1 [Source:HGNC Symbol;Acc:HGNC:32688]	ENST00000537869	0	chr11	62851991	62855460	MSTRG.5465	SNHG1	yes	known	cis	1K	NA	0.909539
ENST00000537869	0	chr11	62851991	62855460	MSTRG.5465	SNHG1	yes	NA	NA	NA	NA	small nucleolar RNA host gene 1 [Source:HGNC Symbol;Acc:HGNC:32688]	ENST00000537869	0	chr11	62851991	62855460	MSTRG.5465	SNHG1	yes	known	cis	1K	NA	1
ENST00000457660	0	chr11	62881805	62886526	MSTRG.5466	SLC3A2	yes	GO:0003723(RNA binding);GO:0003725(double-stranded RNA binding);GO:0003824(catalytic activity);GO:0005432(calcium:sodium antiporter activity);GO:0005515(protein binding);GO:0005634(nucleus);GO:0005829(cytosol);GO:0005886(plasma membrane);GO:0005975(carbohydrate metabolic process);GO:0006816(calcium ion transport);GO:0006865(amino acid transport);GO:0009986(cell surface);GO:0015175(neutral amino a…	04150(mTOR signaling pathway);04216(Ferroptosis);04974(Protein digestion and absorption)	K06519	NA	solute carrier family 3 member 2 [Source:HGNC Symbol;Acc:HGNC:11026]	ENST00000537869	0	chr11	62851991	62855460	MSTRG.5465	SNHG1	yes	known	cis	100K	NA	0.845245
ENST00000338663	0	chr11	62880872	62888855	MSTRG.5466	SLC3A2	yes	GO:0003723(RNA binding);GO:0003725(double-stranded RNA binding);GO:0003824(catalytic activity);GO:0005432(calcium:sodium antiporter activity);GO:0005515(protein binding);GO:0005634(nucleus);GO:0005829(cytosol);GO:0005886(plasma membrane);GO:0005975(carbohydrate metabolic process);GO:0006816(calcium ion transport);GO:0006865(amino acid transport);GO:0009986(cell surface);GO:0015175(neutral amino a…	04150(mTOR signaling pathway);04216(Ferroptosis);04974(Protein digestion and absorption)	K06519	NA	solute carrier family 3 member 2 [Source:HGNC Symbol;Acc:HGNC:11026]	ENST00000537869	0	chr11	62851991	62855460	MSTRG.5465	SNHG1	yes	known	cis	100K	NA	0.913858
ENST00000539921	0	chr11	62851988	62855236	MSTRG.5465	SNHG1	yes	NA	NA	NA	NA	small nucleolar RNA host gene 1 [Source:HGNC Symbol;Acc:HGNC:32688]	ENST00000537869	0	chr11	62851991	62855460	MSTRG.5465	SNHG1	yes	known	cis	1K	NA	0.880542
ENST00000538682	0	chr11	62881709	62888455	MSTRG.5466	SLC3A2	yes	GO:0003723(RNA binding);GO:0003725(double-stranded RNA binding);GO:0003824(catalytic activity);GO:0005432(calcium:sodium antiporter activity);GO:0005515(protein binding);GO:0005634(nucleus);GO:0005829(cytosol);GO:0005886(plasma membrane);GO:0005975(carbohydrate metabolic process);GO:0006816(calcium ion transport);GO:0006865(amino acid transport);GO:0009986(cell surface);GO:0015175(neutral amino a…	04150(mTOR signaling pathway);04216(Ferroptosis);04974(Protein digestion and absorption)	K06519	NA	solute carrier family 3 member 2 [Source:HGNC Symbol;Acc:HGNC:11026]	ENST00000537869	0	chr11	62851991	62855460	MSTRG.5465	SNHG1	yes	known	cis	100K	NA	0.935405
MSTRG.13193.2	j	chr16	86474529	86478881	MSTRG.13193	FENDRR	yes	NA	NA	NA	NA	NA	ENST00000593604	0	chr16	86490268	86508877	MSTRG.13193	FENDRR	yes	known	cis	100K	NA	0.736814
ENST00000599749	0	chr16	86487737	86509099	MSTRG.13193	FENDRR	yes	NA	NA	NA	NA	FOXF1 adjacent non-coding developmental regulatory RNA [Source:HGNC Symbol;Acc:HGNC:43894]	ENST00000593604	0	chr16	86490268	86508877	MSTRG.13193	FENDRR	yes	known	cis	10K	NA	0.911791
ENST00000595886	0	chr16	86474529	86508860	MSTRG.13193	FENDRR	yes	NA	NA	NA	NA	FOXF1 adjacent non-coding developmental regulatory RNA [Source:HGNC Symbol;Acc:HGNC:43894]	ENST00000593604	0	chr16	86490268	86508877	MSTRG.13193	FENDRR	yes	known	cis	100K	NA	0.197144
MSTRG.13194.1	i	chr16	86479092	86482594	MSTRG.13194	FENDRR	yes	NA	NA	NA	NA	NA	ENST00000593604	0	chr16	86490268	86508877	MSTRG.13193	FENDRR	yes	known	cis	100K	NA	0.946577
ENST00000598996	0	chr16	86487706	86490879	MSTRG.13193	FENDRR	yes	NA	NA	NA	NA	FOXF1 adjacent non-coding developmental regulatory RNA [Source:HGNC Symbol;Acc:HGNC:43894]	ENST00000593604	0	chr16	86490268	86508877	MSTRG.13193	FENDRR	yes	known	cis	10K	NA	0.155228
ENST00000593604	0	chr16	86490268	86508877	MSTRG.13193	FENDRR	yes	NA	NA	NA	NA	FOXF1 adjacent non-coding developmental regulatory RNA [Source:HGNC Symbol;Acc:HGNC:43894]	ENST00000593604	0	chr16	86490268	86508877	MSTRG.13193	FENDRR	yes	known	cis	1K	NA	1
MSTRG.13193.9	j	chr16	86490226	86508877	MSTRG.13193	FENDRR	yes	NA	NA	NA	NA	NA	ENST00000593604	0	chr16	86490268	86508877	MSTRG.13193	FENDRR	yes	known	cis	1K	NA	0.775426
ENST00000571197	0	chr16	68225969	68229145	MSTRG.12857	AC020978	yes	NA	NA	NA	NA	novel transcript, antisense to NFATC3	ENST00000571197	0	chr16	68225969	68229145	MSTRG.12857	AC020978	yes	known	cis	1K	NA	1
ENST00000568479	0	chrX	24465286	24550466	MSTRG.33760	PDK3	yes	GO:0000166(nucleotide binding);GO:0004672(protein kinase activity);GO:0004674(protein serine/threonine kinase activity);GO:0004740(pyruvate dehydrogenase (acetyl-transferring) kinase activity);GO:0005515(protein binding);GO:0005524(ATP binding);GO:0005730(nucleolus);GO:0005739(mitochondrion);GO:0005759(mitochondrial matrix);GO:0005975(carbohydrate metabolic process);GO:0006006(glucose metabolic p…	NA	NA	NA	pyruvate dehydrogenase kinase 3 [Source:HGNC Symbol;Acc:HGNC:8811]	ENST00000568479	0	chrX	24465286	24550466	MSTRG.33760	PDK3	yes	known	cis	1K	NA	1
ENST00000395684	0	chr17	18327873	18341655	MSTRG.13776	SHMT1	yes	GO:0000900(translation repressor activity, mRNA regulatory element binding);GO:0003824(catalytic activity);GO:0004372(glycine hydroxymethyltransferase activity);GO:0004843(thiol-dependent ubiquitin-specific protease activity);GO:0005515(protein binding);GO:0005634(nucleus);GO:0005737(cytoplasm);GO:0005829(cytosol);GO:0006231(dTMP biosynthetic process);GO:0006544(glycine metabolic process);GO:0006…	00260(Glycine, serine and threonine metabolism);00630(Glyoxylate and dicarboxylate metabolism);00670(One carbon pool by folate);01523(Antifolate resistance)	NA	NA	serine hydroxymethyltransferase 1 [Source:HGNC Symbol;Acc:HGNC:10850]	ENST00000579352	0	chr17	18379855	18388984	MSTRG.13774	AL353997	yes	known	cis	100K	NA	0.881644
ENST00000579352	0	chr17	18379855	18388984	MSTRG.13774	AL353997	yes	NA	NA	NA	NA	novel transcript	ENST00000579352	0	chr17	18379855	18388984	MSTRG.13774	AL353997	yes	known	cis	1K	NA	1
ENST00000399134	0	chr17	18377778	18389647	MSTRG.13773	EVPLL	yes	GO:0001533(cornified envelope);GO:0005198(structural molecule activity);GO:0005737(cytoplasm);GO:0005882(intermediate filament);GO:0008544(epidermis development);GO:0016020(membrane);GO:0019215(intermediate filament binding);GO:0030674(protein binding, bridging);GO:0042060(wound healing);GO:0045104(intermediate filament cytoskeleton organization)	NA	NA	NA	envoplakin like [Source:HGNC Symbol;Acc:HGNC:35236]	ENST00000579352	0	chr17	18379855	18388984	MSTRG.13774	AL353997	yes	known	cis	10K	NA	0.852159
MSTRG.13776.6	j	chr17	18328528	18363451	MSTRG.13776	SHMT1	yes	NA	NA	NA	NA	NA	ENST00000579352	0	chr17	18379855	18388984	MSTRG.13774	AL353997	yes	known	cis	100K	NA	-0.472159
ENST00000454046	0	chr7	97852131	97869813	MSTRG.30144	ASNS	yes	GO:0000166(nucleotide binding);GO:0001889(liver development);GO:0004066(asparagine synthase (glutamine-hydrolyzing) activity);GO:0005515(protein binding);GO:0005524(ATP binding);GO:0005829(cytosol);GO:0006520(cellular amino acid metabolic process);GO:0006529(asparagine biosynthetic process);GO:0006541(glutamine metabolic process);GO:0008652(cellular amino acid biosynthetic process);GO:0009416(res…	00250(Alanine, aspartate and glutamate metabolism)	NA	NA	asparagine synthetase (glutamine-hydrolyzing) [Source:HGNC Symbol;Acc:HGNC:753]	ENST00000641784	0	chr7	97851688	97972985	MSTRG.30144	AC079781	yes	known	cis	1K	NA	0.568531
ENST00000462436	0	chr7	97854991	97858379	MSTRG.30144	ASNS	yes	GO:0000166(nucleotide binding);GO:0001889(liver development);GO:0004066(asparagine synthase (glutamine-hydrolyzing) activity);GO:0005515(protein binding);GO:0005524(ATP binding);GO:0005829(cytosol);GO:0006520(cellular amino acid metabolic process);GO:0006529(asparagine biosynthetic process);GO:0006541(glutamine metabolic process);GO:0008652(cellular amino acid biosynthetic process);GO:0009416(res…	00250(Alanine, aspartate and glutamate metabolism)	NA	NA	asparagine synthetase (glutamine-hydrolyzing) [Source:HGNC Symbol;Acc:HGNC:753]	ENST00000641784	0	chr7	97851688	97972985	MSTRG.30144	AC079781	yes	known	cis	10K	NA	0.602649
ENST00000437657	0	chr7	97864259	97871879	MSTRG.30144	ASNS	yes	GO:0000166(nucleotide binding);GO:0001889(liver development);GO:0004066(asparagine synthase (glutamine-hydrolyzing) activity);GO:0005515(protein binding);GO:0005524(ATP binding);GO:0005829(cytosol);GO:0006520(cellular amino acid metabolic process);GO:0006529(asparagine biosynthetic process);GO:0006541(glutamine metabolic process);GO:0008652(cellular amino acid biosynthetic process);GO:0009416(res…	00250(Alanine, aspartate and glutamate metabolism)	NA	NA	asparagine synthetase (glutamine-hydrolyzing) [Source:HGNC Symbol;Acc:HGNC:753]	ENST00000641784	0	chr7	97851688	97972985	MSTRG.30144	AC079781	yes	known	cis	100K	NA	0.571801
ENST00000495255	0	chr7	97863096	97869184	MSTRG.30144	ASNS	yes	GO:0000166(nucleotide binding);GO:0001889(liver development);GO:0004066(asparagine synthase (glutamine-hydrolyzing) activity);GO:0005515(protein binding);GO:0005524(ATP binding);GO:0005829(cytosol);GO:0006520(cellular amino acid metabolic process);GO:0006529(asparagine biosynthetic process);GO:0006541(glutamine metabolic process);GO:0008652(cellular amino acid biosynthetic process);GO:0009416(res…	00250(Alanine, aspartate and glutamate metabolism)	NA	NA	asparagine synthetase (glutamine-hydrolyzing) [Source:HGNC Symbol;Acc:HGNC:753]	ENST00000641784	0	chr7	97851688	97972985	MSTRG.30144	AC079781	yes	known	cis	100K	NA	0.382366
MSTRG.30144.12	j	chr7	97852314	97872408	MSTRG.30144	AC079781	yes	NA	NA	NA	NA	NA	ENST00000641784	0	chr7	97851688	97972985	MSTRG.30144	AC079781	yes	known	cis	1K	NA	0.391734
ENST00000487714	0	chr7	97852314	97854875	MSTRG.30144	ASNS	yes	GO:0000166(nucleotide binding);GO:0001889(liver development);GO:0004066(asparagine synthase (glutamine-hydrolyzing) activity);GO:0005515(protein binding);GO:0005524(ATP binding);GO:0005829(cytosol);GO:0006520(cellular amino acid metabolic process);GO:0006529(asparagine biosynthetic process);GO:0006541(glutamine metabolic process);GO:0008652(cellular amino acid biosynthetic process);GO:0009416(res…	00250(Alanine, aspartate and glutamate metabolism)	NA	NA	asparagine synthetase (glutamine-hydrolyzing) [Source:HGNC Symbol;Acc:HGNC:753]	ENST00000641784	0	chr7	97851688	97972985	MSTRG.30144	AC079781	yes	known	cis	1K	NA	0.299674
ENST00000641784	0	chr7	97851688	97972985	MSTRG.30144	AC079781	yes	NA	NA	NA	NA	novel transcript	ENST00000641784	0	chr7	97851688	97972985	MSTRG.30144	AC079781	yes	known	cis	1K	NA	1
ENST00000414884	0	chr7	97869072	97872158	MSTRG.30144	ASNS	yes	GO:0000166(nucleotide binding);GO:0001889(liver development);GO:0004066(asparagine synthase (glutamine-hydrolyzing) activity);GO:0005515(protein binding);GO:0005524(ATP binding);GO:0005829(cytosol);GO:0006520(cellular amino acid metabolic process);GO:0006529(asparagine biosynthetic process);GO:0006541(glutamine metabolic process);GO:0008652(cellular amino acid biosynthetic process);GO:0009416(res…	00250(Alanine, aspartate and glutamate metabolism)	NA	NA	asparagine synthetase (glutamine-hydrolyzing) [Source:HGNC Symbol;Acc:HGNC:753]	ENST00000641784	0	chr7	97851688	97972985	MSTRG.30144	AC079781	yes	known	cis	100K	NA	0.972352
ENST00000175506	0	chr7	97852118	97872542	MSTRG.30144	ASNS	yes	GO:0000166(nucleotide binding);GO:0001889(liver development);GO:0004066(asparagine synthase (glutamine-hydrolyzing) activity);GO:0005515(protein binding);GO:0005524(ATP binding);GO:0005829(cytosol);GO:0006520(cellular amino acid metabolic process);GO:0006529(asparagine biosynthetic process);GO:0006541(glutamine metabolic process);GO:0008652(cellular amino acid biosynthetic process);GO:0009416(res…	00250(Alanine, aspartate and glutamate metabolism)	NA	NA	asparagine synthetase (glutamine-hydrolyzing) [Source:HGNC Symbol;Acc:HGNC:753]	ENST00000641784	0	chr7	97851688	97972985	MSTRG.30144	AC079781	yes	known	cis	1K	NA	0.359713
ENST00000558314	0	chr15	63042751	63061265	MSTRG.11020	TPM1	yes	GO:0001701(in utero embryonic development);GO:0001725(stress fiber);GO:0003065(positive regulation of heart rate by epinephrine);GO:0003779(actin binding);GO:0005200(structural constituent of cytoskeleton);GO:0005515(protein binding);GO:0005737(cytoplasm);GO:0005829(cytosol);GO:0005856(cytoskeleton);GO:0005862(muscle thin filament tropomyosin);GO:0005884(actin filament);GO:0006936(muscle contract…	04260(Cardiac muscle contraction);04261(Adrenergic signaling in cardiomyocytes);05206(MicroRNAs in cancer);05410(Hypertrophic cardiomyopathy (HCM));05414(Dilated cardiomyopathy (DCM))	K10373	NA	tropomyosin 1 [Source:HGNC Symbol;Acc:HGNC:12010]	ENST00000561241	0	chr15	63046034	63049387	MSTRG.11021	TPM1-AS	yes	known	cis	10K	NA	0.867008
ENST00000558264	0	chr15	63055729	63071912	MSTRG.11020	TPM1	yes	GO:0001701(in utero embryonic development);GO:0001725(stress fiber);GO:0003065(positive regulation of heart rate by epinephrine);GO:0003779(actin binding);GO:0005200(structural constituent of cytoskeleton);GO:0005515(protein binding);GO:0005737(cytoplasm);GO:0005829(cytosol);GO:0005856(cytoskeleton);GO:0005862(muscle thin filament tropomyosin);GO:0005884(actin filament);GO:0006936(muscle contract…	04260(Cardiac muscle contraction);04261(Adrenergic signaling in cardiomyocytes);05206(MicroRNAs in cancer);05410(Hypertrophic cardiomyopathy (HCM));05414(Dilated cardiomyopathy (DCM))	K10373	NA	tropomyosin 1 [Source:HGNC Symbol;Acc:HGNC:12010]	ENST00000561241	0	chr15	63046034	63049387	MSTRG.11021	TPM1-AS	yes	known	cis	10K	NA	0.883363
ENST00000561241	0	chr15	63046034	63049387	MSTRG.11021	TPM1-AS	yes	NA	NA	NA	NA	TPM1 antisense RNA [Source:HGNC Symbol;Acc:HGNC:53635]	ENST00000561241	0	chr15	63046034	63049387	MSTRG.11021	TPM1-AS	yes	known	cis	1K	NA	1
ENST00000610733	0	chr15	63042687	63047726	MSTRG.11020	TPM1	yes	GO:0001701(in utero embryonic development);GO:0001725(stress fiber);GO:0003065(positive regulation of heart rate by epinephrine);GO:0003779(actin binding);GO:0005200(structural constituent of cytoskeleton);GO:0005515(protein binding);GO:0005737(cytoplasm);GO:0005829(cytosol);GO:0005856(cytoskeleton);GO:0005862(muscle thin filament tropomyosin);GO:0005884(actin filament);GO:0006936(muscle contract…	04260(Cardiac muscle contraction);04261(Adrenergic signaling in cardiomyocytes);05206(MicroRNAs in cancer);05410(Hypertrophic cardiomyopathy (HCM));05414(Dilated cardiomyopathy (DCM))	K10373	NA	tropomyosin 1 [Source:HGNC Symbol;Acc:HGNC:12010]	ENST00000561241	0	chr15	63046034	63049387	MSTRG.11021	TPM1-AS	yes	known	cis	10K	NA	0.921022
ENST00000603791	0	chr6	3751111	3753871	MSTRG.27414	AL391422	yes	NA	NA	NA	NA	novel transcript, antisense to PXDC1	ENST00000603791	0	chr6	3751111	3753871	MSTRG.27414	AL391422	yes	known	cis	1K	NA	1
ENST00000499962	0	chr11	3029394	3041260	MSTRG.4785	CARS-AS1	yes	NA	NA	NA	NA	CARS antisense RNA 1 [Source:HGNC Symbol;Acc:HGNC:40125]	ENST00000499962	0	chr11	3029394	3041260	MSTRG.4785	CARS-AS1	yes	known	cis	1K	NA	1
MSTRG.24911.12	j	chr4	89681523	89694119	MSTRG.24911	AC097478	yes	NA	NA	NA	NA	NA	ENST00000612706	0	chr4	89681523	89686704	MSTRG.24911	AC097478	yes	known	cis	1K	NA	-0.521519
ENST00000612706	0	chr4	89681523	89686704	MSTRG.24911	AC097478	yes	NA	NA	NA	NA	novel transcript	ENST00000612706	0	chr4	89681523	89686704	MSTRG.24911	AC097478	yes	known	cis	1K	NA	1
ENST00000521028	0	chr7	27201844	27207259	MSTRG.29511	HOTTIP	yes	NA	NA	NA	NA	HOXA distal transcript antisense RNA [Source:HGNC Symbol;Acc:HGNC:37461]	ENST00000521028	0	chr7	27201844	27207259	MSTRG.29511	HOTTIP	yes	known	cis	1K	NA	1
ENST00000533920	0	chr11	567144	568457	MSTRG.4717	MIR210HG	yes	NA	NA	NA	NA	MIR210 host gene [Source:HGNC Symbol;Acc:HGNC:39524]	ENST00000533920	0	chr11	567144	568457	MSTRG.4717	MIR210HG	yes	known	cis	1K	NA	1
MSTRG.25230.6	j	chr4	128428070	128507536	MSTRG.25230	LINC02615	yes	NA	NA	NA	NA	NA	ENST00000511497	0	chr4	128428070	128519394	MSTRG.25230	LINC02615	yes	known	cis	1K	NA	0.479752
MSTRG.25230.8	j	chr4	128428070	128523184	MSTRG.25230	LINC02615	yes	NA	NA	NA	NA	NA	ENST00000511497	0	chr4	128428070	128519394	MSTRG.25230	LINC02615	yes	known	cis	1K	NA	0.536196
MSTRG.25230.9	j	chr4	128428070	128525199	MSTRG.25230	LINC02615	yes	NA	NA	NA	NA	NA	ENST00000511497	0	chr4	128428070	128519394	MSTRG.25230	LINC02615	yes	known	cis	1K	NA	0.793105
MSTRG.25230.10	j	chr4	128428070	128435329	MSTRG.25230	LINC02615	yes	NA	NA	NA	NA	NA	ENST00000511497	0	chr4	128428070	128519394	MSTRG.25230	LINC02615	yes	known	cis	1K	NA	0.874165
MSTRG.25235.1	u	chr4	128526440	128529712	MSTRG.25235	.	yes	NA	NA	NA	NA	NA	ENST00000511497	0	chr4	128428070	128519394	MSTRG.25230	LINC02615	yes	known	cis	100K	NA	0.616774
ENST00000511497	0	chr4	128428070	128519394	MSTRG.25230	LINC02615	yes	NA	NA	NA	NA	long intergenic non-protein coding RNA 2615 [Source:HGNC Symbol;Acc:HGNC:53402]	ENST00000511497	0	chr4	128428070	128519394	MSTRG.25230	LINC02615	yes	known	cis	1K	NA	1
ENST00000586954	0	chr19	27775757	27793371	MSTRG.16967	LINC00662	yes	NA	NA	NA	NA	long intergenic non-protein coding RNA 662 [Source:HGNC Symbol;Acc:HGNC:27122]	ENST00000586954	0	chr19	27775757	27793371	MSTRG.16967	LINC00662	yes	known	cis	1K	NA	1
ENST00000562493	0	chr19	27757184	27760849	MSTRG.16968	AC006504	yes	NA	NA	NA	NA	novel transcript	ENST00000586954	0	chr19	27775757	27793371	MSTRG.16967	LINC00662	yes	known	cis	100K	NA	0.93919
MSTRG.16969.1	i	chr19	27774918	27775748	MSTRG.16969	LINC00662	yes	NA	NA	NA	NA	NA	ENST00000586954	0	chr19	27775757	27793371	MSTRG.16967	LINC00662	yes	known	cis	1K	NA	0.85074
ENST00000377469	0	chr2	74928239	74933024	MSTRG.18597	LINC01291	yes	NA	NA	NA	NA	long intergenic non-protein coding RNA 1291 [Source:HGNC Symbol;Acc:HGNC:50358]	ENST00000377469	0	chr2	74928239	74933024	MSTRG.18597	LINC01291	yes	known	cis	1K	NA	1
ENST00000555082	0	chr14	61322664	61550976	MSTRG.9706	PRKCH	yes	GO:0000166(nucleotide binding);GO:0004672(protein kinase activity);GO:0004674(protein serine/threonine kinase activity);GO:0004697(protein kinase C activity);GO:0005515(protein binding);GO:0005524(ATP binding);GO:0005737(cytoplasm);GO:0005829(cytosol);GO:0005886(plasma membrane);GO:0006468(protein phosphorylation);GO:0007165(signal transduction);GO:0010744(positive regulation of macrophage derive…	04270(Vascular smooth muscle contraction);04750(Inflammatory mediator regulation of TRP channels)	NA	NA	protein kinase C eta [Source:HGNC Symbol;Acc:HGNC:9403]	ENST00000500036	0	chr14	61303021	61322818	MSTRG.9708	AL359220	yes	known	cis	100K	NA	0.651425
ENST00000500036	0	chr14	61303021	61322818	MSTRG.9708	AL359220	yes	NA	NA	NA	NA	novel transcript, antisense to PRKCH	ENST00000500036	0	chr14	61303021	61322818	MSTRG.9708	AL359220	yes	known	cis	1K	NA	1
ENST00000586061	0	chr19	782796	785080	MSTRG.16144	LINC01836	yes	NA	NA	NA	NA	long intergenic non-protein coding RNA 1836 [Source:HGNC Symbol;Acc:HGNC:52652]	ENST00000586061	0	chr19	782796	785080	MSTRG.16144	LINC01836	yes	known	cis	1K	NA	1
ENST00000436786	0	chr9	22646200	22824213	MSTRG.32368	LINC01239	yes	NA	NA	NA	NA	long intergenic non-protein coding RNA 1239 [Source:HGNC Symbol;Acc:HGNC:49796]	ENST00000436786	0	chr9	22646200	22824213	MSTRG.32368	LINC01239	yes	known	cis	1K	NA	1
ENST00000393576	0	chr5	177426794	177442901	MSTRG.27242	GRK6	yes	GO:0000166(nucleotide binding);GO:0004672(protein kinase activity);GO:0004674(protein serine/threonine kinase activity);GO:0004703(G protein-coupled receptor kinase activity);GO:0005515(protein binding);GO:0005524(ATP binding);GO:0005886(plasma membrane);GO:0006468(protein phosphorylation);GO:0007165(signal transduction);GO:0007186(G protein-coupled receptor signaling pathway);GO:0008277(regulati…	04062(Chemokine signaling pathway);04144(Endocytosis);05032(Morphine addiction)	NA	NA	G protein-coupled receptor kinase 6 [Source:HGNC Symbol;Acc:HGNC:4545]	ENST00000623593	0	chr5	177476631	177479656	ENSG00000279821	AC145098	yes	known	cis	100K	NA	-0.720972
ENST00000510163	0	chr5	177519791	177536390	MSTRG.27251	FAM193B	yes	GO:0005634(nucleus);GO:0005654(nucleoplasm);GO:0005730(nucleolus);GO:0005737(cytoplasm)	NA	NA	NA	family with sequence similarity 193 member B [Source:HGNC Symbol;Acc:HGNC:25524]	ENST00000623593	0	chr5	177476631	177479656	ENSG00000279821	AC145098	yes	known	cis	100K	NA	0.581985
MSTRG.27251.12	j	chr5	177519792	177554481	MSTRG.27251	FAM193B	yes	NA	NA	NA	NA	NA	ENST00000623593	0	chr5	177476631	177479656	ENSG00000279821	AC145098	yes	known	cis	100K	NA	0.405519
ENST00000510492	0	chr5	177448334	177456268	MSTRG.27244	PRR7	yes	GO:0002250(adaptive immune response);GO:0002376(immune system process);GO:0005515(protein binding);GO:0005634(nucleus);GO:0005737(cytoplasm);GO:0005886(plasma membrane);GO:0010942(positive regulation of cell death);GO:0014069(postsynaptic density);GO:0016020(membrane);GO:0016021(integral component of membrane);GO:0030054(cell junction);GO:0030217(T cell differentiation);GO:0030425(dendrite);GO:00…	NA	NA	NA	proline rich 7, synaptic [Source:HGNC Symbol;Acc:HGNC:28130]	ENST00000623593	0	chr5	177476631	177479656	ENSG00000279821	AC145098	yes	known	cis	100K	NA	-0.608694
ENST00000623593	0	chr5	177476631	177479656	ENSG00000279821	AC145098	yes	NA	NA	NA	NA	TEC	ENST00000623593	0	chr5	177476631	177479656	ENSG00000279821	AC145098	yes	known	cis	1K	NA	1
MSTRG.27246.1	j	chr5	177483394	177497561	MSTRG.27246	PDLIM7	yes	NA	NA	NA	NA	NA	ENST00000623593	0	chr5	177476631	177479656	ENSG00000279821	AC145098	yes	known	cis	10K	NA	0.631031
ENST00000503346	0	chr5	177491073	177492970	MSTRG.27246	PDLIM7	yes	GO:0001503(ossification);GO:0001725(stress fiber);GO:0001726(ruffle);GO:0005515(protein binding);GO:0005634(nucleus);GO:0005737(cytoplasm);GO:0005829(cytosol);GO:0005856(cytoskeleton);GO:0005913(cell-cell adherens junction);GO:0005925(focal adhesion);GO:0006898(receptor-mediated endocytosis);GO:0007275(multicellular organism development);GO:0007411(axon guidance);GO:0015629(actin cytoskeleton);GO…	NA	NA	NA	PDZ and LIM domain 7 [Source:HGNC Symbol;Acc:HGNC:22958]	ENST00000623593	0	chr5	177476631	177479656	ENSG00000279821	AC145098	yes	known	cis	100K	NA	0.761591
ENST00000625186	0	chr12	24902309	24904681	MSTRG.6909	AC026310	yes	NA	NA	NA	NA	novel transcript	ENST00000625186	0	chr12	24902309	24904681	MSTRG.6909	AC026310	yes	known	cis	1K	NA	1
MSTRG.7967.18	j	chr12	104287057	104348583	MSTRG.7967	TXNRD1	yes	NA	NA	NA	NA	NA	ENST00000549807	0	chr12	104262314	104280722	MSTRG.7968	AC089983	yes	known	cis	100K	NA	0.617855
ENST00000526390	0	chr12	104286990	104350274	MSTRG.7967	TXNRD1	yes	GO:0001650(fibrillar center);GO:0001707(mesoderm formation);GO:0001887(selenium compound metabolic process);GO:0004791(thioredoxin-disulfide reductase activity);GO:0005515(protein binding);GO:0005623(cell);GO:0005634(nucleus);GO:0005654(nucleoplasm);GO:0005737(cytoplasm);GO:0005739(mitochondrion);GO:0005829(cytosol);GO:0007165(signal transduction);GO:0007369(gastrulation);GO:0008283(cell populati…	00450(Selenocompound metabolism);05200(Pathways in cancer);05225(Hepatocellular carcinoma)	K22182	EC:1.8.1.9	thioredoxin reductase 1 [Source:HGNC Symbol;Acc:HGNC:12437]	ENST00000549807	0	chr12	104262314	104280722	MSTRG.7968	AC089983	yes	known	cis	100K	NA	0.654625
ENST00000388854	0	chr12	104286682	104350305	MSTRG.7967	TXNRD1	yes	GO:0001650(fibrillar center);GO:0001707(mesoderm formation);GO:0001887(selenium compound metabolic process);GO:0004791(thioredoxin-disulfide reductase activity);GO:0005515(protein binding);GO:0005623(cell);GO:0005634(nucleus);GO:0005654(nucleoplasm);GO:0005737(cytoplasm);GO:0005739(mitochondrion);GO:0005829(cytosol);GO:0007165(signal transduction);GO:0007369(gastrulation);GO:0008283(cell populati…	00450(Selenocompound metabolism);05200(Pathways in cancer);05225(Hepatocellular carcinoma)	K22182	EC:1.8.1.9	thioredoxin reductase 1 [Source:HGNC Symbol;Acc:HGNC:12437]	ENST00000549807	0	chr12	104262314	104280722	MSTRG.7968	AC089983	yes	known	cis	100K	NA	0.617511
ENST00000549807	0	chr12	104262314	104280722	MSTRG.7968	AC089983	yes	NA	NA	NA	NA	novel transcript, antisense to TXNRD1	ENST00000549807	0	chr12	104262314	104280722	MSTRG.7968	AC089983	yes	known	cis	1K	NA	1
MSTRG.31455.3	j	chr8	73008877	73046413	MSTRG.31455	TERF1	yes	NA	NA	NA	NA	NA	ENST00000442274	0	chr8	73083787	73085879	MSTRG.31460	AC100823	yes	known	cis	100K	NA	-0.393755
ENST00000442274	0	chr8	73083787	73085879	MSTRG.31460	AC100823	yes	NA	NA	NA	NA	novel transcript	ENST00000442274	0	chr8	73083787	73085879	MSTRG.31460	AC100823	yes	known	cis	1K	NA	1
ENST00000448323	0	chr4	82818662	82891266	MSTRG.24866	SEC31A	yes	GO:0000139(Golgi membrane);GO:0002474(antigen processing and presentation of peptide antigen via MHC class I);GO:0005198(structural molecule activity);GO:0005515(protein binding);GO:0005737(cytoplasm);GO:0005783(endoplasmic reticulum);GO:0005789(endoplasmic reticulum membrane);GO:0005829(cytosol);GO:0006886(intracellular protein transport);GO:0006888(endoplasmic reticulum to Golgi vesicle-mediate…	04141(Protein processing in endoplasmic reticulum)	K14005	NA	SEC31 homolog A, COPII coat complex component [Source:HGNC Symbol;Acc:HGNC:17052]	ENST00000504520	0	chr4	82893009	82900960	MSTRG.24866	THAP9-AS1	yes	known	cis	100K	NA	0.0859742
ENST00000436790	0	chr4	82863211	82891184	MSTRG.24866	SEC31A	yes	GO:0000139(Golgi membrane);GO:0002474(antigen processing and presentation of peptide antigen via MHC class I);GO:0005198(structural molecule activity);GO:0005515(protein binding);GO:0005737(cytoplasm);GO:0005783(endoplasmic reticulum);GO:0005789(endoplasmic reticulum membrane);GO:0005829(cytosol);GO:0006886(intracellular protein transport);GO:0006888(endoplasmic reticulum to Golgi vesicle-mediate…	04141(Protein processing in endoplasmic reticulum)	K14005	NA	SEC31 homolog A, COPII coat complex component [Source:HGNC Symbol;Acc:HGNC:17052]	ENST00000504520	0	chr4	82893009	82900960	MSTRG.24866	THAP9-AS1	yes	known	cis	100K	NA	0.904107
ENST00000504520	0	chr4	82893009	82900960	MSTRG.24866	THAP9-AS1	yes	NA	NA	NA	NA	THAP9 antisense RNA 1 [Source:HGNC Symbol;Acc:HGNC:44172]	ENST00000504520	0	chr4	82893009	82900960	MSTRG.24866	THAP9-AS1	yes	known	cis	1K	NA	1
ENST00000505472	0	chr4	82818672	82881937	MSTRG.24866	SEC31A	yes	GO:0000139(Golgi membrane);GO:0002474(antigen processing and presentation of peptide antigen via MHC class I);GO:0005198(structural molecule activity);GO:0005515(protein binding);GO:0005737(cytoplasm);GO:0005783(endoplasmic reticulum);GO:0005789(endoplasmic reticulum membrane);GO:0005829(cytosol);GO:0006886(intracellular protein transport);GO:0006888(endoplasmic reticulum to Golgi vesicle-mediate…	04141(Protein processing in endoplasmic reticulum)	K14005	NA	SEC31 homolog A, COPII coat complex component [Source:HGNC Symbol;Acc:HGNC:17052]	ENST00000504520	0	chr4	82893009	82900960	MSTRG.24866	THAP9-AS1	yes	known	cis	100K	NA	-0.491145
ENST00000500777	0	chr4	82818672	82881940	MSTRG.24866	SEC31A	yes	GO:0000139(Golgi membrane);GO:0002474(antigen processing and presentation of peptide antigen via MHC class I);GO:0005198(structural molecule activity);GO:0005515(protein binding);GO:0005737(cytoplasm);GO:0005783(endoplasmic reticulum);GO:0005789(endoplasmic reticulum membrane);GO:0005829(cytosol);GO:0006886(intracellular protein transport);GO:0006888(endoplasmic reticulum to Golgi vesicle-mediate…	04141(Protein processing in endoplasmic reticulum)	K14005	NA	SEC31 homolog A, COPII coat complex component [Source:HGNC Symbol;Acc:HGNC:17052]	ENST00000504520	0	chr4	82893009	82900960	MSTRG.24866	THAP9-AS1	yes	known	cis	100K	NA	0.147486
ENST00000491231	0	chr11	62806937	62832042	MSTRG.5452	STX5	yes	GO:0000139(Golgi membrane);GO:0000149(SNARE binding);GO:0005484(SNAP receptor activity);GO:0005515(protein binding);GO:0005783(endoplasmic reticulum);GO:0005789(endoplasmic reticulum membrane);GO:0005794(Golgi apparatus);GO:0005829(cytosol);GO:0006886(intracellular protein transport);GO:0006888(endoplasmic reticulum to Golgi vesicle-mediated transport);GO:0006906(vesicle fusion);GO:0012505(endome…	04130(SNARE interactions in vesicular transport)	K08490	NA	syntaxin 5 [Source:HGNC Symbol;Acc:HGNC:11440]	ENST00000539921	0	chr11	62851988	62855236	MSTRG.5465	SNHG1	yes	known	cis	100K	NA	-0.437415
ENST00000540725	0	chr11	62851988	62855746	MSTRG.5465	SNHG1	yes	NA	NA	NA	NA	small nucleolar RNA host gene 1 [Source:HGNC Symbol;Acc:HGNC:32688]	ENST00000539921	0	chr11	62851988	62855236	MSTRG.5465	SNHG1	yes	known	cis	1K	NA	0.986055
ENST00000537869	0	chr11	62851991	62855460	MSTRG.5465	SNHG1	yes	NA	NA	NA	NA	small nucleolar RNA host gene 1 [Source:HGNC Symbol;Acc:HGNC:32688]	ENST00000539921	0	chr11	62851988	62855236	MSTRG.5465	SNHG1	yes	known	cis	1K	NA	0.880542
ENST00000457660	0	chr11	62881805	62886526	MSTRG.5466	SLC3A2	yes	GO:0003723(RNA binding);GO:0003725(double-stranded RNA binding);GO:0003824(catalytic activity);GO:0005432(calcium:sodium antiporter activity);GO:0005515(protein binding);GO:0005634(nucleus);GO:0005829(cytosol);GO:0005886(plasma membrane);GO:0005975(carbohydrate metabolic process);GO:0006816(calcium ion transport);GO:0006865(amino acid transport);GO:0009986(cell surface);GO:0015175(neutral amino a…	04150(mTOR signaling pathway);04216(Ferroptosis);04974(Protein digestion and absorption)	K06519	NA	solute carrier family 3 member 2 [Source:HGNC Symbol;Acc:HGNC:11026]	ENST00000539921	0	chr11	62851988	62855236	MSTRG.5465	SNHG1	yes	known	cis	100K	NA	0.612284
ENST00000338663	0	chr11	62880872	62888855	MSTRG.5466	SLC3A2	yes	GO:0003723(RNA binding);GO:0003725(double-stranded RNA binding);GO:0003824(catalytic activity);GO:0005432(calcium:sodium antiporter activity);GO:0005515(protein binding);GO:0005634(nucleus);GO:0005829(cytosol);GO:0005886(plasma membrane);GO:0005975(carbohydrate metabolic process);GO:0006816(calcium ion transport);GO:0006865(amino acid transport);GO:0009986(cell surface);GO:0015175(neutral amino a…	04150(mTOR signaling pathway);04216(Ferroptosis);04974(Protein digestion and absorption)	K06519	NA	solute carrier family 3 member 2 [Source:HGNC Symbol;Acc:HGNC:11026]	ENST00000539921	0	chr11	62851988	62855236	MSTRG.5465	SNHG1	yes	known	cis	100K	NA	0.723085
ENST00000539921	0	chr11	62851988	62855236	MSTRG.5465	SNHG1	yes	NA	NA	NA	NA	small nucleolar RNA host gene 1 [Source:HGNC Symbol;Acc:HGNC:32688]	ENST00000539921	0	chr11	62851988	62855236	MSTRG.5465	SNHG1	yes	known	cis	1K	NA	1
ENST00000538682	0	chr11	62881709	62888455	MSTRG.5466	SLC3A2	yes	GO:0003723(RNA binding);GO:0003725(double-stranded RNA binding);GO:0003824(catalytic activity);GO:0005432(calcium:sodium antiporter activity);GO:0005515(protein binding);GO:0005634(nucleus);GO:0005829(cytosol);GO:0005886(plasma membrane);GO:0005975(carbohydrate metabolic process);GO:0006816(calcium ion transport);GO:0006865(amino acid transport);GO:0009986(cell surface);GO:0015175(neutral amino a…	04150(mTOR signaling pathway);04216(Ferroptosis);04974(Protein digestion and absorption)	K06519	NA	solute carrier family 3 member 2 [Source:HGNC Symbol;Acc:HGNC:11026]	ENST00000539921	0	chr11	62851988	62855236	MSTRG.5465	SNHG1	yes	known	cis	100K	NA	0.850585
ENST00000448463	0	chr21	14027451	14089046	MSTRG.21076	AP001347	yes	NA	NA	NA	NA	novel transcript, antisense to LIPI	ENST00000448463	0	chr21	14027451	14089046	MSTRG.21076	AP001347	yes	known	cis	1K	NA	1
ENST00000356215	0	chr12	65855947	65882041	MSTRG.7613	HMGA2-AS1	yes	NA	NA	NA	NA	HMGA2 antisense RNA 1 [Source:HGNC Symbol;Acc:HGNC:53973]	ENST00000356215	0	chr12	65855947	65882041	MSTRG.7613	HMGA2-AS1	yes	known	cis	1K	NA	1
ENST00000375398	0	chr10	29457348	29634972	MSTRG.3624	SVIL	yes	GO:0002102(podosome);GO:0003779(actin binding);GO:0005515(protein binding);GO:0005634(nucleus);GO:0005737(cytoplasm);GO:0005829(cytosol);GO:0005856(cytoskeleton);GO:0005886(plasma membrane);GO:0005925(focal adhesion);GO:0007010(cytoskeleton organization);GO:0007519(skeletal muscle tissue development);GO:0015629(actin cytoskeleton);GO:0016020(membrane);GO:0030054(cell junction);GO:0030496(midbody)…	NA	K10369	NA	supervillin [Source:HGNC Symbol;Acc:HGNC:11480]	ENST00000427063	0	chr10	29409572	29422372	MSTRG.3621	SVIL-AS1	yes	known	cis	100K	NA	-0.152368
ENST00000427063	0	chr10	29409572	29422372	MSTRG.3621	SVIL-AS1	yes	NA	NA	NA	NA	SVIL antisense RNA 1 [Source:HGNC Symbol;Acc:HGNC:51219]	ENST00000427063	0	chr10	29409572	29422372	MSTRG.3621	SVIL-AS1	yes	known	cis	1K	NA	1
ENST00000423008	0	chr7	1160374	1165267	MSTRG.29247	AC091729	yes	NA	NA	NA	NA	novel transcript	ENST00000423008	0	chr7	1160374	1165267	MSTRG.29247	AC091729	yes	known	cis	1K	NA	1
MSTRG.27601.14	j	chr6	22113306	22194893	MSTRG.27601	CASC15	yes	NA	NA	NA	NA	NA	ENST00000605917	0	chr6	22147208	22151668	MSTRG.27601	CASC15	yes	known	cis	100K	NA	0.924937
ENST00000605917	0	chr6	22147208	22151668	MSTRG.27601	CASC15	yes	NA	NA	NA	NA	cancer susceptibility 15 [Source:HGNC Symbol;Acc:HGNC:28245]	ENST00000605917	0	chr6	22147208	22151668	MSTRG.27601	CASC15	yes	known	cis	1K	NA	1
ENST00000434222	0	chr7	134442386	134459102	MSTRG.30606	AKR1B1	yes	GO:0001523(retinoid metabolic process);GO:0001758(retinal dehydrogenase activity);GO:0001894(tissue homeostasis);GO:0003091(renal water homeostasis);GO:0004032(alditol:NADP+ 1-oxidoreductase activity);GO:0005615(extracellular space);GO:0005654(nucleoplasm);GO:0005737(cytoplasm);GO:0005829(cytosol);GO:0005975(carbohydrate metabolic process);GO:0005996(monosaccharide metabolic process);GO:0006061(s…	00040(Pentose and glucuronate interconversions);00051(Fructose and mannose metabolism);00052(Galactose metabolism);00561(Glycerolipid metabolism);00790(Folate biosynthesis)	NA	NA	aldo-keto reductase family 1 member B [Source:HGNC Symbol;Acc:HGNC:381]	ENST00000609619	0	chr7	134418471	134432453	MSTRG.30582	AC009275	yes	known	cis	100K	NA	0.508852
MSTRG.30606.6	j	chr7	134447956	134459100	MSTRG.30606	AKR1B1	yes	NA	NA	NA	NA	NA	ENST00000609619	0	chr7	134418471	134432453	MSTRG.30582	AC009275	yes	known	cis	100K	NA	0.867294
ENST00000467251	0	chr7	134444727	134448024	MSTRG.30606	AKR1B1	yes	GO:0001523(retinoid metabolic process);GO:0001758(retinal dehydrogenase activity);GO:0001894(tissue homeostasis);GO:0003091(renal water homeostasis);GO:0004032(alditol:NADP+ 1-oxidoreductase activity);GO:0005615(extracellular space);GO:0005654(nucleoplasm);GO:0005737(cytoplasm);GO:0005829(cytosol);GO:0005975(carbohydrate metabolic process);GO:0005996(monosaccharide metabolic process);GO:0006061(s…	00040(Pentose and glucuronate interconversions);00051(Fructose and mannose metabolism);00052(Galactose metabolism);00561(Glycerolipid metabolism);00790(Folate biosynthesis)	NA	NA	aldo-keto reductase family 1 member B [Source:HGNC Symbol;Acc:HGNC:381]	ENST00000609619	0	chr7	134418471	134432453	MSTRG.30582	AC009275	yes	known	cis	100K	NA	0.965662
ENST00000609619	0	chr7	134418471	134432453	MSTRG.30582	AC009275	yes	NA	NA	NA	NA	novel transcript	ENST00000609619	0	chr7	134418471	134432453	MSTRG.30582	AC009275	yes	known	cis	1K	NA	1
ENST00000491741	0	chr7	134449058	134459284	MSTRG.30606	AKR1B1	yes	GO:0001523(retinoid metabolic process);GO:0001758(retinal dehydrogenase activity);GO:0001894(tissue homeostasis);GO:0003091(renal water homeostasis);GO:0004032(alditol:NADP+ 1-oxidoreductase activity);GO:0005615(extracellular space);GO:0005654(nucleoplasm);GO:0005737(cytoplasm);GO:0005829(cytosol);GO:0005975(carbohydrate metabolic process);GO:0005996(monosaccharide metabolic process);GO:0006061(s…	00040(Pentose and glucuronate interconversions);00051(Fructose and mannose metabolism);00052(Galactose metabolism);00561(Glycerolipid metabolism);00790(Folate biosynthesis)	NA	NA	aldo-keto reductase family 1 member B [Source:HGNC Symbol;Acc:HGNC:381]	ENST00000609619	0	chr7	134418471	134432453	MSTRG.30582	AC009275	yes	known	cis	100K	NA	0.879782
MSTRG.20680.3	j	chr20	44619579	44651661	MSTRG.20680	ADA	yes	NA	NA	NA	NA	NA	ENST00000415889	0	chr20	44656451	44696096	MSTRG.20681	AL139352	yes	known	cis	100K	NA	0.59114
ENST00000415889	0	chr20	44656451	44696096	MSTRG.20681	AL139352	yes	NA	NA	NA	NA	novel transcript	ENST00000415889	0	chr20	44656451	44696096	MSTRG.20681	AL139352	yes	known	cis	1K	NA	1
ENST00000372874	0	chr20	44619522	44651699	MSTRG.20680	ADA	yes	GO:0001666(response to hypoxia);GO:0001701(in utero embryonic development);GO:0001821(histamine secretion);GO:0001829(trophectodermal cell differentiation);GO:0001883(purine nucleoside binding);GO:0001889(liver development);GO:0001890(placenta development);GO:0002314(germinal center B cell differentiation);GO:0002636(positive regulation of germinal center formation);GO:0002686(negative regulation…	00230(Purine metabolism);05340(Primary immunodeficiency)	NA	NA	adenosine deaminase [Source:HGNC Symbol;Acc:HGNC:186]	ENST00000415889	0	chr20	44656451	44696096	MSTRG.20681	AL139352	yes	known	cis	100K	NA	-0.898229
ENST00000586954	0	chr19	27775757	27793371	MSTRG.16967	LINC00662	yes	NA	NA	NA	NA	long intergenic non-protein coding RNA 662 [Source:HGNC Symbol;Acc:HGNC:27122]	ENST00000562493	0	chr19	27757184	27760849	MSTRG.16968	AC006504	yes	known	cis	100K	NA	0.93919
ENST00000562493	0	chr19	27757184	27760849	MSTRG.16968	AC006504	yes	NA	NA	NA	NA	novel transcript	ENST00000562493	0	chr19	27757184	27760849	MSTRG.16968	AC006504	yes	known	cis	1K	NA	1
MSTRG.16969.1	i	chr19	27774918	27775748	MSTRG.16969	LINC00662	yes	NA	NA	NA	NA	NA	ENST00000562493	0	chr19	27757184	27760849	MSTRG.16968	AC006504	yes	known	cis	100K	NA	0.958755
ENST00000488015	0	chr7	88210555	88220038	MSTRG.30082	SRI	yes	GO:0001508(action potential);GO:0002020(protease binding);GO:0005102(signaling receptor binding);GO:0005246(calcium channel regulator activity);GO:0005509(calcium ion binding);GO:0005515(protein binding);GO:0005654(nucleoplasm);GO:0005737(cytoplasm);GO:0005739(mitochondrion);GO:0005789(endoplasmic reticulum membrane);GO:0005790(smooth endoplasmic reticulum);GO:0005829(cytosol);GO:0005886(plasma m…	NA	NA	NA	sorcin [Source:HGNC Symbol;Acc:HGNC:11292]	ENST00000631117	0	chr7	88279573	88304367	MSTRG.30084	AC003991	yes	known	cis	100K	NA	-0.587628
ENST00000414498	0	chr7	88281483	88306880	MSTRG.30085	STEAP4	yes	GO:0000139(Golgi membrane);GO:0005768(endosome);GO:0005794(Golgi apparatus);GO:0005886(plasma membrane);GO:0006811(ion transport);GO:0008823(cupric reductase activity);GO:0009055(electron transfer activity);GO:0015677(copper ion import);GO:0016020(membrane);GO:0016021(integral component of membrane);GO:0016491(oxidoreductase activity);GO:0020037(heme binding);GO:0022900(electron transport chain);…	NA	K19876	EC:1.16.1.-	STEAP4 metalloreductase [Source:HGNC Symbol;Acc:HGNC:21923]	ENST00000631117	0	chr7	88279573	88304367	MSTRG.30084	AC003991	yes	known	cis	10K	NA	0.963042
ENST00000631117	0	chr7	88279573	88304367	MSTRG.30084	AC003991	yes	NA	NA	NA	NA	novel transcript, antisense to STEAP4	ENST00000631117	0	chr7	88279573	88304367	MSTRG.30084	AC003991	yes	known	cis	1K	NA	1
ENST00000413670	0	chr1	98043352	98045458	MSTRG.1546	MIR137HG	yes	NA	NA	NA	NA	MIR137 host gene [Source:HGNC Symbol;Acc:HGNC:42871]	ENST00000413670	0	chr1	98043352	98045458	MSTRG.1546	MIR137HG	yes	known	cis	1K	NA	1
ENST00000445461	0	chr21	16194395	16607222	MSTRG.21125	MIR99AHG	yes	NA	NA	NA	NA	mir-99a-let-7c cluster host gene [Source:HGNC Symbol;Acc:HGNC:1274]	ENST00000445461	0	chr21	16194395	16607222	MSTRG.21125	MIR99AHG	yes	known	cis	1K	NA	1
MSTRG.2802.1	i	chr1	205448623	205449691	MSTRG.2802	LEMD1	yes	NA	NA	NA	NA	NA	ENST00000626538	0	chr1	205434885	205456746	MSTRG.2798	BLACAT1	yes	known	cis	100K	NA	0.881006
MSTRG.2799.1	i	chr1	205442032	205444326	MSTRG.2799	LEMD1	yes	NA	NA	NA	NA	NA	ENST00000626538	0	chr1	205434885	205456746	MSTRG.2798	BLACAT1	yes	known	cis	10K	NA	0.955169
ENST00000626538	0	chr1	205434885	205456746	MSTRG.2798	BLACAT1	yes	NA	NA	NA	NA	bladder cancer associated transcript 1 [Source:HGNC Symbol;Acc:HGNC:48597]	ENST00000626538	0	chr1	205434885	205456746	MSTRG.2798	BLACAT1	yes	known	cis	1K	NA	1
ENST00000432267	0	chr2	96239713	96242621	MSTRG.18746	STARD7-AS1	yes	NA	NA	NA	NA	STARD7 antisense RNA 1 [Source:HGNC Symbol;Acc:HGNC:40827]	ENST00000432267	0	chr2	96239713	96242621	MSTRG.18746	STARD7-AS1	yes	known	cis	1K	NA	1
ENST00000550468	0	chr12	49265156	49273306	MSTRG.7204	AC125611	yes	NA	NA	NA	NA	novel transcript, antisense to TUBA1C	ENST00000550468	0	chr12	49265156	49273306	MSTRG.7204	AC125611	yes	known	cis	1K	NA	1
MSTRG.3767.5	j	chr10	47914182	47929358	MSTRG.3767	NPY4R2	yes	NA	NA	NA	NA	NA	ENST00000610809	0	chr10	47985519	47991850	MSTRG.3766	AC245041	yes	known	cis	100K	NA	-0.361065
ENST00000610809	0	chr10	47985519	47991850	MSTRG.3766	AC245041	yes	NA	NA	NA	NA	novel transcript	ENST00000610809	0	chr10	47985519	47991850	MSTRG.3766	AC245041	yes	known	cis	1K	NA	1
ENST00000441570	0	chr6	71414961	71420267	MSTRG.28404	LINC00472	yes	NA	NA	NA	NA	long intergenic non-protein coding RNA 472 [Source:HGNC Symbol;Acc:HGNC:21380]	ENST00000441570	0	chr6	71414961	71420267	MSTRG.28404	LINC00472	yes	known	cis	1K	NA	1
ENST00000439725	0	chr11	1995176	1997460	MSTRG.4767	H19	yes	NA	NA	NA	NA	H19, imprinted maternally expressed transcript [Source:HGNC Symbol;Acc:HGNC:4713]	ENST00000436715	0	chr11	1995439	1996571	MSTRG.4767	H19	yes	known	cis	1K	NA	0.832569
ENST00000436715	0	chr11	1995439	1996571	MSTRG.4767	H19	yes	NA	NA	NA	NA	H19, imprinted maternally expressed transcript [Source:HGNC Symbol;Acc:HGNC:4713]	ENST00000436715	0	chr11	1995439	1996571	MSTRG.4767	H19	yes	known	cis	1K	NA	1
ENST00000647874	0	chr17	8072636	8087716	MSTRG.13582	ALOX12B	yes	GO:0003824(catalytic activity);GO:0004052(arachidonate 12-lipoxygenase activity);GO:0005506(iron ion binding);GO:0005515(protein binding);GO:0005737(cytoplasm);GO:0005829(cytosol);GO:0006497(protein lipidation);GO:0006629(lipid metabolic process);GO:0006631(fatty acid metabolic process);GO:0006665(sphingolipid metabolic process);GO:0010628(positive regulation of gene expression);GO:0016491(oxidor…	00590(Arachidonic acid metabolism);04726(Serotonergic synapse)	K08021	EC:1.13.11.-	arachidonate 12-lipoxygenase, 12R type [Source:HGNC Symbol;Acc:HGNC:430]	ENST00000399413	0	chr17	8079482	8081565	MSTRG.13583	AC129492	yes	known	cis	10K	NA	0.931421
ENST00000399413	0	chr17	8079482	8081565	MSTRG.13583	AC129492	yes	NA	NA	NA	NA	novel transcript, antisense to ALOX12B	ENST00000399413	0	chr17	8079482	8081565	MSTRG.13583	AC129492	yes	known	cis	1K	NA	1
ENST00000560539	0	chr15	69396904	69415029	MSTRG.11149	AC027237	yes	NA	NA	NA	NA	novel transcript, antisense to PAQR5	ENST00000560539	0	chr15	69396904	69415029	MSTRG.11149	AC027237	yes	known	cis	1K	NA	1
MSTRG.12416.2	o	chr16	29808630	29811206	MSTRG.12416	AC009133	yes	NA	NA	NA	NA	NA	ENST00000569981	0	chr16	29808636	29811985	MSTRG.12416	AC009133	yes	known	cis	1K	NA	-0.263088
MSTRG.12404.6	j	chr16	29871168	29895863	MSTRG.12404	SEZ6L2	yes	NA	NA	NA	NA	NA	ENST00000569981	0	chr16	29808636	29811985	MSTRG.12416	AC009133	yes	known	cis	100K	NA	-0.266474
MSTRG.12416.1	o	chr16	29807137	29811192	MSTRG.12416	AC009133	yes	NA	NA	NA	NA	NA	ENST00000569981	0	chr16	29808636	29811985	MSTRG.12416	AC009133	yes	known	cis	10K	NA	-0.11074
ENST00000308713	0	chr16	29871159	29899547	MSTRG.12404	SEZ6L2	yes	GO:0005783(endoplasmic reticulum);GO:0005789(endoplasmic reticulum membrane);GO:0005886(plasma membrane);GO:0008344(adult locomotory behavior);GO:0016020(membrane);GO:0016021(integral component of membrane);GO:0021680(cerebellar Purkinje cell layer development);GO:0043025(neuronal cell body);GO:0060074(synapse maturation);GO:0090036(regulation of protein kinase C signaling)	NA	NA	NA	seizure related 6 homolog like 2 [Source:HGNC Symbol;Acc:HGNC:30844]	ENST00000569981	0	chr16	29808636	29811985	MSTRG.12416	AC009133	yes	known	cis	100K	NA	-0.365287
ENST00000569981	0	chr16	29808636	29811985	MSTRG.12416	AC009133	yes	NA	NA	NA	NA	novel transcript, antisense to C16orf53 and MVP	ENST00000569981	0	chr16	29808636	29811985	MSTRG.12416	AC009133	yes	known	cis	1K	NA	1
ENST00000651957	0	chr1	149701104	149705716	MSTRG.1980	LINC00869	yes	NA	NA	NA	NA	long intergenic non-protein coding RNA 869 [Source:HGNC Symbol;Acc:HGNC:29050]	ENST00000620190	0	chr1	149607307	149647610	MSTRG.1980	LINC00869	yes	known	cis	100K	NA	0.579856
MSTRG.1983.1	i	chr1	149630902	149631956	MSTRG.1983	LINC00869	yes	NA	NA	NA	NA	NA	ENST00000620190	0	chr1	149607307	149647610	MSTRG.1980	LINC00869	yes	known	cis	100K	NA	0.781497
ENST00000620190	0	chr1	149607307	149647610	MSTRG.1980	LINC00869	yes	NA	NA	NA	NA	long intergenic non-protein coding RNA 869 [Source:HGNC Symbol;Acc:HGNC:29050]	ENST00000620190	0	chr1	149607307	149647610	MSTRG.1980	LINC00869	yes	known	cis	1K	NA	1
MSTRG.20999.6	j	chr21	6318495	6353283	MSTRG.20999	CU633906	yes	NA	NA	NA	NA	NA	ENST00000624576	0	chr21	6318434	6360415	MSTRG.20999	CU633906	yes	known	cis	1K	NA	0.292927
ENST00000624576	0	chr21	6318434	6360415	MSTRG.20999	CU633906	yes	NA	NA	NA	NA	novel transcript	ENST00000624576	0	chr21	6318434	6360415	MSTRG.20999	CU633906	yes	known	cis	1K	NA	1
MSTRG.27487.2	j	chr6	10412878	10416921	MSTRG.27487	TFAP2A-AS1	yes	NA	NA	NA	NA	NA	ENST00000496285	0	chr6	10429255	10434822	ENSG00000183674	LINC00518	yes	known	cis	100K	NA	-0.589279
ENST00000496285	0	chr6	10429255	10434822	ENSG00000183674	LINC00518	yes	NA	NA	NA	NA	long intergenic non-protein coding RNA 518 [Source:HGNC Symbol;Acc:HGNC:28626]	ENST00000496285	0	chr6	10429255	10434822	ENSG00000183674	LINC00518	yes	known	cis	1K	NA	1
MSTRG.10498.76	j	chr15	25085385	25120051	MSTRG.10498	SNHG14	yes	NA	NA	NA	NA	NA	ENST00000551938	0	chr15	25000314	25002404	MSTRG.10498	SNHG14	yes	known	cis	100K	NA	0.648578
MSTRG.10498.75	j	chr15	25085385	25120051	MSTRG.10498	SNHG14	yes	NA	NA	NA	NA	NA	ENST00000551938	0	chr15	25000314	25002404	MSTRG.10498	SNHG14	yes	known	cis	100K	NA	-0.402447
ENST00000551938	0	chr15	25000314	25002404	MSTRG.10498	SNHG14	yes	NA	NA	NA	NA	small nucleolar RNA host gene 14 [Source:HGNC Symbol;Acc:HGNC:37462]	ENST00000551938	0	chr15	25000314	25002404	MSTRG.10498	SNHG14	yes	known	cis	1K	NA	1
MSTRG.21023.9	o	chr21	9365226	9369304	MSTRG.21023	CR381653	yes	NA	NA	NA	NA	NA	MSTRG.21023.9	o	chr21	9365226	9369304	MSTRG.21023	CR381653	yes	novel	cis	1K	NA	1
MSTRG.21023.8	e	chr21	9365222	9373101	MSTRG.21023	CR381653	yes	NA	NA	NA	NA	NA	MSTRG.21023.9	o	chr21	9365226	9369304	MSTRG.21023	CR381653	yes	novel	cis	1K	NA	-0.83421
MSTRG.22494.5	j	chr3	28324306	28348824	MSTRG.22494	AZI2	yes	NA	NA	NA	NA	NA	MSTRG.22494.5	j	chr3	28324306	28348824	MSTRG.22494	AZI2	yes	novel	cis	1K	NA	1
MSTRG.3370.1	i	chr10	1558366	1560460	MSTRG.3370	ADARB2	yes	NA	NA	NA	NA	NA	MSTRG.3370.1	i	chr10	1558366	1560460	MSTRG.3370	ADARB2	yes	novel	cis	1K	NA	1
MSTRG.2033.10	j	chr1	148432959	148459757	MSTRG.2033	LINC01138	yes	NA	NA	NA	NA	NA	MSTRG.2033.10	j	chr1	148432959	148459757	MSTRG.2033	LINC01138	yes	novel	cis	1K	NA	1
MSTRG.2022.13	j	chr1	148532118	148679757	MSTRG.2022	NBPF14	yes	NA	NA	NA	NA	NA	MSTRG.2033.10	j	chr1	148432959	148459757	MSTRG.2033	LINC01138	yes	novel	cis	100K	NA	-0.384089
MSTRG.15118.2	u	chr17	74980954	74984870	MSTRG.15118	.	yes	NA	NA	NA	NA	NA	MSTRG.15118.2	u	chr17	74980954	74984870	MSTRG.15118	.	yes	novel	cis	1K	NA	1
ENST00000532395	0	chr17	74950743	74954972	MSTRG.15122	HID1	yes	GO:0000138(Golgi trans cisterna);GO:0000139(Golgi membrane);GO:0005515(protein binding);GO:0005737(cytoplasm);GO:0005794(Golgi apparatus);GO:0005797(Golgi medial cisterna);GO:0005829(cytosol);GO:0005881(cytoplasmic microtubule);GO:0006886(intracellular protein transport);GO:0016020(membrane);GO:0031001(response to brefeldin A);GO:0070062(extracellular exosome);GO:0090498(extrinsic component of Go…	NA	NA	NA	HID1 domain containing [Source:HGNC Symbol;Acc:HGNC:15736]	MSTRG.15118.2	u	chr17	74980954	74984870	MSTRG.15118	.	yes	novel	cis	100K	NA	-0.675665
ENST00000532894	0	chr17	74955821	74959915	MSTRG.15122	HID1	yes	GO:0000138(Golgi trans cisterna);GO:0000139(Golgi membrane);GO:0005515(protein binding);GO:0005737(cytoplasm);GO:0005794(Golgi apparatus);GO:0005797(Golgi medial cisterna);GO:0005829(cytosol);GO:0005881(cytoplasmic microtubule);GO:0006886(intracellular protein transport);GO:0016020(membrane);GO:0031001(response to brefeldin A);GO:0070062(extracellular exosome);GO:0090498(extrinsic component of Go…	NA	NA	NA	HID1 domain containing [Source:HGNC Symbol;Acc:HGNC:15736]	MSTRG.15118.2	u	chr17	74980954	74984870	MSTRG.15118	.	yes	novel	cis	100K	NA	-0.57613
ENST00000425042	0	chr17	74950742	74972759	MSTRG.15122	HID1	yes	GO:0000138(Golgi trans cisterna);GO:0000139(Golgi membrane);GO:0005515(protein binding);GO:0005737(cytoplasm);GO:0005794(Golgi apparatus);GO:0005797(Golgi medial cisterna);GO:0005829(cytosol);GO:0005881(cytoplasmic microtubule);GO:0006886(intracellular protein transport);GO:0016020(membrane);GO:0031001(response to brefeldin A);GO:0070062(extracellular exosome);GO:0090498(extrinsic component of Go…	NA	NA	NA	HID1 domain containing [Source:HGNC Symbol;Acc:HGNC:15736]	MSTRG.15118.2	u	chr17	74980954	74984870	MSTRG.15118	.	yes	novel	cis	100K	NA	-0.735865
ENST00000528902	0	chr17	74961597	74972763	MSTRG.15122	HID1	yes	GO:0000138(Golgi trans cisterna);GO:0000139(Golgi membrane);GO:0005515(protein binding);GO:0005737(cytoplasm);GO:0005794(Golgi apparatus);GO:0005797(Golgi medial cisterna);GO:0005829(cytosol);GO:0005881(cytoplasmic microtubule);GO:0006886(intracellular protein transport);GO:0016020(membrane);GO:0031001(response to brefeldin A);GO:0070062(extracellular exosome);GO:0090498(extrinsic component of Go…	NA	NA	NA	HID1 domain containing [Source:HGNC Symbol;Acc:HGNC:15736]	MSTRG.15118.2	u	chr17	74980954	74984870	MSTRG.15118	.	yes	novel	cis	100K	NA	-0.682418
ENST00000318565	0	chr17	74957969	74960095	MSTRG.15122	HID1	yes	GO:0000138(Golgi trans cisterna);GO:0000139(Golgi membrane);GO:0005515(protein binding);GO:0005737(cytoplasm);GO:0005794(Golgi apparatus);GO:0005797(Golgi medial cisterna);GO:0005829(cytosol);GO:0005881(cytoplasmic microtubule);GO:0006886(intracellular protein transport);GO:0016020(membrane);GO:0031001(response to brefeldin A);GO:0070062(extracellular exosome);GO:0090498(extrinsic component of Go…	NA	NA	NA	HID1 domain containing [Source:HGNC Symbol;Acc:HGNC:15736]	MSTRG.15118.2	u	chr17	74980954	74984870	MSTRG.15118	.	yes	novel	cis	100K	NA	-0.676624
MSTRG.15122.9	j	chr17	74961597	74972732	MSTRG.15122	HID1	yes	NA	NA	NA	NA	NA	MSTRG.15118.2	u	chr17	74980954	74984870	MSTRG.15118	.	yes	novel	cis	100K	NA	-0.570753
MSTRG.9523.2	o	chr14	49790842	49862846	MSTRG.9523	RNU6-539P	yes	NA	NA	NA	NA	NA	MSTRG.9523.2	o	chr14	49790842	49862846	MSTRG.9523	RNU6-539P	yes	novel	cis	1K	NA	1
MSTRG.9522.1	j	chr14	49780825	50202176	MSTRG.9522	NEMF	yes	NA	NA	NA	NA	NA	MSTRG.9523.2	o	chr14	49790842	49862846	MSTRG.9523	RNU6-539P	yes	novel	cis	100K	NA	-0.180647
MSTRG.19661.11	j	chr2	190649134	190690919	MSTRG.19661	NAB1	yes	NA	NA	NA	NA	NA	MSTRG.19662.5	o	chr2	190690378	190844594	MSTRG.19662	AC006460	yes	novel	cis	100K	NA	-0.485582
MSTRG.19662.5	o	chr2	190690378	190844594	MSTRG.19662	AC006460	yes	NA	NA	NA	NA	NA	MSTRG.19662.5	o	chr2	190690378	190844594	MSTRG.19662	AC006460	yes	novel	cis	1K	NA	1
MSTRG.12416.2	o	chr16	29808630	29811206	MSTRG.12416	AC009133	yes	NA	NA	NA	NA	NA	MSTRG.12416.2	o	chr16	29808630	29811206	MSTRG.12416	AC009133	yes	novel	cis	1K	NA	1
MSTRG.12404.6	j	chr16	29871168	29895863	MSTRG.12404	SEZ6L2	yes	NA	NA	NA	NA	NA	MSTRG.12416.2	o	chr16	29808630	29811206	MSTRG.12416	AC009133	yes	novel	cis	100K	NA	-0.257283
MSTRG.12416.1	o	chr16	29807137	29811192	MSTRG.12416	AC009133	yes	NA	NA	NA	NA	NA	MSTRG.12416.2	o	chr16	29808630	29811206	MSTRG.12416	AC009133	yes	novel	cis	10K	NA	0.837663
ENST00000308713	0	chr16	29871159	29899547	MSTRG.12404	SEZ6L2	yes	GO:0005783(endoplasmic reticulum);GO:0005789(endoplasmic reticulum membrane);GO:0005886(plasma membrane);GO:0008344(adult locomotory behavior);GO:0016020(membrane);GO:0016021(integral component of membrane);GO:0021680(cerebellar Purkinje cell layer development);GO:0043025(neuronal cell body);GO:0060074(synapse maturation);GO:0090036(regulation of protein kinase C signaling)	NA	NA	NA	seizure related 6 homolog like 2 [Source:HGNC Symbol;Acc:HGNC:30844]	MSTRG.12416.2	o	chr16	29808630	29811206	MSTRG.12416	AC009133	yes	novel	cis	100K	NA	-0.394526
ENST00000569981	0	chr16	29808636	29811985	MSTRG.12416	AC009133	yes	NA	NA	NA	NA	novel transcript, antisense to C16orf53 and MVP	MSTRG.12416.2	o	chr16	29808630	29811206	MSTRG.12416	AC009133	yes	novel	cis	1K	NA	-0.263088
MSTRG.28451.4	j	chr6	75601927	75663505	MSTRG.28451	SENP6	yes	NA	NA	NA	NA	NA	MSTRG.28451.4	j	chr6	75601927	75663505	MSTRG.28451	SENP6	yes	novel	cis	1K	NA	1
MSTRG.28451.6	j	chr6	75601927	75679867	MSTRG.28451	SENP6	yes	NA	NA	NA	NA	NA	MSTRG.28451.4	j	chr6	75601927	75663505	MSTRG.28451	SENP6	yes	novel	cis	1K	NA	0.547608
ENST00000493959	0	chr6	75602224	75634811	MSTRG.28451	SENP6	yes	GO:0005515(protein binding);GO:0005634(nucleus);GO:0005654(nucleoplasm);GO:0005737(cytoplasm);GO:0005829(cytosol);GO:0006508(proteolysis);GO:0008233(peptidase activity);GO:0008234(cysteine-type peptidase activity);GO:0016787(hydrolase activity);GO:0016925(protein sumoylation);GO:0016926(protein desumoylation);GO:0070139(SUMO-specific endopeptidase activity);GO:0070646(protein modification by smal…	NA	K08595	EC:3.4.22.68	SUMO specific peptidase 6 [Source:HGNC Symbol;Acc:HGNC:20944]	MSTRG.28451.4	j	chr6	75601927	75663505	MSTRG.28451	SENP6	yes	novel	cis	1K	NA	-0.560152
MSTRG.25927.2	j	chr5	36636602	36725173	MSTRG.25927	AC008957	yes	NA	NA	NA	NA	NA	MSTRG.25927.2	j	chr5	36636602	36725173	MSTRG.25927	AC008957	yes	novel	cis	1K	NA	1
MSTRG.347.6	o	chr1	16507438	16514285	MSTRG.347	RNU1-1	yes	NA	NA	NA	NA	NA	MSTRG.347.6	o	chr1	16507438	16514285	MSTRG.347	RNU1-1	yes	novel	cis	1K	NA	1
ENST00000599069	0	chr1	16599589	16613562	MSTRG.354	NBPF1	yes	GO:0005737(cytoplasm)	NA	NA	NA	NBPF member 1 [Source:HGNC Symbol;Acc:HGNC:26088]	MSTRG.347.6	o	chr1	16507438	16514285	MSTRG.347	RNU1-1	yes	novel	cis	100K	NA	0.845271
MSTRG.21101.30	o	chr21	8214778	8442701	MSTRG.21101	FP671120	yes	NA	NA	NA	NA	NA	MSTRG.21101.30	o	chr21	8214778	8442701	MSTRG.21101	FP671120	yes	novel	cis	1K	NA	1
MSTRG.21098.42	o	chr21	8213977	8401984	MSTRG.21098	FP236383	yes	NA	NA	NA	NA	NA	MSTRG.21101.30	o	chr21	8214778	8442701	MSTRG.21101	FP671120	yes	novel	cis	1K	NA	-0.297716
MSTRG.27601.14	j	chr6	22113306	22194893	MSTRG.27601	CASC15	yes	NA	NA	NA	NA	NA	MSTRG.27601.14	j	chr6	22113306	22194893	MSTRG.27601	CASC15	yes	novel	cis	1K	NA	1
ENST00000605917	0	chr6	22147208	22151668	MSTRG.27601	CASC15	yes	NA	NA	NA	NA	cancer susceptibility 15 [Source:HGNC Symbol;Acc:HGNC:28245]	MSTRG.27601.14	j	chr6	22113306	22194893	MSTRG.27601	CASC15	yes	novel	cis	100K	NA	0.924937
MSTRG.20881.1	i	chr20	61752611	61753768	MSTRG.20881	CDH4	yes	NA	NA	NA	NA	NA	MSTRG.20881.1	i	chr20	61752611	61753768	MSTRG.20881	CDH4	yes	novel	cis	1K	NA	1
MSTRG.20105.1	u	chr2	238560479	238561699	MSTRG.20105	.	yes	NA	NA	NA	NA	NA	MSTRG.20105.1	u	chr2	238560479	238561699	MSTRG.20105	.	yes	novel	cis	1K	NA	1
MSTRG.5556.9	j	chr11	65499056	65504463	MSTRG.5556	MALAT1	yes	NA	NA	NA	NA	NA	MSTRG.5556.9	j	chr11	65499056	65504463	MSTRG.5556	MALAT1	yes	novel	cis	1K	NA	1
MSTRG.603.2	x	chr1	28493360	28508705	MSTRG.603	PHACTR4	yes	NA	NA	NA	NA	NA	MSTRG.603.2	x	chr1	28493360	28508705	MSTRG.603	PHACTR4	yes	novel	cis	1K	NA	1
MSTRG.603.1	x	chr1	28481490	28507532	MSTRG.603	PHACTR4	yes	NA	NA	NA	NA	NA	MSTRG.603.2	x	chr1	28493360	28508705	MSTRG.603	PHACTR4	yes	novel	cis	100K	NA	0.969561
MSTRG.16339.4	u	chr19	5548902	5555054	MSTRG.16339	.	yes	NA	NA	NA	NA	NA	MSTRG.16339.4	u	chr19	5548902	5555054	MSTRG.16339	.	yes	novel	cis	1K	NA	1
MSTRG.16339.5	u	chr19	5548902	5553151	MSTRG.16339	.	yes	NA	NA	NA	NA	NA	MSTRG.16339.4	u	chr19	5548902	5555054	MSTRG.16339	.	yes	novel	cis	1K	NA	0.422871
MSTRG.20615.1	j	chr20	37289638	37317260	MSTRG.20615	MANBAL	yes	NA	NA	NA	NA	NA	MSTRG.20615.1	j	chr20	37289638	37317260	MSTRG.20615	MANBAL	yes	novel	cis	1K	NA	1
ENST00000397151	0	chr20	37297345	37317260	MSTRG.20615	MANBAL	yes	GO:0005515(protein binding);GO:0016020(membrane);GO:0016021(integral component of membrane)	NA	NA	NA	mannosidase beta like [Source:HGNC Symbol;Acc:HGNC:15799]	MSTRG.20615.1	j	chr20	37289638	37317260	MSTRG.20615	MANBAL	yes	novel	cis	10K	NA	-0.162774
MSTRG.23740.1	u	chr3	161879604	161881621	MSTRG.23740	.	yes	NA	NA	NA	NA	NA	MSTRG.23740.1	u	chr3	161879604	161881621	MSTRG.23740	.	yes	novel	cis	1K	NA	1
MSTRG.23765.1	u	chr3	161888415	161891838	MSTRG.23765	.	yes	NA	NA	NA	NA	NA	MSTRG.23740.1	u	chr3	161879604	161881621	MSTRG.23740	.	yes	novel	cis	10K	NA	0.915317
MSTRG.23761.1	p	chr3	161809560	161816000	MSTRG.23761	AC131211	yes	NA	NA	NA	NA	NA	MSTRG.23740.1	u	chr3	161879604	161881621	MSTRG.23740	.	yes	novel	cis	100K	NA	0.94544
MSTRG.23763.1	u	chr3	161827581	161832576	MSTRG.23763	.	yes	NA	NA	NA	NA	NA	MSTRG.23740.1	u	chr3	161879604	161881621	MSTRG.23740	.	yes	novel	cis	100K	NA	0.982885
MSTRG.23737.1	u	chr3	161850626	161862405	MSTRG.23737	.	yes	NA	NA	NA	NA	NA	MSTRG.23740.1	u	chr3	161879604	161881621	MSTRG.23740	.	yes	novel	cis	100K	NA	0.98664
MSTRG.23760.1	u	chr3	161794455	161806123	MSTRG.23760	.	yes	NA	NA	NA	NA	NA	MSTRG.23740.1	u	chr3	161879604	161881621	MSTRG.23740	.	yes	novel	cis	100K	NA	0.965324
MSTRG.23759.1	u	chr3	161783737	161786488	MSTRG.23759	.	yes	NA	NA	NA	NA	NA	MSTRG.23740.1	u	chr3	161879604	161881621	MSTRG.23740	.	yes	novel	cis	100K	NA	0.98409
MSTRG.23764.1	u	chr3	161836180	161840138	MSTRG.23764	.	yes	NA	NA	NA	NA	NA	MSTRG.23740.1	u	chr3	161879604	161881621	MSTRG.23740	.	yes	novel	cis	100K	NA	0.982042
MSTRG.23739.1	u	chr3	161869623	161870454	MSTRG.23739	.	yes	NA	NA	NA	NA	NA	MSTRG.23740.1	u	chr3	161879604	161881621	MSTRG.23740	.	yes	novel	cis	10K	NA	0.925819
ENST00000587806	0	chr19	11553047	11555467	MSTRG.16549	ELOF1	yes	GO:0000993(RNA polymerase II complex binding);GO:0003746(translation elongation factor activity);GO:0005515(protein binding);GO:0005634(nucleus);GO:0006368(transcription elongation from RNA polymerase II promoter);GO:0006414(translational elongation);GO:0008023(transcription elongation factor complex);GO:0046872(metal ion binding);GO:0048096(chromatin-mediated maintenance of transcription)	NA	NA	NA	elongation factor 1 homolog [Source:HGNC Symbol;Acc:HGNC:28691]	MSTRG.16549.6	j	chr19	11553047	11559236	MSTRG.16549	ELOF1	yes	novel	cis	1K	NA	0.36275
MSTRG.16549.6	j	chr19	11553047	11559236	MSTRG.16549	ELOF1	yes	NA	NA	NA	NA	NA	MSTRG.16549.6	j	chr19	11553047	11559236	MSTRG.16549	ELOF1	yes	novel	cis	1K	NA	1
MSTRG.16549.3	j	chr19	11553043	11559236	MSTRG.16549	ELOF1	yes	NA	NA	NA	NA	NA	MSTRG.16549.6	j	chr19	11553047	11559236	MSTRG.16549	ELOF1	yes	novel	cis	1K	NA	-0.397535
MSTRG.16549.2	j	chr19	11553043	11559230	MSTRG.16549	ELOF1	yes	NA	NA	NA	NA	NA	MSTRG.16549.6	j	chr19	11553047	11559236	MSTRG.16549	ELOF1	yes	novel	cis	1K	NA	-0.323287
MSTRG.19830.16	j	chr2	207579003	207603431	MSTRG.19830	CREB1	yes	NA	NA	NA	NA	NA	MSTRG.19830.16	j	chr2	207579003	207603431	MSTRG.19830	CREB1	yes	novel	cis	1K	NA	1
MSTRG.33432.3	j	chr9	134025495	134030277	MSTRG.33432	BRD3OS	yes	NA	NA	NA	NA	NA	MSTRG.33432.3	j	chr9	134025495	134030277	MSTRG.33432	BRD3OS	yes	novel	cis	1K	NA	1
MSTRG.10826.7	o	chr15	50355476	50371636	MSTRG.10826	GABPB1-AS1	yes	NA	NA	NA	NA	NA	MSTRG.10826.7	o	chr15	50355476	50371636	MSTRG.10826	GABPB1-AS1	yes	novel	cis	1K	NA	1
MSTRG.34228.5	j	chrX	102769218	102912387	MSTRG.34228	LINC00630	yes	NA	NA	NA	NA	NA	MSTRG.34228.5	j	chrX	102769218	102912387	MSTRG.34228	LINC00630	yes	novel	cis	1K	NA	1
ENST00000361229	0	chrX	102720726	102752441	MSTRG.34221	BHLHB9	yes	GO:0005634(nucleus);GO:0005654(nucleoplasm);GO:0005737(cytoplasm);GO:0005829(cytosol);GO:0007611(learning or memory);GO:0042803(protein homodimerization activity);GO:0043524(negative regulation of neuron apoptotic process);GO:0050769(positive regulation of neurogenesis);GO:0051965(positive regulation of synapse assembly);GO:0061003(positive regulation of dendritic spine morphogenesis);GO:0070062(…	NA	NA	NA	basic helix-loop-helix family member b9 [Source:HGNC Symbol;Acc:HGNC:29353]	MSTRG.34228.5	j	chrX	102769218	102912387	MSTRG.34228	LINC00630	yes	novel	cis	100K	NA	0.784132
MSTRG.27412.1	u	chr6	3897949	3901956	MSTRG.27412	.	yes	NA	NA	NA	NA	NA	MSTRG.27412.1	u	chr6	3897949	3901956	MSTRG.27412	.	yes	novel	cis	1K	NA	1
MSTRG.12416.2	o	chr16	29808630	29811206	MSTRG.12416	AC009133	yes	NA	NA	NA	NA	NA	MSTRG.12416.1	o	chr16	29807137	29811192	MSTRG.12416	AC009133	yes	novel	cis	10K	NA	0.837663
MSTRG.12404.6	j	chr16	29871168	29895863	MSTRG.12404	SEZ6L2	yes	NA	NA	NA	NA	NA	MSTRG.12416.1	o	chr16	29807137	29811192	MSTRG.12416	AC009133	yes	novel	cis	100K	NA	-0.184608
MSTRG.12416.1	o	chr16	29807137	29811192	MSTRG.12416	AC009133	yes	NA	NA	NA	NA	NA	MSTRG.12416.1	o	chr16	29807137	29811192	MSTRG.12416	AC009133	yes	novel	cis	1K	NA	1
ENST00000308713	0	chr16	29871159	29899547	MSTRG.12404	SEZ6L2	yes	GO:0005783(endoplasmic reticulum);GO:0005789(endoplasmic reticulum membrane);GO:0005886(plasma membrane);GO:0008344(adult locomotory behavior);GO:0016020(membrane);GO:0016021(integral component of membrane);GO:0021680(cerebellar Purkinje cell layer development);GO:0043025(neuronal cell body);GO:0060074(synapse maturation);GO:0090036(regulation of protein kinase C signaling)	NA	NA	NA	seizure related 6 homolog like 2 [Source:HGNC Symbol;Acc:HGNC:30844]	MSTRG.12416.1	o	chr16	29807137	29811192	MSTRG.12416	AC009133	yes	novel	cis	100K	NA	-0.325028
ENST00000569981	0	chr16	29808636	29811985	MSTRG.12416	AC009133	yes	NA	NA	NA	NA	novel transcript, antisense to C16orf53 and MVP	MSTRG.12416.1	o	chr16	29807137	29811192	MSTRG.12416	AC009133	yes	novel	cis	10K	NA	-0.11074
MSTRG.350.1	o	chr1	16475443	16623988	MSTRG.350	AL137802	yes	NA	NA	NA	NA	NA	MSTRG.350.1	o	chr1	16475443	16623988	MSTRG.350	AL137802	yes	novel	cis	1K	NA	1
MSTRG.25942.2	j	chr5	38556866	38566147	MSTRG.25942	LIFR-AS1	yes	NA	NA	NA	NA	NA	MSTRG.25942.2	j	chr5	38556866	38566147	MSTRG.25942	LIFR-AS1	yes	novel	cis	1K	NA	1
MSTRG.30387.3	j	chr7	110663208	111276618	MSTRG.30387	IMMP2L	yes	NA	NA	NA	NA	NA	MSTRG.30387.3	j	chr7	110663208	111276618	MSTRG.30387	IMMP2L	yes	novel	cis	1K	NA	1
MSTRG.15209.5	u	chr17	76606015	76611177	MSTRG.15209	.	yes	NA	NA	NA	NA	NA	MSTRG.15209.5	u	chr17	76606015	76611177	MSTRG.15209	.	yes	novel	cis	1K	NA	1
ENST00000375036	0	chr17	76679569	76711004	MSTRG.15222	MXRA7	yes	GO:0016020(membrane);GO:0016021(integral component of membrane);GO:0062023(collagen-containing extracellular matrix)	NA	NA	NA	matrix remodeling associated 7 [Source:HGNC Symbol;Acc:HGNC:7541]	MSTRG.15209.5	u	chr17	76606015	76611177	MSTRG.15209	.	yes	novel	cis	100K	NA	-0.355771
MSTRG.15209.3	u	chr17	76606015	76611214	MSTRG.15209	.	yes	NA	NA	NA	NA	NA	MSTRG.15209.5	u	chr17	76606015	76611177	MSTRG.15209	.	yes	novel	cis	1K	NA	-0.208172
MSTRG.25073.3	j	chr4	109815635	109824727	MSTRG.25073	GAR1	yes	NA	NA	NA	NA	NA	MSTRG.25073.3	j	chr4	109815635	109824727	MSTRG.25073	GAR1	yes	novel	cis	1K	NA	1
MSTRG.23740.1	u	chr3	161879604	161881621	MSTRG.23740	.	yes	NA	NA	NA	NA	NA	MSTRG.23765.1	u	chr3	161888415	161891838	MSTRG.23765	.	yes	novel	cis	10K	NA	0.915317
MSTRG.23765.1	u	chr3	161888415	161891838	MSTRG.23765	.	yes	NA	NA	NA	NA	NA	MSTRG.23765.1	u	chr3	161888415	161891838	MSTRG.23765	.	yes	novel	cis	1K	NA	1
MSTRG.23761.1	p	chr3	161809560	161816000	MSTRG.23761	AC131211	yes	NA	NA	NA	NA	NA	MSTRG.23765.1	u	chr3	161888415	161891838	MSTRG.23765	.	yes	novel	cis	100K	NA	0.980185
MSTRG.23763.1	u	chr3	161827581	161832576	MSTRG.23763	.	yes	NA	NA	NA	NA	NA	MSTRG.23765.1	u	chr3	161888415	161891838	MSTRG.23765	.	yes	novel	cis	100K	NA	0.960084
MSTRG.23737.1	u	chr3	161850626	161862405	MSTRG.23737	.	yes	NA	NA	NA	NA	NA	MSTRG.23765.1	u	chr3	161888415	161891838	MSTRG.23765	.	yes	novel	cis	100K	NA	0.918234
MSTRG.23760.1	u	chr3	161794455	161806123	MSTRG.23760	.	yes	NA	NA	NA	NA	NA	MSTRG.23765.1	u	chr3	161888415	161891838	MSTRG.23765	.	yes	novel	cis	100K	NA	0.937092
MSTRG.23764.1	u	chr3	161836180	161840138	MSTRG.23764	.	yes	NA	NA	NA	NA	NA	MSTRG.23765.1	u	chr3	161888415	161891838	MSTRG.23765	.	yes	novel	cis	100K	NA	0.898597
MSTRG.23739.1	u	chr3	161869623	161870454	MSTRG.23739	.	yes	NA	NA	NA	NA	NA	MSTRG.23765.1	u	chr3	161888415	161891838	MSTRG.23765	.	yes	novel	cis	100K	NA	0.866004
MSTRG.32345.1	u	chr9	22424417	22443192	MSTRG.32345	.	yes	NA	NA	NA	NA	NA	MSTRG.32338.1	u	chr9	22468949	22473101	MSTRG.32338	.	yes	novel	cis	100K	NA	0.973416
MSTRG.32338.1	u	chr9	22468949	22473101	MSTRG.32338	.	yes	NA	NA	NA	NA	NA	MSTRG.32338.1	u	chr9	22468949	22473101	MSTRG.32338	.	yes	novel	cis	1K	NA	1
MSTRG.32342.1	u	chr9	22481657	22482423	MSTRG.32342	.	yes	NA	NA	NA	NA	NA	MSTRG.32338.1	u	chr9	22468949	22473101	MSTRG.32338	.	yes	novel	cis	100K	NA	0.984547
MSTRG.21101.1	o	chr21	8205942	8442701	MSTRG.21101	FP671120	yes	NA	NA	NA	NA	NA	MSTRG.21101.2	o	chr21	8205942	8444842	MSTRG.21101	FP671120	yes	novel	cis	1K	NA	-0.0657691
MSTRG.21098.18	o	chr21	8206428	8251839	MSTRG.21098	FP671120	yes	NA	NA	NA	NA	NA	MSTRG.21101.2	o	chr21	8205942	8444842	MSTRG.21101	FP671120	yes	novel	cis	1K	NA	-0.220853
MSTRG.21101.7	o	chr21	8205942	8437896	MSTRG.21101	FP671120	yes	NA	NA	NA	NA	NA	MSTRG.21101.2	o	chr21	8205942	8444842	MSTRG.21101	FP671120	yes	novel	cis	1K	NA	-0.0836511
MSTRG.21101.2	o	chr21	8205942	8444842	MSTRG.21101	FP671120	yes	NA	NA	NA	NA	NA	MSTRG.21101.2	o	chr21	8205942	8444842	MSTRG.21101	FP671120	yes	novel	cis	1K	NA	1
MSTRG.21101.19	o	chr21	8206428	8442703	MSTRG.21101	FP671120	yes	NA	NA	NA	NA	NA	MSTRG.21101.2	o	chr21	8205942	8444842	MSTRG.21101	FP671120	yes	novel	cis	1K	NA	-0.251784
MSTRG.21101.21	o	chr21	8209677	8260758	MSTRG.21101	FP671120	yes	NA	NA	NA	NA	NA	MSTRG.21101.2	o	chr21	8205942	8444842	MSTRG.21101	FP671120	yes	novel	cis	10K	NA	-0.0992387
MSTRG.21098.14	o	chr21	8206397	8435553	MSTRG.21098	FP236383	yes	NA	NA	NA	NA	NA	MSTRG.21101.2	o	chr21	8205942	8444842	MSTRG.21101	FP671120	yes	novel	cis	1K	NA	-0.162573
MSTRG.21098.36	o	chr21	8209686	8254215	MSTRG.21098	FP671120	yes	NA	NA	NA	NA	NA	MSTRG.21101.2	o	chr21	8205942	8444842	MSTRG.21101	FP671120	yes	novel	cis	10K	NA	-0.341483
MSTRG.18363.2	i	chr2	58096709	58118790	MSTRG.18363	VRK2	yes	NA	NA	NA	NA	NA	MSTRG.18363.2	i	chr2	58096709	58118790	MSTRG.18363	VRK2	yes	novel	cis	1K	NA	1
MSTRG.1938.1	o	chr1	147955855	148038904	MSTRG.1938	GPR89B	yes	NA	NA	NA	NA	NA	MSTRG.1938.1	o	chr1	147955855	148038904	MSTRG.1938	GPR89B	yes	novel	cis	1K	NA	1
MSTRG.1937.4	j	chr1	147928409	147993339	MSTRG.1937	GPR89B	yes	NA	NA	NA	NA	NA	MSTRG.1938.1	o	chr1	147955855	148038904	MSTRG.1938	GPR89B	yes	novel	cis	100K	NA	0.531432
ENST00000478307	0	chr1	147928393	147993521	MSTRG.1937	GPR89B	yes	GO:0000139(Golgi membrane);GO:0005244(voltage-gated ion channel activity);GO:0005794(Golgi apparatus);GO:0006811(ion transport);GO:0008308(voltage-gated anion channel activity);GO:0015031(protein transport);GO:0015698(inorganic anion transport);GO:0016020(membrane);GO:0016021(integral component of membrane);GO:0032580(Golgi cisterna membrane);GO:0034220(ion transmembrane transport);GO:0034765(reg…	NA	K22193	NA	G protein-coupled receptor 89B [Source:HGNC Symbol;Acc:HGNC:13840]	MSTRG.1938.1	o	chr1	147955855	148038904	MSTRG.1938	GPR89B	yes	novel	cis	100K	NA	-0.204703
MSTRG.603.2	x	chr1	28493360	28508705	MSTRG.603	PHACTR4	yes	NA	NA	NA	NA	NA	MSTRG.603.1	x	chr1	28481490	28507532	MSTRG.603	PHACTR4	yes	novel	cis	100K	NA	0.969561
MSTRG.603.1	x	chr1	28481490	28507532	MSTRG.603	PHACTR4	yes	NA	NA	NA	NA	NA	MSTRG.603.1	x	chr1	28481490	28507532	MSTRG.603	PHACTR4	yes	novel	cis	1K	NA	1
MSTRG.22450.9	j	chr3	20905501	21148083	MSTRG.22450	SGO1-AS1	yes	NA	NA	NA	NA	NA	MSTRG.22450.9	j	chr3	20905501	21148083	MSTRG.22450	SGO1-AS1	yes	novel	cis	1K	NA	1
MSTRG.23755.1	u	chr3	161685174	161746752	MSTRG.23755	.	yes	NA	NA	NA	NA	NA	MSTRG.23758.1	u	chr3	161779346	161780824	MSTRG.23758	.	yes	novel	cis	100K	NA	0.908091
MSTRG.23757.1	u	chr3	161750377	161778813	MSTRG.23757	.	yes	NA	NA	NA	NA	NA	MSTRG.23758.1	u	chr3	161779346	161780824	MSTRG.23758	.	yes	novel	cis	100K	NA	0.916258
MSTRG.23761.1	p	chr3	161809560	161816000	MSTRG.23761	AC131211	yes	NA	NA	NA	NA	NA	MSTRG.23758.1	u	chr3	161779346	161780824	MSTRG.23758	.	yes	novel	cis	100K	NA	0.927351
MSTRG.23758.1	u	chr3	161779346	161780824	MSTRG.23758	.	yes	NA	NA	NA	NA	NA	MSTRG.23758.1	u	chr3	161779346	161780824	MSTRG.23758	.	yes	novel	cis	1K	NA	1
MSTRG.23763.1	u	chr3	161827581	161832576	MSTRG.23763	.	yes	NA	NA	NA	NA	NA	MSTRG.23758.1	u	chr3	161779346	161780824	MSTRG.23758	.	yes	novel	cis	100K	NA	0.888141
MSTRG.23737.1	u	chr3	161850626	161862405	MSTRG.23737	.	yes	NA	NA	NA	NA	NA	MSTRG.23758.1	u	chr3	161779346	161780824	MSTRG.23758	.	yes	novel	cis	100K	NA	0.94673
MSTRG.23760.1	u	chr3	161794455	161806123	MSTRG.23760	.	yes	NA	NA	NA	NA	NA	MSTRG.23758.1	u	chr3	161779346	161780824	MSTRG.23758	.	yes	novel	cis	100K	NA	0.928093
MSTRG.23759.1	u	chr3	161783737	161786488	MSTRG.23759	.	yes	NA	NA	NA	NA	NA	MSTRG.23758.1	u	chr3	161779346	161780824	MSTRG.23758	.	yes	novel	cis	10K	NA	0.92343
MSTRG.23764.1	u	chr3	161836180	161840138	MSTRG.23764	.	yes	NA	NA	NA	NA	NA	MSTRG.23758.1	u	chr3	161779346	161780824	MSTRG.23758	.	yes	novel	cis	100K	NA	0.945876
MSTRG.23739.1	u	chr3	161869623	161870454	MSTRG.23739	.	yes	NA	NA	NA	NA	NA	MSTRG.23758.1	u	chr3	161779346	161780824	MSTRG.23758	.	yes	novel	cis	100K	NA	0.976882
MSTRG.23013.2	o	chr3	75415870	75421537	MSTRG.23013	ALG1L6P	yes	NA	NA	NA	NA	NA	MSTRG.23013.2	o	chr3	75415870	75421537	MSTRG.23013	ALG1L6P	yes	novel	cis	1K	NA	1
MSTRG.13193.2	j	chr16	86474529	86478881	MSTRG.13193	FENDRR	yes	NA	NA	NA	NA	NA	MSTRG.13193.2	j	chr16	86474529	86478881	MSTRG.13193	FENDRR	yes	novel	cis	1K	NA	1
ENST00000599749	0	chr16	86487737	86509099	MSTRG.13193	FENDRR	yes	NA	NA	NA	NA	FOXF1 adjacent non-coding developmental regulatory RNA [Source:HGNC Symbol;Acc:HGNC:43894]	MSTRG.13193.2	j	chr16	86474529	86478881	MSTRG.13193	FENDRR	yes	novel	cis	100K	NA	0.451289
ENST00000595886	0	chr16	86474529	86508860	MSTRG.13193	FENDRR	yes	NA	NA	NA	NA	FOXF1 adjacent non-coding developmental regulatory RNA [Source:HGNC Symbol;Acc:HGNC:43894]	MSTRG.13193.2	j	chr16	86474529	86478881	MSTRG.13193	FENDRR	yes	novel	cis	1K	NA	0.627762
MSTRG.13194.1	i	chr16	86479092	86482594	MSTRG.13194	FENDRR	yes	NA	NA	NA	NA	NA	MSTRG.13193.2	j	chr16	86474529	86478881	MSTRG.13193	FENDRR	yes	novel	cis	10K	NA	0.828678
ENST00000598996	0	chr16	86487706	86490879	MSTRG.13193	FENDRR	yes	NA	NA	NA	NA	FOXF1 adjacent non-coding developmental regulatory RNA [Source:HGNC Symbol;Acc:HGNC:43894]	MSTRG.13193.2	j	chr16	86474529	86478881	MSTRG.13193	FENDRR	yes	novel	cis	100K	NA	0.737791
ENST00000593604	0	chr16	86490268	86508877	MSTRG.13193	FENDRR	yes	NA	NA	NA	NA	FOXF1 adjacent non-coding developmental regulatory RNA [Source:HGNC Symbol;Acc:HGNC:43894]	MSTRG.13193.2	j	chr16	86474529	86478881	MSTRG.13193	FENDRR	yes	novel	cis	100K	NA	0.736814
MSTRG.13193.9	j	chr16	86490226	86508877	MSTRG.13193	FENDRR	yes	NA	NA	NA	NA	NA	MSTRG.13193.2	j	chr16	86474529	86478881	MSTRG.13193	FENDRR	yes	novel	cis	100K	NA	0.860197
MSTRG.28736.1	i	chr6	112283735	112299234	MSTRG.28736	AL365214	yes	NA	NA	NA	NA	NA	MSTRG.28736.1	i	chr6	112283735	112299234	MSTRG.28736	AL365214	yes	novel	cis	1K	NA	1
MSTRG.14937.3	j	chr17	62289336	62296893	MSTRG.14937	AC053481	yes	NA	NA	NA	NA	NA	MSTRG.14937.3	j	chr17	62289336	62296893	MSTRG.14937	AC053481	yes	novel	cis	1K	NA	1
MSTRG.27375.2	u	chr6	1270765	1312072	MSTRG.27375	.	yes	NA	NA	NA	NA	NA	MSTRG.27375.2	u	chr6	1270765	1312072	MSTRG.27375	.	yes	novel	cis	1K	NA	1
MSTRG.27375.1	x	chr6	1270764	1312100	MSTRG.27375	FOXQ1	yes	NA	NA	NA	NA	NA	MSTRG.27375.2	u	chr6	1270765	1312072	MSTRG.27375	.	yes	novel	cis	1K	NA	0.94134
MSTRG.29177.33	j	chr6	165898744	165987914	MSTRG.29177	PDE10A	yes	NA	NA	NA	NA	NA	MSTRG.29177.33	j	chr6	165898744	165987914	MSTRG.29177	PDE10A	yes	novel	cis	1K	NA	1
MSTRG.26203.2	j	chr5	70481051	70586156	MSTRG.26203	AC146944	yes	NA	NA	NA	NA	NA	MSTRG.26203.2	j	chr5	70481051	70586156	MSTRG.26203	AC146944	yes	novel	cis	1K	NA	1
MSTRG.26199.1	j	chr5	70401605	70858175	MSTRG.26199	AC139272	yes	NA	NA	NA	NA	NA	MSTRG.26203.2	j	chr5	70481051	70586156	MSTRG.26203	AC146944	yes	novel	cis	100K	NA	0.505211
MSTRG.5556.14	j	chr11	65501960	65506465	MSTRG.5556	MALAT1	yes	NA	NA	NA	NA	NA	MSTRG.5556.14	j	chr11	65501960	65506465	MSTRG.5556	MALAT1	yes	novel	cis	1K	NA	1
MSTRG.27487.2	j	chr6	10412878	10416921	MSTRG.27487	TFAP2A-AS1	yes	NA	NA	NA	NA	NA	MSTRG.27487.2	j	chr6	10412878	10416921	MSTRG.27487	TFAP2A-AS1	yes	novel	cis	1K	NA	1
ENST00000496285	0	chr6	10429255	10434822	ENSG00000183674	LINC00518	yes	NA	NA	NA	NA	long intergenic non-protein coding RNA 518 [Source:HGNC Symbol;Acc:HGNC:28626]	MSTRG.27487.2	j	chr6	10412878	10416921	MSTRG.27487	TFAP2A-AS1	yes	novel	cis	100K	NA	-0.589279
MSTRG.23740.1	u	chr3	161879604	161881621	MSTRG.23740	.	yes	NA	NA	NA	NA	NA	MSTRG.23763.1	u	chr3	161827581	161832576	MSTRG.23763	.	yes	novel	cis	100K	NA	0.982885
MSTRG.23757.1	u	chr3	161750377	161778813	MSTRG.23757	.	yes	NA	NA	NA	NA	NA	MSTRG.23763.1	u	chr3	161827581	161832576	MSTRG.23763	.	yes	novel	cis	100K	NA	0.996088
MSTRG.23765.1	u	chr3	161888415	161891838	MSTRG.23765	.	yes	NA	NA	NA	NA	NA	MSTRG.23763.1	u	chr3	161827581	161832576	MSTRG.23763	.	yes	novel	cis	100K	NA	0.960084
MSTRG.23761.1	p	chr3	161809560	161816000	MSTRG.23761	AC131211	yes	NA	NA	NA	NA	NA	MSTRG.23763.1	u	chr3	161827581	161832576	MSTRG.23763	.	yes	novel	cis	100K	NA	0.970819
MSTRG.23758.1	u	chr3	161779346	161780824	MSTRG.23758	.	yes	NA	NA	NA	NA	NA	MSTRG.23763.1	u	chr3	161827581	161832576	MSTRG.23763	.	yes	novel	cis	100K	NA	0.888141
MSTRG.23763.1	u	chr3	161827581	161832576	MSTRG.23763	.	yes	NA	NA	NA	NA	NA	MSTRG.23763.1	u	chr3	161827581	161832576	MSTRG.23763	.	yes	novel	cis	1K	NA	1
MSTRG.23737.1	u	chr3	161850626	161862405	MSTRG.23737	.	yes	NA	NA	NA	NA	NA	MSTRG.23763.1	u	chr3	161827581	161832576	MSTRG.23763	.	yes	novel	cis	100K	NA	0.981857
MSTRG.23760.1	u	chr3	161794455	161806123	MSTRG.23760	.	yes	NA	NA	NA	NA	NA	MSTRG.23763.1	u	chr3	161827581	161832576	MSTRG.23763	.	yes	novel	cis	100K	NA	0.986548
MSTRG.23759.1	u	chr3	161783737	161786488	MSTRG.23759	.	yes	NA	NA	NA	NA	NA	MSTRG.23763.1	u	chr3	161827581	161832576	MSTRG.23763	.	yes	novel	cis	100K	NA	0.990472
MSTRG.23764.1	u	chr3	161836180	161840138	MSTRG.23764	.	yes	NA	NA	NA	NA	NA	MSTRG.23763.1	u	chr3	161827581	161832576	MSTRG.23763	.	yes	novel	cis	10K	NA	0.976734
MSTRG.23739.1	u	chr3	161869623	161870454	MSTRG.23739	.	yes	NA	NA	NA	NA	NA	MSTRG.23763.1	u	chr3	161827581	161832576	MSTRG.23763	.	yes	novel	cis	100K	NA	0.932447
MSTRG.17437.1	u	chr19	47238530	47244332	MSTRG.17437	.	yes	NA	NA	NA	NA	NA	MSTRG.17437.1	u	chr19	47238530	47244332	MSTRG.17437	.	yes	novel	cis	1K	NA	1
MSTRG.17438.1	j	chr19	47220822	47231206	MSTRG.17438	BBC3	yes	NA	NA	NA	NA	NA	MSTRG.17437.1	u	chr19	47238530	47244332	MSTRG.17437	.	yes	novel	cis	100K	NA	0.861935
MSTRG.21101.1	o	chr21	8205942	8442701	MSTRG.21101	FP671120	yes	NA	NA	NA	NA	NA	MSTRG.21101.19	o	chr21	8206428	8442703	MSTRG.21101	FP671120	yes	novel	cis	1K	NA	-0.232368
MSTRG.21098.18	o	chr21	8206428	8251839	MSTRG.21098	FP671120	yes	NA	NA	NA	NA	NA	MSTRG.21101.19	o	chr21	8206428	8442703	MSTRG.21101	FP671120	yes	novel	cis	1K	NA	0.393404
MSTRG.21101.7	o	chr21	8205942	8437896	MSTRG.21101	FP671120	yes	NA	NA	NA	NA	NA	MSTRG.21101.19	o	chr21	8206428	8442703	MSTRG.21101	FP671120	yes	novel	cis	1K	NA	-0.256971
MSTRG.21101.2	o	chr21	8205942	8444842	MSTRG.21101	FP671120	yes	NA	NA	NA	NA	NA	MSTRG.21101.19	o	chr21	8206428	8442703	MSTRG.21101	FP671120	yes	novel	cis	1K	NA	-0.251784
MSTRG.21101.19	o	chr21	8206428	8442703	MSTRG.21101	FP671120	yes	NA	NA	NA	NA	NA	MSTRG.21101.19	o	chr21	8206428	8442703	MSTRG.21101	FP671120	yes	novel	cis	1K	NA	1
MSTRG.21101.21	o	chr21	8209677	8260758	MSTRG.21101	FP671120	yes	NA	NA	NA	NA	NA	MSTRG.21101.19	o	chr21	8206428	8442703	MSTRG.21101	FP671120	yes	novel	cis	10K	NA	-0.314032
MSTRG.21098.14	o	chr21	8206397	8435553	MSTRG.21098	FP236383	yes	NA	NA	NA	NA	NA	MSTRG.21101.19	o	chr21	8206428	8442703	MSTRG.21101	FP671120	yes	novel	cis	1K	NA	-0.339694
MSTRG.21098.36	o	chr21	8209686	8254215	MSTRG.21098	FP671120	yes	NA	NA	NA	NA	NA	MSTRG.21101.19	o	chr21	8206428	8442703	MSTRG.21101	FP671120	yes	novel	cis	10K	NA	0.163474
MSTRG.1880.1	o	chr1	145462902	145465780	MSTRG.1880	RF00003	yes	NA	NA	NA	NA	NA	MSTRG.1880.1	o	chr1	145462902	145465780	MSTRG.1880	RF00003	yes	novel	cis	1K	NA	1
ENST00000566025	c	chr13	31952580	31953361	MSTRG.8559	EEF1DP3	yes	NA	NA	NA	NA	eukaryotic translation elongation factor 1 delta pseudogene 3 [Source:HGNC Symbol;Acc:HGNC:30486]	MSTRG.8561.1	i	chr13	31957713	31958548	MSTRG.8561	FRY	yes	novel	cis	10K	NA	0.869838
MSTRG.8561.1	i	chr13	31957713	31958548	MSTRG.8561	FRY	yes	NA	NA	NA	NA	NA	MSTRG.8561.1	i	chr13	31957713	31958548	MSTRG.8561	FRY	yes	novel	cis	1K	NA	1
ENST00000624392	0	chr13	31960325	31961946	MSTRG.8562	AC002525	yes	NA	NA	NA	NA	TEC	MSTRG.8561.1	i	chr13	31957713	31958548	MSTRG.8561	FRY	yes	novel	cis	10K	NA	0.937353
ENST00000647500	0	chr13	31945826	32299105	MSTRG.8559	FRY	yes	GO:0000902(cell morphogenesis);GO:0000922(spindle pole);GO:0004857(enzyme inhibitor activity);GO:0005737(cytoplasm);GO:0005815(microtubule organizing center);GO:0005856(cytoskeleton);GO:0005938(cell cortex);GO:0031175(neuron projection development);GO:0043086(negative regulation of catalytic activity);GO:1904428(negative regulation of tubulin deacetylation)	NA	NA	NA	FRY microtubule binding protein [Source:HGNC Symbol;Acc:HGNC:20367]	MSTRG.8561.1	i	chr13	31957713	31958548	MSTRG.8561	FRY	yes	novel	cis	100K	NA	0.625816
MSTRG.8560.1	i	chr13	31954969	31956248	MSTRG.8560	FRY	yes	NA	NA	NA	NA	NA	MSTRG.8561.1	i	chr13	31957713	31958548	MSTRG.8561	FRY	yes	novel	cis	10K	NA	0.984747
ENST00000490410	0	chr13	31950159	31953441	MSTRG.8559	FRY	yes	GO:0000902(cell morphogenesis);GO:0000922(spindle pole);GO:0004857(enzyme inhibitor activity);GO:0005737(cytoplasm);GO:0005815(microtubule organizing center);GO:0005856(cytoskeleton);GO:0005938(cell cortex);GO:0031175(neuron projection development);GO:0043086(negative regulation of catalytic activity);GO:1904428(negative regulation of tubulin deacetylation)	NA	NA	NA	FRY microtubule binding protein [Source:HGNC Symbol;Acc:HGNC:20367]	MSTRG.8561.1	i	chr13	31957713	31958548	MSTRG.8561	FRY	yes	novel	cis	10K	NA	0.924503
MSTRG.21101.53	o	chr21	8389475	8438551	MSTRG.21101	FP236383	yes	NA	NA	NA	NA	NA	MSTRG.21101.53	o	chr21	8389475	8438551	MSTRG.21101	FP236383	yes	novel	cis	1K	NA	1
MSTRG.21098.52	o	chr21	8386841	8437288	MSTRG.21098	FP236383	yes	NA	NA	NA	NA	NA	MSTRG.21101.53	o	chr21	8389475	8438551	MSTRG.21101	FP236383	yes	novel	cis	10K	NA	-0.324091
MSTRG.21098.57	o	chr21	8389443	8445518	MSTRG.21098	FP236383	yes	NA	NA	NA	NA	NA	MSTRG.21101.53	o	chr21	8389475	8438551	MSTRG.21101	FP236383	yes	novel	cis	1K	NA	-0.209654
MSTRG.32962.2	j	chr9	99222282	99238095	MSTRG.32962	SEC61B	yes	NA	NA	NA	NA	NA	MSTRG.32962.2	j	chr9	99222282	99238095	MSTRG.32962	SEC61B	yes	novel	cis	1K	NA	1
MSTRG.17666.4	j	chr19	55006249	55043916	MSTRG.17666	AC011476	yes	NA	NA	NA	NA	NA	MSTRG.17666.4	j	chr19	55006249	55043916	MSTRG.17666	AC011476	yes	novel	cis	1K	NA	1
MSTRG.23740.1	u	chr3	161879604	161881621	MSTRG.23740	.	yes	NA	NA	NA	NA	NA	MSTRG.23760.1	u	chr3	161794455	161806123	MSTRG.23760	.	yes	novel	cis	100K	NA	0.965324
MSTRG.23757.1	u	chr3	161750377	161778813	MSTRG.23757	.	yes	NA	NA	NA	NA	NA	MSTRG.23760.1	u	chr3	161794455	161806123	MSTRG.23760	.	yes	novel	cis	100K	NA	0.991016
MSTRG.23765.1	u	chr3	161888415	161891838	MSTRG.23765	.	yes	NA	NA	NA	NA	NA	MSTRG.23760.1	u	chr3	161794455	161806123	MSTRG.23760	.	yes	novel	cis	100K	NA	0.937092
MSTRG.23761.1	p	chr3	161809560	161816000	MSTRG.23761	AC131211	yes	NA	NA	NA	NA	NA	MSTRG.23760.1	u	chr3	161794455	161806123	MSTRG.23760	.	yes	novel	cis	100K	NA	0.968071
MSTRG.23758.1	u	chr3	161779346	161780824	MSTRG.23758	.	yes	NA	NA	NA	NA	NA	MSTRG.23760.1	u	chr3	161794455	161806123	MSTRG.23760	.	yes	novel	cis	100K	NA	0.928093
MSTRG.23763.1	u	chr3	161827581	161832576	MSTRG.23763	.	yes	NA	NA	NA	NA	NA	MSTRG.23760.1	u	chr3	161794455	161806123	MSTRG.23760	.	yes	novel	cis	100K	NA	0.986548
MSTRG.23737.1	u	chr3	161850626	161862405	MSTRG.23737	.	yes	NA	NA	NA	NA	NA	MSTRG.23760.1	u	chr3	161794455	161806123	MSTRG.23760	.	yes	novel	cis	100K	NA	0.988154
MSTRG.23760.1	u	chr3	161794455	161806123	MSTRG.23760	.	yes	NA	NA	NA	NA	NA	MSTRG.23760.1	u	chr3	161794455	161806123	MSTRG.23760	.	yes	novel	cis	1K	NA	1
MSTRG.23759.1	u	chr3	161783737	161786488	MSTRG.23759	.	yes	NA	NA	NA	NA	NA	MSTRG.23760.1	u	chr3	161794455	161806123	MSTRG.23760	.	yes	novel	cis	100K	NA	0.986893
MSTRG.23764.1	u	chr3	161836180	161840138	MSTRG.23764	.	yes	NA	NA	NA	NA	NA	MSTRG.23760.1	u	chr3	161794455	161806123	MSTRG.23760	.	yes	novel	cis	100K	NA	0.986775
MSTRG.23739.1	u	chr3	161869623	161870454	MSTRG.23739	.	yes	NA	NA	NA	NA	NA	MSTRG.23760.1	u	chr3	161794455	161806123	MSTRG.23760	.	yes	novel	cis	100K	NA	0.970759
MSTRG.15010.1	o	chr17	64932750	64962744	MSTRG.15010	AC103810	yes	NA	NA	NA	NA	NA	MSTRG.15010.1	o	chr17	64932750	64962744	MSTRG.15010	AC103810	yes	novel	cis	1K	NA	1
MSTRG.25945.3	j	chr5	36871364	36876700	MSTRG.25945	NIPBL-DT	yes	NA	NA	NA	NA	NA	MSTRG.25945.3	j	chr5	36871364	36876700	MSTRG.25945	NIPBL-DT	yes	novel	cis	1K	NA	1
ENST00000448238	0	chr5	36876790	37064190	MSTRG.25946	NIPBL	yes	GO:0000122(negative regulation of transcription by RNA polymerase II);GO:0000228(nuclear chromosome);GO:0000785(chromatin);GO:0000790(nuclear chromatin);GO:0001656(metanephros development);GO:0003007(heart morphogenesis);GO:0003151(outflow tract morphogenesis);GO:0003682(chromatin binding);GO:0005515(protein binding);GO:0005634(nucleus);GO:0005654(nucleoplasm);GO:0005694(chromosome);GO:0006302(do…	NA	K06672	NA	NIPBL, cohesin loading factor [Source:HGNC Symbol;Acc:HGNC:28862]	MSTRG.25945.3	j	chr5	36871364	36876700	MSTRG.25945	NIPBL-DT	yes	novel	cis	10K	NA	-0.334069
MSTRG.7116.1	u	chr12	47305465	47307899	MSTRG.7116	.	yes	NA	NA	NA	NA	NA	MSTRG.7116.1	u	chr12	47305465	47307899	MSTRG.7116	.	yes	novel	cis	1K	NA	1
MSTRG.34002.3	j	chrX	55143121	55161119	MSTRG.34002	FAM104B	yes	NA	NA	NA	NA	NA	MSTRG.34002.3	j	chrX	55143121	55161119	MSTRG.34002	FAM104B	yes	novel	cis	1K	NA	1
ENST00000477847	0	chrX	55145387	55161119	MSTRG.34002	FAM104B	yes	NA	NA	NA	NA	family with sequence similarity 104 member B [Source:HGNC Symbol;Acc:HGNC:25085]	MSTRG.34002.3	j	chrX	55143121	55161119	MSTRG.34002	FAM104B	yes	novel	cis	10K	NA	0.532793
MSTRG.23755.1	u	chr3	161685174	161746752	MSTRG.23755	.	yes	NA	NA	NA	NA	NA	MSTRG.23759.1	u	chr3	161783737	161786488	MSTRG.23759	.	yes	novel	cis	100K	NA	0.99335
MSTRG.23740.1	u	chr3	161879604	161881621	MSTRG.23740	.	yes	NA	NA	NA	NA	NA	MSTRG.23759.1	u	chr3	161783737	161786488	MSTRG.23759	.	yes	novel	cis	100K	NA	0.98409
MSTRG.23757.1	u	chr3	161750377	161778813	MSTRG.23757	.	yes	NA	NA	NA	NA	NA	MSTRG.23759.1	u	chr3	161783737	161786488	MSTRG.23759	.	yes	novel	cis	100K	NA	0.996445
MSTRG.23761.1	p	chr3	161809560	161816000	MSTRG.23761	AC131211	yes	NA	NA	NA	NA	NA	MSTRG.23759.1	u	chr3	161783737	161786488	MSTRG.23759	.	yes	novel	cis	100K	NA	0.980142
MSTRG.23758.1	u	chr3	161779346	161780824	MSTRG.23758	.	yes	NA	NA	NA	NA	NA	MSTRG.23759.1	u	chr3	161783737	161786488	MSTRG.23759	.	yes	novel	cis	10K	NA	0.92343
MSTRG.23763.1	u	chr3	161827581	161832576	MSTRG.23763	.	yes	NA	NA	NA	NA	NA	MSTRG.23759.1	u	chr3	161783737	161786488	MSTRG.23759	.	yes	novel	cis	100K	NA	0.990472
MSTRG.23737.1	u	chr3	161850626	161862405	MSTRG.23737	.	yes	NA	NA	NA	NA	NA	MSTRG.23759.1	u	chr3	161783737	161786488	MSTRG.23759	.	yes	novel	cis	100K	NA	0.993217
MSTRG.23760.1	u	chr3	161794455	161806123	MSTRG.23760	.	yes	NA	NA	NA	NA	NA	MSTRG.23759.1	u	chr3	161783737	161786488	MSTRG.23759	.	yes	novel	cis	100K	NA	0.986893
MSTRG.23759.1	u	chr3	161783737	161786488	MSTRG.23759	.	yes	NA	NA	NA	NA	NA	MSTRG.23759.1	u	chr3	161783737	161786488	MSTRG.23759	.	yes	novel	cis	1K	NA	1
MSTRG.23764.1	u	chr3	161836180	161840138	MSTRG.23764	.	yes	NA	NA	NA	NA	NA	MSTRG.23759.1	u	chr3	161783737	161786488	MSTRG.23759	.	yes	novel	cis	100K	NA	0.984574
MSTRG.23739.1	u	chr3	161869623	161870454	MSTRG.23739	.	yes	NA	NA	NA	NA	NA	MSTRG.23759.1	u	chr3	161783737	161786488	MSTRG.23759	.	yes	novel	cis	100K	NA	0.955057
MSTRG.28999.1	u	chr6	144923454	144929945	MSTRG.28999	.	yes	NA	NA	NA	NA	NA	MSTRG.28999.1	u	chr6	144923454	144929945	MSTRG.28999	.	yes	novel	cis	1K	NA	1
MSTRG.24911.12	j	chr4	89681523	89694119	MSTRG.24911	AC097478	yes	NA	NA	NA	NA	NA	MSTRG.24911.12	j	chr4	89681523	89694119	MSTRG.24911	AC097478	yes	novel	cis	1K	NA	1
ENST00000612706	0	chr4	89681523	89686704	MSTRG.24911	AC097478	yes	NA	NA	NA	NA	novel transcript	MSTRG.24911.12	j	chr4	89681523	89694119	MSTRG.24911	AC097478	yes	novel	cis	1K	NA	-0.521519
MSTRG.10276.20	j	chr14	104937255	104969967	MSTRG.10276	AHNAK2	yes	NA	NA	NA	NA	NA	MSTRG.10279.1	i	chr14	104944646	104952921	MSTRG.10279	AHNAK2	yes	novel	cis	10K	NA	0.753097
MSTRG.10276.17	j	chr14	104937255	104978305	MSTRG.10276	AHNAK2	yes	NA	NA	NA	NA	NA	MSTRG.10279.1	i	chr14	104944646	104952921	MSTRG.10279	AHNAK2	yes	novel	cis	10K	NA	0.44012
MSTRG.10279.1	i	chr14	104944646	104952921	MSTRG.10279	AHNAK2	yes	NA	NA	NA	NA	NA	MSTRG.10279.1	i	chr14	104944646	104952921	MSTRG.10279	AHNAK2	yes	novel	cis	1K	NA	1
MSTRG.10278.3	i	chr14	104943452	104949480	MSTRG.10278	AHNAK2	yes	NA	NA	NA	NA	NA	MSTRG.10279.1	i	chr14	104944646	104952921	MSTRG.10279	AHNAK2	yes	novel	cis	10K	NA	0.896758
MSTRG.10276.16	j	chr14	104937255	104978305	MSTRG.10276	AHNAK2	yes	NA	NA	NA	NA	NA	MSTRG.10279.1	i	chr14	104944646	104952921	MSTRG.10279	AHNAK2	yes	novel	cis	10K	NA	0.198975
MSTRG.10276.15	j	chr14	104937254	104970698	MSTRG.10276	AHNAK2	yes	NA	NA	NA	NA	NA	MSTRG.10279.1	i	chr14	104944646	104952921	MSTRG.10279	AHNAK2	yes	novel	cis	10K	NA	0.477748
MSTRG.10276.18	j	chr14	104937255	104978305	MSTRG.10276	AHNAK2	yes	NA	NA	NA	NA	NA	MSTRG.10279.1	i	chr14	104944646	104952921	MSTRG.10279	AHNAK2	yes	novel	cis	10K	NA	0.24617
ENST00000555544	0	chr14	104953537	104955402	MSTRG.10276	AHNAK2	yes	GO:0005515(protein binding);GO:0005634(nucleus);GO:0005737(cytoplasm);GO:0005829(cytosol);GO:0005886(plasma membrane);GO:0030018(Z disc);GO:0030315(T-tubule);GO:0030659(cytoplasmic vesicle membrane);GO:0042383(sarcolemma);GO:0043034(costamere);GO:0043484(regulation of RNA splicing)	NA	NA	NA	AHNAK nucleoprotein 2 [Source:HGNC Symbol;Acc:HGNC:20125]	MSTRG.10279.1	i	chr14	104944646	104952921	MSTRG.10279	AHNAK2	yes	novel	cis	10K	NA	0.826591
MSTRG.10278.5	i	chr14	104945636	104951975	MSTRG.10278	AHNAK2	yes	NA	NA	NA	NA	NA	MSTRG.10279.1	i	chr14	104944646	104952921	MSTRG.10279	AHNAK2	yes	novel	cis	1K	NA	0.638027
MSTRG.19539.3	i	chr2	182347507	182380101	MSTRG.19539	PDE1A	yes	NA	NA	NA	NA	NA	MSTRG.19539.3	i	chr2	182347507	182380101	MSTRG.19539	PDE1A	yes	novel	cis	1K	NA	1
MSTRG.1790.9	j	chr1	119149596	119184456	MSTRG.1790	WARS2-AS1	yes	NA	NA	NA	NA	NA	MSTRG.1790.9	j	chr1	119149596	119184456	MSTRG.1790	WARS2-AS1	yes	novel	cis	1K	NA	1
MSTRG.27292.1	o	chr5	179552195	179556167	MSTRG.27292	RUFY1	yes	NA	NA	NA	NA	NA	MSTRG.27292.1	o	chr5	179552195	179556167	MSTRG.27292	RUFY1	yes	novel	cis	1K	NA	1
MSTRG.27307.7	j	chr5	179614181	179623646	MSTRG.27307	HNRNPH1	yes	NA	NA	NA	NA	NA	MSTRG.27292.1	o	chr5	179552195	179556167	MSTRG.27292	RUFY1	yes	novel	cis	100K	NA	-0.238354
MSTRG.27286.1	u	chr5	179538439	179540956	MSTRG.27286	.	yes	NA	NA	NA	NA	NA	MSTRG.27292.1	o	chr5	179552195	179556167	MSTRG.27292	RUFY1	yes	novel	cis	100K	NA	-0.63908
MSTRG.21101.67	o	chr21	8401377	8446532	MSTRG.21101	FP236383	yes	NA	NA	NA	NA	NA	MSTRG.21101.67	o	chr21	8401377	8446532	MSTRG.21101	FP236383	yes	novel	cis	1K	NA	1
MSTRG.21101.1	o	chr21	8205942	8442701	MSTRG.21101	FP671120	yes	NA	NA	NA	NA	NA	MSTRG.21101.21	o	chr21	8209677	8260758	MSTRG.21101	FP671120	yes	novel	cis	10K	NA	0.462613
MSTRG.21098.18	o	chr21	8206428	8251839	MSTRG.21098	FP671120	yes	NA	NA	NA	NA	NA	MSTRG.21101.21	o	chr21	8209677	8260758	MSTRG.21101	FP671120	yes	novel	cis	10K	NA	-0.255213
MSTRG.21101.7	o	chr21	8205942	8437896	MSTRG.21101	FP671120	yes	NA	NA	NA	NA	NA	MSTRG.21101.21	o	chr21	8209677	8260758	MSTRG.21101	FP671120	yes	novel	cis	10K	NA	0.910434
MSTRG.21101.2	o	chr21	8205942	8444842	MSTRG.21101	FP671120	yes	NA	NA	NA	NA	NA	MSTRG.21101.21	o	chr21	8209677	8260758	MSTRG.21101	FP671120	yes	novel	cis	10K	NA	-0.0992387
MSTRG.21101.19	o	chr21	8206428	8442703	MSTRG.21101	FP671120	yes	NA	NA	NA	NA	NA	MSTRG.21101.21	o	chr21	8209677	8260758	MSTRG.21101	FP671120	yes	novel	cis	10K	NA	-0.314032
MSTRG.21101.21	o	chr21	8209677	8260758	MSTRG.21101	FP671120	yes	NA	NA	NA	NA	NA	MSTRG.21101.21	o	chr21	8209677	8260758	MSTRG.21101	FP671120	yes	novel	cis	1K	NA	1
MSTRG.21098.14	o	chr21	8206397	8435553	MSTRG.21098	FP236383	yes	NA	NA	NA	NA	NA	MSTRG.21101.21	o	chr21	8209677	8260758	MSTRG.21101	FP671120	yes	novel	cis	10K	NA	0.28
MSTRG.21098.36	o	chr21	8209686	8254215	MSTRG.21098	FP671120	yes	NA	NA	NA	NA	NA	MSTRG.21101.21	o	chr21	8209677	8260758	MSTRG.21101	FP671120	yes	novel	cis	1K	NA	-0.308191
MSTRG.23740.1	u	chr3	161879604	161881621	MSTRG.23740	.	yes	NA	NA	NA	NA	NA	MSTRG.23764.1	u	chr3	161836180	161840138	MSTRG.23764	.	yes	novel	cis	100K	NA	0.982042
MSTRG.23757.1	u	chr3	161750377	161778813	MSTRG.23757	.	yes	NA	NA	NA	NA	NA	MSTRG.23764.1	u	chr3	161836180	161840138	MSTRG.23764	.	yes	novel	cis	100K	NA	0.98792
MSTRG.23765.1	u	chr3	161888415	161891838	MSTRG.23765	.	yes	NA	NA	NA	NA	NA	MSTRG.23764.1	u	chr3	161836180	161840138	MSTRG.23764	.	yes	novel	cis	100K	NA	0.898597
MSTRG.23761.1	p	chr3	161809560	161816000	MSTRG.23761	AC131211	yes	NA	NA	NA	NA	NA	MSTRG.23764.1	u	chr3	161836180	161840138	MSTRG.23764	.	yes	novel	cis	100K	NA	0.949691
MSTRG.23758.1	u	chr3	161779346	161780824	MSTRG.23758	.	yes	NA	NA	NA	NA	NA	MSTRG.23764.1	u	chr3	161836180	161840138	MSTRG.23764	.	yes	novel	cis	100K	NA	0.945876
MSTRG.23763.1	u	chr3	161827581	161832576	MSTRG.23763	.	yes	NA	NA	NA	NA	NA	MSTRG.23764.1	u	chr3	161836180	161840138	MSTRG.23764	.	yes	novel	cis	10K	NA	0.976734
MSTRG.23737.1	u	chr3	161850626	161862405	MSTRG.23737	.	yes	NA	NA	NA	NA	NA	MSTRG.23764.1	u	chr3	161836180	161840138	MSTRG.23764	.	yes	novel	cis	100K	NA	0.997283
MSTRG.23760.1	u	chr3	161794455	161806123	MSTRG.23760	.	yes	NA	NA	NA	NA	NA	MSTRG.23764.1	u	chr3	161836180	161840138	MSTRG.23764	.	yes	novel	cis	100K	NA	0.986775
MSTRG.23759.1	u	chr3	161783737	161786488	MSTRG.23759	.	yes	NA	NA	NA	NA	NA	MSTRG.23764.1	u	chr3	161836180	161840138	MSTRG.23764	.	yes	novel	cis	100K	NA	0.984574
MSTRG.23764.1	u	chr3	161836180	161840138	MSTRG.23764	.	yes	NA	NA	NA	NA	NA	MSTRG.23764.1	u	chr3	161836180	161840138	MSTRG.23764	.	yes	novel	cis	1K	NA	1
MSTRG.23739.1	u	chr3	161869623	161870454	MSTRG.23739	.	yes	NA	NA	NA	NA	NA	MSTRG.23764.1	u	chr3	161836180	161840138	MSTRG.23764	.	yes	novel	cis	100K	NA	0.978074
MSTRG.4638.1	u	chr10	130766153	130770843	MSTRG.4638	.	yes	NA	NA	NA	NA	NA	MSTRG.4638.1	u	chr10	130766153	130770843	MSTRG.4638	.	yes	novel	cis	1K	NA	1
ENST00000332830	0	chr17	28905250	28951518	MSTRG.13973	PHF12	yes	GO:0000122(negative regulation of transcription by RNA polymerase II);GO:0001222(transcription corepressor binding);GO:0003714(transcription corepressor activity);GO:0005515(protein binding);GO:0005634(nucleus);GO:0005654(nucleoplasm);GO:0016580(Sin3 complex);GO:0017053(transcriptional repressor complex);GO:0035091(phosphatidylinositol binding);GO:0045892(negative regulation of transcription, DNA…	NA	NA	NA	PHD finger protein 12 [Source:HGNC Symbol;Acc:HGNC:20816]	MSTRG.13970.5	j	chr17	28901112	28903071	MSTRG.13970	DHRS13	yes	novel	cis	10K	NA	-0.353858
MSTRG.13970.5	j	chr17	28901112	28903071	MSTRG.13970	DHRS13	yes	NA	NA	NA	NA	NA	MSTRG.13970.5	j	chr17	28901112	28903071	MSTRG.13970	DHRS13	yes	novel	cis	1K	NA	1
MSTRG.7699.1	i	chr12	74364699	74366488	MSTRG.7699	AC090502	yes	NA	NA	NA	NA	NA	MSTRG.7699.1	i	chr12	74364699	74366488	MSTRG.7699	AC090502	yes	novel	cis	1K	NA	1
MSTRG.7701.1	i	chr12	74389769	74392232	MSTRG.7701	AC090502	yes	NA	NA	NA	NA	NA	MSTRG.7699.1	i	chr12	74364699	74366488	MSTRG.7699	AC090502	yes	novel	cis	100K	NA	0.983895
MSTRG.7700.1	i	chr12	74373282	74374071	MSTRG.7700	AC090502	yes	NA	NA	NA	NA	NA	MSTRG.7699.1	i	chr12	74364699	74366488	MSTRG.7699	AC090502	yes	novel	cis	10K	NA	0.945915
MSTRG.7702.1	i	chr12	74398221	74399355	MSTRG.7702	AC090502	yes	NA	NA	NA	NA	NA	MSTRG.7699.1	i	chr12	74364699	74366488	MSTRG.7699	AC090502	yes	novel	cis	100K	NA	0.881769
MSTRG.17920.1	u	chr2	16793102	16793375	MSTRG.17920	.	yes	NA	NA	NA	NA	NA	MSTRG.17920.1	u	chr2	16793102	16793375	MSTRG.17920	.	yes	novel	cis	1K	NA	1
MSTRG.7699.1	i	chr12	74364699	74366488	MSTRG.7699	AC090502	yes	NA	NA	NA	NA	NA	MSTRG.7701.1	i	chr12	74389769	74392232	MSTRG.7701	AC090502	yes	novel	cis	100K	NA	0.983895
MSTRG.7701.1	i	chr12	74389769	74392232	MSTRG.7701	AC090502	yes	NA	NA	NA	NA	NA	MSTRG.7701.1	i	chr12	74389769	74392232	MSTRG.7701	AC090502	yes	novel	cis	1K	NA	1
MSTRG.7700.1	i	chr12	74373282	74374071	MSTRG.7700	AC090502	yes	NA	NA	NA	NA	NA	MSTRG.7701.1	i	chr12	74389769	74392232	MSTRG.7701	AC090502	yes	novel	cis	100K	NA	0.956011
MSTRG.7702.1	i	chr12	74398221	74399355	MSTRG.7702	AC090502	yes	NA	NA	NA	NA	NA	MSTRG.7701.1	i	chr12	74389769	74392232	MSTRG.7701	AC090502	yes	novel	cis	10K	NA	0.882123
MSTRG.25296.4	j	chr4	139336873	139391368	MSTRG.25296	NAA15	yes	NA	NA	NA	NA	NA	MSTRG.25295.10	j	chr4	139289953	139301389	MSTRG.25295	NDUFC1	yes	novel	cis	100K	NA	0.423812
MSTRG.25295.10	j	chr4	139289953	139301389	MSTRG.25295	NDUFC1	yes	NA	NA	NA	NA	NA	MSTRG.25295.10	j	chr4	139289953	139301389	MSTRG.25295	NDUFC1	yes	novel	cis	1K	NA	1
ENST00000566025	c	chr13	31952580	31953361	MSTRG.8559	EEF1DP3	yes	NA	NA	NA	NA	eukaryotic translation elongation factor 1 delta pseudogene 3 [Source:HGNC Symbol;Acc:HGNC:30486]	MSTRG.8560.1	i	chr13	31954969	31956248	MSTRG.8560	FRY	yes	novel	cis	10K	NA	0.856375
MSTRG.8561.1	i	chr13	31957713	31958548	MSTRG.8561	FRY	yes	NA	NA	NA	NA	NA	MSTRG.8560.1	i	chr13	31954969	31956248	MSTRG.8560	FRY	yes	novel	cis	10K	NA	0.984747
ENST00000624392	0	chr13	31960325	31961946	MSTRG.8562	AC002525	yes	NA	NA	NA	NA	TEC	MSTRG.8560.1	i	chr13	31954969	31956248	MSTRG.8560	FRY	yes	novel	cis	10K	NA	0.903139
ENST00000647500	0	chr13	31945826	32299105	MSTRG.8559	FRY	yes	GO:0000902(cell morphogenesis);GO:0000922(spindle pole);GO:0004857(enzyme inhibitor activity);GO:0005737(cytoplasm);GO:0005815(microtubule organizing center);GO:0005856(cytoskeleton);GO:0005938(cell cortex);GO:0031175(neuron projection development);GO:0043086(negative regulation of catalytic activity);GO:1904428(negative regulation of tubulin deacetylation)	NA	NA	NA	FRY microtubule binding protein [Source:HGNC Symbol;Acc:HGNC:20367]	MSTRG.8560.1	i	chr13	31954969	31956248	MSTRG.8560	FRY	yes	novel	cis	10K	NA	0.582261
MSTRG.8560.1	i	chr13	31954969	31956248	MSTRG.8560	FRY	yes	NA	NA	NA	NA	NA	MSTRG.8560.1	i	chr13	31954969	31956248	MSTRG.8560	FRY	yes	novel	cis	1K	NA	1
ENST00000490410	0	chr13	31950159	31953441	MSTRG.8559	FRY	yes	GO:0000902(cell morphogenesis);GO:0000922(spindle pole);GO:0004857(enzyme inhibitor activity);GO:0005737(cytoplasm);GO:0005815(microtubule organizing center);GO:0005856(cytoskeleton);GO:0005938(cell cortex);GO:0031175(neuron projection development);GO:0043086(negative regulation of catalytic activity);GO:1904428(negative regulation of tubulin deacetylation)	NA	NA	NA	FRY microtubule binding protein [Source:HGNC Symbol;Acc:HGNC:20367]	MSTRG.8560.1	i	chr13	31954969	31956248	MSTRG.8560	FRY	yes	novel	cis	10K	NA	0.897974
MSTRG.13193.2	j	chr16	86474529	86478881	MSTRG.13193	FENDRR	yes	NA	NA	NA	NA	NA	MSTRG.13194.1	i	chr16	86479092	86482594	MSTRG.13194	FENDRR	yes	novel	cis	10K	NA	0.828678
ENST00000599749	0	chr16	86487737	86509099	MSTRG.13193	FENDRR	yes	NA	NA	NA	NA	FOXF1 adjacent non-coding developmental regulatory RNA [Source:HGNC Symbol;Acc:HGNC:43894]	MSTRG.13194.1	i	chr16	86479092	86482594	MSTRG.13194	FENDRR	yes	novel	cis	10K	NA	0.76168
ENST00000595886	0	chr16	86474529	86508860	MSTRG.13193	FENDRR	yes	NA	NA	NA	NA	FOXF1 adjacent non-coding developmental regulatory RNA [Source:HGNC Symbol;Acc:HGNC:43894]	MSTRG.13194.1	i	chr16	86479092	86482594	MSTRG.13194	FENDRR	yes	novel	cis	10K	NA	0.311579
MSTRG.13194.1	i	chr16	86479092	86482594	MSTRG.13194	FENDRR	yes	NA	NA	NA	NA	NA	MSTRG.13194.1	i	chr16	86479092	86482594	MSTRG.13194	FENDRR	yes	novel	cis	1K	NA	1
ENST00000598996	0	chr16	86487706	86490879	MSTRG.13193	FENDRR	yes	NA	NA	NA	NA	FOXF1 adjacent non-coding developmental regulatory RNA [Source:HGNC Symbol;Acc:HGNC:43894]	MSTRG.13194.1	i	chr16	86479092	86482594	MSTRG.13194	FENDRR	yes	novel	cis	10K	NA	0.331292
ENST00000593604	0	chr16	86490268	86508877	MSTRG.13193	FENDRR	yes	NA	NA	NA	NA	FOXF1 adjacent non-coding developmental regulatory RNA [Source:HGNC Symbol;Acc:HGNC:43894]	MSTRG.13194.1	i	chr16	86479092	86482594	MSTRG.13194	FENDRR	yes	novel	cis	100K	NA	0.946577
MSTRG.13193.9	j	chr16	86490226	86508877	MSTRG.13193	FENDRR	yes	NA	NA	NA	NA	NA	MSTRG.13194.1	i	chr16	86479092	86482594	MSTRG.13194	FENDRR	yes	novel	cis	100K	NA	0.798686
MSTRG.8382.2	j	chr12	131929223	131945896	MSTRG.8382	PUS1	yes	NA	NA	NA	NA	NA	MSTRG.8377.2	j	chr12	131861184	131864438	MSTRG.8377	AC131009	yes	novel	cis	100K	NA	0.75686
ENST00000360564	0	chr12	131828393	131851771	MSTRG.8378	MMP17	yes	GO:0001822(kidney development);GO:0004222(metalloendopeptidase activity);GO:0005576(extracellular region);GO:0005615(extracellular space);GO:0005886(plasma membrane);GO:0006508(proteolysis);GO:0008047(enzyme activator activity);GO:0008233(peptidase activity);GO:0008237(metallopeptidase activity);GO:0008270(zinc ion binding);GO:0016020(membrane);GO:0016787(hydrolase activity);GO:0030198(extracellu…	04928(Parathyroid hormone synthesis, secretion and action)	K07997	EC:3.4.24.-	matrix metallopeptidase 17 [Source:HGNC Symbol;Acc:HGNC:7163]	MSTRG.8377.2	j	chr12	131861184	131864438	MSTRG.8377	AC131009	yes	novel	cis	100K	NA	0.562867
ENST00000545790	0	chr12	131828540	131840747	MSTRG.8378	MMP17	yes	GO:0001822(kidney development);GO:0004222(metalloendopeptidase activity);GO:0005576(extracellular region);GO:0005615(extracellular space);GO:0005886(plasma membrane);GO:0006508(proteolysis);GO:0008047(enzyme activator activity);GO:0008233(peptidase activity);GO:0008237(metallopeptidase activity);GO:0008270(zinc ion binding);GO:0016020(membrane);GO:0016787(hydrolase activity);GO:0030198(extracellu…	04928(Parathyroid hormone synthesis, secretion and action)	K07997	EC:3.4.24.-	matrix metallopeptidase 17 [Source:HGNC Symbol;Acc:HGNC:7163]	MSTRG.8377.2	j	chr12	131861184	131864438	MSTRG.8377	AC131009	yes	novel	cis	100K	NA	0.928511
MSTRG.8377.2	j	chr12	131861184	131864438	MSTRG.8377	AC131009	yes	NA	NA	NA	NA	NA	MSTRG.8377.2	j	chr12	131861184	131864438	MSTRG.8377	AC131009	yes	novel	cis	1K	NA	1
ENST00000321867	0	chr12	131894622	131923150	MSTRG.8379	ULK1	yes	GO:0000045(autophagosome assembly);GO:0000166(nucleotide binding);GO:0000407(phagophore assembly site);GO:0004672(protein kinase activity);GO:0004674(protein serine/threonine kinase activity);GO:0005515(protein binding);GO:0005524(ATP binding);GO:0005737(cytoplasm);GO:0005741(mitochondrial outer membrane);GO:0005776(autophagosome);GO:0005789(endoplasmic reticulum membrane);GO:0005829(cytosol);GO:…	04137(Mitophagy - animal);04140(Autophagy - animal);04150(mTOR signaling pathway);04152(AMPK signaling pathway);04211(Longevity regulating pathway)	NA	NA	unc-51 like autophagy activating kinase 1 [Source:HGNC Symbol;Acc:HGNC:12558]	MSTRG.8377.2	j	chr12	131861184	131864438	MSTRG.8377	AC131009	yes	novel	cis	100K	NA	0.796914
MSTRG.8378.3	j	chr12	131828540	131851332	MSTRG.8378	MMP17	yes	NA	NA	NA	NA	NA	MSTRG.8377.2	j	chr12	131861184	131864438	MSTRG.8377	AC131009	yes	novel	cis	100K	NA	0.715502
MSTRG.8383.5	j	chr12	131949971	132080457	MSTRG.8383	EP400	yes	NA	NA	NA	NA	NA	MSTRG.8377.2	j	chr12	131861184	131864438	MSTRG.8377	AC131009	yes	novel	cis	100K	NA	0.701104
MSTRG.5406.1	x	chr11	62026994	62086817	MSTRG.5406	AP003733	yes	NA	NA	NA	NA	NA	MSTRG.5406.1	x	chr11	62026994	62086817	MSTRG.5406	AP003733	yes	novel	cis	1K	NA	1
MSTRG.5407.1	u	chr11	62029962	62030728	MSTRG.5407	.	yes	NA	NA	NA	NA	NA	MSTRG.5406.1	x	chr11	62026994	62086817	MSTRG.5406	AP003733	yes	novel	cis	10K	NA	0.732765
MSTRG.5408.1	u	chr11	62033223	62035024	MSTRG.5408	.	yes	NA	NA	NA	NA	NA	MSTRG.5406.1	x	chr11	62026994	62086817	MSTRG.5406	AP003733	yes	novel	cis	10K	NA	0.73436
ENST00000587806	0	chr19	11553047	11555467	MSTRG.16549	ELOF1	yes	GO:0000993(RNA polymerase II complex binding);GO:0003746(translation elongation factor activity);GO:0005515(protein binding);GO:0005634(nucleus);GO:0006368(transcription elongation from RNA polymerase II promoter);GO:0006414(translational elongation);GO:0008023(transcription elongation factor complex);GO:0046872(metal ion binding);GO:0048096(chromatin-mediated maintenance of transcription)	NA	NA	NA	elongation factor 1 homolog [Source:HGNC Symbol;Acc:HGNC:28691]	MSTRG.16549.3	j	chr19	11553043	11559236	MSTRG.16549	ELOF1	yes	novel	cis	1K	NA	-0.467595
MSTRG.16549.6	j	chr19	11553047	11559236	MSTRG.16549	ELOF1	yes	NA	NA	NA	NA	NA	MSTRG.16549.3	j	chr19	11553043	11559236	MSTRG.16549	ELOF1	yes	novel	cis	1K	NA	-0.397535
MSTRG.16549.3	j	chr19	11553043	11559236	MSTRG.16549	ELOF1	yes	NA	NA	NA	NA	NA	MSTRG.16549.3	j	chr19	11553043	11559236	MSTRG.16549	ELOF1	yes	novel	cis	1K	NA	1
MSTRG.16549.2	j	chr19	11553043	11559230	MSTRG.16549	ELOF1	yes	NA	NA	NA	NA	NA	MSTRG.16549.3	j	chr19	11553043	11559236	MSTRG.16549	ELOF1	yes	novel	cis	1K	NA	0.877658
MSTRG.27194.1	i	chr5	174338789	174341925	MSTRG.27194	LINC01411	yes	NA	NA	NA	NA	NA	MSTRG.27194.1	i	chr5	174338789	174341925	MSTRG.27194	LINC01411	yes	novel	cis	1K	NA	1
ENST00000507361	0	chr5	174336354	174529982	MSTRG.27193	LINC01411	yes	NA	NA	NA	NA	long intergenic non-protein coding RNA 1411 [Source:HGNC Symbol;Acc:HGNC:50703]	MSTRG.27194.1	i	chr5	174338789	174341925	MSTRG.27194	LINC01411	yes	novel	cis	10K	NA	0.787544
MSTRG.27193.1	j	chr5	174336231	174362711	MSTRG.27193	LINC01411	yes	NA	NA	NA	NA	NA	MSTRG.27194.1	i	chr5	174338789	174341925	MSTRG.27194	LINC01411	yes	novel	cis	10K	NA	0.798161
MSTRG.27195.1	i	chr5	174356839	174357641	MSTRG.27195	LINC01411	yes	NA	NA	NA	NA	NA	MSTRG.27194.1	i	chr5	174338789	174341925	MSTRG.27194	LINC01411	yes	novel	cis	100K	NA	0.821809
MSTRG.5406.1	x	chr11	62026994	62086817	MSTRG.5406	AP003733	yes	NA	NA	NA	NA	NA	MSTRG.5407.1	u	chr11	62029962	62030728	MSTRG.5407	.	yes	novel	cis	10K	NA	0.732765
MSTRG.5407.1	u	chr11	62029962	62030728	MSTRG.5407	.	yes	NA	NA	NA	NA	NA	MSTRG.5407.1	u	chr11	62029962	62030728	MSTRG.5407	.	yes	novel	cis	1K	NA	1
MSTRG.5408.1	u	chr11	62033223	62035024	MSTRG.5408	.	yes	NA	NA	NA	NA	NA	MSTRG.5407.1	u	chr11	62029962	62030728	MSTRG.5407	.	yes	novel	cis	10K	NA	0.885927
MSTRG.27018.5	j	chr5	148238335	148286210	MSTRG.27018	SPINK13	yes	NA	NA	NA	NA	NA	MSTRG.27018.8	j	chr5	148268794	148282364	MSTRG.27018	SPINK13	yes	novel	cis	100K	NA	0.49642
ENST00000511106	0	chr5	148268860	148286210	MSTRG.27018	SPINK13	yes	GO:0004867(serine-type endopeptidase inhibitor activity);GO:0005515(protein binding);GO:0005576(extracellular region);GO:0010466(negative regulation of peptidase activity);GO:0010951(negative regulation of endopeptidase activity);GO:0030414(peptidase inhibitor activity);GO:1902225(negative regulation of acrosome reaction)	NA	K19924	NA	serine peptidase inhibitor, Kazal type 13 (putative) [Source:HGNC Symbol;Acc:HGNC:27200]	MSTRG.27018.8	j	chr5	148268794	148282364	MSTRG.27018	SPINK13	yes	novel	cis	1K	NA	0.959083
ENST00000398450	0	chr5	148268794	148286255	MSTRG.27018	SPINK13	yes	GO:0004867(serine-type endopeptidase inhibitor activity);GO:0005515(protein binding);GO:0005576(extracellular region);GO:0010466(negative regulation of peptidase activity);GO:0010951(negative regulation of endopeptidase activity);GO:0030414(peptidase inhibitor activity);GO:1902225(negative regulation of acrosome reaction)	NA	K19924	NA	serine peptidase inhibitor, Kazal type 13 (putative) [Source:HGNC Symbol;Acc:HGNC:27200]	MSTRG.27018.8	j	chr5	148268794	148282364	MSTRG.27018	SPINK13	yes	novel	cis	1K	NA	0.874065
MSTRG.27018.8	j	chr5	148268794	148282364	MSTRG.27018	SPINK13	yes	NA	NA	NA	NA	NA	MSTRG.27018.8	j	chr5	148268794	148282364	MSTRG.27018	SPINK13	yes	novel	cis	1K	NA	1
MSTRG.27019.2	e	chr5	148282183	148285929	MSTRG.27019	AC091948	yes	NA	NA	NA	NA	NA	MSTRG.27018.8	j	chr5	148268794	148282364	MSTRG.27018	SPINK13	yes	novel	cis	100K	NA	0.969319
ENST00000638089	0	chr5	148238572	148243580	MSTRG.27018	MARCOL	yes	NA	NA	NA	NA	MARCO like [Source:HGNC Symbol;Acc:HGNC:53644]	MSTRG.27018.8	j	chr5	148268794	148282364	MSTRG.27018	SPINK13	yes	novel	cis	100K	NA	0.848452
MSTRG.13195.1	i	chr16	86503892	86505673	MSTRG.13195	FENDRR	yes	NA	NA	NA	NA	NA	MSTRG.13195.1	i	chr16	86503892	86505673	MSTRG.13195	FENDRR	yes	novel	cis	1K	NA	1
MSTRG.24438.1	u	chr4	24323536	24399534	MSTRG.24438	.	yes	NA	NA	NA	NA	NA	MSTRG.24438.1	u	chr4	24323536	24399534	MSTRG.24438	.	yes	novel	cis	1K	NA	1
ENST00000613358	0	chr4	128269237	128288822	MSTRG.25229	PGRMC2	yes	GO:0003707(steroid hormone receptor activity);GO:0005496(steroid binding);GO:0005515(protein binding);GO:0005635(nuclear envelope);GO:0008289(lipid binding);GO:0016020(membrane);GO:0016021(integral component of membrane);GO:0043401(steroid hormone mediated signaling pathway)	NA	K17278	NA	progesterone receptor membrane component 2 [Source:HGNC Symbol;Acc:HGNC:16089]	MSTRG.25233.1	i	chr4	128314481	128319515	MSTRG.25233	LINC02615	yes	novel	cis	100K	NA	0.467808
ENST00000503588	0	chr4	128270871	128286787	MSTRG.25229	PGRMC2	yes	GO:0003707(steroid hormone receptor activity);GO:0005496(steroid binding);GO:0005515(protein binding);GO:0005635(nuclear envelope);GO:0008289(lipid binding);GO:0016020(membrane);GO:0016021(integral component of membrane);GO:0043401(steroid hormone mediated signaling pathway)	NA	K17278	NA	progesterone receptor membrane component 2 [Source:HGNC Symbol;Acc:HGNC:16089]	MSTRG.25233.1	i	chr4	128314481	128319515	MSTRG.25233	LINC02615	yes	novel	cis	100K	NA	0.852135
ENST00000394276	0	chr4	128269256	128273061	MSTRG.25229	PGRMC2	yes	GO:0003707(steroid hormone receptor activity);GO:0005496(steroid binding);GO:0005515(protein binding);GO:0005635(nuclear envelope);GO:0008289(lipid binding);GO:0016020(membrane);GO:0016021(integral component of membrane);GO:0043401(steroid hormone mediated signaling pathway)	NA	K17278	NA	progesterone receptor membrane component 2 [Source:HGNC Symbol;Acc:HGNC:16089]	MSTRG.25233.1	i	chr4	128314481	128319515	MSTRG.25233	LINC02615	yes	novel	cis	100K	NA	0.919962
MSTRG.25233.1	i	chr4	128314481	128319515	MSTRG.25233	LINC02615	yes	NA	NA	NA	NA	NA	MSTRG.25233.1	i	chr4	128314481	128319515	MSTRG.25233	LINC02615	yes	novel	cis	1K	NA	1
MSTRG.25231.1	i	chr4	128295572	128299463	MSTRG.25231	LINC02615	yes	NA	NA	NA	NA	NA	MSTRG.25233.1	i	chr4	128314481	128319515	MSTRG.25233	LINC02615	yes	novel	cis	100K	NA	0.972688
MSTRG.25230.1	j	chr4	128287559	128310675	MSTRG.25230	LINC02615	yes	NA	NA	NA	NA	NA	MSTRG.25233.1	i	chr4	128314481	128319515	MSTRG.25233	LINC02615	yes	novel	cis	100K	NA	0.931951
MSTRG.4818.1	o	chr11	4136803	4137956	MSTRG.4818	RRM1-AS1	yes	NA	NA	NA	NA	NA	MSTRG.4818.1	o	chr11	4136803	4137956	MSTRG.4818	RRM1-AS1	yes	novel	cis	1K	NA	1
MSTRG.16940.4	i	chr19	23549693	23558885	MSTRG.16940	ZNF675	yes	NA	NA	NA	NA	NA	MSTRG.16940.4	i	chr19	23549693	23558885	MSTRG.16940	ZNF675	yes	novel	cis	1K	NA	1
MSTRG.29732.4	j	chr7	45723788	45769022	MSTRG.29732	SEPT7P2	yes	NA	NA	NA	NA	NA	MSTRG.29732.4	j	chr7	45723788	45769022	MSTRG.29732	SEPT7P2	yes	novel	cis	1K	NA	1
MSTRG.16892.1	u	chr19	21858445	21867436	MSTRG.16892	.	yes	NA	NA	NA	NA	NA	MSTRG.16892.1	u	chr19	21858445	21867436	MSTRG.16892	.	yes	novel	cis	1K	NA	1
MSTRG.27371.1	u	chr6	1419246	1424011	MSTRG.27371	.	yes	NA	NA	NA	NA	NA	MSTRG.27371.1	u	chr6	1419246	1424011	MSTRG.27371	.	yes	novel	cis	1K	NA	1
MSTRG.23740.1	u	chr3	161879604	161881621	MSTRG.23740	.	yes	NA	NA	NA	NA	NA	MSTRG.23739.1	u	chr3	161869623	161870454	MSTRG.23739	.	yes	novel	cis	10K	NA	0.925819
MSTRG.23765.1	u	chr3	161888415	161891838	MSTRG.23765	.	yes	NA	NA	NA	NA	NA	MSTRG.23739.1	u	chr3	161869623	161870454	MSTRG.23739	.	yes	novel	cis	100K	NA	0.866004
MSTRG.23761.1	p	chr3	161809560	161816000	MSTRG.23761	AC131211	yes	NA	NA	NA	NA	NA	MSTRG.23739.1	u	chr3	161869623	161870454	MSTRG.23739	.	yes	novel	cis	100K	NA	0.939112
MSTRG.23758.1	u	chr3	161779346	161780824	MSTRG.23758	.	yes	NA	NA	NA	NA	NA	MSTRG.23739.1	u	chr3	161869623	161870454	MSTRG.23739	.	yes	novel	cis	100K	NA	0.976882
MSTRG.23763.1	u	chr3	161827581	161832576	MSTRG.23763	.	yes	NA	NA	NA	NA	NA	MSTRG.23739.1	u	chr3	161869623	161870454	MSTRG.23739	.	yes	novel	cis	100K	NA	0.932447
MSTRG.23737.1	u	chr3	161850626	161862405	MSTRG.23737	.	yes	NA	NA	NA	NA	NA	MSTRG.23739.1	u	chr3	161869623	161870454	MSTRG.23739	.	yes	novel	cis	100K	NA	0.973042
MSTRG.23760.1	u	chr3	161794455	161806123	MSTRG.23760	.	yes	NA	NA	NA	NA	NA	MSTRG.23739.1	u	chr3	161869623	161870454	MSTRG.23739	.	yes	novel	cis	100K	NA	0.970759
MSTRG.23759.1	u	chr3	161783737	161786488	MSTRG.23759	.	yes	NA	NA	NA	NA	NA	MSTRG.23739.1	u	chr3	161869623	161870454	MSTRG.23739	.	yes	novel	cis	100K	NA	0.955057
MSTRG.23764.1	u	chr3	161836180	161840138	MSTRG.23764	.	yes	NA	NA	NA	NA	NA	MSTRG.23739.1	u	chr3	161869623	161870454	MSTRG.23739	.	yes	novel	cis	100K	NA	0.978074
MSTRG.23739.1	u	chr3	161869623	161870454	MSTRG.23739	.	yes	NA	NA	NA	NA	NA	MSTRG.23739.1	u	chr3	161869623	161870454	MSTRG.23739	.	yes	novel	cis	1K	NA	1
ENST00000502994	0	chr5	36249333	36301900	MSTRG.25925	RANBP3L	yes	GO:0005096(GTPase activator activity);GO:0005634(nucleus);GO:0005643(nuclear pore);GO:0005737(cytoplasm);GO:0006611(protein export from nucleus);GO:0008536(Ran GTPase binding);GO:0043547(positive regulation of GTPase activity);GO:0045663(positive regulation of myoblast differentiation);GO:0045668(negative regulation of osteoblast differentiation);GO:0046332(SMAD binding);GO:0046907(intracellular …	NA	NA	NA	RAN binding protein 3 like [Source:HGNC Symbol;Acc:HGNC:26353]	MSTRG.25925.5	j	chr5	36283556	36301900	MSTRG.25925	RANBP3L	yes	novel	cis	100K	NA	0.598878
ENST00000296604	0	chr5	36248434	36301902	MSTRG.25925	RANBP3L	yes	GO:0005096(GTPase activator activity);GO:0005634(nucleus);GO:0005643(nuclear pore);GO:0005737(cytoplasm);GO:0006611(protein export from nucleus);GO:0008536(Ran GTPase binding);GO:0043547(positive regulation of GTPase activity);GO:0045663(positive regulation of myoblast differentiation);GO:0045668(negative regulation of osteoblast differentiation);GO:0046332(SMAD binding);GO:0046907(intracellular …	NA	NA	NA	RAN binding protein 3 like [Source:HGNC Symbol;Acc:HGNC:26353]	MSTRG.25925.5	j	chr5	36283556	36301900	MSTRG.25925	RANBP3L	yes	novel	cis	100K	NA	0.93968
ENST00000515759	0	chr5	36256796	36301900	MSTRG.25925	RANBP3L	yes	GO:0005096(GTPase activator activity);GO:0005634(nucleus);GO:0005643(nuclear pore);GO:0005737(cytoplasm);GO:0006611(protein export from nucleus);GO:0008536(Ran GTPase binding);GO:0043547(positive regulation of GTPase activity);GO:0045663(positive regulation of myoblast differentiation);GO:0045668(negative regulation of osteoblast differentiation);GO:0046332(SMAD binding);GO:0046907(intracellular …	NA	NA	NA	RAN binding protein 3 like [Source:HGNC Symbol;Acc:HGNC:26353]	MSTRG.25925.5	j	chr5	36283556	36301900	MSTRG.25925	RANBP3L	yes	novel	cis	100K	NA	0.764745
MSTRG.25925.5	j	chr5	36283556	36301900	MSTRG.25925	RANBP3L	yes	NA	NA	NA	NA	NA	MSTRG.25925.5	j	chr5	36283556	36301900	MSTRG.25925	RANBP3L	yes	novel	cis	1K	NA	1
MSTRG.8843.3	j	chr13	67101018	67156931	MSTRG.8843	AL160254	yes	NA	NA	NA	NA	NA	MSTRG.8843.3	j	chr13	67101018	67156931	MSTRG.8843	AL160254	yes	novel	cis	1K	NA	1
MSTRG.8844.1	i	chr13	67105754	67116243	MSTRG.8844	PCDH9	yes	NA	NA	NA	NA	NA	MSTRG.8843.3	j	chr13	67101018	67156931	MSTRG.8843	AL160254	yes	novel	cis	10K	NA	0.926506
MSTRG.8843.4	o	chr13	67116317	67141670	MSTRG.8843	AL160254	yes	NA	NA	NA	NA	NA	MSTRG.8843.3	j	chr13	67101018	67156931	MSTRG.8843	AL160254	yes	novel	cis	100K	NA	0.956642
MSTRG.8843.1	o	chr13	67100932	67157258	MSTRG.8843	AL160254	yes	NA	NA	NA	NA	NA	MSTRG.8843.3	j	chr13	67101018	67156931	MSTRG.8843	AL160254	yes	novel	cis	1K	NA	0.984673
MSTRG.23453.1	u	chr3	134325848	134326529	MSTRG.23453	.	yes	NA	NA	NA	NA	NA	MSTRG.23453.1	u	chr3	134325848	134326529	MSTRG.23453	.	yes	novel	cis	1K	NA	1
ENST00000422605	0	chr3	134355877	134374447	MSTRG.23465	AMOTL2	yes	GO:0001525(angiogenesis);GO:0003365(establishment of cell polarity involved in ameboidal cell migration);GO:0005515(protein binding);GO:0005768(endosome);GO:0005829(cytosol);GO:0005923(bicellular tight junction);GO:0016055(Wnt signaling pathway);GO:0016324(apical plasma membrane);GO:0030036(actin cytoskeleton organization);GO:0030334(regulation of cell migration);GO:0031410(cytoplasmic vesicle);G…	04530(Tight junction)	K06104	NA	angiomotin like 2 [Source:HGNC Symbol;Acc:HGNC:17812]	MSTRG.23453.1	u	chr3	134325848	134326529	MSTRG.23453	.	yes	novel	cis	100K	NA	0.951533
ENST00000506326	0	chr3	134356185	134366841	MSTRG.23465	AMOTL2	yes	GO:0001525(angiogenesis);GO:0003365(establishment of cell polarity involved in ameboidal cell migration);GO:0005515(protein binding);GO:0005768(endosome);GO:0005829(cytosol);GO:0005923(bicellular tight junction);GO:0016055(Wnt signaling pathway);GO:0016324(apical plasma membrane);GO:0030036(actin cytoskeleton organization);GO:0030334(regulation of cell migration);GO:0031410(cytoplasmic vesicle);G…	04530(Tight junction)	K06104	NA	angiomotin like 2 [Source:HGNC Symbol;Acc:HGNC:17812]	MSTRG.23453.1	u	chr3	134325848	134326529	MSTRG.23453	.	yes	novel	cis	100K	NA	0.889332
MSTRG.2935.1	u	chr1	218594819	218595132	MSTRG.2935	.	yes	NA	NA	NA	NA	NA	MSTRG.2935.1	u	chr1	218594819	218595132	MSTRG.2935	.	yes	novel	cis	1K	NA	1
MSTRG.20797.1	x	chr20	51366840	51409297	MSTRG.20797	NFATC2	yes	NA	NA	NA	NA	NA	MSTRG.20797.1	x	chr20	51366840	51409297	MSTRG.20797	NFATC2	yes	novel	cis	1K	NA	1
ENST00000371564	0	chr20	51386963	51542719	MSTRG.20798	NFATC2	yes	GO:0000122(negative regulation of transcription by RNA polymerase II);GO:0000790(nuclear chromatin);GO:0000976(transcription regulatory region sequence-specific DNA binding);GO:0000978(RNA polymerase II proximal promoter sequence-specific DNA binding);GO:0000981(DNA-binding transcription factor activity, RNA polymerase II-specific);GO:0001227(DNA-binding transcription repressor activity, RNA poly…	04022(cGMP-PKG signaling pathway);04218(Cellular senescence);04310(Wnt signaling pathway);04360(Axon guidance);04370(VEGF signaling pathway);04380(Osteoclast differentiation);04625(C-type lectin receptor signaling pathway);04650(Natural killer cell mediated cytotoxicity);04658(Th1 and Th2 cell differentiation);04659(Th17 cell differentiation);04660(T cell receptor signaling pathway);04662(B cell …	K17332	NA	nuclear factor of activated T cells 2 [Source:HGNC Symbol;Acc:HGNC:7776]	MSTRG.20797.1	x	chr20	51366840	51409297	MSTRG.20797	NFATC2	yes	novel	cis	100K	NA	0.625281
MSTRG.27194.1	i	chr5	174338789	174341925	MSTRG.27194	LINC01411	yes	NA	NA	NA	NA	NA	MSTRG.27193.1	j	chr5	174336231	174362711	MSTRG.27193	LINC01411	yes	novel	cis	10K	NA	0.798161
ENST00000507361	0	chr5	174336354	174529982	MSTRG.27193	LINC01411	yes	NA	NA	NA	NA	long intergenic non-protein coding RNA 1411 [Source:HGNC Symbol;Acc:HGNC:50703]	MSTRG.27193.1	j	chr5	174336231	174362711	MSTRG.27193	LINC01411	yes	novel	cis	1K	NA	0.985199
MSTRG.27193.1	j	chr5	174336231	174362711	MSTRG.27193	LINC01411	yes	NA	NA	NA	NA	NA	MSTRG.27193.1	j	chr5	174336231	174362711	MSTRG.27193	LINC01411	yes	novel	cis	1K	NA	1
MSTRG.27195.1	i	chr5	174356839	174357641	MSTRG.27195	LINC01411	yes	NA	NA	NA	NA	NA	MSTRG.27193.1	j	chr5	174336231	174362711	MSTRG.27193	LINC01411	yes	novel	cis	100K	NA	0.617482
MSTRG.5796.7	j	chr11	73677908	73761017	MSTRG.5796	RAB6A	yes	NA	NA	NA	NA	NA	MSTRG.5796.7	j	chr11	73677908	73761017	MSTRG.5796	RAB6A	yes	novel	cis	1K	NA	1
MSTRG.20810.1	i	chr20	52997729	52998990	MSTRG.20810	TSHZ2	yes	NA	NA	NA	NA	NA	MSTRG.20810.1	i	chr20	52997729	52998990	MSTRG.20810	TSHZ2	yes	novel	cis	1K	NA	1
MSTRG.34323.1	u	chrX	117284336	117284584	MSTRG.34323	.	yes	NA	NA	NA	NA	NA	MSTRG.34323.1	u	chrX	117284336	117284584	MSTRG.34323	.	yes	novel	cis	1K	NA	1
MSTRG.15209.5	u	chr17	76606015	76611177	MSTRG.15209	.	yes	NA	NA	NA	NA	NA	MSTRG.15209.3	u	chr17	76606015	76611214	MSTRG.15209	.	yes	novel	cis	1K	NA	-0.208172
ENST00000375036	0	chr17	76679569	76711004	MSTRG.15222	MXRA7	yes	GO:0016020(membrane);GO:0016021(integral component of membrane);GO:0062023(collagen-containing extracellular matrix)	NA	NA	NA	matrix remodeling associated 7 [Source:HGNC Symbol;Acc:HGNC:7541]	MSTRG.15209.3	u	chr17	76606015	76611214	MSTRG.15209	.	yes	novel	cis	100K	NA	0.590462
MSTRG.15209.3	u	chr17	76606015	76611214	MSTRG.15209	.	yes	NA	NA	NA	NA	NA	MSTRG.15209.3	u	chr17	76606015	76611214	MSTRG.15209	.	yes	novel	cis	1K	NA	1
MSTRG.25240.1	e	chr4	128559257	128576180	MSTRG.25240	AC078850	yes	NA	NA	NA	NA	NA	MSTRG.25242.1	u	chr4	128576608	128580075	MSTRG.25242	.	yes	novel	cis	100K	NA	0.987187
MSTRG.25242.1	u	chr4	128576608	128580075	MSTRG.25242	.	yes	NA	NA	NA	NA	NA	MSTRG.25242.1	u	chr4	128576608	128580075	MSTRG.25242	.	yes	novel	cis	1K	NA	1
MSTRG.25236.1	u	chr4	128534692	128540502	MSTRG.25236	.	yes	NA	NA	NA	NA	NA	MSTRG.25242.1	u	chr4	128576608	128580075	MSTRG.25242	.	yes	novel	cis	100K	NA	0.983422
MSTRG.25235.1	u	chr4	128526440	128529712	MSTRG.25235	.	yes	NA	NA	NA	NA	NA	MSTRG.25242.1	u	chr4	128576608	128580075	MSTRG.25242	.	yes	novel	cis	100K	NA	0.944158
MSTRG.25237.1	u	chr4	128541772	128545315	MSTRG.25237	.	yes	NA	NA	NA	NA	NA	MSTRG.25242.1	u	chr4	128576608	128580075	MSTRG.25242	.	yes	novel	cis	100K	NA	0.85635
MSTRG.10103.1	j	chr14	93237550	93246569	MSTRG.10103	BTBD7	yes	NA	NA	NA	NA	NA	MSTRG.10103.1	j	chr14	93237550	93246569	MSTRG.10103	BTBD7	yes	novel	cis	1K	NA	1
MSTRG.32917.1	j	chr9	96887221	96972949	MSTRG.32917	MFSD14C	yes	NA	NA	NA	NA	NA	MSTRG.32917.1	j	chr9	96887221	96972949	MSTRG.32917	MFSD14C	yes	novel	cis	1K	NA	1
MSTRG.33599.1	u	chrX	4540517	4545981	MSTRG.33599	.	yes	NA	NA	NA	NA	NA	MSTRG.33599.1	u	chrX	4540517	4545981	MSTRG.33599	.	yes	novel	cis	1K	NA	1
MSTRG.25240.1	e	chr4	128559257	128576180	MSTRG.25240	AC078850	yes	NA	NA	NA	NA	NA	MSTRG.25236.1	u	chr4	128534692	128540502	MSTRG.25236	.	yes	novel	cis	100K	NA	0.99417
MSTRG.25242.1	u	chr4	128576608	128580075	MSTRG.25242	.	yes	NA	NA	NA	NA	NA	MSTRG.25236.1	u	chr4	128534692	128540502	MSTRG.25236	.	yes	novel	cis	100K	NA	0.983422
MSTRG.25236.1	u	chr4	128534692	128540502	MSTRG.25236	.	yes	NA	NA	NA	NA	NA	MSTRG.25236.1	u	chr4	128534692	128540502	MSTRG.25236	.	yes	novel	cis	1K	NA	1
MSTRG.25235.1	u	chr4	128526440	128529712	MSTRG.25235	.	yes	NA	NA	NA	NA	NA	MSTRG.25236.1	u	chr4	128534692	128540502	MSTRG.25236	.	yes	novel	cis	10K	NA	0.977757
MSTRG.25237.1	u	chr4	128541772	128545315	MSTRG.25237	.	yes	NA	NA	NA	NA	NA	MSTRG.25236.1	u	chr4	128534692	128540502	MSTRG.25236	.	yes	novel	cis	10K	NA	0.914559
MSTRG.32345.1	u	chr9	22424417	22443192	MSTRG.32345	.	yes	NA	NA	NA	NA	NA	MSTRG.32342.1	u	chr9	22481657	22482423	MSTRG.32342	.	yes	novel	cis	100K	NA	0.973344
MSTRG.32338.1	u	chr9	22468949	22473101	MSTRG.32338	.	yes	NA	NA	NA	NA	NA	MSTRG.32342.1	u	chr9	22481657	22482423	MSTRG.32342	.	yes	novel	cis	100K	NA	0.984547
MSTRG.32342.1	u	chr9	22481657	22482423	MSTRG.32342	.	yes	NA	NA	NA	NA	NA	MSTRG.32342.1	u	chr9	22481657	22482423	MSTRG.32342	.	yes	novel	cis	1K	NA	1
ENST00000587806	0	chr19	11553047	11555467	MSTRG.16549	ELOF1	yes	GO:0000993(RNA polymerase II complex binding);GO:0003746(translation elongation factor activity);GO:0005515(protein binding);GO:0005634(nucleus);GO:0006368(transcription elongation from RNA polymerase II promoter);GO:0006414(translational elongation);GO:0008023(transcription elongation factor complex);GO:0046872(metal ion binding);GO:0048096(chromatin-mediated maintenance of transcription)	NA	NA	NA	elongation factor 1 homolog [Source:HGNC Symbol;Acc:HGNC:28691]	MSTRG.16549.2	j	chr19	11553043	11559230	MSTRG.16549	ELOF1	yes	novel	cis	1K	NA	-0.359695
MSTRG.16549.6	j	chr19	11553047	11559236	MSTRG.16549	ELOF1	yes	NA	NA	NA	NA	NA	MSTRG.16549.2	j	chr19	11553043	11559230	MSTRG.16549	ELOF1	yes	novel	cis	1K	NA	-0.323287
MSTRG.16549.3	j	chr19	11553043	11559236	MSTRG.16549	ELOF1	yes	NA	NA	NA	NA	NA	MSTRG.16549.2	j	chr19	11553043	11559230	MSTRG.16549	ELOF1	yes	novel	cis	1K	NA	0.877658
MSTRG.16549.2	j	chr19	11553043	11559230	MSTRG.16549	ELOF1	yes	NA	NA	NA	NA	NA	MSTRG.16549.2	j	chr19	11553043	11559230	MSTRG.16549	ELOF1	yes	novel	cis	1K	NA	1
MSTRG.13220.1	i	chr16	87802945	87804332	MSTRG.13220	AC126696	yes	NA	NA	NA	NA	NA	MSTRG.13220.1	i	chr16	87802945	87804332	MSTRG.13220	AC126696	yes	novel	cis	1K	NA	1
ENST00000565644	0	chr16	87830023	87863639	MSTRG.13228	SLC7A5	yes	GO:0005515(protein binding);GO:0005737(cytoplasm);GO:0005829(cytosol);GO:0005886(plasma membrane);GO:0006520(cellular amino acid metabolic process);GO:0006865(amino acid transport);GO:0007275(multicellular organism development);GO:0007399(nervous system development);GO:0015171(amino acid transmembrane transporter activity);GO:0015175(neutral amino acid transmembrane transporter activity);GO:00151…	04150(mTOR signaling pathway);05230(Central carbon metabolism in cancer)	K13780	NA	solute carrier family 7 member 5 [Source:HGNC Symbol;Acc:HGNC:11063]	MSTRG.13220.1	i	chr16	87802945	87804332	MSTRG.13220	AC126696	yes	novel	cis	100K	NA	0.855977
MSTRG.7699.1	i	chr12	74364699	74366488	MSTRG.7699	AC090502	yes	NA	NA	NA	NA	NA	MSTRG.7700.1	i	chr12	74373282	74374071	MSTRG.7700	AC090502	yes	novel	cis	10K	NA	0.945915
MSTRG.7701.1	i	chr12	74389769	74392232	MSTRG.7701	AC090502	yes	NA	NA	NA	NA	NA	MSTRG.7700.1	i	chr12	74373282	74374071	MSTRG.7700	AC090502	yes	novel	cis	100K	NA	0.956011
MSTRG.7700.1	i	chr12	74373282	74374071	MSTRG.7700	AC090502	yes	NA	NA	NA	NA	NA	MSTRG.7700.1	i	chr12	74373282	74374071	MSTRG.7700	AC090502	yes	novel	cis	1K	NA	1
MSTRG.7702.1	i	chr12	74398221	74399355	MSTRG.7702	AC090502	yes	NA	NA	NA	NA	NA	MSTRG.7700.1	i	chr12	74373282	74374071	MSTRG.7700	AC090502	yes	novel	cis	100K	NA	0.817108
MSTRG.25049.21	j	chr4	106304663	106316253	MSTRG.25049	TBCK	yes	NA	NA	NA	NA	NA	MSTRG.25049.21	j	chr4	106304663	106316253	MSTRG.25049	TBCK	yes	novel	cis	1K	NA	1
MSTRG.14975.10	j	chr17	64377888	64391513	MSTRG.14975	PECAM1	yes	NA	NA	NA	NA	NA	MSTRG.14975.10	j	chr17	64377888	64391513	MSTRG.14975	PECAM1	yes	novel	cis	1K	NA	1
MSTRG.14977.1	i	chr17	64391728	64395730	MSTRG.14977	PECAM1	yes	NA	NA	NA	NA	NA	MSTRG.14975.10	j	chr17	64377888	64391513	MSTRG.14975	PECAM1	yes	novel	cis	100K	NA	0.83403
MSTRG.14979.1	i	chr17	64399377	64400699	MSTRG.14979	PECAM1	yes	NA	NA	NA	NA	NA	MSTRG.14975.10	j	chr17	64377888	64391513	MSTRG.14975	PECAM1	yes	novel	cis	100K	NA	0.898258
MSTRG.9706.7	e	chr14	61298581	61300015	MSTRG.9706	PRKCH	yes	NA	NA	NA	NA	NA	MSTRG.9708.1	j	chr14	61294712	61322794	MSTRG.9708	AL359220	yes	novel	cis	10K	NA	0.921714
MSTRG.9708.1	j	chr14	61294712	61322794	MSTRG.9708	AL359220	yes	NA	NA	NA	NA	NA	MSTRG.9708.1	j	chr14	61294712	61322794	MSTRG.9708	AL359220	yes	novel	cis	1K	NA	1
MSTRG.27374.1	u	chr6	1257421	1270478	MSTRG.27374	.	yes	NA	NA	NA	NA	NA	MSTRG.27373.1	u	chr6	1252710	1257163	MSTRG.27373	.	yes	novel	cis	10K	NA	0.874804
MSTRG.27373.1	u	chr6	1252710	1257163	MSTRG.27373	.	yes	NA	NA	NA	NA	NA	MSTRG.27373.1	u	chr6	1252710	1257163	MSTRG.27373	.	yes	novel	cis	1K	NA	1
MSTRG.27375.2	u	chr6	1270765	1312072	MSTRG.27375	.	yes	NA	NA	NA	NA	NA	MSTRG.27375.1	x	chr6	1270764	1312100	MSTRG.27375	FOXQ1	yes	novel	cis	1K	NA	0.94134
MSTRG.27375.1	x	chr6	1270764	1312100	MSTRG.27375	FOXQ1	yes	NA	NA	NA	NA	NA	MSTRG.27375.1	x	chr6	1270764	1312100	MSTRG.27375	FOXQ1	yes	novel	cis	1K	NA	1
MSTRG.19036.5	j	chr2	127307504	127387932	MSTRG.19036	MAP3K2	yes	NA	NA	NA	NA	NA	MSTRG.19039.1	u	chr2	127400591	127406434	MSTRG.19039	.	yes	novel	cis	100K	NA	-0.540021
MSTRG.19039.1	u	chr2	127400591	127406434	MSTRG.19039	.	yes	NA	NA	NA	NA	NA	MSTRG.19039.1	u	chr2	127400591	127406434	MSTRG.19039	.	yes	novel	cis	1K	NA	1
MSTRG.19027.1	u	chr2	127406743	127408945	MSTRG.19027	.	yes	NA	NA	NA	NA	NA	MSTRG.19039.1	u	chr2	127400591	127406434	MSTRG.19039	.	yes	novel	cis	10K	NA	0.948135
MSTRG.19040.5	j	chr2	127480812	127526489	MSTRG.19040	IWS1	yes	NA	NA	NA	NA	NA	MSTRG.19039.1	u	chr2	127400591	127406434	MSTRG.19039	.	yes	novel	cis	100K	NA	0.483997
ENST00000234071	0	chr2	127418427	127429246	MSTRG.19028	PROC	yes	GO:0004252(serine-type endopeptidase activity);GO:0005509(calcium ion binding);GO:0005515(protein binding);GO:0005576(extracellular region);GO:0005615(extracellular space);GO:0005783(endoplasmic reticulum);GO:0005788(endoplasmic reticulum lumen);GO:0005794(Golgi apparatus);GO:0005796(Golgi lumen);GO:0006508(proteolysis);GO:0006888(endoplasmic reticulum to Golgi vesicle-mediated transport);GO:0007…	04610(Complement and coagulation cascades)	NA	NA	protein C, inactivator of coagulation factors Va and VIIIa [Source:HGNC Symbol;Acc:HGNC:9451]	MSTRG.19039.1	u	chr2	127400591	127406434	MSTRG.19039	.	yes	novel	cis	100K	NA	0.62596
MSTRG.3874.1	o	chr10	61909465	61954275	MSTRG.3874	ARID5B	yes	NA	NA	NA	NA	NA	MSTRG.3874.1	o	chr10	61909465	61954275	MSTRG.3874	ARID5B	yes	novel	cis	1K	NA	1
MSTRG.27194.1	i	chr5	174338789	174341925	MSTRG.27194	LINC01411	yes	NA	NA	NA	NA	NA	MSTRG.27195.1	i	chr5	174356839	174357641	MSTRG.27195	LINC01411	yes	novel	cis	100K	NA	0.821809
ENST00000507361	0	chr5	174336354	174529982	MSTRG.27193	LINC01411	yes	NA	NA	NA	NA	long intergenic non-protein coding RNA 1411 [Source:HGNC Symbol;Acc:HGNC:50703]	MSTRG.27195.1	i	chr5	174356839	174357641	MSTRG.27195	LINC01411	yes	novel	cis	100K	NA	0.683263
MSTRG.27193.1	j	chr5	174336231	174362711	MSTRG.27193	LINC01411	yes	NA	NA	NA	NA	NA	MSTRG.27195.1	i	chr5	174356839	174357641	MSTRG.27195	LINC01411	yes	novel	cis	100K	NA	0.617482
MSTRG.27195.1	i	chr5	174356839	174357641	MSTRG.27195	LINC01411	yes	NA	NA	NA	NA	NA	MSTRG.27195.1	i	chr5	174356839	174357641	MSTRG.27195	LINC01411	yes	novel	cis	1K	NA	1
ENST00000512160	0	chr5	111496947	111512535	MSTRG.26591	STARD4	yes	GO:0006869(lipid transport);GO:0008289(lipid binding);GO:0010873(positive regulation of cholesterol esterification);GO:0010879(cholesterol transport involved in cholesterol storage);GO:0015485(cholesterol binding);GO:0017127(cholesterol transporter activity);GO:0031410(cytoplasmic vesicle);GO:0032367(intracellular cholesterol transport);GO:0070508(cholesterol import);GO:0070859(positive regulatio…	NA	NA	NA	StAR related lipid transfer domain containing 4 [Source:HGNC Symbol;Acc:HGNC:18058]	MSTRG.26591.1	j	chr5	111496033	111512510	MSTRG.26591	STARD4	yes	novel	cis	1K	NA	-0.427338
MSTRG.26591.1	j	chr5	111496033	111512510	MSTRG.26591	STARD4	yes	NA	NA	NA	NA	NA	MSTRG.26591.1	j	chr5	111496033	111512510	MSTRG.26591	STARD4	yes	novel	cis	1K	NA	1
MSTRG.9097.3	j	chr13	109265430	109278518	MSTRG.9097	AL161431	yes	NA	NA	NA	NA	NA	MSTRG.9097.3	j	chr13	109265430	109278518	MSTRG.9097	AL161431	yes	novel	cis	1K	NA	1
MSTRG.19036.5	j	chr2	127307504	127387932	MSTRG.19036	MAP3K2	yes	NA	NA	NA	NA	NA	MSTRG.19027.1	u	chr2	127406743	127408945	MSTRG.19027	.	yes	novel	cis	100K	NA	-0.36178
MSTRG.19039.1	u	chr2	127400591	127406434	MSTRG.19039	.	yes	NA	NA	NA	NA	NA	MSTRG.19027.1	u	chr2	127406743	127408945	MSTRG.19027	.	yes	novel	cis	10K	NA	0.948135
MSTRG.19027.1	u	chr2	127406743	127408945	MSTRG.19027	.	yes	NA	NA	NA	NA	NA	MSTRG.19027.1	u	chr2	127406743	127408945	MSTRG.19027	.	yes	novel	cis	1K	NA	1
MSTRG.19040.5	j	chr2	127480812	127526489	MSTRG.19040	IWS1	yes	NA	NA	NA	NA	NA	MSTRG.19027.1	u	chr2	127406743	127408945	MSTRG.19027	.	yes	novel	cis	100K	NA	0.407758
ENST00000234071	0	chr2	127418427	127429246	MSTRG.19028	PROC	yes	GO:0004252(serine-type endopeptidase activity);GO:0005509(calcium ion binding);GO:0005515(protein binding);GO:0005576(extracellular region);GO:0005615(extracellular space);GO:0005783(endoplasmic reticulum);GO:0005788(endoplasmic reticulum lumen);GO:0005794(Golgi apparatus);GO:0005796(Golgi lumen);GO:0006508(proteolysis);GO:0006888(endoplasmic reticulum to Golgi vesicle-mediated transport);GO:0007…	04610(Complement and coagulation cascades)	NA	NA	protein C, inactivator of coagulation factors Va and VIIIa [Source:HGNC Symbol;Acc:HGNC:9451]	MSTRG.19027.1	u	chr2	127406743	127408945	MSTRG.19027	.	yes	novel	cis	100K	NA	0.676139
MSTRG.23831.1	u	chr3	171580600	171581140	MSTRG.23831	.	yes	NA	NA	NA	NA	NA	MSTRG.23831.1	u	chr3	171580600	171581140	MSTRG.23831	.	yes	novel	cis	1K	NA	1
MSTRG.24162.1	u	chr3	197478893	197479586	MSTRG.24162	.	yes	NA	NA	NA	NA	NA	MSTRG.24162.1	u	chr3	197478893	197479586	MSTRG.24162	.	yes	novel	cis	1K	NA	1
ENST00000354624	0	chr10	69220332	69267552	MSTRG.3946	HKDC1	yes	GO:0000166(nucleotide binding);GO:0001678(cellular glucose homeostasis);GO:0004340(glucokinase activity);GO:0004396(hexokinase activity);GO:0005524(ATP binding);GO:0005536(glucose binding);GO:0005739(mitochondrion);GO:0005829(cytosol);GO:0005975(carbohydrate metabolic process);GO:0006096(glycolytic process);GO:0008865(fructokinase activity);GO:0016301(kinase activity);GO:0016310(phosphorylation);…	00010(Glycolysis / Gluconeogenesis);00051(Fructose and mannose metabolism);00052(Galactose metabolism);00500(Starch and sucrose metabolism);00520(Amino sugar and nucleotide sugar metabolism);00524(Neomycin, kanamycin and gentamicin biosynthesis);04066(HIF-1 signaling pathway);04910(Insulin signaling pathway);04930(Type II diabetes mellitus);04973(Carbohydrate digestion and absorption);05230(Centr…	K00844	EC:2.7.1.1	hexokinase domain containing 1 [Source:HGNC Symbol;Acc:HGNC:23302]	MSTRG.3946.3	j	chr10	69258871	69267552	MSTRG.3946	HKDC1	yes	novel	cis	100K	NA	0.569831
ENST00000470920	0	chr10	69258871	69261637	MSTRG.3946	HKDC1	yes	GO:0000166(nucleotide binding);GO:0001678(cellular glucose homeostasis);GO:0004340(glucokinase activity);GO:0004396(hexokinase activity);GO:0005524(ATP binding);GO:0005536(glucose binding);GO:0005739(mitochondrion);GO:0005829(cytosol);GO:0005975(carbohydrate metabolic process);GO:0006096(glycolytic process);GO:0008865(fructokinase activity);GO:0016301(kinase activity);GO:0016310(phosphorylation);…	00010(Glycolysis / Gluconeogenesis);00051(Fructose and mannose metabolism);00052(Galactose metabolism);00500(Starch and sucrose metabolism);00520(Amino sugar and nucleotide sugar metabolism);00524(Neomycin, kanamycin and gentamicin biosynthesis);04066(HIF-1 signaling pathway);04910(Insulin signaling pathway);04930(Type II diabetes mellitus);04973(Carbohydrate digestion and absorption);05230(Centr…	K00844	EC:2.7.1.1	hexokinase domain containing 1 [Source:HGNC Symbol;Acc:HGNC:23302]	MSTRG.3946.3	j	chr10	69258871	69267552	MSTRG.3946	HKDC1	yes	novel	cis	1K	NA	0.711924
MSTRG.3946.3	j	chr10	69258871	69267552	MSTRG.3946	HKDC1	yes	NA	NA	NA	NA	NA	MSTRG.3946.3	j	chr10	69258871	69267552	MSTRG.3946	HKDC1	yes	novel	cis	1K	NA	1
MSTRG.13193.2	j	chr16	86474529	86478881	MSTRG.13193	FENDRR	yes	NA	NA	NA	NA	NA	MSTRG.13193.9	j	chr16	86490226	86508877	MSTRG.13193	FENDRR	yes	novel	cis	100K	NA	0.860197
ENST00000599749	0	chr16	86487737	86509099	MSTRG.13193	FENDRR	yes	NA	NA	NA	NA	FOXF1 adjacent non-coding developmental regulatory RNA [Source:HGNC Symbol;Acc:HGNC:43894]	MSTRG.13193.9	j	chr16	86490226	86508877	MSTRG.13193	FENDRR	yes	novel	cis	10K	NA	0.627968
ENST00000595886	0	chr16	86474529	86508860	MSTRG.13193	FENDRR	yes	NA	NA	NA	NA	FOXF1 adjacent non-coding developmental regulatory RNA [Source:HGNC Symbol;Acc:HGNC:43894]	MSTRG.13193.9	j	chr16	86490226	86508877	MSTRG.13193	FENDRR	yes	novel	cis	100K	NA	0.162099
MSTRG.13194.1	i	chr16	86479092	86482594	MSTRG.13194	FENDRR	yes	NA	NA	NA	NA	NA	MSTRG.13193.9	j	chr16	86490226	86508877	MSTRG.13193	FENDRR	yes	novel	cis	100K	NA	0.798686
ENST00000598996	0	chr16	86487706	86490879	MSTRG.13193	FENDRR	yes	NA	NA	NA	NA	FOXF1 adjacent non-coding developmental regulatory RNA [Source:HGNC Symbol;Acc:HGNC:43894]	MSTRG.13193.9	j	chr16	86490226	86508877	MSTRG.13193	FENDRR	yes	novel	cis	10K	NA	0.362097
ENST00000593604	0	chr16	86490268	86508877	MSTRG.13193	FENDRR	yes	NA	NA	NA	NA	FOXF1 adjacent non-coding developmental regulatory RNA [Source:HGNC Symbol;Acc:HGNC:43894]	MSTRG.13193.9	j	chr16	86490226	86508877	MSTRG.13193	FENDRR	yes	novel	cis	1K	NA	0.775426
MSTRG.13193.9	j	chr16	86490226	86508877	MSTRG.13193	FENDRR	yes	NA	NA	NA	NA	NA	MSTRG.13193.9	j	chr16	86490226	86508877	MSTRG.13193	FENDRR	yes	novel	cis	1K	NA	1
MSTRG.12745.1	i	chr16	65230886	65231621	MSTRG.12745	AC009055	yes	NA	NA	NA	NA	NA	MSTRG.12745.1	i	chr16	65230886	65231621	MSTRG.12745	AC009055	yes	novel	cis	1K	NA	1
MSTRG.19882.1	u	chr2	215926597	215927099	MSTRG.19882	.	yes	NA	NA	NA	NA	NA	MSTRG.19882.1	u	chr2	215926597	215927099	MSTRG.19882	.	yes	novel	cis	1K	NA	1
ENST00000651957	0	chr1	149701104	149705716	MSTRG.1980	LINC00869	yes	NA	NA	NA	NA	long intergenic non-protein coding RNA 869 [Source:HGNC Symbol;Acc:HGNC:29050]	MSTRG.1983.1	i	chr1	149630902	149631956	MSTRG.1983	LINC00869	yes	novel	cis	100K	NA	0.862914
MSTRG.1983.1	i	chr1	149630902	149631956	MSTRG.1983	LINC00869	yes	NA	NA	NA	NA	NA	MSTRG.1983.1	i	chr1	149630902	149631956	MSTRG.1983	LINC00869	yes	novel	cis	1K	NA	1
ENST00000620190	0	chr1	149607307	149647610	MSTRG.1980	LINC00869	yes	NA	NA	NA	NA	long intergenic non-protein coding RNA 869 [Source:HGNC Symbol;Acc:HGNC:29050]	MSTRG.1983.1	i	chr1	149630902	149631956	MSTRG.1983	LINC00869	yes	novel	cis	100K	NA	0.781497
MSTRG.25230.6	j	chr4	128428070	128507536	MSTRG.25230	LINC02615	yes	NA	NA	NA	NA	NA	MSTRG.25235.1	u	chr4	128526440	128529712	MSTRG.25235	.	yes	novel	cis	100K	NA	0.768073
MSTRG.25230.8	j	chr4	128428070	128523184	MSTRG.25230	LINC02615	yes	NA	NA	NA	NA	NA	MSTRG.25235.1	u	chr4	128526440	128529712	MSTRG.25235	.	yes	novel	cis	100K	NA	0.501674
MSTRG.25230.9	j	chr4	128428070	128525199	MSTRG.25230	LINC02615	yes	NA	NA	NA	NA	NA	MSTRG.25235.1	u	chr4	128526440	128529712	MSTRG.25235	.	yes	novel	cis	100K	NA	0.962657
MSTRG.25240.1	e	chr4	128559257	128576180	MSTRG.25240	AC078850	yes	NA	NA	NA	NA	NA	MSTRG.25235.1	u	chr4	128526440	128529712	MSTRG.25235	.	yes	novel	cis	100K	NA	0.977125
MSTRG.25230.10	j	chr4	128428070	128435329	MSTRG.25230	LINC02615	yes	NA	NA	NA	NA	NA	MSTRG.25235.1	u	chr4	128526440	128529712	MSTRG.25235	.	yes	novel	cis	100K	NA	0.861048
MSTRG.25242.1	u	chr4	128576608	128580075	MSTRG.25242	.	yes	NA	NA	NA	NA	NA	MSTRG.25235.1	u	chr4	128526440	128529712	MSTRG.25235	.	yes	novel	cis	100K	NA	0.944158
MSTRG.25236.1	u	chr4	128534692	128540502	MSTRG.25236	.	yes	NA	NA	NA	NA	NA	MSTRG.25235.1	u	chr4	128526440	128529712	MSTRG.25235	.	yes	novel	cis	10K	NA	0.977757
MSTRG.25235.1	u	chr4	128526440	128529712	MSTRG.25235	.	yes	NA	NA	NA	NA	NA	MSTRG.25235.1	u	chr4	128526440	128529712	MSTRG.25235	.	yes	novel	cis	1K	NA	1
ENST00000511497	0	chr4	128428070	128519394	MSTRG.25230	LINC02615	yes	NA	NA	NA	NA	long intergenic non-protein coding RNA 2615 [Source:HGNC Symbol;Acc:HGNC:53402]	MSTRG.25235.1	u	chr4	128526440	128529712	MSTRG.25235	.	yes	novel	cis	100K	NA	0.616774
MSTRG.25237.1	u	chr4	128541772	128545315	MSTRG.25237	.	yes	NA	NA	NA	NA	NA	MSTRG.25235.1	u	chr4	128526440	128529712	MSTRG.25235	.	yes	novel	cis	100K	NA	0.940414
MSTRG.8842.1	i	chr13	67018788	67024463	MSTRG.8842	PCDH9	yes	NA	NA	NA	NA	NA	MSTRG.8842.1	i	chr13	67018788	67024463	MSTRG.8842	PCDH9	yes	novel	cis	1K	NA	1
MSTRG.25900.4	j	chr5	34182699	34245279	MSTRG.25900	AC138409	yes	NA	NA	NA	NA	NA	MSTRG.25900.4	j	chr5	34182699	34245279	MSTRG.25900	AC138409	yes	novel	cis	1K	NA	1
MSTRG.15721.1	u	chr18	28177178	28177827	MSTRG.15721	.	yes	NA	NA	NA	NA	NA	MSTRG.15721.1	u	chr18	28177178	28177827	MSTRG.15721	.	yes	novel	cis	1K	NA	1
MSTRG.23752.4	u	chr3	161606806	161637172	MSTRG.23752	.	yes	NA	NA	NA	NA	NA	MSTRG.23753.1	u	chr3	161601279	161624757	MSTRG.23753	.	yes	novel	cis	10K	NA	-0.0856961
MSTRG.23755.1	u	chr3	161685174	161746752	MSTRG.23755	.	yes	NA	NA	NA	NA	NA	MSTRG.23753.1	u	chr3	161601279	161624757	MSTRG.23753	.	yes	novel	cis	100K	NA	0.649582
MSTRG.23752.5	u	chr3	161644760	161670093	MSTRG.23752	.	yes	NA	NA	NA	NA	NA	MSTRG.23753.1	u	chr3	161601279	161624757	MSTRG.23753	.	yes	novel	cis	100K	NA	0.618478
MSTRG.23752.2	u	chr3	161600361	161637159	MSTRG.23752	.	yes	NA	NA	NA	NA	NA	MSTRG.23753.1	u	chr3	161601279	161624757	MSTRG.23753	.	yes	novel	cis	1K	NA	0.365873
MSTRG.23752.1	u	chr3	161600295	161683411	MSTRG.23752	.	yes	NA	NA	NA	NA	NA	MSTRG.23753.1	u	chr3	161601279	161624757	MSTRG.23753	.	yes	novel	cis	1K	NA	0.668487
MSTRG.23753.1	u	chr3	161601279	161624757	MSTRG.23753	.	yes	NA	NA	NA	NA	NA	MSTRG.23753.1	u	chr3	161601279	161624757	MSTRG.23753	.	yes	novel	cis	1K	NA	1
ENST00000613358	0	chr4	128269237	128288822	MSTRG.25229	PGRMC2	yes	GO:0003707(steroid hormone receptor activity);GO:0005496(steroid binding);GO:0005515(protein binding);GO:0005635(nuclear envelope);GO:0008289(lipid binding);GO:0016020(membrane);GO:0016021(integral component of membrane);GO:0043401(steroid hormone mediated signaling pathway)	NA	K17278	NA	progesterone receptor membrane component 2 [Source:HGNC Symbol;Acc:HGNC:16089]	MSTRG.25231.1	i	chr4	128295572	128299463	MSTRG.25231	LINC02615	yes	novel	cis	100K	NA	0.63244
ENST00000503588	0	chr4	128270871	128286787	MSTRG.25229	PGRMC2	yes	GO:0003707(steroid hormone receptor activity);GO:0005496(steroid binding);GO:0005515(protein binding);GO:0005635(nuclear envelope);GO:0008289(lipid binding);GO:0016020(membrane);GO:0016021(integral component of membrane);GO:0043401(steroid hormone mediated signaling pathway)	NA	K17278	NA	progesterone receptor membrane component 2 [Source:HGNC Symbol;Acc:HGNC:16089]	MSTRG.25231.1	i	chr4	128295572	128299463	MSTRG.25231	LINC02615	yes	novel	cis	100K	NA	0.784064
ENST00000394276	0	chr4	128269256	128273061	MSTRG.25229	PGRMC2	yes	GO:0003707(steroid hormone receptor activity);GO:0005496(steroid binding);GO:0005515(protein binding);GO:0005635(nuclear envelope);GO:0008289(lipid binding);GO:0016020(membrane);GO:0016021(integral component of membrane);GO:0043401(steroid hormone mediated signaling pathway)	NA	K17278	NA	progesterone receptor membrane component 2 [Source:HGNC Symbol;Acc:HGNC:16089]	MSTRG.25231.1	i	chr4	128295572	128299463	MSTRG.25231	LINC02615	yes	novel	cis	100K	NA	0.929827
MSTRG.25233.1	i	chr4	128314481	128319515	MSTRG.25233	LINC02615	yes	NA	NA	NA	NA	NA	MSTRG.25231.1	i	chr4	128295572	128299463	MSTRG.25231	LINC02615	yes	novel	cis	100K	NA	0.972688
MSTRG.25231.1	i	chr4	128295572	128299463	MSTRG.25231	LINC02615	yes	NA	NA	NA	NA	NA	MSTRG.25231.1	i	chr4	128295572	128299463	MSTRG.25231	LINC02615	yes	novel	cis	1K	NA	1
MSTRG.25230.1	j	chr4	128287559	128310675	MSTRG.25230	LINC02615	yes	NA	NA	NA	NA	NA	MSTRG.25231.1	i	chr4	128295572	128299463	MSTRG.25231	LINC02615	yes	novel	cis	10K	NA	0.925048
MSTRG.5406.1	x	chr11	62026994	62086817	MSTRG.5406	AP003733	yes	NA	NA	NA	NA	NA	MSTRG.5408.1	u	chr11	62033223	62035024	MSTRG.5408	.	yes	novel	cis	10K	NA	0.73436
MSTRG.5407.1	u	chr11	62029962	62030728	MSTRG.5407	.	yes	NA	NA	NA	NA	NA	MSTRG.5408.1	u	chr11	62033223	62035024	MSTRG.5408	.	yes	novel	cis	10K	NA	0.885927
MSTRG.5408.1	u	chr11	62033223	62035024	MSTRG.5408	.	yes	NA	NA	NA	NA	NA	MSTRG.5408.1	u	chr11	62033223	62035024	MSTRG.5408	.	yes	novel	cis	1K	NA	1
MSTRG.19851.1	u	chr2	210684498	210690768	MSTRG.19851	.	yes	NA	NA	NA	NA	NA	MSTRG.19851.1	u	chr2	210684498	210690768	MSTRG.19851	.	yes	novel	cis	1K	NA	1
ENST00000645825	0	chr2	210657360	210678997	MSTRG.19854	CPS1	yes	GO:0000050(urea cycle);GO:0000166(nucleotide binding);GO:0001889(liver development);GO:0003824(catalytic activity);GO:0004087(carbamoyl-phosphate synthase (ammonia) activity);GO:0004088(carbamoyl-phosphate synthase (glutamine-hydrolyzing) activity);GO:0004175(endopeptidase activity);GO:0005509(calcium ion binding);GO:0005515(protein binding);GO:0005524(ATP binding);GO:0005543(phospholipid binding…	00220(Arginine biosynthesis);00250(Alanine, aspartate and glutamate metabolism);00910(Nitrogen metabolism)	K01948	EC:6.3.4.16	carbamoyl-phosphate synthase 1 [Source:HGNC Symbol;Acc:HGNC:2323]	MSTRG.19851.1	u	chr2	210684498	210690768	MSTRG.19851	.	yes	novel	cis	100K	NA	0.993071
MSTRG.10273.1	u	chr14	105084428	105086245	MSTRG.10273	.	yes	NA	NA	NA	NA	NA	MSTRG.10273.1	u	chr14	105084428	105086245	MSTRG.10273	.	yes	novel	cis	1K	NA	1
MSTRG.10274.1	j	chr14	105087648	105099004	MSTRG.10274	LINC02298	yes	NA	NA	NA	NA	NA	MSTRG.10273.1	u	chr14	105084428	105086245	MSTRG.10273	.	yes	novel	cis	10K	NA	0.814335
MSTRG.29167.1	i	chr6	160365187	160366001	MSTRG.29167	SLC22A3	yes	NA	NA	NA	NA	NA	MSTRG.29167.1	i	chr6	160365187	160366001	MSTRG.29167	SLC22A3	yes	novel	cis	1K	NA	1
MSTRG.29166.3	j	chr6	160446709	160452941	MSTRG.29166	SLC22A3	yes	NA	NA	NA	NA	NA	MSTRG.29167.1	i	chr6	160365187	160366001	MSTRG.29167	SLC22A3	yes	novel	cis	100K	NA	0.230588
ENST00000225792	0	chr17	64499616	64506521	MSTRG.14995	DDX5	yes	GO:0000122(negative regulation of transcription by RNA polymerase II);GO:0000166(nucleotide binding);GO:0000380(alternative mRNA splicing, via spliceosome);GO:0000381(regulation of alternative mRNA splicing, via spliceosome);GO:0000398(mRNA splicing, via spliceosome);GO:0000956(nuclear-transcribed mRNA catabolic process);GO:0001837(epithelial to mesenchymal transition);GO:0003676(nucleic acid bin…	03040(Spliceosome);05202(Transcriptional misregulation in cancer);05205(Proteoglycans in cancer)	NA	NA	DEAD-box helicase 5 [Source:HGNC Symbol;Acc:HGNC:2746]	MSTRG.14980.1	i	chr17	64401742	64403335	MSTRG.14980	PECAM1	yes	novel	cis	100K	NA	0.498637
ENST00000578804	0	chr17	64499914	64505956	MSTRG.14995	DDX5	yes	GO:0000122(negative regulation of transcription by RNA polymerase II);GO:0000166(nucleotide binding);GO:0000380(alternative mRNA splicing, via spliceosome);GO:0000381(regulation of alternative mRNA splicing, via spliceosome);GO:0000398(mRNA splicing, via spliceosome);GO:0000956(nuclear-transcribed mRNA catabolic process);GO:0001837(epithelial to mesenchymal transition);GO:0003676(nucleic acid bin…	03040(Spliceosome);05202(Transcriptional misregulation in cancer);05205(Proteoglycans in cancer)	NA	NA	DEAD-box helicase 5 [Source:HGNC Symbol;Acc:HGNC:2746]	MSTRG.14980.1	i	chr17	64401742	64403335	MSTRG.14980	PECAM1	yes	novel	cis	100K	NA	-0.477001
MSTRG.14980.1	i	chr17	64401742	64403335	MSTRG.14980	PECAM1	yes	NA	NA	NA	NA	NA	MSTRG.14980.1	i	chr17	64401742	64403335	MSTRG.14980	PECAM1	yes	novel	cis	1K	NA	1
ENST00000611359	0	chr19	24087160	24129961	MSTRG.16952	ZNF254	yes	GO:0000122(negative regulation of transcription by RNA polymerase II);GO:0000981(DNA-binding transcription factor activity, RNA polymerase II-specific);GO:0003676(nucleic acid binding);GO:0003677(DNA binding);GO:0005622(intracellular);GO:0005634(nucleus);GO:0006355(regulation of transcription, DNA-templated);GO:0046872(metal ion binding)	05168(Herpes simplex virus 1 infection)	K09228	NA	zinc finger protein 254 [Source:HGNC Symbol;Acc:HGNC:13047]	MSTRG.16952.5	j	chr19	24033426	24069154	MSTRG.16952	AC092279	yes	novel	cis	100K	NA	-0.167691
MSTRG.16952.5	j	chr19	24033426	24069154	MSTRG.16952	AC092279	yes	NA	NA	NA	NA	NA	MSTRG.16952.5	j	chr19	24033426	24069154	MSTRG.16952	AC092279	yes	novel	cis	1K	NA	1
MSTRG.7383.3	j	chr12	55725448	55729220	MSTRG.7383	CD63	yes	NA	NA	NA	NA	NA	MSTRG.7383.3	j	chr12	55725448	55729220	MSTRG.7383	CD63	yes	novel	cis	1K	NA	1
MSTRG.34652.1	u	chrY	5945077	5945396	MSTRG.34652	.	yes	NA	NA	NA	NA	NA	MSTRG.34652.1	u	chrY	5945077	5945396	MSTRG.34652	.	yes	novel	cis	1K	NA	1
MSTRG.32430.3	i	chr9	33581776	33590447	MSTRG.32430	CYP4F26P	yes	NA	NA	NA	NA	NA	MSTRG.32430.3	i	chr9	33581776	33590447	MSTRG.32430	CYP4F26P	yes	novel	cis	1K	NA	1
MSTRG.14975.10	j	chr17	64377888	64391513	MSTRG.14975	PECAM1	yes	NA	NA	NA	NA	NA	MSTRG.14977.1	i	chr17	64391728	64395730	MSTRG.14977	PECAM1	yes	novel	cis	100K	NA	0.83403
MSTRG.14977.1	i	chr17	64391728	64395730	MSTRG.14977	PECAM1	yes	NA	NA	NA	NA	NA	MSTRG.14977.1	i	chr17	64391728	64395730	MSTRG.14977	PECAM1	yes	novel	cis	1K	NA	1
MSTRG.14979.1	i	chr17	64399377	64400699	MSTRG.14979	PECAM1	yes	NA	NA	NA	NA	NA	MSTRG.14977.1	i	chr17	64391728	64395730	MSTRG.14977	PECAM1	yes	novel	cis	10K	NA	0.883757
MSTRG.8843.3	j	chr13	67101018	67156931	MSTRG.8843	AL160254	yes	NA	NA	NA	NA	NA	MSTRG.8843.4	o	chr13	67116317	67141670	MSTRG.8843	AL160254	yes	novel	cis	100K	NA	0.956642
MSTRG.8844.1	i	chr13	67105754	67116243	MSTRG.8844	PCDH9	yes	NA	NA	NA	NA	NA	MSTRG.8843.4	o	chr13	67116317	67141670	MSTRG.8843	AL160254	yes	novel	cis	100K	NA	0.977488
MSTRG.8843.4	o	chr13	67116317	67141670	MSTRG.8843	AL160254	yes	NA	NA	NA	NA	NA	MSTRG.8843.4	o	chr13	67116317	67141670	MSTRG.8843	AL160254	yes	novel	cis	1K	NA	1
MSTRG.8843.1	o	chr13	67100932	67157258	MSTRG.8843	AL160254	yes	NA	NA	NA	NA	NA	MSTRG.8843.4	o	chr13	67116317	67141670	MSTRG.8843	AL160254	yes	novel	cis	100K	NA	0.936583
MSTRG.27967.1	o	chr6	32894175	32904220	MSTRG.27967	HLA-Z	yes	NA	NA	NA	NA	NA	MSTRG.27967.1	o	chr6	32894175	32904220	MSTRG.27967	HLA-Z	yes	novel	cis	1K	NA	1
MSTRG.2802.1	i	chr1	205448623	205449691	MSTRG.2802	LEMD1	yes	NA	NA	NA	NA	NA	MSTRG.2802.1	i	chr1	205448623	205449691	MSTRG.2802	LEMD1	yes	novel	cis	1K	NA	1
MSTRG.2799.1	i	chr1	205442032	205444326	MSTRG.2799	LEMD1	yes	NA	NA	NA	NA	NA	MSTRG.2802.1	i	chr1	205448623	205449691	MSTRG.2802	LEMD1	yes	novel	cis	10K	NA	0.928135
ENST00000626538	0	chr1	205434885	205456746	MSTRG.2798	BLACAT1	yes	NA	NA	NA	NA	bladder cancer associated transcript 1 [Source:HGNC Symbol;Acc:HGNC:48597]	MSTRG.2802.1	i	chr1	205448623	205449691	MSTRG.2802	LEMD1	yes	novel	cis	100K	NA	0.881006
MSTRG.11893.2	j	chr16	2883215	2905418	MSTRG.11893	FLYWCH2	yes	NA	NA	NA	NA	NA	MSTRG.11893.2	j	chr16	2883215	2905418	MSTRG.11893	FLYWCH2	yes	novel	cis	1K	NA	1
ENST00000572006	0	chr16	2883259	2896896	MSTRG.11893	FLYWCH2	yes	GO:0003723(RNA binding);GO:0005575(cellular_component);GO:0008150(biological_process)	NA	NA	NA	FLYWCH family member 2 [Source:HGNC Symbol;Acc:HGNC:25178]	MSTRG.11893.2	j	chr16	2883215	2905418	MSTRG.11893	FLYWCH2	yes	novel	cis	1K	NA	-0.901839
MSTRG.1972.2	x	chr1	149202568	149205896	MSTRG.1972	AC245297	yes	NA	NA	NA	NA	NA	MSTRG.1972.2	x	chr1	149202568	149205896	MSTRG.1972	AC245297	yes	novel	cis	1K	NA	1
MSTRG.23774.8	i	chr3	165498131	165517462	MSTRG.23774	LINC01322	yes	NA	NA	NA	NA	NA	MSTRG.23774.8	i	chr3	165498131	165517462	MSTRG.23774	LINC01322	yes	novel	cis	1K	NA	1
MSTRG.30117.1	u	chr7	93398176	93398511	MSTRG.30117	.	yes	NA	NA	NA	NA	NA	MSTRG.30117.1	u	chr7	93398176	93398511	MSTRG.30117	.	yes	novel	cis	1K	NA	1
MSTRG.1870.14	j	chr1	120419850	120842277	MSTRG.1870	NBPF8	yes	NA	NA	NA	NA	NA	MSTRG.1802.4	j	chr1	120327217	120342716	MSTRG.1802	AC244669	yes	novel	cis	100K	NA	0.647529
MSTRG.1802.4	j	chr1	120327217	120342716	MSTRG.1802	AC244669	yes	NA	NA	NA	NA	NA	MSTRG.1802.4	j	chr1	120327217	120342716	MSTRG.1802	AC244669	yes	novel	cis	1K	NA	1
MSTRG.1870.13	j	chr1	120416644	120818437	MSTRG.1870	NBPF26	yes	NA	NA	NA	NA	NA	MSTRG.1802.4	j	chr1	120327217	120342716	MSTRG.1802	AC244669	yes	novel	cis	100K	NA	-0.848178
MSTRG.32361.1	u	chr9	22514637	22515738	MSTRG.32361	.	yes	NA	NA	NA	NA	NA	MSTRG.32361.1	u	chr9	22514637	22515738	MSTRG.32361	.	yes	novel	cis	1K	NA	1
MSTRG.32363.1	u	chr9	22520163	22521478	MSTRG.32363	.	yes	NA	NA	NA	NA	NA	MSTRG.32361.1	u	chr9	22514637	22515738	MSTRG.32361	.	yes	novel	cis	10K	NA	0.623955
MSTRG.30464.8	j	chr7	120853582	120858323	MSTRG.30464	TSPAN12	yes	NA	NA	NA	NA	NA	MSTRG.30464.8	j	chr7	120853582	120858323	MSTRG.30464	TSPAN12	yes	novel	cis	1K	NA	1
MSTRG.10273.1	u	chr14	105084428	105086245	MSTRG.10273	.	yes	NA	NA	NA	NA	NA	MSTRG.10274.1	j	chr14	105087648	105099004	MSTRG.10274	LINC02298	yes	novel	cis	10K	NA	0.814335
MSTRG.10274.1	j	chr14	105087648	105099004	MSTRG.10274	LINC02298	yes	NA	NA	NA	NA	NA	MSTRG.10274.1	j	chr14	105087648	105099004	MSTRG.10274	LINC02298	yes	novel	cis	1K	NA	1
MSTRG.2802.1	i	chr1	205448623	205449691	MSTRG.2802	LEMD1	yes	NA	NA	NA	NA	NA	MSTRG.2799.1	i	chr1	205442032	205444326	MSTRG.2799	LEMD1	yes	novel	cis	10K	NA	0.928135
MSTRG.2799.1	i	chr1	205442032	205444326	MSTRG.2799	LEMD1	yes	NA	NA	NA	NA	NA	MSTRG.2799.1	i	chr1	205442032	205444326	MSTRG.2799	LEMD1	yes	novel	cis	1K	NA	1
ENST00000626538	0	chr1	205434885	205456746	MSTRG.2798	BLACAT1	yes	NA	NA	NA	NA	bladder cancer associated transcript 1 [Source:HGNC Symbol;Acc:HGNC:48597]	MSTRG.2799.1	i	chr1	205442032	205444326	MSTRG.2799	LEMD1	yes	novel	cis	10K	NA	0.955169
MSTRG.21833.1	i	chr22	31238279	31244177	MSTRG.21833	LIMK2	yes	NA	NA	NA	NA	NA	MSTRG.21833.1	i	chr22	31238279	31244177	MSTRG.21833	LIMK2	yes	novel	cis	1K	NA	1
MSTRG.34300.1	u	chrX	112535165	112535426	MSTRG.34300	.	yes	NA	NA	NA	NA	NA	MSTRG.34300.1	u	chrX	112535165	112535426	MSTRG.34300	.	yes	novel	cis	1K	NA	1
MSTRG.20177.1	i	chr20	392680	393926	MSTRG.20177	TRIB3	yes	NA	NA	NA	NA	NA	MSTRG.20177.1	i	chr20	392680	393926	MSTRG.20177	TRIB3	yes	novel	cis	1K	NA	1
MSTRG.14975.10	j	chr17	64377888	64391513	MSTRG.14975	PECAM1	yes	NA	NA	NA	NA	NA	MSTRG.14979.1	i	chr17	64399377	64400699	MSTRG.14979	PECAM1	yes	novel	cis	100K	NA	0.898258
MSTRG.14977.1	i	chr17	64391728	64395730	MSTRG.14977	PECAM1	yes	NA	NA	NA	NA	NA	MSTRG.14979.1	i	chr17	64399377	64400699	MSTRG.14979	PECAM1	yes	novel	cis	10K	NA	0.883757
MSTRG.14979.1	i	chr17	64399377	64400699	MSTRG.14979	PECAM1	yes	NA	NA	NA	NA	NA	MSTRG.14979.1	i	chr17	64399377	64400699	MSTRG.14979	PECAM1	yes	novel	cis	1K	NA	1
MSTRG.1182.2	i	chr1	61106991	61114912	MSTRG.1182	NFIA	yes	NA	NA	NA	NA	NA	MSTRG.1182.2	i	chr1	61106991	61114912	MSTRG.1182	NFIA	yes	novel	cis	1K	NA	1
ENST00000455864	0	chr12	54325139	54350913	MSTRG.7394	COPZ1	yes	GO:0000139(Golgi membrane);GO:0005737(cytoplasm);GO:0005789(endoplasmic reticulum membrane);GO:0005794(Golgi apparatus);GO:0005829(cytosol);GO:0006886(intracellular protein transport);GO:0006888(endoplasmic reticulum to Golgi vesicle-mediated transport);GO:0006890(retrograde vesicle-mediated transport, Golgi to endoplasmic reticulum);GO:0006891(intra-Golgi vesicle-mediated transport);GO:0015031(p…	NA	K20472	NA	coatomer protein complex subunit zeta 1 [Source:HGNC Symbol;Acc:HGNC:2243]	MSTRG.7404.2	x	chr12	54395346	54397804	MSTRG.7404	ITGA5	yes	novel	cis	100K	NA	-0.555663
MSTRG.7404.2	x	chr12	54395346	54397804	MSTRG.7404	ITGA5	yes	NA	NA	NA	NA	NA	MSTRG.7404.2	x	chr12	54395346	54397804	MSTRG.7404	ITGA5	yes	novel	cis	1K	NA	1
ENST00000394313	0	chr12	54369136	54384723	MSTRG.7402	ZNF385A	yes	GO:0000790(nuclear chromatin);GO:0000981(DNA-binding transcription factor activity, RNA polymerase II-specific);GO:0002039(p53 binding);GO:0003676(nucleic acid binding);GO:0003677(DNA binding);GO:0003723(RNA binding);GO:0003730(mRNA 3'-UTR binding);GO:0005634(nucleus);GO:0005654(nucleoplasm);GO:0005730(nucleolus);GO:0005737(cytoplasm);GO:0006357(regulation of transcription by RNA polymerase II);G…	NA	NA	NA	zinc finger protein 385A [Source:HGNC Symbol;Acc:HGNC:17521]	MSTRG.7404.2	x	chr12	54395346	54397804	MSTRG.7404	ITGA5	yes	novel	cis	100K	NA	-0.6969
MSTRG.19834.1	u	chr2	209083120	209083560	MSTRG.19834	.	yes	NA	NA	NA	NA	NA	MSTRG.19834.1	u	chr2	209083120	209083560	MSTRG.19834	.	yes	novel	cis	1K	NA	1
MSTRG.14683.1	u	chr17	49129238	49129616	MSTRG.14683	.	yes	NA	NA	NA	NA	NA	MSTRG.14683.1	u	chr17	49129238	49129616	MSTRG.14683	.	yes	novel	cis	1K	NA	1
MSTRG.31584.1	i	chr8	89698165	89698883	MSTRG.31584	AF117829	yes	NA	NA	NA	NA	NA	MSTRG.31584.1	i	chr8	89698165	89698883	MSTRG.31584	AF117829	yes	novel	cis	1K	NA	1
MSTRG.25240.1	e	chr4	128559257	128576180	MSTRG.25240	AC078850	yes	NA	NA	NA	NA	NA	MSTRG.25237.1	u	chr4	128541772	128545315	MSTRG.25237	.	yes	novel	cis	100K	NA	0.920848
MSTRG.25242.1	u	chr4	128576608	128580075	MSTRG.25242	.	yes	NA	NA	NA	NA	NA	MSTRG.25237.1	u	chr4	128541772	128545315	MSTRG.25237	.	yes	novel	cis	100K	NA	0.85635
MSTRG.25236.1	u	chr4	128534692	128540502	MSTRG.25236	.	yes	NA	NA	NA	NA	NA	MSTRG.25237.1	u	chr4	128541772	128545315	MSTRG.25237	.	yes	novel	cis	10K	NA	0.914559
MSTRG.25235.1	u	chr4	128526440	128529712	MSTRG.25235	.	yes	NA	NA	NA	NA	NA	MSTRG.25237.1	u	chr4	128541772	128545315	MSTRG.25237	.	yes	novel	cis	100K	NA	0.940414
MSTRG.25237.1	u	chr4	128541772	128545315	MSTRG.25237	.	yes	NA	NA	NA	NA	NA	MSTRG.25237.1	u	chr4	128541772	128545315	MSTRG.25237	.	yes	novel	cis	1K	NA	1
MSTRG.1136.2	j	chr1	55066359	55214736	MSTRG.1136	USP24	yes	NA	NA	NA	NA	NA	MSTRG.1131.1	u	chr1	55027154	55027760	MSTRG.1131	.	yes	novel	cis	100K	NA	0.351148
MSTRG.1131.1	u	chr1	55027154	55027760	MSTRG.1131	.	yes	NA	NA	NA	NA	NA	MSTRG.1131.1	u	chr1	55027154	55027760	MSTRG.1131	.	yes	novel	cis	1K	NA	1
MSTRG.13147.2	i	chr16	80925656	80933588	MSTRG.13147	AC009070	yes	NA	NA	NA	NA	NA	MSTRG.13147.2	i	chr16	80925656	80933588	MSTRG.13147	AC009070	yes	novel	cis	1K	NA	1
MSTRG.32361.1	u	chr9	22514637	22515738	MSTRG.32361	.	yes	NA	NA	NA	NA	NA	MSTRG.32363.1	u	chr9	22520163	22521478	MSTRG.32363	.	yes	novel	cis	10K	NA	0.623955
MSTRG.32363.1	u	chr9	22520163	22521478	MSTRG.32363	.	yes	NA	NA	NA	NA	NA	MSTRG.32363.1	u	chr9	22520163	22521478	MSTRG.32363	.	yes	novel	cis	1K	NA	1
MSTRG.25703.1	u	chr5	5519519	5519741	MSTRG.25703	.	yes	NA	NA	NA	NA	NA	MSTRG.25703.1	u	chr5	5519519	5519741	MSTRG.25703	.	yes	novel	cis	1K	NA	1
MSTRG.24053.1	u	chr3	191896184	191896503	MSTRG.24053	.	yes	NA	NA	NA	NA	NA	MSTRG.24053.1	u	chr3	191896184	191896503	MSTRG.24053	.	yes	novel	cis	1K	NA	1
MSTRG.7699.1	i	chr12	74364699	74366488	MSTRG.7699	AC090502	yes	NA	NA	NA	NA	NA	MSTRG.7702.1	i	chr12	74398221	74399355	MSTRG.7702	AC090502	yes	novel	cis	100K	NA	0.881769
MSTRG.7701.1	i	chr12	74389769	74392232	MSTRG.7701	AC090502	yes	NA	NA	NA	NA	NA	MSTRG.7702.1	i	chr12	74398221	74399355	MSTRG.7702	AC090502	yes	novel	cis	10K	NA	0.882123
MSTRG.7700.1	i	chr12	74373282	74374071	MSTRG.7700	AC090502	yes	NA	NA	NA	NA	NA	MSTRG.7702.1	i	chr12	74398221	74399355	MSTRG.7702	AC090502	yes	novel	cis	100K	NA	0.817108
MSTRG.7702.1	i	chr12	74398221	74399355	MSTRG.7702	AC090502	yes	NA	NA	NA	NA	NA	MSTRG.7702.1	i	chr12	74398221	74399355	MSTRG.7702	AC090502	yes	novel	cis	1K	NA	1
MSTRG.34338.1	i	chrX	119318688	119318920	MSTRG.34338	AC004835	yes	NA	NA	NA	NA	NA	MSTRG.34338.1	i	chrX	119318688	119318920	MSTRG.34338	AC004835	yes	novel	cis	1K	NA	1
MSTRG.21297.1	i	chr21	38438761	38439493	MSTRG.21297	ERG	yes	NA	NA	NA	NA	NA	MSTRG.21297.1	i	chr21	38438761	38439493	MSTRG.21297	ERG	yes	novel	cis	1K	NA	1
MSTRG.25435.1	i	chr4	151314527	151318140	MSTRG.25435	SH3D19	yes	NA	NA	NA	NA	NA	MSTRG.25435.1	i	chr4	151314527	151318140	MSTRG.25435	SH3D19	yes	novel	cis	1K	NA	1
MSTRG.17837.1	u	chr2	6187011	6199791	MSTRG.17837	.	yes	NA	NA	NA	NA	NA	MSTRG.17837.1	u	chr2	6187011	6199791	MSTRG.17837	.	yes	novel	cis	1K	NA	1
MSTRG.33652.1	u	chrX	12943774	12944728	MSTRG.33652	.	yes	NA	NA	NA	NA	NA	MSTRG.33652.1	u	chrX	12943774	12944728	MSTRG.33652	.	yes	novel	cis	1K	NA	1
ENST00000586954	0	chr19	27775757	27793371	MSTRG.16967	LINC00662	yes	NA	NA	NA	NA	long intergenic non-protein coding RNA 662 [Source:HGNC Symbol;Acc:HGNC:27122]	MSTRG.16969.1	i	chr19	27774918	27775748	MSTRG.16969	LINC00662	yes	novel	cis	1K	NA	0.85074
ENST00000562493	0	chr19	27757184	27760849	MSTRG.16968	AC006504	yes	NA	NA	NA	NA	novel transcript	MSTRG.16969.1	i	chr19	27774918	27775748	MSTRG.16969	LINC00662	yes	novel	cis	100K	NA	0.958755
MSTRG.16969.1	i	chr19	27774918	27775748	MSTRG.16969	LINC00662	yes	NA	NA	NA	NA	NA	MSTRG.16969.1	i	chr19	27774918	27775748	MSTRG.16969	LINC00662	yes	novel	cis	1K	NA	1
MSTRG.23776.1	u	chr3	166425414	166426811	MSTRG.23776	.	yes	NA	NA	NA	NA	NA	MSTRG.23776.1	u	chr3	166425414	166426811	MSTRG.23776	.	yes	novel	cis	1K	NA	1
MSTRG.8843.3	j	chr13	67101018	67156931	MSTRG.8843	AL160254	yes	NA	NA	NA	NA	NA	MSTRG.8843.1	o	chr13	67100932	67157258	MSTRG.8843	AL160254	yes	novel	cis	1K	NA	0.984673
MSTRG.8844.1	i	chr13	67105754	67116243	MSTRG.8844	PCDH9	yes	NA	NA	NA	NA	NA	MSTRG.8843.1	o	chr13	67100932	67157258	MSTRG.8843	AL160254	yes	novel	cis	10K	NA	0.929173
MSTRG.8843.4	o	chr13	67116317	67141670	MSTRG.8843	AL160254	yes	NA	NA	NA	NA	NA	MSTRG.8843.1	o	chr13	67100932	67157258	MSTRG.8843	AL160254	yes	novel	cis	100K	NA	0.936583
MSTRG.8843.1	o	chr13	67100932	67157258	MSTRG.8843	AL160254	yes	NA	NA	NA	NA	NA	MSTRG.8843.1	o	chr13	67100932	67157258	MSTRG.8843	AL160254	yes	novel	cis	1K	NA	1
MSTRG.21001.1	o	chr21	6322664	6732072	MSTRG.21001	CBSL	yes	NA	NA	NA	NA	NA	MSTRG.21001.1	o	chr21	6322664	6732072	MSTRG.21001	CBSL	yes	novel	cis	1K	NA	1
MSTRG.5317.2	i	chr11	49324517	49326565	MSTRG.5317	AC118942	yes	NA	NA	NA	NA	NA	MSTRG.5317.2	i	chr11	49324517	49326565	MSTRG.5317	AC118942	yes	novel	cis	1K	NA	1
MSTRG.8153.1	i	chr12	116154817	116155848	MSTRG.8153	MED13L	yes	NA	NA	NA	NA	NA	MSTRG.8153.1	i	chr12	116154817	116155848	MSTRG.8153	MED13L	yes	novel	cis	1K	NA	1
MSTRG.20813.1	i	chr20	53017856	53019058	MSTRG.20813	TSHZ2	yes	NA	NA	NA	NA	NA	MSTRG.20813.1	i	chr20	53017856	53019058	MSTRG.20813	TSHZ2	yes	novel	cis	1K	NA	1
MSTRG.33601.1	u	chrX	4895886	4896651	MSTRG.33601	.	yes	NA	NA	NA	NA	NA	MSTRG.33601.1	u	chrX	4895886	4896651	MSTRG.33601	.	yes	novel	cis	1K	NA	1
MSTRG.33600.1	u	chrX	4894209	4894869	MSTRG.33600	.	yes	NA	NA	NA	NA	NA	MSTRG.33601.1	u	chrX	4895886	4896651	MSTRG.33601	.	yes	novel	cis	10K	NA	0.963104
MSTRG.15984.15	j	chr18	58624665	58629091	MSTRG.15984	ALPK2	yes	NA	NA	NA	NA	NA	MSTRG.15989.1	i	chr18	58618883	58621981	MSTRG.15989	ALPK2	yes	novel	cis	10K	NA	0.752453
MSTRG.15989.1	i	chr18	58618883	58621981	MSTRG.15989	ALPK2	yes	NA	NA	NA	NA	NA	MSTRG.15989.1	i	chr18	58618883	58621981	MSTRG.15989	ALPK2	yes	novel	cis	1K	NA	1
MSTRG.18948.1	u	chr2	113323972	113326138	MSTRG.18948	.	yes	NA	NA	NA	NA	NA	MSTRG.18948.1	u	chr2	113323972	113326138	MSTRG.18948	.	yes	novel	cis	1K	NA	1
MSTRG.33601.1	u	chrX	4895886	4896651	MSTRG.33601	.	yes	NA	NA	NA	NA	NA	MSTRG.33600.1	u	chrX	4894209	4894869	MSTRG.33600	.	yes	novel	cis	10K	NA	0.963104
MSTRG.33600.1	u	chrX	4894209	4894869	MSTRG.33600	.	yes	NA	NA	NA	NA	NA	MSTRG.33600.1	u	chrX	4894209	4894869	MSTRG.33600	.	yes	novel	cis	1K	NA	1
MSTRG.25353.1	i	chr4	145702143	145702514	MSTRG.25353	C4orf51	yes	NA	NA	NA	NA	NA	MSTRG.25353.1	i	chr4	145702143	145702514	MSTRG.25353	C4orf51	yes	novel	cis	1K	NA	1
MSTRG.29167.1	i	chr6	160365187	160366001	MSTRG.29167	SLC22A3	yes	NA	NA	NA	NA	NA	MSTRG.29166.3	j	chr6	160446709	160452941	MSTRG.29166	SLC22A3	yes	novel	cis	100K	NA	0.230588
MSTRG.29166.3	j	chr6	160446709	160452941	MSTRG.29166	SLC22A3	yes	NA	NA	NA	NA	NA	MSTRG.29166.3	j	chr6	160446709	160452941	MSTRG.29166	SLC22A3	yes	novel	cis	1K	NA	1
MSTRG.16339.4	u	chr19	5548902	5555054	MSTRG.16339	.	yes	NA	NA	NA	NA	NA	MSTRG.16339.5	u	chr19	5548902	5553151	MSTRG.16339	.	yes	novel	cis	1K	NA	0.422871
MSTRG.16339.5	u	chr19	5548902	5553151	MSTRG.16339	.	yes	NA	NA	NA	NA	NA	MSTRG.16339.5	u	chr19	5548902	5553151	MSTRG.16339	.	yes	novel	cis	1K	NA	1
MSTRG.7145.1	i	chr12	48346221	48346703	MSTRG.7145	ZNF641	yes	NA	NA	NA	NA	NA	MSTRG.7145.1	i	chr12	48346221	48346703	MSTRG.7145	ZNF641	yes	novel	cis	1K	NA	1
MSTRG.20176.1	i	chr20	379319	380571	MSTRG.20176	TRIB3	yes	NA	NA	NA	NA	NA	MSTRG.20176.1	i	chr20	379319	380571	MSTRG.20176	TRIB3	yes	novel	cis	1K	NA	1
ENST00000561500	0	chr16	69706996	69726506	MSTRG.12901	NQO1	yes	GO:0003723(RNA binding);GO:0003955(NAD(P)H dehydrogenase (quinone) activity);GO:0004128(cytochrome-b5 reductase activity, acting on NAD(P)H);GO:0004784(superoxide dismutase activity);GO:0005515(protein binding);GO:0005737(cytoplasm);GO:0005829(cytosol);GO:0006521(regulation of cellular amino acid metabolic process);GO:0006801(superoxide metabolic process);GO:0006805(xenobiotic metabolic process);…	00130(Ubiquinone and other terpenoid-quinone biosynthesis);05200(Pathways in cancer);05225(Hepatocellular carcinoma);05418(Fluid shear stress and atherosclerosis)	K00355	EC:1.6.5.2	NAD(P)H quinone dehydrogenase 1 [Source:HGNC Symbol;Acc:HGNC:2874]	MSTRG.12903.1	i	chr16	69716721	69717610	MSTRG.12903	NQO1	yes	novel	cis	10K	NA	0.18095
MSTRG.12903.1	i	chr16	69716721	69717610	MSTRG.12903	NQO1	yes	NA	NA	NA	NA	NA	MSTRG.12903.1	i	chr16	69716721	69717610	MSTRG.12903	NQO1	yes	novel	cis	1K	NA	1
MSTRG.27518.1	i	chr6	10796868	10798055	MSTRG.27518	AL024498	yes	NA	NA	NA	NA	NA	MSTRG.27518.1	i	chr6	10796868	10798055	MSTRG.27518	AL024498	yes	novel	cis	1K	NA	1
MSTRG.27292.1	o	chr5	179552195	179556167	MSTRG.27292	RUFY1	yes	NA	NA	NA	NA	NA	MSTRG.27286.1	u	chr5	179538439	179540956	MSTRG.27286	.	yes	novel	cis	100K	NA	-0.63908
MSTRG.27307.7	j	chr5	179614181	179623646	MSTRG.27307	HNRNPH1	yes	NA	NA	NA	NA	NA	MSTRG.27286.1	u	chr5	179538439	179540956	MSTRG.27286	.	yes	novel	cis	100K	NA	0.388081
MSTRG.27286.1	u	chr5	179538439	179540956	MSTRG.27286	.	yes	NA	NA	NA	NA	NA	MSTRG.27286.1	u	chr5	179538439	179540956	MSTRG.27286	.	yes	novel	cis	1K	NA	1
MSTRG.10276.20	j	chr14	104937255	104969967	MSTRG.10276	AHNAK2	yes	NA	NA	NA	NA	NA	MSTRG.10278.5	i	chr14	104945636	104951975	MSTRG.10278	AHNAK2	yes	novel	cis	10K	NA	0.543256
MSTRG.10276.17	j	chr14	104937255	104978305	MSTRG.10276	AHNAK2	yes	NA	NA	NA	NA	NA	MSTRG.10278.5	i	chr14	104945636	104951975	MSTRG.10278	AHNAK2	yes	novel	cis	10K	NA	0.879352
MSTRG.10279.1	i	chr14	104944646	104952921	MSTRG.10279	AHNAK2	yes	NA	NA	NA	NA	NA	MSTRG.10278.5	i	chr14	104945636	104951975	MSTRG.10278	AHNAK2	yes	novel	cis	1K	NA	0.638027
MSTRG.10278.3	i	chr14	104943452	104949480	MSTRG.10278	AHNAK2	yes	NA	NA	NA	NA	NA	MSTRG.10278.5	i	chr14	104945636	104951975	MSTRG.10278	AHNAK2	yes	novel	cis	10K	NA	0.873041
MSTRG.10276.16	j	chr14	104937255	104978305	MSTRG.10276	AHNAK2	yes	NA	NA	NA	NA	NA	MSTRG.10278.5	i	chr14	104945636	104951975	MSTRG.10278	AHNAK2	yes	novel	cis	10K	NA	0.734504
MSTRG.10276.15	j	chr14	104937254	104970698	MSTRG.10276	AHNAK2	yes	NA	NA	NA	NA	NA	MSTRG.10278.5	i	chr14	104945636	104951975	MSTRG.10278	AHNAK2	yes	novel	cis	10K	NA	0.667072
MSTRG.10276.18	j	chr14	104937255	104978305	MSTRG.10276	AHNAK2	yes	NA	NA	NA	NA	NA	MSTRG.10278.5	i	chr14	104945636	104951975	MSTRG.10278	AHNAK2	yes	novel	cis	10K	NA	0.752208
ENST00000555544	0	chr14	104953537	104955402	MSTRG.10276	AHNAK2	yes	GO:0005515(protein binding);GO:0005634(nucleus);GO:0005737(cytoplasm);GO:0005829(cytosol);GO:0005886(plasma membrane);GO:0030018(Z disc);GO:0030315(T-tubule);GO:0030659(cytoplasmic vesicle membrane);GO:0042383(sarcolemma);GO:0043034(costamere);GO:0043484(regulation of RNA splicing)	NA	NA	NA	AHNAK nucleoprotein 2 [Source:HGNC Symbol;Acc:HGNC:20125]	MSTRG.10278.5	i	chr14	104945636	104951975	MSTRG.10278	AHNAK2	yes	novel	cis	10K	NA	0.703694
MSTRG.10278.5	i	chr14	104945636	104951975	MSTRG.10278	AHNAK2	yes	NA	NA	NA	NA	NA	MSTRG.10278.5	i	chr14	104945636	104951975	MSTRG.10278	AHNAK2	yes	novel	cis	1K	NA	1
MSTRG.9375.1	u	chr14	35335142	35336688	MSTRG.9375	.	yes	NA	NA	NA	NA	NA	MSTRG.9375.1	u	chr14	35335142	35336688	MSTRG.9375	.	yes	novel	cis	1K	NA	1
