# Supplementary material for: Comprehensive analysis of TGF-β-induced mRNAs and ncRNAs in hepatocellular carcinoma
Source: Aging (Albany NY). 2020 Oct 4;12(19):19399–420. doi: 10.18632/aging.103826 (PMC7732333; doi:10.18632/aging.103826)
Supplement: Supplementary Table 8 [file aging-12-103826-s009..xlsx]

## Sheet: Sheet1
Supplementary Table 8. Global ceRNA networks according to the interaction mechanism of lncRNA-miRNA-mRNA and circRNA-miRNA-mRNA complexes.
RNA_class	RNA	miRNA	mRNA
lncRNA	.:MSTRG.23753.1	PC-3p-14255_149	ACTC1:ENST00000290378
lncRNA	.:MSTRG.23760.1	PC-3p-14255_149	ACTC1:ENST00000290378
lncRNA	.:MSTRG.23776.1	PC-3p-14255_149	ACTC1:ENST00000290378
lncRNA	.:MSTRG.25236.1	PC-3p-14255_149	ACTC1:ENST00000290378
lncRNA	.:MSTRG.25242.1	PC-3p-14255_149	ACTC1:ENST00000290378
lncRNA	AC008957:MSTRG.25927.2	PC-3p-14255_149	ACTC1:ENST00000290378
lncRNA	AC015712:ENST00000560068	PC-3p-14255_149	ACTC1:ENST00000290378
lncRNA	AC020978:ENST00000571197	PC-3p-14255_149	ACTC1:ENST00000290378
lncRNA	AC097478:MSTRG.24911.12	PC-3p-14255_149	ACTC1:ENST00000290378
lncRNA	AL160254:MSTRG.8843.4	PC-3p-14255_149	ACTC1:ENST00000290378
lncRNA	AL353997:ENST00000579352	PC-3p-14255_149	ACTC1:ENST00000290378
lncRNA	AL357033:ENST00000370520	PC-3p-14255_149	ACTC1:ENST00000290378
lncRNA	AL359220:ENST00000500036	PC-3p-14255_149	ACTC1:ENST00000290378
lncRNA	ALG1L6P:MSTRG.23013.2	PC-3p-14255_149	ACTC1:ENST00000290378
lncRNA	ARID5B:MSTRG.3874.1	PC-3p-14255_149	ACTC1:ENST00000290378
lncRNA	BRD3OS:MSTRG.33432.3	PC-3p-14255_149	ACTC1:ENST00000290378
lncRNA	CREB1:MSTRG.19830.16	PC-3p-14255_149	ACTC1:ENST00000290378
lncRNA	CYP4F26P:MSTRG.32430.3	PC-3p-14255_149	ACTC1:ENST00000290378
lncRNA	FENDRR:ENST00000598996	PC-3p-14255_149	ACTC1:ENST00000290378
lncRNA	FENDRR:ENST00000599749	PC-3p-14255_149	ACTC1:ENST00000290378
lncRNA	FENDRR:MSTRG.13193.9	PC-3p-14255_149	ACTC1:ENST00000290378
lncRNA	FENDRR:MSTRG.13194.1	PC-3p-14255_149	ACTC1:ENST00000290378
lncRNA	FOXQ1:MSTRG.27375.1	PC-3p-14255_149	ACTC1:ENST00000290378
lncRNA	HCP5:ENST00000541196	PC-3p-14255_149	ACTC1:ENST00000290378
lncRNA	HMGA2-AS1:ENST00000356215	PC-3p-14255_149	ACTC1:ENST00000290378
lncRNA	LEMD1:MSTRG.2799.1	PC-3p-14255_149	ACTC1:ENST00000290378
lncRNA	LEMD1:MSTRG.2802.1	PC-3p-14255_149	ACTC1:ENST00000290378
lncRNA	LINC00662:ENST00000586954	PC-3p-14255_149	ACTC1:ENST00000290378
lncRNA	LINC01291:ENST00000377469	PC-3p-14255_149	ACTC1:ENST00000290378
lncRNA	LINC02615:MSTRG.25231.1	PC-3p-14255_149	ACTC1:ENST00000290378
lncRNA	MALAT1:MSTRG.5556.14	PC-3p-14255_149	ACTC1:ENST00000290378
lncRNA	NFIA:MSTRG.1182.2	PC-3p-14255_149	ACTC1:ENST00000290378
lncRNA	PECAM1:MSTRG.14975.10	PC-3p-14255_149	ACTC1:ENST00000290378
lncRNA	RANBP3L:MSTRG.25925.5	PC-3p-14255_149	ACTC1:ENST00000290378
lncRNA	SGO1-AS1:MSTRG.22450.9	PC-3p-14255_149	ACTC1:ENST00000290378
lncRNA	SLC22A3:MSTRG.29166.3	PC-3p-14255_149	ACTC1:ENST00000290378
lncRNA	STARD4:MSTRG.26591.1	PC-3p-14255_149	ACTC1:ENST00000290378
lncRNA	TFAP2A-AS1:MSTRG.27487.2	PC-3p-14255_149	ACTC1:ENST00000290378
lncRNA	VRK2:MSTRG.18363.2	PC-3p-14255_149	ACTC1:ENST00000290378
lncRNA	WARS2-AS1:MSTRG.1790.9	PC-3p-14255_149	ACTC1:ENST00000290378
circRNA	ciRNA685	PC-3p-14255_149	ACTC1:ENST00000290378
circRNA	circRNA2527	PC-3p-14255_149	ACTC1:ENST00000290378
circRNA	circRNA2560	PC-3p-14255_149	ACTC1:ENST00000290378
circRNA	circRNA4749	PC-3p-14255_149	ACTC1:ENST00000290378
circRNA	circRNA4750	PC-3p-14255_149	ACTC1:ENST00000290378
circRNA	circRNA9874	PC-3p-14255_149	ACTC1:ENST00000290378
circRNA	hsa_circ_0000606	PC-3p-14255_149	ACTC1:ENST00000290378
circRNA	hsa_circ_0005332	PC-3p-14255_149	ACTC1:ENST00000290378
circRNA	hsa_circ_0008250	PC-3p-14255_149	ACTC1:ENST00000290378
circRNA	hsa_circ_0089274	PC-3p-14255_149	ACTC1:ENST00000290378
lncRNA	.:MSTRG.23753.1	PC-3p-14255_149	ANKRD1:ENST00000371697
lncRNA	.:MSTRG.23760.1	PC-3p-14255_149	ANKRD1:ENST00000371697
lncRNA	.:MSTRG.23776.1	PC-3p-14255_149	ANKRD1:ENST00000371697
lncRNA	.:MSTRG.25236.1	PC-3p-14255_149	ANKRD1:ENST00000371697
lncRNA	.:MSTRG.25242.1	PC-3p-14255_149	ANKRD1:ENST00000371697
lncRNA	AC008957:MSTRG.25927.2	PC-3p-14255_149	ANKRD1:ENST00000371697
lncRNA	AC015712:ENST00000560068	PC-3p-14255_149	ANKRD1:ENST00000371697
lncRNA	AC020978:ENST00000571197	PC-3p-14255_149	ANKRD1:ENST00000371697
lncRNA	AC097478:MSTRG.24911.12	PC-3p-14255_149	ANKRD1:ENST00000371697
lncRNA	AL160254:MSTRG.8843.4	PC-3p-14255_149	ANKRD1:ENST00000371697
lncRNA	AL353997:ENST00000579352	PC-3p-14255_149	ANKRD1:ENST00000371697
lncRNA	AL357033:ENST00000370520	PC-3p-14255_149	ANKRD1:ENST00000371697
lncRNA	AL359220:ENST00000500036	PC-3p-14255_149	ANKRD1:ENST00000371697
lncRNA	ALG1L6P:MSTRG.23013.2	PC-3p-14255_149	ANKRD1:ENST00000371697
lncRNA	ARID5B:MSTRG.3874.1	PC-3p-14255_149	ANKRD1:ENST00000371697
lncRNA	BRD3OS:MSTRG.33432.3	PC-3p-14255_149	ANKRD1:ENST00000371697
lncRNA	CREB1:MSTRG.19830.16	PC-3p-14255_149	ANKRD1:ENST00000371697
lncRNA	CYP4F26P:MSTRG.32430.3	PC-3p-14255_149	ANKRD1:ENST00000371697
lncRNA	FENDRR:ENST00000598996	PC-3p-14255_149	ANKRD1:ENST00000371697
lncRNA	FENDRR:ENST00000599749	PC-3p-14255_149	ANKRD1:ENST00000371697
lncRNA	FENDRR:MSTRG.13193.9	PC-3p-14255_149	ANKRD1:ENST00000371697
lncRNA	FENDRR:MSTRG.13194.1	PC-3p-14255_149	ANKRD1:ENST00000371697
lncRNA	FOXQ1:MSTRG.27375.1	PC-3p-14255_149	ANKRD1:ENST00000371697
lncRNA	HCP5:ENST00000541196	PC-3p-14255_149	ANKRD1:ENST00000371697
lncRNA	HMGA2-AS1:ENST00000356215	PC-3p-14255_149	ANKRD1:ENST00000371697
lncRNA	LEMD1:MSTRG.2799.1	PC-3p-14255_149	ANKRD1:ENST00000371697
lncRNA	LEMD1:MSTRG.2802.1	PC-3p-14255_149	ANKRD1:ENST00000371697
lncRNA	LINC00662:ENST00000586954	PC-3p-14255_149	ANKRD1:ENST00000371697
lncRNA	LINC01291:ENST00000377469	PC-3p-14255_149	ANKRD1:ENST00000371697
lncRNA	LINC02615:MSTRG.25231.1	PC-3p-14255_149	ANKRD1:ENST00000371697
lncRNA	MALAT1:MSTRG.5556.14	PC-3p-14255_149	ANKRD1:ENST00000371697
lncRNA	NFIA:MSTRG.1182.2	PC-3p-14255_149	ANKRD1:ENST00000371697
lncRNA	PECAM1:MSTRG.14975.10	PC-3p-14255_149	ANKRD1:ENST00000371697
lncRNA	RANBP3L:MSTRG.25925.5	PC-3p-14255_149	ANKRD1:ENST00000371697
lncRNA	SGO1-AS1:MSTRG.22450.9	PC-3p-14255_149	ANKRD1:ENST00000371697
lncRNA	SLC22A3:MSTRG.29166.3	PC-3p-14255_149	ANKRD1:ENST00000371697
lncRNA	STARD4:MSTRG.26591.1	PC-3p-14255_149	ANKRD1:ENST00000371697
lncRNA	TFAP2A-AS1:MSTRG.27487.2	PC-3p-14255_149	ANKRD1:ENST00000371697
lncRNA	VRK2:MSTRG.18363.2	PC-3p-14255_149	ANKRD1:ENST00000371697
lncRNA	WARS2-AS1:MSTRG.1790.9	PC-3p-14255_149	ANKRD1:ENST00000371697
circRNA	ciRNA685	PC-3p-14255_149	ANKRD1:ENST00000371697
circRNA	circRNA2527	PC-3p-14255_149	ANKRD1:ENST00000371697
circRNA	circRNA2560	PC-3p-14255_149	ANKRD1:ENST00000371697
circRNA	circRNA4749	PC-3p-14255_149	ANKRD1:ENST00000371697
circRNA	circRNA4750	PC-3p-14255_149	ANKRD1:ENST00000371697
circRNA	circRNA9874	PC-3p-14255_149	ANKRD1:ENST00000371697
circRNA	hsa_circ_0000606	PC-3p-14255_149	ANKRD1:ENST00000371697
circRNA	hsa_circ_0005332	PC-3p-14255_149	ANKRD1:ENST00000371697
circRNA	hsa_circ_0008250	PC-3p-14255_149	ANKRD1:ENST00000371697
circRNA	hsa_circ_0089274	PC-3p-14255_149	ANKRD1:ENST00000371697
lncRNA	.:MSTRG.23753.1	PC-3p-14255_149	ANXA8L1:ENST00000619162
lncRNA	.:MSTRG.23760.1	PC-3p-14255_149	ANXA8L1:ENST00000619162
lncRNA	.:MSTRG.23776.1	PC-3p-14255_149	ANXA8L1:ENST00000619162
lncRNA	.:MSTRG.25236.1	PC-3p-14255_149	ANXA8L1:ENST00000619162
lncRNA	.:MSTRG.25242.1	PC-3p-14255_149	ANXA8L1:ENST00000619162
lncRNA	AC008957:MSTRG.25927.2	PC-3p-14255_149	ANXA8L1:ENST00000619162
lncRNA	AC015712:ENST00000560068	PC-3p-14255_149	ANXA8L1:ENST00000619162
lncRNA	AC020978:ENST00000571197	PC-3p-14255_149	ANXA8L1:ENST00000619162
lncRNA	AC097478:MSTRG.24911.12	PC-3p-14255_149	ANXA8L1:ENST00000619162
lncRNA	AL160254:MSTRG.8843.4	PC-3p-14255_149	ANXA8L1:ENST00000619162
lncRNA	AL353997:ENST00000579352	PC-3p-14255_149	ANXA8L1:ENST00000619162
lncRNA	AL357033:ENST00000370520	PC-3p-14255_149	ANXA8L1:ENST00000619162
lncRNA	AL359220:ENST00000500036	PC-3p-14255_149	ANXA8L1:ENST00000619162
lncRNA	ALG1L6P:MSTRG.23013.2	PC-3p-14255_149	ANXA8L1:ENST00000619162
lncRNA	ARID5B:MSTRG.3874.1	PC-3p-14255_149	ANXA8L1:ENST00000619162
lncRNA	BRD3OS:MSTRG.33432.3	PC-3p-14255_149	ANXA8L1:ENST00000619162
lncRNA	CREB1:MSTRG.19830.16	PC-3p-14255_149	ANXA8L1:ENST00000619162
lncRNA	CYP4F26P:MSTRG.32430.3	PC-3p-14255_149	ANXA8L1:ENST00000619162
lncRNA	FENDRR:ENST00000598996	PC-3p-14255_149	ANXA8L1:ENST00000619162
lncRNA	FENDRR:ENST00000599749	PC-3p-14255_149	ANXA8L1:ENST00000619162
lncRNA	FENDRR:MSTRG.13193.9	PC-3p-14255_149	ANXA8L1:ENST00000619162
lncRNA	FENDRR:MSTRG.13194.1	PC-3p-14255_149	ANXA8L1:ENST00000619162
lncRNA	FOXQ1:MSTRG.27375.1	PC-3p-14255_149	ANXA8L1:ENST00000619162
lncRNA	HCP5:ENST00000541196	PC-3p-14255_149	ANXA8L1:ENST00000619162
lncRNA	HMGA2-AS1:ENST00000356215	PC-3p-14255_149	ANXA8L1:ENST00000619162
lncRNA	LEMD1:MSTRG.2799.1	PC-3p-14255_149	ANXA8L1:ENST00000619162
lncRNA	LEMD1:MSTRG.2802.1	PC-3p-14255_149	ANXA8L1:ENST00000619162
lncRNA	LINC00662:ENST00000586954	PC-3p-14255_149	ANXA8L1:ENST00000619162
lncRNA	LINC01291:ENST00000377469	PC-3p-14255_149	ANXA8L1:ENST00000619162
lncRNA	LINC02615:MSTRG.25231.1	PC-3p-14255_149	ANXA8L1:ENST00000619162
lncRNA	MALAT1:MSTRG.5556.14	PC-3p-14255_149	ANXA8L1:ENST00000619162
lncRNA	NFIA:MSTRG.1182.2	PC-3p-14255_149	ANXA8L1:ENST00000619162
lncRNA	PECAM1:MSTRG.14975.10	PC-3p-14255_149	ANXA8L1:ENST00000619162
lncRNA	RANBP3L:MSTRG.25925.5	PC-3p-14255_149	ANXA8L1:ENST00000619162
lncRNA	SGO1-AS1:MSTRG.22450.9	PC-3p-14255_149	ANXA8L1:ENST00000619162
lncRNA	SLC22A3:MSTRG.29166.3	PC-3p-14255_149	ANXA8L1:ENST00000619162
lncRNA	STARD4:MSTRG.26591.1	PC-3p-14255_149	ANXA8L1:ENST00000619162
lncRNA	TFAP2A-AS1:MSTRG.27487.2	PC-3p-14255_149	ANXA8L1:ENST00000619162
lncRNA	VRK2:MSTRG.18363.2	PC-3p-14255_149	ANXA8L1:ENST00000619162
lncRNA	WARS2-AS1:MSTRG.1790.9	PC-3p-14255_149	ANXA8L1:ENST00000619162
circRNA	ciRNA685	PC-3p-14255_149	ANXA8L1:ENST00000619162
circRNA	circRNA2527	PC-3p-14255_149	ANXA8L1:ENST00000619162
circRNA	circRNA2560	PC-3p-14255_149	ANXA8L1:ENST00000619162
circRNA	circRNA4749	PC-3p-14255_149	ANXA8L1:ENST00000619162
circRNA	circRNA4750	PC-3p-14255_149	ANXA8L1:ENST00000619162
circRNA	circRNA9874	PC-3p-14255_149	ANXA8L1:ENST00000619162
circRNA	hsa_circ_0000606	PC-3p-14255_149	ANXA8L1:ENST00000619162
circRNA	hsa_circ_0005332	PC-3p-14255_149	ANXA8L1:ENST00000619162
circRNA	hsa_circ_0008250	PC-3p-14255_149	ANXA8L1:ENST00000619162
circRNA	hsa_circ_0089274	PC-3p-14255_149	ANXA8L1:ENST00000619162
lncRNA	.:MSTRG.23753.1	PC-3p-14255_149	APOL2:ENST00000358502
lncRNA	.:MSTRG.23760.1	PC-3p-14255_149	APOL2:ENST00000358502
lncRNA	.:MSTRG.23776.1	PC-3p-14255_149	APOL2:ENST00000358502
lncRNA	.:MSTRG.25236.1	PC-3p-14255_149	APOL2:ENST00000358502
lncRNA	.:MSTRG.25242.1	PC-3p-14255_149	APOL2:ENST00000358502
lncRNA	AC008957:MSTRG.25927.2	PC-3p-14255_149	APOL2:ENST00000358502
lncRNA	AC015712:ENST00000560068	PC-3p-14255_149	APOL2:ENST00000358502
lncRNA	AC020978:ENST00000571197	PC-3p-14255_149	APOL2:ENST00000358502
lncRNA	AC097478:MSTRG.24911.12	PC-3p-14255_149	APOL2:ENST00000358502
lncRNA	AL160254:MSTRG.8843.4	PC-3p-14255_149	APOL2:ENST00000358502
lncRNA	AL353997:ENST00000579352	PC-3p-14255_149	APOL2:ENST00000358502
lncRNA	AL357033:ENST00000370520	PC-3p-14255_149	APOL2:ENST00000358502
lncRNA	AL359220:ENST00000500036	PC-3p-14255_149	APOL2:ENST00000358502
lncRNA	ALG1L6P:MSTRG.23013.2	PC-3p-14255_149	APOL2:ENST00000358502
lncRNA	ARID5B:MSTRG.3874.1	PC-3p-14255_149	APOL2:ENST00000358502
lncRNA	BRD3OS:MSTRG.33432.3	PC-3p-14255_149	APOL2:ENST00000358502
lncRNA	CREB1:MSTRG.19830.16	PC-3p-14255_149	APOL2:ENST00000358502
lncRNA	CYP4F26P:MSTRG.32430.3	PC-3p-14255_149	APOL2:ENST00000358502
lncRNA	FENDRR:ENST00000598996	PC-3p-14255_149	APOL2:ENST00000358502
lncRNA	FENDRR:ENST00000599749	PC-3p-14255_149	APOL2:ENST00000358502
lncRNA	FENDRR:MSTRG.13193.9	PC-3p-14255_149	APOL2:ENST00000358502
lncRNA	FENDRR:MSTRG.13194.1	PC-3p-14255_149	APOL2:ENST00000358502
lncRNA	FOXQ1:MSTRG.27375.1	PC-3p-14255_149	APOL2:ENST00000358502
lncRNA	HCP5:ENST00000541196	PC-3p-14255_149	APOL2:ENST00000358502
lncRNA	HMGA2-AS1:ENST00000356215	PC-3p-14255_149	APOL2:ENST00000358502
lncRNA	LEMD1:MSTRG.2799.1	PC-3p-14255_149	APOL2:ENST00000358502
lncRNA	LEMD1:MSTRG.2802.1	PC-3p-14255_149	APOL2:ENST00000358502
lncRNA	LINC00662:ENST00000586954	PC-3p-14255_149	APOL2:ENST00000358502
lncRNA	LINC01291:ENST00000377469	PC-3p-14255_149	APOL2:ENST00000358502
lncRNA	LINC02615:MSTRG.25231.1	PC-3p-14255_149	APOL2:ENST00000358502
lncRNA	MALAT1:MSTRG.5556.14	PC-3p-14255_149	APOL2:ENST00000358502
lncRNA	NFIA:MSTRG.1182.2	PC-3p-14255_149	APOL2:ENST00000358502
lncRNA	PECAM1:MSTRG.14975.10	PC-3p-14255_149	APOL2:ENST00000358502
lncRNA	RANBP3L:MSTRG.25925.5	PC-3p-14255_149	APOL2:ENST00000358502
lncRNA	SGO1-AS1:MSTRG.22450.9	PC-3p-14255_149	APOL2:ENST00000358502
lncRNA	SLC22A3:MSTRG.29166.3	PC-3p-14255_149	APOL2:ENST00000358502
lncRNA	STARD4:MSTRG.26591.1	PC-3p-14255_149	APOL2:ENST00000358502
lncRNA	TFAP2A-AS1:MSTRG.27487.2	PC-3p-14255_149	APOL2:ENST00000358502
lncRNA	VRK2:MSTRG.18363.2	PC-3p-14255_149	APOL2:ENST00000358502
lncRNA	WARS2-AS1:MSTRG.1790.9	PC-3p-14255_149	APOL2:ENST00000358502
circRNA	ciRNA685	PC-3p-14255_149	APOL2:ENST00000358502
circRNA	circRNA2527	PC-3p-14255_149	APOL2:ENST00000358502
circRNA	circRNA2560	PC-3p-14255_149	APOL2:ENST00000358502
circRNA	circRNA4749	PC-3p-14255_149	APOL2:ENST00000358502
circRNA	circRNA4750	PC-3p-14255_149	APOL2:ENST00000358502
circRNA	circRNA9874	PC-3p-14255_149	APOL2:ENST00000358502
circRNA	hsa_circ_0000606	PC-3p-14255_149	APOL2:ENST00000358502
circRNA	hsa_circ_0005332	PC-3p-14255_149	APOL2:ENST00000358502
circRNA	hsa_circ_0008250	PC-3p-14255_149	APOL2:ENST00000358502
circRNA	hsa_circ_0089274	PC-3p-14255_149	APOL2:ENST00000358502
lncRNA	.:MSTRG.23753.1	PC-3p-14255_149	ARNTL2:ENST00000544915
lncRNA	.:MSTRG.23760.1	PC-3p-14255_149	ARNTL2:ENST00000544915
lncRNA	.:MSTRG.23776.1	PC-3p-14255_149	ARNTL2:ENST00000544915
lncRNA	.:MSTRG.25236.1	PC-3p-14255_149	ARNTL2:ENST00000544915
lncRNA	.:MSTRG.25242.1	PC-3p-14255_149	ARNTL2:ENST00000544915
lncRNA	AC008957:MSTRG.25927.2	PC-3p-14255_149	ARNTL2:ENST00000544915
lncRNA	AC015712:ENST00000560068	PC-3p-14255_149	ARNTL2:ENST00000544915
lncRNA	AC020978:ENST00000571197	PC-3p-14255_149	ARNTL2:ENST00000544915
lncRNA	AC097478:MSTRG.24911.12	PC-3p-14255_149	ARNTL2:ENST00000544915
lncRNA	AL160254:MSTRG.8843.4	PC-3p-14255_149	ARNTL2:ENST00000544915
lncRNA	AL353997:ENST00000579352	PC-3p-14255_149	ARNTL2:ENST00000544915
lncRNA	AL357033:ENST00000370520	PC-3p-14255_149	ARNTL2:ENST00000544915
lncRNA	AL359220:ENST00000500036	PC-3p-14255_149	ARNTL2:ENST00000544915
lncRNA	ALG1L6P:MSTRG.23013.2	PC-3p-14255_149	ARNTL2:ENST00000544915
lncRNA	ARID5B:MSTRG.3874.1	PC-3p-14255_149	ARNTL2:ENST00000544915
lncRNA	BRD3OS:MSTRG.33432.3	PC-3p-14255_149	ARNTL2:ENST00000544915
lncRNA	CREB1:MSTRG.19830.16	PC-3p-14255_149	ARNTL2:ENST00000544915
lncRNA	CYP4F26P:MSTRG.32430.3	PC-3p-14255_149	ARNTL2:ENST00000544915
lncRNA	FENDRR:ENST00000598996	PC-3p-14255_149	ARNTL2:ENST00000544915
lncRNA	FENDRR:ENST00000599749	PC-3p-14255_149	ARNTL2:ENST00000544915
lncRNA	FENDRR:MSTRG.13193.9	PC-3p-14255_149	ARNTL2:ENST00000544915
lncRNA	FENDRR:MSTRG.13194.1	PC-3p-14255_149	ARNTL2:ENST00000544915
lncRNA	FOXQ1:MSTRG.27375.1	PC-3p-14255_149	ARNTL2:ENST00000544915
lncRNA	HCP5:ENST00000541196	PC-3p-14255_149	ARNTL2:ENST00000544915
lncRNA	HMGA2-AS1:ENST00000356215	PC-3p-14255_149	ARNTL2:ENST00000544915
lncRNA	LEMD1:MSTRG.2799.1	PC-3p-14255_149	ARNTL2:ENST00000544915
lncRNA	LEMD1:MSTRG.2802.1	PC-3p-14255_149	ARNTL2:ENST00000544915
lncRNA	LINC00662:ENST00000586954	PC-3p-14255_149	ARNTL2:ENST00000544915
lncRNA	LINC01291:ENST00000377469	PC-3p-14255_149	ARNTL2:ENST00000544915
lncRNA	LINC02615:MSTRG.25231.1	PC-3p-14255_149	ARNTL2:ENST00000544915
lncRNA	MALAT1:MSTRG.5556.14	PC-3p-14255_149	ARNTL2:ENST00000544915
lncRNA	NFIA:MSTRG.1182.2	PC-3p-14255_149	ARNTL2:ENST00000544915
lncRNA	PECAM1:MSTRG.14975.10	PC-3p-14255_149	ARNTL2:ENST00000544915
lncRNA	RANBP3L:MSTRG.25925.5	PC-3p-14255_149	ARNTL2:ENST00000544915
lncRNA	SGO1-AS1:MSTRG.22450.9	PC-3p-14255_149	ARNTL2:ENST00000544915
lncRNA	SLC22A3:MSTRG.29166.3	PC-3p-14255_149	ARNTL2:ENST00000544915
lncRNA	STARD4:MSTRG.26591.1	PC-3p-14255_149	ARNTL2:ENST00000544915
lncRNA	TFAP2A-AS1:MSTRG.27487.2	PC-3p-14255_149	ARNTL2:ENST00000544915
lncRNA	VRK2:MSTRG.18363.2	PC-3p-14255_149	ARNTL2:ENST00000544915
lncRNA	WARS2-AS1:MSTRG.1790.9	PC-3p-14255_149	ARNTL2:ENST00000544915
circRNA	ciRNA685	PC-3p-14255_149	ARNTL2:ENST00000544915
circRNA	circRNA2527	PC-3p-14255_149	ARNTL2:ENST00000544915
circRNA	circRNA2560	PC-3p-14255_149	ARNTL2:ENST00000544915
circRNA	circRNA4749	PC-3p-14255_149	ARNTL2:ENST00000544915
circRNA	circRNA4750	PC-3p-14255_149	ARNTL2:ENST00000544915
circRNA	circRNA9874	PC-3p-14255_149	ARNTL2:ENST00000544915
circRNA	hsa_circ_0000606	PC-3p-14255_149	ARNTL2:ENST00000544915
circRNA	hsa_circ_0005332	PC-3p-14255_149	ARNTL2:ENST00000544915
circRNA	hsa_circ_0008250	PC-3p-14255_149	ARNTL2:ENST00000544915
circRNA	hsa_circ_0089274	PC-3p-14255_149	ARNTL2:ENST00000544915
lncRNA	.:MSTRG.23753.1	PC-3p-14255_149	BRCA1:ENST00000468300
lncRNA	.:MSTRG.23760.1	PC-3p-14255_149	BRCA1:ENST00000468300
lncRNA	.:MSTRG.23776.1	PC-3p-14255_149	BRCA1:ENST00000468300
lncRNA	.:MSTRG.25236.1	PC-3p-14255_149	BRCA1:ENST00000468300
lncRNA	.:MSTRG.25242.1	PC-3p-14255_149	BRCA1:ENST00000468300
lncRNA	AC008957:MSTRG.25927.2	PC-3p-14255_149	BRCA1:ENST00000468300
lncRNA	AC015712:ENST00000560068	PC-3p-14255_149	BRCA1:ENST00000468300
lncRNA	AC020978:ENST00000571197	PC-3p-14255_149	BRCA1:ENST00000468300
lncRNA	AC097478:MSTRG.24911.12	PC-3p-14255_149	BRCA1:ENST00000468300
lncRNA	AL160254:MSTRG.8843.4	PC-3p-14255_149	BRCA1:ENST00000468300
lncRNA	AL353997:ENST00000579352	PC-3p-14255_149	BRCA1:ENST00000468300
lncRNA	AL357033:ENST00000370520	PC-3p-14255_149	BRCA1:ENST00000468300
lncRNA	AL359220:ENST00000500036	PC-3p-14255_149	BRCA1:ENST00000468300
lncRNA	ALG1L6P:MSTRG.23013.2	PC-3p-14255_149	BRCA1:ENST00000468300
lncRNA	ARID5B:MSTRG.3874.1	PC-3p-14255_149	BRCA1:ENST00000468300
lncRNA	BRD3OS:MSTRG.33432.3	PC-3p-14255_149	BRCA1:ENST00000468300
lncRNA	CREB1:MSTRG.19830.16	PC-3p-14255_149	BRCA1:ENST00000468300
lncRNA	CYP4F26P:MSTRG.32430.3	PC-3p-14255_149	BRCA1:ENST00000468300
lncRNA	FENDRR:ENST00000598996	PC-3p-14255_149	BRCA1:ENST00000468300
lncRNA	FENDRR:ENST00000599749	PC-3p-14255_149	BRCA1:ENST00000468300
lncRNA	FENDRR:MSTRG.13193.9	PC-3p-14255_149	BRCA1:ENST00000468300
lncRNA	FENDRR:MSTRG.13194.1	PC-3p-14255_149	BRCA1:ENST00000468300
lncRNA	FOXQ1:MSTRG.27375.1	PC-3p-14255_149	BRCA1:ENST00000468300
lncRNA	HCP5:ENST00000541196	PC-3p-14255_149	BRCA1:ENST00000468300
lncRNA	HMGA2-AS1:ENST00000356215	PC-3p-14255_149	BRCA1:ENST00000468300
lncRNA	LEMD1:MSTRG.2799.1	PC-3p-14255_149	BRCA1:ENST00000468300
lncRNA	LEMD1:MSTRG.2802.1	PC-3p-14255_149	BRCA1:ENST00000468300
lncRNA	LINC00662:ENST00000586954	PC-3p-14255_149	BRCA1:ENST00000468300
lncRNA	LINC01291:ENST00000377469	PC-3p-14255_149	BRCA1:ENST00000468300
lncRNA	LINC02615:MSTRG.25231.1	PC-3p-14255_149	BRCA1:ENST00000468300
lncRNA	MALAT1:MSTRG.5556.14	PC-3p-14255_149	BRCA1:ENST00000468300
lncRNA	NFIA:MSTRG.1182.2	PC-3p-14255_149	BRCA1:ENST00000468300
lncRNA	PECAM1:MSTRG.14975.10	PC-3p-14255_149	BRCA1:ENST00000468300
lncRNA	RANBP3L:MSTRG.25925.5	PC-3p-14255_149	BRCA1:ENST00000468300
lncRNA	SGO1-AS1:MSTRG.22450.9	PC-3p-14255_149	BRCA1:ENST00000468300
lncRNA	SLC22A3:MSTRG.29166.3	PC-3p-14255_149	BRCA1:ENST00000468300
lncRNA	STARD4:MSTRG.26591.1	PC-3p-14255_149	BRCA1:ENST00000468300
lncRNA	TFAP2A-AS1:MSTRG.27487.2	PC-3p-14255_149	BRCA1:ENST00000468300
lncRNA	VRK2:MSTRG.18363.2	PC-3p-14255_149	BRCA1:ENST00000468300
lncRNA	WARS2-AS1:MSTRG.1790.9	PC-3p-14255_149	BRCA1:ENST00000468300
circRNA	ciRNA685	PC-3p-14255_149	BRCA1:ENST00000468300
circRNA	circRNA2527	PC-3p-14255_149	BRCA1:ENST00000468300
circRNA	circRNA2560	PC-3p-14255_149	BRCA1:ENST00000468300
circRNA	circRNA4749	PC-3p-14255_149	BRCA1:ENST00000468300
circRNA	circRNA4750	PC-3p-14255_149	BRCA1:ENST00000468300
circRNA	circRNA9874	PC-3p-14255_149	BRCA1:ENST00000468300
circRNA	hsa_circ_0000606	PC-3p-14255_149	BRCA1:ENST00000468300
circRNA	hsa_circ_0005332	PC-3p-14255_149	BRCA1:ENST00000468300
circRNA	hsa_circ_0008250	PC-3p-14255_149	BRCA1:ENST00000468300
circRNA	hsa_circ_0089274	PC-3p-14255_149	BRCA1:ENST00000468300
lncRNA	.:MSTRG.23753.1	PC-3p-14255_149	C11orf65:ENST00000527531
lncRNA	.:MSTRG.23760.1	PC-3p-14255_149	C11orf65:ENST00000527531
lncRNA	.:MSTRG.23776.1	PC-3p-14255_149	C11orf65:ENST00000527531
lncRNA	.:MSTRG.25236.1	PC-3p-14255_149	C11orf65:ENST00000527531
lncRNA	.:MSTRG.25242.1	PC-3p-14255_149	C11orf65:ENST00000527531
lncRNA	AC008957:MSTRG.25927.2	PC-3p-14255_149	C11orf65:ENST00000527531
lncRNA	AC015712:ENST00000560068	PC-3p-14255_149	C11orf65:ENST00000527531
lncRNA	AC020978:ENST00000571197	PC-3p-14255_149	C11orf65:ENST00000527531
lncRNA	AC097478:MSTRG.24911.12	PC-3p-14255_149	C11orf65:ENST00000527531
lncRNA	AL160254:MSTRG.8843.4	PC-3p-14255_149	C11orf65:ENST00000527531
lncRNA	AL353997:ENST00000579352	PC-3p-14255_149	C11orf65:ENST00000527531
lncRNA	AL357033:ENST00000370520	PC-3p-14255_149	C11orf65:ENST00000527531
lncRNA	AL359220:ENST00000500036	PC-3p-14255_149	C11orf65:ENST00000527531
lncRNA	ALG1L6P:MSTRG.23013.2	PC-3p-14255_149	C11orf65:ENST00000527531
lncRNA	ARID5B:MSTRG.3874.1	PC-3p-14255_149	C11orf65:ENST00000527531
lncRNA	BRD3OS:MSTRG.33432.3	PC-3p-14255_149	C11orf65:ENST00000527531
lncRNA	CREB1:MSTRG.19830.16	PC-3p-14255_149	C11orf65:ENST00000527531
lncRNA	CYP4F26P:MSTRG.32430.3	PC-3p-14255_149	C11orf65:ENST00000527531
lncRNA	FENDRR:ENST00000598996	PC-3p-14255_149	C11orf65:ENST00000527531
lncRNA	FENDRR:ENST00000599749	PC-3p-14255_149	C11orf65:ENST00000527531
lncRNA	FENDRR:MSTRG.13193.9	PC-3p-14255_149	C11orf65:ENST00000527531
lncRNA	FENDRR:MSTRG.13194.1	PC-3p-14255_149	C11orf65:ENST00000527531
lncRNA	FOXQ1:MSTRG.27375.1	PC-3p-14255_149	C11orf65:ENST00000527531
lncRNA	HCP5:ENST00000541196	PC-3p-14255_149	C11orf65:ENST00000527531
lncRNA	HMGA2-AS1:ENST00000356215	PC-3p-14255_149	C11orf65:ENST00000527531
lncRNA	LEMD1:MSTRG.2799.1	PC-3p-14255_149	C11orf65:ENST00000527531
lncRNA	LEMD1:MSTRG.2802.1	PC-3p-14255_149	C11orf65:ENST00000527531
lncRNA	LINC00662:ENST00000586954	PC-3p-14255_149	C11orf65:ENST00000527531
lncRNA	LINC01291:ENST00000377469	PC-3p-14255_149	C11orf65:ENST00000527531
lncRNA	LINC02615:MSTRG.25231.1	PC-3p-14255_149	C11orf65:ENST00000527531
lncRNA	MALAT1:MSTRG.5556.14	PC-3p-14255_149	C11orf65:ENST00000527531
lncRNA	NFIA:MSTRG.1182.2	PC-3p-14255_149	C11orf65:ENST00000527531
lncRNA	PECAM1:MSTRG.14975.10	PC-3p-14255_149	C11orf65:ENST00000527531
lncRNA	RANBP3L:MSTRG.25925.5	PC-3p-14255_149	C11orf65:ENST00000527531
lncRNA	SGO1-AS1:MSTRG.22450.9	PC-3p-14255_149	C11orf65:ENST00000527531
lncRNA	SLC22A3:MSTRG.29166.3	PC-3p-14255_149	C11orf65:ENST00000527531
lncRNA	STARD4:MSTRG.26591.1	PC-3p-14255_149	C11orf65:ENST00000527531
lncRNA	TFAP2A-AS1:MSTRG.27487.2	PC-3p-14255_149	C11orf65:ENST00000527531
lncRNA	VRK2:MSTRG.18363.2	PC-3p-14255_149	C11orf65:ENST00000527531
lncRNA	WARS2-AS1:MSTRG.1790.9	PC-3p-14255_149	C11orf65:ENST00000527531
circRNA	ciRNA685	PC-3p-14255_149	C11orf65:ENST00000527531
circRNA	circRNA2527	PC-3p-14255_149	C11orf65:ENST00000527531
circRNA	circRNA2560	PC-3p-14255_149	C11orf65:ENST00000527531
circRNA	circRNA4749	PC-3p-14255_149	C11orf65:ENST00000527531
circRNA	circRNA4750	PC-3p-14255_149	C11orf65:ENST00000527531
circRNA	circRNA9874	PC-3p-14255_149	C11orf65:ENST00000527531
circRNA	hsa_circ_0000606	PC-3p-14255_149	C11orf65:ENST00000527531
circRNA	hsa_circ_0005332	PC-3p-14255_149	C11orf65:ENST00000527531
circRNA	hsa_circ_0008250	PC-3p-14255_149	C11orf65:ENST00000527531
circRNA	hsa_circ_0089274	PC-3p-14255_149	C11orf65:ENST00000527531
lncRNA	.:MSTRG.23753.1	PC-3p-14255_149	C5orf22:ENST00000510659
lncRNA	.:MSTRG.23760.1	PC-3p-14255_149	C5orf22:ENST00000510659
lncRNA	.:MSTRG.23776.1	PC-3p-14255_149	C5orf22:ENST00000510659
lncRNA	.:MSTRG.25236.1	PC-3p-14255_149	C5orf22:ENST00000510659
lncRNA	.:MSTRG.25242.1	PC-3p-14255_149	C5orf22:ENST00000510659
lncRNA	AC008957:MSTRG.25927.2	PC-3p-14255_149	C5orf22:ENST00000510659
lncRNA	AC015712:ENST00000560068	PC-3p-14255_149	C5orf22:ENST00000510659
lncRNA	AC020978:ENST00000571197	PC-3p-14255_149	C5orf22:ENST00000510659
lncRNA	AC097478:MSTRG.24911.12	PC-3p-14255_149	C5orf22:ENST00000510659
lncRNA	AL160254:MSTRG.8843.4	PC-3p-14255_149	C5orf22:ENST00000510659
lncRNA	AL353997:ENST00000579352	PC-3p-14255_149	C5orf22:ENST00000510659
lncRNA	AL357033:ENST00000370520	PC-3p-14255_149	C5orf22:ENST00000510659
lncRNA	AL359220:ENST00000500036	PC-3p-14255_149	C5orf22:ENST00000510659
lncRNA	ALG1L6P:MSTRG.23013.2	PC-3p-14255_149	C5orf22:ENST00000510659
lncRNA	ARID5B:MSTRG.3874.1	PC-3p-14255_149	C5orf22:ENST00000510659
lncRNA	BRD3OS:MSTRG.33432.3	PC-3p-14255_149	C5orf22:ENST00000510659
lncRNA	CREB1:MSTRG.19830.16	PC-3p-14255_149	C5orf22:ENST00000510659
lncRNA	CYP4F26P:MSTRG.32430.3	PC-3p-14255_149	C5orf22:ENST00000510659
lncRNA	FENDRR:ENST00000598996	PC-3p-14255_149	C5orf22:ENST00000510659
lncRNA	FENDRR:ENST00000599749	PC-3p-14255_149	C5orf22:ENST00000510659
lncRNA	FENDRR:MSTRG.13193.9	PC-3p-14255_149	C5orf22:ENST00000510659
lncRNA	FENDRR:MSTRG.13194.1	PC-3p-14255_149	C5orf22:ENST00000510659
lncRNA	FOXQ1:MSTRG.27375.1	PC-3p-14255_149	C5orf22:ENST00000510659
lncRNA	HCP5:ENST00000541196	PC-3p-14255_149	C5orf22:ENST00000510659
lncRNA	HMGA2-AS1:ENST00000356215	PC-3p-14255_149	C5orf22:ENST00000510659
lncRNA	LEMD1:MSTRG.2799.1	PC-3p-14255_149	C5orf22:ENST00000510659
lncRNA	LEMD1:MSTRG.2802.1	PC-3p-14255_149	C5orf22:ENST00000510659
lncRNA	LINC00662:ENST00000586954	PC-3p-14255_149	C5orf22:ENST00000510659
lncRNA	LINC01291:ENST00000377469	PC-3p-14255_149	C5orf22:ENST00000510659
lncRNA	LINC02615:MSTRG.25231.1	PC-3p-14255_149	C5orf22:ENST00000510659
lncRNA	MALAT1:MSTRG.5556.14	PC-3p-14255_149	C5orf22:ENST00000510659
lncRNA	NFIA:MSTRG.1182.2	PC-3p-14255_149	C5orf22:ENST00000510659
lncRNA	PECAM1:MSTRG.14975.10	PC-3p-14255_149	C5orf22:ENST00000510659
lncRNA	RANBP3L:MSTRG.25925.5	PC-3p-14255_149	C5orf22:ENST00000510659
lncRNA	SGO1-AS1:MSTRG.22450.9	PC-3p-14255_149	C5orf22:ENST00000510659
lncRNA	SLC22A3:MSTRG.29166.3	PC-3p-14255_149	C5orf22:ENST00000510659
lncRNA	STARD4:MSTRG.26591.1	PC-3p-14255_149	C5orf22:ENST00000510659
lncRNA	TFAP2A-AS1:MSTRG.27487.2	PC-3p-14255_149	C5orf22:ENST00000510659
lncRNA	VRK2:MSTRG.18363.2	PC-3p-14255_149	C5orf22:ENST00000510659
lncRNA	WARS2-AS1:MSTRG.1790.9	PC-3p-14255_149	C5orf22:ENST00000510659
circRNA	ciRNA685	PC-3p-14255_149	C5orf22:ENST00000510659
circRNA	circRNA2527	PC-3p-14255_149	C5orf22:ENST00000510659
circRNA	circRNA2560	PC-3p-14255_149	C5orf22:ENST00000510659
circRNA	circRNA4749	PC-3p-14255_149	C5orf22:ENST00000510659
circRNA	circRNA4750	PC-3p-14255_149	C5orf22:ENST00000510659
circRNA	circRNA9874	PC-3p-14255_149	C5orf22:ENST00000510659
circRNA	hsa_circ_0000606	PC-3p-14255_149	C5orf22:ENST00000510659
circRNA	hsa_circ_0005332	PC-3p-14255_149	C5orf22:ENST00000510659
circRNA	hsa_circ_0008250	PC-3p-14255_149	C5orf22:ENST00000510659
circRNA	hsa_circ_0089274	PC-3p-14255_149	C5orf22:ENST00000510659
lncRNA	.:MSTRG.23753.1	PC-3p-14255_149	CACNB2:ENST00000324631
lncRNA	.:MSTRG.23760.1	PC-3p-14255_149	CACNB2:ENST00000324631
lncRNA	.:MSTRG.23776.1	PC-3p-14255_149	CACNB2:ENST00000324631
lncRNA	.:MSTRG.25236.1	PC-3p-14255_149	CACNB2:ENST00000324631
lncRNA	.:MSTRG.25242.1	PC-3p-14255_149	CACNB2:ENST00000324631
lncRNA	AC008957:MSTRG.25927.2	PC-3p-14255_149	CACNB2:ENST00000324631
lncRNA	AC015712:ENST00000560068	PC-3p-14255_149	CACNB2:ENST00000324631
lncRNA	AC020978:ENST00000571197	PC-3p-14255_149	CACNB2:ENST00000324631
lncRNA	AC097478:MSTRG.24911.12	PC-3p-14255_149	CACNB2:ENST00000324631
lncRNA	AL160254:MSTRG.8843.4	PC-3p-14255_149	CACNB2:ENST00000324631
lncRNA	AL353997:ENST00000579352	PC-3p-14255_149	CACNB2:ENST00000324631
lncRNA	AL357033:ENST00000370520	PC-3p-14255_149	CACNB2:ENST00000324631
lncRNA	AL359220:ENST00000500036	PC-3p-14255_149	CACNB2:ENST00000324631
lncRNA	ALG1L6P:MSTRG.23013.2	PC-3p-14255_149	CACNB2:ENST00000324631
lncRNA	ARID5B:MSTRG.3874.1	PC-3p-14255_149	CACNB2:ENST00000324631
lncRNA	BRD3OS:MSTRG.33432.3	PC-3p-14255_149	CACNB2:ENST00000324631
lncRNA	CREB1:MSTRG.19830.16	PC-3p-14255_149	CACNB2:ENST00000324631
lncRNA	CYP4F26P:MSTRG.32430.3	PC-3p-14255_149	CACNB2:ENST00000324631
lncRNA	FENDRR:ENST00000598996	PC-3p-14255_149	CACNB2:ENST00000324631
lncRNA	FENDRR:ENST00000599749	PC-3p-14255_149	CACNB2:ENST00000324631
lncRNA	FENDRR:MSTRG.13193.9	PC-3p-14255_149	CACNB2:ENST00000324631
lncRNA	FENDRR:MSTRG.13194.1	PC-3p-14255_149	CACNB2:ENST00000324631
lncRNA	FOXQ1:MSTRG.27375.1	PC-3p-14255_149	CACNB2:ENST00000324631
lncRNA	HCP5:ENST00000541196	PC-3p-14255_149	CACNB2:ENST00000324631
lncRNA	HMGA2-AS1:ENST00000356215	PC-3p-14255_149	CACNB2:ENST00000324631
lncRNA	LEMD1:MSTRG.2799.1	PC-3p-14255_149	CACNB2:ENST00000324631
lncRNA	LEMD1:MSTRG.2802.1	PC-3p-14255_149	CACNB2:ENST00000324631
lncRNA	LINC00662:ENST00000586954	PC-3p-14255_149	CACNB2:ENST00000324631
lncRNA	LINC01291:ENST00000377469	PC-3p-14255_149	CACNB2:ENST00000324631
lncRNA	LINC02615:MSTRG.25231.1	PC-3p-14255_149	CACNB2:ENST00000324631
lncRNA	MALAT1:MSTRG.5556.14	PC-3p-14255_149	CACNB2:ENST00000324631
lncRNA	NFIA:MSTRG.1182.2	PC-3p-14255_149	CACNB2:ENST00000324631
lncRNA	PECAM1:MSTRG.14975.10	PC-3p-14255_149	CACNB2:ENST00000324631
lncRNA	RANBP3L:MSTRG.25925.5	PC-3p-14255_149	CACNB2:ENST00000324631
lncRNA	SGO1-AS1:MSTRG.22450.9	PC-3p-14255_149	CACNB2:ENST00000324631
lncRNA	SLC22A3:MSTRG.29166.3	PC-3p-14255_149	CACNB2:ENST00000324631
lncRNA	STARD4:MSTRG.26591.1	PC-3p-14255_149	CACNB2:ENST00000324631
lncRNA	TFAP2A-AS1:MSTRG.27487.2	PC-3p-14255_149	CACNB2:ENST00000324631
lncRNA	VRK2:MSTRG.18363.2	PC-3p-14255_149	CACNB2:ENST00000324631
lncRNA	WARS2-AS1:MSTRG.1790.9	PC-3p-14255_149	CACNB2:ENST00000324631
circRNA	ciRNA685	PC-3p-14255_149	CACNB2:ENST00000324631
circRNA	circRNA2527	PC-3p-14255_149	CACNB2:ENST00000324631
circRNA	circRNA2560	PC-3p-14255_149	CACNB2:ENST00000324631
circRNA	circRNA4749	PC-3p-14255_149	CACNB2:ENST00000324631
circRNA	circRNA4750	PC-3p-14255_149	CACNB2:ENST00000324631
circRNA	circRNA9874	PC-3p-14255_149	CACNB2:ENST00000324631
circRNA	hsa_circ_0000606	PC-3p-14255_149	CACNB2:ENST00000324631
circRNA	hsa_circ_0005332	PC-3p-14255_149	CACNB2:ENST00000324631
circRNA	hsa_circ_0008250	PC-3p-14255_149	CACNB2:ENST00000324631
circRNA	hsa_circ_0089274	PC-3p-14255_149	CACNB2:ENST00000324631
lncRNA	.:MSTRG.23753.1	PC-3p-14255_149	CALM1:ENST00000356978
lncRNA	.:MSTRG.23760.1	PC-3p-14255_149	CALM1:ENST00000356978
lncRNA	.:MSTRG.23776.1	PC-3p-14255_149	CALM1:ENST00000356978
lncRNA	.:MSTRG.25236.1	PC-3p-14255_149	CALM1:ENST00000356978
lncRNA	.:MSTRG.25242.1	PC-3p-14255_149	CALM1:ENST00000356978
lncRNA	AC008957:MSTRG.25927.2	PC-3p-14255_149	CALM1:ENST00000356978
lncRNA	AC015712:ENST00000560068	PC-3p-14255_149	CALM1:ENST00000356978
lncRNA	AC020978:ENST00000571197	PC-3p-14255_149	CALM1:ENST00000356978
lncRNA	AC097478:MSTRG.24911.12	PC-3p-14255_149	CALM1:ENST00000356978
lncRNA	AL160254:MSTRG.8843.4	PC-3p-14255_149	CALM1:ENST00000356978
lncRNA	AL353997:ENST00000579352	PC-3p-14255_149	CALM1:ENST00000356978
lncRNA	AL357033:ENST00000370520	PC-3p-14255_149	CALM1:ENST00000356978
lncRNA	AL359220:ENST00000500036	PC-3p-14255_149	CALM1:ENST00000356978
lncRNA	ALG1L6P:MSTRG.23013.2	PC-3p-14255_149	CALM1:ENST00000356978
lncRNA	ARID5B:MSTRG.3874.1	PC-3p-14255_149	CALM1:ENST00000356978
lncRNA	BRD3OS:MSTRG.33432.3	PC-3p-14255_149	CALM1:ENST00000356978
lncRNA	CREB1:MSTRG.19830.16	PC-3p-14255_149	CALM1:ENST00000356978
lncRNA	CYP4F26P:MSTRG.32430.3	PC-3p-14255_149	CALM1:ENST00000356978
lncRNA	FENDRR:ENST00000598996	PC-3p-14255_149	CALM1:ENST00000356978
lncRNA	FENDRR:ENST00000599749	PC-3p-14255_149	CALM1:ENST00000356978
lncRNA	FENDRR:MSTRG.13193.9	PC-3p-14255_149	CALM1:ENST00000356978
lncRNA	FENDRR:MSTRG.13194.1	PC-3p-14255_149	CALM1:ENST00000356978
lncRNA	FOXQ1:MSTRG.27375.1	PC-3p-14255_149	CALM1:ENST00000356978
lncRNA	HCP5:ENST00000541196	PC-3p-14255_149	CALM1:ENST00000356978
lncRNA	HMGA2-AS1:ENST00000356215	PC-3p-14255_149	CALM1:ENST00000356978
lncRNA	LEMD1:MSTRG.2799.1	PC-3p-14255_149	CALM1:ENST00000356978
lncRNA	LEMD1:MSTRG.2802.1	PC-3p-14255_149	CALM1:ENST00000356978
lncRNA	LINC00662:ENST00000586954	PC-3p-14255_149	CALM1:ENST00000356978
lncRNA	LINC01291:ENST00000377469	PC-3p-14255_149	CALM1:ENST00000356978
lncRNA	LINC02615:MSTRG.25231.1	PC-3p-14255_149	CALM1:ENST00000356978
lncRNA	MALAT1:MSTRG.5556.14	PC-3p-14255_149	CALM1:ENST00000356978
lncRNA	NFIA:MSTRG.1182.2	PC-3p-14255_149	CALM1:ENST00000356978
lncRNA	PECAM1:MSTRG.14975.10	PC-3p-14255_149	CALM1:ENST00000356978
lncRNA	RANBP3L:MSTRG.25925.5	PC-3p-14255_149	CALM1:ENST00000356978
lncRNA	SGO1-AS1:MSTRG.22450.9	PC-3p-14255_149	CALM1:ENST00000356978
lncRNA	SLC22A3:MSTRG.29166.3	PC-3p-14255_149	CALM1:ENST00000356978
lncRNA	STARD4:MSTRG.26591.1	PC-3p-14255_149	CALM1:ENST00000356978
lncRNA	TFAP2A-AS1:MSTRG.27487.2	PC-3p-14255_149	CALM1:ENST00000356978
lncRNA	VRK2:MSTRG.18363.2	PC-3p-14255_149	CALM1:ENST00000356978
lncRNA	WARS2-AS1:MSTRG.1790.9	PC-3p-14255_149	CALM1:ENST00000356978
circRNA	ciRNA685	PC-3p-14255_149	CALM1:ENST00000356978
circRNA	circRNA2527	PC-3p-14255_149	CALM1:ENST00000356978
circRNA	circRNA2560	PC-3p-14255_149	CALM1:ENST00000356978
circRNA	circRNA4749	PC-3p-14255_149	CALM1:ENST00000356978
circRNA	circRNA4750	PC-3p-14255_149	CALM1:ENST00000356978
circRNA	circRNA9874	PC-3p-14255_149	CALM1:ENST00000356978
circRNA	hsa_circ_0000606	PC-3p-14255_149	CALM1:ENST00000356978
circRNA	hsa_circ_0005332	PC-3p-14255_149	CALM1:ENST00000356978
circRNA	hsa_circ_0008250	PC-3p-14255_149	CALM1:ENST00000356978
circRNA	hsa_circ_0089274	PC-3p-14255_149	CALM1:ENST00000356978
lncRNA	.:MSTRG.23753.1	PC-3p-14255_149	CALU:ENST00000542996
lncRNA	.:MSTRG.23760.1	PC-3p-14255_149	CALU:ENST00000542996
lncRNA	.:MSTRG.23776.1	PC-3p-14255_149	CALU:ENST00000542996
lncRNA	.:MSTRG.25236.1	PC-3p-14255_149	CALU:ENST00000542996
lncRNA	.:MSTRG.25242.1	PC-3p-14255_149	CALU:ENST00000542996
lncRNA	AC008957:MSTRG.25927.2	PC-3p-14255_149	CALU:ENST00000542996
lncRNA	AC015712:ENST00000560068	PC-3p-14255_149	CALU:ENST00000542996
lncRNA	AC020978:ENST00000571197	PC-3p-14255_149	CALU:ENST00000542996
lncRNA	AC097478:MSTRG.24911.12	PC-3p-14255_149	CALU:ENST00000542996
lncRNA	AL160254:MSTRG.8843.4	PC-3p-14255_149	CALU:ENST00000542996
lncRNA	AL353997:ENST00000579352	PC-3p-14255_149	CALU:ENST00000542996
lncRNA	AL357033:ENST00000370520	PC-3p-14255_149	CALU:ENST00000542996
lncRNA	AL359220:ENST00000500036	PC-3p-14255_149	CALU:ENST00000542996
lncRNA	ALG1L6P:MSTRG.23013.2	PC-3p-14255_149	CALU:ENST00000542996
lncRNA	ARID5B:MSTRG.3874.1	PC-3p-14255_149	CALU:ENST00000542996
lncRNA	BRD3OS:MSTRG.33432.3	PC-3p-14255_149	CALU:ENST00000542996
lncRNA	CREB1:MSTRG.19830.16	PC-3p-14255_149	CALU:ENST00000542996
lncRNA	CYP4F26P:MSTRG.32430.3	PC-3p-14255_149	CALU:ENST00000542996
lncRNA	FENDRR:ENST00000598996	PC-3p-14255_149	CALU:ENST00000542996
lncRNA	FENDRR:ENST00000599749	PC-3p-14255_149	CALU:ENST00000542996
lncRNA	FENDRR:MSTRG.13193.9	PC-3p-14255_149	CALU:ENST00000542996
lncRNA	FENDRR:MSTRG.13194.1	PC-3p-14255_149	CALU:ENST00000542996
lncRNA	FOXQ1:MSTRG.27375.1	PC-3p-14255_149	CALU:ENST00000542996
lncRNA	HCP5:ENST00000541196	PC-3p-14255_149	CALU:ENST00000542996
lncRNA	HMGA2-AS1:ENST00000356215	PC-3p-14255_149	CALU:ENST00000542996
lncRNA	LEMD1:MSTRG.2799.1	PC-3p-14255_149	CALU:ENST00000542996
lncRNA	LEMD1:MSTRG.2802.1	PC-3p-14255_149	CALU:ENST00000542996
lncRNA	LINC00662:ENST00000586954	PC-3p-14255_149	CALU:ENST00000542996
lncRNA	LINC01291:ENST00000377469	PC-3p-14255_149	CALU:ENST00000542996
lncRNA	LINC02615:MSTRG.25231.1	PC-3p-14255_149	CALU:ENST00000542996
lncRNA	MALAT1:MSTRG.5556.14	PC-3p-14255_149	CALU:ENST00000542996
lncRNA	NFIA:MSTRG.1182.2	PC-3p-14255_149	CALU:ENST00000542996
lncRNA	PECAM1:MSTRG.14975.10	PC-3p-14255_149	CALU:ENST00000542996
lncRNA	RANBP3L:MSTRG.25925.5	PC-3p-14255_149	CALU:ENST00000542996
lncRNA	SGO1-AS1:MSTRG.22450.9	PC-3p-14255_149	CALU:ENST00000542996
lncRNA	SLC22A3:MSTRG.29166.3	PC-3p-14255_149	CALU:ENST00000542996
lncRNA	STARD4:MSTRG.26591.1	PC-3p-14255_149	CALU:ENST00000542996
lncRNA	TFAP2A-AS1:MSTRG.27487.2	PC-3p-14255_149	CALU:ENST00000542996
lncRNA	VRK2:MSTRG.18363.2	PC-3p-14255_149	CALU:ENST00000542996
lncRNA	WARS2-AS1:MSTRG.1790.9	PC-3p-14255_149	CALU:ENST00000542996
circRNA	ciRNA685	PC-3p-14255_149	CALU:ENST00000542996
circRNA	circRNA2527	PC-3p-14255_149	CALU:ENST00000542996
circRNA	circRNA2560	PC-3p-14255_149	CALU:ENST00000542996
circRNA	circRNA4749	PC-3p-14255_149	CALU:ENST00000542996
circRNA	circRNA4750	PC-3p-14255_149	CALU:ENST00000542996
circRNA	circRNA9874	PC-3p-14255_149	CALU:ENST00000542996
circRNA	hsa_circ_0000606	PC-3p-14255_149	CALU:ENST00000542996
circRNA	hsa_circ_0005332	PC-3p-14255_149	CALU:ENST00000542996
circRNA	hsa_circ_0008250	PC-3p-14255_149	CALU:ENST00000542996
circRNA	hsa_circ_0089274	PC-3p-14255_149	CALU:ENST00000542996
lncRNA	.:MSTRG.23753.1	PC-3p-14255_149	CAST:ENST00000437034
lncRNA	.:MSTRG.23760.1	PC-3p-14255_149	CAST:ENST00000437034
lncRNA	.:MSTRG.23776.1	PC-3p-14255_149	CAST:ENST00000437034
lncRNA	.:MSTRG.25236.1	PC-3p-14255_149	CAST:ENST00000437034
lncRNA	.:MSTRG.25242.1	PC-3p-14255_149	CAST:ENST00000437034
lncRNA	AC008957:MSTRG.25927.2	PC-3p-14255_149	CAST:ENST00000437034
lncRNA	AC015712:ENST00000560068	PC-3p-14255_149	CAST:ENST00000437034
lncRNA	AC020978:ENST00000571197	PC-3p-14255_149	CAST:ENST00000437034
lncRNA	AC097478:MSTRG.24911.12	PC-3p-14255_149	CAST:ENST00000437034
lncRNA	AL160254:MSTRG.8843.4	PC-3p-14255_149	CAST:ENST00000437034
lncRNA	AL353997:ENST00000579352	PC-3p-14255_149	CAST:ENST00000437034
lncRNA	AL357033:ENST00000370520	PC-3p-14255_149	CAST:ENST00000437034
lncRNA	AL359220:ENST00000500036	PC-3p-14255_149	CAST:ENST00000437034
lncRNA	ALG1L6P:MSTRG.23013.2	PC-3p-14255_149	CAST:ENST00000437034
lncRNA	ARID5B:MSTRG.3874.1	PC-3p-14255_149	CAST:ENST00000437034
lncRNA	BRD3OS:MSTRG.33432.3	PC-3p-14255_149	CAST:ENST00000437034
lncRNA	CREB1:MSTRG.19830.16	PC-3p-14255_149	CAST:ENST00000437034
lncRNA	CYP4F26P:MSTRG.32430.3	PC-3p-14255_149	CAST:ENST00000437034
lncRNA	FENDRR:ENST00000598996	PC-3p-14255_149	CAST:ENST00000437034
lncRNA	FENDRR:ENST00000599749	PC-3p-14255_149	CAST:ENST00000437034
lncRNA	FENDRR:MSTRG.13193.9	PC-3p-14255_149	CAST:ENST00000437034
lncRNA	FENDRR:MSTRG.13194.1	PC-3p-14255_149	CAST:ENST00000437034
lncRNA	FOXQ1:MSTRG.27375.1	PC-3p-14255_149	CAST:ENST00000437034
lncRNA	HCP5:ENST00000541196	PC-3p-14255_149	CAST:ENST00000437034
lncRNA	HMGA2-AS1:ENST00000356215	PC-3p-14255_149	CAST:ENST00000437034
lncRNA	LEMD1:MSTRG.2799.1	PC-3p-14255_149	CAST:ENST00000437034
lncRNA	LEMD1:MSTRG.2802.1	PC-3p-14255_149	CAST:ENST00000437034
lncRNA	LINC00662:ENST00000586954	PC-3p-14255_149	CAST:ENST00000437034
lncRNA	LINC01291:ENST00000377469	PC-3p-14255_149	CAST:ENST00000437034
lncRNA	LINC02615:MSTRG.25231.1	PC-3p-14255_149	CAST:ENST00000437034
lncRNA	MALAT1:MSTRG.5556.14	PC-3p-14255_149	CAST:ENST00000437034
lncRNA	NFIA:MSTRG.1182.2	PC-3p-14255_149	CAST:ENST00000437034
lncRNA	PECAM1:MSTRG.14975.10	PC-3p-14255_149	CAST:ENST00000437034
lncRNA	RANBP3L:MSTRG.25925.5	PC-3p-14255_149	CAST:ENST00000437034
lncRNA	SGO1-AS1:MSTRG.22450.9	PC-3p-14255_149	CAST:ENST00000437034
lncRNA	SLC22A3:MSTRG.29166.3	PC-3p-14255_149	CAST:ENST00000437034
lncRNA	STARD4:MSTRG.26591.1	PC-3p-14255_149	CAST:ENST00000437034
lncRNA	TFAP2A-AS1:MSTRG.27487.2	PC-3p-14255_149	CAST:ENST00000437034
lncRNA	VRK2:MSTRG.18363.2	PC-3p-14255_149	CAST:ENST00000437034
lncRNA	WARS2-AS1:MSTRG.1790.9	PC-3p-14255_149	CAST:ENST00000437034
circRNA	ciRNA685	PC-3p-14255_149	CAST:ENST00000437034
circRNA	circRNA2527	PC-3p-14255_149	CAST:ENST00000437034
circRNA	circRNA2560	PC-3p-14255_149	CAST:ENST00000437034
circRNA	circRNA4749	PC-3p-14255_149	CAST:ENST00000437034
circRNA	circRNA4750	PC-3p-14255_149	CAST:ENST00000437034
circRNA	circRNA9874	PC-3p-14255_149	CAST:ENST00000437034
circRNA	hsa_circ_0000606	PC-3p-14255_149	CAST:ENST00000437034
circRNA	hsa_circ_0005332	PC-3p-14255_149	CAST:ENST00000437034
circRNA	hsa_circ_0008250	PC-3p-14255_149	CAST:ENST00000437034
circRNA	hsa_circ_0089274	PC-3p-14255_149	CAST:ENST00000437034
lncRNA	.:MSTRG.23753.1	PC-3p-14255_149	CBFB:ENST00000290858
lncRNA	.:MSTRG.23760.1	PC-3p-14255_149	CBFB:ENST00000290858
lncRNA	.:MSTRG.23776.1	PC-3p-14255_149	CBFB:ENST00000290858
lncRNA	.:MSTRG.25236.1	PC-3p-14255_149	CBFB:ENST00000290858
lncRNA	.:MSTRG.25242.1	PC-3p-14255_149	CBFB:ENST00000290858
lncRNA	AC008957:MSTRG.25927.2	PC-3p-14255_149	CBFB:ENST00000290858
lncRNA	AC015712:ENST00000560068	PC-3p-14255_149	CBFB:ENST00000290858
lncRNA	AC020978:ENST00000571197	PC-3p-14255_149	CBFB:ENST00000290858
lncRNA	AC097478:MSTRG.24911.12	PC-3p-14255_149	CBFB:ENST00000290858
lncRNA	AL160254:MSTRG.8843.4	PC-3p-14255_149	CBFB:ENST00000290858
lncRNA	AL353997:ENST00000579352	PC-3p-14255_149	CBFB:ENST00000290858
lncRNA	AL357033:ENST00000370520	PC-3p-14255_149	CBFB:ENST00000290858
lncRNA	AL359220:ENST00000500036	PC-3p-14255_149	CBFB:ENST00000290858
lncRNA	ALG1L6P:MSTRG.23013.2	PC-3p-14255_149	CBFB:ENST00000290858
lncRNA	ARID5B:MSTRG.3874.1	PC-3p-14255_149	CBFB:ENST00000290858
lncRNA	BRD3OS:MSTRG.33432.3	PC-3p-14255_149	CBFB:ENST00000290858
lncRNA	CREB1:MSTRG.19830.16	PC-3p-14255_149	CBFB:ENST00000290858
lncRNA	CYP4F26P:MSTRG.32430.3	PC-3p-14255_149	CBFB:ENST00000290858
lncRNA	FENDRR:ENST00000598996	PC-3p-14255_149	CBFB:ENST00000290858
lncRNA	FENDRR:ENST00000599749	PC-3p-14255_149	CBFB:ENST00000290858
lncRNA	FENDRR:MSTRG.13193.9	PC-3p-14255_149	CBFB:ENST00000290858
lncRNA	FENDRR:MSTRG.13194.1	PC-3p-14255_149	CBFB:ENST00000290858
lncRNA	FOXQ1:MSTRG.27375.1	PC-3p-14255_149	CBFB:ENST00000290858
lncRNA	HCP5:ENST00000541196	PC-3p-14255_149	CBFB:ENST00000290858
lncRNA	HMGA2-AS1:ENST00000356215	PC-3p-14255_149	CBFB:ENST00000290858
lncRNA	LEMD1:MSTRG.2799.1	PC-3p-14255_149	CBFB:ENST00000290858
lncRNA	LEMD1:MSTRG.2802.1	PC-3p-14255_149	CBFB:ENST00000290858
lncRNA	LINC00662:ENST00000586954	PC-3p-14255_149	CBFB:ENST00000290858
lncRNA	LINC01291:ENST00000377469	PC-3p-14255_149	CBFB:ENST00000290858
lncRNA	LINC02615:MSTRG.25231.1	PC-3p-14255_149	CBFB:ENST00000290858
lncRNA	MALAT1:MSTRG.5556.14	PC-3p-14255_149	CBFB:ENST00000290858
lncRNA	NFIA:MSTRG.1182.2	PC-3p-14255_149	CBFB:ENST00000290858
lncRNA	PECAM1:MSTRG.14975.10	PC-3p-14255_149	CBFB:ENST00000290858
lncRNA	RANBP3L:MSTRG.25925.5	PC-3p-14255_149	CBFB:ENST00000290858
lncRNA	SGO1-AS1:MSTRG.22450.9	PC-3p-14255_149	CBFB:ENST00000290858
lncRNA	SLC22A3:MSTRG.29166.3	PC-3p-14255_149	CBFB:ENST00000290858
lncRNA	STARD4:MSTRG.26591.1	PC-3p-14255_149	CBFB:ENST00000290858
lncRNA	TFAP2A-AS1:MSTRG.27487.2	PC-3p-14255_149	CBFB:ENST00000290858
lncRNA	VRK2:MSTRG.18363.2	PC-3p-14255_149	CBFB:ENST00000290858
lncRNA	WARS2-AS1:MSTRG.1790.9	PC-3p-14255_149	CBFB:ENST00000290858
circRNA	ciRNA685	PC-3p-14255_149	CBFB:ENST00000290858
circRNA	circRNA2527	PC-3p-14255_149	CBFB:ENST00000290858
circRNA	circRNA2560	PC-3p-14255_149	CBFB:ENST00000290858
circRNA	circRNA4749	PC-3p-14255_149	CBFB:ENST00000290858
circRNA	circRNA4750	PC-3p-14255_149	CBFB:ENST00000290858
circRNA	circRNA9874	PC-3p-14255_149	CBFB:ENST00000290858
circRNA	hsa_circ_0000606	PC-3p-14255_149	CBFB:ENST00000290858
circRNA	hsa_circ_0005332	PC-3p-14255_149	CBFB:ENST00000290858
circRNA	hsa_circ_0008250	PC-3p-14255_149	CBFB:ENST00000290858
circRNA	hsa_circ_0089274	PC-3p-14255_149	CBFB:ENST00000290858
lncRNA	.:MSTRG.23753.1	PC-3p-14255_149	CDC6:ENST00000649662
lncRNA	.:MSTRG.23760.1	PC-3p-14255_149	CDC6:ENST00000649662
lncRNA	.:MSTRG.23776.1	PC-3p-14255_149	CDC6:ENST00000649662
lncRNA	.:MSTRG.25236.1	PC-3p-14255_149	CDC6:ENST00000649662
lncRNA	.:MSTRG.25242.1	PC-3p-14255_149	CDC6:ENST00000649662
lncRNA	AC008957:MSTRG.25927.2	PC-3p-14255_149	CDC6:ENST00000649662
lncRNA	AC015712:ENST00000560068	PC-3p-14255_149	CDC6:ENST00000649662
lncRNA	AC020978:ENST00000571197	PC-3p-14255_149	CDC6:ENST00000649662
lncRNA	AC097478:MSTRG.24911.12	PC-3p-14255_149	CDC6:ENST00000649662
lncRNA	AL160254:MSTRG.8843.4	PC-3p-14255_149	CDC6:ENST00000649662
lncRNA	AL353997:ENST00000579352	PC-3p-14255_149	CDC6:ENST00000649662
lncRNA	AL357033:ENST00000370520	PC-3p-14255_149	CDC6:ENST00000649662
lncRNA	AL359220:ENST00000500036	PC-3p-14255_149	CDC6:ENST00000649662
lncRNA	ALG1L6P:MSTRG.23013.2	PC-3p-14255_149	CDC6:ENST00000649662
lncRNA	ARID5B:MSTRG.3874.1	PC-3p-14255_149	CDC6:ENST00000649662
lncRNA	BRD3OS:MSTRG.33432.3	PC-3p-14255_149	CDC6:ENST00000649662
lncRNA	CREB1:MSTRG.19830.16	PC-3p-14255_149	CDC6:ENST00000649662
lncRNA	CYP4F26P:MSTRG.32430.3	PC-3p-14255_149	CDC6:ENST00000649662
lncRNA	FENDRR:ENST00000598996	PC-3p-14255_149	CDC6:ENST00000649662
lncRNA	FENDRR:ENST00000599749	PC-3p-14255_149	CDC6:ENST00000649662
lncRNA	FENDRR:MSTRG.13193.9	PC-3p-14255_149	CDC6:ENST00000649662
lncRNA	FENDRR:MSTRG.13194.1	PC-3p-14255_149	CDC6:ENST00000649662
lncRNA	FOXQ1:MSTRG.27375.1	PC-3p-14255_149	CDC6:ENST00000649662
lncRNA	HCP5:ENST00000541196	PC-3p-14255_149	CDC6:ENST00000649662
lncRNA	HMGA2-AS1:ENST00000356215	PC-3p-14255_149	CDC6:ENST00000649662
lncRNA	LEMD1:MSTRG.2799.1	PC-3p-14255_149	CDC6:ENST00000649662
lncRNA	LEMD1:MSTRG.2802.1	PC-3p-14255_149	CDC6:ENST00000649662
lncRNA	LINC00662:ENST00000586954	PC-3p-14255_149	CDC6:ENST00000649662
lncRNA	LINC01291:ENST00000377469	PC-3p-14255_149	CDC6:ENST00000649662
lncRNA	LINC02615:MSTRG.25231.1	PC-3p-14255_149	CDC6:ENST00000649662
lncRNA	MALAT1:MSTRG.5556.14	PC-3p-14255_149	CDC6:ENST00000649662
lncRNA	NFIA:MSTRG.1182.2	PC-3p-14255_149	CDC6:ENST00000649662
lncRNA	PECAM1:MSTRG.14975.10	PC-3p-14255_149	CDC6:ENST00000649662
lncRNA	RANBP3L:MSTRG.25925.5	PC-3p-14255_149	CDC6:ENST00000649662
lncRNA	SGO1-AS1:MSTRG.22450.9	PC-3p-14255_149	CDC6:ENST00000649662
lncRNA	SLC22A3:MSTRG.29166.3	PC-3p-14255_149	CDC6:ENST00000649662
lncRNA	STARD4:MSTRG.26591.1	PC-3p-14255_149	CDC6:ENST00000649662
lncRNA	TFAP2A-AS1:MSTRG.27487.2	PC-3p-14255_149	CDC6:ENST00000649662
lncRNA	VRK2:MSTRG.18363.2	PC-3p-14255_149	CDC6:ENST00000649662
lncRNA	WARS2-AS1:MSTRG.1790.9	PC-3p-14255_149	CDC6:ENST00000649662
circRNA	ciRNA685	PC-3p-14255_149	CDC6:ENST00000649662
circRNA	circRNA2527	PC-3p-14255_149	CDC6:ENST00000649662
circRNA	circRNA2560	PC-3p-14255_149	CDC6:ENST00000649662
circRNA	circRNA4749	PC-3p-14255_149	CDC6:ENST00000649662
circRNA	circRNA4750	PC-3p-14255_149	CDC6:ENST00000649662
circRNA	circRNA9874	PC-3p-14255_149	CDC6:ENST00000649662
circRNA	hsa_circ_0000606	PC-3p-14255_149	CDC6:ENST00000649662
circRNA	hsa_circ_0005332	PC-3p-14255_149	CDC6:ENST00000649662
circRNA	hsa_circ_0008250	PC-3p-14255_149	CDC6:ENST00000649662
circRNA	hsa_circ_0089274	PC-3p-14255_149	CDC6:ENST00000649662
lncRNA	.:MSTRG.23753.1	PC-3p-14255_149	CDH2:ENST00000269141
lncRNA	.:MSTRG.23760.1	PC-3p-14255_149	CDH2:ENST00000269141
lncRNA	.:MSTRG.23776.1	PC-3p-14255_149	CDH2:ENST00000269141
lncRNA	.:MSTRG.25236.1	PC-3p-14255_149	CDH2:ENST00000269141
lncRNA	.:MSTRG.25242.1	PC-3p-14255_149	CDH2:ENST00000269141
lncRNA	AC008957:MSTRG.25927.2	PC-3p-14255_149	CDH2:ENST00000269141
lncRNA	AC015712:ENST00000560068	PC-3p-14255_149	CDH2:ENST00000269141
lncRNA	AC020978:ENST00000571197	PC-3p-14255_149	CDH2:ENST00000269141
lncRNA	AC097478:MSTRG.24911.12	PC-3p-14255_149	CDH2:ENST00000269141
lncRNA	AL160254:MSTRG.8843.4	PC-3p-14255_149	CDH2:ENST00000269141
lncRNA	AL353997:ENST00000579352	PC-3p-14255_149	CDH2:ENST00000269141
lncRNA	AL357033:ENST00000370520	PC-3p-14255_149	CDH2:ENST00000269141
lncRNA	AL359220:ENST00000500036	PC-3p-14255_149	CDH2:ENST00000269141
lncRNA	ALG1L6P:MSTRG.23013.2	PC-3p-14255_149	CDH2:ENST00000269141
lncRNA	ARID5B:MSTRG.3874.1	PC-3p-14255_149	CDH2:ENST00000269141
lncRNA	BRD3OS:MSTRG.33432.3	PC-3p-14255_149	CDH2:ENST00000269141
lncRNA	CREB1:MSTRG.19830.16	PC-3p-14255_149	CDH2:ENST00000269141
lncRNA	CYP4F26P:MSTRG.32430.3	PC-3p-14255_149	CDH2:ENST00000269141
lncRNA	FENDRR:ENST00000598996	PC-3p-14255_149	CDH2:ENST00000269141
lncRNA	FENDRR:ENST00000599749	PC-3p-14255_149	CDH2:ENST00000269141
lncRNA	FENDRR:MSTRG.13193.9	PC-3p-14255_149	CDH2:ENST00000269141
lncRNA	FENDRR:MSTRG.13194.1	PC-3p-14255_149	CDH2:ENST00000269141
lncRNA	FOXQ1:MSTRG.27375.1	PC-3p-14255_149	CDH2:ENST00000269141
lncRNA	HCP5:ENST00000541196	PC-3p-14255_149	CDH2:ENST00000269141
lncRNA	HMGA2-AS1:ENST00000356215	PC-3p-14255_149	CDH2:ENST00000269141
lncRNA	LEMD1:MSTRG.2799.1	PC-3p-14255_149	CDH2:ENST00000269141
lncRNA	LEMD1:MSTRG.2802.1	PC-3p-14255_149	CDH2:ENST00000269141
lncRNA	LINC00662:ENST00000586954	PC-3p-14255_149	CDH2:ENST00000269141
lncRNA	LINC01291:ENST00000377469	PC-3p-14255_149	CDH2:ENST00000269141
lncRNA	LINC02615:MSTRG.25231.1	PC-3p-14255_149	CDH2:ENST00000269141
lncRNA	MALAT1:MSTRG.5556.14	PC-3p-14255_149	CDH2:ENST00000269141
lncRNA	NFIA:MSTRG.1182.2	PC-3p-14255_149	CDH2:ENST00000269141
lncRNA	PECAM1:MSTRG.14975.10	PC-3p-14255_149	CDH2:ENST00000269141
lncRNA	RANBP3L:MSTRG.25925.5	PC-3p-14255_149	CDH2:ENST00000269141
lncRNA	SGO1-AS1:MSTRG.22450.9	PC-3p-14255_149	CDH2:ENST00000269141
lncRNA	SLC22A3:MSTRG.29166.3	PC-3p-14255_149	CDH2:ENST00000269141
lncRNA	STARD4:MSTRG.26591.1	PC-3p-14255_149	CDH2:ENST00000269141
lncRNA	TFAP2A-AS1:MSTRG.27487.2	PC-3p-14255_149	CDH2:ENST00000269141
lncRNA	VRK2:MSTRG.18363.2	PC-3p-14255_149	CDH2:ENST00000269141
lncRNA	WARS2-AS1:MSTRG.1790.9	PC-3p-14255_149	CDH2:ENST00000269141
circRNA	ciRNA685	PC-3p-14255_149	CDH2:ENST00000269141
circRNA	circRNA2527	PC-3p-14255_149	CDH2:ENST00000269141
circRNA	circRNA2560	PC-3p-14255_149	CDH2:ENST00000269141
circRNA	circRNA4749	PC-3p-14255_149	CDH2:ENST00000269141
circRNA	circRNA4750	PC-3p-14255_149	CDH2:ENST00000269141
circRNA	circRNA9874	PC-3p-14255_149	CDH2:ENST00000269141
circRNA	hsa_circ_0000606	PC-3p-14255_149	CDH2:ENST00000269141
circRNA	hsa_circ_0005332	PC-3p-14255_149	CDH2:ENST00000269141
circRNA	hsa_circ_0008250	PC-3p-14255_149	CDH2:ENST00000269141
circRNA	hsa_circ_0089274	PC-3p-14255_149	CDH2:ENST00000269141
lncRNA	.:MSTRG.23753.1	PC-3p-14255_149	CDH4:ENST00000614565
lncRNA	.:MSTRG.23760.1	PC-3p-14255_149	CDH4:ENST00000614565
lncRNA	.:MSTRG.23776.1	PC-3p-14255_149	CDH4:ENST00000614565
lncRNA	.:MSTRG.25236.1	PC-3p-14255_149	CDH4:ENST00000614565
lncRNA	.:MSTRG.25242.1	PC-3p-14255_149	CDH4:ENST00000614565
lncRNA	AC008957:MSTRG.25927.2	PC-3p-14255_149	CDH4:ENST00000614565
lncRNA	AC015712:ENST00000560068	PC-3p-14255_149	CDH4:ENST00000614565
lncRNA	AC020978:ENST00000571197	PC-3p-14255_149	CDH4:ENST00000614565
lncRNA	AC097478:MSTRG.24911.12	PC-3p-14255_149	CDH4:ENST00000614565
lncRNA	AL160254:MSTRG.8843.4	PC-3p-14255_149	CDH4:ENST00000614565
lncRNA	AL353997:ENST00000579352	PC-3p-14255_149	CDH4:ENST00000614565
lncRNA	AL357033:ENST00000370520	PC-3p-14255_149	CDH4:ENST00000614565
lncRNA	AL359220:ENST00000500036	PC-3p-14255_149	CDH4:ENST00000614565
lncRNA	ALG1L6P:MSTRG.23013.2	PC-3p-14255_149	CDH4:ENST00000614565
lncRNA	ARID5B:MSTRG.3874.1	PC-3p-14255_149	CDH4:ENST00000614565
lncRNA	BRD3OS:MSTRG.33432.3	PC-3p-14255_149	CDH4:ENST00000614565
lncRNA	CREB1:MSTRG.19830.16	PC-3p-14255_149	CDH4:ENST00000614565
lncRNA	CYP4F26P:MSTRG.32430.3	PC-3p-14255_149	CDH4:ENST00000614565
lncRNA	FENDRR:ENST00000598996	PC-3p-14255_149	CDH4:ENST00000614565
lncRNA	FENDRR:ENST00000599749	PC-3p-14255_149	CDH4:ENST00000614565
lncRNA	FENDRR:MSTRG.13193.9	PC-3p-14255_149	CDH4:ENST00000614565
lncRNA	FENDRR:MSTRG.13194.1	PC-3p-14255_149	CDH4:ENST00000614565
lncRNA	FOXQ1:MSTRG.27375.1	PC-3p-14255_149	CDH4:ENST00000614565
lncRNA	HCP5:ENST00000541196	PC-3p-14255_149	CDH4:ENST00000614565
lncRNA	HMGA2-AS1:ENST00000356215	PC-3p-14255_149	CDH4:ENST00000614565
lncRNA	LEMD1:MSTRG.2799.1	PC-3p-14255_149	CDH4:ENST00000614565
lncRNA	LEMD1:MSTRG.2802.1	PC-3p-14255_149	CDH4:ENST00000614565
lncRNA	LINC00662:ENST00000586954	PC-3p-14255_149	CDH4:ENST00000614565
lncRNA	LINC01291:ENST00000377469	PC-3p-14255_149	CDH4:ENST00000614565
lncRNA	LINC02615:MSTRG.25231.1	PC-3p-14255_149	CDH4:ENST00000614565
lncRNA	MALAT1:MSTRG.5556.14	PC-3p-14255_149	CDH4:ENST00000614565
lncRNA	NFIA:MSTRG.1182.2	PC-3p-14255_149	CDH4:ENST00000614565
lncRNA	PECAM1:MSTRG.14975.10	PC-3p-14255_149	CDH4:ENST00000614565
lncRNA	RANBP3L:MSTRG.25925.5	PC-3p-14255_149	CDH4:ENST00000614565
lncRNA	SGO1-AS1:MSTRG.22450.9	PC-3p-14255_149	CDH4:ENST00000614565
lncRNA	SLC22A3:MSTRG.29166.3	PC-3p-14255_149	CDH4:ENST00000614565
lncRNA	STARD4:MSTRG.26591.1	PC-3p-14255_149	CDH4:ENST00000614565
lncRNA	TFAP2A-AS1:MSTRG.27487.2	PC-3p-14255_149	CDH4:ENST00000614565
lncRNA	VRK2:MSTRG.18363.2	PC-3p-14255_149	CDH4:ENST00000614565
lncRNA	WARS2-AS1:MSTRG.1790.9	PC-3p-14255_149	CDH4:ENST00000614565
circRNA	ciRNA685	PC-3p-14255_149	CDH4:ENST00000614565
circRNA	circRNA2527	PC-3p-14255_149	CDH4:ENST00000614565
circRNA	circRNA2560	PC-3p-14255_149	CDH4:ENST00000614565
circRNA	circRNA4749	PC-3p-14255_149	CDH4:ENST00000614565
circRNA	circRNA4750	PC-3p-14255_149	CDH4:ENST00000614565
circRNA	circRNA9874	PC-3p-14255_149	CDH4:ENST00000614565
circRNA	hsa_circ_0000606	PC-3p-14255_149	CDH4:ENST00000614565
circRNA	hsa_circ_0005332	PC-3p-14255_149	CDH4:ENST00000614565
circRNA	hsa_circ_0008250	PC-3p-14255_149	CDH4:ENST00000614565
circRNA	hsa_circ_0089274	PC-3p-14255_149	CDH4:ENST00000614565
lncRNA	.:MSTRG.23753.1	PC-3p-14255_149	CDK4:ENST00000312990
lncRNA	.:MSTRG.23760.1	PC-3p-14255_149	CDK4:ENST00000312990
lncRNA	.:MSTRG.23776.1	PC-3p-14255_149	CDK4:ENST00000312990
lncRNA	.:MSTRG.25236.1	PC-3p-14255_149	CDK4:ENST00000312990
lncRNA	.:MSTRG.25242.1	PC-3p-14255_149	CDK4:ENST00000312990
lncRNA	AC008957:MSTRG.25927.2	PC-3p-14255_149	CDK4:ENST00000312990
lncRNA	AC015712:ENST00000560068	PC-3p-14255_149	CDK4:ENST00000312990
lncRNA	AC020978:ENST00000571197	PC-3p-14255_149	CDK4:ENST00000312990
lncRNA	AC097478:MSTRG.24911.12	PC-3p-14255_149	CDK4:ENST00000312990
lncRNA	AL160254:MSTRG.8843.4	PC-3p-14255_149	CDK4:ENST00000312990
lncRNA	AL353997:ENST00000579352	PC-3p-14255_149	CDK4:ENST00000312990
lncRNA	AL357033:ENST00000370520	PC-3p-14255_149	CDK4:ENST00000312990
lncRNA	AL359220:ENST00000500036	PC-3p-14255_149	CDK4:ENST00000312990
lncRNA	ALG1L6P:MSTRG.23013.2	PC-3p-14255_149	CDK4:ENST00000312990
lncRNA	ARID5B:MSTRG.3874.1	PC-3p-14255_149	CDK4:ENST00000312990
lncRNA	BRD3OS:MSTRG.33432.3	PC-3p-14255_149	CDK4:ENST00000312990
lncRNA	CREB1:MSTRG.19830.16	PC-3p-14255_149	CDK4:ENST00000312990
lncRNA	CYP4F26P:MSTRG.32430.3	PC-3p-14255_149	CDK4:ENST00000312990
lncRNA	FENDRR:ENST00000598996	PC-3p-14255_149	CDK4:ENST00000312990
lncRNA	FENDRR:ENST00000599749	PC-3p-14255_149	CDK4:ENST00000312990
lncRNA	FENDRR:MSTRG.13193.9	PC-3p-14255_149	CDK4:ENST00000312990
lncRNA	FENDRR:MSTRG.13194.1	PC-3p-14255_149	CDK4:ENST00000312990
lncRNA	FOXQ1:MSTRG.27375.1	PC-3p-14255_149	CDK4:ENST00000312990
lncRNA	HCP5:ENST00000541196	PC-3p-14255_149	CDK4:ENST00000312990
lncRNA	HMGA2-AS1:ENST00000356215	PC-3p-14255_149	CDK4:ENST00000312990
lncRNA	LEMD1:MSTRG.2799.1	PC-3p-14255_149	CDK4:ENST00000312990
lncRNA	LEMD1:MSTRG.2802.1	PC-3p-14255_149	CDK4:ENST00000312990
lncRNA	LINC00662:ENST00000586954	PC-3p-14255_149	CDK4:ENST00000312990
lncRNA	LINC01291:ENST00000377469	PC-3p-14255_149	CDK4:ENST00000312990
lncRNA	LINC02615:MSTRG.25231.1	PC-3p-14255_149	CDK4:ENST00000312990
lncRNA	MALAT1:MSTRG.5556.14	PC-3p-14255_149	CDK4:ENST00000312990
lncRNA	NFIA:MSTRG.1182.2	PC-3p-14255_149	CDK4:ENST00000312990
lncRNA	PECAM1:MSTRG.14975.10	PC-3p-14255_149	CDK4:ENST00000312990
lncRNA	RANBP3L:MSTRG.25925.5	PC-3p-14255_149	CDK4:ENST00000312990
lncRNA	SGO1-AS1:MSTRG.22450.9	PC-3p-14255_149	CDK4:ENST00000312990
lncRNA	SLC22A3:MSTRG.29166.3	PC-3p-14255_149	CDK4:ENST00000312990
lncRNA	STARD4:MSTRG.26591.1	PC-3p-14255_149	CDK4:ENST00000312990
lncRNA	TFAP2A-AS1:MSTRG.27487.2	PC-3p-14255_149	CDK4:ENST00000312990
lncRNA	VRK2:MSTRG.18363.2	PC-3p-14255_149	CDK4:ENST00000312990
lncRNA	WARS2-AS1:MSTRG.1790.9	PC-3p-14255_149	CDK4:ENST00000312990
circRNA	ciRNA685	PC-3p-14255_149	CDK4:ENST00000312990
circRNA	circRNA2527	PC-3p-14255_149	CDK4:ENST00000312990
circRNA	circRNA2560	PC-3p-14255_149	CDK4:ENST00000312990
circRNA	circRNA4749	PC-3p-14255_149	CDK4:ENST00000312990
circRNA	circRNA4750	PC-3p-14255_149	CDK4:ENST00000312990
circRNA	circRNA9874	PC-3p-14255_149	CDK4:ENST00000312990
circRNA	hsa_circ_0000606	PC-3p-14255_149	CDK4:ENST00000312990
circRNA	hsa_circ_0005332	PC-3p-14255_149	CDK4:ENST00000312990
circRNA	hsa_circ_0008250	PC-3p-14255_149	CDK4:ENST00000312990
circRNA	hsa_circ_0089274	PC-3p-14255_149	CDK4:ENST00000312990
lncRNA	.:MSTRG.23753.1	PC-3p-14255_149	CDKN2B:ENST00000276925
lncRNA	.:MSTRG.23760.1	PC-3p-14255_149	CDKN2B:ENST00000276925
lncRNA	.:MSTRG.23776.1	PC-3p-14255_149	CDKN2B:ENST00000276925
lncRNA	.:MSTRG.25236.1	PC-3p-14255_149	CDKN2B:ENST00000276925
lncRNA	.:MSTRG.25242.1	PC-3p-14255_149	CDKN2B:ENST00000276925
lncRNA	AC008957:MSTRG.25927.2	PC-3p-14255_149	CDKN2B:ENST00000276925
lncRNA	AC015712:ENST00000560068	PC-3p-14255_149	CDKN2B:ENST00000276925
lncRNA	AC020978:ENST00000571197	PC-3p-14255_149	CDKN2B:ENST00000276925
lncRNA	AC097478:MSTRG.24911.12	PC-3p-14255_149	CDKN2B:ENST00000276925
lncRNA	AL160254:MSTRG.8843.4	PC-3p-14255_149	CDKN2B:ENST00000276925
lncRNA	AL353997:ENST00000579352	PC-3p-14255_149	CDKN2B:ENST00000276925
lncRNA	AL357033:ENST00000370520	PC-3p-14255_149	CDKN2B:ENST00000276925
lncRNA	AL359220:ENST00000500036	PC-3p-14255_149	CDKN2B:ENST00000276925
lncRNA	ALG1L6P:MSTRG.23013.2	PC-3p-14255_149	CDKN2B:ENST00000276925
lncRNA	ARID5B:MSTRG.3874.1	PC-3p-14255_149	CDKN2B:ENST00000276925
lncRNA	BRD3OS:MSTRG.33432.3	PC-3p-14255_149	CDKN2B:ENST00000276925
lncRNA	CREB1:MSTRG.19830.16	PC-3p-14255_149	CDKN2B:ENST00000276925
lncRNA	CYP4F26P:MSTRG.32430.3	PC-3p-14255_149	CDKN2B:ENST00000276925
lncRNA	FENDRR:ENST00000598996	PC-3p-14255_149	CDKN2B:ENST00000276925
lncRNA	FENDRR:ENST00000599749	PC-3p-14255_149	CDKN2B:ENST00000276925
lncRNA	FENDRR:MSTRG.13193.9	PC-3p-14255_149	CDKN2B:ENST00000276925
lncRNA	FENDRR:MSTRG.13194.1	PC-3p-14255_149	CDKN2B:ENST00000276925
lncRNA	FOXQ1:MSTRG.27375.1	PC-3p-14255_149	CDKN2B:ENST00000276925
lncRNA	HCP5:ENST00000541196	PC-3p-14255_149	CDKN2B:ENST00000276925
lncRNA	HMGA2-AS1:ENST00000356215	PC-3p-14255_149	CDKN2B:ENST00000276925
lncRNA	LEMD1:MSTRG.2799.1	PC-3p-14255_149	CDKN2B:ENST00000276925
lncRNA	LEMD1:MSTRG.2802.1	PC-3p-14255_149	CDKN2B:ENST00000276925
lncRNA	LINC00662:ENST00000586954	PC-3p-14255_149	CDKN2B:ENST00000276925
lncRNA	LINC01291:ENST00000377469	PC-3p-14255_149	CDKN2B:ENST00000276925
lncRNA	LINC02615:MSTRG.25231.1	PC-3p-14255_149	CDKN2B:ENST00000276925
lncRNA	MALAT1:MSTRG.5556.14	PC-3p-14255_149	CDKN2B:ENST00000276925
lncRNA	NFIA:MSTRG.1182.2	PC-3p-14255_149	CDKN2B:ENST00000276925
lncRNA	PECAM1:MSTRG.14975.10	PC-3p-14255_149	CDKN2B:ENST00000276925
lncRNA	RANBP3L:MSTRG.25925.5	PC-3p-14255_149	CDKN2B:ENST00000276925
lncRNA	SGO1-AS1:MSTRG.22450.9	PC-3p-14255_149	CDKN2B:ENST00000276925
lncRNA	SLC22A3:MSTRG.29166.3	PC-3p-14255_149	CDKN2B:ENST00000276925
lncRNA	STARD4:MSTRG.26591.1	PC-3p-14255_149	CDKN2B:ENST00000276925
lncRNA	TFAP2A-AS1:MSTRG.27487.2	PC-3p-14255_149	CDKN2B:ENST00000276925
lncRNA	VRK2:MSTRG.18363.2	PC-3p-14255_149	CDKN2B:ENST00000276925
lncRNA	WARS2-AS1:MSTRG.1790.9	PC-3p-14255_149	CDKN2B:ENST00000276925
circRNA	ciRNA685	PC-3p-14255_149	CDKN2B:ENST00000276925
circRNA	circRNA2527	PC-3p-14255_149	CDKN2B:ENST00000276925
circRNA	circRNA2560	PC-3p-14255_149	CDKN2B:ENST00000276925
circRNA	circRNA4749	PC-3p-14255_149	CDKN2B:ENST00000276925
circRNA	circRNA4750	PC-3p-14255_149	CDKN2B:ENST00000276925
circRNA	circRNA9874	PC-3p-14255_149	CDKN2B:ENST00000276925
circRNA	hsa_circ_0000606	PC-3p-14255_149	CDKN2B:ENST00000276925
circRNA	hsa_circ_0005332	PC-3p-14255_149	CDKN2B:ENST00000276925
circRNA	hsa_circ_0008250	PC-3p-14255_149	CDKN2B:ENST00000276925
circRNA	hsa_circ_0089274	PC-3p-14255_149	CDKN2B:ENST00000276925
lncRNA	.:MSTRG.23753.1	PC-3p-14255_149	CEBPG:ENST00000585933
lncRNA	.:MSTRG.23760.1	PC-3p-14255_149	CEBPG:ENST00000585933
lncRNA	.:MSTRG.23776.1	PC-3p-14255_149	CEBPG:ENST00000585933
lncRNA	.:MSTRG.25236.1	PC-3p-14255_149	CEBPG:ENST00000585933
lncRNA	.:MSTRG.25242.1	PC-3p-14255_149	CEBPG:ENST00000585933
lncRNA	AC008957:MSTRG.25927.2	PC-3p-14255_149	CEBPG:ENST00000585933
lncRNA	AC015712:ENST00000560068	PC-3p-14255_149	CEBPG:ENST00000585933
lncRNA	AC020978:ENST00000571197	PC-3p-14255_149	CEBPG:ENST00000585933
lncRNA	AC097478:MSTRG.24911.12	PC-3p-14255_149	CEBPG:ENST00000585933
lncRNA	AL160254:MSTRG.8843.4	PC-3p-14255_149	CEBPG:ENST00000585933
lncRNA	AL353997:ENST00000579352	PC-3p-14255_149	CEBPG:ENST00000585933
lncRNA	AL357033:ENST00000370520	PC-3p-14255_149	CEBPG:ENST00000585933
lncRNA	AL359220:ENST00000500036	PC-3p-14255_149	CEBPG:ENST00000585933
lncRNA	ALG1L6P:MSTRG.23013.2	PC-3p-14255_149	CEBPG:ENST00000585933
lncRNA	ARID5B:MSTRG.3874.1	PC-3p-14255_149	CEBPG:ENST00000585933
lncRNA	BRD3OS:MSTRG.33432.3	PC-3p-14255_149	CEBPG:ENST00000585933
lncRNA	CREB1:MSTRG.19830.16	PC-3p-14255_149	CEBPG:ENST00000585933
lncRNA	CYP4F26P:MSTRG.32430.3	PC-3p-14255_149	CEBPG:ENST00000585933
lncRNA	FENDRR:ENST00000598996	PC-3p-14255_149	CEBPG:ENST00000585933
lncRNA	FENDRR:ENST00000599749	PC-3p-14255_149	CEBPG:ENST00000585933
lncRNA	FENDRR:MSTRG.13193.9	PC-3p-14255_149	CEBPG:ENST00000585933
lncRNA	FENDRR:MSTRG.13194.1	PC-3p-14255_149	CEBPG:ENST00000585933
lncRNA	FOXQ1:MSTRG.27375.1	PC-3p-14255_149	CEBPG:ENST00000585933
lncRNA	HCP5:ENST00000541196	PC-3p-14255_149	CEBPG:ENST00000585933
lncRNA	HMGA2-AS1:ENST00000356215	PC-3p-14255_149	CEBPG:ENST00000585933
lncRNA	LEMD1:MSTRG.2799.1	PC-3p-14255_149	CEBPG:ENST00000585933
lncRNA	LEMD1:MSTRG.2802.1	PC-3p-14255_149	CEBPG:ENST00000585933
lncRNA	LINC00662:ENST00000586954	PC-3p-14255_149	CEBPG:ENST00000585933
lncRNA	LINC01291:ENST00000377469	PC-3p-14255_149	CEBPG:ENST00000585933
lncRNA	LINC02615:MSTRG.25231.1	PC-3p-14255_149	CEBPG:ENST00000585933
lncRNA	MALAT1:MSTRG.5556.14	PC-3p-14255_149	CEBPG:ENST00000585933
lncRNA	NFIA:MSTRG.1182.2	PC-3p-14255_149	CEBPG:ENST00000585933
lncRNA	PECAM1:MSTRG.14975.10	PC-3p-14255_149	CEBPG:ENST00000585933
lncRNA	RANBP3L:MSTRG.25925.5	PC-3p-14255_149	CEBPG:ENST00000585933
lncRNA	SGO1-AS1:MSTRG.22450.9	PC-3p-14255_149	CEBPG:ENST00000585933
lncRNA	SLC22A3:MSTRG.29166.3	PC-3p-14255_149	CEBPG:ENST00000585933
lncRNA	STARD4:MSTRG.26591.1	PC-3p-14255_149	CEBPG:ENST00000585933
lncRNA	TFAP2A-AS1:MSTRG.27487.2	PC-3p-14255_149	CEBPG:ENST00000585933
lncRNA	VRK2:MSTRG.18363.2	PC-3p-14255_149	CEBPG:ENST00000585933
lncRNA	WARS2-AS1:MSTRG.1790.9	PC-3p-14255_149	CEBPG:ENST00000585933
circRNA	ciRNA685	PC-3p-14255_149	CEBPG:ENST00000585933
circRNA	circRNA2527	PC-3p-14255_149	CEBPG:ENST00000585933
circRNA	circRNA2560	PC-3p-14255_149	CEBPG:ENST00000585933
circRNA	circRNA4749	PC-3p-14255_149	CEBPG:ENST00000585933
circRNA	circRNA4750	PC-3p-14255_149	CEBPG:ENST00000585933
circRNA	circRNA9874	PC-3p-14255_149	CEBPG:ENST00000585933
circRNA	hsa_circ_0000606	PC-3p-14255_149	CEBPG:ENST00000585933
circRNA	hsa_circ_0005332	PC-3p-14255_149	CEBPG:ENST00000585933
circRNA	hsa_circ_0008250	PC-3p-14255_149	CEBPG:ENST00000585933
circRNA	hsa_circ_0089274	PC-3p-14255_149	CEBPG:ENST00000585933
lncRNA	.:MSTRG.23753.1	PC-3p-14255_149	CEMIP:ENST00000220244
lncRNA	.:MSTRG.23760.1	PC-3p-14255_149	CEMIP:ENST00000220244
lncRNA	.:MSTRG.23776.1	PC-3p-14255_149	CEMIP:ENST00000220244
lncRNA	.:MSTRG.25236.1	PC-3p-14255_149	CEMIP:ENST00000220244
lncRNA	.:MSTRG.25242.1	PC-3p-14255_149	CEMIP:ENST00000220244
lncRNA	AC008957:MSTRG.25927.2	PC-3p-14255_149	CEMIP:ENST00000220244
lncRNA	AC015712:ENST00000560068	PC-3p-14255_149	CEMIP:ENST00000220244
lncRNA	AC020978:ENST00000571197	PC-3p-14255_149	CEMIP:ENST00000220244
lncRNA	AC097478:MSTRG.24911.12	PC-3p-14255_149	CEMIP:ENST00000220244
lncRNA	AL160254:MSTRG.8843.4	PC-3p-14255_149	CEMIP:ENST00000220244
lncRNA	AL353997:ENST00000579352	PC-3p-14255_149	CEMIP:ENST00000220244
lncRNA	AL357033:ENST00000370520	PC-3p-14255_149	CEMIP:ENST00000220244
lncRNA	AL359220:ENST00000500036	PC-3p-14255_149	CEMIP:ENST00000220244
lncRNA	ALG1L6P:MSTRG.23013.2	PC-3p-14255_149	CEMIP:ENST00000220244
lncRNA	ARID5B:MSTRG.3874.1	PC-3p-14255_149	CEMIP:ENST00000220244
lncRNA	BRD3OS:MSTRG.33432.3	PC-3p-14255_149	CEMIP:ENST00000220244
lncRNA	CREB1:MSTRG.19830.16	PC-3p-14255_149	CEMIP:ENST00000220244
lncRNA	CYP4F26P:MSTRG.32430.3	PC-3p-14255_149	CEMIP:ENST00000220244
lncRNA	FENDRR:ENST00000598996	PC-3p-14255_149	CEMIP:ENST00000220244
lncRNA	FENDRR:ENST00000599749	PC-3p-14255_149	CEMIP:ENST00000220244
lncRNA	FENDRR:MSTRG.13193.9	PC-3p-14255_149	CEMIP:ENST00000220244
lncRNA	FENDRR:MSTRG.13194.1	PC-3p-14255_149	CEMIP:ENST00000220244
lncRNA	FOXQ1:MSTRG.27375.1	PC-3p-14255_149	CEMIP:ENST00000220244
lncRNA	HCP5:ENST00000541196	PC-3p-14255_149	CEMIP:ENST00000220244
lncRNA	HMGA2-AS1:ENST00000356215	PC-3p-14255_149	CEMIP:ENST00000220244
lncRNA	LEMD1:MSTRG.2799.1	PC-3p-14255_149	CEMIP:ENST00000220244
lncRNA	LEMD1:MSTRG.2802.1	PC-3p-14255_149	CEMIP:ENST00000220244
lncRNA	LINC00662:ENST00000586954	PC-3p-14255_149	CEMIP:ENST00000220244
lncRNA	LINC01291:ENST00000377469	PC-3p-14255_149	CEMIP:ENST00000220244
lncRNA	LINC02615:MSTRG.25231.1	PC-3p-14255_149	CEMIP:ENST00000220244
lncRNA	MALAT1:MSTRG.5556.14	PC-3p-14255_149	CEMIP:ENST00000220244
lncRNA	NFIA:MSTRG.1182.2	PC-3p-14255_149	CEMIP:ENST00000220244
lncRNA	PECAM1:MSTRG.14975.10	PC-3p-14255_149	CEMIP:ENST00000220244
lncRNA	RANBP3L:MSTRG.25925.5	PC-3p-14255_149	CEMIP:ENST00000220244
lncRNA	SGO1-AS1:MSTRG.22450.9	PC-3p-14255_149	CEMIP:ENST00000220244
lncRNA	SLC22A3:MSTRG.29166.3	PC-3p-14255_149	CEMIP:ENST00000220244
lncRNA	STARD4:MSTRG.26591.1	PC-3p-14255_149	CEMIP:ENST00000220244
lncRNA	TFAP2A-AS1:MSTRG.27487.2	PC-3p-14255_149	CEMIP:ENST00000220244
lncRNA	VRK2:MSTRG.18363.2	PC-3p-14255_149	CEMIP:ENST00000220244
lncRNA	WARS2-AS1:MSTRG.1790.9	PC-3p-14255_149	CEMIP:ENST00000220244
circRNA	ciRNA685	PC-3p-14255_149	CEMIP:ENST00000220244
circRNA	circRNA2527	PC-3p-14255_149	CEMIP:ENST00000220244
circRNA	circRNA2560	PC-3p-14255_149	CEMIP:ENST00000220244
circRNA	circRNA4749	PC-3p-14255_149	CEMIP:ENST00000220244
circRNA	circRNA4750	PC-3p-14255_149	CEMIP:ENST00000220244
circRNA	circRNA9874	PC-3p-14255_149	CEMIP:ENST00000220244
circRNA	hsa_circ_0000606	PC-3p-14255_149	CEMIP:ENST00000220244
circRNA	hsa_circ_0005332	PC-3p-14255_149	CEMIP:ENST00000220244
circRNA	hsa_circ_0008250	PC-3p-14255_149	CEMIP:ENST00000220244
circRNA	hsa_circ_0089274	PC-3p-14255_149	CEMIP:ENST00000220244
lncRNA	.:MSTRG.23753.1	PC-3p-14255_149	CSNK2A1:ENST00000645910
lncRNA	.:MSTRG.23760.1	PC-3p-14255_149	CSNK2A1:ENST00000645910
lncRNA	.:MSTRG.23776.1	PC-3p-14255_149	CSNK2A1:ENST00000645910
lncRNA	.:MSTRG.25236.1	PC-3p-14255_149	CSNK2A1:ENST00000645910
lncRNA	.:MSTRG.25242.1	PC-3p-14255_149	CSNK2A1:ENST00000645910
lncRNA	AC008957:MSTRG.25927.2	PC-3p-14255_149	CSNK2A1:ENST00000645910
lncRNA	AC015712:ENST00000560068	PC-3p-14255_149	CSNK2A1:ENST00000645910
lncRNA	AC020978:ENST00000571197	PC-3p-14255_149	CSNK2A1:ENST00000645910
lncRNA	AC097478:MSTRG.24911.12	PC-3p-14255_149	CSNK2A1:ENST00000645910
lncRNA	AL160254:MSTRG.8843.4	PC-3p-14255_149	CSNK2A1:ENST00000645910
lncRNA	AL353997:ENST00000579352	PC-3p-14255_149	CSNK2A1:ENST00000645910
lncRNA	AL357033:ENST00000370520	PC-3p-14255_149	CSNK2A1:ENST00000645910
lncRNA	AL359220:ENST00000500036	PC-3p-14255_149	CSNK2A1:ENST00000645910
lncRNA	ALG1L6P:MSTRG.23013.2	PC-3p-14255_149	CSNK2A1:ENST00000645910
lncRNA	ARID5B:MSTRG.3874.1	PC-3p-14255_149	CSNK2A1:ENST00000645910
lncRNA	BRD3OS:MSTRG.33432.3	PC-3p-14255_149	CSNK2A1:ENST00000645910
lncRNA	CREB1:MSTRG.19830.16	PC-3p-14255_149	CSNK2A1:ENST00000645910
lncRNA	CYP4F26P:MSTRG.32430.3	PC-3p-14255_149	CSNK2A1:ENST00000645910
lncRNA	FENDRR:ENST00000598996	PC-3p-14255_149	CSNK2A1:ENST00000645910
lncRNA	FENDRR:ENST00000599749	PC-3p-14255_149	CSNK2A1:ENST00000645910
lncRNA	FENDRR:MSTRG.13193.9	PC-3p-14255_149	CSNK2A1:ENST00000645910
lncRNA	FENDRR:MSTRG.13194.1	PC-3p-14255_149	CSNK2A1:ENST00000645910
lncRNA	FOXQ1:MSTRG.27375.1	PC-3p-14255_149	CSNK2A1:ENST00000645910
lncRNA	HCP5:ENST00000541196	PC-3p-14255_149	CSNK2A1:ENST00000645910
lncRNA	HMGA2-AS1:ENST00000356215	PC-3p-14255_149	CSNK2A1:ENST00000645910
lncRNA	LEMD1:MSTRG.2799.1	PC-3p-14255_149	CSNK2A1:ENST00000645910
lncRNA	LEMD1:MSTRG.2802.1	PC-3p-14255_149	CSNK2A1:ENST00000645910
lncRNA	LINC00662:ENST00000586954	PC-3p-14255_149	CSNK2A1:ENST00000645910
lncRNA	LINC01291:ENST00000377469	PC-3p-14255_149	CSNK2A1:ENST00000645910
lncRNA	LINC02615:MSTRG.25231.1	PC-3p-14255_149	CSNK2A1:ENST00000645910
lncRNA	MALAT1:MSTRG.5556.14	PC-3p-14255_149	CSNK2A1:ENST00000645910
lncRNA	NFIA:MSTRG.1182.2	PC-3p-14255_149	CSNK2A1:ENST00000645910
lncRNA	PECAM1:MSTRG.14975.10	PC-3p-14255_149	CSNK2A1:ENST00000645910
lncRNA	RANBP3L:MSTRG.25925.5	PC-3p-14255_149	CSNK2A1:ENST00000645910
lncRNA	SGO1-AS1:MSTRG.22450.9	PC-3p-14255_149	CSNK2A1:ENST00000645910
lncRNA	SLC22A3:MSTRG.29166.3	PC-3p-14255_149	CSNK2A1:ENST00000645910
lncRNA	STARD4:MSTRG.26591.1	PC-3p-14255_149	CSNK2A1:ENST00000645910
lncRNA	TFAP2A-AS1:MSTRG.27487.2	PC-3p-14255_149	CSNK2A1:ENST00000645910
lncRNA	VRK2:MSTRG.18363.2	PC-3p-14255_149	CSNK2A1:ENST00000645910
lncRNA	WARS2-AS1:MSTRG.1790.9	PC-3p-14255_149	CSNK2A1:ENST00000645910
circRNA	ciRNA685	PC-3p-14255_149	CSNK2A1:ENST00000645910
circRNA	circRNA2527	PC-3p-14255_149	CSNK2A1:ENST00000645910
circRNA	circRNA2560	PC-3p-14255_149	CSNK2A1:ENST00000645910
circRNA	circRNA4749	PC-3p-14255_149	CSNK2A1:ENST00000645910
circRNA	circRNA4750	PC-3p-14255_149	CSNK2A1:ENST00000645910
circRNA	circRNA9874	PC-3p-14255_149	CSNK2A1:ENST00000645910
circRNA	hsa_circ_0000606	PC-3p-14255_149	CSNK2A1:ENST00000645910
circRNA	hsa_circ_0005332	PC-3p-14255_149	CSNK2A1:ENST00000645910
circRNA	hsa_circ_0008250	PC-3p-14255_149	CSNK2A1:ENST00000645910
circRNA	hsa_circ_0089274	PC-3p-14255_149	CSNK2A1:ENST00000645910
lncRNA	.:MSTRG.23753.1	PC-3p-14255_149	CTSB:ENST00000533455
lncRNA	.:MSTRG.23760.1	PC-3p-14255_149	CTSB:ENST00000533455
lncRNA	.:MSTRG.23776.1	PC-3p-14255_149	CTSB:ENST00000533455
lncRNA	.:MSTRG.25236.1	PC-3p-14255_149	CTSB:ENST00000533455
lncRNA	.:MSTRG.25242.1	PC-3p-14255_149	CTSB:ENST00000533455
lncRNA	AC008957:MSTRG.25927.2	PC-3p-14255_149	CTSB:ENST00000533455
lncRNA	AC015712:ENST00000560068	PC-3p-14255_149	CTSB:ENST00000533455
lncRNA	AC020978:ENST00000571197	PC-3p-14255_149	CTSB:ENST00000533455
lncRNA	AC097478:MSTRG.24911.12	PC-3p-14255_149	CTSB:ENST00000533455
lncRNA	AL160254:MSTRG.8843.4	PC-3p-14255_149	CTSB:ENST00000533455
lncRNA	AL353997:ENST00000579352	PC-3p-14255_149	CTSB:ENST00000533455
lncRNA	AL357033:ENST00000370520	PC-3p-14255_149	CTSB:ENST00000533455
lncRNA	AL359220:ENST00000500036	PC-3p-14255_149	CTSB:ENST00000533455
lncRNA	ALG1L6P:MSTRG.23013.2	PC-3p-14255_149	CTSB:ENST00000533455
lncRNA	ARID5B:MSTRG.3874.1	PC-3p-14255_149	CTSB:ENST00000533455
lncRNA	BRD3OS:MSTRG.33432.3	PC-3p-14255_149	CTSB:ENST00000533455
lncRNA	CREB1:MSTRG.19830.16	PC-3p-14255_149	CTSB:ENST00000533455
lncRNA	CYP4F26P:MSTRG.32430.3	PC-3p-14255_149	CTSB:ENST00000533455
lncRNA	FENDRR:ENST00000598996	PC-3p-14255_149	CTSB:ENST00000533455
lncRNA	FENDRR:ENST00000599749	PC-3p-14255_149	CTSB:ENST00000533455
lncRNA	FENDRR:MSTRG.13193.9	PC-3p-14255_149	CTSB:ENST00000533455
lncRNA	FENDRR:MSTRG.13194.1	PC-3p-14255_149	CTSB:ENST00000533455
lncRNA	FOXQ1:MSTRG.27375.1	PC-3p-14255_149	CTSB:ENST00000533455
lncRNA	HCP5:ENST00000541196	PC-3p-14255_149	CTSB:ENST00000533455
lncRNA	HMGA2-AS1:ENST00000356215	PC-3p-14255_149	CTSB:ENST00000533455
lncRNA	LEMD1:MSTRG.2799.1	PC-3p-14255_149	CTSB:ENST00000533455
lncRNA	LEMD1:MSTRG.2802.1	PC-3p-14255_149	CTSB:ENST00000533455
lncRNA	LINC00662:ENST00000586954	PC-3p-14255_149	CTSB:ENST00000533455
lncRNA	LINC01291:ENST00000377469	PC-3p-14255_149	CTSB:ENST00000533455
lncRNA	LINC02615:MSTRG.25231.1	PC-3p-14255_149	CTSB:ENST00000533455
lncRNA	MALAT1:MSTRG.5556.14	PC-3p-14255_149	CTSB:ENST00000533455
lncRNA	NFIA:MSTRG.1182.2	PC-3p-14255_149	CTSB:ENST00000533455
lncRNA	PECAM1:MSTRG.14975.10	PC-3p-14255_149	CTSB:ENST00000533455
lncRNA	RANBP3L:MSTRG.25925.5	PC-3p-14255_149	CTSB:ENST00000533455
lncRNA	SGO1-AS1:MSTRG.22450.9	PC-3p-14255_149	CTSB:ENST00000533455
lncRNA	SLC22A3:MSTRG.29166.3	PC-3p-14255_149	CTSB:ENST00000533455
lncRNA	STARD4:MSTRG.26591.1	PC-3p-14255_149	CTSB:ENST00000533455
lncRNA	TFAP2A-AS1:MSTRG.27487.2	PC-3p-14255_149	CTSB:ENST00000533455
lncRNA	VRK2:MSTRG.18363.2	PC-3p-14255_149	CTSB:ENST00000533455
lncRNA	WARS2-AS1:MSTRG.1790.9	PC-3p-14255_149	CTSB:ENST00000533455
circRNA	ciRNA685	PC-3p-14255_149	CTSB:ENST00000533455
circRNA	circRNA2527	PC-3p-14255_149	CTSB:ENST00000533455
circRNA	circRNA2560	PC-3p-14255_149	CTSB:ENST00000533455
circRNA	circRNA4749	PC-3p-14255_149	CTSB:ENST00000533455
circRNA	circRNA4750	PC-3p-14255_149	CTSB:ENST00000533455
circRNA	circRNA9874	PC-3p-14255_149	CTSB:ENST00000533455
circRNA	hsa_circ_0000606	PC-3p-14255_149	CTSB:ENST00000533455
circRNA	hsa_circ_0005332	PC-3p-14255_149	CTSB:ENST00000533455
circRNA	hsa_circ_0008250	PC-3p-14255_149	CTSB:ENST00000533455
circRNA	hsa_circ_0089274	PC-3p-14255_149	CTSB:ENST00000533455
lncRNA	.:MSTRG.23753.1	PC-3p-14255_149	DNAJC14:ENST00000357606
lncRNA	.:MSTRG.23760.1	PC-3p-14255_149	DNAJC14:ENST00000357606
lncRNA	.:MSTRG.23776.1	PC-3p-14255_149	DNAJC14:ENST00000357606
lncRNA	.:MSTRG.25236.1	PC-3p-14255_149	DNAJC14:ENST00000357606
lncRNA	.:MSTRG.25242.1	PC-3p-14255_149	DNAJC14:ENST00000357606
lncRNA	AC008957:MSTRG.25927.2	PC-3p-14255_149	DNAJC14:ENST00000357606
lncRNA	AC015712:ENST00000560068	PC-3p-14255_149	DNAJC14:ENST00000357606
lncRNA	AC020978:ENST00000571197	PC-3p-14255_149	DNAJC14:ENST00000357606
lncRNA	AC097478:MSTRG.24911.12	PC-3p-14255_149	DNAJC14:ENST00000357606
lncRNA	AL160254:MSTRG.8843.4	PC-3p-14255_149	DNAJC14:ENST00000357606
lncRNA	AL353997:ENST00000579352	PC-3p-14255_149	DNAJC14:ENST00000357606
lncRNA	AL357033:ENST00000370520	PC-3p-14255_149	DNAJC14:ENST00000357606
lncRNA	AL359220:ENST00000500036	PC-3p-14255_149	DNAJC14:ENST00000357606
lncRNA	ALG1L6P:MSTRG.23013.2	PC-3p-14255_149	DNAJC14:ENST00000357606
lncRNA	ARID5B:MSTRG.3874.1	PC-3p-14255_149	DNAJC14:ENST00000357606
lncRNA	BRD3OS:MSTRG.33432.3	PC-3p-14255_149	DNAJC14:ENST00000357606
lncRNA	CREB1:MSTRG.19830.16	PC-3p-14255_149	DNAJC14:ENST00000357606
lncRNA	CYP4F26P:MSTRG.32430.3	PC-3p-14255_149	DNAJC14:ENST00000357606
lncRNA	FENDRR:ENST00000598996	PC-3p-14255_149	DNAJC14:ENST00000357606
lncRNA	FENDRR:ENST00000599749	PC-3p-14255_149	DNAJC14:ENST00000357606
lncRNA	FENDRR:MSTRG.13193.9	PC-3p-14255_149	DNAJC14:ENST00000357606
lncRNA	FENDRR:MSTRG.13194.1	PC-3p-14255_149	DNAJC14:ENST00000357606
lncRNA	FOXQ1:MSTRG.27375.1	PC-3p-14255_149	DNAJC14:ENST00000357606
lncRNA	HCP5:ENST00000541196	PC-3p-14255_149	DNAJC14:ENST00000357606
lncRNA	HMGA2-AS1:ENST00000356215	PC-3p-14255_149	DNAJC14:ENST00000357606
lncRNA	LEMD1:MSTRG.2799.1	PC-3p-14255_149	DNAJC14:ENST00000357606
lncRNA	LEMD1:MSTRG.2802.1	PC-3p-14255_149	DNAJC14:ENST00000357606
lncRNA	LINC00662:ENST00000586954	PC-3p-14255_149	DNAJC14:ENST00000357606
lncRNA	LINC01291:ENST00000377469	PC-3p-14255_149	DNAJC14:ENST00000357606
lncRNA	LINC02615:MSTRG.25231.1	PC-3p-14255_149	DNAJC14:ENST00000357606
lncRNA	MALAT1:MSTRG.5556.14	PC-3p-14255_149	DNAJC14:ENST00000357606
lncRNA	NFIA:MSTRG.1182.2	PC-3p-14255_149	DNAJC14:ENST00000357606
lncRNA	PECAM1:MSTRG.14975.10	PC-3p-14255_149	DNAJC14:ENST00000357606
lncRNA	RANBP3L:MSTRG.25925.5	PC-3p-14255_149	DNAJC14:ENST00000357606
lncRNA	SGO1-AS1:MSTRG.22450.9	PC-3p-14255_149	DNAJC14:ENST00000357606
lncRNA	SLC22A3:MSTRG.29166.3	PC-3p-14255_149	DNAJC14:ENST00000357606
lncRNA	STARD4:MSTRG.26591.1	PC-3p-14255_149	DNAJC14:ENST00000357606
lncRNA	TFAP2A-AS1:MSTRG.27487.2	PC-3p-14255_149	DNAJC14:ENST00000357606
lncRNA	VRK2:MSTRG.18363.2	PC-3p-14255_149	DNAJC14:ENST00000357606
lncRNA	WARS2-AS1:MSTRG.1790.9	PC-3p-14255_149	DNAJC14:ENST00000357606
circRNA	ciRNA685	PC-3p-14255_149	DNAJC14:ENST00000357606
circRNA	circRNA2527	PC-3p-14255_149	DNAJC14:ENST00000357606
circRNA	circRNA2560	PC-3p-14255_149	DNAJC14:ENST00000357606
circRNA	circRNA4749	PC-3p-14255_149	DNAJC14:ENST00000357606
circRNA	circRNA4750	PC-3p-14255_149	DNAJC14:ENST00000357606
circRNA	circRNA9874	PC-3p-14255_149	DNAJC14:ENST00000357606
circRNA	hsa_circ_0000606	PC-3p-14255_149	DNAJC14:ENST00000357606
circRNA	hsa_circ_0005332	PC-3p-14255_149	DNAJC14:ENST00000357606
circRNA	hsa_circ_0008250	PC-3p-14255_149	DNAJC14:ENST00000357606
circRNA	hsa_circ_0089274	PC-3p-14255_149	DNAJC14:ENST00000357606
lncRNA	.:MSTRG.23753.1	PC-3p-14255_149	DOCK10:ENST00000644695
lncRNA	.:MSTRG.23760.1	PC-3p-14255_149	DOCK10:ENST00000644695
lncRNA	.:MSTRG.23776.1	PC-3p-14255_149	DOCK10:ENST00000644695
lncRNA	.:MSTRG.25236.1	PC-3p-14255_149	DOCK10:ENST00000644695
lncRNA	.:MSTRG.25242.1	PC-3p-14255_149	DOCK10:ENST00000644695
lncRNA	AC008957:MSTRG.25927.2	PC-3p-14255_149	DOCK10:ENST00000644695
lncRNA	AC015712:ENST00000560068	PC-3p-14255_149	DOCK10:ENST00000644695
lncRNA	AC020978:ENST00000571197	PC-3p-14255_149	DOCK10:ENST00000644695
lncRNA	AC097478:MSTRG.24911.12	PC-3p-14255_149	DOCK10:ENST00000644695
lncRNA	AL160254:MSTRG.8843.4	PC-3p-14255_149	DOCK10:ENST00000644695
lncRNA	AL353997:ENST00000579352	PC-3p-14255_149	DOCK10:ENST00000644695
lncRNA	AL357033:ENST00000370520	PC-3p-14255_149	DOCK10:ENST00000644695
lncRNA	AL359220:ENST00000500036	PC-3p-14255_149	DOCK10:ENST00000644695
lncRNA	ALG1L6P:MSTRG.23013.2	PC-3p-14255_149	DOCK10:ENST00000644695
lncRNA	ARID5B:MSTRG.3874.1	PC-3p-14255_149	DOCK10:ENST00000644695
lncRNA	BRD3OS:MSTRG.33432.3	PC-3p-14255_149	DOCK10:ENST00000644695
lncRNA	CREB1:MSTRG.19830.16	PC-3p-14255_149	DOCK10:ENST00000644695
lncRNA	CYP4F26P:MSTRG.32430.3	PC-3p-14255_149	DOCK10:ENST00000644695
lncRNA	FENDRR:ENST00000598996	PC-3p-14255_149	DOCK10:ENST00000644695
lncRNA	FENDRR:ENST00000599749	PC-3p-14255_149	DOCK10:ENST00000644695
lncRNA	FENDRR:MSTRG.13193.9	PC-3p-14255_149	DOCK10:ENST00000644695
lncRNA	FENDRR:MSTRG.13194.1	PC-3p-14255_149	DOCK10:ENST00000644695
lncRNA	FOXQ1:MSTRG.27375.1	PC-3p-14255_149	DOCK10:ENST00000644695
lncRNA	HCP5:ENST00000541196	PC-3p-14255_149	DOCK10:ENST00000644695
lncRNA	HMGA2-AS1:ENST00000356215	PC-3p-14255_149	DOCK10:ENST00000644695
lncRNA	LEMD1:MSTRG.2799.1	PC-3p-14255_149	DOCK10:ENST00000644695
lncRNA	LEMD1:MSTRG.2802.1	PC-3p-14255_149	DOCK10:ENST00000644695
lncRNA	LINC00662:ENST00000586954	PC-3p-14255_149	DOCK10:ENST00000644695
lncRNA	LINC01291:ENST00000377469	PC-3p-14255_149	DOCK10:ENST00000644695
lncRNA	LINC02615:MSTRG.25231.1	PC-3p-14255_149	DOCK10:ENST00000644695
lncRNA	MALAT1:MSTRG.5556.14	PC-3p-14255_149	DOCK10:ENST00000644695
lncRNA	NFIA:MSTRG.1182.2	PC-3p-14255_149	DOCK10:ENST00000644695
lncRNA	PECAM1:MSTRG.14975.10	PC-3p-14255_149	DOCK10:ENST00000644695
lncRNA	RANBP3L:MSTRG.25925.5	PC-3p-14255_149	DOCK10:ENST00000644695
lncRNA	SGO1-AS1:MSTRG.22450.9	PC-3p-14255_149	DOCK10:ENST00000644695
lncRNA	SLC22A3:MSTRG.29166.3	PC-3p-14255_149	DOCK10:ENST00000644695
lncRNA	STARD4:MSTRG.26591.1	PC-3p-14255_149	DOCK10:ENST00000644695
lncRNA	TFAP2A-AS1:MSTRG.27487.2	PC-3p-14255_149	DOCK10:ENST00000644695
lncRNA	VRK2:MSTRG.18363.2	PC-3p-14255_149	DOCK10:ENST00000644695
lncRNA	WARS2-AS1:MSTRG.1790.9	PC-3p-14255_149	DOCK10:ENST00000644695
circRNA	ciRNA685	PC-3p-14255_149	DOCK10:ENST00000644695
circRNA	circRNA2527	PC-3p-14255_149	DOCK10:ENST00000644695
circRNA	circRNA2560	PC-3p-14255_149	DOCK10:ENST00000644695
circRNA	circRNA4749	PC-3p-14255_149	DOCK10:ENST00000644695
circRNA	circRNA4750	PC-3p-14255_149	DOCK10:ENST00000644695
circRNA	circRNA9874	PC-3p-14255_149	DOCK10:ENST00000644695
circRNA	hsa_circ_0000606	PC-3p-14255_149	DOCK10:ENST00000644695
circRNA	hsa_circ_0005332	PC-3p-14255_149	DOCK10:ENST00000644695
circRNA	hsa_circ_0008250	PC-3p-14255_149	DOCK10:ENST00000644695
circRNA	hsa_circ_0089274	PC-3p-14255_149	DOCK10:ENST00000644695
lncRNA	.:MSTRG.23753.1	PC-3p-14255_149	DUSP4:ENST00000240100
lncRNA	.:MSTRG.23760.1	PC-3p-14255_149	DUSP4:ENST00000240100
lncRNA	.:MSTRG.23776.1	PC-3p-14255_149	DUSP4:ENST00000240100
lncRNA	.:MSTRG.25236.1	PC-3p-14255_149	DUSP4:ENST00000240100
lncRNA	.:MSTRG.25242.1	PC-3p-14255_149	DUSP4:ENST00000240100
lncRNA	AC008957:MSTRG.25927.2	PC-3p-14255_149	DUSP4:ENST00000240100
lncRNA	AC015712:ENST00000560068	PC-3p-14255_149	DUSP4:ENST00000240100
lncRNA	AC020978:ENST00000571197	PC-3p-14255_149	DUSP4:ENST00000240100
lncRNA	AC097478:MSTRG.24911.12	PC-3p-14255_149	DUSP4:ENST00000240100
lncRNA	AL160254:MSTRG.8843.4	PC-3p-14255_149	DUSP4:ENST00000240100
lncRNA	AL353997:ENST00000579352	PC-3p-14255_149	DUSP4:ENST00000240100
lncRNA	AL357033:ENST00000370520	PC-3p-14255_149	DUSP4:ENST00000240100
lncRNA	AL359220:ENST00000500036	PC-3p-14255_149	DUSP4:ENST00000240100
lncRNA	ALG1L6P:MSTRG.23013.2	PC-3p-14255_149	DUSP4:ENST00000240100
lncRNA	ARID5B:MSTRG.3874.1	PC-3p-14255_149	DUSP4:ENST00000240100
lncRNA	BRD3OS:MSTRG.33432.3	PC-3p-14255_149	DUSP4:ENST00000240100
lncRNA	CREB1:MSTRG.19830.16	PC-3p-14255_149	DUSP4:ENST00000240100
lncRNA	CYP4F26P:MSTRG.32430.3	PC-3p-14255_149	DUSP4:ENST00000240100
lncRNA	FENDRR:ENST00000598996	PC-3p-14255_149	DUSP4:ENST00000240100
lncRNA	FENDRR:ENST00000599749	PC-3p-14255_149	DUSP4:ENST00000240100
lncRNA	FENDRR:MSTRG.13193.9	PC-3p-14255_149	DUSP4:ENST00000240100
lncRNA	FENDRR:MSTRG.13194.1	PC-3p-14255_149	DUSP4:ENST00000240100
lncRNA	FOXQ1:MSTRG.27375.1	PC-3p-14255_149	DUSP4:ENST00000240100
lncRNA	HCP5:ENST00000541196	PC-3p-14255_149	DUSP4:ENST00000240100
lncRNA	HMGA2-AS1:ENST00000356215	PC-3p-14255_149	DUSP4:ENST00000240100
lncRNA	LEMD1:MSTRG.2799.1	PC-3p-14255_149	DUSP4:ENST00000240100
lncRNA	LEMD1:MSTRG.2802.1	PC-3p-14255_149	DUSP4:ENST00000240100
lncRNA	LINC00662:ENST00000586954	PC-3p-14255_149	DUSP4:ENST00000240100
lncRNA	LINC01291:ENST00000377469	PC-3p-14255_149	DUSP4:ENST00000240100
lncRNA	LINC02615:MSTRG.25231.1	PC-3p-14255_149	DUSP4:ENST00000240100
lncRNA	MALAT1:MSTRG.5556.14	PC-3p-14255_149	DUSP4:ENST00000240100
lncRNA	NFIA:MSTRG.1182.2	PC-3p-14255_149	DUSP4:ENST00000240100
lncRNA	PECAM1:MSTRG.14975.10	PC-3p-14255_149	DUSP4:ENST00000240100
lncRNA	RANBP3L:MSTRG.25925.5	PC-3p-14255_149	DUSP4:ENST00000240100
lncRNA	SGO1-AS1:MSTRG.22450.9	PC-3p-14255_149	DUSP4:ENST00000240100
lncRNA	SLC22A3:MSTRG.29166.3	PC-3p-14255_149	DUSP4:ENST00000240100
lncRNA	STARD4:MSTRG.26591.1	PC-3p-14255_149	DUSP4:ENST00000240100
lncRNA	TFAP2A-AS1:MSTRG.27487.2	PC-3p-14255_149	DUSP4:ENST00000240100
lncRNA	VRK2:MSTRG.18363.2	PC-3p-14255_149	DUSP4:ENST00000240100
lncRNA	WARS2-AS1:MSTRG.1790.9	PC-3p-14255_149	DUSP4:ENST00000240100
circRNA	ciRNA685	PC-3p-14255_149	DUSP4:ENST00000240100
circRNA	circRNA2527	PC-3p-14255_149	DUSP4:ENST00000240100
circRNA	circRNA2560	PC-3p-14255_149	DUSP4:ENST00000240100
circRNA	circRNA4749	PC-3p-14255_149	DUSP4:ENST00000240100
circRNA	circRNA4750	PC-3p-14255_149	DUSP4:ENST00000240100
circRNA	circRNA9874	PC-3p-14255_149	DUSP4:ENST00000240100
circRNA	hsa_circ_0000606	PC-3p-14255_149	DUSP4:ENST00000240100
circRNA	hsa_circ_0005332	PC-3p-14255_149	DUSP4:ENST00000240100
circRNA	hsa_circ_0008250	PC-3p-14255_149	DUSP4:ENST00000240100
circRNA	hsa_circ_0089274	PC-3p-14255_149	DUSP4:ENST00000240100
lncRNA	.:MSTRG.23753.1	PC-3p-14255_149	EPB41L4A:ENST00000261486
lncRNA	.:MSTRG.23760.1	PC-3p-14255_149	EPB41L4A:ENST00000261486
lncRNA	.:MSTRG.23776.1	PC-3p-14255_149	EPB41L4A:ENST00000261486
lncRNA	.:MSTRG.25236.1	PC-3p-14255_149	EPB41L4A:ENST00000261486
lncRNA	.:MSTRG.25242.1	PC-3p-14255_149	EPB41L4A:ENST00000261486
lncRNA	AC008957:MSTRG.25927.2	PC-3p-14255_149	EPB41L4A:ENST00000261486
lncRNA	AC015712:ENST00000560068	PC-3p-14255_149	EPB41L4A:ENST00000261486
lncRNA	AC020978:ENST00000571197	PC-3p-14255_149	EPB41L4A:ENST00000261486
lncRNA	AC097478:MSTRG.24911.12	PC-3p-14255_149	EPB41L4A:ENST00000261486
lncRNA	AL160254:MSTRG.8843.4	PC-3p-14255_149	EPB41L4A:ENST00000261486
lncRNA	AL353997:ENST00000579352	PC-3p-14255_149	EPB41L4A:ENST00000261486
lncRNA	AL357033:ENST00000370520	PC-3p-14255_149	EPB41L4A:ENST00000261486
lncRNA	AL359220:ENST00000500036	PC-3p-14255_149	EPB41L4A:ENST00000261486
lncRNA	ALG1L6P:MSTRG.23013.2	PC-3p-14255_149	EPB41L4A:ENST00000261486
lncRNA	ARID5B:MSTRG.3874.1	PC-3p-14255_149	EPB41L4A:ENST00000261486
lncRNA	BRD3OS:MSTRG.33432.3	PC-3p-14255_149	EPB41L4A:ENST00000261486
lncRNA	CREB1:MSTRG.19830.16	PC-3p-14255_149	EPB41L4A:ENST00000261486
lncRNA	CYP4F26P:MSTRG.32430.3	PC-3p-14255_149	EPB41L4A:ENST00000261486
lncRNA	FENDRR:ENST00000598996	PC-3p-14255_149	EPB41L4A:ENST00000261486
lncRNA	FENDRR:ENST00000599749	PC-3p-14255_149	EPB41L4A:ENST00000261486
lncRNA	FENDRR:MSTRG.13193.9	PC-3p-14255_149	EPB41L4A:ENST00000261486
lncRNA	FENDRR:MSTRG.13194.1	PC-3p-14255_149	EPB41L4A:ENST00000261486
lncRNA	FOXQ1:MSTRG.27375.1	PC-3p-14255_149	EPB41L4A:ENST00000261486
lncRNA	HCP5:ENST00000541196	PC-3p-14255_149	EPB41L4A:ENST00000261486
lncRNA	HMGA2-AS1:ENST00000356215	PC-3p-14255_149	EPB41L4A:ENST00000261486
lncRNA	LEMD1:MSTRG.2799.1	PC-3p-14255_149	EPB41L4A:ENST00000261486
lncRNA	LEMD1:MSTRG.2802.1	PC-3p-14255_149	EPB41L4A:ENST00000261486
lncRNA	LINC00662:ENST00000586954	PC-3p-14255_149	EPB41L4A:ENST00000261486
lncRNA	LINC01291:ENST00000377469	PC-3p-14255_149	EPB41L4A:ENST00000261486
lncRNA	LINC02615:MSTRG.25231.1	PC-3p-14255_149	EPB41L4A:ENST00000261486
lncRNA	MALAT1:MSTRG.5556.14	PC-3p-14255_149	EPB41L4A:ENST00000261486
lncRNA	NFIA:MSTRG.1182.2	PC-3p-14255_149	EPB41L4A:ENST00000261486
lncRNA	PECAM1:MSTRG.14975.10	PC-3p-14255_149	EPB41L4A:ENST00000261486
lncRNA	RANBP3L:MSTRG.25925.5	PC-3p-14255_149	EPB41L4A:ENST00000261486
lncRNA	SGO1-AS1:MSTRG.22450.9	PC-3p-14255_149	EPB41L4A:ENST00000261486
lncRNA	SLC22A3:MSTRG.29166.3	PC-3p-14255_149	EPB41L4A:ENST00000261486
lncRNA	STARD4:MSTRG.26591.1	PC-3p-14255_149	EPB41L4A:ENST00000261486
lncRNA	TFAP2A-AS1:MSTRG.27487.2	PC-3p-14255_149	EPB41L4A:ENST00000261486
lncRNA	VRK2:MSTRG.18363.2	PC-3p-14255_149	EPB41L4A:ENST00000261486
lncRNA	WARS2-AS1:MSTRG.1790.9	PC-3p-14255_149	EPB41L4A:ENST00000261486
circRNA	ciRNA685	PC-3p-14255_149	EPB41L4A:ENST00000261486
circRNA	circRNA2527	PC-3p-14255_149	EPB41L4A:ENST00000261486
circRNA	circRNA2560	PC-3p-14255_149	EPB41L4A:ENST00000261486
circRNA	circRNA4749	PC-3p-14255_149	EPB41L4A:ENST00000261486
circRNA	circRNA4750	PC-3p-14255_149	EPB41L4A:ENST00000261486
circRNA	circRNA9874	PC-3p-14255_149	EPB41L4A:ENST00000261486
circRNA	hsa_circ_0000606	PC-3p-14255_149	EPB41L4A:ENST00000261486
circRNA	hsa_circ_0005332	PC-3p-14255_149	EPB41L4A:ENST00000261486
circRNA	hsa_circ_0008250	PC-3p-14255_149	EPB41L4A:ENST00000261486
circRNA	hsa_circ_0089274	PC-3p-14255_149	EPB41L4A:ENST00000261486
lncRNA	.:MSTRG.23753.1	PC-3p-14255_149	ERAP1:ENST00000443439
lncRNA	.:MSTRG.23760.1	PC-3p-14255_149	ERAP1:ENST00000443439
lncRNA	.:MSTRG.23776.1	PC-3p-14255_149	ERAP1:ENST00000443439
lncRNA	.:MSTRG.25236.1	PC-3p-14255_149	ERAP1:ENST00000443439
lncRNA	.:MSTRG.25242.1	PC-3p-14255_149	ERAP1:ENST00000443439
lncRNA	AC008957:MSTRG.25927.2	PC-3p-14255_149	ERAP1:ENST00000443439
lncRNA	AC015712:ENST00000560068	PC-3p-14255_149	ERAP1:ENST00000443439
lncRNA	AC020978:ENST00000571197	PC-3p-14255_149	ERAP1:ENST00000443439
lncRNA	AC097478:MSTRG.24911.12	PC-3p-14255_149	ERAP1:ENST00000443439
lncRNA	AL160254:MSTRG.8843.4	PC-3p-14255_149	ERAP1:ENST00000443439
lncRNA	AL353997:ENST00000579352	PC-3p-14255_149	ERAP1:ENST00000443439
lncRNA	AL357033:ENST00000370520	PC-3p-14255_149	ERAP1:ENST00000443439
lncRNA	AL359220:ENST00000500036	PC-3p-14255_149	ERAP1:ENST00000443439
lncRNA	ALG1L6P:MSTRG.23013.2	PC-3p-14255_149	ERAP1:ENST00000443439
lncRNA	ARID5B:MSTRG.3874.1	PC-3p-14255_149	ERAP1:ENST00000443439
lncRNA	BRD3OS:MSTRG.33432.3	PC-3p-14255_149	ERAP1:ENST00000443439
lncRNA	CREB1:MSTRG.19830.16	PC-3p-14255_149	ERAP1:ENST00000443439
lncRNA	CYP4F26P:MSTRG.32430.3	PC-3p-14255_149	ERAP1:ENST00000443439
lncRNA	FENDRR:ENST00000598996	PC-3p-14255_149	ERAP1:ENST00000443439
lncRNA	FENDRR:ENST00000599749	PC-3p-14255_149	ERAP1:ENST00000443439
lncRNA	FENDRR:MSTRG.13193.9	PC-3p-14255_149	ERAP1:ENST00000443439
lncRNA	FENDRR:MSTRG.13194.1	PC-3p-14255_149	ERAP1:ENST00000443439
lncRNA	FOXQ1:MSTRG.27375.1	PC-3p-14255_149	ERAP1:ENST00000443439
lncRNA	HCP5:ENST00000541196	PC-3p-14255_149	ERAP1:ENST00000443439
lncRNA	HMGA2-AS1:ENST00000356215	PC-3p-14255_149	ERAP1:ENST00000443439
lncRNA	LEMD1:MSTRG.2799.1	PC-3p-14255_149	ERAP1:ENST00000443439
lncRNA	LEMD1:MSTRG.2802.1	PC-3p-14255_149	ERAP1:ENST00000443439
lncRNA	LINC00662:ENST00000586954	PC-3p-14255_149	ERAP1:ENST00000443439
lncRNA	LINC01291:ENST00000377469	PC-3p-14255_149	ERAP1:ENST00000443439
lncRNA	LINC02615:MSTRG.25231.1	PC-3p-14255_149	ERAP1:ENST00000443439
lncRNA	MALAT1:MSTRG.5556.14	PC-3p-14255_149	ERAP1:ENST00000443439
lncRNA	NFIA:MSTRG.1182.2	PC-3p-14255_149	ERAP1:ENST00000443439
lncRNA	PECAM1:MSTRG.14975.10	PC-3p-14255_149	ERAP1:ENST00000443439
lncRNA	RANBP3L:MSTRG.25925.5	PC-3p-14255_149	ERAP1:ENST00000443439
lncRNA	SGO1-AS1:MSTRG.22450.9	PC-3p-14255_149	ERAP1:ENST00000443439
lncRNA	SLC22A3:MSTRG.29166.3	PC-3p-14255_149	ERAP1:ENST00000443439
lncRNA	STARD4:MSTRG.26591.1	PC-3p-14255_149	ERAP1:ENST00000443439
lncRNA	TFAP2A-AS1:MSTRG.27487.2	PC-3p-14255_149	ERAP1:ENST00000443439
lncRNA	VRK2:MSTRG.18363.2	PC-3p-14255_149	ERAP1:ENST00000443439
lncRNA	WARS2-AS1:MSTRG.1790.9	PC-3p-14255_149	ERAP1:ENST00000443439
circRNA	ciRNA685	PC-3p-14255_149	ERAP1:ENST00000443439
circRNA	circRNA2527	PC-3p-14255_149	ERAP1:ENST00000443439
circRNA	circRNA2560	PC-3p-14255_149	ERAP1:ENST00000443439
circRNA	circRNA4749	PC-3p-14255_149	ERAP1:ENST00000443439
circRNA	circRNA4750	PC-3p-14255_149	ERAP1:ENST00000443439
circRNA	circRNA9874	PC-3p-14255_149	ERAP1:ENST00000443439
circRNA	hsa_circ_0000606	PC-3p-14255_149	ERAP1:ENST00000443439
circRNA	hsa_circ_0005332	PC-3p-14255_149	ERAP1:ENST00000443439
circRNA	hsa_circ_0008250	PC-3p-14255_149	ERAP1:ENST00000443439
circRNA	hsa_circ_0089274	PC-3p-14255_149	ERAP1:ENST00000443439
lncRNA	.:MSTRG.23753.1	PC-3p-14255_149	ERG:ENST00000442448
lncRNA	.:MSTRG.23760.1	PC-3p-14255_149	ERG:ENST00000442448
lncRNA	.:MSTRG.23776.1	PC-3p-14255_149	ERG:ENST00000442448
lncRNA	.:MSTRG.25236.1	PC-3p-14255_149	ERG:ENST00000442448
lncRNA	.:MSTRG.25242.1	PC-3p-14255_149	ERG:ENST00000442448
lncRNA	AC008957:MSTRG.25927.2	PC-3p-14255_149	ERG:ENST00000442448
lncRNA	AC015712:ENST00000560068	PC-3p-14255_149	ERG:ENST00000442448
lncRNA	AC020978:ENST00000571197	PC-3p-14255_149	ERG:ENST00000442448
lncRNA	AC097478:MSTRG.24911.12	PC-3p-14255_149	ERG:ENST00000442448
lncRNA	AL160254:MSTRG.8843.4	PC-3p-14255_149	ERG:ENST00000442448
lncRNA	AL353997:ENST00000579352	PC-3p-14255_149	ERG:ENST00000442448
lncRNA	AL357033:ENST00000370520	PC-3p-14255_149	ERG:ENST00000442448
lncRNA	AL359220:ENST00000500036	PC-3p-14255_149	ERG:ENST00000442448
lncRNA	ALG1L6P:MSTRG.23013.2	PC-3p-14255_149	ERG:ENST00000442448
lncRNA	ARID5B:MSTRG.3874.1	PC-3p-14255_149	ERG:ENST00000442448
lncRNA	BRD3OS:MSTRG.33432.3	PC-3p-14255_149	ERG:ENST00000442448
lncRNA	CREB1:MSTRG.19830.16	PC-3p-14255_149	ERG:ENST00000442448
lncRNA	CYP4F26P:MSTRG.32430.3	PC-3p-14255_149	ERG:ENST00000442448
lncRNA	FENDRR:ENST00000598996	PC-3p-14255_149	ERG:ENST00000442448
lncRNA	FENDRR:ENST00000599749	PC-3p-14255_149	ERG:ENST00000442448
lncRNA	FENDRR:MSTRG.13193.9	PC-3p-14255_149	ERG:ENST00000442448
lncRNA	FENDRR:MSTRG.13194.1	PC-3p-14255_149	ERG:ENST00000442448
lncRNA	FOXQ1:MSTRG.27375.1	PC-3p-14255_149	ERG:ENST00000442448
lncRNA	HCP5:ENST00000541196	PC-3p-14255_149	ERG:ENST00000442448
lncRNA	HMGA2-AS1:ENST00000356215	PC-3p-14255_149	ERG:ENST00000442448
lncRNA	LEMD1:MSTRG.2799.1	PC-3p-14255_149	ERG:ENST00000442448
lncRNA	LEMD1:MSTRG.2802.1	PC-3p-14255_149	ERG:ENST00000442448
lncRNA	LINC00662:ENST00000586954	PC-3p-14255_149	ERG:ENST00000442448
lncRNA	LINC01291:ENST00000377469	PC-3p-14255_149	ERG:ENST00000442448
lncRNA	LINC02615:MSTRG.25231.1	PC-3p-14255_149	ERG:ENST00000442448
lncRNA	MALAT1:MSTRG.5556.14	PC-3p-14255_149	ERG:ENST00000442448
lncRNA	NFIA:MSTRG.1182.2	PC-3p-14255_149	ERG:ENST00000442448
lncRNA	PECAM1:MSTRG.14975.10	PC-3p-14255_149	ERG:ENST00000442448
lncRNA	RANBP3L:MSTRG.25925.5	PC-3p-14255_149	ERG:ENST00000442448
lncRNA	SGO1-AS1:MSTRG.22450.9	PC-3p-14255_149	ERG:ENST00000442448
lncRNA	SLC22A3:MSTRG.29166.3	PC-3p-14255_149	ERG:ENST00000442448
lncRNA	STARD4:MSTRG.26591.1	PC-3p-14255_149	ERG:ENST00000442448
lncRNA	TFAP2A-AS1:MSTRG.27487.2	PC-3p-14255_149	ERG:ENST00000442448
lncRNA	VRK2:MSTRG.18363.2	PC-3p-14255_149	ERG:ENST00000442448
lncRNA	WARS2-AS1:MSTRG.1790.9	PC-3p-14255_149	ERG:ENST00000442448
circRNA	ciRNA685	PC-3p-14255_149	ERG:ENST00000442448
circRNA	circRNA2527	PC-3p-14255_149	ERG:ENST00000442448
circRNA	circRNA2560	PC-3p-14255_149	ERG:ENST00000442448
circRNA	circRNA4749	PC-3p-14255_149	ERG:ENST00000442448
circRNA	circRNA4750	PC-3p-14255_149	ERG:ENST00000442448
circRNA	circRNA9874	PC-3p-14255_149	ERG:ENST00000442448
circRNA	hsa_circ_0000606	PC-3p-14255_149	ERG:ENST00000442448
circRNA	hsa_circ_0005332	PC-3p-14255_149	ERG:ENST00000442448
circRNA	hsa_circ_0008250	PC-3p-14255_149	ERG:ENST00000442448
circRNA	hsa_circ_0089274	PC-3p-14255_149	ERG:ENST00000442448
lncRNA	.:MSTRG.23753.1	PC-3p-14255_149	FAM107B:ENST00000181796
lncRNA	.:MSTRG.23760.1	PC-3p-14255_149	FAM107B:ENST00000181796
lncRNA	.:MSTRG.23776.1	PC-3p-14255_149	FAM107B:ENST00000181796
lncRNA	.:MSTRG.25236.1	PC-3p-14255_149	FAM107B:ENST00000181796
lncRNA	.:MSTRG.25242.1	PC-3p-14255_149	FAM107B:ENST00000181796
lncRNA	AC008957:MSTRG.25927.2	PC-3p-14255_149	FAM107B:ENST00000181796
lncRNA	AC015712:ENST00000560068	PC-3p-14255_149	FAM107B:ENST00000181796
lncRNA	AC020978:ENST00000571197	PC-3p-14255_149	FAM107B:ENST00000181796
lncRNA	AC097478:MSTRG.24911.12	PC-3p-14255_149	FAM107B:ENST00000181796
lncRNA	AL160254:MSTRG.8843.4	PC-3p-14255_149	FAM107B:ENST00000181796
lncRNA	AL353997:ENST00000579352	PC-3p-14255_149	FAM107B:ENST00000181796
lncRNA	AL357033:ENST00000370520	PC-3p-14255_149	FAM107B:ENST00000181796
lncRNA	AL359220:ENST00000500036	PC-3p-14255_149	FAM107B:ENST00000181796
lncRNA	ALG1L6P:MSTRG.23013.2	PC-3p-14255_149	FAM107B:ENST00000181796
lncRNA	ARID5B:MSTRG.3874.1	PC-3p-14255_149	FAM107B:ENST00000181796
lncRNA	BRD3OS:MSTRG.33432.3	PC-3p-14255_149	FAM107B:ENST00000181796
lncRNA	CREB1:MSTRG.19830.16	PC-3p-14255_149	FAM107B:ENST00000181796
lncRNA	CYP4F26P:MSTRG.32430.3	PC-3p-14255_149	FAM107B:ENST00000181796
lncRNA	FENDRR:ENST00000598996	PC-3p-14255_149	FAM107B:ENST00000181796
lncRNA	FENDRR:ENST00000599749	PC-3p-14255_149	FAM107B:ENST00000181796
lncRNA	FENDRR:MSTRG.13193.9	PC-3p-14255_149	FAM107B:ENST00000181796
lncRNA	FENDRR:MSTRG.13194.1	PC-3p-14255_149	FAM107B:ENST00000181796
lncRNA	FOXQ1:MSTRG.27375.1	PC-3p-14255_149	FAM107B:ENST00000181796
lncRNA	HCP5:ENST00000541196	PC-3p-14255_149	FAM107B:ENST00000181796
lncRNA	HMGA2-AS1:ENST00000356215	PC-3p-14255_149	FAM107B:ENST00000181796
lncRNA	LEMD1:MSTRG.2799.1	PC-3p-14255_149	FAM107B:ENST00000181796
lncRNA	LEMD1:MSTRG.2802.1	PC-3p-14255_149	FAM107B:ENST00000181796
lncRNA	LINC00662:ENST00000586954	PC-3p-14255_149	FAM107B:ENST00000181796
lncRNA	LINC01291:ENST00000377469	PC-3p-14255_149	FAM107B:ENST00000181796
lncRNA	LINC02615:MSTRG.25231.1	PC-3p-14255_149	FAM107B:ENST00000181796
lncRNA	MALAT1:MSTRG.5556.14	PC-3p-14255_149	FAM107B:ENST00000181796
lncRNA	NFIA:MSTRG.1182.2	PC-3p-14255_149	FAM107B:ENST00000181796
lncRNA	PECAM1:MSTRG.14975.10	PC-3p-14255_149	FAM107B:ENST00000181796
lncRNA	RANBP3L:MSTRG.25925.5	PC-3p-14255_149	FAM107B:ENST00000181796
lncRNA	SGO1-AS1:MSTRG.22450.9	PC-3p-14255_149	FAM107B:ENST00000181796
lncRNA	SLC22A3:MSTRG.29166.3	PC-3p-14255_149	FAM107B:ENST00000181796
lncRNA	STARD4:MSTRG.26591.1	PC-3p-14255_149	FAM107B:ENST00000181796
lncRNA	TFAP2A-AS1:MSTRG.27487.2	PC-3p-14255_149	FAM107B:ENST00000181796
lncRNA	VRK2:MSTRG.18363.2	PC-3p-14255_149	FAM107B:ENST00000181796
lncRNA	WARS2-AS1:MSTRG.1790.9	PC-3p-14255_149	FAM107B:ENST00000181796
circRNA	ciRNA685	PC-3p-14255_149	FAM107B:ENST00000181796
circRNA	circRNA2527	PC-3p-14255_149	FAM107B:ENST00000181796
circRNA	circRNA2560	PC-3p-14255_149	FAM107B:ENST00000181796
circRNA	circRNA4749	PC-3p-14255_149	FAM107B:ENST00000181796
circRNA	circRNA4750	PC-3p-14255_149	FAM107B:ENST00000181796
circRNA	circRNA9874	PC-3p-14255_149	FAM107B:ENST00000181796
circRNA	hsa_circ_0000606	PC-3p-14255_149	FAM107B:ENST00000181796
circRNA	hsa_circ_0005332	PC-3p-14255_149	FAM107B:ENST00000181796
circRNA	hsa_circ_0008250	PC-3p-14255_149	FAM107B:ENST00000181796
circRNA	hsa_circ_0089274	PC-3p-14255_149	FAM107B:ENST00000181796
lncRNA	.:MSTRG.23753.1	PC-3p-14255_149	FAM219A:ENST00000379080
lncRNA	.:MSTRG.23760.1	PC-3p-14255_149	FAM219A:ENST00000379080
lncRNA	.:MSTRG.23776.1	PC-3p-14255_149	FAM219A:ENST00000379080
lncRNA	.:MSTRG.25236.1	PC-3p-14255_149	FAM219A:ENST00000379080
lncRNA	.:MSTRG.25242.1	PC-3p-14255_149	FAM219A:ENST00000379080
lncRNA	AC008957:MSTRG.25927.2	PC-3p-14255_149	FAM219A:ENST00000379080
lncRNA	AC015712:ENST00000560068	PC-3p-14255_149	FAM219A:ENST00000379080
lncRNA	AC020978:ENST00000571197	PC-3p-14255_149	FAM219A:ENST00000379080
lncRNA	AC097478:MSTRG.24911.12	PC-3p-14255_149	FAM219A:ENST00000379080
lncRNA	AL160254:MSTRG.8843.4	PC-3p-14255_149	FAM219A:ENST00000379080
lncRNA	AL353997:ENST00000579352	PC-3p-14255_149	FAM219A:ENST00000379080
lncRNA	AL357033:ENST00000370520	PC-3p-14255_149	FAM219A:ENST00000379080
lncRNA	AL359220:ENST00000500036	PC-3p-14255_149	FAM219A:ENST00000379080
lncRNA	ALG1L6P:MSTRG.23013.2	PC-3p-14255_149	FAM219A:ENST00000379080
lncRNA	ARID5B:MSTRG.3874.1	PC-3p-14255_149	FAM219A:ENST00000379080
lncRNA	BRD3OS:MSTRG.33432.3	PC-3p-14255_149	FAM219A:ENST00000379080
lncRNA	CREB1:MSTRG.19830.16	PC-3p-14255_149	FAM219A:ENST00000379080
lncRNA	CYP4F26P:MSTRG.32430.3	PC-3p-14255_149	FAM219A:ENST00000379080
lncRNA	FENDRR:ENST00000598996	PC-3p-14255_149	FAM219A:ENST00000379080
lncRNA	FENDRR:ENST00000599749	PC-3p-14255_149	FAM219A:ENST00000379080
lncRNA	FENDRR:MSTRG.13193.9	PC-3p-14255_149	FAM219A:ENST00000379080
lncRNA	FENDRR:MSTRG.13194.1	PC-3p-14255_149	FAM219A:ENST00000379080
lncRNA	FOXQ1:MSTRG.27375.1	PC-3p-14255_149	FAM219A:ENST00000379080
lncRNA	HCP5:ENST00000541196	PC-3p-14255_149	FAM219A:ENST00000379080
lncRNA	HMGA2-AS1:ENST00000356215	PC-3p-14255_149	FAM219A:ENST00000379080
lncRNA	LEMD1:MSTRG.2799.1	PC-3p-14255_149	FAM219A:ENST00000379080
lncRNA	LEMD1:MSTRG.2802.1	PC-3p-14255_149	FAM219A:ENST00000379080
lncRNA	LINC00662:ENST00000586954	PC-3p-14255_149	FAM219A:ENST00000379080
lncRNA	LINC01291:ENST00000377469	PC-3p-14255_149	FAM219A:ENST00000379080
lncRNA	LINC02615:MSTRG.25231.1	PC-3p-14255_149	FAM219A:ENST00000379080
lncRNA	MALAT1:MSTRG.5556.14	PC-3p-14255_149	FAM219A:ENST00000379080
lncRNA	NFIA:MSTRG.1182.2	PC-3p-14255_149	FAM219A:ENST00000379080
lncRNA	PECAM1:MSTRG.14975.10	PC-3p-14255_149	FAM219A:ENST00000379080
lncRNA	RANBP3L:MSTRG.25925.5	PC-3p-14255_149	FAM219A:ENST00000379080
lncRNA	SGO1-AS1:MSTRG.22450.9	PC-3p-14255_149	FAM219A:ENST00000379080
lncRNA	SLC22A3:MSTRG.29166.3	PC-3p-14255_149	FAM219A:ENST00000379080
lncRNA	STARD4:MSTRG.26591.1	PC-3p-14255_149	FAM219A:ENST00000379080
lncRNA	TFAP2A-AS1:MSTRG.27487.2	PC-3p-14255_149	FAM219A:ENST00000379080
lncRNA	VRK2:MSTRG.18363.2	PC-3p-14255_149	FAM219A:ENST00000379080
lncRNA	WARS2-AS1:MSTRG.1790.9	PC-3p-14255_149	FAM219A:ENST00000379080
circRNA	ciRNA685	PC-3p-14255_149	FAM219A:ENST00000379080
circRNA	circRNA2527	PC-3p-14255_149	FAM219A:ENST00000379080
circRNA	circRNA2560	PC-3p-14255_149	FAM219A:ENST00000379080
circRNA	circRNA4749	PC-3p-14255_149	FAM219A:ENST00000379080
circRNA	circRNA4750	PC-3p-14255_149	FAM219A:ENST00000379080
circRNA	circRNA9874	PC-3p-14255_149	FAM219A:ENST00000379080
circRNA	hsa_circ_0000606	PC-3p-14255_149	FAM219A:ENST00000379080
circRNA	hsa_circ_0005332	PC-3p-14255_149	FAM219A:ENST00000379080
circRNA	hsa_circ_0008250	PC-3p-14255_149	FAM219A:ENST00000379080
circRNA	hsa_circ_0089274	PC-3p-14255_149	FAM219A:ENST00000379080
lncRNA	.:MSTRG.23753.1	PC-3p-14255_149	FANCD2:ENST00000421731
lncRNA	.:MSTRG.23760.1	PC-3p-14255_149	FANCD2:ENST00000421731
lncRNA	.:MSTRG.23776.1	PC-3p-14255_149	FANCD2:ENST00000421731
lncRNA	.:MSTRG.25236.1	PC-3p-14255_149	FANCD2:ENST00000421731
lncRNA	.:MSTRG.25242.1	PC-3p-14255_149	FANCD2:ENST00000421731
lncRNA	AC008957:MSTRG.25927.2	PC-3p-14255_149	FANCD2:ENST00000421731
lncRNA	AC015712:ENST00000560068	PC-3p-14255_149	FANCD2:ENST00000421731
lncRNA	AC020978:ENST00000571197	PC-3p-14255_149	FANCD2:ENST00000421731
lncRNA	AC097478:MSTRG.24911.12	PC-3p-14255_149	FANCD2:ENST00000421731
lncRNA	AL160254:MSTRG.8843.4	PC-3p-14255_149	FANCD2:ENST00000421731
lncRNA	AL353997:ENST00000579352	PC-3p-14255_149	FANCD2:ENST00000421731
lncRNA	AL357033:ENST00000370520	PC-3p-14255_149	FANCD2:ENST00000421731
lncRNA	AL359220:ENST00000500036	PC-3p-14255_149	FANCD2:ENST00000421731
lncRNA	ALG1L6P:MSTRG.23013.2	PC-3p-14255_149	FANCD2:ENST00000421731
lncRNA	ARID5B:MSTRG.3874.1	PC-3p-14255_149	FANCD2:ENST00000421731
lncRNA	BRD3OS:MSTRG.33432.3	PC-3p-14255_149	FANCD2:ENST00000421731
lncRNA	CREB1:MSTRG.19830.16	PC-3p-14255_149	FANCD2:ENST00000421731
lncRNA	CYP4F26P:MSTRG.32430.3	PC-3p-14255_149	FANCD2:ENST00000421731
lncRNA	FENDRR:ENST00000598996	PC-3p-14255_149	FANCD2:ENST00000421731
lncRNA	FENDRR:ENST00000599749	PC-3p-14255_149	FANCD2:ENST00000421731
lncRNA	FENDRR:MSTRG.13193.9	PC-3p-14255_149	FANCD2:ENST00000421731
lncRNA	FENDRR:MSTRG.13194.1	PC-3p-14255_149	FANCD2:ENST00000421731
lncRNA	FOXQ1:MSTRG.27375.1	PC-3p-14255_149	FANCD2:ENST00000421731
lncRNA	HCP5:ENST00000541196	PC-3p-14255_149	FANCD2:ENST00000421731
lncRNA	HMGA2-AS1:ENST00000356215	PC-3p-14255_149	FANCD2:ENST00000421731
lncRNA	LEMD1:MSTRG.2799.1	PC-3p-14255_149	FANCD2:ENST00000421731
lncRNA	LEMD1:MSTRG.2802.1	PC-3p-14255_149	FANCD2:ENST00000421731
lncRNA	LINC00662:ENST00000586954	PC-3p-14255_149	FANCD2:ENST00000421731
lncRNA	LINC01291:ENST00000377469	PC-3p-14255_149	FANCD2:ENST00000421731
lncRNA	LINC02615:MSTRG.25231.1	PC-3p-14255_149	FANCD2:ENST00000421731
lncRNA	MALAT1:MSTRG.5556.14	PC-3p-14255_149	FANCD2:ENST00000421731
lncRNA	NFIA:MSTRG.1182.2	PC-3p-14255_149	FANCD2:ENST00000421731
lncRNA	PECAM1:MSTRG.14975.10	PC-3p-14255_149	FANCD2:ENST00000421731
lncRNA	RANBP3L:MSTRG.25925.5	PC-3p-14255_149	FANCD2:ENST00000421731
lncRNA	SGO1-AS1:MSTRG.22450.9	PC-3p-14255_149	FANCD2:ENST00000421731
lncRNA	SLC22A3:MSTRG.29166.3	PC-3p-14255_149	FANCD2:ENST00000421731
lncRNA	STARD4:MSTRG.26591.1	PC-3p-14255_149	FANCD2:ENST00000421731
lncRNA	TFAP2A-AS1:MSTRG.27487.2	PC-3p-14255_149	FANCD2:ENST00000421731
lncRNA	VRK2:MSTRG.18363.2	PC-3p-14255_149	FANCD2:ENST00000421731
lncRNA	WARS2-AS1:MSTRG.1790.9	PC-3p-14255_149	FANCD2:ENST00000421731
circRNA	ciRNA685	PC-3p-14255_149	FANCD2:ENST00000421731
circRNA	circRNA2527	PC-3p-14255_149	FANCD2:ENST00000421731
circRNA	circRNA2560	PC-3p-14255_149	FANCD2:ENST00000421731
circRNA	circRNA4749	PC-3p-14255_149	FANCD2:ENST00000421731
circRNA	circRNA4750	PC-3p-14255_149	FANCD2:ENST00000421731
circRNA	circRNA9874	PC-3p-14255_149	FANCD2:ENST00000421731
circRNA	hsa_circ_0000606	PC-3p-14255_149	FANCD2:ENST00000421731
circRNA	hsa_circ_0005332	PC-3p-14255_149	FANCD2:ENST00000421731
circRNA	hsa_circ_0008250	PC-3p-14255_149	FANCD2:ENST00000421731
circRNA	hsa_circ_0089274	PC-3p-14255_149	FANCD2:ENST00000421731
lncRNA	.:MSTRG.23753.1	PC-3p-14255_149	FIBIN:ENST00000318627
lncRNA	.:MSTRG.23760.1	PC-3p-14255_149	FIBIN:ENST00000318627
lncRNA	.:MSTRG.23776.1	PC-3p-14255_149	FIBIN:ENST00000318627
lncRNA	.:MSTRG.25236.1	PC-3p-14255_149	FIBIN:ENST00000318627
lncRNA	.:MSTRG.25242.1	PC-3p-14255_149	FIBIN:ENST00000318627
lncRNA	AC008957:MSTRG.25927.2	PC-3p-14255_149	FIBIN:ENST00000318627
lncRNA	AC015712:ENST00000560068	PC-3p-14255_149	FIBIN:ENST00000318627
lncRNA	AC020978:ENST00000571197	PC-3p-14255_149	FIBIN:ENST00000318627
lncRNA	AC097478:MSTRG.24911.12	PC-3p-14255_149	FIBIN:ENST00000318627
lncRNA	AL160254:MSTRG.8843.4	PC-3p-14255_149	FIBIN:ENST00000318627
lncRNA	AL353997:ENST00000579352	PC-3p-14255_149	FIBIN:ENST00000318627
lncRNA	AL357033:ENST00000370520	PC-3p-14255_149	FIBIN:ENST00000318627
lncRNA	AL359220:ENST00000500036	PC-3p-14255_149	FIBIN:ENST00000318627
lncRNA	ALG1L6P:MSTRG.23013.2	PC-3p-14255_149	FIBIN:ENST00000318627
lncRNA	ARID5B:MSTRG.3874.1	PC-3p-14255_149	FIBIN:ENST00000318627
lncRNA	BRD3OS:MSTRG.33432.3	PC-3p-14255_149	FIBIN:ENST00000318627
lncRNA	CREB1:MSTRG.19830.16	PC-3p-14255_149	FIBIN:ENST00000318627
lncRNA	CYP4F26P:MSTRG.32430.3	PC-3p-14255_149	FIBIN:ENST00000318627
lncRNA	FENDRR:ENST00000598996	PC-3p-14255_149	FIBIN:ENST00000318627
lncRNA	FENDRR:ENST00000599749	PC-3p-14255_149	FIBIN:ENST00000318627
lncRNA	FENDRR:MSTRG.13193.9	PC-3p-14255_149	FIBIN:ENST00000318627
lncRNA	FENDRR:MSTRG.13194.1	PC-3p-14255_149	FIBIN:ENST00000318627
lncRNA	FOXQ1:MSTRG.27375.1	PC-3p-14255_149	FIBIN:ENST00000318627
lncRNA	HCP5:ENST00000541196	PC-3p-14255_149	FIBIN:ENST00000318627
lncRNA	HMGA2-AS1:ENST00000356215	PC-3p-14255_149	FIBIN:ENST00000318627
lncRNA	LEMD1:MSTRG.2799.1	PC-3p-14255_149	FIBIN:ENST00000318627
lncRNA	LEMD1:MSTRG.2802.1	PC-3p-14255_149	FIBIN:ENST00000318627
lncRNA	LINC00662:ENST00000586954	PC-3p-14255_149	FIBIN:ENST00000318627
lncRNA	LINC01291:ENST00000377469	PC-3p-14255_149	FIBIN:ENST00000318627
lncRNA	LINC02615:MSTRG.25231.1	PC-3p-14255_149	FIBIN:ENST00000318627
lncRNA	MALAT1:MSTRG.5556.14	PC-3p-14255_149	FIBIN:ENST00000318627
lncRNA	NFIA:MSTRG.1182.2	PC-3p-14255_149	FIBIN:ENST00000318627
lncRNA	PECAM1:MSTRG.14975.10	PC-3p-14255_149	FIBIN:ENST00000318627
lncRNA	RANBP3L:MSTRG.25925.5	PC-3p-14255_149	FIBIN:ENST00000318627
lncRNA	SGO1-AS1:MSTRG.22450.9	PC-3p-14255_149	FIBIN:ENST00000318627
lncRNA	SLC22A3:MSTRG.29166.3	PC-3p-14255_149	FIBIN:ENST00000318627
lncRNA	STARD4:MSTRG.26591.1	PC-3p-14255_149	FIBIN:ENST00000318627
lncRNA	TFAP2A-AS1:MSTRG.27487.2	PC-3p-14255_149	FIBIN:ENST00000318627
lncRNA	VRK2:MSTRG.18363.2	PC-3p-14255_149	FIBIN:ENST00000318627
lncRNA	WARS2-AS1:MSTRG.1790.9	PC-3p-14255_149	FIBIN:ENST00000318627
circRNA	ciRNA685	PC-3p-14255_149	FIBIN:ENST00000318627
circRNA	circRNA2527	PC-3p-14255_149	FIBIN:ENST00000318627
circRNA	circRNA2560	PC-3p-14255_149	FIBIN:ENST00000318627
circRNA	circRNA4749	PC-3p-14255_149	FIBIN:ENST00000318627
circRNA	circRNA4750	PC-3p-14255_149	FIBIN:ENST00000318627
circRNA	circRNA9874	PC-3p-14255_149	FIBIN:ENST00000318627
circRNA	hsa_circ_0000606	PC-3p-14255_149	FIBIN:ENST00000318627
circRNA	hsa_circ_0005332	PC-3p-14255_149	FIBIN:ENST00000318627
circRNA	hsa_circ_0008250	PC-3p-14255_149	FIBIN:ENST00000318627
circRNA	hsa_circ_0089274	PC-3p-14255_149	FIBIN:ENST00000318627
lncRNA	.:MSTRG.23753.1	PC-3p-14255_149	FLRT2:ENST00000330753
lncRNA	.:MSTRG.23760.1	PC-3p-14255_149	FLRT2:ENST00000330753
lncRNA	.:MSTRG.23776.1	PC-3p-14255_149	FLRT2:ENST00000330753
lncRNA	.:MSTRG.25236.1	PC-3p-14255_149	FLRT2:ENST00000330753
lncRNA	.:MSTRG.25242.1	PC-3p-14255_149	FLRT2:ENST00000330753
lncRNA	AC008957:MSTRG.25927.2	PC-3p-14255_149	FLRT2:ENST00000330753
lncRNA	AC015712:ENST00000560068	PC-3p-14255_149	FLRT2:ENST00000330753
lncRNA	AC020978:ENST00000571197	PC-3p-14255_149	FLRT2:ENST00000330753
lncRNA	AC097478:MSTRG.24911.12	PC-3p-14255_149	FLRT2:ENST00000330753
lncRNA	AL160254:MSTRG.8843.4	PC-3p-14255_149	FLRT2:ENST00000330753
lncRNA	AL353997:ENST00000579352	PC-3p-14255_149	FLRT2:ENST00000330753
lncRNA	AL357033:ENST00000370520	PC-3p-14255_149	FLRT2:ENST00000330753
lncRNA	AL359220:ENST00000500036	PC-3p-14255_149	FLRT2:ENST00000330753
lncRNA	ALG1L6P:MSTRG.23013.2	PC-3p-14255_149	FLRT2:ENST00000330753
lncRNA	ARID5B:MSTRG.3874.1	PC-3p-14255_149	FLRT2:ENST00000330753
lncRNA	BRD3OS:MSTRG.33432.3	PC-3p-14255_149	FLRT2:ENST00000330753
lncRNA	CREB1:MSTRG.19830.16	PC-3p-14255_149	FLRT2:ENST00000330753
lncRNA	CYP4F26P:MSTRG.32430.3	PC-3p-14255_149	FLRT2:ENST00000330753
lncRNA	FENDRR:ENST00000598996	PC-3p-14255_149	FLRT2:ENST00000330753
lncRNA	FENDRR:ENST00000599749	PC-3p-14255_149	FLRT2:ENST00000330753
lncRNA	FENDRR:MSTRG.13193.9	PC-3p-14255_149	FLRT2:ENST00000330753
lncRNA	FENDRR:MSTRG.13194.1	PC-3p-14255_149	FLRT2:ENST00000330753
lncRNA	FOXQ1:MSTRG.27375.1	PC-3p-14255_149	FLRT2:ENST00000330753
lncRNA	HCP5:ENST00000541196	PC-3p-14255_149	FLRT2:ENST00000330753
lncRNA	HMGA2-AS1:ENST00000356215	PC-3p-14255_149	FLRT2:ENST00000330753
lncRNA	LEMD1:MSTRG.2799.1	PC-3p-14255_149	FLRT2:ENST00000330753
lncRNA	LEMD1:MSTRG.2802.1	PC-3p-14255_149	FLRT2:ENST00000330753
lncRNA	LINC00662:ENST00000586954	PC-3p-14255_149	FLRT2:ENST00000330753
lncRNA	LINC01291:ENST00000377469	PC-3p-14255_149	FLRT2:ENST00000330753
lncRNA	LINC02615:MSTRG.25231.1	PC-3p-14255_149	FLRT2:ENST00000330753
lncRNA	MALAT1:MSTRG.5556.14	PC-3p-14255_149	FLRT2:ENST00000330753
lncRNA	NFIA:MSTRG.1182.2	PC-3p-14255_149	FLRT2:ENST00000330753
lncRNA	PECAM1:MSTRG.14975.10	PC-3p-14255_149	FLRT2:ENST00000330753
lncRNA	RANBP3L:MSTRG.25925.5	PC-3p-14255_149	FLRT2:ENST00000330753
lncRNA	SGO1-AS1:MSTRG.22450.9	PC-3p-14255_149	FLRT2:ENST00000330753
lncRNA	SLC22A3:MSTRG.29166.3	PC-3p-14255_149	FLRT2:ENST00000330753
lncRNA	STARD4:MSTRG.26591.1	PC-3p-14255_149	FLRT2:ENST00000330753
lncRNA	TFAP2A-AS1:MSTRG.27487.2	PC-3p-14255_149	FLRT2:ENST00000330753
lncRNA	VRK2:MSTRG.18363.2	PC-3p-14255_149	FLRT2:ENST00000330753
lncRNA	WARS2-AS1:MSTRG.1790.9	PC-3p-14255_149	FLRT2:ENST00000330753
circRNA	ciRNA685	PC-3p-14255_149	FLRT2:ENST00000330753
circRNA	circRNA2527	PC-3p-14255_149	FLRT2:ENST00000330753
circRNA	circRNA2560	PC-3p-14255_149	FLRT2:ENST00000330753
circRNA	circRNA4749	PC-3p-14255_149	FLRT2:ENST00000330753
circRNA	circRNA4750	PC-3p-14255_149	FLRT2:ENST00000330753
circRNA	circRNA9874	PC-3p-14255_149	FLRT2:ENST00000330753
circRNA	hsa_circ_0000606	PC-3p-14255_149	FLRT2:ENST00000330753
circRNA	hsa_circ_0005332	PC-3p-14255_149	FLRT2:ENST00000330753
circRNA	hsa_circ_0008250	PC-3p-14255_149	FLRT2:ENST00000330753
circRNA	hsa_circ_0089274	PC-3p-14255_149	FLRT2:ENST00000330753
lncRNA	.:MSTRG.23753.1	PC-3p-14255_149	FRMD5:ENST00000417257
lncRNA	.:MSTRG.23760.1	PC-3p-14255_149	FRMD5:ENST00000417257
lncRNA	.:MSTRG.23776.1	PC-3p-14255_149	FRMD5:ENST00000417257
lncRNA	.:MSTRG.25236.1	PC-3p-14255_149	FRMD5:ENST00000417257
lncRNA	.:MSTRG.25242.1	PC-3p-14255_149	FRMD5:ENST00000417257
lncRNA	AC008957:MSTRG.25927.2	PC-3p-14255_149	FRMD5:ENST00000417257
lncRNA	AC015712:ENST00000560068	PC-3p-14255_149	FRMD5:ENST00000417257
lncRNA	AC020978:ENST00000571197	PC-3p-14255_149	FRMD5:ENST00000417257
lncRNA	AC097478:MSTRG.24911.12	PC-3p-14255_149	FRMD5:ENST00000417257
lncRNA	AL160254:MSTRG.8843.4	PC-3p-14255_149	FRMD5:ENST00000417257
lncRNA	AL353997:ENST00000579352	PC-3p-14255_149	FRMD5:ENST00000417257
lncRNA	AL357033:ENST00000370520	PC-3p-14255_149	FRMD5:ENST00000417257
lncRNA	AL359220:ENST00000500036	PC-3p-14255_149	FRMD5:ENST00000417257
lncRNA	ALG1L6P:MSTRG.23013.2	PC-3p-14255_149	FRMD5:ENST00000417257
lncRNA	ARID5B:MSTRG.3874.1	PC-3p-14255_149	FRMD5:ENST00000417257
lncRNA	BRD3OS:MSTRG.33432.3	PC-3p-14255_149	FRMD5:ENST00000417257
lncRNA	CREB1:MSTRG.19830.16	PC-3p-14255_149	FRMD5:ENST00000417257
lncRNA	CYP4F26P:MSTRG.32430.3	PC-3p-14255_149	FRMD5:ENST00000417257
lncRNA	FENDRR:ENST00000598996	PC-3p-14255_149	FRMD5:ENST00000417257
lncRNA	FENDRR:ENST00000599749	PC-3p-14255_149	FRMD5:ENST00000417257
lncRNA	FENDRR:MSTRG.13193.9	PC-3p-14255_149	FRMD5:ENST00000417257
lncRNA	FENDRR:MSTRG.13194.1	PC-3p-14255_149	FRMD5:ENST00000417257
lncRNA	FOXQ1:MSTRG.27375.1	PC-3p-14255_149	FRMD5:ENST00000417257
lncRNA	HCP5:ENST00000541196	PC-3p-14255_149	FRMD5:ENST00000417257
lncRNA	HMGA2-AS1:ENST00000356215	PC-3p-14255_149	FRMD5:ENST00000417257
lncRNA	LEMD1:MSTRG.2799.1	PC-3p-14255_149	FRMD5:ENST00000417257
lncRNA	LEMD1:MSTRG.2802.1	PC-3p-14255_149	FRMD5:ENST00000417257
lncRNA	LINC00662:ENST00000586954	PC-3p-14255_149	FRMD5:ENST00000417257
lncRNA	LINC01291:ENST00000377469	PC-3p-14255_149	FRMD5:ENST00000417257
lncRNA	LINC02615:MSTRG.25231.1	PC-3p-14255_149	FRMD5:ENST00000417257
lncRNA	MALAT1:MSTRG.5556.14	PC-3p-14255_149	FRMD5:ENST00000417257
lncRNA	NFIA:MSTRG.1182.2	PC-3p-14255_149	FRMD5:ENST00000417257
lncRNA	PECAM1:MSTRG.14975.10	PC-3p-14255_149	FRMD5:ENST00000417257
lncRNA	RANBP3L:MSTRG.25925.5	PC-3p-14255_149	FRMD5:ENST00000417257
lncRNA	SGO1-AS1:MSTRG.22450.9	PC-3p-14255_149	FRMD5:ENST00000417257
lncRNA	SLC22A3:MSTRG.29166.3	PC-3p-14255_149	FRMD5:ENST00000417257
lncRNA	STARD4:MSTRG.26591.1	PC-3p-14255_149	FRMD5:ENST00000417257
lncRNA	TFAP2A-AS1:MSTRG.27487.2	PC-3p-14255_149	FRMD5:ENST00000417257
lncRNA	VRK2:MSTRG.18363.2	PC-3p-14255_149	FRMD5:ENST00000417257
lncRNA	WARS2-AS1:MSTRG.1790.9	PC-3p-14255_149	FRMD5:ENST00000417257
circRNA	ciRNA685	PC-3p-14255_149	FRMD5:ENST00000417257
circRNA	circRNA2527	PC-3p-14255_149	FRMD5:ENST00000417257
circRNA	circRNA2560	PC-3p-14255_149	FRMD5:ENST00000417257
circRNA	circRNA4749	PC-3p-14255_149	FRMD5:ENST00000417257
circRNA	circRNA4750	PC-3p-14255_149	FRMD5:ENST00000417257
circRNA	circRNA9874	PC-3p-14255_149	FRMD5:ENST00000417257
circRNA	hsa_circ_0000606	PC-3p-14255_149	FRMD5:ENST00000417257
circRNA	hsa_circ_0005332	PC-3p-14255_149	FRMD5:ENST00000417257
circRNA	hsa_circ_0008250	PC-3p-14255_149	FRMD5:ENST00000417257
circRNA	hsa_circ_0089274	PC-3p-14255_149	FRMD5:ENST00000417257
lncRNA	.:MSTRG.23753.1	PC-3p-14255_149	GLB1:ENST00000307363
lncRNA	.:MSTRG.23760.1	PC-3p-14255_149	GLB1:ENST00000307363
lncRNA	.:MSTRG.23776.1	PC-3p-14255_149	GLB1:ENST00000307363
lncRNA	.:MSTRG.25236.1	PC-3p-14255_149	GLB1:ENST00000307363
lncRNA	.:MSTRG.25242.1	PC-3p-14255_149	GLB1:ENST00000307363
lncRNA	AC008957:MSTRG.25927.2	PC-3p-14255_149	GLB1:ENST00000307363
lncRNA	AC015712:ENST00000560068	PC-3p-14255_149	GLB1:ENST00000307363
lncRNA	AC020978:ENST00000571197	PC-3p-14255_149	GLB1:ENST00000307363
lncRNA	AC097478:MSTRG.24911.12	PC-3p-14255_149	GLB1:ENST00000307363
lncRNA	AL160254:MSTRG.8843.4	PC-3p-14255_149	GLB1:ENST00000307363
lncRNA	AL353997:ENST00000579352	PC-3p-14255_149	GLB1:ENST00000307363
lncRNA	AL357033:ENST00000370520	PC-3p-14255_149	GLB1:ENST00000307363
lncRNA	AL359220:ENST00000500036	PC-3p-14255_149	GLB1:ENST00000307363
lncRNA	ALG1L6P:MSTRG.23013.2	PC-3p-14255_149	GLB1:ENST00000307363
lncRNA	ARID5B:MSTRG.3874.1	PC-3p-14255_149	GLB1:ENST00000307363
lncRNA	BRD3OS:MSTRG.33432.3	PC-3p-14255_149	GLB1:ENST00000307363
lncRNA	CREB1:MSTRG.19830.16	PC-3p-14255_149	GLB1:ENST00000307363
lncRNA	CYP4F26P:MSTRG.32430.3	PC-3p-14255_149	GLB1:ENST00000307363
lncRNA	FENDRR:ENST00000598996	PC-3p-14255_149	GLB1:ENST00000307363
lncRNA	FENDRR:ENST00000599749	PC-3p-14255_149	GLB1:ENST00000307363
lncRNA	FENDRR:MSTRG.13193.9	PC-3p-14255_149	GLB1:ENST00000307363
lncRNA	FENDRR:MSTRG.13194.1	PC-3p-14255_149	GLB1:ENST00000307363
lncRNA	FOXQ1:MSTRG.27375.1	PC-3p-14255_149	GLB1:ENST00000307363
lncRNA	HCP5:ENST00000541196	PC-3p-14255_149	GLB1:ENST00000307363
lncRNA	HMGA2-AS1:ENST00000356215	PC-3p-14255_149	GLB1:ENST00000307363
lncRNA	LEMD1:MSTRG.2799.1	PC-3p-14255_149	GLB1:ENST00000307363
lncRNA	LEMD1:MSTRG.2802.1	PC-3p-14255_149	GLB1:ENST00000307363
lncRNA	LINC00662:ENST00000586954	PC-3p-14255_149	GLB1:ENST00000307363
lncRNA	LINC01291:ENST00000377469	PC-3p-14255_149	GLB1:ENST00000307363
lncRNA	LINC02615:MSTRG.25231.1	PC-3p-14255_149	GLB1:ENST00000307363
lncRNA	MALAT1:MSTRG.5556.14	PC-3p-14255_149	GLB1:ENST00000307363
lncRNA	NFIA:MSTRG.1182.2	PC-3p-14255_149	GLB1:ENST00000307363
lncRNA	PECAM1:MSTRG.14975.10	PC-3p-14255_149	GLB1:ENST00000307363
lncRNA	RANBP3L:MSTRG.25925.5	PC-3p-14255_149	GLB1:ENST00000307363
lncRNA	SGO1-AS1:MSTRG.22450.9	PC-3p-14255_149	GLB1:ENST00000307363
lncRNA	SLC22A3:MSTRG.29166.3	PC-3p-14255_149	GLB1:ENST00000307363
lncRNA	STARD4:MSTRG.26591.1	PC-3p-14255_149	GLB1:ENST00000307363
lncRNA	TFAP2A-AS1:MSTRG.27487.2	PC-3p-14255_149	GLB1:ENST00000307363
lncRNA	VRK2:MSTRG.18363.2	PC-3p-14255_149	GLB1:ENST00000307363
lncRNA	WARS2-AS1:MSTRG.1790.9	PC-3p-14255_149	GLB1:ENST00000307363
circRNA	ciRNA685	PC-3p-14255_149	GLB1:ENST00000307363
circRNA	circRNA2527	PC-3p-14255_149	GLB1:ENST00000307363
circRNA	circRNA2560	PC-3p-14255_149	GLB1:ENST00000307363
circRNA	circRNA4749	PC-3p-14255_149	GLB1:ENST00000307363
circRNA	circRNA4750	PC-3p-14255_149	GLB1:ENST00000307363
circRNA	circRNA9874	PC-3p-14255_149	GLB1:ENST00000307363
circRNA	hsa_circ_0000606	PC-3p-14255_149	GLB1:ENST00000307363
circRNA	hsa_circ_0005332	PC-3p-14255_149	GLB1:ENST00000307363
circRNA	hsa_circ_0008250	PC-3p-14255_149	GLB1:ENST00000307363
circRNA	hsa_circ_0089274	PC-3p-14255_149	GLB1:ENST00000307363
lncRNA	.:MSTRG.23753.1	PC-3p-14255_149	GLB1:ENST00000307377
lncRNA	.:MSTRG.23760.1	PC-3p-14255_149	GLB1:ENST00000307377
lncRNA	.:MSTRG.23776.1	PC-3p-14255_149	GLB1:ENST00000307377
lncRNA	.:MSTRG.25236.1	PC-3p-14255_149	GLB1:ENST00000307377
lncRNA	.:MSTRG.25242.1	PC-3p-14255_149	GLB1:ENST00000307377
lncRNA	AC008957:MSTRG.25927.2	PC-3p-14255_149	GLB1:ENST00000307377
lncRNA	AC015712:ENST00000560068	PC-3p-14255_149	GLB1:ENST00000307377
lncRNA	AC020978:ENST00000571197	PC-3p-14255_149	GLB1:ENST00000307377
lncRNA	AC097478:MSTRG.24911.12	PC-3p-14255_149	GLB1:ENST00000307377
lncRNA	AL160254:MSTRG.8843.4	PC-3p-14255_149	GLB1:ENST00000307377
lncRNA	AL353997:ENST00000579352	PC-3p-14255_149	GLB1:ENST00000307377
lncRNA	AL357033:ENST00000370520	PC-3p-14255_149	GLB1:ENST00000307377
lncRNA	AL359220:ENST00000500036	PC-3p-14255_149	GLB1:ENST00000307377
lncRNA	ALG1L6P:MSTRG.23013.2	PC-3p-14255_149	GLB1:ENST00000307377
lncRNA	ARID5B:MSTRG.3874.1	PC-3p-14255_149	GLB1:ENST00000307377
lncRNA	BRD3OS:MSTRG.33432.3	PC-3p-14255_149	GLB1:ENST00000307377
lncRNA	CREB1:MSTRG.19830.16	PC-3p-14255_149	GLB1:ENST00000307377
lncRNA	CYP4F26P:MSTRG.32430.3	PC-3p-14255_149	GLB1:ENST00000307377
lncRNA	FENDRR:ENST00000598996	PC-3p-14255_149	GLB1:ENST00000307377
lncRNA	FENDRR:ENST00000599749	PC-3p-14255_149	GLB1:ENST00000307377
lncRNA	FENDRR:MSTRG.13193.9	PC-3p-14255_149	GLB1:ENST00000307377
lncRNA	FENDRR:MSTRG.13194.1	PC-3p-14255_149	GLB1:ENST00000307377
lncRNA	FOXQ1:MSTRG.27375.1	PC-3p-14255_149	GLB1:ENST00000307377
lncRNA	HCP5:ENST00000541196	PC-3p-14255_149	GLB1:ENST00000307377
lncRNA	HMGA2-AS1:ENST00000356215	PC-3p-14255_149	GLB1:ENST00000307377
lncRNA	LEMD1:MSTRG.2799.1	PC-3p-14255_149	GLB1:ENST00000307377
lncRNA	LEMD1:MSTRG.2802.1	PC-3p-14255_149	GLB1:ENST00000307377
lncRNA	LINC00662:ENST00000586954	PC-3p-14255_149	GLB1:ENST00000307377
lncRNA	LINC01291:ENST00000377469	PC-3p-14255_149	GLB1:ENST00000307377
lncRNA	LINC02615:MSTRG.25231.1	PC-3p-14255_149	GLB1:ENST00000307377
lncRNA	MALAT1:MSTRG.5556.14	PC-3p-14255_149	GLB1:ENST00000307377
lncRNA	NFIA:MSTRG.1182.2	PC-3p-14255_149	GLB1:ENST00000307377
lncRNA	PECAM1:MSTRG.14975.10	PC-3p-14255_149	GLB1:ENST00000307377
lncRNA	RANBP3L:MSTRG.25925.5	PC-3p-14255_149	GLB1:ENST00000307377
lncRNA	SGO1-AS1:MSTRG.22450.9	PC-3p-14255_149	GLB1:ENST00000307377
lncRNA	SLC22A3:MSTRG.29166.3	PC-3p-14255_149	GLB1:ENST00000307377
lncRNA	STARD4:MSTRG.26591.1	PC-3p-14255_149	GLB1:ENST00000307377
lncRNA	TFAP2A-AS1:MSTRG.27487.2	PC-3p-14255_149	GLB1:ENST00000307377
lncRNA	VRK2:MSTRG.18363.2	PC-3p-14255_149	GLB1:ENST00000307377
lncRNA	WARS2-AS1:MSTRG.1790.9	PC-3p-14255_149	GLB1:ENST00000307377
circRNA	ciRNA685	PC-3p-14255_149	GLB1:ENST00000307377
circRNA	circRNA2527	PC-3p-14255_149	GLB1:ENST00000307377
circRNA	circRNA2560	PC-3p-14255_149	GLB1:ENST00000307377
circRNA	circRNA4749	PC-3p-14255_149	GLB1:ENST00000307377
circRNA	circRNA4750	PC-3p-14255_149	GLB1:ENST00000307377
circRNA	circRNA9874	PC-3p-14255_149	GLB1:ENST00000307377
circRNA	hsa_circ_0000606	PC-3p-14255_149	GLB1:ENST00000307377
circRNA	hsa_circ_0005332	PC-3p-14255_149	GLB1:ENST00000307377
circRNA	hsa_circ_0008250	PC-3p-14255_149	GLB1:ENST00000307377
circRNA	hsa_circ_0089274	PC-3p-14255_149	GLB1:ENST00000307377
lncRNA	.:MSTRG.23753.1	PC-3p-14255_149	GLYR1:ENST00000588732
lncRNA	.:MSTRG.23760.1	PC-3p-14255_149	GLYR1:ENST00000588732
lncRNA	.:MSTRG.23776.1	PC-3p-14255_149	GLYR1:ENST00000588732
lncRNA	.:MSTRG.25236.1	PC-3p-14255_149	GLYR1:ENST00000588732
lncRNA	.:MSTRG.25242.1	PC-3p-14255_149	GLYR1:ENST00000588732
lncRNA	AC008957:MSTRG.25927.2	PC-3p-14255_149	GLYR1:ENST00000588732
lncRNA	AC015712:ENST00000560068	PC-3p-14255_149	GLYR1:ENST00000588732
lncRNA	AC020978:ENST00000571197	PC-3p-14255_149	GLYR1:ENST00000588732
lncRNA	AC097478:MSTRG.24911.12	PC-3p-14255_149	GLYR1:ENST00000588732
lncRNA	AL160254:MSTRG.8843.4	PC-3p-14255_149	GLYR1:ENST00000588732
lncRNA	AL353997:ENST00000579352	PC-3p-14255_149	GLYR1:ENST00000588732
lncRNA	AL357033:ENST00000370520	PC-3p-14255_149	GLYR1:ENST00000588732
lncRNA	AL359220:ENST00000500036	PC-3p-14255_149	GLYR1:ENST00000588732
lncRNA	ALG1L6P:MSTRG.23013.2	PC-3p-14255_149	GLYR1:ENST00000588732
lncRNA	ARID5B:MSTRG.3874.1	PC-3p-14255_149	GLYR1:ENST00000588732
lncRNA	BRD3OS:MSTRG.33432.3	PC-3p-14255_149	GLYR1:ENST00000588732
lncRNA	CREB1:MSTRG.19830.16	PC-3p-14255_149	GLYR1:ENST00000588732
lncRNA	CYP4F26P:MSTRG.32430.3	PC-3p-14255_149	GLYR1:ENST00000588732
lncRNA	FENDRR:ENST00000598996	PC-3p-14255_149	GLYR1:ENST00000588732
lncRNA	FENDRR:ENST00000599749	PC-3p-14255_149	GLYR1:ENST00000588732
lncRNA	FENDRR:MSTRG.13193.9	PC-3p-14255_149	GLYR1:ENST00000588732
lncRNA	FENDRR:MSTRG.13194.1	PC-3p-14255_149	GLYR1:ENST00000588732
lncRNA	FOXQ1:MSTRG.27375.1	PC-3p-14255_149	GLYR1:ENST00000588732
lncRNA	HCP5:ENST00000541196	PC-3p-14255_149	GLYR1:ENST00000588732
lncRNA	HMGA2-AS1:ENST00000356215	PC-3p-14255_149	GLYR1:ENST00000588732
lncRNA	LEMD1:MSTRG.2799.1	PC-3p-14255_149	GLYR1:ENST00000588732
lncRNA	LEMD1:MSTRG.2802.1	PC-3p-14255_149	GLYR1:ENST00000588732
lncRNA	LINC00662:ENST00000586954	PC-3p-14255_149	GLYR1:ENST00000588732
lncRNA	LINC01291:ENST00000377469	PC-3p-14255_149	GLYR1:ENST00000588732
lncRNA	LINC02615:MSTRG.25231.1	PC-3p-14255_149	GLYR1:ENST00000588732
lncRNA	MALAT1:MSTRG.5556.14	PC-3p-14255_149	GLYR1:ENST00000588732
lncRNA	NFIA:MSTRG.1182.2	PC-3p-14255_149	GLYR1:ENST00000588732
lncRNA	PECAM1:MSTRG.14975.10	PC-3p-14255_149	GLYR1:ENST00000588732
lncRNA	RANBP3L:MSTRG.25925.5	PC-3p-14255_149	GLYR1:ENST00000588732
lncRNA	SGO1-AS1:MSTRG.22450.9	PC-3p-14255_149	GLYR1:ENST00000588732
lncRNA	SLC22A3:MSTRG.29166.3	PC-3p-14255_149	GLYR1:ENST00000588732
lncRNA	STARD4:MSTRG.26591.1	PC-3p-14255_149	GLYR1:ENST00000588732
lncRNA	TFAP2A-AS1:MSTRG.27487.2	PC-3p-14255_149	GLYR1:ENST00000588732
lncRNA	VRK2:MSTRG.18363.2	PC-3p-14255_149	GLYR1:ENST00000588732
lncRNA	WARS2-AS1:MSTRG.1790.9	PC-3p-14255_149	GLYR1:ENST00000588732
circRNA	ciRNA685	PC-3p-14255_149	GLYR1:ENST00000588732
circRNA	circRNA2527	PC-3p-14255_149	GLYR1:ENST00000588732
circRNA	circRNA2560	PC-3p-14255_149	GLYR1:ENST00000588732
circRNA	circRNA4749	PC-3p-14255_149	GLYR1:ENST00000588732
circRNA	circRNA4750	PC-3p-14255_149	GLYR1:ENST00000588732
circRNA	circRNA9874	PC-3p-14255_149	GLYR1:ENST00000588732
circRNA	hsa_circ_0000606	PC-3p-14255_149	GLYR1:ENST00000588732
circRNA	hsa_circ_0005332	PC-3p-14255_149	GLYR1:ENST00000588732
circRNA	hsa_circ_0008250	PC-3p-14255_149	GLYR1:ENST00000588732
circRNA	hsa_circ_0089274	PC-3p-14255_149	GLYR1:ENST00000588732
lncRNA	.:MSTRG.23753.1	PC-3p-14255_149	GRIP1:ENST00000359742
lncRNA	.:MSTRG.23760.1	PC-3p-14255_149	GRIP1:ENST00000359742
lncRNA	.:MSTRG.23776.1	PC-3p-14255_149	GRIP1:ENST00000359742
lncRNA	.:MSTRG.25236.1	PC-3p-14255_149	GRIP1:ENST00000359742
lncRNA	.:MSTRG.25242.1	PC-3p-14255_149	GRIP1:ENST00000359742
lncRNA	AC008957:MSTRG.25927.2	PC-3p-14255_149	GRIP1:ENST00000359742
lncRNA	AC015712:ENST00000560068	PC-3p-14255_149	GRIP1:ENST00000359742
lncRNA	AC020978:ENST00000571197	PC-3p-14255_149	GRIP1:ENST00000359742
lncRNA	AC097478:MSTRG.24911.12	PC-3p-14255_149	GRIP1:ENST00000359742
lncRNA	AL160254:MSTRG.8843.4	PC-3p-14255_149	GRIP1:ENST00000359742
lncRNA	AL353997:ENST00000579352	PC-3p-14255_149	GRIP1:ENST00000359742
lncRNA	AL357033:ENST00000370520	PC-3p-14255_149	GRIP1:ENST00000359742
lncRNA	AL359220:ENST00000500036	PC-3p-14255_149	GRIP1:ENST00000359742
lncRNA	ALG1L6P:MSTRG.23013.2	PC-3p-14255_149	GRIP1:ENST00000359742
lncRNA	ARID5B:MSTRG.3874.1	PC-3p-14255_149	GRIP1:ENST00000359742
lncRNA	BRD3OS:MSTRG.33432.3	PC-3p-14255_149	GRIP1:ENST00000359742
lncRNA	CREB1:MSTRG.19830.16	PC-3p-14255_149	GRIP1:ENST00000359742
lncRNA	CYP4F26P:MSTRG.32430.3	PC-3p-14255_149	GRIP1:ENST00000359742
lncRNA	FENDRR:ENST00000598996	PC-3p-14255_149	GRIP1:ENST00000359742
lncRNA	FENDRR:ENST00000599749	PC-3p-14255_149	GRIP1:ENST00000359742
lncRNA	FENDRR:MSTRG.13193.9	PC-3p-14255_149	GRIP1:ENST00000359742
lncRNA	FENDRR:MSTRG.13194.1	PC-3p-14255_149	GRIP1:ENST00000359742
lncRNA	FOXQ1:MSTRG.27375.1	PC-3p-14255_149	GRIP1:ENST00000359742
lncRNA	HCP5:ENST00000541196	PC-3p-14255_149	GRIP1:ENST00000359742
lncRNA	HMGA2-AS1:ENST00000356215	PC-3p-14255_149	GRIP1:ENST00000359742
lncRNA	LEMD1:MSTRG.2799.1	PC-3p-14255_149	GRIP1:ENST00000359742
lncRNA	LEMD1:MSTRG.2802.1	PC-3p-14255_149	GRIP1:ENST00000359742
lncRNA	LINC00662:ENST00000586954	PC-3p-14255_149	GRIP1:ENST00000359742
lncRNA	LINC01291:ENST00000377469	PC-3p-14255_149	GRIP1:ENST00000359742
lncRNA	LINC02615:MSTRG.25231.1	PC-3p-14255_149	GRIP1:ENST00000359742
lncRNA	MALAT1:MSTRG.5556.14	PC-3p-14255_149	GRIP1:ENST00000359742
lncRNA	NFIA:MSTRG.1182.2	PC-3p-14255_149	GRIP1:ENST00000359742
lncRNA	PECAM1:MSTRG.14975.10	PC-3p-14255_149	GRIP1:ENST00000359742
lncRNA	RANBP3L:MSTRG.25925.5	PC-3p-14255_149	GRIP1:ENST00000359742
lncRNA	SGO1-AS1:MSTRG.22450.9	PC-3p-14255_149	GRIP1:ENST00000359742
lncRNA	SLC22A3:MSTRG.29166.3	PC-3p-14255_149	GRIP1:ENST00000359742
lncRNA	STARD4:MSTRG.26591.1	PC-3p-14255_149	GRIP1:ENST00000359742
lncRNA	TFAP2A-AS1:MSTRG.27487.2	PC-3p-14255_149	GRIP1:ENST00000359742
lncRNA	VRK2:MSTRG.18363.2	PC-3p-14255_149	GRIP1:ENST00000359742
lncRNA	WARS2-AS1:MSTRG.1790.9	PC-3p-14255_149	GRIP1:ENST00000359742
circRNA	ciRNA685	PC-3p-14255_149	GRIP1:ENST00000359742
circRNA	circRNA2527	PC-3p-14255_149	GRIP1:ENST00000359742
circRNA	circRNA2560	PC-3p-14255_149	GRIP1:ENST00000359742
circRNA	circRNA4749	PC-3p-14255_149	GRIP1:ENST00000359742
circRNA	circRNA4750	PC-3p-14255_149	GRIP1:ENST00000359742
circRNA	circRNA9874	PC-3p-14255_149	GRIP1:ENST00000359742
circRNA	hsa_circ_0000606	PC-3p-14255_149	GRIP1:ENST00000359742
circRNA	hsa_circ_0005332	PC-3p-14255_149	GRIP1:ENST00000359742
circRNA	hsa_circ_0008250	PC-3p-14255_149	GRIP1:ENST00000359742
circRNA	hsa_circ_0089274	PC-3p-14255_149	GRIP1:ENST00000359742
lncRNA	.:MSTRG.23753.1	PC-3p-14255_149	GUCD1:ENST00000621833
lncRNA	.:MSTRG.23760.1	PC-3p-14255_149	GUCD1:ENST00000621833
lncRNA	.:MSTRG.23776.1	PC-3p-14255_149	GUCD1:ENST00000621833
lncRNA	.:MSTRG.25236.1	PC-3p-14255_149	GUCD1:ENST00000621833
lncRNA	.:MSTRG.25242.1	PC-3p-14255_149	GUCD1:ENST00000621833
lncRNA	AC008957:MSTRG.25927.2	PC-3p-14255_149	GUCD1:ENST00000621833
lncRNA	AC015712:ENST00000560068	PC-3p-14255_149	GUCD1:ENST00000621833
lncRNA	AC020978:ENST00000571197	PC-3p-14255_149	GUCD1:ENST00000621833
lncRNA	AC097478:MSTRG.24911.12	PC-3p-14255_149	GUCD1:ENST00000621833
lncRNA	AL160254:MSTRG.8843.4	PC-3p-14255_149	GUCD1:ENST00000621833
lncRNA	AL353997:ENST00000579352	PC-3p-14255_149	GUCD1:ENST00000621833
lncRNA	AL357033:ENST00000370520	PC-3p-14255_149	GUCD1:ENST00000621833
lncRNA	AL359220:ENST00000500036	PC-3p-14255_149	GUCD1:ENST00000621833
lncRNA	ALG1L6P:MSTRG.23013.2	PC-3p-14255_149	GUCD1:ENST00000621833
lncRNA	ARID5B:MSTRG.3874.1	PC-3p-14255_149	GUCD1:ENST00000621833
lncRNA	BRD3OS:MSTRG.33432.3	PC-3p-14255_149	GUCD1:ENST00000621833
lncRNA	CREB1:MSTRG.19830.16	PC-3p-14255_149	GUCD1:ENST00000621833
lncRNA	CYP4F26P:MSTRG.32430.3	PC-3p-14255_149	GUCD1:ENST00000621833
lncRNA	FENDRR:ENST00000598996	PC-3p-14255_149	GUCD1:ENST00000621833
lncRNA	FENDRR:ENST00000599749	PC-3p-14255_149	GUCD1:ENST00000621833
lncRNA	FENDRR:MSTRG.13193.9	PC-3p-14255_149	GUCD1:ENST00000621833
lncRNA	FENDRR:MSTRG.13194.1	PC-3p-14255_149	GUCD1:ENST00000621833
lncRNA	FOXQ1:MSTRG.27375.1	PC-3p-14255_149	GUCD1:ENST00000621833
lncRNA	HCP5:ENST00000541196	PC-3p-14255_149	GUCD1:ENST00000621833
lncRNA	HMGA2-AS1:ENST00000356215	PC-3p-14255_149	GUCD1:ENST00000621833
lncRNA	LEMD1:MSTRG.2799.1	PC-3p-14255_149	GUCD1:ENST00000621833
lncRNA	LEMD1:MSTRG.2802.1	PC-3p-14255_149	GUCD1:ENST00000621833
lncRNA	LINC00662:ENST00000586954	PC-3p-14255_149	GUCD1:ENST00000621833
lncRNA	LINC01291:ENST00000377469	PC-3p-14255_149	GUCD1:ENST00000621833
lncRNA	LINC02615:MSTRG.25231.1	PC-3p-14255_149	GUCD1:ENST00000621833
lncRNA	MALAT1:MSTRG.5556.14	PC-3p-14255_149	GUCD1:ENST00000621833
lncRNA	NFIA:MSTRG.1182.2	PC-3p-14255_149	GUCD1:ENST00000621833
lncRNA	PECAM1:MSTRG.14975.10	PC-3p-14255_149	GUCD1:ENST00000621833
lncRNA	RANBP3L:MSTRG.25925.5	PC-3p-14255_149	GUCD1:ENST00000621833
lncRNA	SGO1-AS1:MSTRG.22450.9	PC-3p-14255_149	GUCD1:ENST00000621833
lncRNA	SLC22A3:MSTRG.29166.3	PC-3p-14255_149	GUCD1:ENST00000621833
lncRNA	STARD4:MSTRG.26591.1	PC-3p-14255_149	GUCD1:ENST00000621833
lncRNA	TFAP2A-AS1:MSTRG.27487.2	PC-3p-14255_149	GUCD1:ENST00000621833
lncRNA	VRK2:MSTRG.18363.2	PC-3p-14255_149	GUCD1:ENST00000621833
lncRNA	WARS2-AS1:MSTRG.1790.9	PC-3p-14255_149	GUCD1:ENST00000621833
circRNA	ciRNA685	PC-3p-14255_149	GUCD1:ENST00000621833
circRNA	circRNA2527	PC-3p-14255_149	GUCD1:ENST00000621833
circRNA	circRNA2560	PC-3p-14255_149	GUCD1:ENST00000621833
circRNA	circRNA4749	PC-3p-14255_149	GUCD1:ENST00000621833
circRNA	circRNA4750	PC-3p-14255_149	GUCD1:ENST00000621833
circRNA	circRNA9874	PC-3p-14255_149	GUCD1:ENST00000621833
circRNA	hsa_circ_0000606	PC-3p-14255_149	GUCD1:ENST00000621833
circRNA	hsa_circ_0005332	PC-3p-14255_149	GUCD1:ENST00000621833
circRNA	hsa_circ_0008250	PC-3p-14255_149	GUCD1:ENST00000621833
circRNA	hsa_circ_0089274	PC-3p-14255_149	GUCD1:ENST00000621833
lncRNA	.:MSTRG.23753.1	PC-3p-14255_149	HIPK3:ENST00000379016
lncRNA	.:MSTRG.23760.1	PC-3p-14255_149	HIPK3:ENST00000379016
lncRNA	.:MSTRG.23776.1	PC-3p-14255_149	HIPK3:ENST00000379016
lncRNA	.:MSTRG.25236.1	PC-3p-14255_149	HIPK3:ENST00000379016
lncRNA	.:MSTRG.25242.1	PC-3p-14255_149	HIPK3:ENST00000379016
lncRNA	AC008957:MSTRG.25927.2	PC-3p-14255_149	HIPK3:ENST00000379016
lncRNA	AC015712:ENST00000560068	PC-3p-14255_149	HIPK3:ENST00000379016
lncRNA	AC020978:ENST00000571197	PC-3p-14255_149	HIPK3:ENST00000379016
lncRNA	AC097478:MSTRG.24911.12	PC-3p-14255_149	HIPK3:ENST00000379016
lncRNA	AL160254:MSTRG.8843.4	PC-3p-14255_149	HIPK3:ENST00000379016
lncRNA	AL353997:ENST00000579352	PC-3p-14255_149	HIPK3:ENST00000379016
lncRNA	AL357033:ENST00000370520	PC-3p-14255_149	HIPK3:ENST00000379016
lncRNA	AL359220:ENST00000500036	PC-3p-14255_149	HIPK3:ENST00000379016
lncRNA	ALG1L6P:MSTRG.23013.2	PC-3p-14255_149	HIPK3:ENST00000379016
lncRNA	ARID5B:MSTRG.3874.1	PC-3p-14255_149	HIPK3:ENST00000379016
lncRNA	BRD3OS:MSTRG.33432.3	PC-3p-14255_149	HIPK3:ENST00000379016
lncRNA	CREB1:MSTRG.19830.16	PC-3p-14255_149	HIPK3:ENST00000379016
lncRNA	CYP4F26P:MSTRG.32430.3	PC-3p-14255_149	HIPK3:ENST00000379016
lncRNA	FENDRR:ENST00000598996	PC-3p-14255_149	HIPK3:ENST00000379016
lncRNA	FENDRR:ENST00000599749	PC-3p-14255_149	HIPK3:ENST00000379016
lncRNA	FENDRR:MSTRG.13193.9	PC-3p-14255_149	HIPK3:ENST00000379016
lncRNA	FENDRR:MSTRG.13194.1	PC-3p-14255_149	HIPK3:ENST00000379016
lncRNA	FOXQ1:MSTRG.27375.1	PC-3p-14255_149	HIPK3:ENST00000379016
lncRNA	HCP5:ENST00000541196	PC-3p-14255_149	HIPK3:ENST00000379016
lncRNA	HMGA2-AS1:ENST00000356215	PC-3p-14255_149	HIPK3:ENST00000379016
lncRNA	LEMD1:MSTRG.2799.1	PC-3p-14255_149	HIPK3:ENST00000379016
lncRNA	LEMD1:MSTRG.2802.1	PC-3p-14255_149	HIPK3:ENST00000379016
lncRNA	LINC00662:ENST00000586954	PC-3p-14255_149	HIPK3:ENST00000379016
lncRNA	LINC01291:ENST00000377469	PC-3p-14255_149	HIPK3:ENST00000379016
lncRNA	LINC02615:MSTRG.25231.1	PC-3p-14255_149	HIPK3:ENST00000379016
lncRNA	MALAT1:MSTRG.5556.14	PC-3p-14255_149	HIPK3:ENST00000379016
lncRNA	NFIA:MSTRG.1182.2	PC-3p-14255_149	HIPK3:ENST00000379016
lncRNA	PECAM1:MSTRG.14975.10	PC-3p-14255_149	HIPK3:ENST00000379016
lncRNA	RANBP3L:MSTRG.25925.5	PC-3p-14255_149	HIPK3:ENST00000379016
lncRNA	SGO1-AS1:MSTRG.22450.9	PC-3p-14255_149	HIPK3:ENST00000379016
lncRNA	SLC22A3:MSTRG.29166.3	PC-3p-14255_149	HIPK3:ENST00000379016
lncRNA	STARD4:MSTRG.26591.1	PC-3p-14255_149	HIPK3:ENST00000379016
lncRNA	TFAP2A-AS1:MSTRG.27487.2	PC-3p-14255_149	HIPK3:ENST00000379016
lncRNA	VRK2:MSTRG.18363.2	PC-3p-14255_149	HIPK3:ENST00000379016
lncRNA	WARS2-AS1:MSTRG.1790.9	PC-3p-14255_149	HIPK3:ENST00000379016
circRNA	ciRNA685	PC-3p-14255_149	HIPK3:ENST00000379016
circRNA	circRNA2527	PC-3p-14255_149	HIPK3:ENST00000379016
circRNA	circRNA2560	PC-3p-14255_149	HIPK3:ENST00000379016
circRNA	circRNA4749	PC-3p-14255_149	HIPK3:ENST00000379016
circRNA	circRNA4750	PC-3p-14255_149	HIPK3:ENST00000379016
circRNA	circRNA9874	PC-3p-14255_149	HIPK3:ENST00000379016
circRNA	hsa_circ_0000606	PC-3p-14255_149	HIPK3:ENST00000379016
circRNA	hsa_circ_0005332	PC-3p-14255_149	HIPK3:ENST00000379016
[truncated: 328,870+ more rows]
