# Supplementary material for: Comprehensive analysis of TGF-β-induced mRNAs and ncRNAs in hepatocellular carcinoma
Source: Aging (Albany NY). 2020 Oct 4;12(19):19399–420. doi: 10.18632/aging.103826 (PMC7732333; doi:10.18632/aging.103826)
Supplement: Supplementary Table 9 [file aging-12-103826-s010..xlsx]

## Sheet: Sheet1
Supplementary Table 9. ceRNA networks of lncRNA SLC7A11-AS1.
lncRNA	miRNA	gene_id
SLC7A11-AS1	bta-miR-378_R+2	ADAR
SLC7A11-AS1	bta-miR-378_R+2	ADAR
SLC7A11-AS1	bta-miR-378_R+2	AGK
SLC7A11-AS1	bta-miR-378_R+2	AGK
SLC7A11-AS1	bta-miR-378_R+2	ALDH3A2
SLC7A11-AS1	bta-miR-378_R+2	AMFR
SLC7A11-AS1	bta-miR-378_R+2	ANKFY1
SLC7A11-AS1	bta-miR-378_R+2	ATP5F1A
SLC7A11-AS1	bta-miR-378_R+2	BBS1
SLC7A11-AS1	bta-miR-378_R+2	BCL2L11
SLC7A11-AS1	bta-miR-378_R+2	C11orf49
SLC7A11-AS1	bta-miR-378_R+2	CEP85
SLC7A11-AS1	bta-miR-378_R+2	CFAP44
SLC7A11-AS1	bta-miR-378_R+2	CHD1L
SLC7A11-AS1	bta-miR-378_R+2	CHD1L
SLC7A11-AS1	bta-miR-378_R+2	CLDN12
SLC7A11-AS1	bta-miR-378_R+2	CSNK2A1
SLC7A11-AS1	bta-miR-378_R+2	CTC1
SLC7A11-AS1	bta-miR-378_R+2	CTNNA1
SLC7A11-AS1	bta-miR-378_R+2	DCBLD1
SLC7A11-AS1	bta-miR-378_R+2	DDAH1
SLC7A11-AS1	bta-miR-378_R+2	DDX47
SLC7A11-AS1	bta-miR-378_R+2	DHCR24
SLC7A11-AS1	bta-miR-378_R+2	ENSA
SLC7A11-AS1	bta-miR-378_R+2	EPB41
SLC7A11-AS1	bta-miR-378_R+2	ERLIN2
SLC7A11-AS1	bta-miR-378_R+2	ERRFI1
SLC7A11-AS1	bta-miR-378_R+2	ERRFI1
SLC7A11-AS1	bta-miR-378_R+2	FAM161B
SLC7A11-AS1	bta-miR-378_R+2	FLRT2
SLC7A11-AS1	bta-miR-378_R+2	GPI
SLC7A11-AS1	bta-miR-378_R+2	GPNMB
SLC7A11-AS1	bta-miR-378_R+2	GPT2
SLC7A11-AS1	bta-miR-378_R+2	HIPK3
SLC7A11-AS1	bta-miR-378_R+2	HLTF
SLC7A11-AS1	bta-miR-378_R+2	IGF1R
SLC7A11-AS1	bta-miR-378_R+2	IGF1R
SLC7A11-AS1	bta-miR-378_R+2	IL6ST
SLC7A11-AS1	bta-miR-378_R+2	ITGA11
SLC7A11-AS1	bta-miR-378_R+2	ITGA11
SLC7A11-AS1	bta-miR-378_R+2	KANSL3
SLC7A11-AS1	bta-miR-378_R+2	KCND1
SLC7A11-AS1	bta-miR-378_R+2	KRT80
SLC7A11-AS1	bta-miR-378_R+2	KRT80
SLC7A11-AS1	bta-miR-378_R+2	MAP2K6
SLC7A11-AS1	bta-miR-378_R+2	NCF2
SLC7A11-AS1	bta-miR-378_R+2	NEIL1
SLC7A11-AS1	bta-miR-378_R+2	NFAT5
SLC7A11-AS1	bta-miR-378_R+2	NRL
SLC7A11-AS1	bta-miR-378_R+2	NSMCE1
SLC7A11-AS1	bta-miR-378_R+2	NUDT9
SLC7A11-AS1	bta-miR-378_R+2	NUMA1
SLC7A11-AS1	bta-miR-378_R+2	PIN4
SLC7A11-AS1	bta-miR-378_R+2	PIWIL2
SLC7A11-AS1	bta-miR-378_R+2	PLEKHA2
SLC7A11-AS1	bta-miR-378_R+2	POLG
SLC7A11-AS1	bta-miR-378_R+2	PRPSAP2
SLC7A11-AS1	bta-miR-378_R+2	PRPSAP2
SLC7A11-AS1	bta-miR-378_R+2	RAD23A
SLC7A11-AS1	bta-miR-378_R+2	RBMS2
SLC7A11-AS1	bta-miR-378_R+2	RTN2
SLC7A11-AS1	bta-miR-378_R+2	S1PR1
SLC7A11-AS1	bta-miR-378_R+2	SH3GLB1
SLC7A11-AS1	bta-miR-378_R+2	SH3GLB1
SLC7A11-AS1	bta-miR-378_R+2	SLC7A11
SLC7A11-AS1	bta-miR-378_R+2	SOCS6
SLC7A11-AS1	bta-miR-378_R+2	TBC1D24
SLC7A11-AS1	bta-miR-378_R+2	TBC1D24
SLC7A11-AS1	bta-miR-378_R+2	TBC1D24
SLC7A11-AS1	bta-miR-378_R+2	TM4SF1
SLC7A11-AS1	bta-miR-378_R+2	TMEM222
SLC7A11-AS1	bta-miR-378_R+2	TMTC2
SLC7A11-AS1	bta-miR-378_R+2	TNS3
SLC7A11-AS1	bta-miR-378_R+2	TOGARAM2
SLC7A11-AS1	bta-miR-378_R+2	TSFM
SLC7A11-AS1	bta-miR-378_R+2	WARS
SLC7A11-AS1	bta-miR-378_R+2	WARS
SLC7A11-AS1	bta-miR-378_R+2	WDR7
SLC7A11-AS1	hsa-miR-10400-5p_R-3_1ss12GA	ADGRG1
SLC7A11-AS1	hsa-miR-10400-5p_R-3_1ss12GA	ADGRG1
SLC7A11-AS1	hsa-miR-10400-5p_R-3_1ss12GA	APOL1
SLC7A11-AS1	hsa-miR-10400-5p_R-3_1ss12GA	CTC1
SLC7A11-AS1	hsa-miR-10400-5p_R-3_1ss12GA	EXTL3
SLC7A11-AS1	hsa-miR-10400-5p_R-3_1ss12GA	GRB7
SLC7A11-AS1	hsa-miR-10400-5p_R-3_1ss12GA	GRB7
SLC7A11-AS1	hsa-miR-10400-5p_R-3_1ss12GA	KANSL3
SLC7A11-AS1	hsa-miR-10400-5p_R-3_1ss12GA	POU2F1
SLC7A11-AS1	hsa-miR-10400-5p_R-3_1ss12GA	PRELID3A
SLC7A11-AS1	hsa-miR-10400-5p_R-3_1ss12GA	RER1
SLC7A11-AS1	hsa-miR-10400-5p_R-3_1ss12GA	RTN4R
SLC7A11-AS1	hsa-miR-10400-5p_R-3_1ss12GA	RUNX1
SLC7A11-AS1	hsa-miR-10400-5p_R-3_1ss12GA	RUNX1
SLC7A11-AS1	hsa-miR-10400-5p_R-3_1ss12GA	TSFM
SLC7A11-AS1	hsa-miR-10400-5p_R-3_1ss12GA	TXNRD2
SLC7A11-AS1	hsa-miR-2110_R+1	AC107871
SLC7A11-AS1	hsa-miR-2110_R+1	ACSL4
SLC7A11-AS1	hsa-miR-2110_R+1	ARHGEF9
SLC7A11-AS1	hsa-miR-2110_R+1	ARPIN
SLC7A11-AS1	hsa-miR-2110_R+1	ATP8A1
SLC7A11-AS1	hsa-miR-2110_R+1	ATP8A1
SLC7A11-AS1	hsa-miR-2110_R+1	AZIN2
SLC7A11-AS1	hsa-miR-2110_R+1	BCL2L11
SLC7A11-AS1	hsa-miR-2110_R+1	CALU
SLC7A11-AS1	hsa-miR-2110_R+1	CCL5
SLC7A11-AS1	hsa-miR-2110_R+1	CCL5
SLC7A11-AS1	hsa-miR-2110_R+1	CCL5
SLC7A11-AS1	hsa-miR-2110_R+1	CCNA2
SLC7A11-AS1	hsa-miR-2110_R+1	CDK2
SLC7A11-AS1	hsa-miR-2110_R+1	CFAP44
SLC7A11-AS1	hsa-miR-2110_R+1	CFL1
SLC7A11-AS1	hsa-miR-2110_R+1	CIT
SLC7A11-AS1	hsa-miR-2110_R+1	CLDN1
SLC7A11-AS1	hsa-miR-2110_R+1	CLDND1
SLC7A11-AS1	hsa-miR-2110_R+1	CLDND1
SLC7A11-AS1	hsa-miR-2110_R+1	CNOT6L
SLC7A11-AS1	hsa-miR-2110_R+1	COPZ1
SLC7A11-AS1	hsa-miR-2110_R+1	CSNK1G1
SLC7A11-AS1	hsa-miR-2110_R+1	CSNK2A1
SLC7A11-AS1	hsa-miR-2110_R+1	CYLD
SLC7A11-AS1	hsa-miR-2110_R+1	CYREN
SLC7A11-AS1	hsa-miR-2110_R+1	DARS2
SLC7A11-AS1	hsa-miR-2110_R+1	DDX47
SLC7A11-AS1	hsa-miR-2110_R+1	DIPK1A
SLC7A11-AS1	hsa-miR-2110_R+1	DIPK1A
SLC7A11-AS1	hsa-miR-2110_R+1	DUSP4
SLC7A11-AS1	hsa-miR-2110_R+1	EIF2B2
SLC7A11-AS1	hsa-miR-2110_R+1	EPB41
SLC7A11-AS1	hsa-miR-2110_R+1	ESR1
SLC7A11-AS1	hsa-miR-2110_R+1	F11R
SLC7A11-AS1	hsa-miR-2110_R+1	FAM129A
SLC7A11-AS1	hsa-miR-2110_R+1	FIBIN
SLC7A11-AS1	hsa-miR-2110_R+1	G3BP2
SLC7A11-AS1	hsa-miR-2110_R+1	GABBR1
SLC7A11-AS1	hsa-miR-2110_R+1	GNPDA1
SLC7A11-AS1	hsa-miR-2110_R+1	GPATCH8
SLC7A11-AS1	hsa-miR-2110_R+1	GRK6
SLC7A11-AS1	hsa-miR-2110_R+1	GTPBP2
SLC7A11-AS1	hsa-miR-2110_R+1	HIPK3
SLC7A11-AS1	hsa-miR-2110_R+1	HKDC1
SLC7A11-AS1	hsa-miR-2110_R+1	HNRNPU
SLC7A11-AS1	hsa-miR-2110_R+1	HTR1D
SLC7A11-AS1	hsa-miR-2110_R+1	IL6ST
SLC7A11-AS1	hsa-miR-2110_R+1	JMJD6
SLC7A11-AS1	hsa-miR-2110_R+1	JTB
SLC7A11-AS1	hsa-miR-2110_R+1	LGALS8
SLC7A11-AS1	hsa-miR-2110_R+1	LMBR1
SLC7A11-AS1	hsa-miR-2110_R+1	LUZP1
SLC7A11-AS1	hsa-miR-2110_R+1	MAP2K6
SLC7A11-AS1	hsa-miR-2110_R+1	MAP3K2
SLC7A11-AS1	hsa-miR-2110_R+1	MFAP3L
SLC7A11-AS1	hsa-miR-2110_R+1	MFAP3L
SLC7A11-AS1	hsa-miR-2110_R+1	MICU1
SLC7A11-AS1	hsa-miR-2110_R+1	MIER3
SLC7A11-AS1	hsa-miR-2110_R+1	MMP2
SLC7A11-AS1	hsa-miR-2110_R+1	NCOA1
SLC7A11-AS1	hsa-miR-2110_R+1	NDUFB5
SLC7A11-AS1	hsa-miR-2110_R+1	NHP2
SLC7A11-AS1	hsa-miR-2110_R+1	NSMCE1
SLC7A11-AS1	hsa-miR-2110_R+1	OGG1
SLC7A11-AS1	hsa-miR-2110_R+1	OSBPL9
SLC7A11-AS1	hsa-miR-2110_R+1	PDE8A
SLC7A11-AS1	hsa-miR-2110_R+1	PGRMC2
SLC7A11-AS1	hsa-miR-2110_R+1	PHGDH
SLC7A11-AS1	hsa-miR-2110_R+1	PHGDH
SLC7A11-AS1	hsa-miR-2110_R+1	PHKA1
SLC7A11-AS1	hsa-miR-2110_R+1	PIWIL2
SLC7A11-AS1	hsa-miR-2110_R+1	PLEKHA2
SLC7A11-AS1	hsa-miR-2110_R+1	POLDIP3
SLC7A11-AS1	hsa-miR-2110_R+1	POLG
SLC7A11-AS1	hsa-miR-2110_R+1	POU2F1
SLC7A11-AS1	hsa-miR-2110_R+1	PPP6C
SLC7A11-AS1	hsa-miR-2110_R+1	PRDM1
SLC7A11-AS1	hsa-miR-2110_R+1	PRELID3A
SLC7A11-AS1	hsa-miR-2110_R+1	PRKAR1A
SLC7A11-AS1	hsa-miR-2110_R+1	PRPSAP2
SLC7A11-AS1	hsa-miR-2110_R+1	PSMD12
SLC7A11-AS1	hsa-miR-2110_R+1	PTTG1IP
SLC7A11-AS1	hsa-miR-2110_R+1	RABL2B
SLC7A11-AS1	hsa-miR-2110_R+1	RGS5
SLC7A11-AS1	hsa-miR-2110_R+1	RHOC
SLC7A11-AS1	hsa-miR-2110_R+1	RMND5B
SLC7A11-AS1	hsa-miR-2110_R+1	RMND5B
SLC7A11-AS1	hsa-miR-2110_R+1	RSAD2
SLC7A11-AS1	hsa-miR-2110_R+1	SCNN1A
SLC7A11-AS1	hsa-miR-2110_R+1	SCYL3
SLC7A11-AS1	hsa-miR-2110_R+1	SEC24A
SLC7A11-AS1	hsa-miR-2110_R+1	44077
SLC7A11-AS1	hsa-miR-2110_R+1	SERPINE1
SLC7A11-AS1	hsa-miR-2110_R+1	SHOC2
SLC7A11-AS1	hsa-miR-2110_R+1	SLC12A9
SLC7A11-AS1	hsa-miR-2110_R+1	SLC2A5
SLC7A11-AS1	hsa-miR-2110_R+1	SLC35E1
SLC7A11-AS1	hsa-miR-2110_R+1	SLC35E2B
SLC7A11-AS1	hsa-miR-2110_R+1	SLC38A7
SLC7A11-AS1	hsa-miR-2110_R+1	SLC52A3
SLC7A11-AS1	hsa-miR-2110_R+1	SLC7A11
SLC7A11-AS1	hsa-miR-2110_R+1	SPCS3
SLC7A11-AS1	hsa-miR-2110_R+1	TAPBPL
SLC7A11-AS1	hsa-miR-2110_R+1	TBC1D2
SLC7A11-AS1	hsa-miR-2110_R+1	TBC1D2
SLC7A11-AS1	hsa-miR-2110_R+1	TGIF2
SLC7A11-AS1	hsa-miR-2110_R+1	THAP2
SLC7A11-AS1	hsa-miR-2110_R+1	TICAM2
SLC7A11-AS1	hsa-miR-2110_R+1	TMEM53
SLC7A11-AS1	hsa-miR-2110_R+1	TNS3
SLC7A11-AS1	hsa-miR-2110_R+1	TOX4
SLC7A11-AS1	hsa-miR-2110_R+1	TPP1
SLC7A11-AS1	hsa-miR-2110_R+1	TPP1
SLC7A11-AS1	hsa-miR-2110_R+1	TSEN15
SLC7A11-AS1	hsa-miR-2110_R+1	TSEN15
SLC7A11-AS1	hsa-miR-2110_R+1	TSFM
SLC7A11-AS1	hsa-miR-2110_R+1	UBE2V1
SLC7A11-AS1	hsa-miR-2110_R+1	WDR35
SLC7A11-AS1	hsa-miR-2110_R+1	XBP1
SLC7A11-AS1	hsa-miR-2110_R+1	XBP1
SLC7A11-AS1	hsa-miR-2110_R+1	ZFP36L1
SLC7A11-AS1	hsa-miR-2110_R+1	ZNF333
SLC7A11-AS1	hsa-miR-330-3p	AC107871
SLC7A11-AS1	hsa-miR-330-3p	ACTC1
SLC7A11-AS1	hsa-miR-330-3p	ADCY7
SLC7A11-AS1	hsa-miR-330-3p	AJUBA
SLC7A11-AS1	hsa-miR-330-3p	AJUBA
SLC7A11-AS1	hsa-miR-330-3p	AKR1B1
SLC7A11-AS1	hsa-miR-330-3p	AMIGO2
SLC7A11-AS1	hsa-miR-330-3p	APPL2
SLC7A11-AS1	hsa-miR-330-3p	ARMCX6
SLC7A11-AS1	hsa-miR-330-3p	ARNTL2
SLC7A11-AS1	hsa-miR-330-3p	ATP2C1
SLC7A11-AS1	hsa-miR-330-3p	ATP5F1A
SLC7A11-AS1	hsa-miR-330-3p	ATP5F1A
SLC7A11-AS1	hsa-miR-330-3p	BCL2L11
SLC7A11-AS1	hsa-miR-330-3p	BDNF
SLC7A11-AS1	hsa-miR-330-3p	BHLHB9
SLC7A11-AS1	hsa-miR-330-3p	BIRC2
SLC7A11-AS1	hsa-miR-330-3p	BLOC1S6
SLC7A11-AS1	hsa-miR-330-3p	BMPR2
SLC7A11-AS1	hsa-miR-330-3p	C1orf112
SLC7A11-AS1	hsa-miR-330-3p	C4BPA
SLC7A11-AS1	hsa-miR-330-3p	CALM1
SLC7A11-AS1	hsa-miR-330-3p	CAST
SLC7A11-AS1	hsa-miR-330-3p	CBR1
SLC7A11-AS1	hsa-miR-330-3p	CCL5
SLC7A11-AS1	hsa-miR-330-3p	CCL5
SLC7A11-AS1	hsa-miR-330-3p	CCL5
SLC7A11-AS1	hsa-miR-330-3p	CCN2
SLC7A11-AS1	hsa-miR-330-3p	CCPG1
SLC7A11-AS1	hsa-miR-330-3p	CLDN1
SLC7A11-AS1	hsa-miR-330-3p	CPLANE1
SLC7A11-AS1	hsa-miR-330-3p	CREBZF
SLC7A11-AS1	hsa-miR-330-3p	DAG1
SLC7A11-AS1	hsa-miR-330-3p	DUSP16
SLC7A11-AS1	hsa-miR-330-3p	EEF1A1
SLC7A11-AS1	hsa-miR-330-3p	ENKD1
SLC7A11-AS1	hsa-miR-330-3p	ERRFI1
SLC7A11-AS1	hsa-miR-330-3p	ESR1
SLC7A11-AS1	hsa-miR-330-3p	FAM107B
SLC7A11-AS1	hsa-miR-330-3p	FAM45A
SLC7A11-AS1	hsa-miR-330-3p	FHL2
SLC7A11-AS1	hsa-miR-330-3p	FHL2
SLC7A11-AS1	hsa-miR-330-3p	FHL2
SLC7A11-AS1	hsa-miR-330-3p	FIBIN
SLC7A11-AS1	hsa-miR-330-3p	FLRT2
SLC7A11-AS1	hsa-miR-330-3p	FSD1L
SLC7A11-AS1	hsa-miR-330-3p	GJC1
SLC7A11-AS1	hsa-miR-330-3p	GPI
SLC7A11-AS1	hsa-miR-330-3p	GSTM4
SLC7A11-AS1	hsa-miR-330-3p	GULP1
SLC7A11-AS1	hsa-miR-330-3p	HDAC7
SLC7A11-AS1	hsa-miR-330-3p	HNRNPU
SLC7A11-AS1	hsa-miR-330-3p	IL6ST
SLC7A11-AS1	hsa-miR-330-3p	LARP6
SLC7A11-AS1	hsa-miR-330-3p	LRRC49
SLC7A11-AS1	hsa-miR-330-3p	LUZP1
SLC7A11-AS1	hsa-miR-330-3p	MANBA
SLC7A11-AS1	hsa-miR-330-3p	MDH2
SLC7A11-AS1	hsa-miR-330-3p	MED6
SLC7A11-AS1	hsa-miR-330-3p	METTL1
SLC7A11-AS1	hsa-miR-330-3p	MIER3
SLC7A11-AS1	hsa-miR-330-3p	MMP2
SLC7A11-AS1	hsa-miR-330-3p	MRM2
SLC7A11-AS1	hsa-miR-330-3p	NEDD9
SLC7A11-AS1	hsa-miR-330-3p	NFAT5
SLC7A11-AS1	hsa-miR-330-3p	NUDT13
SLC7A11-AS1	hsa-miR-330-3p	NUP98
SLC7A11-AS1	hsa-miR-330-3p	OGFRL1
SLC7A11-AS1	hsa-miR-330-3p	PCMT1
SLC7A11-AS1	hsa-miR-330-3p	PCMT1
SLC7A11-AS1	hsa-miR-330-3p	PGRMC2
SLC7A11-AS1	hsa-miR-330-3p	PICALM
SLC7A11-AS1	hsa-miR-330-3p	PLAGL1
SLC7A11-AS1	hsa-miR-330-3p	PLEKHB2
SLC7A11-AS1	hsa-miR-330-3p	PLOD2
SLC7A11-AS1	hsa-miR-330-3p	PLSCR4
SLC7A11-AS1	hsa-miR-330-3p	PPCS
SLC7A11-AS1	hsa-miR-330-3p	PPP6C
SLC7A11-AS1	hsa-miR-330-3p	PTPRK
SLC7A11-AS1	hsa-miR-330-3p	RALGPS2
SLC7A11-AS1	hsa-miR-330-3p	RASSF8
SLC7A11-AS1	hsa-miR-330-3p	RASSF8
SLC7A11-AS1	hsa-miR-330-3p	RCAN3
SLC7A11-AS1	hsa-miR-330-3p	RGS5
SLC7A11-AS1	hsa-miR-330-3p	RND3
SLC7A11-AS1	hsa-miR-330-3p	RNF4
SLC7A11-AS1	hsa-miR-330-3p	ROR1
SLC7A11-AS1	hsa-miR-330-3p	RPL35A
SLC7A11-AS1	hsa-miR-330-3p	RSAD2
SLC7A11-AS1	hsa-miR-330-3p	RUNX1
SLC7A11-AS1	hsa-miR-330-3p	RUNX1
SLC7A11-AS1	hsa-miR-330-3p	SCN1A
SLC7A11-AS1	hsa-miR-330-3p	SDR16C5
SLC7A11-AS1	hsa-miR-330-3p	SEC13
SLC7A11-AS1	hsa-miR-330-3p	SEC13
SLC7A11-AS1	hsa-miR-330-3p	SLC18B1
SLC7A11-AS1	hsa-miR-330-3p	SLC25A27
SLC7A11-AS1	hsa-miR-330-3p	SLC30A6
SLC7A11-AS1	hsa-miR-330-3p	SLC35E1
SLC7A11-AS1	hsa-miR-330-3p	SLC52A3
SLC7A11-AS1	hsa-miR-330-3p	STC2
SLC7A11-AS1	hsa-miR-330-3p	STK3
SLC7A11-AS1	hsa-miR-330-3p	SURF4
SLC7A11-AS1	hsa-miR-330-3p	TBC1D24
SLC7A11-AS1	hsa-miR-330-3p	TFPI
SLC7A11-AS1	hsa-miR-330-3p	TMEM245
SLC7A11-AS1	hsa-miR-330-3p	TMTC2
SLC7A11-AS1	hsa-miR-330-3p	TOGARAM2
SLC7A11-AS1	hsa-miR-330-3p	TOX4
SLC7A11-AS1	hsa-miR-330-3p	TPM1
SLC7A11-AS1	hsa-miR-330-3p	TSFM
SLC7A11-AS1	hsa-miR-330-3p	TSN
SLC7A11-AS1	hsa-miR-330-3p	TSN
SLC7A11-AS1	hsa-miR-330-3p	TSPAN8
SLC7A11-AS1	hsa-miR-330-3p	TTPAL
SLC7A11-AS1	hsa-miR-330-3p	TVP23C
SLC7A11-AS1	hsa-miR-330-3p	TXNRD1
SLC7A11-AS1	hsa-miR-330-3p	VMP1
SLC7A11-AS1	hsa-miR-330-3p	VPS50
SLC7A11-AS1	hsa-miR-330-3p	WARS
SLC7A11-AS1	hsa-miR-330-3p	WARS
