# Supplementary material for: Comprehensive analysis of TGF-β-induced mRNAs and ncRNAs in hepatocellular carcinoma
Source: Aging (Albany NY). 2020 Oct 4;12(19):19399–420. doi: 10.18632/aging.103826 (PMC7732333; doi:10.18632/aging.103826)
Supplement: Supplementary Table 10 [file aging-12-103826-s011..xlsx]

## Sheet: ceRNA_cirRNA
Supplementary Table 10. ceRNA networks of hsa_circ_0006123.
RNA	miRNA	gene_id
hsa_circ_0006123	PC-5p-13745_156	ADAMTS16
hsa_circ_0006123	PC-5p-13745_156	AGK
hsa_circ_0006123	PC-5p-13745_156	ARHGEF9
hsa_circ_0006123	PC-5p-13745_156	ARMC8
hsa_circ_0006123	PC-5p-13745_156	BCL2L11
hsa_circ_0006123	PC-5p-13745_156	BHLHB9
hsa_circ_0006123	PC-5p-13745_156	BLOC1S6
hsa_circ_0006123	PC-5p-13745_156	BMPER
hsa_circ_0006123	PC-5p-13745_156	BMPR2
hsa_circ_0006123	PC-5p-13745_156	CACNB2
hsa_circ_0006123	PC-5p-13745_156	CCPG1
hsa_circ_0006123	PC-5p-13745_156	CD59
hsa_circ_0006123	PC-5p-13745_156	CD59
hsa_circ_0006123	PC-5p-13745_156	CDK2
hsa_circ_0006123	PC-5p-13745_156	CEBPG
hsa_circ_0006123	PC-5p-13745_156	CEMIP2
hsa_circ_0006123	PC-5p-13745_156	CHD1L
hsa_circ_0006123	PC-5p-13745_156	CSNK2A1
hsa_circ_0006123	PC-5p-13745_156	CSNK2A1
hsa_circ_0006123	PC-5p-13745_156	CSNK2B
hsa_circ_0006123	PC-5p-13745_156	CSRNP2
hsa_circ_0006123	PC-5p-13745_156	CSRP1
hsa_circ_0006123	PC-5p-13745_156	CYLD
hsa_circ_0006123	PC-5p-13745_156	CYREN
hsa_circ_0006123	PC-5p-13745_156	DCBLD1
hsa_circ_0006123	PC-5p-13745_156	DHCR24
hsa_circ_0006123	PC-5p-13745_156	DNAJC14
hsa_circ_0006123	PC-5p-13745_156	DNMT1
hsa_circ_0006123	PC-5p-13745_156	DPH2
hsa_circ_0006123	PC-5p-13745_156	EPB41L4A
hsa_circ_0006123	PC-5p-13745_156	ERP29
hsa_circ_0006123	PC-5p-13745_156	ESR1
hsa_circ_0006123	PC-5p-13745_156	EXD2
hsa_circ_0006123	PC-5p-13745_156	F11R
hsa_circ_0006123	PC-5p-13745_156	FAM131A
hsa_circ_0006123	PC-5p-13745_156	FBXW2
hsa_circ_0006123	PC-5p-13745_156	FHL2
hsa_circ_0006123	PC-5p-13745_156	FHL2
hsa_circ_0006123	PC-5p-13745_156	FHL2
hsa_circ_0006123	PC-5p-13745_156	FLRT2
hsa_circ_0006123	PC-5p-13745_156	GLA
hsa_circ_0006123	PC-5p-13745_156	GLUL
hsa_circ_0006123	PC-5p-13745_156	GPNMB
hsa_circ_0006123	PC-5p-13745_156	GUCD1
hsa_circ_0006123	PC-5p-13745_156	GULP1
hsa_circ_0006123	PC-5p-13745_156	HES2
hsa_circ_0006123	PC-5p-13745_156	HNRNPU
hsa_circ_0006123	PC-5p-13745_156	JMJD6
hsa_circ_0006123	PC-5p-13745_156	KANSL1
hsa_circ_0006123	PC-5p-13745_156	KRT80
hsa_circ_0006123	PC-5p-13745_156	KRT80
hsa_circ_0006123	PC-5p-13745_156	LMBRD1
hsa_circ_0006123	PC-5p-13745_156	MANBA
hsa_circ_0006123	PC-5p-13745_156	MAP2K6
hsa_circ_0006123	PC-5p-13745_156	MAP3K2
hsa_circ_0006123	PC-5p-13745_156	MICU1
hsa_circ_0006123	PC-5p-13745_156	MRM2
hsa_circ_0006123	PC-5p-13745_156	NCAPG2
hsa_circ_0006123	PC-5p-13745_156	NEDD9
hsa_circ_0006123	PC-5p-13745_156	NEDD9
hsa_circ_0006123	PC-5p-13745_156	NFAT5
hsa_circ_0006123	PC-5p-13745_156	NSFL1C
hsa_circ_0006123	PC-5p-13745_156	NTMT1
hsa_circ_0006123	PC-5p-13745_156	NUDT16
hsa_circ_0006123	PC-5p-13745_156	NUP98
hsa_circ_0006123	PC-5p-13745_156	OASL
hsa_circ_0006123	PC-5p-13745_156	ORC4
hsa_circ_0006123	PC-5p-13745_156	PCNX4
hsa_circ_0006123	PC-5p-13745_156	PDE8A
hsa_circ_0006123	PC-5p-13745_156	PIWIL2
hsa_circ_0006123	PC-5p-13745_156	PLXDC2
hsa_circ_0006123	PC-5p-13745_156	POLDIP3
hsa_circ_0006123	PC-5p-13745_156	PPP4C
hsa_circ_0006123	PC-5p-13745_156	PRKAG1
hsa_circ_0006123	PC-5p-13745_156	PSMC1
hsa_circ_0006123	PC-5p-13745_156	PXYLP1
hsa_circ_0006123	PC-5p-13745_156	RALGPS2
hsa_circ_0006123	PC-5p-13745_156	RBMS2
hsa_circ_0006123	PC-5p-13745_156	ROR1
hsa_circ_0006123	PC-5p-13745_156	RSAD2
hsa_circ_0006123	PC-5p-13745_156	RUNX1
hsa_circ_0006123	PC-5p-13745_156	RUNX1
hsa_circ_0006123	PC-5p-13745_156	S1PR1
hsa_circ_0006123	PC-5p-13745_156	SCN1A
hsa_circ_0006123	PC-5p-13745_156	SCNN1A
hsa_circ_0006123	PC-5p-13745_156	SH3GLB1
hsa_circ_0006123	PC-5p-13745_156	SH3GLB1
hsa_circ_0006123	PC-5p-13745_156	SIRT5
hsa_circ_0006123	PC-5p-13745_156	SLC26A2
hsa_circ_0006123	PC-5p-13745_156	SLC35E2B
hsa_circ_0006123	PC-5p-13745_156	SLC7A11
hsa_circ_0006123	PC-5p-13745_156	SOCS4
hsa_circ_0006123	PC-5p-13745_156	STARD4
hsa_circ_0006123	PC-5p-13745_156	STON1
hsa_circ_0006123	PC-5p-13745_156	SUCLA2
hsa_circ_0006123	PC-5p-13745_156	SURF4
hsa_circ_0006123	PC-5p-13745_156	TAF5L
hsa_circ_0006123	PC-5p-13745_156	TFPI
hsa_circ_0006123	PC-5p-13745_156	THAP2
hsa_circ_0006123	PC-5p-13745_156	TMEM39A
hsa_circ_0006123	PC-5p-13745_156	TOGARAM2
hsa_circ_0006123	PC-5p-13745_156	TP53RK
hsa_circ_0006123	PC-5p-13745_156	ULBP1
hsa_circ_0006123	PC-5p-13745_156	YIPF5
hsa_circ_0006123	PC-5p-13745_156	YIPF5
hsa_circ_0006123	PC-5p-13745_156	YTHDF2
hsa_circ_0006123	PC-5p-13745_156	ZNF322
hsa_circ_0006123	PC-5p-13745_156	ZNF426
